# Supplementary material
Source: PubMed Central journal article supplement (PMC2867708)
Supplement: 0913199107_sd01.pdf [file 0913199107_sd01.pdf]

SupplementalMultipleSequenceAlign.txt

In this file, full sequence alignments are provided for the proteins noted in the text as having clear indications for (or against) microcompartment targeting. The aligned sequences are in FASTA format. The aligned sequences for a given protein family can be viewed by 'copying' and 'pasting' the sequences into Jalview or a similar program. Aligned sequences are provided for 11 protein families believed to be involved in compartmentalized enzymatic reactions: PduC, PduD, PduE, PduG, PduH, PduO, PduP, EutB, EutC, EutG, and Pfl2. Each protein family is indicated by a "%" label and the protein family name, followed by a set of aligned sequences. Each protein sequence begins with the label ">gi". Genes that were identified as being associated with microcompartment function based on their chromosomal proximity to BMC shell genes are denoted by a "++" after the ">gi" label. The NCBI gene accession ID and annotation follow the ">gi" or ">gi++" label. For analyzing a family of aligned sequences in a viewing program (e.g. Jalview), the text to be copied and pasted should begin with the ">gi" label for the first sequence from the family, and should end prior to the "=====" label that separates distinct protein families from each other.

% PduC [targeting tail not implicated]

>gi++|215487213|ref|YP\_002329644.1| propanediol dehydratase, large subunit, AdoCbl-dependent [Escherichia coli O127:H6 str. E2348/69]  
-----MRSKRFEALAKRPVNQDGFVKEWIEEGFIAMESPNDPKPS-IKIVNG  
VVTELDGKPANQFDLIDHFIARYGINLARAEVIA MDSVKLANMLCDPNVKRSDIVPLTT  
AMTPAKIVEVVSQMNVMEMMMAMQKMRARRTPSQAHVTNIKDNPVQIAADAAEGAWRGF  
DEQETTAVARYAPFNAIALLVGSQVGRPGVLTQCSLEEATELKLGLGHTCYAETISVY  
GTEPVFTDGDTPWSKGF LASSYASRGLKMRFTSGSGSEVQMGYAEGKSMLYLEARCIYI  
TKAAGVQGLQNGSVSICIGVPSAVPSGIRAVLAENLICSSLDLECASSNDQTFTHSDMRRT  
ARFLMQFLPGTDFISSGFSVAPNYDNMFAGSNEDAEDFDDYNVIQRDLKVDGGLRPVREE  
DVIAIRNKAARALQAVFAGMGLPPITDEEVEEAATYAHGSKDMPERNIVEDIKFAQEIIHK  
NRNSLEVVKALAQGGFTDVAQDMLNMQKAKLTGDYLHTSAIIVDDGQVLSAVNDVNDYAG  
PATGYRL-----  
-----

>gi++|218782820|ref|YP\_002434138.1| Glycerol dehydratase [Desulfatibacillum alkenivorans AK-01]  
-----MQKRQKRFEVLEQRAVNKDGFIKEWAEVGLVAMDSPYDPKPG-LKIENG  
KVVEMDGI PCAEFDMIDTFIANHCIDVNVAAEAMAI DSLEFAKKLVDINVSGAEIKRLVP  
GLTPAKILDILKKNVVELMMAMQKLRCKRTPANQAHITNVKDTPALLAADSAEGSFRGF  
QELETTVGIARYAPMNAIALLIGGVGCRGTLTQCAVEEAMELQMGMKGLTAYAETVSVY  
GTDQVFVDGDDTPWSKAFLASAYASRGIKMRFTSGTGSEVQMGYANKKSMLYLEIKCIMI  
TKGAGVQGLQNGSISICIGVPGAVPGGIRAVLAENVATVLLDLEVASGNDQTFTHSPIRNT  
ARMLMQFLPGTDYVFSGYSVGNPNYDNMFAGSTHSDDFDDMLVLQRDLQCDMALRPVTEE  
QIIAVRNKAARAMQAVFQEVGFPAITDEEVEEAATYAHGSKDMPDRNQPEDLRAIEEFLKS  
GKTGLDIVRALHKHGFQDVAESVLGMLKQKQVSGDYLHTSAIVDENFNVKS AVNDRNDYMG  
PGTYRLEGER--WELLKNIPQAIS-----  
-----

-----PEDI-----  
>gi++|218705533|ref|YP\_002413052.1| Glycerol dehydratase large subunit [Escherichia coli UMN026]  
-----MRSKRFEALAKRPVNQDGFVKEWIEEGFIAMESPNDPKPS-IKIVNG

SupplementalMultipleSequenceAlign.txt

VVTELDGKPANQFDLIDHFIARYGINLARAEVVIAMDSVLANMLCDPNVKRSDIVPLTT  
AMTPAKIVEVVSQMNVEEMMMAMQKMRARRTPSQQAHVTVNVDNPNVQIAADAAEGAWRGF  
DEQETTAVARYAPFNAIALLVGSQVGRPGVLTQCSLEEATELKLGLGHTCYAETISVY  
GTEPVFTDGGDDTPWSKGFCLASSYASRGLKMRFTSGSGSEVQMGYAEGKSMLYLEARCIYI  
TKAAGVQGLQNGSVSCIGVPSAVPSGIRAVLAENLICSSLDLECASSNDQTFTHSDMRRT  
ARFLMQFLPGTDFISSGFSAPVNYDNMFAGSNEDAEDFDDYVNIQRDLKVDGGLRPVREE  
DVIAIRNKAARALQAVFAGMGLPPITDEEVEEAATYAHGSKDMPERNIVEDIKFAQEIINK  
NRNSLEVVKALAQGGFTDVAQDMLNMQKAKLTGDYLHTSAIIVDDGQVLSAVNDVNDYAG  
PATGYRLQGER--WEEIKNIPGALD-----

-----PNEID-----

>gi++|218549343|ref|YP\_002383134.1| glycerol dehydratase large subunit [Escherichia  
fergusonii ATCC 35469]

-----MRSKRFEALAKRPVNQDGFVKEWIEEGFIAMESPNDPKPS-IKIVNG  
AVTELDGKSVSQFDLIDHFIARYGINLARAEVITMDSVLANMLCDPNVKRRDIVPLTT  
AMTPAKIVEVVSQMNVEEMMMAMQKMRARRTPSQQAHVTVNVDNPNVQIAADAAEGAWRGF  
DEQETTAVAGRYAPFNAIALLVGSQVGRPGVLTQCSLEEATELKLGLGHTCYAETISVY  
GTEPVFTDGGDDTPWSKGFCLASSYASRGLKMRFTSGSGSEVQMGYAEGKSMLYLEARCIYI  
TKAAGVQGLQNGSVSCVGVPSAVPSGIRAVLAENLICALDLECASSNDQTFTHSDMRRT  
ARFLMQFLPGTDFISSGFSAPVNYDNMFAGSNEDAEDFDDYVNIQRDLKVDGGLRPVREE  
DVIAIRNKAARALQAVFAGMGLPPITDEEVEEAATYAHGSKDMPERNIVEDIKFAQEIINK  
NRNGLEVVKALAKGGFTDVAQDMLNIQKAKLTGDYLHTSAIIVGNGEVRSAVNDVNDYAG  
PATGYRLQGER--WEEIKNIPGALD-----

-----PNELG-----

>gi++|205353185|ref|YP\_002226986.1| glycerol dehydratase large subunit [Salmonella  
enterica subsp. enterica serovar Gallinarum str. 287/91]

-----MRSKRFEALAKRPVSDGFVKEWIEEGFIAMESPNDPKPS-IKIVNG  
AVTELDGKPVSEFDLIDHFIARYGINLNRAEEVMAMDSVLANMLCDPNVKRSEIVPLTT  
AMTPAKIVEVVSQMNVEEMMMAMQKMRARRTPSQQAHVTVNVDNPNVQIAADAAEGAWRGF  
DEQETTAVARYAPFNAIALLVGSQVGRPGVLTQCSLEEATELKLGLGHTCYAETISVY  
GTEPVFTDGGDDTPWSKGFCLASSYASRGLKMRFTS--GSEVQMGYAEGKSMLYLEARCIYI  
TKAAGVQGLQNGSVSCIGVPSAVPSGIRAVLAENLICSSLDLECASSNDQTFTHSDMRRT  
ARLLMQFLTGTDFISSGYSAPVNYDNMFAGSNEDAEDFDDYVNIQRDLKVDGGLRPVREE  
DVIAIRNKAARALQAVFAGMGLPPITDEEVEEAATYAHGSKDMPERNIVEDIKFSQEIINK  
NRNGLEVVKALAQGGFTDVAQDMLNIQKAKLTGDYLHTSAIIVGDGQVLSAVNDVNDYAG  
PATGYRLQGER--WEEIKNIPGALD-----

-----PNEID-----

>gi++|125717397|ref|YP\_001034530.1| glycerol dehydratase large subunit pduC,  
putative [Streptococcus sanguinis SK36]

-----MRSKRFEVLSERPINQDGFVKEWVEEGLVAMESPNDPKPS-IKIQNG  
KVVELDGGPKKEEFDLIDQFIANYGIDLSLAEVVIQMSREIANKILTPSVPRTEIIKLTK  
AMTPAKIIEVVNQMNVEIMMCLQKMRTRKQTATQAHVTNVNDNPNVQIAADAAEGALRGF  
AEQETTAVVRYAPFNALSMLIGSQVGRPGVLTQCSLEEATELEFGMRGFTAYAETISVY  
GTEDVFTDGGDDTPWSKAFSLASAYASRGLKMRFTSGTGSEVQMGQAEGKSMLYLEARCLYV  
TKAAGVQGTQNGSVSCIGIPAAVPSGIRAVVAENLIASMLDLECASSNDQTFTHSDLRRS  
VRTLMQFAPGTDIFNSGYSATPNYDNMFAGSNWDAEDFDDYVNLQRDLRVDGGLRPVREE  
EVVKVRNKAARVMQALFKGLGLPQITDEEVEEAATYAHGSKDMPERDKVEDIKAAQGILER  
GVQGADLIKALANNGFPEVANELLNLFKQRVAGDFLQTSIFDRDWNVISAVNSPNDYVG  
VGTGHRLVGEE--WEKVKDIPKAID-----

-----PRDV-----

>gi++|123442946|ref|YP\_001006921.1| putative propanediol utilization protein:  
dehydratase, large subunit [Yersinia enterocolitica subsp. enterocolitica 8081]

-----MKSFRFEALAKRPVNQDGFVKEWIEEGFIAMESPNDPKPS-IKIVNG  
VVTELDGKPKQSSFDLIDHFIARYGINLAHAEVVMKMSIKLANMLCDPNVSRRTIVPLTT  
AMTPAKIVEVVSQMNVEEMMMAMQKMRARRTPSQQAHVTVNVDNPNVQIAADAAEGAFRGF  
DEQETTAVARYAPFNAIALLVGSQVGRPGVLTQCSLEEATELKLGLGHTCYAETISVY

SupplementalMultipleSequenceAlign.txt

GTEPVFTDGDTPWSKGF LASSYASRGLKMRFTSGSGSEVQMGYAEGKSMLYLEARCIYI  
TKAAGVQGLQNGSVSCVGVPSAVPSGIRAILAENLICSALDLECASSNDQTFTHSDMRRT  
ARLLMQFLPGTDFISSGYSVAVPNYDNMFAGSNEDAEDFDDYNVMQRDLKVDGGLRPVLEA  
DVVAIRNKAARALQAVFAGMGLPPITDEEVIAATYAHGSKDMPERNIVEDIKFAQEIISK  
NRTGLEVVKALAQGGFEDVAQDMLNIQKAKIAGDYLHTSAIIKGDNQVLSAVNDVNDYAG  
PATGYRLEGAR--WEEIKNIPNALD-----  
-----

-----PNELG-----

>gi++|152971724|ref|YP\_001336833.1| propanediol utilization: dehydratase, large subunit [Klebsiella pneumoniae subsp. pneumoniae MGH 78578]

-----MRSKRFEALAKRPVNQDGFVKEWIEEGFIAMESPNDPKPS-IRIVNG  
AVTELDKDPVEQFDLIDHFIARYGINLARAEVMMAMDSVLANMLCDPNVKRSDIVPLTT  
AMTPAKIVEVVSMMNVVEMMMAMQKMRARRTPSQQAHVNTNIKDNVPVQIAADAAEGAWRGF  
DEQETTAVARYAPFNAIALLVGSQVGRPGVLTQCSLEEATELKLGLGHTCYAETISVY  
GTEPVFTDGDTPWSKGF LASSYASRGLKMRFTSGSGSEVQMGYAEGKSMLYLEARCIYI  
TKAAGVQGLQNGSVSCVGVPSAVPSGIRAVLAENLICSALDLECASSNDQTFTHSDMRRT  
ARLLMQFLPGTDFISSGYSVAVPNYDNMFAGSNEDAEDFDDYNVIQRDLKVDGGLRPVREE  
DVIAIRNKAARALQAVFAGMGLPPITDEEVEAATYAHGSKDMPERNIVEDIKFAQEIINK  
NRNGLEVVKALAKGGFPDVAQDMLNIQKAKLTGDYLHTSAIIVGEGQVLSAVNDVNDYAG  
PATGYRLQGER--WEEIKNIPGALD-----  
-----

-----PNELG-----

>gi++|161502796|ref|YP\_001569908.1| hypothetical protein SARI\_00847 [Salmonella enterica subsp. arizonae serovar 62:z4,z23:--]

-----MRSKRFEALAKRPVNQDGFVKEWIEEGFIAMESPNDPKPS-IKIVNG  
AVTELDGKPVSDFDLIDHFIARYGINLARAEVMMAMDSVLANMLCDPNVKRSDIVPLTT  
AMTPAKIVEVVSQMNVMEMMMAMQKMRARRTPSQQAHVNTNVKDNVPVQIAADAAEGAWRGF  
DEQETTAVARYAPFNAIALLVGSQVGRPGVLTQCSLEEATELKLGLGHTCYAETISVY  
GTEPVFTDGDTPWSKGF LASSYASRGLKMRFTSGSGSEVQMGYAEGKSMLYLEARCIYI  
TKAAGVQGLQNGSVSCVGVPSAVPSGIRAVLAENLICSALDLECASSNDQTFTHSDMRRT  
ARLLMQFLPGTDFISSGYSVAVPNYDNMFAGSNEDAEDFDDYNVIQRDLKVDGGLRPVREE  
DVIAIRNKAARALQAVFAGMGLPPITDEEVEAATYAHGSKDMPERNIVEDIKFAQDIINK  
NRNGLEVVKALAKGGFPDVAQDMLNIQKAKLTGDYLHTSAIIVGSGQVLSAVNDVNDYAG  
PATGYRLQGER--WEEIKNIPGALD-----  
-----

-----PNELG-----

>gi++|157157290|ref|YP\_001463342.1| propanediol utilization dehydratase, large subunit [Escherichia coli E24377A]

-----MRSKRFEALAKRPVNQDGFVKEWIEEGFIAMESPNDPKPS-IKIVNG  
VTELDGKPPASQFDLIDHFIARYGINLARAEVMIAMDSVLANMLCDPNVKRSDIVPLTT  
AMTPAKIVEVVSQMNVMEMMMAMQKMRARRTPSQQAHVNTNVKDNVPVQIAADAAEGAWRGF  
DEQETTAVARYAPFNAIALLVGSQVGRPGVLTQCSLEEATELKLGLGHTCYAETISVY  
GTEPVFTDGDTPWSKGF LASSYASRGLKMRFTSGSGSEVQMGYAEGKSMLYLEARCIYI  
TKAAGVQGLQNGSVSCVGVPSAVPSGIRAVLAENLICSALDLECASSNDQTFTHSDMRRT  
ARFLMQFLPGTDFISSGYSVAVPNYDNMFAGSNEDAEDFDDYNVIQRDLKVDGGLRPVREE  
DVIAIRNKAARALQAVFAGMGLPPITDEEVEAATYAHGSKDMPERNIVEDIKFAQEIINK  
NRNSLEVVKALAQGGFTDVAQDMLNMQKAKLTGDYLHTSAIIVDDGQVLSAVNDVNDYAG  
PATGYRLQGER--WEEIKNIPGALD-----  
-----

-----PNEID-----

>gi++|74312532|ref|YP\_310951.1| putative propanediol utilization protein: glycerol dehydratase large subunit [Shigella sonnei Ss046]

-----MRSKRFEALAKRPVNQDGFVKEWIEEGFIAMESPNDPKPS-IKIVNG  
VTELDGKPPASQFDLIDHFIARYGINLARAEVMIAMDSVLANMLCDPNVKRSDIVPLTT  
AMTPAKIVEVVSQMNVMEMMMAMQKMRARRTPSQQAHVNTNVKDNVPVQIAADAAEGAWRGF  
DEQETTAVARYAPFNAIALLVGSQVGRPGVLTQCSLEEATELKLGLGHTCYAETISVY  
GTEPVFTDGDTPWSKGF LASSYASRGLKMRFTSGSGSEVQMGYAEGKSMLYLEARCIYI  
TKAAGVQGLQNGSVSCVGVPSAVPSGIRAVLAENLICSALDLECASSNDQTFTHSDMRRT  
ARFLMQFLPGTDFISSGYSVAVPNYDNMFAGSNEDAEDFDDYNVIQRDLKVDGGLRPVREE

SupplementalMultipleSequenceAlign.txt

DVIAIRNKAARALQAVFAGMGLPPITDEEVEAATYAHGSKDMPERNIVEDIKFAQEIIINK  
NRNSLEVVKALAQQSFTDVAQDMLNMQKAKLTGDYLHTSAIIVDDGQVLSAVNDVNDYAG  
PATGYRLQGER--WEEIKNIPGALD-----

-----PNEID-----

>gi++|62180618|ref|YP\_217035.1| propanediol utilization: dehydratase, large subunit  
[Salmonella enterica subsp. enterica serovar Choleraesuis str. SC-B67]

-----MRSKRFEALAKRPVNQDGFVKEWIEEGFIAMESPNDPKPS-IKIVNG  
AVTELDGKPVSEFDLIDHFIARYGINLNRAEEVMAMDSIKLANMLCDPNVCRSEIVPLTT  
AMTPAKIVEVVSHMNVEEMMMAMQKMRARRTPSQQAHTNVKDNVPVQIAADAAEGAWRGF  
DEQETTAVARYAPFNAIALLVGSQVGRPGVLTQCSLEEATELKLGMGLGHTCYTETISVY  
GTEPVFTDGDTPWSKGFCLASSYASRGLKMRFTSGSGSEVQMGYAEGKSMLYLEARCIYI  
TKAAGVQGLQNGSVSCIGVPSAVPSGIRAVLAENLICSSLDLECASSNDQTFTHSDMRRT  
ARLLMQFLPGTDFISSGYSAPVNYDNMFAGSNEDAEDFDDYNVIQRDLKVDGGLRPVREE  
DVIAIRNKAARALQAVFAGMGLPPITDEEVEAATYAHGSKDMPERNIVEDIKFAQEIIINK  
NRNGLEVVKALAQQGFTDVAQDMLNIQKAKLTGDYLHTSAIIVGDGQVLSAVNDVNDYAG  
PATGYRLQGER--WEEIKNIPGALD-----

-----PNEID-----

>gi++|16765370|ref|NP\_460985.1| propanediol dehydratase large subunit [Salmonella  
typhimurium LT2]

-----MRSKRFEALAKRPVNQDGFVKEWIEEGFIAMESPNDPKPS-IKIVNG  
AVTELDGKPVSEFDLIDHFIARYGINLNRAEEVMAMDSVLANMLCDPNVCRSEIVPLTT  
AMTPAKIVEVVSHMNVEEMMMAMQKMRARRTPSQQAHTNVKDNVPVQIAADAAEGAWRGF  
DEQETTAVARYAPFNAIALLVGSQVGRPGVLTQCSLEEATELKLGMGLGHTCYAETISVY  
GTEPVFTDGDTPWSKGFCLASSYASRGLKMRFTSGSGSEVQMGYAEGKSMLYLEARCIYI  
TKAAGVQGLQNGSVSCIGVPSAVPSGIRAVLAENLICSSLDLECASSNDQTFTHSDMRRT  
ARLLMQFLPGTDFISSGYSAPVNYDNMFAGSNEDAEDFDDYNVIQRDLKVDGGLRPVREE  
DVIAIRNKAARALQAVFAGMGLPPITDEEVEAATYAHGSKDMPERNIVEDIKFAQEIIINK  
NRNGLEVVKALAQQGFTDVAQDMLNIQKAKLTGDYLHTSAIIVGDGQVLSAVNDVNDYAG  
PATGYRLQGER--WEEIKNIPGALD-----

-----PNEID-----

>gi++|16760973|ref|NP\_456590.1| glycerol dehydratase large subunit [Salmonella  
enterica subsp. enterica serovar Typhi str. CT18]

-----MRSKRFEALAKRPVNQDGFVKEWIEEGFIAMESPNDPKPS-IKIVNG  
AVTELDGKPVSEFDLIDHFIARYGINLNRAEEVMAMDSVLANMLCDPNVCRSEIVPLTT  
AMTPAKIVEVVSHMNVEEMMMAMQKMRARRTPSQQAHTNVKDNVPVQIAADAAEGAWRGF  
DEQETTAVARYAPFNAIALLVGSQVGRPGVLTQCSLEEATELKLGMGLGHTCYAETISVY  
GTEPVFTDGDTPWSKGFCLASSYASRGLKMRFTSGSGSEVQMGYAEGKSMLYLEARCIYI  
TKAAGVQGLQNGSVSCIGVPSAVPSGIRAVLAENLICSSLDLECSSNDQTFTHSDMRRT  
ARLLMQFLPGTDFISSGYSAPVNYDNMFAGSNEDAEDFDDYNVIQRDLKVDGGLRPVREE  
DVIAIRNKAARALQAVFAGMGLPPITDEEVEAATYAHGSKDMPERNIVEDIKFAQEIIINK  
NRNGLEVVKALAQQGFTDVAQDMLNIQKAKLTGDYLHTSAIIVGDGQVLSAVNDVNDYAG  
PATGYRLQGER--WEEIKNIPGALD-----

-----PNEID-----

>gi++|167040582|ref|YP\_001663567.1| glycerol dehydratase [Thermoanaerobacter sp.  
X514]

-----MRSKRFEVLAKRPVNQDGIIEAEWPEVGLIAVNSPNDPKPS-IKIENG  
KIVEMDGKKREEFDIEQFIADYAINIEMAEEKAMGMSLEIARMLVDINVPREEIVKIVS  
GLTPAKVVEVVNHLNVVEIMMAIQKMRARKRPGNQAHTNLRDNPVLIADAAEAALRGF  
DELETTVGITRYAPFNALALLVGSQTGRGGVLTQDALEESFELTIGMRGFTSYAETISVY  
GTEQVFDGDDTPWSKAFASAYASRGLKMRFTSGTGSECQMGFAEGKSMLYLEARCVMI  
AKGAGVQGLQNGSISICIGVPGAVPGGIRAVAAENLITMMEDLEVASGNDQTFSHSDIRRT  
ARTLLMLPGTDLIFSGYSAPVNYDNMFAGSNFDAEDFDDYLMQLRDLMEVGGVSPVTE  
EVIAVRNKAARALQSVFKLNLPPITDEEVEAATYAHGSKDMPPRDVNADLKAATELMEK  
GLTGLDVVKALAESGFTDAENVLNMLKQRIAGDYLQTSAVLDKDFNIDSAVNSNDYKGG  
PGTGFRLSKER--WERIKNVPQALK-----

SupplementalMultipleSequenceAlign.txt

-----PEDLA-----  
>gi++|153953477|ref|YP\_001394242.1| DhaA [Clostridium kluyveri DSM 555]  
-----MRRSERFEILEQRSIHKDGFEVEWPEIGLAAIESPNNPIPS-VKVEDG  
KIIEMDGKSREEFDLIDHFIARYGINLARAEVMMAMDSVLANMLCDPNVSRDEIIEITS  
SLTAAKLVEIISNLNVVEMMMALQKMKARRTPANQACVTNLRDNPVQIAADAADAALRGF  
AEMETRAGMLRYTLFNAISILIGSQTGRPGVLTQCSLEEATELKLGMRLTCTAETISVY  
GTESAFVEGDDTPWSKGFSLASAYTSRFGKMRFSISSIGSEVQMGYSEGKSMLYLEARCIIMM  
AKGTGVQGLQNGLVNGVGISAAVPEGMRAILGRSLIIEMLGLEVVSNEQVLTNSEIRKT  
SKAMLQFLPGVDFVSPGYNSTPSYDNMFTHSNWNAAEDYDDWLILQRDLRIDGGLKPVKEE  
KVIAVRNKAARAIQALFKELGLPSITDEEVEEAATYAHGSRDMPARNVEEDLKSIEKLLNK  
GITVLDIVKGLYSGGFADVAENILNMFKQRLIGDYLHQSSIFDEQYNVISAINDRNDYMG  
PGTGYRVEAKK--WDELKNNVFALE-----

-----PHKI-----  
>gi++|206575748|ref|YP\_002236782.1| propanediol utilization dehydratase, large subunit [Klebsiella pneumoniae 342]  
-----MRSKRFEALAKRPVNQDGFVKWEIEEGFIAMESPNDPKPS-IRIVNG  
AVTELDGKPVQFDLIDHFIARYGINLARAEVMMAMDSVLANMLCDPNVSRDIVPLTT  
AMTPAKIVEVVSMMNVVEMMMAMQKMRARRTPSQAHVTNIKDNPVQIAADAADAEGAWRGF  
DEQETTAVARYAPFNAIALLVGSQVGRPGVLTQCSLEEATELKLGMRLTCTAETISVY  
GTEPVFTDGGDDTPWSKGFSLASSYASRGLKMRFTSGSGSEVQMGYAEKKSMLYLEARCIYI  
TKAAGVQGLQNGSVSCIGVPSAVPSGIRAVLAENLICSALDLECASSNDQTFTHSDMRRT  
ARLLMQFLPGTDFISSGYSAPVNYDNMFAGSNEDAEDFDDYVNIQRDLKVDGGLRPVREE  
DVIAIRNKAARALQAVFAGMGLPPITDEEVEEAATYAHGSKDMPERNIVEDIKFAQEIIINK  
NRNGLEVVKALAKGGFPDVAQDMLNIQKAKLTGDYLTSAIIVGEGQVLSAVNDVNDYAG  
PATGYRLQGER--WEEIKNIPGALD-----

-----PNELG-----  
>gi++|148544953|ref|YP\_001272323.1| glycerol dehydratase [Lactobacillus reuteri DSM 20016]  
-----MKRQKRFEELKRPVNHQDTFVKWEPEEGFVAMMGPNDPKPS-VKVENG  
KIVEMDGKKLEDFDLIDLYIAKYGINIDNVEKVMNMDSTKIARMLVDPNVSDEIIEITS  
ALTPAKAEIISKLDGEMIMAVKMKRPRRKPNDQCHVTNTVDNPVQIAADAADAALRGF  
PEQETTAVARYAPFNAISILIGAQTGRPGVLTQCSVEEATELQLGMRGFTAYAETISVY  
GTDREVFTDGGDDTPWSKGFSLASCYASRGLKMRFTSGAGSEVLMGYPEGKSMLYLEARCILL  
TKASGVQGLQNGAVSCIEIPGAVPNGIREVLGENLLCMMCDIECASGCDQAYSHSDMRRT  
ERFIGQFIAGTDYINSYSSTPNYDNTFAGSNTDAMDYDDMYVMERDLGQYYGIHPVKEE  
TIIKARNKAAKALQAVFEDLGLPKITDEEVEEAATYANTHDDMPKRDMDVADMKAAQDMMDR  
GITAIDIKALYNHGFKDVAEAILNLQKQKVVGDYLTSSIFDKDWNVTSAVNDGNDYQG  
PGTGYRLYEDKEEWDRIKDLPFALD-----

-----PEHLEL-----  
>gi++|116872527|ref|YP\_849308.1| glycerol dehydratase large subunit [Listeria welshimeri serovar 6b str. SLCC5334]  
-----MKSkrFEELAKRPVNQDGFVKWEIEEGLIAMESPNDPKPS-IKIENG  
KVVEMDSKKLADFDLIDHFIARYGVDSLRAEEVMQMDSVLANMLCDPNVPREKIVLLTT  
AMTPAKIVEVVSQMNVMMSMQKMRSRRTPTTQAHVTNLRDNPVQIAADAADAALRGF  
DEQETTAVVRYAPFNALSLLVGSQTGRGGVLTQCSLEEATELELGMRLTCTAETISVY  
GTEPVFTDGGDDTPWSKGFSLASAYASRGLKMRFTSGTGSEVQMGYAEKKSMLYLESRCIFI  
TKAAGVQGLQNGSISCIIGIPGAVPSGIRAVLAENLIAVMLDLEVASGNDQTFSHSDIRRT  
ARLLMQFLPGTDFISSGYSATPNYDNMFAGSNFDADDYVNIQRDLKVDGGLTPVTEE  
EVAVRNKAARVIQVFEKLGPTVTDEEVEEAATYARGSNMPERNMVEDIKAAAEMMDR  
GVTGLDVVKALSAGGFDDVAESVLNMLKQRVSGDFLHTSAIIDKDNVVISSVNDLNDYAG  
PGTGYRLEGER--WEKLNIAVAVD-----

-----ANELD-----  
>gi++|116334196|ref|YP\_795723.1| propanediol dehydratase, large subunit  
Page 5

SupplementalMultipleSequenceAlign.txt

[Lactobacillus brevis ATCC 367]

-----MKRQKRFEELAKRPIHLDGFVKWEPEEGFVAMMGPNDPKPS-IKIENG  
KVTEMDSKPAADFDLIDLYIAKYGIKENAEKVMAMSTKIANMLCDPNVPRKDIEITT  
AMTPAKAEVVISKLNFAEMIMATQKMRPRRTPATQCHVTNIRDNPVQIAADAADAALRGF  
PEQETTTAVARYAPLNAISLMVGAQTGRPGVITQCSVEEAEELSLGMRGFTGYAETISVY  
GTDKVFDTGDDTPWSKGF LASCYASRGLKMRFTSGSGSEVMGYTEGKSMLYLESRCIFI  
TKASGVQGLQNGGVSCIGIPGSVPSGIRSVLGENLLCMMLDLECASANDQAFSHSDMRRT  
ERLLGQFIAGTDYISSGYSSTPNYDNTFAGSNTDGLDYDDYYVMERDLAINGGIHPVDEQ  
TIIKARNKAARALQGVFEDLGLPKITDEEVEEAATYANTSKDMPERNMVEDMKAAQDLMDR  
GITGVDIVKALFNHGFKDVAQAVLDLQKQKVCDFLQTS AIFDSKWHVISA VNDANDYQG  
PGTGYRLEEDTEEWERIKNLPFAID-----

-----PQNMQ-----

>gi++|16800186|ref|NP\_470454.1| hypothetical protein lin1117 [Listeria innocua  
Clp11262]

-----MKSKRFEELAKRPVNQDGFVKWEIEEGLIAMESPNDPKPS-IKIENG  
KVVEMDSKKLADFDLIDHFI AKYGV DLSRAEEVMKMDSVKLANMLCDPNVPREKIVLLTT  
AMTPAKIVEVVSQMNVEEMMSMQKMRSRRTPTTQAHVTNLRDNPVQIAADAAEAAIRGF  
DEQETTVAVVRYAPFNALSLLVGSQTGRGGVLTQCSLEEATELELGMRGLTCYAETISVY  
GTEPVFTDGDTPWSKGI L ASAYASRGLKMRFTSGTGSEVQMGYAEGKSMLYLESRCIFI  
TKAAGVQGLQNGSISCI GIPGAVPSGIRAVLAENLIAVMLDLEVASGNDQTFSHSDIRRT  
ARLLMQFLPGTDYISSGYSATPNYDNMFAGSNFDADD FDDYNILQRDLKVDGGLTPVTEE  
EVAVRNKAARVIQVVF DKLGLPAVTDEEVEEAATYARGSN DMPERNMVEDIKAAAEMMDR  
GVTGLDVVKAL AAGGFDDVAESVLNMLKQRVSGDFLHTSAIIDKDNVVISSVNDLNDYAG  
PGTGYRLEGER--WEKLDIAVAVD-----

-----ANELD-----

>gi++|46907371|ref|YP\_013760.1| glycerol dehydratase large subunit [Listeria  
monocytogenes str. 4b F2365]

-----MKSKRFEELAKRPVNQDGFVKWEIEEGLIAMESPNDPKPS-IKIENG  
KVVEMDSKKLADFDLIDHFI AKYGV DLSRAEEVMQMDSVKLANMLCDPNVPREKIVLLTT  
AMTPAKIVEVVSQMNVEEMMSMQKMRSRRTPTTQAHVTNLRDNPVQIAADAAEAAIRGF  
DEQETTVAVVRYAPFNALSLLVGSQTGRGGVLTQCSLEEATELELGMRGLTCYAETISVY  
GTEPVFTDGDTPWSKGI L ASAYASRGLKMRFTSGTGSEVQMGYAEGKSMLYLESRCIFI  
TKAAGVQGLQNGSISCI GIPGAVPSGIRAVLAENLIAVMLDLEVASGNDQTFSHSDIRRT  
ARLLMQFLPGTDYISSGYSATPNYDNMFAGSNFDADD FDDYNILQRDLKVDGGLTPVTEE  
EVAVRNKAARVIQAVFDKLGLPEVTDAEVEEAATYARGSKDMPERNMVEDIKAAAEMMDR  
GVTGLDVVKAL SAGGFDDVAESVLNMLKQRVSGDFLHTSAIIDKDNVVISSVNDLNDYAG  
PGTGYRLEGER--WEKLDIAVAVD-----

-----ANELE-----

>gi++|16803193|ref|NP\_464678.1| hypothetical protein lmo1153 [Listeria monocytogenes  
EGD-e]

-----MKSKRFEELAKRPVNQDGFVKWEIEEGLIAMESPNDPKPS-IKIENG  
KVVEMDSKKLADFDLIDHFI AKYGV DLSRAEEVMQMDSVKLANMLCDPNVPREKIVLLTT  
AMTPAKIVEVVSQMNVEEMMSMQKMRSRRTPTTQAHVTNLRDNPVQIAADAAEAAIRGF  
DEQETTVAVVRYAPFNALSLLVGSQTGRGGVLTQCSLEEATELELGMRGLTCYAETISVY  
GTEPVFTDGDTPWSKGI L ASAYASRGLKMRFTSGTGSEVQMGYAEGKSMLYLESRCIFI  
TKAAGVQGLQNGSISCI GIPGAVPSGIRAVLAENLIAVMLDLEVASGNDQTFSHSDIRRT  
ARLLMQFLPGTDYISSGYSATPNYDNMFAGSNFDADD FDDYNILQRDLKVDGGLTPVTEE  
EVAVRNKAARVIQAVFDKLGLPEVTDAEVEEAATYARGSKDMPERNMVEDIKAAAEMMDR  
GVTGLDVVKAL SAGGFDDVAESVLNMLKQRVSGDFLHTSAIIDKDNVVISSVNDLNDYAG  
PGTGYRLEGER--WEKLDIAVAVD-----

-----ANELD-----

>gi|187932789|ref|YP\_001886294.1| glycerol dehydratase large subunit [Clostridium  
botulinum B str. Eklund 17B]

-----MKSKRFQVLAKRPVNQDGLIGEWPEEGLVAMNSANDPKSS-IKIENG  
KVELDNKKREDFMIDRFIADYAINLENAEKAMSLDSVEIAKKLVDINVRDEIVNITT

SupplementalMultipleSequenceAlign.txt

SITPAKVVVEVSHMNVVEMMMALQKMRARKTPSNQCHVTNLKDNVPVQIAADAAEAGIRGF  
SEQETTGVIRYAPFNALAILIGSQVGRGGVLTQCSVEEATELDLGMGRGLT SYAETVSVY  
GTEAVFTDGGDDTPWSKAFLASAYASRGLKMRYS TGTGSEALMGYSEGKSMLYLESRCIYI  
TKGAGVQGLQNGAVSCIGMTGAVPSGIRAVLAENLIAAMLDIEVASANDQTF SHSDIRRT  
ARTLMQMLPGTDFIFSGYS AVPNYDNMFAGSNFDAEDFDDYNVLQRDL MVDGGLRPVSEE  
ETIAIRNKA AKSIQAVFRELGFPAITDEEVEEAATYAHGSKDMPERNIVEDLKAAE EMLKK  
RINGLDIVKALSTSGFDDVASNILNMLKQRVTGDY LQTSAILDNDFDVISAVNDKNDYMG  
PGTGYRISPER--WEEIKNIPNVIK-----

-----PEDID-----

>gi|188587878|ref|YP\_001921323.1| coenzyme B12-dependent glycerol dehydratase, large subunit [Clostridium botulinum E3 str. Alaska E43]

-----MKS KR FQVLAKRPVNQDGLIGEWPEEGLVAMNSANDPKSS-IKIENG  
TVVELDNKKREDFMIDRFIADYAINLKNAQKAMSLDSVEIARKLVDINVS RDEIVDITT  
SITPAKVVVEVSHMNVVEMMMALQKMRARKTPSNQCHVTNLKDNVPVQIAADAAEAGIRGF  
SEQETTGVIRYAPFNALAILIGSQVGRGGVLTQCSVEEATELDLGMGRGLT SYAETVSVY  
GTEAVFTDGGDDTPWSKAFLASAYASRGLKMRYS TGTGSEALMGYSEGKSMLYLESRCIYI  
TKGAGVQGLQNGAVSCIGMTGAVPSGIRAVLAENLIAAMLDIEVASANDQTF SHSDIRRT  
ARTLMQMLPGTDFIFSGYS AVPNYDNMFAGSNFDAEDFDDYNVLQRDL MVDGGLRPVSEE  
ETIAIRNKA AKAIQAVFRELDFPAITDEEVEEAATYAHGSKDMPERNIVEDLKAAE EMLKK  
RVSGLDIVKALSTGGFDDVAGNILNMLKQRVTGDY LQTSAILDNDFDVISAVNDKNDYMG  
PGTGYRISPER--WEEIKNIPNVIK-----

-----PEDIE-----

>gi|18309911|ref|NP\_561845.1| coenzyme B12-dependent glycerol dehydrogenase large subunit [Clostridium perfringens str. 13]

-----MKS KR FQVLSERPVNQDGLIGEWAD EGLIALDSPNDPKSS-IKIENG  
IITELDGRSRDEFDMIDKFIAEYAINIEDAEASMKLSSKEIARRLVDINVS RDEIVKITT  
SITPMKAVEVIQEMNVVEMMMALQKMRARRTPANQCHVTNVKDNVPVQIAADAAE AALRGF  
AEQETTGVIRYAPFNALAILVGSQVGRGGVLTQCAVEEATELDLGMGRGLT SYAETVSVY  
GTESVFTDGGDDTPWSKAFLASAYASRGLKMRFTSGSGSEALMGYSEGRSMLYLESRCIYI  
TKGAGVQGLQNGAVSCIGMTGAVPSGIRAVLGENLIAAMLDIEVASANDQTF SHSDIRRT  
ARMLMQMLPGTDFIFSGYS AVPNYDNMFAGSNFDAEDFDDYNILQRDLKVDGGLRPVTEE  
ETIKVRNKA AKCIQIIFRELGFPEVTDEEVEEAATYCHGSKEMPNNRVVEDLKAAE EMLER  
RITGLDIIKALSKNGMEDIANLLNMLKQRVTGDY LQTSAILDKDFNVISAVNDVNDYMG  
PGTGYRLDGQR--WEEIKKVPTVMR-----

-----PEDIE-----

>gi|152972005|ref|YP\_001337151.1| glycerol dehydratase [Klebsiella pneumoniae subsp. pneumoniae MGH 78578]

-----MKRSKRFAVLAQRPNVQDGLIGEWPEEGLIAMDSPFPDVSS-VKVDNG  
LIVELDGKRRDQFDMIDRFIADYAINVERTEQAMRLEAVEIARMLVDIHVS RREEIIAITT  
AITPAKAVEVMAQMN VVEMMMALQKMRARRTPSNQCHVTNLKDNVPVQIAADAAEAGIRGF  
SEQETTGVIRYAPFNALALLVGSQCGRPGVLTQCSVEEATELELGMGRGLT SYAETVSVY  
GTEAVFTDGGDDTPWSKAFLASAYASRGLKMRYS TGTGSEALMGYSESKSMLYLESRCIF I  
TKGAGVQGLQNGAVSCIGMTGAVPSGIRAVLAENLIASMLDLEVASANDQTF SHSDIRRT  
ARTLMQMLPGTDFIFSGYS AVPNYDNMFAGSNFDAEDFDDYNILQRDL MVDGGLRPVTEA  
ETIAIRQKAARAIQAVFRELGLPPIADEEVEEAATYAHGSNEMPPRN VVEDLSAVEEMMKR  
NITGLDIVGALSRSGFEDIASNILNMLRQRVTGDY LQTSAILDRQFEVVS AVNDINDYQG  
PGTGYRISAER--WAEIKNIPGVVQ-----

-----PDTIE-----

>gi|206579582|ref|YP\_002236501.1| glycerol dehydratase, large subunit [Klebsiella pneumoniae 342]

-----MKRSKRFAVLAQRPNVQDGLIGEWPEEGLIAMDSPFPDVSS-VKVDNG  
LIVELDGKRRDQFDMIDRFIADYAINVERTEQAMRLEAVEIARMLVDIHVS RREEIIAITT  
AITPAKAVEVMAQMN VVEMMMALQKMRARRTPSNQCHVTNLKDNVPVQIAADAAEAGIRGF  
SEQETTGVIRYAPFNALALLVGSQCGRPGVLTQCSVEEATELELGMGRGLT SYAETVSVY  
GTEAVFTDGGDDTPWSKAFLASAYASRGLKMRYS TGTGSEALMGYSESKSMLYLESRCIF I  
GTEAVFTDGGDDTPWSKAFLASAYASRGLKMRYS TGTGSEALMGYSESKSMLYLESRCIF I

SupplementalMultipleSequenceAlign.txt

TKGAGVQGLQNGAVSCIGMTGAVPSGIRAVLAENLIASMLDLEVASANDQTFSSHDIRRT  
ARTLMQMLPGTDFIFSGYSAVPNYDNMFAGSNFDAEDFDDYNILQRDLMVDGGLRPVTEA  
ETIAIRLKAARAIQAVFRELGLPPIADEEVEAATYAHGSNEMPPRRNVVDELSAVEEMMKR  
NITGLDIVGALSRSGFEDIASNILNMLRQRVTGDYLTSAILDRQFEVVS AVNDINDYQG  
PGTGYRISAER--WAEIKSIPGVVQ-----  
-----

-----PDTIE-----

>gi|118472362|ref|YP\_885929.1| glycerol dehydratase large subunit [Mycobacterium smegmatis str. MC2 155]

-MTTARNLGTEAKRQSERTKLLEERPVLNDGFSVQEWPEVGMVAMDSAFDPEPS-VRVENG  
VIVEMDGRARADDFDFIDQFIADHAIDVATTEQSMALPAVEIARMLVDPVTRDEVIQVAVTG  
GLTPAKLLEVAKNLNIIVEIMMGIQKMRARRTPANQAHCTSARDNPLQVACEAAEASLRGF  
SEVETTLGVVRYAPLVALQIGSQVSGGLLTQCALEEATELELGMRGITAYAETISVY  
GTESVFVDGDDTPWSKAFLLAAAYASRGIKMRFTSGTGSEVQMGNAEGRSMLYLEIRCIIV  
AKGAGVQGLQNGSISCIQVPGAVPAGIRAVAAENLIASAVDLECASGNDQSFHSPMRRT  
ARLLPQMLPGTDFVCSGYSAVPNYDNMFAGSNLDAEDFDDFNTIQRDLQVDGGLRHNVA  
EIVAARRRAAQALQAVFRYLDLPAITDAEIEAAVYAHGSRELI PRDVLEDLKGAAQVMDR  
NVTGLDLVKALESTGFADIAENLLAVLRQRVSGDLLQTSAIMTRDLKPLSAVNDNRNDYAG  
PGTGYRPSGAR--WEEMKRLRHVTS-----  
-----

-----AENPELEVE-----

>gi|118472557|ref|YP\_890539.1| glycerol dehydratase large subunit [Mycobacterium smegmatis str. MC2 155]

MVAVTESGDPGQSPQLGRMRILDAKPVNLDGFSVPDPLGLAAMSSPHDPQPS-LVIRDG  
RVVEMDGGKAAEDFDVIDEFIARYGLDLVAPEAMAMSDIDLARMAVDINVPRAEVRLIA  
GTTPAKLAKVIAVLPVEMQAAMAKMRARRTPSNQAHVTNQLDDPLLIAADAASAVAYGF  
REVETTVPVLDAPSNVALLIGSQVGVPGAMAQCSIEEAELELRLGLRGLT SYAETISIIY  
GTEQVFDGDDTPFSKAILTSAYASRGLKMRVTSGGGAEVLMGAAEKCSILYLESRCVSL  
ARALGSQGVQNGGIDGVGVVASVPDGMKELLAENLMVMMRDLESCAGNDNLISESDIRRS  
AHTLPVLLAGADDFIFSGFGSIPRYDNFALSNFNDDMDDFLVLRDWDGADGGLRTPAD  
QLAAVRRRAARAVQAVYRDLGLADFDDQHIENVVAANGSRDLPPGDPKAVLEAANAIEAK  
QLTVFDVVASLKRTGFDPEAEAIMRLTAERMGRDQLQTS AIFDEQFRVL SKITDPNDYAG  
PGTGYTLSEQR--RAEIDNIRQORSAAELTADQAEH----AGHITVTEIEPARQGS DPRE  
VCIGLSPALGRSVWLSLCLPIGEVIRQISAGLEEEGCVPRFVRVVRSTIDVGLIGLTA AK  
LAGSGIGIGLQGGKGTALIHRRDLAPLANLELFSVAPLLTARNYRELGRNAARHAKGMAPV  
PILTGGTDESISARYHARAVALVALERQASEPGEAPVTVEVRRP-----

>gi|126437898|ref|YP\_001073589.1| glycerol dehydratase [Mycobacterium sp. JLS]

-----MRILDAKPVNLDGFSVTDPALGLVAMHSPHDPQPS-LVV RDG  
RVVELDGRPAADFVIDEFIARYGIDLTVAAEAMALDDAVLARMVAVDNNVPRAEVRLIG  
GTTPAKLARVMVMTPVEMQMAMHKMRARRTPSNQAHVTNQLDDPLLIAADAASAVAYGF  
REVETTVPVFGDAPSNAIALIGSQVGVPGAMAQCSIEEAMELRLGLRGLT SYAETISIIY  
GTEQVFDGDDTPFSKAILTAAYASRGLKMRVTSGGGAEVLMGAAEKCSILYLESRCVSL  
ARALGSQGVQNGGIDGVGVVASVPEGMKELLAENLMVMMRDLESCAGNDNLISESDIRRS  
AHTLPVLLAGADDFIFSGFGSIPRYDNFALSNFNADDMDDFLVLRDWDGADGGLR TVSRE  
HLARVRRRAATAVQAVYRDLGLADFDDTRIDAVVVANDSRDL PAGDPKAVAE AATAIEAR  
QLTVFDVVAALHRTGYAPEAEAIMRLTRERLRGDQLQTS AIFDDQFQVL SKITDPNDYAG  
PGSGYTPTEKR--RAEIDGIRQARTSAELTADQAEH----RGHVVFSDVEPARQGS DPRE  
VCIGLSPALGRSVWLTCLGLTVGEVLRQLSAGLEEEGCVPRLVVRVVRSTIDVGLIGLTA AR  
LSGSGIGIGLQGGKGTALIHRRDLAPLANLELFSVAPLLTAKMYRELGRNAARHAKGMAPL  
PILAGGTDESISARYHARAVALVALERQACEPGQAPITVEAKRV-----

>gi|108801917|ref|YP\_642114.1| glycerol dehydratase [Mycobacterium sp. MCS]

-----MRILDAKPVNLDGFSVTDPALGLVAMHSPHDPQPS-LVV RDG  
RVVELDGRPAADFVIDEFIARYGIDLTVAAEAMALDDAVLARMVAVDNNVPRAEVRLIG  
GTTPAKLARVMVMTPVEMQMAMHKMRARRTPSNQAHVTNQLDDPLLIAADAASAVAYGF  
REVETTVPVFGDAPSNAIALIGSQVGVPGAMAQCSIEEAMELRLGLRGLT SYAETISIIY  
GTEQVFDGDDTPFSKAILTAAYASRGLKMRVTSGGGAEVLMGAAEKCSILYLESRCVSL  
ARALGSQGVQNGGIDGVGVVASVPEGMKELLAENLMVMMRDLESCAGNDNLISESDIRRS  
AHTLPVLLAGADDFIFSGFGSIPRYDNFALSNFNADDMDDFLVLRDWDGADGGLR TVSRE  
HLARVRRRAATAVQAVYRDLGLADFDDTRIDAVVVANDSRDL PAGDPKAVAE AATAIEAR  
QLTVFDVVAALHRTGYAPEAEAIMRLTRERLRGDQLQTS AIFDDQFQVL SKITDPNDYAG  
PGSGYTPTEKR--RAEIDGIRQARTSAELTADQAEH----RGHVVFSDVEPAHQGS DPRE



SupplementalMultipleSequenceAlign.txt

VCIGLSPALGRSVWLTLCGLTVGEVLRQLSAGLEEEGCVPRLVVRVSTIDVGLIGLTAAR  
LSGSGIGIGLQKGKGTALIHRRDLAPLANLELFSVAPLLTAKMYRELGRNAARHAKGMAPL

PILAGGTDESISARYHARAVLALERQACEPGQAPITVEAKRV----  
>gi|13475607|ref|NP\_107174.1| glycerol dehydratase large subunit [Mesorhizobium loti  
MAFF303099]

-----MTPKLNWRKRFADWDERPLRLDKFAAEDPANGFSAFSSPADPKPG-IGIKDG  
RVISLDGVLEHDYDMIDRFIARHHIDPEVAPEAMALDSATVARWLVDNVPRETLVRLAH  
GMTPAKLAEVVSQLNALEIAFAYSKMRARKTPGNQAHVTNAKDDPLQLAADAATAVAFGF  
DEIETTRVSRNAWSNAVACAVGGAVGRWGTLFQCSSEEAELRIAMAGFTSYAETVSVY  
GTEKSFDTGDDTPWSKAFLAAAYASRGVKMRCTSGAGSELLMGFHEAKSLLYLEARCLCL  
QRGMGVQGTQNGGIDGAPLTATIPGGVRELMAENLIAVWLDLECASGNDARSTESEIRVG  
AKILPYLIAGSDLICSGMGSILKYDNSFNPSLINGELEDYLVLQRDFEADGGLTPLPES  
RAIELRERAVEAIAAVFEELGLSSPTEDMKSSVVYASGSDDRSLMPRDVSFISEAIKER  
GITVIDVVKALAKRGFREEAENLLDVVKLRRLSGDYLQTSAMI-RNGRIVSAVNDPNDYLG  
PGSGYRVSEER--RLQNDIRVDLQKEVLRSEALHEKDEARHIRYRNLGPAANGSAKDD  
VVIGISPAFGLKLYRTTAGHRLSEVLGAMLDIAHARGLKARVVRFRHTADTSFLGLSAAR  
LAGSGIGIGIQAKGTAVIHQRDRQPHNLELFSNAPITRLEHYRALGANAAAYALGEMPE  
PVVVPQRGEAMGSRVHARVALIYAIETGLTEAGAAPEEVDVILTGVKS

>gi|118470012|ref|YP\_884909.1| glycerol dehydratase large subunit [Mycobacterium  
smegmatis str. MC2 155]

----MHLNSTEVD SRLGRIRLLDRQRVNLDFADVDAELGMISHLSPNDPEPSWVADDG  
TVLEMSDKPAEDFDTIDEFIVKYAIDHEQAAPRSMAMTDLDLARMIVDPGRPREEILRVCS  
GLTPAKMARVVASLQVVEIQMAMMKMRARRTPANQAHVTNRLLDDPLLIAADAATAVVYGF  
RELEATVPVLDAPAVAVGLLIGSQVPAPGALTQCSVEEARELELGVRLVSYAETVSVY  
GTEQVFTDGDTPWSKAFLTSCYASRGIKMRLSSGAGSEVLMGQAEGKSMNYLEARCVL  
ARGIGAQQVQNGGVDGAAITASVPGGVKELHAENLMVMLRGLSCSGNDSLMESESTMRRT  
SRTLPTLLSGSDFIFSGFGSVSYDNMFGPSNFNAADLDDYLVLQRDWGVDGGLRSVDPT  
TLESMRREAAEATRAVFEYLGADFDHVEAVVGAEGSKDLPQDDGVKVL SAARMIDQS  
GLTVL DIVSALAETGFTHIADRVLG MARARVTGDYLTAAIFDEEMNVL SALHDPNDYRG  
PGTYRPTPER--QAQIDAVRQARSVADLVKEQATS----AQPDLRLVLAATVGEDPRE  
VVIGVSPAFTGKLFRTLSGMTIYDVLEQILAGLEEEHCVPRLVRITDSIDLGAIGKSAAQ  
LSGSGIGVGLQAKGTTLIHRRDLPLLANLEL SVAPLITPEMYRLIGINAGRHAHGATPS  
PMRNAYTDEAITARYHTKVVSMAIEREESERRE-TGNVELEITR---

=====

%% PduD [targeting tail implicated]

>gi++|16765371|ref|NP\_460986.1| propanediol dehydratase medium subunit [Salmonella  
typhimurium LT2]

--MEINEKLLRQIIEDVLRDMK-GSDKPVSFNAPAASTAPQT----AAPAGD-----  
GFLTEVGEARQGTQQDEVIIAVGPAFGLAQTVNIVGLPHKSILREVIAGIEEEGIRARVI  
RCFKSSDVAFVAVEGNRLSGSGISIGIQSKGTTVIHQQLPPLSNLELFPQAPLLTLETY  
RQIGKNAARYAKRESPQVPVPTLNDQMARPKYQAKSAILHIKETYVVTGKNPQELRVAL-

>gi++|62180619|ref|YP\_217036.1| propanediol utilization: dehydratase, medium subunit  
[Salmonella enterica subsp. enterica serovar Choleraesuis str. SC-B67]

--MEINEKLLRQIIEDVLRDMK-GSDKPVSFNAPAASTAPQT----AAPAGD-----  
GFLTEVGEARQGTQQDEVIIAVGPAFGLAQTVNIVGLPHKSILREVIAGIEEEGIRARVI  
RCFKSSDVAFVAVEGNRLSGSGISIGIQSKGTTVIHQQLPPLSNLELFPQAPLLTLETY  
RQIGKNAARYAKRESPQVPVPTLNDQMARPKYQAKSAILHIKETYVVTGKNPQELRVAL-

>gi++|56413057|ref|YP\_150132.1| diol dehydratase medium subunit [Salmonella enterica  
subsp. enterica serovar Paratyphi A str. ATCC 9150]

--MEINEKLLRQIIEDVLRDMK-GSDKPVSFNTPAASTAPQT----AAPAGD-----  
GFLTEVGEARQGTQQDEVIIAVGPAFGLAQTVNIVGLPHKSILREVIAGIEEEGIRARVI  
RCFKSSDVAFVAVEGNRLSGSGISIGIQSKGTTVIHQQLPPLSNLELFPQAPLLTLETY  
RQIDKNAARYAKRESPQVPVPTLNDQMARPKYQAKSAILHIKETYVVTGKNPQELRVAL-

>gi++|16760974|ref|NP\_456591.1| diol dehydratase medium subunit [Salmonella enterica  
subsp. enterica serovar Typhi str. CT18]

--MEINEKLLRQIIEDVLRDMK-GSDKPVSFNTPAASTAPQT----QTAAPAGD-----  
GFLTEVGEARQGTQQDEVIIAVGPAFGLAQTVNIVGLPHKSILREVIAGIEEEGIRARVI  
RCFKSSDVAFVAVEGNRLSGSGISIGIQSKDTTVIHQQLPPLSNLELFPQAPLLTLETY

SupplementalMultipleSequenceAlign.txt

RQIGKNAARYAKRESPQPVPTLNDQMARPKYQAKSAILHIKETKYVVTGKNPQELRVTL-

>gi++|161502795|ref|YP\_001569907.1| hypothetical protein SARI\_00846 [Salmonella enterica subsp. arizonae serovar 62:z4,z23:--]

--MEINEKLLRQIIEDVLESEM-QSDTPVFSHAPSATAVA----QKAAPGGE-----  
SFLTEIGEAKQGTQQDEVIIAVGPAFGLSQTVNIVGLPHKSILREVIAGIEEEGIKARVI  
RCFKSSDVAFVAVEGNRLSGSGISIGIQSKGTTVIHQQLPPLSNLELFPQAPLLTLETY  
RQIGKNAARYAKRESPQPVPTLNDQMARPKYQAKSAILHIKETKYVVTGKNPQELRVTL-

>gi++|218549344|ref|YP\_002383135.1| Propanediol utilization: diol dehydratase, medium subunit [Escherichia fergusonii ATCC 35469]

--MEINEKLLRQIIIEQVLCSEM-QSDKPVSFQASTATA-----APAASD-----  
SFLTEIGEARQGTQQDEVIIAVGPAFGLSQTVNIVGLSHKSILREVIAGIEEEGIKARVI  
RCFKSSDVAFVAVEGNRLSGSGISIGIQSKGTTVIHQQLPPLSNLELFPQAPLLTLETY  
RQIGKNAARYAKRESPQPVPTLNDQMARPKYQAKSAILHIKETKYVVTGKNPQELRVTL-

>gi++|152971725|ref|YP\_001336834.1| propanediol utilization: dehydratase, medium subunit [Klebsiella pneumoniae subsp. pneumoniae MGH 78578]

--MEINETLLRQIIIEEVLSEMKGADKPVFSAPAAASVASAAPVAVAPVSGD-----  
SFLTEIGEAKPGTQQDEVIIAVGPAFGLAQTANIVGIPHKNILREVIAGIEEEGIKARVI  
RCFKSSDVAFVAVEGNRLSGSGISIGIQSKGTTVIHQQLPPLSNLELFPQAPLLTLETY  
RQIGKNAARYAKRESPQPVPTLNDQMARPKYQAKSAILHIKETKYVVTGKNPQELRVTL-

>gi++|218705534|ref|YP\_002413053.1| Propanediol utilization: diol dehydratase, medium subunit [Escherichia coli UMN026]

--MEINEKLLRQIIEDVLAEM-QSDKPVFSFRAPVSATAS-----SAPDTG-----  
NFLTEIGEAAQGTQQDEVIIAVGPAFGLAQTVNIIIGIPHKNILREVIAGIEEEGIKARVI  
RCFKSSDVAFVAVEGDRLSGSGIAIGIQSKGTTVIHQQLPPLSNLELFPQAPLLTLDY  
RQIGKNAARYAKRESPQPVPTLNDQMARPKYQAKSAILHIKETKYVVTGKPKQELRVTF-

>gi++|206580874|ref|YP\_002236781.1| propanediol utilization dehydratase, medium subunit [Klebsiella pneumoniae 342]

--MEINETLLRQIIIEEVLSEMKGADKPVFSAPAAASVASAAV---APVSSE-----  
SFLTEIGEAKPGTQQDEVIIAVGPAFGLAQTANIVGIPHKNILREVIAGIEEEGIKARVI  
RCFKSSDVAFVAVEGNRLSGSGISIGIQSKGTTVIHQQLPPLSNLELFPQAPLLTLETY  
RQIGKNAARYAKRESPQPVPTLNDQMARPKYQAKSAILHIKETKYVVTGKNPQELRMAL-

>gi++|215487214|ref|YP\_002329645.1| propanediol dehydratase, medium subunit, AdoCbl-dependent [Escherichia coli O127:H6 str. E2348/69]

--MEINEKLLRQIIEDVLAEM-QSDKSVSFRAPVSATVS-----SVPDTE-----  
NFLTEIGEAAQGTQQDEVIIAVGPAFGLAQTVNIIIGIPHKNILREVIAGIEEEGIKARVI  
RCFKSSDVAFVAVEGDRLSGSGIAIGIQSKGTTVIHQQLPPLSNLELFPQAPLLTLDY  
RQIGKNAARYAKRESPQPVPTLNDQMARPKYQAKSAILHIKETKYVVTGKPKQELRVTF-

>gi++|74312533|ref|YP\_310952.1| putative propanediol utilization protein: diol dehydratase medium subunit [Shigella sonnei Ss046]

--MEINEKLLRQIIEDVLAEM-QPSDKSVSFRAPVSATVP-----SAPDTG-----  
NFLTEIGEAAQGTQQDEVIIAVGPAFGLAQTVNIIIGIPHKNILREVIAGIEEEGIKARVI  
RCFKSSDVAFVAVEGDRLSGSGIAIGIQSKGTTVIHQQLPPLSNLELFPQAPLLTLDY  
RQIGKNAARYAKRESPQPVPTLNDQMARPKYQAKSAILHIKETKYVVTGKPKQELRVTF-

>gi++|157155485|ref|YP\_001463343.1| propanediol utilization dehydratase, medium subunit [Escherichia coli E24377A]

--MEINEKLLRQIIEDVLAEM-QPSDKSVSFRAPVSATVS-----SAPDTG-----  
NFLTEIGEAAQGTQQDEVIIAVGPAFGLAQTVNIIIGIPHKNILREVIAGIEEEGIKARVI  
RCFKSSDVAFVAVEGDRLSGSGIAIGIQSKGTTVIHQQLPPLSNLELFPQAPLLTLDY  
RQIGKNAARYAKRESPQPVPTLNDQMARPKYQAKSAILHIKETKYVVTGKPKQELRVTF-

>gi++|123442947|ref|YP\_001006922.1| putative propanediol utilization protein: dehydratase, medium subunit [Yersinia enterocolitica subsp. enterocolitica 8081]

--MVDINEKLLRQIIIEGVLQEM-QGDSNTVSFKQETQPTAT-----AAVASG-----  
DFLTEVGEARPGTHQDEVIIAVGPAFGLSQTANIVGIPHKNILRELIAGIEEEGIKARVI  
RCFKSSDVAFVAVEGNRLSGSGISIGIQSKGTTVIHQQLPPLSNLELFPQAPLLTLETY

SupplementalMultipleSequenceAlign.txt

RLIGKNAARYAKRESPQVPPTLNDQMARPKYQAKSAILHIKETKYVVTGKNPQELRVAL-

>gi++|116872528|ref|YP\_849309.1| propanediol utilization dehydratase, medium subunit [Listeria welshimeri serovar 6b str. SLCC5334]

-MVEINEKVL RGI ISEVLDELQ-LKEDKVSFQKEPSNPVVSDE-----  
SFLTEVGDAK PGRQKDEVVIAVAPAFGKYQTKNIVGVPHKQILREVIAGIEEEGLKARVV  
RVFRSSDVA FVAVEGDRLSGSGICIGIQSRGTALIHQKDLQPLSNLELFPQAPLITLETY  
RAIGKNAAKYAKGESPNPVMVNDQMARPKFQAKAALLHIKETKHVVQGKNAVELQVN--

>gi++|16800187|ref|NP\_470455.1| hypothetical protein lin1118 [Listeria innocua Clp11262]

-MVEINEKVL RGI ISEVLDELQ-LKEDKVSFQKEQPSVAVSDE-----  
SFLTEVGDAK PGRQKDEVVIAVAPAFGKYQTKNIVGVPHKQILREVIAGIEEEGLKARVV  
RVFRSSDVA FVAVEGDRLSGSGICIGIQSRGTALIHQKDLQPLSNLELFPQAPLITLETY  
RAIGKNAAKYAKGESPNPVMVNDQMARPKFQAKAALLHIKETKHVVQGKNAVELQVN--

>gi++|46907372|ref|YP\_013761.1| propanediol utilization: dehydratase, medium subunit [Listeria monocytogenes str. 4b F2365]

-MVEINEKVL RGI ISEVLDELQ-LKEDKVSFQKEQPSVAVSDE-----  
SFLTEVGDAEPGRQKDEVVIAVAPAFGKYQTKNIVGVPHKQILREVIAGIEEEGLKARVV  
RVFRSSDVA FVAVEGDRLSGSGICIGIQSRGTALIHQKDLQPLSNLELFPQAPLITLETY  
RAIGKNAAKYAKGESPNPVMVNDQMARPKFQAKAALLHIKETKHVVQGKNAVELQVN--

>gi++|16803194|ref|NP\_464679.1| hypothetical protein lmo1154 [Listeria monocytogenes EGD-e]

-MVEINEKVL RGI ISEVLDELQ-LKEDKVSFQKEQPSVAVSDE-----  
SFLTEVGDAEPGRQKDEVVIAVAPAFGKYQTKNIVGVPHKQILREVIAGIEEEGLKARVV  
RVFRSSDVA FVAVEGDRLSGSGICIGIQSRGTALIHQKDLQPLSNLELFPQAPLITLETY  
RAIGKNAAKYAKGESPNPVMVNDQMARPKFQAKAALLHIKETKHVVQGKNAVELQVN--

>gi++|125717398|ref|YP\_001034531.1| propanediol utilization: dehydratase, medium subunit, putative [Streptococcus sanguinis SK36]

-MTEINETLLRSIIAEVMKEMSANTKETAETSEKPVTKP-----VSNEK-----  
AVIRTVGVAKPSQSTDEVVIAVGPAPFGEQVKTMDIPHTEVLRQLVAGIEEEGLKARIV  
KVYRSDVA FVAVEGDHLSGSGISIGVQSKGTTVIHQKDLPLSNLELFPQAPLLTPETY  
RLIGKNAAKYAKGETPNPVPPTLNDQMARPKYQAYSALLHIKETKLVKRGKPADECQVI--

>gi++|148544952|ref|YP\_001272322.1| dehydratase, medium subunit [Lactobacillus reuteri DSM 20016]

-MADIDENLLRKIVKEVLSQTN-QIDTKIDFDKSNSTATATQEVQPPNSKA--VPEKKL  
DWFQPVGEAKPGYSKDEVVIAVGPAPFATVLDKTETGIPHKEVLRQVIAGIEEEGLKARVV  
KVYRSDVA FCAVQGDHLSGSGIAIGIQSKGTTVIHQKQDPLGNLELFPQAPVLTTPETY  
RAIGKNAAMYAKGESPEPVPKNDQLARIHYQAISAIMHIRETHQVVVVGKPEEEIKVTFD

>gi++|116334195|ref|YP\_795722.1| diol dehydratase medium subunit [Lactobacillus brevis ATCC 367]

MAQEIDENLLRNIIRDVIAETQ-TGDTPI SFKADAPAASSATTATAAPVNGDGPEPEKPV  
DWFKHVGVAKPGYSRDEVVIAVAPAFAEVMDHNL TGISHKEILRQMVAGIEEEGLKARIV  
KVYRTSDV SFCGAEGDHL SGSGIAIAIQSKGTTIIHQKQDEPLSNLELFPQAPVLDGDTY  
RAIGKNAAEYAKGMSPSPVPTVNDQMARVQYQALSALMHIKETKQVVMGKPAEQIEVNFN

>gi++|167040581|ref|YP\_001663566.1| dehydratase, medium subunit [Thermoanaerobacter sp. X514]

--MVKTESLVEQIVKEVLKLE-NVEIAAPATQSSDDANQEW-----  
MIIEEIGEAKQGVNDEVVIGVSPGFYIKFKKNIIGIPLGNILREIISGITEQGLKARIV  
RVKHTADV FIAHTAAKLSGSGIGIGIQSRGTVVIHQKDLQPLNLELFPQCPVLTLETY  
RAIGRNAALYAKGESPTVPVQNDQMARPKYQAI AAVMHN FETKYVQTGAKPVELKVSFA  
RKGGNKSDR

>gi++|218782819|ref|YP\_002434137.1| dehydratase medium subunit [Desulfatibacillum alkenivorans AK-01]

--MKLTEEMLRQIITEVVGMAGGAAAPAPA AVDTDKP-----  
LNFIEKGP AQAGSNPKDEVVAVPPGFGVTPTKTIIDIPH SVVLA EVAAGIEEEGLTARFV  
RNYQTADVA FLAHSAAQLSGSGVIGILSRGTSVIHQKDLAPLQNLLELFPQAPLVEAETF

SupplementalMultipleSequenceAlign.txt

RAIGKNAAKYAKGENPNPVPVKNDPMARPRYQGLAALLHNKEVQFLDPQKKILEVVQG--

>gi|188590348|ref|YP\_001921322.1| propanediol utilization: dehydratase, medium subunit [Clostridium botulinum E3 str. Alaska E43]

-----YVIPKLQ-----  
--LTEVGEAKVGTKVDEVVIGLAPAFLLKFQSKTLVNVSHSDILTEIIAGIEEEGLKARVV  
RVIRTSDFSISNDAAKLSGSGIGIGIQSKGTTVIHQKDLLPLNNLELFPQAPLLTLETY  
RLIGKNAAKYAKGESPTVPVTKNDQMVRPKFMAIAALFHIKETHKVEIGAKPIEIEVKF-

>gi|187933731|ref|YP\_001886293.1| propanediol utilization: dehydratase, medium subunit [Clostridium botulinum B str. Eklund 17B]

-----YVMPKLQ-----  
--LTEVGEAKVGTKVDEVVIGLAPAFLLKFQSKTLVNVSHSDILTEIIAGIEEEGLKARVV  
RVIRTSDFSISNDAAKLSGSGIGIGIQSKGTTVIHQKDLLPLNNLELFPQAPLLTLDY  
RLIGKNAAKYAKGESPTVPVTKNDQMVRPKFMAIAALFHIKETHKVEIGAKPIEIEVKF-

>gi|152972004|ref|YP\_001337150.1| glycerol dehydratase [Klebsiella pneumoniae subsp. pneumoniae MGH 78578]

-----MQTTQIQPSFT-----  
LKTREGGVASADERADEVVIGVPAFDKHHQHTLIDMPHGAILKELIAGVEEEGLHARVV  
RILRTSDVSFMAWDAANLSGSGIGIGIQSKGTTVIHQKDLLPLSNLELFSQAPLLTLETY  
RQIGKNAARYARKESPPVPPVNDQMVRPKFMAKAALFHIKETHKVVQDAEPVTLHVDLV  
RE-----

>gi|18309912|ref|NP\_561846.1| coenzyme B12-dependent glycerol dehydrogenase medium subunit [Clostridium perfringens str. 13]

-----TFIPEIT-----  
--VEEVGEAKVGLRSDEVVIGLAPAFLLKYQNKTIQVDPHTETLLEIIAGIEEEGLHARVV  
RILRTSDVSFIAHDAACLSGSGIGIGIQSKGTTVIHQKDLLPLNNLELFSQAPLLTTETY  
RLIGKNAAKYAKGESPTVPVVKNDQMVRPKFMAKAALLHIKETHKVEPGKPKVQLEVKF-

>gi|110802305|ref|YP\_698328.1| glycerol dehydratase, beta subunit [Clostridium perfringens SM101]

-----TFIPEIT-----  
--VEEVGEAKVGLRSDEVVIGLAPAFLLKYQNKTIQVDPHTETLLEIIAGIEEEGLHARVV  
RVLRTSDVSFIAHDAACLSGSGIGIGIQSKGTTVIHQKDLLPLNNLELFSQAPLLTPETY  
RLIGKNAAKYAKGESPTVPVVKNDQMVRPKFMAKAALLHIKETHKVEPGKPKVQLEVKF-

>gi|110800527|ref|YP\_695620.1| coenzyme B12-dependent glycerol dehydratase, medium subunit [Clostridium perfringens ATCC 13124]

-----TFIPEIT-----  
--VEEVGEAKVGLRSDEVVIGLAPAFLLKYQNKTIQVDPHTETLLEIIAGIEEEGLHARVV  
RILRTSDVSFIAHDAACLSGSGIGIGIQSKGTTVIHQKDLLPLNNLELFSQAPLLTPETY  
RLIGKNAAKYAKGESPTVPVVKNDQMVRPKFMAKAALLHIKETHKVEPGKPKVQLEVKF-

>gi|118467606|ref|YP\_885930.1| propanediol utilization: dehydratase, medium subunit [Mycobacterium smegmatis str. MC2 155]

-----MIMSASTQAQRTLE-----  
--LVGDSPAEPGKRSDEVVLA VSPAFADFFSQTIIIGLSHADVIREILAGIEEQEVHARCI  
RVRHSSDLAVLAHTAAKLSGSGIGIGILSRGTSMIHQKDLLPRLSSLELFPQSPLMTLETY  
RSIGSNAQYAKGESPEVPTLNDQMARPWRQAKAALLHLKETEQVVKQAKPVEVVPQFG  
VAEALGT--

=====  
%% PduE [targeting tail implicated]

>gi++|16765372|ref|NP\_460987.1| propanediol dehydratase small subunit [Salmonella typhimurium LT2]

-----MNTDAIESMVRDVL SRMNSLQGDAPAAAPAAGGTSRSKAV-  
---SDYPLANKHPEWVKATNKTLD DFTLE NVLSNKVTAQDMRITPETLRLQASIAKDAG  
RDRLAMNFERAAELTAVPDDRILEIYNALRPYRS-TKEELLA IADDLENRYQAKICAAFV  
REAAGLYVERKLLKGGD

>gi++|194446555|ref|YP\_002041309.1| propanediol dehydratase small subunit [Salmonella enterica subsp. enterica serovar Newport str. SL254]

SupplementalMultipleSequenceAlign.txt

```
-----MNTDAIESMVRDVL SRMNSLQGDAPAAASAAGGTSRSAKV-  
---SDYPLANKHPEWVK TATNKTLD DFTLE NVLSNKVTAQDMRITPETLRLQASIAKDAG  
RDRLAMNFERAAELTAVPDDRILEIYNALRPYRS-TKEELMAIADDLENRYQAKICAAAFV  
REAAGLYVERK K LK GDD  
>gi++|161613351|ref|YP_001587316.1| hypothetical protein SPAB_01062 [Salmonella  
enterica subsp. enterica serovar Paratyphi B str. SPB7]  
-----MNTDAIESMVRDVL SRMNSLQGDAPAAAPAAGGTSRSAKV-  
---SDYPLANKHPEWVK TATNKTLD DFTLE NVLSNKVTAQDMRITPETLRLQASIAKDAG  
RDRLAMNFERAAELTAVPDDRILEIYNALRPYRS-TKEELMAIADDLENRYQAKICAAAFV  
REAAGLYVERK K LK GDD  
>gi++|205353187|ref|YP_002226988.1| diol dehydratase small subunit [Salmonella  
enterica subsp. enterica serovar Gallinarum str. 287/91]  
-----MNTEAIESMVRDVL SRMNSLQGDAPAAAPAAGGTSRSAKV-  
---SDYPLANKHPEWVK TATNKTLD DFTLE NVLSNKVTAQDMRITPETLRLQASIAKDAG  
RDRLAMNFERAAELTAVPDDRILEIYNALRPYRS-TKEELLAIAADDLENRYQAKICAAAFV  
REAAGLYVERK K LK GDD  
>gi++|16760975|ref|NP_456592.1| diol dehydratase small subunit [Salmonella enterica  
subsp. enterica serovar Typhi str. CT18]  
-----MNTDAIESMVRDVL SRMNSLQGDAPAAAPAAGGTSRSAKV-  
---SDYPLANKHPEWVK TATNKTLD DFTLE NVLSNKVTAQDMRITPKTLRLQASIAKDAG  
RDRLAMNFERAAELTAVPDDRILEIYNALRPYRS-TKEELLAIAADDLENRYQAKICAAAFV  
REAAGLYVERK K LK GDD  
>gi++|56413056|ref|YP_150131.1| diol dehydratase small subunit [Salmonella enterica  
subsp. enterica serovar Paratyphi A str. ATCC 9150]  
-----MNIDAIESMVRDVL SRMNSLQGDAPAAAPAAGGTSRSAKV-  
---SDYPLANKHPEWVK TATNKTLD DFTLE NVLSNKVTAQDMRITPETLRLQASIAKDAG  
RDRLAMNFERAAELTAVPDDRILEIYNALRPYRS-TKEELLAIAADDLENRYQAKICAAAFV  
REAAGLYVERK K LK GDD  
>gi++|62180620|ref|YP_217037.1| propanediol utilization: dehydratase, small subunit  
[Salmonella enterica subsp. enterica serovar Choleraesuis str. SC-B67]  
-----MNTDAIESMVRDVL SRMNSLQGDAPAAASAAGGTSRSAKV-  
---SDYPLANKHPEWVK TATNKTLD DFTLE NVLSNKVTAQDMRITPETLRLQASIAKDAG  
RDRLAMNFERAAELTAVPDDRILEIYNALRPYRS-TKEELMAIADDLENRYQAKICAAAFV  
REAATLYVERK K LK GDD  
>gi++|161502794|ref|YP_001569906.1| hypothetical protein SARI_00845 [Salmonella  
enterica subsp. arizonae serovar 62:z4,z23:--]  
-----MNTEAIESMVRDVL SRMNSLQGQTSVSAAVGTSTHTAKV--  
---SDYPLANKHPEWVK TATNKTLD DFTLE NVLSDNVTAQDMRITPETLRIQAAIAKDAG  
RDRLAMNFERAAELTAVPDDRILEIYNALRPYRS-TKEELMAIADDLESRYQAKICAAAFV  
REAATLYVERK K LK GDD  
>gi++|218705535|ref|YP_002413054.1| Propanediol utilization diol dehydratase, small  
subunit [Escherichia coli UMN026]  
-----MNTDAIESMVRDVL NRMNSLQDAAPVSAVPSASIQSAKV--  
---TDYPLANKHPEWVK TATNKTLD DFTLE NVLSDNVTAQDMRITPETLRIQAAIARDAG  
RDRLAMNFERAAELTAVPDDRILEIYNALRPYRS-TKQELIAIADDLERRYQAKICAAAFV  
REAAELYVERK K LK GDD  
>gi++|215487215|ref|YP_002329646.1| propanediol dehydratase, small subunit,  
AdoCbl-dependent [Escherichia coli O127:H6 str. E2348/69]  
-----MNTDAIESMVRDVL NRMNSLQDAAPVSAVPSASIQSAKV--  
---TDYPLANKHPEWVK TATNKTLD DFTLE NVLSDNVTAQDMRITPETLRIQAAIARDAG  
RDRLAMNFERAAELTAVPDDRILEIYNALRPYRS-TKQELIAIADDLERRYQAKICAAAFV  
REAAELYVERK K LK GDD  
>gi++|218549345|ref|YP_002383136.1| Propanediol utilization diol dehydratase, small  
subunit [Escherichia fergusonii ATCC 35469]  
-----MNTDAIESMVRDVL SRMNSLEGAAPAPAPVTTTRGSAHHAKV  
---SDYPLATKHPEWVK TATNKTLD DLTLE NVLSDKITAQDMRITPETLRMQAAIAKDAG  
RDRLAMNFERAAELTAVPDDRILEIYNALRPYRS-TKEELLAIAADDLERRYQAVICAAAFV  
REAAALYLERK K LK GDD  
>gi++|206579980|ref|YP_002236780.1| propanediol utilization dehydratase, small  
subunit [Klebsiella pneumoniae 342]  
-----MNTDAIESMVRDVL SRMNSLQDGATPAPAAPTNDTARQPKV  
---SDYPLATRHPEWVK TATNKTLD DLTLE NVLSDRVTAQDMRITPETLRMQAAIAQDAG  
RDRLAMNFERAAELTAVPDDRILEIYNALRPYRS-TQAELLAIAADDLEHRYQARLCAAFV
```

SupplementalMultipleSequenceAlign.txt

REAAGLYVERKCLKGDD  
 >gi++|74312534|ref|YP\_310953.1| putative propanediol utilization protein: diol  
 dehydratase small subunit [Shigella sonnei Ss046]  
 -----MNTDAIESMVRDVLNRMNSLQDAAPVSAVNPASILSAKV--  
 ---TDYPLANKHPEWVKATNKTLDLFTLENVLSDNVTALDMRITPETLRIQAAIARDAG  
 RDRLAMNFERAAELTSPDDRILEIYNALRPYRS-TKQELIAIADDLEQRYQAKICAAAFV  
 REAAELYVERKCLKGDD  
 >gi++|152971726|ref|YP\_001336835.1| propanediol utilization: dehydratase, small  
 subunit [Klebsiella pneumoniae subsp. pneumoniae MGH 78578]  
 -----MNTDAIESMVRDVLNRMNSLQDGITPAPAAPTNDTVRQPKV  
 ---SDYPLATRHPEWVKATNKTLDLFTLENVLSDRVTAQDMRITPETLRMQAAIAQDAG  
 RDRLAMNFERAAELTAVPDDRILEIYNALRPYRS-TQAEELIAIADDLEHRYQARLCAAFV  
 REAAGLYIERKCLKGDD  
 >gi++|157156054|ref|YP\_001463344.1| propanediol utilization dehydratase, small  
 subunit [Escherichia coli E24377A]  
 -----MNTDAIESMVRDVLNRMNSLQDAAPVSAVNPASILSAKV--  
 ---TDYPLANKHPEWVKATNKTLDLFTLENVLSDNVTALDMRITPETLRIQAAIARDAG  
 CDRLAMNFERAAELTSPDDRILEIYNALRPYRS-TKQELIAIADDLEQRYQAKICAAAFV  
 REAAELYVERKCLKGDD  
 >gi++|123442948|ref|YP\_001006923.1| putative propanediol utilization protein:  
 dehydratase, small subunit [Yersinia enterocolitica subsp. enterocolitica 8081]  
 -----MNSEAIESMVRDVLNRMNSLQGGTPTTACAPAASSRSDAKV  
 ---SDYPLANKHPDWVKATNKTLDLFTLANVNLNGSVTSQDLRITPEILRIQASIADKAG  
 RPLLAMNFERAAELTAVPDDKVLDIYNALRPFRS-SKEELNAIADDLEQTYKATICAAAFV  
 REAAVLYVQRKCLKGDD  
 >gi++|16800188|ref|NP\_470456.1| hypothetical protein lin1119 [Listeria innocua  
 Clp11262]  
 -----MNQEALENMVRNILQEVNS--GAVTTTTTSQKASGDSLTV--  
 ---RDYPLGTRKPELVKTASSKSLDDITLKSVDLGTIKPEDVRVTAETLKMQAQVARDAG  
 RATLANNFERAAELTVVPERILEIYNAMRPYRS-SREELIAIADELENVYQATICSNYV  
 REAAQLYQERKCLKGDN  
 >gi++|116872529|ref|YP\_849310.1| propanediol utilization dehydratase, small subunit  
 [Listeria welshimeri serovar 6b str. SLCC5334]  
 -----MNQEALENMVRNILQEVNS--GAVSTTTTSQKVSQDGLTV--  
 ---RDYPLGKTRKPELVKTSTSKSLDDITLKSVDLGTIKPEDVRVTAETLKMQAQVARDAG  
 RATLANNFERAAELTIVPERILEIYNAMRPYRS-SKEELIAIADELESVYHATICSNYV  
 REAAQLYQERKCLKGDN  
 >gi++|46907373|ref|YP\_013762.1| propanediol utilization: dehydratase, small subunit  
 [Listeria monocytogenes str. 4b F2365]  
 -----MNQEALENMVRNILQEVNS--GAVSTTTTSQKVSQDGLTV--  
 ---RDYPLGTRKPELVKTSTSKSLDDITLKSVDLGTIKPEDVRVTAETLKMQAQVARDAG  
 RATLANNFERAAELTIVPERILEIYNAMRPYRS-SREELIAIADELESVYHATICSNYV  
 REAAQLYQERKCLKGDN  
 >gi++|16803195|ref|NP\_464680.1| hypothetical protein lmo1155 [Listeria monocytogenes  
 EGD-e]  
 -----MNQEALENMVRNILQEVNS--GGVSTTTTSQKVSQDGLTV--  
 ---RDYPLGTRKPELVKTSTSKSLDDITLKSVDLGTIKPEDVRVTAETLKMQAQVARDAG  
 RATLANNFERAAELTIVPERILEIYNAMRPYRS-SREELIAIADELESVYHATICSNYV  
 REAAQLYQERKCLKGDN  
 >gi++|125717399|ref|YP\_001034532.1| B12-dependent diol dehydratase small subunit,  
 putative [Streptococcus sanguinis SK36]  
 -----MSESVETLVKQILAELSDSGSASQGAVNRPVSSDEATA--  
 ---ADYPISSKHPDWIKVQDKKFEITLENILSGYVKAEDLRIKPEILIKQGEIAKNAG  
 REAIQYNFSRAAELTKVPDARVLEIYNALRPYRS-SKQELLDIANELENQYGAVICAGFV  
 REAAENYERRKCLKGDN  
 >gi++|167040580|ref|YP\_001663565.1| dehydratase, small subunit [Thermoanaerobacter  
 sp. x514]  
 -----MIDEKTLEIIVREVLNLTSDKGTQNNQKTASSSLPKLDPK-  
 ---RDYPLAKNKPELAKSITGKTINEITLQAVREGKVL PDDLKISPETLLAQAEIAEAAG  
 RKQLANNFRRAAELTKVPDKRILEIYNALRPYRS-TKEELIAIADELNAYGAKVCAAFV  
 REAAEVYERRGRCLKGME  
 >gi++|116334194|ref|YP\_795721.1| propanediol dehydratase, small subunit  
 [Lactobacillus brevis ATCC 367]

SupplementalMultipleSequenceAlign.txt

```
-----MSEIDDLVAKIVQQIGGTEAADQTTATPTSTATQTQHAA
LSKQDYPLYSKHPELVHSPSGKALNDITLDNVLNDDIKANDLRITPDTLRMQGEVANDAG
RDAVQRNFQRASELTSIPDDRLEMYNALRPYRS-TKAELLAISAEKDKYHAPVNAGWF
AEAADYYESRKKLKGDN
>gi++|219854100|ref|YP_002471222.1| hypothetical protein CKR_0757 [Clostridium
kluuyveri NBRC 12016]
-----MNRGEAMSSNDLIEQIVKEVLKSMESIQNDEQKYESEEEIHGSGRACEI
VSKKDYPLGKKRPELIKSTGKSIDDISLENVLSGKITLDDVKINKKTLTYQAQIAESVG
NIQLAANFRRAAELTVVPDARVLEIYNALKPHKS-TKQQLIEIAEELSKYKAKLNAELV
REAESYEKRNMIKV--
>gi++|153953478|ref|YP_001394243.1| DhaC [Clostridium kluuyveri DSM 555]
-----MSSNDLIEQIVKEVLKSMESIQNDEQKYESEEEIHGSGRACEI
VSKKDYPLGKKRPELIKSTGKSIDDISLENVLSGKITLDDVKINKKTLTYQAQIAESVG
NIQLAANFRRAAELTVVPDARVLEIYNALKPHKS-TKQQLIEIAEELSKYKAKLNAELV
REAESYEKRNMIKV--
>gi++|184154288|ref|YP_001842629.1| glycerol dehydratase small subunit PduE
[Lactobacillus reuteri JCM 1112]
-----MSEVDDLVAKIMAQMGNSSANSSTGTSTASTSKEMTA-
---DDYPLYQKHRDLVKTPKGHNLDLQKVVNNQVDPKELRITPEALKLQGEIAANAG
RPAIQKNLQRAAELTRVPDERVLEMYDALRPFPS-TKQELLNIAKELRDKYDANVCAAWF
EEAADYYESRKKLKGDN
>gi++|148544951|ref|YP_001272321.1| dehydratase, small subunit [Lactobacillus
reuteri DSM 20016]
-----MMSEVDDLVAKIMAQMGNSSANSSTGTSTASTSKEMTA-
---DDYPLYQKHRDLVKTPKGHNLDLQKVVNNQVDPKELRITPEALKLQGEIAANAG
RPAIQKNLQRAAELTRVPDERVLEMYDALRPFPS-TKQELLNIAKELRDKYDANVCAAWF
EEAADYYESRKKLKGDN
>gi++|218782818|ref|YP_002434136.1| dehydratase small subunit [Desulfatibacillum
alkenivorans AK-01]
MVSFTKQDIADIIRKVGDTSPAELESVRNVLAKLQS-----EGLSAPASQGGKLD--
---SSYPLGIKRKDLVKSATGLGLDDITIEKVVSGEIQFDDIKTRPETLAYQNEIAKSVN
RPNLANNLARAGEMTRIPDARLLEMYNFLRPYRA-AKQEMISMAEELQKYQAPACAKLV
REAADVYEKNNRLKGDR
>gi|187933430|ref|YP_001886292.1| coenzyme B12-dependent glycerol dehydratase, small
subunit [Clostridium botulinum B str. Eklund 17B]
-----MEQRKMNP--
---QDYPLATKRPESIKPTGKNLQDITLENVLKGDIKAEDVRISPETLEMQAQIAEGMK
RDAIARNFRRAAELIKVPDDRILEIYNALRPYRS-TKEDLLAIAEELTVYGAKVNADFV
REAIEVYEARQKLRQE-
>gi|188590615|ref|YP_001921321.1| coenzyme B12-dependent glycerol dehydratase, small
subunit [Clostridium botulinum E3 str. Alaska E43]
-----MEQRKMNP--
---QDYPLATKRPESIKPTGKNLQDITLENVLKGDIKAEDVRISPETLEMQAQIAEGMK
RDAIARNFRRAAELIKVPDDRILEIYNALRPNRS-TKEELFAIADELETVYGAKVNADFV
REAIEVYEARQKLRQE-
>gi|110802854|ref|YP_698329.1| glycerol dehydrase, gamma subunit [Clostridium
perfringens SM101]
-----MENKRMTA--
---ADYPLTSKRKGDIKPTGKALEDITLEKVLSGEINADDIRISPETLEMQAQIAESMN
RDAIARNFRRAAELIRVPDDRILEMYNALRPYRS-TKEDLFKIADELETKYDAKVNANFV
REAAEVYETRNLRIEE
>gi|18309913|ref|NP_561847.1| coenzyme B12-dependent glycerol dehydrogenase small
subunit [Clostridium perfringens str. 13]
-----MENKRMTA--
---ADYPLTSKRKGDIKPTGKALEDITLEKVLSGEINADDIRISPETLEMQAQIAESMN
RDAIARNFRRAAELIRVPDDRILEMYNALRPYRS-TKEDLFKIADELETKYDAKVNANFV
REAAEVYETRNLRIEE
>gi|152972003|ref|YP_001337149.1| glycerol dehydratase [Klebsiella pneumoniae subsp.
pneumoniae MGH 78578]
-----MSEKTMRV--
---QDYPLATRCPEHILTPTGKPLTDITLEKVLSGEVGPQDVIRISQRTLEYQAQIAEQMQ
RHAVARNFRRAAELIAIPDERILAIYNALRPFPS-SQAELLAIADELEHTWHATVNAAFV
RESAEVYQQRHKLKRG
```

SupplementalMultipleSequenceAlign.txt

```
>gi|118472086|ref|YP_885928.1| coenzyme B12-dependent glycerol dehydrogenase small
subunit [Mycobacterium smegmatis str. MC2 155]
-----MSEPVLDPA-
---VDYPLSLNRKDLLTTPNGKPIDAITMDAVMSGEVSASDLRITPETLRLQAQIAEGVG
RKQLGANLRRAAEMTAISDERVLQIYNALRPNAS-TKAELDAIAELETQYGATMLAGLV
REAADVYERRDILATSE
>gi|13475606|ref|NP_107173.1| glycerol dehydratase small subunit [Mesorhizobium loti
MAFF303099]
-----MTHTR-----
---ADYPLAETQPGAVKGRGKSLAEITLDSVLAGDVTMEDLRITPQALQAQADVARDVG
RPTLALNFERGAELVEVPQDFIMQVYELLRPGRAKSKEELLQAATTMRDITYQAERIRFI
EEAAETYAARGLFTFRF
>gi|118469461|ref|YP_890538.1| diol dehydrase gamma subunit [Mycobacterium smegmatis
str. MC2 155]
-----
-----MNDKFTDKYTVAAAVDVGKLDLSDLRMDPAVLAHQAVIAEENG
NPQLAENFLRAAELATIDDEDVMRLYEALRPYRS-SAEIDLALQASLESR-GAARCAELV
RQAAEAYARRGLLR---
>gi|118468095|ref|YP_884908.1| coenzyme B12-dependent glycerol dehydrogenase small
subunit [Mycobacterium smegmatis str. MC2 155]
-----
-----MTITSHSGRSIDEVTVEAARGGDLTDDIRISRDTLISQAEAAERTG
SEQLGLNLRRAAELTALSSDDMLAAYEALRPGRS-TFSELEALQRLAAQ-EAHTCAQLV
REAAAAYRRRGLLR---
>gi|126437897|ref|YP_001073588.1| dehydratase, small subunit [Mycobacterium sp. JLS]
-----
-----MTEKFTVAAAVDVGKLTLSDLRMDPATLAYQAVVAEQDG
NPQLAENFLRAAELAVIDDEAVMKLYEALRPHRS-TAAELEELRVSLLETG-GASRCAELV
RQAAEVYARRGLLR---
>gi|108801916|ref|YP_642113.1| propanediol utilization: dehydratase, small subunit
[Mycobacterium sp. MCS]
-----
-----MTEKFTVAAAVDVGKLTLSDLRMDPATLAYQAVVAEQDG
NPQLAENFLRAAELAVIDDEAVMKFYEALRPHRS-TAAELEELRVSLLETG-GASRCAELV
RQAAEVYARRGLLR---
```

=====  
%% PduG [targeting tail not implicated]

```
>gi++|16765373|ref|NP_460988.1| propanediol dehydratase reactivation protein
[Salmonella typhimurium LT2]
----MRYIAGIDIGNSSTEVALARQDETGALTITHSALAETTGIKGLTRNVFGIQEALAL
VAKRAGINVRDISLRINEATPVIGDVAMETITETIITESTMIGHNPKTPGGAGLGVGIT
ITPEELLTR-PADSS-----YILVSSAFDFADIANVINASMRAGYQITGVILQRDDGV
LVSNRLEKSLPIVDEVLYIDRIPLGMLAAIEVAVPGKVIETLSNPYGIATVFNLNADETK
NIVPMARALIGNRSVVVKTPSGDVKARAI PAGNLELQAQGRVTRVDVAAGAEAIMKA VD
GCGKLDNVTGEAGTNIGGML EHV RQTMAELTNKPSSEIFIQDLLAVDTSVPVSVTGGLAG
EFSLEQAVGIAS MVKSDRLQMAMIAREIEQKLNIDVQIGGAEAEAA I LGAL TTPGTT RPL
AILD LGAGST DASIINPKGEIIATHLAGAGDMVTMI IARELGLED RYLAEEIKKYPLAKV
ESLFHLRHEDGSVQFFPTPLPAVFAVRCVVKP-DELVPL-PGDLALEKVRAIRRS AKER
VFVTNALRALRQVSP TGNIRDIPFVVLVGGSSLD FEVPQLVTDALAHYRLVAGRGNIRGS
EGPRNAVATGLILS-----WHKE----FAHGQ-
>gi++|207857478|ref|YP_002244129.1| propanediol utilization protein [Salmonella
enterica subsp. enterica serovar Enteritidis str. P125109]
----MRYIAGIDIGNSSTEVALARQDETGALTITHSALAETTGIKGLTRNVFGIQEALAL
VAKRAGINVS DISLRINEATPVIGDVAMETITETIITESTMIGHNPKTPGGAGLGVGIT
ITPEELLTR-PADSS-----YILVSSAFDFADIANVINASMRAGYQITGVILQRDDGV
LVS NRLEKSLPIVDEVLYIDRIPLGMLAAIEVAVPGKVIETLSNPYGIATVFNLNADETK
NIVPMARALIGNRSVVVKTPSGDVKARAI PAGNLELQAQGRVTRVDVAAGAEAIMKA VD
GCGKLDNVTGEAGTNIGGML EHV RQTMAELTNKPSSEIFIQDLLAVDTSVPVSVTGGLAG
EFSLEQAVGIAS MVKSDRLQMAMIAREIEQKLNIDVQIGGAEAEAA I LGAL TTPGTT RPL
AILD LGAGST DASIINPKGEIIATHLAGAGDMVTMI IARELGLED RYLAEEIKKYPLAKV
ESLFHLRHEDGSVQFFPTPLPAVFAVRCVVKP-DELVPL-PGDLALEKVRAIRRS AKER
```



SupplementalMultipleSequenceAlign.txt

VFVTNALRALRQVSPTGNIRDIPFVVLVGGSSLD FEVPQLVTDALAHYRLVAGRGNIRGS  
EGPRNAVATGLILS-----WHKE----FAHGQ-  
>gi++|198242248|ref|YP\_002216128.1| glycerol dehydratase reactivation factor large  
subunit [Salmonella enterica subsp. enterica serovar Dublin str. CT\_02021853]  
----MRYIAGIDIGNSSTEVALARQDETGALTITHSALAETTGIKGLTRNVFGIQEALAL  
VAKRAGINVSDISLIRINEATPVIGDVAMETITETIITESTMIGHNPKTPGGAGLVGKIT  
IRPEELLTR-PADSS-----YILVSSAFDFADIANVINASMRAGYQITGVILQRDDGV  
LVSNRLEKSLPIVDEVLYIDRIPLGMLAAIEVAVPGKVIETLSNPYGIATVFNLNADETK  
NIVPMARALIGNRSVAVVKTPSGDVKARAI PAGNLELQAQGRVTRVDVAAGAEAIMKAVD  
GCGKLDNVTGEAGTNIGGML EHVQR TMAELTNKPSSEIFIQDLLAVDTSVPVSVTGGLAG  
EFSLEQAVGSIASMVKSDRLQMAMIAREIEQKLNIDVQIGGAEAEAAAILGALTTTPGTRPL  
AILDLAGAGSTDASIINPKGEIIATHLAGAGDMVTMIIARELGLED RYLAEEIKKYPLAKV  
ESLFHLRHEDG SVQFFPTPLPPAVFARVCVVKP-DELVPL-PGDLALEKVR AIRR SAKER  
VFVTNALRALRQVSPTGNIRDIPFVVLVGGSSLD FEVPQLVTDALAHYRLVAGRGNIRGS  
EGPRNAVATGLILS-----WHKE----FAHGQ-  
>gi++|197247884|ref|YP\_002147000.1| glycerol dehydratase reactivation factor large  
subunit [Salmonella enterica subsp. enterica serovar Agona str. SL483]  
----MRYIAGIDIGNSSTEVALARQDEAGALTITHSALAETTGIKGLTRNVFGIQEALAL  
VAKRAGINVSDISLIRINEATPVIGDVAMETITETIITESTMIGHNPKTPGGAGLVGKIT  
ITPEELLTR-PADSS-----YILVSSAFDFADIANVINASMRAGYQITGVILQRDDGV  
LVSNRLEKSLPIVDEVLYIDRIPLGMLAAIEVAVPGKVIETLSNPYGIATVFNLNADETK  
NIVPMARALIGNRSVAVVKTPSGDVKARAI PAGNLELQAQGRVTRVDVAAGAEAIMKAVD  
GCGKLDNVTGEAGTNIGGML EHVQR TMAELTNKPSSEVFIQDLLAVDTSVPVSVTGGLAG  
EFSLEQAVGSIASMVKSDRLQMAMIAREIEQKLNIDVQIGGAEAEAAAILGALTTTPGTRPL  
AILDLAGAGSTDASIINPKGKIIATHLAGAGDMVTMIIARELGLED RYLAEEIKKYPLAKV  
ESLFHLRHEDG SVQFFPTPLPPAVFARVCVVKP-DELVPL-PGDLALEKVR AIRR SAKER  
VFVTNALRALRQVSPTGNIRDIPFVVLVGGSSLD FEVPQLVTDALAHYRLVAGRGNIRGS  
EGPRNAVATGLILS-----WHKE----FAHGQ-  
>gi++|62180621|ref|YP\_217038.1| propanediol utilization: diol dehydratase  
reactivation [Salmonella enterica subsp. enterica serovar Choleraesuis str. SC-B67]  
----MRYIAGIDIGNSSTEVALARQDETGALTITHSALAETTGIKGLTRNVFGIQEALAL  
VAKRAGINVSDISLIRINEATPVIGDVAMETITETIITESTMIGHNPKTPGGVGLVGVKIT  
ITPEELLTR-PADSS-----YILVSSAFDFADIANVINASMRAGYQITGVILQRDDGV  
LVSNRLEKSLPIVDEVLYIDRIPLGMLAAIEVAVPGKVIETLSNPYGIATVFNLNADETK  
NIVPMARALIGNRSVAVVKTPSGDVKARAI PAGNLELQAQGRVTRVDVAAGAEAIMKAVD  
GCGKLDNVTGEAGTNIGGML EHVQR TMAELTNKPSSEIFIQDLLAVDTSVPVSVTGGLAG  
EFSLEQAVGSIASMVKSDRLQMAMIIAREIEQKLNIDVQIGGAEAEAAAILGALTTTPGTRPL  
AILDLAGAGSTDASIINPKGEIIATHLAGAGDMVTMIIARELGLED RYLAEEIKKYPLAKV  
ESLFHLRHEDG SVQFFPTPLPPAVFARVCVVKP-DELVPL-PGDLALEKVR AIRR SAKER  
VFVTNALRALRQVSPTGNIRDIPFVVLVGGSSLD FEVPQLVTDALAHYRLVAGRGNIRGS  
EGPRNAVATGLILS-----WHKE----FAYGQ-  
>gi++|56413055|ref|YP\_150130.1| PduG protein [Salmonella enterica subsp. enterica  
serovar Paratyphi A str. ATCC 9150]  
----MRYIAGIDIGNSSTEVALARQDETGALTITHSALAETTGIKGLTRNVFGIQEALAL  
VAKRAGINVSDISLIRINEATPVIGDVAMETITETIITESTMIGHNPKTPGGAGLVGKIT  
ITPEELLTR-PADSS-----YILVSSAFDFADIANVINASMRAGYQITGVILQRDDGV  
LVSNRLEKSLPIVDEVLYIDRIPLGMLAAIEVAVPGKVIETLSNPYGIATVFNLNADETK  
NIVPMARALIGNRSVAVVKTPSGDVKARAI PAGNLELQAQGRVTRVDVAAGAEAIMKAVD  
GYGKLDNVNGEAGTNIGGML EHVQR TMAELTNKPSSEIFIQDLLAVDTSVPVSVTGGLAG  
EFSLEQAVGSIASMVKSDRLQMAMIAREIEQKLNIDVQIGGAEAEAAAILGALTTTPGTRPL  
AILDLAGAGSTDASIINPKGEIIATHLAGAGDMVTMIIARELGLED RYLAEEIKKYPLAKV  
ESLFHLCHEDG SVQFFPTPLPPAVFARVCVVKP-DELVPL-PGDLALEKVR AIRR SAKER  
VFVTNALRALRQVSPTGNIRDIPFVVLVGGSSLD FEVPQLVTDALAHYRLVAGRGNIRGS  
EGPRNAVATGLILS-----WHKE----FAHGQ-  
>gi++|16760976|ref|NP\_456593.1| PduG protein [Salmonella enterica subsp. enterica  
serovar Typhi str. CT18]  
----MRYIAGIDIGNSSTEVALARQDETGALTITHSALAENTGIKGLTRNVFGIQEALAL  
VAKRAGINVSDISLIRINEATPVIGDVAMETITETIITESTMIGHNPKTPGGAGLVGKIT  
ITPEELLTR-PADSS-----YILVSSAFDFADIANVINASMRAGYQITGVILQRDDGV  
LVSNRLEKSLPIVDEVLYIDCIPLGMLAAIEVAVPGKVIETLSNPYGIATVFNLNADETK  
NIVPMARALIGNRSVAVVKTPSGDVKARAI PAGNLELQAQGRVTRVDVAAGAEAIMKAVD  
GYGKLDNVNGEAGTNIGGML EHVQR TMAELTNKPSSEIFIQDLLAVDTSVPVSVTGGLAG  
EFSLEQAVGSIASMVKSDRLQMAMIAREIEQKLNIDVQIGGAEAEAAAILGALTTTPGTRPL

SupplementalMultipleSequenceAlign.txt

AILDLAGSTDASIINPKGEIIATHLAGAGDMVTMIIARELGLEDRLAEEIKKYPLAKV  
ESLFHLRHEDGVSQFFPTPLPPAVFARVCVVKP-DELVPL-PGDLALEKVRAIRRSAKER  
VFVTNLRALRQVSPTGNIRDIPFVVLVGGSSLD FEVPQLVTDALAHYRLVAGRGNIRGS  
EGPRNAVATGLILS-----WHKE-----FAYGQ-  
>gi++|161613350|ref|YP\_001587315.1| hypothetical protein SPAB\_01061 [Salmonella  
enterica subsp. enterica serovar Paratyphi B str. SPB7]  
----MRYIAGIDIGNSSTEVALATLNEAGALTITHSALAETTGIKGLTRNVFGIQEALAL  
VAKRAGINVS DISLIRINEATPVIGDVAMETITETIITESTMIGHNPKTPGGVGLGVGIT  
ITPEELLTR-PADSS-----YILVSSAFDFADIANVINASMRAGYQITGVILQRDDGV  
LVS NRLEKSLPIVDEVLYIDRIPLGMLAAIEVAVPGKVIETLSNPYGIATVFNLNADETK  
NIVPMARALIGNRS AVVVKTPSGDVKARAI PAGNLELQAQGRTRVDVAAGAEAIMKA VD  
GFGKLDNVTGEAGTNIGGML EHV RQTMAELTNKPSSEIFIQDLLAVDTSVPVSVTGGLAG  
EFSLEQAVGIAS MVKSDRLQMAMIAREIEQKLNIDVQIGGAEAEAA ILGAL TTPGTTRPL  
AILDLAGSTDASIINPKGEIIATHLAGAGDMVTMIIARELGLEDRLAEEIKKYPLAKV  
ESLFHLRHEDGVSQFFPTPLPPAVFARVCVVKP-DELVPL-PGDLALEKVRAIRRSAKER  
VFVTNLRALRQVSPTGNIRDIPFVVLVGGSSLD FEVPQLVTDALAHYRLVAGRGNIRGS  
EGPRNAVATGLILS-----WHKE-----FAYGQ-  
>gi++|161502793|ref|YP\_001569905.1| hypothetical protein SARI\_00844 [Salmonella  
enterica subsp. arizonae serovar 62:z4,z23:--]  
----MQYIAGIDIGNSSTEVALAALS DSGELI IKSSALAETTGIKGLTRNVFGIQEALAL  
AAKNAGINVS DISLIRINEATPVIGDVAMETITETIITESTMIGHNPKTPGGVGLGIGVT  
ITPQELLTC-PADKP-----YILVSSAFDFADVATMINAAVRAGYQLTGAILQQDDGV  
LVS NRLEKPLPVVDEVRYIDRIPLGMLAAIEVAVPGKVIETLSNPYGIATVFNLNSEETK  
NIVPMARALIGNRS AVVVKTPSGDVKARAI PAGNIELLSQGRTRIDVAAGADAIMKAVS  
NCPQLDNVTGEAGTNIGGML EHV RQTMAELTNKPSAEIFIQDLLAVDTSVPVSVTGGLAG  
EFSLEQAVGIAS MVKSDRLQMAMIAREIEQKLSIDVQVGGAEAEAA ILGAL TTPGTTRPL  
AILDLAGSTDASIINPKGEIIATHLAGAGDMVTMIIARELG LNDRYLAEEIKKYPLAKV  
ESLFHLRHEDGVSQFFPAPLPPEVFARVCVVKP-DELVPL-PGDIALEKVRAIRRSAKER  
VFVTNLRALRQVSPTGNIRDIPFVVLVGGSSLD FEVPQLVTDALAHYRLVAGRGNIRGT  
EGPRNAVATGLILS-----WHKA-----FAHGK-  
>gi++|157156561|ref|YP\_001463345.1| propanediol utilization diol dehydratase  
reactivation protein [Escherichia coli E24377A]  
----MRYIAGIDIGNSSTEVALATLSATGELSFVSSALAETTGIKGLTRNVHGIQEALAQ  
ATKKVGINVS DISLIRINEATPVIGDVAMETITETIITESTMIGHNPKTPGGVGLGVGLT  
ITPQELLTR-PADTP-----YILVSSAFDFADIATMINASVRAGYQLTG VILQRDDGV  
LVNNRLEIPLPIVDEVLYIDRIPLGMLAAIEVAVPGKVIETLSNPYGIATVFALNAEETK  
NIVPVARALIGNRS AVVVKTPSGDVKARSIPAGNIELLSAGRTTRVDVAAGADAIMKAVG  
ECPKLENTGEPG TNIGGML EHV RQTMAELTNKPSNEIFIQDLLAIDTSVPVSVTGGLAG  
EFSLEQAVGIAS MVKSDRLQMAMIASEIKQKLHVDVQVGGAEAEAA IQGAL TTPGTTRPL  
AILDLAGSTDASIINQS GEIVATHLAGAGDMVTMIIARELG LNDRYLAEEIKKYPLAKV  
ESLFHLRHEDGVSQFFPTPLSPHV FARVCVVKP-DELVPI-PGDLTQEKVRAVRRSAKER  
VFVTNLRALRQVSPGGNIRDIPFVVLVGGSSLD FEVPQLVTDALAHYRLVAGRGNIRGS  
EGPRNAVATGLILS-----WHRE-----LAHGK-  
>gi++|74312535|ref|YP\_310954.1| putative propanediol utilization protein: diol  
dehydratase reactivation [Shigella sonnei ss046]  
----MRYIAGIDIGNSSTEVALATLSATGELSFVSSALEETTGIKGLTRNVHGIQEALAQ  
ATKKVGINVS DISLIRINEATPVIGDVAMETITETIITESTMIGHNPKTPGGVGLGVGFT  
ITPQELLTR-PADTP-----YILVSSAFDFADIATMINASVRAGYQLTG VILQRDDGV  
LVNNRLEIPLPIVDEVLYIDRIPLGMLAAIEVAVPGKVIETLSNPYGIATVFALNAEETK  
NIVPVARALIGNRS AVVVKTPSGDVKARSIPAGNIELLSAGRTTRVDVAAGADAIMKAVG  
ECPKLENTGEPG TNIGGML EHV RQTMAELTNKPSNEIFIQDLLAIDTSVPVSVTGGLAG  
EFSLEQAVGIAS MVKSDRLQMAMIASEIKQKLHVDVQVGGAEAEAA IQGAL TTPGTTRPL  
AILDLAGSTDASIINQS GEIVATHLAGAGDMVTMIIARELG LNDRYLAEEIKKYPLAKV  
ESLFHLRHEDGVSQFFPTPLSPHV FARVCVVKP-DELVPI-PGDLTLEKVRVRRSAKER  
VFVTNLRALRQVSPAGNIRDIPFVVLVGGSSLD FEVPQLVTDALAHYRLVAGRGNIRGS  
EGPRNAVATGLLIA-----WHKE-----SIHGK-  
>gi++|215487216|ref|YP\_002329647.1| propanediol dehydratase reactivation protein  
PduG [Escherichia coli O127:H6 str. E2348/69]  
----MRYIAGIDIGNSSTEVALATLSATGELSLVSSALAETTGIKGLTRNVHGIQEALAQ  
ATKKVGINVS DISLIRINEATPVIGDVAMETITETIITESTMIGHNPKTPGGVGLGVGLT  
ITPQELLTC-PADTP-----YILVSSAFDFADIATMINASVRAGYQLTG VILQRDDGV  
LVNNRLEIPLPIVDEVLYIDRIPLGMLAAIEVAVPGKVIETLSNPYGIATVFALNAEETK  
NIVPVARALIGNRS AVVVKTPSGDVKARSIPAGNIELLSAGRTTRVDVAAGADAIMKAVG

SupplementalMultipleSequenceAlign.txt

ECPKLENTGEPGNSIGGMLHVRQTMAELTNKPSNEIFIQDLLAIDTSVPVNVTTGGLAG  
EFSLEQAVGIASMVKSDRLQMAMIASEIKQKLHVDVQVGGAEAEAAIQGALTPGTTRPL  
AILDLAGSTDASIINQKGEIVATHLAGAGDMVTMIIARELGLNDRYLAEEIKKYPLAKV  
ESLFHLRHEDGVSQFFPTPLSPHFVAVRVCVVKP-DELVPI-PGDLTLEKVRVRRSAKER  
VFVTNALRALRQVSPAGNIRDIPFVVLVGGSSLD FEVPQLVTDALAHYRLVAGRGNIRGS  
EGPRNAVATGLLIA-----WHKE-----SIHGK-

>gi++|218705536|ref|YP\_002413055.1| putative Propanediol utilization: diol  
dehydratase reactivation PduG [Escherichia coli UMN026]

----MRYIAGIDIGNSSTEIALATLSATGELSFVSSALAETTGIKGTLRNVHGIQEALAQ  
ATKKVGINVSDISLIRINEATPVIGDVAMETITETIITESTMIGHNPKTPGGVGLGVGLT  
ITPQELLTR-PADTP-----YILVSSAFDFADIATMINASVRAGYQLTGVLQGGDGV  
LVSNRLEIAVPIVDEVLIDRIPLGMLAAIEVAVPGKVIETLSNPYGIATVFALNAEETK  
NIVPVARALIGNRSVVVKTPSGDVKARSIPAGNIELLSAGRTTRVDVAAGADAIMKVVG  
ECPKLENTGEPGNTIGGMLHVRQTMAELTNKPSNEIFIQDLLAIDTSVPVSVTTGGLAG  
EFSLEQAVGIASMVKSDRLQMAMIASEIKQKLHVDVQVGGAEAEAAIQGALTPGTTRPL  
AILDLAGSTDASIINQKGEIVATHLAGAGDMVTMIIARELGLNDRYLAEEIKKYPLAKV  
ESLFHLRHEDGVSQFFPTPLSPHFVAVRVCVVKP-DELVPI-PGDLTLEKVRVRRSAKER  
VFVTNALRALRQVSPAGNIRDIPFVVLVGGSSLD FEVPQLVTDALAHYRLVAGRGNIRGS  
EGPRNAVATGLLIA-----LHKE-----SIHGK-

>gi++|218549346|ref|YP\_002383137.1| putative Propanediol utilization: diol  
dehydratase reactivation PduG [Escherichia fergusonii ATCC 35469]

----MRYIAGIDIGNSSTEVALAKVSEEGHLTILTSSLAETTGIKGTLRNVFGIEEALS  
AATQAGISVSDISLIRINEATPVIGDVAMETITETIITESTMIGHNPKTPGGVGLGVGV  
ITPEHLLTC-LADVP-----YILVSSAFDFADVAAMVNACVRAGYQITGIILQRDDGV  
LVSNRLDHPVPVDEVLIDRIPOGMLAAIEVAIPGKVIETLSNPYGIATVFHLDQAETK  
NIVPMARALIGNRSVVVKTPSGDVKARSIPAGNIELLSQGLTRVDVAAGAETIMKAVG  
DCPRLDNVIGEAGTNIGGMLHVRQTMAELTNKPTGEIFIQDLLAVDTAVPVTVSGGLAG  
EFSLEQAVGIASMVKSDRLQMAMIAHEIKQKINAEVQVGGAEAEAAILGALTPGTTRPL  
AILDLAGSTDASIINPQGEIATHLAGAGDMVTMIIARELGLDDRYLAEEIKKYPLAKV  
ESLFHLRHEDGVSQFFPQPLPPAVFARVCVVKP-DELVPL-PGDLALEKVRAIRRSAKER  
VFVTNALRALRQVSPTGNIRDIPFVVLVGGSSLD FEIPQLVTDALAHYRLVAGRGNIRGT  
EGPRNAVATGLLIS-----WQKE-----LADGR-

>gi++|152971727|ref|YP\_001336836.1| propanediol utilization: diol dehydratase  
reactivation [Klebsiella pneumoniae subsp. pneumoniae MGH 78578]

----MRYIAGIDIGNSSTEVALATVDDAGVLNIRHSALAETTGIKGTLRNVFGIQEALTQ  
AAKAAGIQLSDISLIRINEATPVIGDVAMETITETIITESTMIGHNPKTPGGVGLGVGIT  
ITPEALLSC-SADTP-----YILVSSAFDFADVAAMVNAATAAGYQITGIILQDDGV  
LVNNRLQQLPVIDEVQHIDRIPLGMLAAVEVALPGKIIETLSNPYGIATVFDLNAEETK  
NIVPMARALIGNRSVVVKTPSGDVKARAI PAGNLLLIAQGRSVQVDVAAGAEAIMKAVD  
GCGKLDNVAGEAGTNIGGMLHVRQTMAELTNKPAQEIRIQDLLAVDTAVPVSVTGGLAG  
EFSLEQAVGIASMVKSDRLQMALIAREIEHKLQIAVQVGGAEAEAAILGALTPGTTRPL  
AILDLAGSTDASIINAQGEISATHLAGAGDMVTMIIARELGLEDRYLAEEIKKYPLAKV  
ESLFHLRHEDGVSQFFPSALPPAVFARVCVVKP-DELVPL-PGDLPLEKVRAIRRSAKSR  
VFVTNALRALRQVSPTGNIRDIPFVVLVGGSSLD FEIPQLVTDALAHYRLVAGRGNIRGC  
EGPRNAVASGLLIS-----WQKG-----GTHGE-

>gi++|206579698|ref|YP\_002236779.1| propanediol utilization diol dehydratase  
reactivation protein [Klebsiella pneumoniae 342]

----MRYIAGIDIGNSSTEVALATVDDAGVLNIRHSALAETTGIKGTLRNVFGIQEALTQ  
AAKAAGIQVSDISLIRINEATPVIGDVAMETITETIITESTMIGHNPKTPGGVGLGVGIT  
ITPEALLSC-AADAP-----YILVSSAFDFADVAAMVNAATAAGYQISGIILQDDGV  
LVNNRLQQLPVIDEVQHIDRIPLGMLAAVEVALPGKIIETLSNPYGIATVFNLNAEETK  
NIVPMARALIGNRSVVVKTPSGDVKARTIPAGNLLLIAQGRSVQVDVAAGAEAIMKAVD  
GCGKLDNVAGEAGTNIGGMLHVRQTMAELTNKPAQEIRIQDLLAVDTAVPVSVTGGLAG  
EFSLEQAVGIASMVKSDRLQMALIAREIEHKLQIAVQVGGAEAEAAILGALTPGTTRPL  
AILDLAGSTDASIINAQGEISATHLAGAGDMVTMIIARELGLEDRYLAEEIKKYPLAKV  
ESLFHLRHEDGVSQFFPSALPPAVFARVCVVKP-DELVPL-PGDLPLEKVRAIRRSAKSR  
VFVTNALRALRQVSPTGNIRDIPFVVLVGGSSLD FEIPQLVTDALAHYRLVAGRGNIRGS  
EGPRNAVASGLLIS-----WQKG-----GTHGE-

>gi++|123442949|ref|YP\_001006924.1| putative propanediol utilization protein: diol  
dehydratase reactivation [Yersinia enterocolitica subsp. enterocolitica 8081]

----MDYIVGVDIGNSSTEVALAQCMTDGQLHFVTSTLTETTGIKGTQRNIFGITKALNM  
LVEKAGIALSDINLIRINEATPVIGDVAMETITETIITESTMIGHNPKTPGGVGLGVGLT  
ITIDELVTR-DPNQP-----YILVSPVAVDFADVAAMVNAANGAGYRITAIILQRDDGV

SupplementalMultipleSequenceAlign.txt

LVNRLTHPLPIVDEVLHDIRIPMGMLAAVEVAMPGQVIETLSNPYGIATVFGLSAEETK  
NIVPVARALIGTRSAVVVKTPEGDVKARAI PAGHLEL FANGRTVRVDVATGAETIMTAVN  
SFRHLDNVSGEAGTNIIGMLEHVRQTMAGELTNKPTNEIFIQDLLAVDTAVPVNVIGGLAG  
EFSLEQAVGSIASMVKSDRLQMAHIASEIEKTLNIDVQVGGAEAEAAAILGALTTGTRRPL  
AILDLAGAGSTDASIINAQQQIVATHLAGAGDMVTMIASELDLQDRYLAEDIKKYPLAKV  
ESL FHLRHEDG SVQFFPQPLPPEV FARLVVVKP- EGLVPL- PGDYALEKVRNIRRSAKER  
VFVTNLRALRQVSPTGNIRDIPFVVLVGGSSLD FEIPQLVTDALSHYKLVAGRGNIRAS  
EGPRNAVATGLILS-----WQRE-----NHV-----  
>gi++|116872530|ref|YP\_849311.1| propanediol utilization diol dehydratase  
reactivation protein [Listeria welshimeri serovar 6b str. SLCC5334]  
-----MKYIAGIDIGNSTTEVALAIKDATNKA EFVSAITD TTG IKGTKQNLHGIFKALKL  
ALEKVNATTADLMEIRINEATPVIGDVAMETITETIITESTMIGHNPKTPGGLGMGSGIT  
VFLDEVTTK-PKDTD-----YIVII PKTVDFEDA AKLINEYTQSGYQITAA ILQADDGV  
LVHNRLN HKIPIVDE VGFIDKVPV DMLAAVEVAAPGKVIETISNPYGIATVFHLSDET K  
NIIPVARALIGNRS AVVIKTPEG DVKARTIPAGHIELQSGSRTQRVNVAEGSEKIMQAIT  
SLPKLDNASGEPGTNIGGMLEKVRQTMAGLTDKLPADIFIQDLLAVDTFVPVDVQGGLAG  
EFSMEQAVGSIASMVKSDHLQMAAIASEIEQELNVTVKIGGAEAEAAAILGALTTGTRRPL  
AILDLAGAGSTDASIINGKGEIIATHLAGAGDMVTMIVQSEIGLED RYLAEDIKKYPLAKV  
ESIFHIRHEDGTVQFFDTP LSPSVFAKVVIVKP-DGFVPI-PGDVSIEKIKLIRRSAKER  
VFVTNTIRALKYVSPTGNIRDIPFVVIVGGSSALDFEIPQLITDALSHYSLVAGRGNIRGE  
EGPRNAVATGLILS-----GGAE-----A-----  
>gi++|16800189|ref|NP\_470457.1| hypothetical protein lin1120 [Listeria innocua  
Clp11262]  
-----MKYIAGIDIGNSTTEVALAILDSVNNAEFVSAITD TTG IKGTKQNLHGIFKALKL  
ALEKVNATTADLAEIRINEATPVIGDVAMETITETIITESTMIGHNPKTPGGLGMGSGIT  
VHLDEVASK-SKDTD-----YIVII PKTVDFEDA AQINDYTELGYQITAA ILQADDGV  
LVHNRLN HKIPIVDE VGFIDKVPV DMLAAVEVAAPGKVIETISNPYGIATVFR LSSDET K  
NIIPVARALIGNRS AVVIKTPEG DVKARTIPAGHIELQSGTRTQRVNVAEGSEKIMQAIM  
SLPKLDNASGEPGTNIGGMLEKVRQTMAGLTDKLPADIFIQDLLAVDTFVPVDVQGGLAG  
EFSMEQAVGSIASMVKSDHLQMAAIASEIEQELNVTVKIGGAEAEAAAILGALTTGTRRPL  
AILDLAGAGSTDASIINGKGEIIATHLAGAGDMVTMIIQSEIGLED RYLAEDIKKYPLAKV  
ESIFHIRHEDGTVQFFDTP LSPSVFAKVVIVKP-DGFVPI-PGDVSIEKIKLIRRSAKER  
VFVTNTIRALKYVSPTGNIRDIPFVVIVGGSSALDFEIPQLITDALSHYSLVAGRGNIRGQ  
EGPRNAVATGLILS-----GGAN-----V-----  
>gi++|16803196|ref|NP\_464681.1| hypothetical protein lmo1156 [Listeria monocytogenes  
EGD-e]  
-----MKYIAGIDIGNSTTEVALAMANSSKEAAFVSAITD TTG IKGTKQNLHGIFKALRL  
ALEKVNATTEDLAEIRINEATPVIGDVAMETITETIITESTMIGHNPKTPGGLGMGSGVT  
VLLDDVTSK-SK DAD-----YIVII PKTVDFEDA AKQINTYVENGYQITAA ILQADDGV  
LVHNRLN HKIPIVDE VGFIDKVPV DMLAAVEVAAPGKVIETISNPYGIATVFH LNSDET K  
NIIPVARALIGNRS AVVIKTPEG DVKARTIPAGHIELQSGSRTQRVNVAEGSEKIMQAIM  
SLPKLDNASGEPGTNIGGMLEKVRQTMAGLTDKLPADIFIQDLLAVDTFVPVDVQGGLAG  
EFSMEQAVGSIASMVKSDHLQMAAIASEIEQELQVSVKIGGAEAEAAAILGALTTGTRRPL  
AILDLAGAGSTDASIINGKGEIIATHLAGAGDMVTMIIQSEIGLED RYLAEDIKKYPLAKV  
ESIFHIRHEDGTVQFFDTP LSPSVFAKVVIVKP-DGFVPI-PGDVSIEKIKLIRRSAKER  
VFVTNTIRALKYVSPTGNIRDIPFVVIVGGSSALDFEIPQLITDALSHYSLVAGRGNIRGK  
EGPRNAVATGLILA-----GGAK-----A-----  
>gi++|46907374|ref|YP\_013763.1| propanediol utilization: diol dehydratase  
reactivation [Listeria monocytogenes str. 4b F2365]  
-----MKYIAGIDIGNSTTEVALAMANYSKEAVFVSAITD TTG IKGTKQNLHGIFKALRI  
ALEKVNATTENLAEIRINEATPVIGDVAMETITETIITESTMIGHNPKTPGGLGMGSGVT  
VLLDDVTSK-SK DED-----YIVII PKTVDFEDA AKQINTYVENGYQITAA ILQADDGV  
LVHNRLN HKIPIVDE VGFIDKVPV DMLAAVEVAAPGKVIETISNPYGIATVFH LNSDET K  
NIIPVARALIGNRS AVVIKTPEG DVKARTIPAGHIELQSGSRTQRVNVAEGSEKIMQAIM  
SLPKLDNASGEPGTNIGGMLEKVRQTMAGLTDKLPADIFIQDLLAVDTFVPVDVQGGLAG  
EFSMEQAVGSIASMVKSDHLQMAAIASEIEQELQVSVKIGGAEAEAAAILGALTTGTRRPL  
AILDLAGAGSTDASIINGKGEIIATHLAGAGDMVTMIIQSEIGLED RYLAEDIKKYPLAKV  
ESIFHIRHEDGTVQFFDTP LSPSVFAKVVIVKP-DGFVPI-PGDVSIEKIKLIRRSAKER  
VFVTNTIRALKYVSPTGNIRDIPFVVIVGGSSALDFEIPQLITDALSHYSLVAGRGNIRGK  
EGPRNAVATGLILA-----GGAK-----A-----  
>gi++|116334193|ref|YP\_795720.1| propanediol utilization ATPase [Lactobacillus  
brevis ATCC 367]  
-----MQKIVIGVDIGNSSTEVALADISDQGA VDFINS DIAETTGIKGTQNLIGIKKAITQ

SupplementalMultipleSequenceAlign.txt

VLNKSHLALSIDDLIRINEATPVIGDVAMETITETVITESTMIGHNPNTPGGVGIGSGYT  
VSLQLLQETDKTRP-----YIVLVPAEVDFAAKLINLYQQSGYQINAAAILQNDG  
LIDNREHKIPIVDEVARIDKVPMMAGVEVAGKGQVISQLSNPYGIATLFDLTADETK  
NIVPVSRALIGNRSVAVIKTPKGDVKARVIPAGSIQIEGDRSDKVNVAAGAEAIMKKVN  
QFDRIQDITGEAGTNVGGMLEKVRQTMADLTNKQNRDIAIQDLLAVNTAVPVKVVQGLAG  
EFSTEQAVGIAAMVKSDDLQMQQIADLIQDELHISVEIGGAEAEAAAILGALTTPTGTTKPI  
AAILDLGAGSTDASIIINQDDIVAIHLGAGADMVTMIINSELGLDDVYLAEDIKKYPLARV  
ENLFQIRHEDGTVQFFEDPLPADIFARTVVIKPDGYVPL-PGNMNIKVKQIRQTAKKR  
VFVENARRALQHVSPGNIRDIPFVVIVGGSALDFEIPQLVTEDELSHYNLVAGRGNIRAV  
EGPRNAVATGLILS-----YARERRDAYGQHNG  
>gi++|125717400|ref|YP\_001034533.1| propanediol utilization:dioldehydratase  
reactivation, putative [Streptococcus sanguinis SK36]  
----MKRIIGVDIGNSSTESALAEVQDDGSIHFLASAIADTTGIKGTKENVHGIYQSLRK  
LMEQTSFELGQVDLIRINEATPVIGDVAMETITETVITESTMIGHNPRTPGGLGLGIGLT  
VDLIDLVHH-PIDEK-----YIVVVPKVIDFDLVAQLINAYLAKGYITAAAILQADDGV  
LVNNRISQKIPIVDEILFIDKVLPLGMAAVEVVEQKQVISQLSNPYGIATVFLSAEETK  
SIVPIARALIGNRSVAVIKTPAGDVQARTIPAGSIQIIGKEHTLKVDISKGADEIMEKIV  
YAGEISNVVGEAGTNVGGMLEKVRQTMADLTEKEPSDIYIRDLLAVNTFAPISVRGGVAG  
EFSMEQAVGIAASMVNSDKLQMSIIAQEVERELGITVEIGGAEAEAAAILGALTTPTGDRPL  
AAILDLGAGSTDASIIIDSRGQILAVHLGAGADMVTMLINSELGLENHHLAEDIKRYPLAKV  
ESLFHIRHEDGTVQFFDKPLSGDLFARVVIVKENDEFVPIDDGDYSIEKIKLVRQSAKER  
VFVTNAVRALKRVSPTQGNIRDIPFVVIVGGSALDFEIPQLVTEALSQHAIVAGRGNVRGL  
VGPRNAVATGLILTYVREKMGAD----YGISLY  
>gi++|148544950|ref|YP\_001272320.1| diol/glycerol dehydratase reactivating factor,  
large subunit [Lactobacillus reuteri DSM 20016]  
--MATEKVIIGVDIGNSSTESALAEVQDDGSIHFLASAIADTTGIKGTQNLVGIKIRDSITQ  
VLNKSNTLIDDLIRINEATPVIGDVAMETITETVITESTMIGHNPNTPGGIGTGAGIT  
VRLDLLLKKTKDKSKN-----YIVVVPKVIDFDVAKLINAYVASGYKITAAILRNDDGV  
LVDNRLNHHKIPIVDEVAMIDKVLNMLAAVEVAGPGQVISQLSNPYGIATLFGLTPEETK  
NIVPVSRALIGNRSVAVIKTPAGDVKARVIPAGKIIINGDTGKEEVGVSEGADAIMKKVS  
SFRHINNITGESGTVGGMLENVRQTMADLTGKKNDEIAIQDLLAVDTQVPVEVRGGLAG  
EFSNESAVGIAAMVKSDDLQMQQIADLIQDELHISVEIGGAEAEAAAILGALTTPTGDKPI  
AAILDLGAGSTDASIIINKENQMEVIAKLIEKEFNTKVEIGGAEVESAIRGALTTPTGDKPI  
ENLFQIRHEDGTVQFFDKPLPSSLFAKVVVIKPDGYEPV-TGNPSIEKIKLVRQSAKRR  
VFVTNALRALKYSPTGNIRDIPFVVIVGGSALDFEIPQLVTEDELAHFNLVAGRGNVRGV  
EGPRNAVATGLILR-----YGEERRKRYEQR--  
>gi++|167040579|ref|YP\_001663564.1| hypothetical protein Teth514\_1950  
[Thermoanaerobacter sp. x514]  
-----MIIAGVDIGNSTTEVALAKV-NGDEIRFLASGISNTTGIKGTQPNVEGVRHALED  
AVRKANLTIKDIDLLRINEATPVISDIAMEAITETIITESTMIGHNPPTPGGVGLGIGIT  
IPIFELEK-KHGEE-----VIVVIPKNVDYEDAANKIINNAFSGKVEVKGAIAQKDDGV  
LIATRLQRRIPVDEVKQIEKVPIGMLACVEVAEPGYTIKTLSNPYGIASVFNLTAEETK  
NIVPVARALIGNRSVAVIRTPKGEVQERKIPAGTLIIKGNRTFTVDIEEGAEAIMSAVE  
STWPLVDAEGTPTNVGGLIARIKETMADVTGQDSSNIQIQDVLAVDTLVRQKVKGGIAE  
EFSSENAVALAAMVKSDDLQMQQIADLIQDELHISVEIGGAEAEAAAILGALTTPTGTELPL  
AAILDLGGGSTDAAALMTKNGEVKSVHMAGAGEMVNMLIKTELGIEDKYLVEDIKKYPVCRV  
ESLFSIRLEDGTVRFFKEPLDPRTFARVCLLRE-DGLLPL-PPELNMEKVINVRRNAKRR  
VFVTNALRALSKVAPAGNIRLIDFVVMVGGALDFEIPPEMISDTLAGYGIVAGRGNIRNV  
EGPRNAVATGLVLS-----RCKRK-----  
>gi++|218782817|ref|YP\_002434135.1| Diol/glycerol dehydratase reactivating factor  
large subunit [Desulfatibacillum alkenivorans AK-01]  
-----MLIAGVDIGNSTEVAVARI--GAEVQFLSSALVRTIGLKGLTRNAMCVIDAVDK  
AMAAVSMTRNDLILLNKATPVIGDVAMETITETVITESAMIGHNPDTPGGLGLGQGV  
VDIRDLTQT-APGAP-----CIVVIDGDVDFQAEMINAAAAGVKITGAIVKKDDGV  
LIYNRLTSPPIVDEVQHIDKVLPLGMPAALEVARVGRSIEKLSNPYDIATLFLSPEETR  
QITPIARALTGNRSGVVIKTPKGDVQERRIPAGTITLVGETAKETVDVELGADAIMEKLA  
RVAPLKEIQSQPGTNAHGFMFERVRTVMAELTDQPVSLIKIQDVLAVNTLQPQHVLGGLAG  
EFTRGTAVGLAAMVMTQNIQPMQRLAAKLKEETGVEVEIGGVEAEMAITGALTTPGAAPL  
AAILDLGGGSTDASIIHRDGTVKSIIHMAGADMVTMLINTELGLDDPDLAEDIKRYPLAKV  
ETLFHMRHETGAVEFFDAHLDPFLFRVAILGE-NGPIPI-MHDLNLNQIVNVRRAKAKEK  
VFVRNALRALEQVAPGGNIRLIDFVALVGGALDFEIPPEMIADALAEYGPVLGKGNIRGC  
EGPRNAVATGLCLS-----RKGC-----  
>gi|187934454|ref|YP\_001886291.1| glycerol dehydratase reactivation factor large

SupplementalMultipleSequenceAlign.txt

subunit [Clostridium botulinum B str. Eklund 17B]  
----MKIIAGVDIGNATTEVALSKV-ENGIKFLSSGIVPTTGIGKTEENIDGVFSSLKGLK  
ALNKNVLELKDNLNLRINEAAPVIGDVAMETITETIITESTMIGHNPSTPGGVGLGIGKT  
IYIEELDNL-EVDKI--EENQFIPLILSRVNFLEAAARINAATQRGINITSAVVQRDDGV  
LINNRLKKKIPIVDEVMLLEKVPVLMKAAVEVAAQGGVVETLSNPYGIATVFNLTSEETK  
MIVPISRALIGNRSVVIKTPKGDVQEKSIKIPAGKIHINGLKRKEVVDVEHGAEKIMDAVN  
LCVPIQDVKGEAGTNAGGMLERVRQVMANLTKQKISDITIQDLLAVDTFIPQMVKGGGLAA  
EFSMENAVGIAAMVKADKQLQMQMIADKLEQLNVPVEVGGVEADMAIRGALTPGSSTPL  
AILDGAGSTDASIINKQGEICSIHLAGAGNMVTMLIKSELGLEDFSLAEDIKKHPLAKV  
ESLFHIRHEDGTVEFFQKPLDSSVFAKVVILKD-GMLVPI-DGQNSLEKIRNIRKCAKEK  
VFVTNCLRALKIVSPTGNIRDIEFVVLVGGSSLD FEVPQVVTNALSQYGVVAGRGNIRGS  
EGPRNAVATGLVLA-----FDGN----GESK--  
>gi|188589918|ref|YP\_001921320.1| glycerol dehydratase reactivation factor large  
subunit [Clostridium botulinum E3 str. Alaska E43]  
----MKIIAGVDIGNATTEVALSKV-ENGNVEFLSSGIVPTTGIGKTEENIDGVFSSLKGLK  
ALKKVNLELKDNLNLRINEAAPVIGDVAMETITETIITESTMIGHNPSTPGGVGTGIGKT  
IYIEDLDNL-EIDKI--EENQFIPLILSRVNFLEAAARINAATQRGINITS AIVQRDDGV  
LINNRLKKKIPIVDEVTLLEKVPVGMKAAVEVAAQGDVVETLSNPYGIATVFNLTSEETK  
MIVPISRALIGNRSVVIKTPKGDVQEKSIKIPAGKIHINGLKRKEVVDVEHGAEKIMDAVN  
LCVPIQDVKGEAGTNAGGMLERVRQVMANLTKQKISDITIQDLLAVDTFIPQMVKGGGLAA  
EFSMENAVGIAAMVKADKQLQMQMIADKLEQLNVPVEVGGVEADMAIRGALTPGSSTPL  
AILDGAGSTDASIINRQGEICSIHLAGAGNMVTMLIKSELGLEDFNLAEDIKKHPLAKV  
ESLFHIRHEDGTVEFFEKPLESAVFAKVVILKD-GMLVPI-DGQTSLEKIRNIRKCAKEK  
VFVTNCLRALKIVSPTGNIRDIEFVVLVGGSSLD FEVPQVVTNALSQYGVVAGRGNIRGT  
EGPRNAVATGLVLA-----FNGN----GEIK--  
>gi|18309914|ref|NP\_561848.1| glycerol dehydratase reactivation factor, large  
subunit [Clostridium perfringens str. 13]  
----MKIIAGIDIGNSSTETALGKV-YENNVEFLSSGIIPTTGIGKTEENISGVIASLNQ  
ALKKANLTLEDLNLVINEAAPVIGDVAMETITETIITESTMIGHNPSTPGGLVGVGIGKT  
IRLETLETL-NIDEIKEEDNAFIPLVLGNISFLEAVFIINQATRRGINITAAIVQKDDGV  
LINNRLDKKIPVDEVSLLEKVPVDMKAAVEVAPQGSVIRQLSNPYGIATVFDLSPEETK  
MIVPISRALIGNRSVVIKTPQGDVKEKKIPAGKINITGMRRKESVDVEEGADKIMEAVS  
LCSPIEDLRGDAGSNVGGMLEKVRQVMADLTNQSISDIKIQLDLAVDTFIPQKVKGGGLAK  
EFSMENAVGIAAMVKAHKLQMQIIANKLEELKGVPEVGGVEADMAIRGALTPGTNTPL  
AILDGAGSTDASIINKEGKITSIHLAGAGNMVTMLIKSELGIEDFGLAEDIKKYPLAKV  
ESLFHIRHEDGTVEFFEKPLDSSVFAKIVIIKE-GMLIPV-DGQNSLEKIKNVRKTAKER  
VFVINCLRALKIVSPTGNIRDIEFVVLVGGSSLD FEVPELVTDALSHYGVVAGRGNIRGC  
EGPRNAVATGLVLA-----FDRK----GVKEND  
>gi|110803450|ref|YP\_698330.1| glycerol dehydratase reactivation factor, large  
subunit [Clostridium perfringens SM101]  
----MKIIAGIDIGNSSTETALGKV-YENNVEFLSSGIIPTTGIGKTEENISGVIASLNQ  
ALKKANLTLEDLNLVINEAAPVIGDVAMETITETIITESTMIGHNPSTPGGLGIGIGKT  
IRLETLETL-NIDEIKEEDNAFIPLVLGNISFLEAVFRINQATRRGINITAAIVQKDDGV  
LINNRLDKKIPVDEVSLLEKVPINMKAAVEVAPQGSVIRQLSNPYGIATVFDLSPEETK  
MIVPISRALIGNRSVVIKTPQGDVKEKKIPAGKINIKGIRRKESVDVEEGADKIMEAVS  
LCSPIEDLRGDAGSNVGGMLEKVRQVMADLTNQSISDIKIQLDLAVDTFIPQKVKGGGLAK  
EFSMENAVGIAAMVKAHKLQMQIIANKLEELKGVPEVGGVEADMAIRGALTPGTNTPL  
AILDGAGSTDASIINKEGNITSIHLAGAGNMVTMLIKSELGIEDFGLAEDIKKYPLAKV  
ESLFHIRHEDGTVEFFEKPLDSSVFAKIVIIKE-GMLIPV-DGQNSLEKIKNVRKTAKER  
VFVINCLRALKIVSPTGNIRDIEFVVLVGGSSLD FEVPELVTDALSHYGVVAGRGNIRGC  
EGPRNAVATGLVLA-----FDRK----GVKEND  
>gi|110798899|ref|YP\_695622.1| glycerol dehydratase reactivation factor, large  
subunit [Clostridium perfringens ATCC 13124]  
----MKIIAGIDIGNSSTETALGKV-YENNVEFLSSGIIPTTGIGKTEENISGVIASLNQ  
ALKKANLTLEDLNLVINEAAPVIGDVAMETITETIITESTMIGHNPSTPGGLVGVGIGKT  
IRLETLETL-NINEIKEEDNAFIPLVLGNISFLEAVFRINQATRRGINITAAIVQKDDGV  
LINNRLDKKIPVDEVSLLEKVPVDMKAAVEVAPQGSVIRQLSNPYGIATVFDLSPEETK  
MIVPISRALIGNRSVVIKTPQGDVKEKKIPAGKINITGMRRKESVDVEEGADKIMEAVS  
LCSPIEDLRGDAGSNVGGMLEKVRQVMADLTNQSISDIKIQLDLAVDTFIPQKVKGGGLAK  
EFSMENAVGIAAMVKAHKLQMQIIANKLEELKGVPEVGGVEADMAIRGALTPGTNTPL  
AILDGAGSTDASIINKEGKITSIHLAGAGNMVTMLIKSELGIEDFGLAEDIKKYPLAKV  
ESLFHIRHEDGTVEFFEKPLDSSVFAKIVIIKE-GMLIPV-DGQNSLEKIKNVRKTAKER  
VFVINCLRALKIVSPTGNIRDIEFVVLVGGSSLD FEVPELVTDALSHYGVVAGRGNIRGC

SupplementalMultipleSequenceAlign.txt

EGPRNAVATGLVLA-----FDRK-----GVKEND  
>gi|152972002|ref|YP\_001337148.1| glycerol dehydratase activator [Klebsiella pneumoniae subsp. pneumoniae MGH 78578]

----MPLIAGIDIGNATTEVALASD-DPQARAFVASGIVATTGMKGTRDNIAGTLAALAEQ  
ALAKTPWSMSDVSRIYLNEAAPVIGDVAMETITETIITESTMIGHNPQTGGVGVGVGTT  
IALGRLATL-PAAQY---AEGWIVLIDDAVDFLDAVWMLNEALDRGINVVAAILKKDDGV  
LVNNRLRKTLPVVDEVTLLEQVPEGVMAAVEVAAPGQVVRILSNPYGIATFFGLSPEETQ  
AIVPIARALIGNRSAVVLKTPQGDVQSRVIPAGNLYISGEKRRGEADVAEGAEAIMQAMS  
ACAPVRDIRGEPGTHAGGMLERVRKVMASLTGHEMSAIYIQDLLAVDTFIPRKVQGGMAG  
ECAMENAVGMAAMVKADRLQMQVIARELSARLQTEVVVGGVEANMAIAGALTTPGCAAPL  
AILDLAGSTDAAIIVNAEGQITAVHLAGAGNMVSLLIKTELGLEDSLAEAIKKYPLAKV  
ESLFSIRHENGAVEFFREALSPAFAKVVYIKE-GELVPI-DNASPLEKIRLVRRQAQEK  
VFVTNCLRALRQVSPGGSIRDIAFVVLVGGSSLD FEIPQLITEALSHYGVVAGQGNI RGT  
EGPRNAVATGLVLA-----GQAN-----

>gi|206577418|ref|YP\_002236504.1| glycerol dehydratase reactivation factor, large subunit [Klebsiella pneumoniae 342]

----MPLIAGIDIGNATTEVALASD-DPQARAFVASGIVATTGMKGTRDNIAGTLAALAEQ  
ALAKTPWSMSDVSRIYLNEAAPVIGDVAMETITETIITESTMIGHNPQTGGVGVGVGTT  
IALGRLATL-PAAQY---AEGWIVLIDDAVDFLDAVWMLNEALDRGINVVAAILKKDDGV  
LVNNRLRKTLPVVDEVTLLEQVPEGVMAAVEVAAPGQVVRILSNPYGIATFFGLSPEETQ  
AIVPIARALIGNRSAVVLKTPQGDVQSRVIPAGNLYISGEKRRGEADVAEGAEAIMQAMS  
VCAPVRDIRGEPGTHAGGMLERVRKVMASLTGHEMSAIYIQDLLAVDTFIPRKVQGGMAG  
ECAMENAVGMAAMVKADRLQMQVIARELSARLQTEVVVGGVEANMAIAGALTTPGCAAPL  
AILDLAGSTDAAIIVNAEGQITAVHLAGAGNMVSLLIKTELGLEDSLAEAIKKYPLAKV  
ESLFSIRHENGAVEFFREALSPAFAKVVYIRE-GELVPI-DNASPLEKIRLVRRQAQEK  
VFVTNCLRALRQVSPGGSIRDIAFVVLVGGSSLD FEIPQLITEALSHYSVVAGQGNI RGT  
EGPRNAVATGLVLA-----GQAN-----

>gi|197247887|ref|YP\_002145307.1| glycerol dehydratase reactivation factor large subunit [Salmonella enterica subsp. enterica serovar Agona str. SL483]

-----  
-----  
-----  
-----

-----MQAIASELSARLNTPVEVGGVEANMAVAGALTTPGCDAPL  
AILDLAGSTDAAIINSDGVVKAHLAGAGNIVSLLIQTELGLSDPFLAEAIKKYPLAKV  
ESLFSIRHENGAVEFFREPLSPSVFAKVVYLKE-GELIPV-DNQTSLKIRLVRRQAQEK  
VFVTNCLRALRQVSPGGSIRDITFVVLVGGSSLD FEIPQMITDALAHYGVVAGQGNI RGT  
EGPRNAVATGLVLA-----GEAK-----K-----

>gi|108801915|ref|YP\_642112.1| hypothetical protein Mmcs\_4952 [Mycobacterium sp. MCS]

MSRDSVVVAGCDVGNHTTEIVLARVAADGVVEPLTHGQAPTRGRKGSTESLEGAAALLNR  
LEVEARVRVDEVVLATIRPVDTATAPLAPAVSPRAPV--RSLRRPDASTPAGAGHGVGTH  
VPLADLSGP-VHPGP-----VIVSVSAATDFEVAAQAIGDGVASGWKIAGVLAQDDAV  
LIRNRIPIIDVPVVEVE-LDGLRRGALVAVEVVAEGRAYRALADPIALSAALQLGHDRL  
DVAEFTREL-----ADAPAIAVTARTEPPDPPAVDDD----YVDCRIGGEIVRYAPA  
AAHTVLRLE-PPGCAVE---VRLSALPAAENGIADVDAFFTDLASIDNGA--WLRRGVA-  
----DARGTVVALLAAE--PVTDAATLSGLTGRPARTVAGEPAAAARGAQTTPGLPPGS  
VVCDIGGGTVDLI-----GQGRVTVAAGAGETITTAVSRVLGIP-RALAERVKRTPALRV  
EGPHVAHEEDGRRVFLDSPAADAIGRLCTRGS-AGLVPF-SHRLAAEEWRSLRLAIKQQ  
TVAANIARCLATFDEPPSA-----LVLAGGGALDDELLRTVGESLRPARVVVGRADIDGV  
HGPRFAVASGLVHL-----YAED--RVGSTSPA

>gi|126437896|ref|YP\_001073587.1| hypothetical protein Mjls\_5333 [Mycobacterium sp. JLS]

MSRDSVVVAGCDVGNHTTEIVLARVAADGVVEPLTHGQAPTRGRKGSTESLEGAAALLNR  
LEVEARVRVDEVVLATIRPVDTATAPLAPAVSPRAPV--RSLRRPDASTPAGAGHGVGTH  
VPLADLSGP-VHPGP-----VIVSVSAATDFEVAAQAIGDGVASGWKIAGVLAQDDAV  
LIRNRIPIIDVPVVEVE-LDGLRRGALVAVEVVAEGRAYRALADPIALSAALQLGHDRL  
DVAEFTREL-----ADAPAIAVTARTEPPDPPAVDDD----YVDCRIGGEIVRYAPA  
AAHTVLRLE-PPGCAVE---VRLSALPAAENGIADVDAFFTDLASIDNGA--WLRRGVA-  
----DARGTVVALLAAE--PVTDAATLSGLTGRPARTVAGEPAAAARGAQTTPGLPPGS  
VVCDIGGGTVDLI-----GQGRVTVAAGAGETITTAVSRVLGIP-RALAERVKRTPALRV





SupplementalMultipleSequenceAlign.txt

>gi++|62180622|ref|YP\_217039.1| propanediol utilization: diol dehydratase reactivation [*Salmonella enterica* subsp. *enterica* serovar *Choleraesuis* str. SC-B67]  
-----MDSNHSAPAIVITVINDC---ASLWHEVLLGIEEEGIPFLL-QR  
HPAGDVVD-SAWQAARSSPLLVGIACDRH-----TLVVHYKNLPASAPLFTL--MHHQD  
SQAQRNTGNNAARLVKGIPIFRDLHA-----  
>gi++|197247978|ref|YP\_002147001.1| propanediol dehydratase reactivation protein [*Salmonella enterica* subsp. *enterica* serovar *Agona* str. SL483]  
-----MDSNHSAPAIVITVINDC---ASLWHEVLLGIEEEGIPFLL-QH  
HPAGDVVD-SAWQAARSSPLLVGIACDRH-----SLVVHYKNLPASAPLFTL--MHHQD  
SLAHRNTGNNAARLVKGIPIFRDLHA-----  
>gi++|215487217|ref|YP\_002329648.1| propanediol dehydratase reactivation protein PduH [*Escherichia coli* O127:H6 str. E2348/69]  
-----MESKERAPAIIVMEIGDC---ITTWDEVLLGIEEEGIPFRI-QH  
IPSGEVID-SAWLAARQSPLLVGIACDQE-----KLIVHYKNLPASAPLFTL--MYQQD  
NHARRSIGTNAARLVKGIPIFRELSH-----  
>gi++|74312536|ref|YP\_310955.1| putative propanediol utilization protein: diol dehydratase reactivation [*Shigella sonnei* Ss046]  
-----MESKERAPAIIVMEIGDC---ITTWDEVLLGIEEEGIPFRI-QH  
IPSGEVID-SAWLAARQSPLLVGIACDRE-----ELIVHYKNLPASAPLFTL--TYQQD  
NHTRRSIGTNAARLVKGIPIFREFHS-----  
>gi++|218705537|ref|YP\_002413056.1| putative diol dehydratase reactivation pduH [*Escherichia coli* UMN026]  
-----MESKERAPAIIVMEIGNC---ITIWDEVLLGIEEEGIPFRI-QH  
IPSGEVID-SAWLAARQSPLLVGIACDQE-----KLIVHYKNLPPSAPLFTL--MYQQD  
NHARRSIGTNAARLVKGIPIFREFHS-----  
>gi++|206579863|ref|YP\_002236778.1| propanediol utilization protein PduH [*Klebsiella pneumoniae* 342]  
-----MESSLVTPAIVIAVTDEC---SEQWRDVLGIEEEGIPFVL-QP  
RTGGDLVH-HAWQAAQRSPPLLVGIACDRE-----QLIVHYKNLPASTPLFSL--RYHQD  
RLARRNTGNNAARLVKGIPIFRDRNA-----  
>gi++|152971728|ref|YP\_001336837.1| propanediol utilization: diol dehydratase reactivation [*Klebsiella pneumoniae* subsp. *pneumoniae* MGH 78578]  
-----MESSVVAIPAIVIAVTDEC---SEQWRDVLGIEEEGIPFVL-QP  
QTGGDLIH-HAWQAAQRSPQLVGIACDRE-----RLIVHYKNLPASTPLFSL--MYHQD  
RLARRNTGNNAARLVKGIPIFRDRHA-----  
>gi++|161502792|ref|YP\_001569904.1| hypothetical protein SARI\_00843 [*Salmonella enterica* subsp. *arizonae* serovar 62:z4,z23:--]  
-----MESNHNLPAIVIT-TLRC--HISDWQHVLGIEEEGIPWVV-QE  
QEAGEVIY-QAWLAASRSPLLVGIACDRE-----KLIVHYKNLPPSAPLFTL--TYHQD  
NCAQRCTGNNAARLVKGIPIFRECDSSSTGEKQYE-----  
>gi++|218549347|ref|YP\_002383138.1| putative Propanediol utilization: diol dehydratase reactivation PduH (modular protein) [*Escherichia fergusonii* ATCC 35469]  
MHYVPYARLARPAISATFLLWCWLAVLRWTSKSHNWLLTSPITVWLPDAAIFVAPKVHA  
MLSLRVCCSPGKRSLMDVNASTPAIVIAVSKEC---LPLWQEVLLGIEEEGIPFVI-NE  
SPFDDVTK-SAWQAACHSPLLVGIAACNAQ-----QLIVHYKNLPPSAPLFTL--TTQHP  
SHARRSTGNNAARLVKGIPIFREYQA-----  
>gi++|123442950|ref|YP\_001006925.1| putative propanediol utilization protein: diol dehydratase reactivation [*Yersinia enterocolitica* subsp. *enterocolitica* 8081]  
-----MNFTQDAPAIVISLTSPT--PEAVWHQVLLGIEEEGIPWQW-QQ  
DDSDAIL-RAWQAATRSPLLVLGLACSAD-----EVIVHFRHLPPASPLFRQ--PLAQD  
EDQLRRLGNNAARLVKGLPKF-----  
>gi++|16803197|ref|NP\_464682.1| hypothetical protein lmo1157 [*Listeria monocytogenes* EGD-e]

SupplementalMultipleSequenceAlign.txt

-----MIPVVSKPAIYFHADVDA--NPDSIKQVLFGIEEEGIPCEL-EI  
MPLKDEVQ-AAFRASASSPLLVGVTLNKND-----HLVIHYRNLPDPKPLFSAHRFCAST  
LENQRNMGMNAAARLVKGVVFK-----  
>gi++|16800190|ref|NP\_470458.1| hypothetical protein lin1121 [Listeria innocua  
Clp11262]

-----MIPVVNKPPIYFHADQSA--NPDCIKQVLFGIEEEGIPCEL-EI  
MPLKDEVQ-AAFRASASSPLLVGITLNKND-----HLVIHYRNLPDQPLFSEYRFAAT  
LEKQRNMGMNAAARLVKGVVFK-----  
>gi++|217964774|ref|YP\_002350452.1| PduH protein [Listeria monocytogenes HCC23]

-----MIPVVSKPAIYFHADVDA--NPDSIKQVLFGIEEEGIPCEL-EI  
MPLKDEVQ-AAFRASASSPLLVGVTLNKND-----HLVIHYRNLPDPKPLFSAHRFCATT  
LENQRNMGMNAAARLVKGVVFK-----  
>gi++|116872531|ref|YP\_849312.1| propanediol utilization diol dehydratase-  
reactivating factor small chain [Listeria welshimeri serovar 6b str. SLCC5334]

-----MIPVVSKPAIYFHADTEA--NPECIKQVLFGIEEEGIPCEL-EI  
MPLKEEVQ-AAFRASASSPLLVGITLNKND-----HLVIHYRNLPDQPLFSEYRFAAT  
LEKQRNMGMNAAARLVKGVVFK-----  
>gi++|46907375|ref|YP\_013764.1| PduH protein [Listeria monocytogenes str. 4b F2365]

-----MIPVVSKPAIYFHADVDA--NPDSIKQVLFGIEEEGIPCEL-EI  
MSLKDEVQ-AAFRASASSPLLVGVTLNKND-----HLVIHYRNLPDPKPLFSAHRFCATT  
LENQRNMGMNAAARLVKGVVFK-----  
>gi++|116334192|ref|YP\_795719.1| diol dehydratase medium subunit [Lactobacillus  
brevis ATCC 367]

-----MANTMDKPAIFIAVPTAASDLPATLKPLLNGIEEEAIPVQT-KV  
IAEDDVTI-RAYQAALASRLSVGIGFDDQ-----HVVVHYKNLHAEQPLFTV---TRDS  
ADRLRRLGANAARLVKGVVFKTLN-----  
>gi++|125717401|ref|YP\_001034534.1| PduH protein, putative [Streptococcus sanguinis  
SK36]

-----MELAYTRKPTIRLIATDDA--PADKVAQIGYGIEEEGIPFSLVSP  
DEVSDPVS-LAHVAATQSLLVGIACDGR-----DAVLHYRNLPLEKFIYRIKDYSaip  
DHVLRLLFGSNAARLVKGVVFKKSDLLEASF-----  
>gi++|184154286|ref|YP\_001842627.1| propanediol dehydratase reactivation protein  
PduH [Lactobacillus reuteri JCM 1112]

-----MAKKEGSMNNDSDQRPSIVVLENGIT-IPDSVKPLFYGIEEEQIPVSV-RK  
ININDTVE-RAYQSALASRLSVGIAFEGD-----HFIVHYKNLKENQPLFDM---TIND  
KKQLRILGANAARLVKGIPIFKEMANR-----  
>gi++|148544949|ref|YP\_001272319.1| hypothetical protein Lreu\_1743 [Lactobacillus  
reuteri DSM 20016]

-----MNNDDSDQRPSIVVLENGIT-IPDSVKPLFYGIEEEQIPVSV-RK  
ININDTVE-RAYQSALASRLSVGIAFEGD-----HFIVHYKNLKENQPLFDM---TIND  
KKQLRILGANAARLVKGIPIFKEMANR-----  
>gi++|218782816|ref|YP\_002434134.1| hypothetical protein Dalk\_4995  
[Desulfatibacillum alkenivorans AK-01]

-----MGSPLLQVAQKPAVYLVVLGEEA--PDWVQALENGLEEEGIPVSV-RD  
SQENDAVL-AASQAASRINVL SVKAAAGGAI TGVVLRHHRDLPEKRPLFHL-TWEEVS  
TESLNRLGRNAARLVKGNPFIMDTADTAGPCGDSGTDKLN  
>gi++|167040578|ref|YP\_001663563.1| hypothetical protein Teth514\_1949  
[Thermoanaerobacter sp. x514]

-----MSKDEIKKPVVLIYCDTIEG-TNIYLLKICEGLEEEGVVFIQVQV  
EKVEDSVEVLAQNASRNSNLGIGIGVLKN-----GDCALLQRRLLPNLPIQTL-RGEKYD  
PNLYRNIGINAARLAKNPLVFA-----  
>gi|18309915|ref|NP\_561849.1| glycerol dehydratase reactivation factor, small  
subunit [Clostridium perfringens str. 13]

SupplementalMultipleSequenceAlign.txt

```
-----MIKDYNHPSIFVYCSLGI--NEVDIEEILWGIEEEGIPFIL-KN
KDLNDAKE-LANLAANDSKLSVGIGVNSK-----GDVSLTINKLKEEEPLFFI--NLEEG
NTCLRSLGANGARLVKGMPLKNI-----
>gi|110802064|ref|YP_698331.1| glycerol dehydratase reactivation factor, small
subunit [Clostridium perfringens SM101]
-----MIKDYNHPSIFVYCSLGI--NEVDIEEILWGIEEEGIPFIL-KN
KDLNDAKE-LANLAANDSKLSVGIGVNSK-----GDVSLTINKLKEEEPLFFI--NLKEG
NTCLRSLGANGARLVKGMPLKNI-----
>gi|110800791|ref|YP_695623.1| glycerol dehydratase reactivation factor, small
subunit [Clostridium perfringens ATCC 13124]
-----MIKDYNHPSIFVYCSLGI--NEVDIEEILWGIEEEGIPFIL-KN
KDLNDAKE-LANLAANDSKLSVGIGVNSK-----GDVSLTINKLKEEEPLFFI--NLEKG
NTCLRSLGANGARLVKGMPLKNI-----
>gi|118472367|ref|YP_885931.1| PduH protein [Mycobacterium smegmatis str. MC2 155]
-----MIQVFTALTGTSGELAAVTRDVLAGEIEEGVPYAVTTV
AEDVPVAD-LARRAAMRSPQLQVGVGIGAG-----GGVCVHHDMLEDPLPELSS--ADPAD
SAAARTLGHNAARIVVGLPLKPD-----
>gi|187935085|ref|YP_001886290.1| glycerol dehydratase reactivation factor, small
subunit [Clostridium botulinum B str. Eklund 17B]
-----MVMRHFKYDMPTICLYHSSNLE-DLTKFNEILWGLEEEGIPCNISSK
EDSLSSEE-LSHMASQSKLAVGIGIDKS-----GKITLTLNKLKKEYEPLFTV--SLNDE
DKVLRALGANAGRLVKGI AFK-----
>gi|206578150|ref|YP_002236498.1| glycerol dehydratase reactivation factor, small
subunit [Klebsiella pneumoniae 342]
-----MSLSPPGVRLFYDPRGH-HAGAINELCWGLEEQGVPCQTITY
DGGGDAAA-LGALAARSSPLRVGIGLSAS-----GEIALTHAQLPADAPLATG--HVTDS
DDHLRTLGANAGQLLKVLPLSERN-----
>gi|188588782|ref|YP_001921319.1| glycerol dehydratase reactivation factor, small
subunit [Clostridium botulinum E3 str. Alaska E43]
-----MMMRHFKYDMPTICLYHCSTLK-DLTI FNEILWGLEEEGIPCKVSSK
EDSLSSEE-LSHIASQSR LAVGIGIDKS-----GKVTLTLNKLKKEYEPLFTV--SLDDG
DKVLRALGANAGRLVKGI AFK-----
=====
%% PduO [targeting tail not implicated]
>gi++|16765380|ref|NP_460995.1| propanediol utilization protein [Salmonella
typhimurium LT2]
-----MAIYTRT--GDAGTTS L--FTGQRVSKTHPRV--EAYGTLDELNAALSLC-AC-AA
-----ADEN-----HR--TLLEAIQ--QQLFWF-----SAELAS--DS
-EQPSPK-----QRYISSEEISALEAAI-----DR
AMARVE-PLH-----SFIL-----
-----P
G--RC--EAASR-LHFAR-----TLARRAERRLVELAT-----EVNV-----
-----RQVLMRYI-----NRLS-----DC-----LY--ALARAE
DSDAHQANIIREVS-----KRYLAACQPPH SKETTPVALSFHDLHQLTRAAVERAQQQLQV
PVVVSIVDAHGTTETVTRMPDALLVSELAPKKAWTAVAMKTATHELSDVVQPGAALYGL
ESHLQKGVVTFGGGYALWRD GILIGGLGISGGSVEQDMDIAQTAIAA INVGTHQ
>gi++|56413048|ref|YP_150123.1| hypothetical protein SPA0821 [Salmonella enterica
subsp. enterica serovar Paratyphi A str. ATCC 9150]
-----MAIYTRT--GDAGTTS L--FTGQRVSKTHPRV--EAYGTLDELNAALSLC-AC-AA
-----ADEN-----HR--TLLEAIQ--QQLFWF-----SAELAS--DS
-EQPSPK-----QRYISSEEISALEAAI-----DR
```

SupplementalMultipleSequenceAlign.txt

AMARVE-PLH-----SFIL-----  
-----P  
G--RC--EAASR-LHFAR-----TLARRAERRLVELAT----EVNV----  
-----RQVLMRYI-----NRLS-----DC-----LY--ALARAE  
DSDAHQANIIREVS-----KRYLAASQPTRSKETTPVALSFHDLHQLTRAAVERAQQQLQV  
PVVVSIVDAHGTETVTWRMPDALLVSSELAPKKAWTAVAMKTATHELSDVVQPGAALYGL  
ESHLQGKVVTFGGGYALWRDGLIGGIGISGGGSVEQDMDIAQTAAIAAINVGTHQ  
>gi++|16760982|ref|NP\_456599.1| hypothetical protein STY2255 [Salmonella enterica  
subsp. enterica serovar Typhi str. CT18]

-----MAIYTRT--GDAGTTSL--FTGQRVSKTHPRV--EAYGTLDELNAALSLC-AC-AA  
-----ADEN-----HR--TLLEAIQ--QQLFWF----SAELAS--DS  
-EQPSPK-----QRYISSEEISALEAAI-----DR  
AMARVE-PLH-----SFIL-----  
-----P  
G--RC--EAASR-LHFAR-----TLARRAERRLVELAT----EVNV----  
-----RQVLMRYI-----NRLS-----DC-----LY--ALARAE  
DSDAHQANIIREVS-----KRYLAASQPTRSKETTPVALSFHDLHQLTRAAVERAQQQLQV  
PVVVSIVDAHGTETVTWRMPDALLVSSELAPKKAWTAVAMKTATHELSDVVQPGAALYGL  
ESHLQGKVVTFGGGYALWRDGLIGGLGISGGGSVEQDMDIAQTAAIAAINVGTHQ  
>gi++|198241779|ref|YP\_002216135.1| PduO [Salmonella enterica subsp. enterica  
serovar Dublin str. CT\_02021853]

-----MAIYTRT--GDAGTTSL--FTGQRVSKTHPRV--EAYGTLDELNAALSLC-AC-AA  
-----ADEN-----HR--TLLEAIQ--QQLFWF----SAELAS--DS  
-EQPSPK-----QRYISSEEISALEAAI-----DR  
AMARVE-PLH-----SFIL-----  
-----P  
G--RC--EAASR-LHFAR-----TLARRAERRLVELAT----EVNV----  
-----RQVLMRYI-----NRLS-----DC-----LY--ALARAE  
DSDAHQANIIREVS-----KRYLAASQPTRSKETTPVVL SFHDLHQLTRAAVERAQQQLQV  
PVVVSIVDAHGTETVTWRMPDALLVSSELAPKKAWTAVAMKTATHELSDVVQPGAALYGL  
ESHLQGKVVTFGGGYALWRDGLIGGLGISGGGSVEQDMDIAQTAAIAAINVGTHQ  
>gi++|194446088|ref|YP\_002041317.1| PduO [Salmonella enterica subsp. enterica  
serovar Newport str. SL254]

-----MAIYTRT--GDAGTTSL--FTGQRVSKTHPRV--EAYGTLDELNAALSLC-AC-AA  
-----ADEN-----HR--TLLEAIQ--QQLFWF----SAELAS--DS  
-EQPSPK-----QRYISSEEISALEAAI-----DR  
AMARVE-PLH-----SFIL-----  
-----P  
G--RC--EAASR-LHFAR-----TLARRAERRLVELAT----EVNV----  
-----RQVLMRYI-----NRLS-----DC-----LY--ALARAE  
DSDAHQANIIREVS-----KRYLAASQPTRSKETTPVALSFHDLHQLTRAAVERAQQQLQV  
PVVVSIVDAHGTETVTWRMPDALLVSSELAPKKAWTAVAMKTATHELSDVVQPGAALYGL  
ESHLQGKVVTFGGGYALWRDGLIGGLGISGGGSVEQDMDIAQTAAIAAINVGTHQ  
>gi++|62180628|ref|YP\_217045.1| hypothetical protein SC2058 [Salmonella enterica  
subsp. enterica serovar Choleraesuis str. SC-B67]

-----MAIYTRT--GDAGTTSL--FTGQRVSKTHPRV--EAYGTLDELNAALSLC-AC-AA  
-----ADEN-----HR--TLLEAIQ--QQLFWF----SAELAS--DS  
-EQPSPK-----QRYISSEEISALEAAI-----DR  
AMARVE-PLH-----SFIL-----  
-----P  
G--RC--EAASR-LHFAR-----TLARRAERRLVELAT----EVNV----  
-----RQVLMRYI-----NRLS-----DC-----LY--ALARAE  
DSDAHQANIIEVS-----KRYLAASQPTRSKETTPVALSFHDLHQLTRAAVERAQQQLQV  
SVVVSIVDAHGTETVTWRMPDALLVSSELAPKKAWTAVAMKTATHELSDVVQPGAALYGL

SupplementalMultipleSequenceAlign.txt

ESHLQ GKVVTFGGGYALWRD GILIGGLGISGG SVEQDMDIAQTAIAA INVGTHQ  
>gi++|206580295|ref|YP\_002236772.1| propanediol utilization protein, PduO  
[Klebsiella pneumoniae 342]

-----MAIYTRT--GDAGSTSL--FTGQRVSKTHPRV--EAYGTLDELNAVLSLC-VC-AA  
-----AEEE-----HR--VLLEALQ--QHIFWF-----SAELAS--DS  
-EQSPSG-----KRYISSEEIALLEQTI-----DR  
EMARVP-ALH-----QFVL-----

-----P  
G--RC--EAASR-LHLAR-----TVARRAERRLVELAA----EVTI----  
-----RQILLRYL-----NRLS-----DC-----LY--ALARSE  
DHADHQRRRLVAEIA--ARYLAASGSPASDAPKAQAGALSFHELHQLTRQAIEHARQLQV  
PVVVISIVDAHGTTETVTRMPDALLVSSELAPKKA WTAVAMKTATHELATTVQPGAALYGL  
ESHLQ GKVVTFGGGYPLWRD GQLIAGLGISGG SVEQDMAIAQAAMAA INVRTHQ

>gi++|152971734|ref|YP\_001336843.1| propanediol utilization: B12 related [Klebsiella pneumoniae subsp. pneumoniae MGH 78578]

-----MAIYTRT--GDAGSTSL--FTGQRVSKTHPRV--EAYGTLDELNAML SLC-VC-AV  
-----AEEE-----QR--TLLEALQ--QHIFWF-----SAELAS--DS  
-EQSPSG-----KRYISSEEIALLEQTI-----DR  
EMARVP-ALH-----QFVL-----

-----P  
G--RC--EAASR-LHLAR-----TVARRAERRLVELAA----EVTI----  
-----RQILLRYL-----NRLS-----DC-----LY--ALARSE  
DHAHQRRRLVTEIA--ARYLAASGSPAPDAPKAQAGSLSFHELHQLIRQAIEHARQLQV  
PVVISIVDAHGTTETVTRMPDALLVSSELAPKKA WTAVAMKTATHELATTVQPGAALYGL  
ESHLQ GKVVTFGGGYPLWRD GQLIAGLGISGG SVEQDMAIAQAAMAA INVRTHQ

>gi++|161502786|ref|YP\_001569898.1| hypothetical protein SARI\_00837 [Salmonella enterica subsp. arizonae serovar 62:z4,z23:--]

-----MAIYTRT--GDAGTTAL--FSGQRVSKTHPRV--EAYGTLDELNAALS LC-AC-TT  
-----HHPQ-----HR--RFIESIQ--QQIFWF-----SAELAS--ES  
-EQPNPG-----QRYISTEEIAVLEAAI-----DA  
AMSRVA-VVH-----SFIL-----

-----P  
G--RC--EAASR-LHFAR-----TLARRAERRLVELSA----DIAV----  
-----RQVLMRYI-----NRLS-----DC-----LY--ALARAE  
DHDAHQRHIINEVT-----RRYLASTYPTIKESSMSLSFQELHQLIRSAVARAEELHV  
PVVISIVDNGTPTVTRMPDALLVSSELAPKKA WTAVAMKSATHELASAVQPGAALYGL  
DTHMQGKIVTFGGGFALWRNGVLIGGLGISGG SVEQDMDIAQAIAA IDVRTYQ

>gi++|218705542|ref|YP\_002413061.1| putative propanediol utilization B12 related protein (pduO-like) [Escherichia coli UMN026]

-----MAIYTRT--GDSGSTSL--FTGQRVSKTHLRV--ETYGTLDELNATLS LC-YC-AT  
-----AIES-----HR--ILLEAIQ--QQIFWF-----SAELAS--ES  
-EQPSAQ-----QRYIGTEEIAALENAI-----DS  
AMNAV P-PVH-----SFIL-----

-----P  
G--RC--EAASR-MHFAR-----TVARRAERRLVELTT----ETTV----  
-----RNVLLHYI-----NRLS-----DC-----LY--ALARVE  
DNVAHQNLMIQEIT-----KRYHEANHTPALKERTMPLSFQDLHQLIRSAALRADELHI  
PVVISIVDANGTESVTTRMPDALLVSSELAPKKA WTAVAMKTATHK LADTVQPGAPLYGL  
ESHMQGKVVTFGGGFPLWRD GKL LGG LGISGG SVEQDMDIAQSAMAA INVG V NQ

>gi++|157158139|ref|YP\_001463351.1| propanediol utilization protein, PduO  
[Escherichia coli E24377A]

-----MAIYTRT--GDSGSTSL--FTGQRVSKTHLRV--ETYGTLDELNATLS LC-YC-AT  
-----AIES-----HR--ILLEAIQ--QQIFWF-----SAELAS--ES  
-EQPSAQ-----QRYIGTEEIAALENAI-----DS

SupplementalMultipleSequenceAlign.txt

```
AMNAVP-PVH-----SFIL-----
-----P
G--RC--EAASR-MHFAR-----TVARRAERRLVELTT----ETTV----
-----RNVLLHYI-----NRLS-----DC-----LY--ALARVE
DNVAHQNLMIQEIT-----KRYHEANHIPALKERTMPLTFQDLHQLIRSAAMRADELHI
PVVISIVDANGTESVTWRMPDALLVSSELAPKKAWTAVAMKTATHKLADTVQPGAPLYGL
ESHMQGKVVTFGGGFPLWRDGLLGGGLGISGGGSVEQDMDIAQSAMAAINVGVNQ
>gi++|215487223|ref|YP_002329654.1| propanediol utilization protein PduO,
AdoCbl-dependent [Escherichia coli O127:H6 str. E2348/69]
-----
----MAIYTRT--GDSGSTSL--FTGQRVSKTHLRV--ETYGTLDELNATLSLC-YC-AT
-----AIES-----HR--ILLEAIQ--QQIFWF----SAELAS--ES
-EQPSAQ-----QRYIGTEEIAALENAI-----DS
AMNAVP-PVH-----CFIL-----
-----P
G--RC--EAASR-MHFAR-----TVARRAERRLVELTT----ETTI----
-----RNVLLHYI-----NRLS-----DC-----LY--ALARVE
DNVAHQNLMIQEIT-----KRYHEANHTPALKERTMPLTFQDLHQLIRSAAMRADELHI
PVVISIVDANGTESVTWRMPDALLVSSELAPKKAWTAVAMKTATHKLADTVQPGAPLYGL
ESHMQGKVVTFGGGFPLWRDGLLGGGLGISGGGSVEQDMDIAQSAMAAINVGVNQ
>gi++|74312542|ref|YP_310961.1| putative propanediol utilization protein: B12
related [Shigella sonnei Ss046]
-----
----MAIYTRT--GDSGSTSL--FTGQRVSKTHLRV--ETYGTLDELNATLSLC-YC-AT
-----AIES-----HR--ILLEAIQ--QQIFWF----SAELAS--ES
-EQPSAQ-----QRYIGTEEIAALENAI-----DS
AMNAVP-PVH-----SFIL-----
-----P
G--RC--EAASR-MHFAR-----TVARRAERRLVELTT----ETTV----
-----RNVLLHYI-----NRLS-----DC-----LY--ALARVE
DNVAHQNLMIQEIT-----KRYHEANHTPALKERTMPLTFQDLHQLIRSAAMRADELHI
PVVISIVDANGTESVTWRMPDALLVSSELAPKKAWTAVAMKTATHKLADTVQPDAPLYGL
ESHMQGKVVTFGGGFPLWRDGLLGGGLGISGGGSVEQDMDIAQSAMAAINVGVNQ
>gi++|218549352|ref|YP_002383143.1| putative propanediol utilization protein: B12
related pduO, Bifunctional ATP:cob(I)alamin adenosyltransferase/GlcG domain
[Escherichia fergusonii ATCC 35469]
-----
----MAIYTRT--GDKGTAL--FTGQRVSKTHPRV--ETYGTLDELNAALSLC-RC-AV
-----ESPE-----RR--SLLEAVQ--LQIFWF----SAELAS--ES
-EQPSAQ-----QQSISAREIAELEAAI-----DH
AMSRVP-PVH-----SFIL-----
-----P
G--RS--EAASR-LHFAR-----TLARRAERRLVELSE----QFPV----
-----RNELQRYI-----NRLS-----DC-----LY--ALARAE
DHENHQKNLIQEVT-----ARYLAAVTTQTHKESAMSLSFQELHLLTRAAIARAEELHI
PVVISIVDANGTESVTWRMPDALLVSSELAPKKAWTAVAMKMATHDLAAAVQPGASLYGL
DTHMQGKVVTFGGGFPLWRDGSIVGGLGVSGGSVEQDMDIAQTAAAAAINVRTMK
>gi++|123442956|ref|YP_001006931.1| putative propanediol utilization protein: B12
related [Yersinia enterocolitica subsp. enterocolitica 8081]
-----
----MSIYTKT--GDAGTTAL--FTGQRVKKSHPRV--ETYGTLDELNAALSLC-AR-VA
-----QGEE-----NL--QLLDAIQ--HQLFYF----SAELAS--EG
IETPPCG-----RKSISEQDIQALEQAV-----DR
CIAQLP-PVQ-----GFIL-----
-----P
G--NT--EAGSR-LHFAR-----TLARRCERRLIELAE----QVPV----
-----RPVLLQYL-----NRLS-----DC-----LY--ALARDE
DQRQTLQQAHTVV---ARYLAATTEKPVATTQPTSAGLGFSDVHQLVKLAVEAAMTLQI
```

SupplementalMultipleSequenceAlign.txt

TVVVALADRHGNMIMTYRMPDPTLLVSELAPKKAWTAVALKTATHQLSAAIQPGADLFQL  
EASTGGKVVVSGGGYPLWRDGLVGGGLGISGGSV EQD MYIAETAISALHLRNE-  
>gi++|16800197|ref|NP\_470465.1| ATP:cob(I)alamin adenosyltransferase protein PduO  
[Listeria innocua Clip11262]

-----MSIYTKT--GDKGTTAL--FDGNRVK KYDDR V--ETYGSFDELNAEISVA-EK---  
-----FVTS-----HENKTLLRNVE--RQLFYV----CAELAT--ED  
ESALAS-----KIVITEDDINELEKVI-----DA  
YTLKLP-KVD-----SFVL-----

-----P  
G--SS--KAGAF-LHSAR-----TIARRAERLLVRFSE----QTAV----  
-----RNELLKFV-----NRLS-----DF-----LY--ILAREE  
DFRQMLDKATKLIV-----AKYLEQTEQKPSSTSDLSFSFCEKLMHQVQVSEEVGV  
PVT LAIVDAHG NARFN YRMEHALLVSAELATKKAYS AVAMKTST EKL TEAVQPGAPLYQL  
ETLTNGDIVTFGGGVPIYKGDGAIIGGMGISGGSV EEDIHI AKKALSMIEKG--

>gi++|116872538|ref|YP\_849319.1| ATP:cob(I)alamin adenosyltransferase protein PduO,  
putative [Listeria welshimeri serovar 6b str. SLCC5334]

-----MSIYTKT--GDKGTTAL--FDGNRVK KYDDR V--ETYGSFDELNAEISVA-EK---  
-----FVTS-----SENKALLRNVE--RQLFYV----CAELAT--EN  
ESALAS-----KIIITEEDIKELEKVI-----DD  
YTAKLP-KVD-----SFVL-----

-----P  
G--SS--TAGAF-LHSAR-----TIARRGERLLVRFSE----QTTV----  
-----RKELLKFV-----NRLS-----DF-----LY--ILAREE  
DFRQMLDKATKLIV-----AKYLEQTGQEK S ISTDLSFSFCEKLMHQVCIVSEEVGV  
PVT LAIVDAHG NPRFN YRMEHALLVSAELATKKAYS AVAMKTST ENLAEAVQPGAPLYQL  
ETLTNGDIVTFGGGPIYKGDGAIIGGMGISGGSV EEDIHI AKKALSMIEKG--

>gi++|46907382|ref|YP\_013771.1| PduO protein [Listeria monocytogenes str. 4b F2365]

-----MSIYTKT--GDKGTTAL--FDGNRVK KYDDR V--ETYGSFDELNAEISVA-EK---  
-----FVTS-----AENKTLLRNVE--RQLFYV----CAELAT--EH  
EASLAS-----KIIITENDINQLEKVI-----DD  
YTAKLP-KVD-----SFVL-----

-----P  
G--SS--TAGAF-LHSAR-----TVARRGERLLVRLSE----QTAI----  
-----RKELLKFV-----NRLS-----DF-----LY--ILAREE  
DFRQMLDKATKLIV-----AKYLEQTGQEK SVTSDLSFSFCEKLMHQVCIVSEEIGV  
PVT LAIVDAHG NARFN YRMEHALLVSAELATKKAYS AVAMKTST EKL TEAVQPGAPLYQL  
ETLTNGDIVTFGGGVPIYKGDGAIIGGMGISGGSV EEDIHI AKKALSMIEKG--

>gi++|16803204|ref|NP\_464689.1| ATP:cob(I)alamin adenosyltransferase protein PduO  
[Listeria monocytogenes EGD-e]

-----MSIYTKT--GDKGTTAL--FDGNRVK KYDDR V--ETYGSFDELNAEISVA-EK---  
-----FVTS-----AENKSLLRNVE--RQLFYV----CAELAT--EH  
EASLAS-----KIIITENDINQLEKVI-----DD  
YTAKLP-KVD-----SFVL-----

-----P  
G--SS--TAGAF-LHSAR-----TVARRGERLLVRLSE----QTDI----  
-----RKELLKFV-----NRLS-----DF-----LY--ILAREE  
DFRQMLDKATKLIV-----AKYLEQTGQEK SVTSDLSFSFCEKLMHQVCIVSEEIGV  
PVT LAIVDAHG NARFN YRMEHALLVSAELATKKAYS AVAMKTST EKL TEAVQPGAPLYQL  
ETLTNGDIVTFGGGVPIYKGDGAIIGGMGISGGSV EEDIHI AKKALSMIEKG--

>gi++|217964767|ref|YP\_002350445.1| PduO [Listeria monocytogenes HCC23]

-----MSIYTKT--GDKGTTAL--FDGNRVK KYDDR V--ETYGSFDELNAEISVA-EK---  
-----FVTS-----AENKSLLRNVE--RQLFYV----CAELAT--EH  
EASLAS-----KIIITENDINQLEKVI-----DD  
YTAKLP-KVD-----SFVL-----

SupplementalMultipleSequenceAlign.txt

```
-----P
G--SS--TAGAF-LHSAR-----TVARRGERLLVRLSE----QTAI----
-----RKELLKFV-----NRLS-----DF-----LY--ILAREE
DFRQMLDKATKLIV-----AKYLEQTGQEKSVTCDLSFSFCEKLMHQVCIVSEEIGV
PVTLAIVDAHGNARFNRYRMEHALLVSAELATKKAYSAMKTSTEKLTEAVQPGAPLYQL
ETLTNGDIVTFGGVPIYKGDGAIIGGMGISGGSVEEDIHIKALSMIEKG--
>gi++|167040572|ref|YP_001663557.1| ATP--cobalamin adenosyltransferase
[Thermoanaerobacter sp. X514]
-----
----MRIYTRV--GDKGETSL--IGGRKVEKCDQRV--ETYGTVDEAISAISLA-RS---
-----CVKR-----EQVRGYLQKIE--EDLFIL----NSELATLEPE
KL-----EVRLTQEEVKWVEKKI-----DE
ITENIKLPRD-----FILPGPYLSSSSLHLARTVVRRAEREAVKLRSQNIR
EEILMYLNRLSDFLYCCALFEETEIIKQAVTEISKSVKEKVSNEMKEEKILFKIVKDII
QKAQEKAEEIRKPMCIAVVDEYGYLIAFERMEGALLGSIELAINKAKTAVLLKMETSELH
E--LA--QPSGE-LY-----GINNASSLNFVTFGG-----
-----GIPLRWG-----GRLI-----GG-----IG--VSGGSV
EEDIAVATSCVKEM-----EHILEILYK-----
-----
>gi++|26250349|ref|NP_756389.1| hypothetical protein c4529 [Escherichia coli CFT073]
-----
-----MS--ANEASLDN--WINEAIATQLPEL--RMSLSLEDESELLAKLV-RE-MA
QS-----SNVS-----IVF-SLVDACG--QQRFFF----SMD-----
-----NALLVSHTLAPQKAWT-----AV
ALKMPTHELA-----TLVQ-----
-----
-----P
G--GD-----LY-----GLEK--EKDICCFFG-----
-----GFPCWSG-----RRLI-----GG-----IG--ISGGSV
EEDMLIARQAMAQF-----SVLRYPLTTTR-----
-----
>gi++|117626451|ref|YP_859774.1| putative propanediol utilization protein: B12
related [Escherichia coli APEC 01]
-----
-----MS--ANEASLDN--WINEAIATQLPEL--RMSLSLEDESELLAKLV-RE-IA
QS-----SNVS-----IVF-SLVDACG--QQRFFF----SMD-----
-----NALLVSHTLAPQKAWT-----AV
ALKMPTHELA-----TLVQ-----
-----
-----P
G--GD-----LY-----GLEK--EKDICCFFG-----
-----GFPCWSG-----RRLI-----GG-----IG--ISGGSV
EEDMLIARQAMAQF-----SVLRYPLTTTR-----
-----
>gi++|116334185|ref|YP_795712.1| glycolate and propanediol utilization protein
[Lactobacillus brevis ATCC 367]
-----M
NEEQLSQIIRDVIAKQGGTTM--NLFDRHMMKVID--AAVARADELKVGVTIC-----
-----IMDQATVPQMLYHM-----P-
-----NANLVSSTLAPKKAWS-----AI
AMKEPTKEIS-----KDIQ-----
-----
-----P
G-----AP-LY-----QMETMLDGKLVSFPG--GIPLVI----
-----NGTAIGAI-----GVSG-----GL-----IE--EDQSIC
E--AAVAFLKESK-----
-----
>gi++|90422685|ref|YP_531055.1| hypothetical protein RPC_1173 [Rhodopseudomonas
```



SupplementalMultipleSequenceAlign.txt

palustris BisB18]

```
-----M
SAPTAEMRSITEAIHAVLANL--NGPAFALDDACRL----ARAAEHKAAEIGVP-MV---
-----ISIADA-----TGGMLL-----
-----LHRMDGALPASFDIAI-----NK
AYTAAIFRMA-----THDL-----
-----G
A--LA--QPGRS-LY-----GVQTTNQGRVVIFGG-----
-----GYPVLR-----TTVI-----GA-----IG--VSGGTV
EQDMQIATFALQTF-----EAEAKLCAEGE-----
```

>gi++|148544942|ref|YP\_001272312.1| ATP:cob(I)alamin adenosyltransferase [Lactobacillus reuteri DSM 20016]

```
-----MN
EEQISKIVENV-IKNNASKNL--FDRHKMEK--VID--AAVARANELGVGVTTIA-----
-----IMKA-----DQVLQM-----SYHMPN-----
-----ANLVSCTLAPKKAWS-----AL
AMKEPTKDIS-----KDIQ-----
-----P
G--AG-----LY-----QMETMLDGKLASFAG-----
-----GIPLKIN-----DEII-----GA-----IG--VSGGLV
EEDQSICEAAVAEF-----LKESK-----
```

>gi++|116334186|ref|YP\_795713.1| adenosylcobalamin-dependent diol dehydratase gamma subunit [Lactobacillus brevis ATCC 367]

```
-----P
----MPIYTKG--GDKGSTSL--YDGTRVRKDSLRLV--DTYGTDELNANVSLA-DK-FC
-----VKAE-----NK--AILQKIE--YKMFFL----QGEIAT--QT
AGKFNAN-----SRVITDDVMTMLEQVI-----DR
YTAELP-KVT-----SFIL-----
-----P
G--AS--LAGAQ-LHICR-----TVCRRAERMFVRFST----DVEV-----
-----RPVLERIV-----NRLS-----DF-----FY--IMARSE
DYEQVNELTDQVM-----KRYAQAVGR-----
```

>gi++|148544943|ref|YP\_001272313.1| ATP--cobalamin adenosyltransferase [Lactobacillus reuteri DSM 20016]

```
-----P
----MAIYTKG--GDKGETSL--FDGTRVPKDSLRLV--ETYGTDELNANISLA-DK---
-----FCES-----KRNKLLQEIE--YKMFFL----QGEIAT--EK
RQYFTDK-----SKIITDEDTRKLEKVI-----DE
YTSKLP-PVH-----SFIL-----
-----P
G--SS--TAGAQ-LHICR-----TICRRAERLFVRLSK----NVKF-----
-----RPELERYI-----NRLS-----DF-----LY--IVARDE
DYEDLLNSVTDDVLKIYKRYQEEKDVR-----
```

>gi++|83592249|ref|YP\_426001.1| ATP:cob(I)alamin adenosyltransferase [Rhodospirillum rubrum ATCC 11170]

```
-----MNASAQ
DIDRISVAVRTVLAIEIGQTPA--ALGPLGLKDAQRL--AALAAIKAAEIAVPV-----
-----IAVADV-----SGGLIL-----
-----VHRMDGTLPASIDIAI-----NK
AFTAAAFRTA-----THDL-----
```

SupplementalMultipleSequenceAlign.txt

```
-----G
A--LA--QPGQP-LY-----GIQSTNQGRVVIFGG-----
-----GFPCRCG-----GPLA-----GA-----IG--ISGGTV
EEDMQIASYALRMF-----LEESGFCPEGEK-----
-----
```

>gi++|125717402|ref|YP\_001034535.1| PduO protein, putative [Streptococcus sanguinis SK36]

```
-----MA--RDREKDEL-----SPEL--SSWGGNSELQDSI----IQ---
-----KVLARCQ---TLLDK----EPLLFT--NI
YQDA-----WELVTRARRKAEELGL-----AV
VITVVD-PAA-----QVVM-----
-----
```

```
-----T
Y-----RMENA-LLVSN-----DMAYKKAYTAVGMRMQSKDLAPL----
-----TQPGQWL-----YQLE-----TMTDNKVVSLAGGIPIY--CQSEMI
GGIGVSGGSSEEDQ-----SIAEYAVGLQSSKLAN-----
-----
```

>gi++|218782809|ref|YP\_002434127.1| protein of unknown function DUF336 [Desulfatibacillum alkenivorans AK-01]

```
----MEIMTHI--CNDLARVL-----ARIARKKALEIQVPMV-----
-----IAFADA----RGELVH----
-----FQRMDKALPVSSDIAV-----NK
AFTAAALRMS-----THKV-----
-----
```

```
-----G
R--LV--EQGQE-LA-----GLELTNKGKMVIFGG----GLPLSLDG
EVVGSVGVSGGSVAQDMVVAQAAANALEQMEKTAQAL-----LP--ILPKTL
EDLTDLANKIQDLG-----RKEGADSDILEGAFYLI-----
-----
```

>gi++|150018877|ref|YP\_001311131.1| hypothetical protein cbei\_4065 [Clostridium beijerinckii NCIMB 8052]

```
-MINEELIKKL-----SSDL--ISSIKTPKLTLMKAKEILEKAERKAESINVP-VV---
-----IALVDD----GGNLIA----
-----QHRMDNSILISIKVSF-----NK
AYTALALKMS-----TERF-----
-----
```

```
-----N
E--LA--LPGKP-LY-----GLENTGHGELCILGG-----
-----GIPIVSN-----GNII-----GA-----IG--VSGGSI
DEDIQIA--QAALK-----
-----
```

>gi++|218782810|ref|YP\_002434128.1| ATP/cobalamin adenosyltransferase [Desulfatibacillum alkenivorans AK-01]

```
----MSIYTGG--GDKGKTSL--LSGERVSKADPRV--EAYGTLDELTAQLGVC-RA-QL
NQ-----FPAC-----APFAGMIVNIQ--RDLFRV----GMQLSSSPKY
WSKL-----SAPINSDDIQSLEQAI-----DA
LEKAFG-LPG-----FFVS-----
-----
```

```
-----P
G--RT--LAGAS-LHVAR-----TICRRAERQAWAAAG----DVES----
-----YALILKYI-----NRLS-----DL-----LF--SLSWTA
E--IRIL--LTEEL-----SHGNHDAHL-----
-----
```

>gi++|29376192|ref|NP\_815346.1| ATP:cob(I)alamin adenosyltransferase, putative

SupplementalMultipleSequenceAlign.txt

[Enterococcus faecalis V583]

-----MKIYTKT--GDKGMTKL--VGSSTVAKSDRV--ESYGTIDELNSWVGYI-IS--Q  
LP-----QENQ-----EIK--EELALQ--HLLFDA-----GTDLST--PI  
EAQR-----PFKLQKASVHWLEQRI-----DF  
YTAQSP-DID-----RFIL-----

-----P  
G--GT--PAASM-VHVAR-----TIARRAERIIIVRLNW----TAKI----  
-----NEEVLIPT-----NRLS-----DY-----FY--ALARCL  
N--VQAQ--RPDVF-----  
-----YERSEMVFHKIKEDGL-----

>gi++|125717377|ref|YP\_001034510.1| ATP:cob(I)alamin adenosyltransferase, putative  
[Streptococcus sanguinis SK36]

-----MQLYTKT--GDKGLTKL--VGGQSVAKDAERV--NAYGTIDELNSWIGYT-IT--K  
LD-----KDDK-----LR--DELLQLQ--HYLFDC-----GSDLST--P-  
QGVY-----PYKVDQQLIDWIEERI-----DT  
YAEIPS-ALE-----RFIL-----

-----P  
G--GD--EIASM-IHVAR-----TIARRAERHIVGAMW----TTEI----  
-----NNNVLIFV-----NRLS-----DY-----FF--ALARVI  
N--FTKN--QEDIA-----  
-----YERGAKVFHNITKADVERWASKRQ--

>gi++|158319833|ref|YP\_001512340.1| ATP--cobalamin adenosyltransferase [Alkaliphilus  
oremlandii OhILAs]

-----MQIYTRT--GDKGYTRI--IGGTKLAKDSERI--KAYGTIDELNSFVGYA-IT--L  
IK-----NNDK-----LK--KELIQIQ--QYLFDC-----GNDLAM--P-  
RGKG-----TYRVTPDLTEWIEGCI-----DA  
HVAIPR-EVE-----SFIL-----

-----P  
G--GS--PAASI-LHICR-----TVARRAEREIVTFQW----TNDM----  
-----NEEVLIPT-----NRLS-----DY-----FF--SVARVA  
N--ANEG--IEDVL-----  
-----YERSGKVFHMEKKEHLQ-----

>gi|152972008|ref|YP\_001337154.1| hypothetical protein KPN\_03492 [Klebsiella  
pneumoniae subsp. pneumoniae MGH 78578]

---MYRIYTRT--GDKGTTAL--YGGSRIEKDHIRV--EAYGTVDELISQLGVC-YA---  
-----TTRD-----AGLRESLHHIQ--QTLFVL-----GAELASDARG  
LTRL-----SQTIGEEEEITALERLI-----DR  
NMAESG-PLK-----QFVI-----

-----P  
G--RN--LASAQ-LHVAR-----TQSRRLERLLTAMDR----AHPL----  
-----RDALKRYS-----NRLS-----DA-----LF--AMARIE  
E-----  
-----TRPDACA-----

>gi|206579020|ref|YP\_002236497.1| cob(I)yrinic acid a,c-diamide adenosyltransferase  
[Klebsiella pneumoniae 342]

---MYRIYTRT--GDKGTTAL--YGGSRIEKDHIRV--EAYGTVDELISQLGVC-YA-TT  
-----RDAG-----LR--ESLHHIQ--QTLFVL-----GAELASDARG  
LTRL-----SQTIGEEEEITALERLI-----DR  
NMAESG-PLK-----QFVI-----

SupplementalMultipleSequenceAlign.txt

```
-----P
G--KN--LASAQ-LHVAR-----TQSRRLERLLTATDR---VHPL----
-----RDALKRYS-----NRLS-----DA-----LF--SMARIE
E-----
-----TRPDACA-----
-----
```

>gi|18309916|ref|NP\_561850.1| hypothetical protein CPE0934 [Clostridium perfringens str. 13]

```
-----
----MNIYTKT--GDKGTTSL--FGGSRVDKCDLRV--DAYGTIDELISFIGLA-YA---
-----ELTD-----EEEKEILNKIQ--KELFML----GAELASDEKG
LELL-----KDKIQSEHIEYLEKLI-----DK
YMGIAG-PLT-----AFVI-----
-----
```

```
-----P
G--KN--KPSAT-LHVAR-----TVARRGERIMTALNE---VQPL----
-----REEIKKYI-----NRLS-----DT-----LF--ALARYY
E--EK-----
-----
```

>gi|110802632|ref|YP\_698332.1| ATP:cob(I)alamin adenosyltransferase, putative [Clostridium perfringens SM101]

```
-----
----MNIYTKT--GDKGTTSL--FGGSRVDKCDLRV--DAYGTIDELISFIGLA-YA---
-----ELTD-----EEEKEILNKIQ--KELFML----GAELASDEKG
LELL-----KDKIQLENIIEYLEELI-----DR
YMGIAG-PLT-----AFVI-----
-----
```

```
-----P
G--KN--KPSAT-LHVAR-----TVARRGERIMTALNE---VQPL----
-----REEIKKYI-----NRLS-----DT-----LF--ALARYY
E--EK-----
-----
```

>gi|187933018|ref|YP\_001886289.1| ATP:cob(I)alamin adenosyltransferase [Clostridium botulinum B str. Eklund 17B]

```
-----
----MKIYTKT--GDKGTTAL--YGGSRVDKDSLVRV--EAYGTVDEVISFIGLA-CA---
-----EIED-----KEEKNALEEIQ--KCLFVL----GAELASDEKG
LTYL-----KEIITDEDIEKLEVL-----DK
YMELAG-PFK-----GFVT-----
-----
```

```
-----P
G--KN--KISAA-LHVAR-----TVTRRAERRIATLCK---EENV----
-----REQVKMYV-----NRLS-----DV-----LF--AFARYE
E--EK-----
-----
```

>gi|110798903|ref|YP\_695624.1| putative ATP:cob(I)alamin adenosyltransferase [Clostridium perfringens ATCC 13124]

```
-----
----MNIYTKT--GDKGTTSL--FGGSRVDKCDLRV--DAYGTIDELISFIGLA-YA---
-----ELTD-----EEEKEILNKIQ--KELFML----GAELASDEKG
LELL-----KDKIQLEHIEYLEKLI-----DK
YMGIAG-PLT-----AFVI-----
-----
```

```
-----P
G--KN--KPSAT-LHVAR-----TVARRGERIMTALNE---VQPL----
-----REEIKKYI-----NRLS-----DT-----LF--ALARYY
E--EK-----
-----
```

>gi|188590374|ref|YP\_001921317.1| DhaG protein [Clostridium botulinum E3 str. Alaska

SupplementalMultipleSequenceAlign.txt

E43]

```

-----MKKL--NEIKQLSL-----EIVKEMAKA-----AEEKAASMNVPI-----
-----FAAVDA-----GANLML-----
-----MHRMEDAFITSIDIAI-----NK
AYTAACLKQG-----SHGI-----
-----A
E--CV--QPGQS-LY-----GLQLTNNCRIVPFGG-----
-----GFPIIVD-----GSVV-----GA-----VG--VSGGTV
EEDMAIAQAAVDAF-----NK-----

```

>gi|110799882|ref|YP\_695625.1| hypothetical protein CPF\_1179 [Clostridium perfringens ATCC 13124]

```

-----MKKL--NDVKELSL-----EIVKEMAKA-----AEAKACEMNVPI-----
-----FAAVDA-----GANLML-----
-----MHRMEDAFLTSIDIAI-----NK
AYTAACLKQG-----SHEI-----
-----A
E--CV--QPGQS-LY-----GLQLTNNCRIVPFGG-----
-----GFPIIV-D-----GKVV-----GA-----VG--VSGGTV
EEDMAIAQAAVDCF-----NNK-----

```

>gi|18309917|ref|NP\_561851.1| hypothetical protein CPE0935 [Clostridium perfringens str. 13]

```

-----MKKL--NDVKELSL-----EIVKEMAKA-----AEAKACEMNVPI-----
-----FAAVDA-----GANLML-----
-----MHRMEDAFLTSIDIAI-----NK
AYTAACLKQG-----SHEI-----
-----A
E--CV--QPGQS-LY-----GLQLTNNCRIVPFGG-----
-----GFPIIV-D-----RKVV-----GA-----VG--VSGGTV
EEDMAIAQAAVDCF-----NNK-----

```

>gi|150009910|ref|YP\_001304653.1| ATP:cob(I)alamin adenosyltransferase, putative [Parabacteroides distasonis ATCC 8503]

```

-MKKSIIYTRT--GDKGTTSL--VGGQVRKAHDRI--ESYGTVDLNSFIGLL-IT-AL
-----NDEK-----DT--DFLSFIQ--HKLFTI----GSYLAT--DQ
ATTELKI-----ESKVTPEIERIEREI-----DR
LDNELP-KMH-----AFIL-----
-----P
G--GC--RSAAL-AHVCR-----TVCRAERQIYRLAE-----NCPV-----
-----EPPVLIFM-----NRLS-----DY-----FF--VLARKE
C--INNN--GKEII-----WDYTCV-----

```

>gi|163848992|ref|YP\_001637036.1| ATP--cobalamin adenosyltransferase [Chloroflexus aurantiacus J-10-f1]

```

----MKIYTRT--GDAGETGL--FGGQVRKDDLRLV--QAYGTVDECNAALGVA-RA----
-----AGPD-----PALDAVLAVVQ--NQLFVV-----GADLAS--PG
ESPY-----IPRVSALTSFLEEQI-----DA
MEAEELS-PLK-----QFIL-----

```

SupplementalMultipleSequenceAlign.txt

```
-----P
G--GH--PVAAH-LHLAR-----TICRRAERVVTLAT---EEEV---
-----RPEILTYL-----NRLS-----DF-----LF--VAARIA
N--ARAG--VSDVP-----
-----WQK-----
-----
```

>gi|34540854|ref|NP\_905333.1| ATP:cob(I)alamin adenosyltransferase, putative [Porphyromonas gingivalis w83]

```
-----
----MIYTRT--GDKGTTSL--VGGERVPKYHQRL--ECYGTIDELNSFIGLL-MS-ED
-----LPEE-----DR--DFLRTIQ--HKLFTV---GSYLAT--NQ
ESRELMV-----ESRVHPETIERVEQEI-----DR
LDNAIP-KMT-----AFIL-----
-----
```

```
-----P
G--GS--RSASL-AHVCR-----TVCRRRAERHIYRLSE---EALV---
-----EEPVMRYI-----NRLS-----DY-----FF--ALARKE
V--WRTT--GGEII-----
-----WDKTCD-----
-----
```

>gi|188995085|ref|YP\_001929337.1| probable ATP:corrinoid adenosyltransferase [Porphyromonas gingivalis ATCC 33277]

```
-----
--MSKSMIYTRT--GDKGTTSL--VGGERVPKYHQRL--ECYGTIDELNSFIGLL-MS-ED
-----LPEE-----DR--HFLRTIQ--HKLFTV---GSYLAT--NQ
ESRELMV-----ESRVHPETIERVEQEI-----DR
LDNAIP-KMT-----AFIL-----
-----
```

```
-----P
G--GS--RSASL-AHVCR-----TVCRRRAERHIYRLSE---EALV---
-----EEPVMRYI-----NRLS-----DY-----FF--ALARKE
V--WRTT--GGEII-----
-----WDKTCD-----
-----
```

>gi|187934031|ref|YP\_001886288.1| DhaG protein [Clostridium botulinum B str. Eklund 17B]

```
-----
-----MKKL--NEIKQLSL-----EIVKEMAKA-----AEEKAASMNVV-VI---
-----FAAVDA-----GANLML-----
-----MHRMEEAFITSIDIAI-----NK
AYTAACLKQG-----SHGI-----
-----
```

```
-----A
E--CV--QPGES-LY-----GLQLTNNCRIVPFGG-----
-----GLPIIVD-----GKVV-----GA-----VG--VSGGTV
EEDMAIAQAADF-----
-----NK-----
-----
```

>gi|188589368|ref|YP\_001921318.1| ATP:cob(I)alamin adenosyltransferase [Clostridium botulinum E3 str. Alaska E43]

```
-----
----MKIYTKT--GDKGTTAL--YGGSRVDKDSLRLV--EAYGTVDEVISFIGLA-YA---
-----ESED-----KEEKDALQEIQ--KKLFVL---GAELASDEKG
LTYL-----KEVITDEDIEKLEVL-----DK
YMELAG-PFN-----GFVT-----
-----
```

```
-----P
G--KN--KISAA-LHVAR-----TVTRRAERIIATLSK---EEHI---
-----NEPVKMYI-----NRLS-----DV-----LY--AFARYN
E--EK-----
-----
```

>gi|150390664|ref|YP\_001320713.1| ATP--cobalamin adenosyltransferase [Alkaliphilus

SupplementalMultipleSequenceAlign.txt

metalliredigens QYMF]

```
-----MKIYTKT--GDKGQTSL--YDGKRVKDDIRV--ESYGTIDELNSALGFA-RT---
-----FVED-----DEISNYIFQIQ--RELFDV-----AGELAT--ED
KEKF-----PEKIEQSHTKCLEEMI-----DY
FLSKME-LMD-----RFII-----
-----P
G--TN--RASAS-LHVAR-----TICRRAERRILTLQK----EVYV----
-----SVNLVKYV-----NRLS-----DA-----IY--AMARYL
E-----SDLK-----
-----YVEFKK-----
```

>gi|116872582|ref|YP\_849363.1| ATP:cob(I)alamin adenosyltransferase, putative [Listeria welshimeri serovar 6b str. SLCC5334]

```
-----MRIYTKT--GDKGMTRI--IGGSKVSKDNVRI--DAYGTLDELNSLIGFTITT---
-----LGDE-----PEIQAELEQIQ--QQLFDA----GGDLAT--EE
GKR-----DYKLTSEPVAWLEDRI-----DI
YADEPP-EIE-----KFIL-----
-----P
G--GT--QAASL-LHMAR-----TVTRRAEREIVGMLK----IAST----
-----NQEVLKYV-----NRLS-----DY-----FF--AVARVV
N--YRAG--ETDIF-----
-----YKNSLVFRNKKK-----
```

>gi|150024678|ref|YP\_001295504.1| hypothetical protein FP0583 [Flavobacterium psychrophilum JIP02/86]

```
-----MKVYTKT--GDKGTTAL--FGGTRVPKDHRSRI--ESYGTVDELNSYIGLI-RD---
-----QEIN-----QHYKNILIEIQ--DRLFTV----GAILAT--PP
EKEVMKNGQLRLQ--KLGIIESDIELLENEI-----DT
MENSLP-QMT-----HFVL-----
-----P
G--GH--TTVSY-CHIAR-----CVCRAERLAVHLSH----NEPV----
-----ADIAIKYL-----NRLS-----DY-----LF--VLARKL
T--SDLH--ADEVK-----
-----WIPRK-----
```

>gi|152972006|ref|YP\_001337152.1| hypothetical protein KPN\_03490 [Klebsiella pneumoniae subsp. pneumoniae MGH 78578]

```
-----MMNKS--QQVQTITL-----AAAQQM--AEAVEKKAEEINVAVV-----
-----FSVVDH----GGNTLL----
-----IQRMDEAFVSSCDISL-----NK
AWSACSLKQG-----THEI-----
-----T
S--AV--QPGQS-LY-----GLQLTNQQRRIIFGG-----
-----GLPVIFN-----EQVI-----GA-----VG--VSGGTV
EQDQLLAQCALDCF-----
-----SAL-----
```

>gi|206580189|ref|YP\_002236500.1| hypothetical protein KPK\_0625 [Klebsiella pneumoniae 342]

```
-----MMNKS--QQVQTITL-----AAAQQM--AAAVEKKATEINVAVV-----
-----FSVVDR----GGNTLL----
-----IQRMDEAFVSSCDISL-----NK
AWSACSLKQG-----THEI-----
```

SupplementalMultipleSequenceAlign.txt

```
-----T
S--AV--QPGQS-LY-----GLQLTNQQRRIIFGG-----
-----GLPVIFN-----EQVI-----GA-----VG--VSGGTV
EQDQLLAQCALDCF-----
-----SAL-----
-----
```

>gi|53715559|ref|YP\_101551.1| hypothetical protein BF4276 [Bacteroides fragilis YCH46]

```
-----
--MKKSLVYTKT--GDKGTTGL--IGGTRVPKTHIRL--EAYGTVDELNSNLGLL-AT-YL
-----MDEH-----DL--NFVQSVQ--DKLFAI----GSHLAT--DQ
EKVQLND-----VSIITPAEVEAIEREI-----DA
ADEILP-PLH-----SFII-----
-----
```

```
-----P
G--GS--RGS AV-CHVCR-----TVCRR AERRILALSE----SCTI----
-----SADLLAYI-----NRLS-----DY-----LF--VLSRKM
N--FNEG--KDEIF-----
-----WNN SCK-----
-----
```

>gi|46199862|ref|YP\_005529.1| hypothetical protein TTC1560 [Thermus thermophilus HB27]

```
-----
----MKIYTRT--GDAGETGL--YGAERVVKAHPRV--EAYGTVDEANSAIGLARSL----
-----LPGK-----HRDLHDLLERLQ--NALFDL----GADLAT--RM
GSPYEKN-----IARMDAEDVRALEEAI-----DR
YQEESP-PFQ-----GFIL-----
-----
```

```
-----P
G--GH--PAAAA-LHLAR-----TVVRR AERKAVALSR----EEPV----
-----NPEVIRYL-----NRLS-----DL-----LF--VLARVV
N--AREG--IKEEG-----
-----WLVKKRR-----
-----
```

>gi|158320386|ref|YP\_001512893.1| ATP--cobalamin adenosyltransferase [Alkaliphilus oremlandii OhILAs]

```
-----
----MKIYTKT--GDRGETSL--YDGKRVKDDIRV--ESYGTIDELNSALGLA-RN----
-----FIED-----QEIVEIIYGIQ--RELFNV----AGELAT--EN
TDNF-----KGKVD ETQIQALEKII-----DD
YLEKMP-KMD-----KFII-----
-----
```

```
-----P
G--SN--KASAS-LHVAR-----TVCRR AERRILTFSR----EEDV----
-----SPLLIK YV-----NRLS-----DT-----IY--ALARYL
E-----SDLR-----
-----YVDFKK-----
-----
```

>gi|83816164|ref|YP\_445418.1| ATP:cob(I)alamin adenosyltransferase, putative [Salinibacter ruber DSM 13855]

```
-----
--MSKRIYTRT--GDDGTTSL--FGGERVKGKNPRI--DAYGTVDETNSIVGLA-RSHLE
G-----EPGQ-----ETLDPVLGDVQ--EELFVL----GADLAT--PM
DAKPV-----VERIEDAHIEALEERI-----DR
FEADLP-SLE-----RFIL-----
-----
```

```
-----P
G--GA--PAGAS-LHSAR-----TVCRR AERRSVEAKT----STPI----
-----NEQVIVYL-----NRLS-----DL-----LF--VLARWA
N--RQAG--VREDT-----
-----WSPGSGGGDGASADPS-----
-----
```

>gi|194364451|ref|YP\_002027061.1| ATP/cobalamin adenosyltransferase



SupplementalMultipleSequenceAlign.txt

[Stenotrophomonas maltophilia R551-3]

```
-----M
GHRLSRIYTRT--GDDGSTGL--GDGQRVAKDDARV--ASYGTVDEANAALGLL-LA--A
P-----LPED-----VR--ALVVHLQ--HQLFDL-----GAELCI--PG
-----HAAIHAADVSALEQQL-----DH
YNAGLP-MLK-----EFIL-----
```

```
-----P
A--GG--EAAAR-CHLAR-----TIVRRAERETVTLAR----HEAV----
-----RSEALQYL-----NRLS-----DL-----LF--VLARVL
A--RADG--HGEAL-----
-----WQPQRQR-----
```

>gi|118472987|ref|YP\_885926.1| PduO protein [Mycobacterium smegmatis str. MC2 155]

```
-----
-----MGALSL--STAQKVVD-----AAIEKANEIGQPMNIA-----
-----VVDD-----GGHLVA-----
-----FARMDGAIKASIDISI-----RK
ARTSILMNL-----TSAL-----
```

```
-----M
D--VA--QPGGE-LY-----GLEQLSGGLVLFGGG-----
-----LLLERD-----GEVI-----GA-----IG--VSAGSV
EQDVKVAEAGVAAL-----
```

>gi|146302729|ref|YP\_001197320.1| ATP--cobalamin adenosyltransferase [Flavobacterium johnsoniae UW101]

```
-----
----MKVYTKT--GDKGTTAL--FGGTRVPKDHIRI--DSYGTVDELNSYIGLI-RD---
-----QEID-----SHYKTILIEIQ--DRLFTV-----GAILAT--PQ
EKEVLKNGELRLK--NLGIIDSIELENEI-----DK
MEESLP-QMT-----HFVL-----
```

```
-----P
G--GH--PTVSH-CHIAR-----CICRRAERLAVHLSH----NEHV----
-----PEIAIMYL-----NRLS-----DY-----LF--VLARKL
S--SDLK--AEEVK-----
-----WIPRK-----
```

>gi|190572868|ref|YP\_001970713.1| putative cobalamin adenosyltransferase [Stenotrophomonas maltophilia K279a]

```
-----M
GHRLSRIYTRT--GDDGSTGL--GDGQRVAKDDARV--ASYGTVDEANAALGLL-LA-VP
P-----LPED-----VR--ALVVHLQ--HQLFDL-----GAELCI--PG
-----HAAIHAADVSALEQQL-----DH
YNADLP-MLK-----EFIL-----
```

```
-----P
A--GG--EAAAR-CHLAR-----TIVRRAERETVTLAR----HEAV----
-----RSEALQYL-----NRLS-----DL-----LF--VLARVL
A--RADG--QGEAL-----
-----WQPQRQR-----
```

>gi|120434897|ref|YP\_860583.1| cobalamin adenosyltransferase family protein [Gramella forsetii KT0803]

```
-----
----MKIYTKT--GDKGTTSL--FGGTRVPKHHIRI--ESYGTVDELNSHIGLL-RD-QD
-----TDKQ-----TK--EFLTEIQ--DRLFTI-----GAILAT--DP
EKATLKNKGERLN--IPKVSDEIEKLEKGI-----DK
MNEELP-EMT-----HFIL-----
```

-----P

SupplementalMultipleSequenceAlign.txt

G--GH--QSVSF-CHIAR-----CVCRRRAERLSSALYD----IETF-----  
 -----DEKVLIIYL-----NRLS-----DY-----LF--VLARKL  
 S--KQLQ--AEEIQ-----  
 -----WIPKKS-----  
 -----

>gi|15806642|ref|NP\_295361.1| hypothetical protein DR\_1638 [Deinococcus radiodurans R1]

----MKLYTRT--GDQGQTGL--YGADRVSKAHPRV--EAYGTVDELNSALGLA-RA---  
 -----HSTD-----AALDTDLEYLQ--NALFDV----GADLAT--RS  
 GTPYEKN-----LVRIDAEDVAFLEAMI-----DR  
 YQEAAP-PFT-----GFVH-----  
 -----

-----P  
 G--GT--PAAAA-LQLAR-----AVARRAERDVIRLLD----VEEA----  
 -----NAQVQVYL-----NRVS-----DL-----LF--IMARAV  
 N--ARSG--LSEEA-----  
 -----WTVKKRR-----  
 -----

>gi|94984773|ref|YP\_604137.1| cobalamin adenosyltransferase [Deinococcus geothermalis DSM 11300]

----MKLYTRT--GDKGTTGL--YGADRVSKAHPRV--EAYGTVDELNSVVGLA-RAHNA  
 RS-----HQP-----SGLDADLEYLQ--NALFDL----GADLAT--RQ  
 DSPYAKN-----LSRMDAQDVAFVEAMI-----DR  
 YQEGAP-PFT-----GFVH-----  
 -----

-----P  
 G--GT--PTAAA-LHVAR-----TVARRAEREVIRLAQ----EEEEI----  
 -----GEHVQVYL-----NRVS-----DL-----LF--VMARAA  
 N--QAAG--ISEQA-----  
 -----WTVKKRR-----  
 -----

>gi|16800241|ref|NP\_470509.1| hypothetical protein lin1172 [Listeria innocua Clp11262]

----MRIYTKT--GDKGMTRI--IGGSKVSKDNIRI--NAYGTLDELNSLIGYT-IT--T  
 LG-----NEPE-----IQ--AELEQIQ--QQLFDA----GGDLAT--E-  
 EGKR-----DYKLTAEPVAWLEDRI-----DI  
 YADEPP-EIE-----KFIL-----  
 -----

-----P  
 G--GT--QAASL-LHMAR-----TVARRAEREIVGMLK----IAST----  
 -----NQEVLKYV-----NRLS-----DY-----FF--AVARVV  
 N--YRAG--ETDIF-----  
 -----YKNSLVFRNKKK-----  
 -----

>gi|220918720|ref|YP\_002494024.1| ATP/cobalamin adenosyltransferase [Anaeromyxobacter dehalogenans 2CP-1]

----MKIYTKT--GDAGETGL--FGGPRVRKSDARV--EAYGEVDELNACLGTV-RA---  
 -----VVED-----PEIDAQLARIQ--DELFCV----GAELAT--PH  
 GEKARSA-----IPAVEPRWAERLEAAI-----DA  
 WEAELP-PLR-----QFVL-----  
 -----

-----P  
 G--GT--RTAAQ-LHLAR-----CVCRRRAERRVVALAA----EAEV----  
 -----SPVALAYL-----NRLS-----DL-----LF--VAARVA  
 N--HRAR--KPETA-----  
 -----WDPHRER-----  
 -----

>gi|197123951|ref|YP\_002135902.1| ATP/cobalamin adenosyltransferase [Anaeromyxobacter sp. K]

SupplementalMultipleSequenceAlign.txt

-----MKIYTKT--GDAGETGL--FGGPRVRKSDARV--EAYGEVDELNACLGTV-RA---  
-----LVED-----PEIDAQLARIQ--DELFCV----GAELAT--PH  
GEKARSA-----IPAVEPRWAERLEAAI-----DA  
WEAELP-PLR-----QFVL-----

-----P  
G--GT--RTAAQ-LHLAR-----CVCRRRAERRVVALAA----EAEV----  
-----SPVALAYL-----NRLS-----DL-----LF--VAARVA  
N--HRAR--KPETA-----  
-----WDPHRER-----

>gi|16803249|ref|NP\_464734.1| hypothetical protein lmo1209 [Listeria monocytogenes EGD-e]

-----MRIYTKT--GDKGMTRI--IGGSKVSKDNIRI--DAYGTLDELNSLIGYTITT---  
-----LGAE-----PEIQAELEIQI--QQLFDA----GGDLAT--EE  
GKR-----AYKLTSEPVAWLEDRI-----DI  
YADEPP-EIE-----KFIL-----

-----P  
G--GT--QAASL-LHMAR-----TVTRRAEREIVGMLK----IASS----  
-----NEEVLYKVV-----NRLS-----DY-----FF--AVARVV  
N--YRAG--ETDIF-----  
-----YKNSSELVFRNKKK-----

>gi|46907428|ref|YP\_013817.1| ATP:cob(I)alamin adenosyltransferase, putative [Listeria monocytogenes str. 4b F2365]

-----MRIYTKT--GDKGMTRI--IGGSKVSKDNIRI--DAYGTLDELNSLIGYTITT---  
-----LGAE-----PEIQAELEIQI--QQLFDA----GGDLAT--EE  
GKR-----AYKLTSEPVAWLEDRI-----DI  
YADEPP-EIE-----KFIL-----

-----P  
G--GT--QAASL-LHMAR-----TVTRRAEREIVGMLK----IASS----  
-----NEEVLYKVV-----NRLS-----DY-----FF--AVARVV  
N--YRAG--EKDIF-----  
-----YKNSSELVFRNKKK-----

>gi|85375662|ref|YP\_459724.1| hypothetical protein ELI\_14175 [Erythrobacter litoralis HTCC2594]

MVRLNKIYTRT--GDDGTTGL--VDGSRRRAKHDVRM--TAIGVVDEANSAIGLA-AV---  
-----SLER-----SDHAPMLFRIQ--NDLFDL----GADLAT--PG  
EDFEPGEM-----TLRMVPEQVDWIEQRI-----DA  
LNERLE-PLA-----SFVL-----

-----P  
G--GT--EAAAR-LHVAR-----ATTRAAERAMAALAQ----SEPV----  
-----NPAALAYI-----NRLS-----DL-----LF--VLARVA  
N--DDG--KTDVN-----  
-----WVPGANR-----

>gi|51891750|ref|YP\_074441.1| putative cobalamin adenosyltransferase [Symbiobacterium thermophilum IAM 14863]

-----MRPMRIYTRT--GDKGDTSL--RWGERVPKNALRV--EYVGTVDANAHVGMMA-VAMME  
-----GPAF-----AAVRDVLLRVQ--NELFYV----GADLAT--PP  
NRDRGE-----QPRITQASVDALEADI-----DR  
LEAGLP-PLR-----NFVL-----

-----P

SupplementalMultipleSequenceAlign.txt

G--GS--APAAA-LHVAR-----TVVRRRAERLLVSLMQ----QEPV-----  
 -----DPALLRYL-----NRLS-----DL-----LF--VAARAA  
 N--QAAG--HGDVL-----  
 -----VDWNRSS-----  
 -----

>gi|150004033|ref|YP\_001298777.1| hypothetical protein BVU\_1468 [Bacteroides vulgatus ATCC 8482]

-----  
 -MKKSMIYTKT--GDKGTTSL--VGGTRVPKTHIRL--EAYGTVDELNSYLGLL-QT-YL  
 -----TDEE-----DK--QIIFRIQ--NKLFSV----GSYLAT--DQ  
 TQTKLRM-----ESRIEDEDIRMLEQAI-----DV  
 IDNELP-PLN-----AFIL-----  
 -----

-----P  
 G--GD--RGA AV-GHICR-----TVCRRRAERRILALAE----ECDI-----  
 -----DARVTAFV-----NRLS-----DY-----LF--ILTRKL  
 N--HLTK--TDEIF-----  
 -----WDKSCK-----  
 -----

>gi|156743715|ref|YP\_001433844.1| ATP--cobalamin adenosyltransferase [Roseiflexus castenholzii DSM 13941]

-----  
 -MTGMKIYTRT--GDEGETGL--WGGLRVPKDAPRV--QAYGTVDECNAAIGVA-RS---  
 -----AGVD-----TYLDALLARVQ--SDLFVV----GADLAT--PG  
 EAAN-----IPRIGADAVQALEQAI-----DE  
 LEAQL-PLR-----QFIL-----  
 -----

-----P  
 G--GA--PSAAY-LHLAR-----TICRRRAERRVVTLSR----SEPV-----  
 -----NPQITIYL-----NRLS-----DF-----LF--VAARCA  
 N--ASAG--VPDVP-----  
 -----WESPRMRKEAKDE-----  
 -----

>gi|159900211|ref|YP\_001546458.1| ATP--cobalamin adenosyltransferase [Herpetosiphon aurantiacus ATCC 23779]

-----  
 MPRITKVYTRT--GDNGTTAL--GGGQRPKESLRV--TAFGTVDELNSNLGVA-LA-VG  
 -----VSER-----LQ--APLQAIQ--NELFHL----GSDLCM--LE  
 EDKQKWP-----IPQIEARHIEALEQLM-----DE  
 LMDAVG-PL------NFIL-----  
 -----

-----P  
 G--GS--Q TSAH-LHVAR-----TVCRRRAERDVVALSR----EETI-----  
 -----GSFVIKYL-----NRLS-----DA-----LF--VMARYE  
 N--FVRN--VPDVI-----  
 -----WDSRA-----  
 -----

>gi|160902345|ref|YP\_001567926.1| ATP--cobalamin adenosyltransferase [Petrotoga mobilis SJ95]

-----  
 ---MVSITTKT--GDKGETSL--WSGERVSKDDL RV--EAYGTVDELNSFLSEA-SH-YL  
 -----KSHE-----VK--KIINEVQ--NNLFKV----AGELAS--KS  
 QTY-----KYPIQEEDALKITNYV-----YE  
 FENRLD--LK-----GFVI-----  
 -----

-----P  
 G--RT--LQSAK-LDICR-----TIARRAERRIIALDK----KEPV-----  
 -----SEPLKKYA-----NRLS-----DL-----LF--VLARFE  
 EYIE-DK--IEFKK-----  
 -----W-----  
 -----

>gi|219847175|ref|YP\_002461608.1| ATP/cobalamin adenosyltransferase [Chloroflexus aggregans DSM 9485]

SupplementalMultipleSequenceAlign.txt

-----MKIYTRT--GDTGETGL--FGGPRVRKDVLRV--EAYGTADECNSAIGVA-RA---  
-----AGPD-----PMLDAVLAEVQ--NQLFVV----GADLAS--PN  
DSPY-----IPRVSATMTAFLEEIQI-----DA  
METELA-PLQ-----QFIL-----

-----P  
G--GT--TVAAY-LHLAR-----TICRRAERVVVSLAA---EEAI---  
-----NPELLPYL-----NRLS-----DF-----LF--VAARIA  
N--ARAG--VDDVP-----  
-----WRKP-----

>gi|170740251|ref|YP\_001768906.1| ATP--cobalamin adenosyltransferase  
[Methylobacterium sp. 4-46]

-----  
MVVLNRIYTRT--GDAGTTAL--ASGERRSKADLRI--ETYGTVDETNAACLGLARQH---  
-----TTGE-----LDAMLSRAQ--NDLFDL----GADLAT--PE  
SDQPLPYE-----PLRLVAAQVERVEREI-----DA  
LNAALT-PLR-----SFVL-----

-----P  
G--GT--PAAAA-LHLAR-----TVCRRAERLAVALAA--TPGERV---  
-----SPVAIQYL-----NRLS-----DF-----LF--VASRVA  
N--DGG--ARDVL-----  
-----WVPGQNRA-----

>gi|163939392|ref|YP\_001644276.1| ATP--cobalamin adenosyltransferase [Bacillus  
weihenstephanensis KBAB4]

-----  
----MKLYTKT--GDKGETSV---IGGRVDKDHIRV--EAYGTIDEANSHIGYA-MS-KL  
QE-----ECF-----RNIYNELENIQ--HELFDL----GGDLAI--V-  
EKKI-----PYKVTIEMVEYLERRI-----DS  
YTEEAP-PLE-----RFIL-----

-----P  
G--GS--EISAA-LHIAR-----TVIRRAERCIVSLQK---EGET---  
-----NEIVLKYY-----NRLS-----DY-----LF--ALARVI  
N--ARLQ--VKDVE-----  
-----YNRSALVFRNKKEEKEVE-----

>gi|197106610|ref|YP\_002131987.1| hypothetical protein PHZ\_c3149 [Phenylobacterium  
zucineum HLK1]

-----  
MVTLNRIYTRT--GDQGTTRL--ATGEPVSKAAARV--EAYGAVDETNAACLGMARVH---  
-----TAAD-----PELDTLLARLQ--NELFDL----GADLAT--PP  
RPDEAEGA-----VLRVSDRQVERLEAEI-----DA  
LNDRLP-PLQ-----SFIL-----

-----P  
A--GT--PAAAA-LHLAR-----TVCRRAEREAVRLVE---AGETV---  
-----SPAALRYL-----NRLS-----DL-----LF--VAARAA  
N--DLG--RSEVF-----  
-----WKSGATR-----

>gi|114327537|ref|YP\_744694.1| protein glcG [Granulibacter bethesdensis CGDNIH1]

-----  
-----MITL-----EDAVRI----ATAAEKHARKIGQP-MN---  
-----IAIVDG----GGNLKL---  
-----HHRMDDAWLGSIDISI-----NK  
AFTARAFDIS-----TKDL-----

-----A  
G--NA--QPGQQ-FY-----GIQQSNHGRVMIFAG-----

SupplementalMultipleSequenceAlign.txt

-----GIPLRRD-----GKVV-----GG-----VG--ISGGSG  
 EQDQSVAEAAAAAF-----  
 -----EQTGAKPPAPKTKA-----  
 -----

>gi|108760949|ref|YP\_634078.1| putative ATP:cob(I)alamin adenosyltransferase  
 [Myxococcus xanthus DK 1622]

-----  
 ----MKIYTKS--GDAGETGL--FGGGRVAKDDVRV--DAYGEVDELNATLGLV-RS---  
 -----FEGP-----PDVDALLHRLQ--DQLFTV----GAVLAT--PE  
 GTKASAH-----IPELKAEWAEDMERAI-----DG  
 FEAELP-PMT-----HFIL-----  
 -----  
 -----P  
 G--GT--QAASA-LHLAR-----TVCRRRAERTVPLLR----EGKI----  
 -----PKAVVYVL-----NRLS-----DL-----LF--VLARVV  
 N--HRAS--VEDVK-----  
 -----WIPAKPSK-----  
 -----

>gi|42780677|ref|NP\_977924.1| ATP:cob(I)alamin adenosyltransferase, putative  
 [Bacillus cereus ATCC 10987]

-----  
 ----MKLYTKT--GDKGTTSV---IGGRVDKDNIRV--EAYGTIDEANSHIGYAMTK---  
 -----LQGG-----SFGDIYNELETIQ--HELFDG----GGDLAI--VG  
 EKI-----PYKVKIEMVENLESRI-----DS  
 YIEEAP-PLE-----RFIL-----  
 -----  
 -----P  
 G--GS--ESAAA-IHIAR-----TVVRRRAERCIVSLQK----EGEI----  
 -----NEVVLKYV-----NRLS-----DY-----LF--AVARVI  
 N--ARLQ--VKDVE-----  
 -----YNRSAIVFRDKKEKEVE-----  
 -----

>gi|212638891|ref|YP\_002315411.1| ATP-binding cobalamin adenosyltransferase  
 [Anoxybacillus flavithermus WK1]

-----  
 -MIRMKLYTKT--GDKGQTSL---VGGRVDKNDVRV--EAYGTIDEANSMIGWAMTL---  
 -----LQDE-----KFRDIYQELQRIQ--HELFDG----GGDLAI--VG  
 EKI-----PYKVKAEEMVTFLEERI-----DA  
 YIQQAP-PLE-----RFIL-----  
 -----  
 -----P  
 G--GS--PQAAA-LHMAR-----TVTRRAERCIVALMK----QQQT----  
 -----NEVVLQYM-----NRLS-----DY-----LF--AVARVV  
 N--ARLQ--VKDVE-----  
 -----YERSAIVFRDKNEKKGES-----  
 -----

>gi|116250077|ref|YP\_765915.1| hypothetical protein RL0309 [Rhizobium leguminosarum  
 bv. viciae 3841]

-----  
 -----MP--RTLNTLTL-----SDAKQM----LQAGEAKAANLGIP-YN---  
 -----IAVVDA----GGALIA-----  
 -----FTRQDGALAGSIDLAI-----GK  
 AKTARLFDKT-----TEYL-----  
 -----  
 -----A  
 E--LA--QPGAP-LF-----GIEQSNGGNVVIFGG-----  
 -----GLPVKYD-----NQII-----GA-----VG--TSAGSV  
 EQDIAVAVAAAAEAI-----  
 -----SPNAKP-----  
 -----

>gi|114797243|ref|YP\_762132.1| putative ATP:cob(I)alamin adenosyltransferase  
 [Hyphomonas neptunium ATCC 15444]

SupplementalMultipleSequenceAlign.txt

MVRIDKIYTRT--GDKGQTRL--STGEQVPKWHPRV--AAYGTVDELNAAVGVAALE---  
-----AGSD-----ML--ARIRRIQ--NDLFDL----GADLAT--PD  
RGRVLEWT-----PLRIIATQVTRLEEEI-----DA  
MNAAIA-PLD-----SFIL-----

-----P  
G--GS--RLAAQ-LHVAR-----TLCRRAERYMAELAS--LENEPV-----  
-----NAEALAFI-----NRLS-----DW-----LF--VAGRAA  
N--NDG--ADDVK-----  
-----WVPGANR-----

>gi|110668230|ref|YP\_658041.1| atp-binding cobalamin adenosyltransferase  
[Haloquadratum walsbyi DSM 16790]

-----P  
----MKIYTKR--GDSGQTDL--RDMSRISKQHPRI--EAYGNADELNSLLGTV-RP---  
-T-----GYDD-----ID--TILHSIQ--NHLHIV----QADFAN--PD  
PDEDD-----PTVDMSHVEELEEWI-----DT  
IDEELE-PLE-----DFIL-----

-----P  
G--GA--EAGAK-LHHR-----AVCRRRAERRAVSFES--EVEDM-----  
-----NNVAVTYL-----NRLS-----DL-----LF--TLARVT  
N--QRDDVAEENPT-----  
-----Y-----

>gi|154687429|ref|YP\_001422590.1| YvqK [Bacillus amyloliquefaciens FZB42]

-----MCKSGGRR  
RNTTMKLYTKT--GDKGQTSL--IGG-RTDKDSLRLV--ESYGTIDELNSFIGLA-LA-EL  
DD-----CENC-----GDVKAELRNIQ--HELFDL----GGDLAT--V-  
TEHR-----SYTLRETSISALEDCEI-----DR  
YTAEAP-PLE-----KFIL-----

-----P  
G--GH--KAAAQ-LHIAR-----TVTRRAERLVVKLGK----TEEI-----  
-----NDTVMRYL-----NRLS-----DY-----FF--AAARAV  
N--ARQG--VQDIE-----  
-----YERSAAVFRDDE-----

>gi|77164385|ref|YP\_342910.1| cobalamin adenosyltransferase [Nitrosococcus oceani  
ATCC 19707]

-----M  
GYRLSKIYTRT--GDQGTGL--GPKQRVPKDHPRV--EAIGTIDELNALLGLL-LA--H  
-S-----IPHS-----LH--QSLTPIQ--HELFDL----GGELSI--PP  
-----TLIIQASQVQALERLL-----DN  
LNEELP-PLK-----EFIL-----

-----P  
G--GT--IPAGI-CHLAR-----TTCRRAERRLVSLAK----EESV-----  
-----NAESLKYL-----NRLS-----DL-----LF--VMAREL  
T--RTAG--AKEIL-----  
-----WEKHR-----

>gi|66769737|ref|YP\_244499.1| hypothetical protein XC\_3435 [Xanthomonas campestris  
pv. campestris str. 8004]

-----M  
GNRLSRIYTRT--GDDGSTGL--GDGSRGKDALRV--NAYGTVDEANSAIGVL-LA--A  
PN-----VPEP-----VA--ALLTTVQ--HQLFDL----GGELCI--PG  
-----HAAIDADDIAALERQL-----DH  
FNDDL-ALK-----EFIL-----

-----P  
A--GG--EAAAR-CHLAR-----TIVRRAEREAVLSR----QEPV-----  
-----RSEAIGYL-----NRLS-----DL-----LF--VLARVL

SupplementalMultipleSequenceAlign.txt

A--RADG--QQEVL-----  
 -----WRHDRRRG-----

>gi|52081804|ref|YP\_080595.1| hypothetical protein BL00723 [Bacillus licheniformis ATCC 14580]

----MKLYTKT--GDRGKTSL--IGG-RADKDHLRV--EAYGTLDEANSFIGLA-QS--Y  
 LK-----AEEA-----LFHDIL--SELTAIQ--HELFDG----GSDLAH--V-  
 NVQE-----EGKLKAESITMLEERI-----DA  
 YVEEAP-QLT-----KFIL-----

-----P  
 G--GT--EAASF-LHAAR-----TVIRRAERKIVALAK----EEDI-----  
 -----PPLALPYV-----NRLS-----DY-----LF--AAARIV  
 N--HRLG--EVDVE-----YERSADVFRTKKKS-----

>gi|21230270|ref|NP\_636187.1| hypothetical protein XCC0796 [Xanthomonas campestris pv. campestris str. ATCC 33913]

-----M  
 GNRLSRIYTRT--GDDGSTGL--GDGSRTGKDALRV--NAYGTVDEANSAIGVL-LA--A  
 PN-----VPEP-----VA--ALLTTVQ--HQLFDL----GGELCI--PG  
 -----HAAIDADDIAALERQL-----DH  
 FNDDLDP-ALK-----EFIL-----

-----P  
 A--GG--EAAAR-CHLAR-----TIVRRAERETVALSR----QEPV-----  
 -----RSEAIGYL-----NRLS-----DL-----LF--VLARVL  
 A--RADG--QQEVL-----WRHDRRRG-----

>gi|124263081|ref|YP\_001023551.1| ATP:cob(I)alamin adenosyltransferase [Methylobacterium petroleiphilum PM1]

-----M  
 GKRLTSIVTRT--GDNGTTGL--GDGSRLSKTAPRV--MAMGDVDELNSAVGML-LS-LG  
 VN-----VDED-----LKTSTLLRTVQ--QDLFDL----GGELSI--PG  
 -----YTLLKAERVVALDEWL-----RQ  
 ANARLP-RLE-----EFIL-----

-----P  
 G--GS--LAAAQ-AHVAR-----TVCRRRAERSVVALAE----QHPV-----  
 -----NATVLQFL-----NRLS-----DL-----LF--VLARLV  
 N--RVAG--GVDEQ-----WNRSR-----

>gi|222095208|ref|YP\_002529268.1| hypothetical protein BCQ\_1548 [Bacillus cereus Q1]

----MKLYTKT--GDKGTTTSV--IGGRVDKDNIRV--EAYGTIDEANSHIGYAMTK---  
 -----LQGG-----SFGDIYNELETIQ--HELFDG----GGDLAI--VG  
 EKI-----PYKVKIEMVENLESRI-----DS  
 YIEEAP-PLE-----RFIL-----

-----P  
 G--GS--ESAAA-IHIAR-----TVVRRRAERCIVSLQK----EGEI-----  
 -----NAVVLKYV-----NRLS-----DY-----LF--AVARVI  
 N--ARLQ--VKDVE-----YNRSAIVFRDKKEKEVE-----

>gi|170749366|ref|YP\_001755626.1| ATP--cobalamin adenosyltransferase [Methylobacterium radiotolerans JCM 2831]

MVCLNRIYTRT--GDKGTTAL--ADGQRRSKADLRV--ETYGTVDETACIGMARLH---  
 -----TQGP-----LD--GMLGAIQ--NDLFDL----GADLAT--PP



SupplementalMultipleSequenceAlign.txt

TPEPLPYE-----PLRIVASQVDRLERDI-----DA  
 LNAaip-PLK-----SFVL-----

-----P  
 G--GS--PAAAA-LHLAR-----TVCRRaERLAVSLAA--REGETV----  
 -----SPEALRYL-----NRLS-----DF-----LF--VASRAA  
 N--ADG--ADDVL-----  
 -----WVPGANR-----

>gi|148556013|ref|YP\_001263595.1| ATP:cob(I)alamin adenosyltransferase [Sphingomonas wittichii RW1]

MVRLTKIYTRT--GDRGETGL--VDGSRLPKSAPRM--AAIGDVDELNSAIGVA-LT---  
 -----HDLPED-----AR--AQLGRIQ--NELFDL----GADFAT--PG  
 PDYAPSEM-----SLRIVPSQVERLEAEI-----DA  
 MNADLE-SLR-----SFIL-----

-----P  
 G--GD--PGAAA-IHLAR-----AICRRaERSAVTADA----DVGL-----  
 -----NPTGLAYI-----NRLS-----DH-----LF--VLARWL  
 N--RAG--AGDIL-----  
 -----WKPGATR-----

>gi|116619267|ref|YP\_821423.1| ATP:cob(I)alamin adenosyltransferase [Solibacter usitatus Ellin6076]

-----MFFSAVLCVSAALREKESFMTHDPFNTF  
 RLAINRVYTRK--GDTGETGL--VGGQRVPKDGPRI--DAYGTVDELNSFLGIA-RA-TA  
 NQ-----LAVQEP-----RLALLAAILLRVQ--HELFNL----GSILAT--LP  
 -----EDVHPR----QPRVTAAEIAQLESEM-----DA  
 MNEDLP-PLR-----SFVL-----

-----P  
 G--GS--RLDAE-LHVGR-----TVCRRaERIVVALAR----SETV----  
 -----PPDAIRYL-----NRLS-----DS-----LF--VWSRWA  
 N--HITG--TPETL-----  
 -----WEPNQSASGRVDNG-----

>gi|21241640|ref|NP\_641222.1| hypothetical protein XAC0870 [Xanthomonas axonopodis pv. citri str. 306]

-----M  
 GNRLSRIYTRT--GDDGSTGL--GDGSRTGKDALRV--NAYGTVDEANSAIGVL-LA--A  
 PG-----VPEP-----IA--ALLTTVQ--HQLFDL----GGELCI--PG  
 -----HAAIDATDIQALETQL-----DA  
 FNQTLF-ALQ-----EFIL-----

-----P  
 A--GG--EAAAR-CHLAR-----TIVRRaERETVALSR----QEAV----  
 -----RSEAIGYL-----NRLS-----DL-----LF--VLARVL  
 A--RADG--RQEVF-----  
 -----WRHDRRRG-----

>gi|110639212|ref|YP\_679421.1| cobalamin adenosyltransferase [Cytophaga hutchinsonii ATCC 33406]

-----E  
 ---MKIYTKG--GDKGKTSL--LGGTRVPKHHIRI--EAYGTTDELNSCIPLL-IE--E  
 LP-----NDS-----QK--ALLKTVQ--YKIFEL----GASLAT--EP  
 DKQQLY-----APDLTEAHIQQLLEAI-----DA  
 MQAVLP-EQK-----YFVL-----

-----P  
 G--GH--RSVAM-AHLCR-----TVCRRaERQVLLNE----KDPV----  
 -----HPVILPFL-----NRLS-----DY-----LF--VVSRLK  
 A--QDFG--ADEVF-----

SupplementalMultipleSequenceAlign.txt

```
-----WIPEKA-----
>gi|218896507|ref|YP_002444918.1| putative ATP:cob(I)alamin adenosyltransferase
[Bacillus cereus G9842]
-----
----MKLYTKT--GDKGTTSV---IGGRVDKDDIRV--EAYGTIDEANSHIGYA-MT-KL
QG-----RTY-----RDIYNELENIQ--HELFDC----GGDLAI--V-
EQKI-----PYKVTIEMVESLERKI-----DL
YIEEAP-PLE-----RFIL-----
-----P
G--GS--ESAAA-IHIAR-----TVVRRRAERCIVSLQK----EGEI----
-----NEVVLKYV-----NRLS-----DY-----LF--AVARVI
N--ARLQ--VKDVE-----YNRSAVFRDKKEKEVE-----
-----
>gi|91774978|ref|YP_544734.1| ATP:cob(I)alamin adenosyltransferase [Methylobacillus
flagellatus KT]
-----M
GNRLSKIYTRT--GDNGTTGL--GDGSRIEKDSPRV--EAMGCVDELNAALGVL-LA--E
-T-----LPEQ-----IT--QSLTQIQ--HDLFDL----GSEISI--PG
-----YQRLQTSRVAALEQTL-----DK
LNADLE-PLK-----EFIL-----
-----P
G--GT--RAAAL-CHQAR-----TICRRAERVLLSLHR----EQVT----
-----SDAALPYL-----NRLS-----DL-----LF--VMARHL
N--HTAG--RADIL-----WQNQARILKINITID-----
-----
>gi|58583366|ref|YP_202382.1| hypothetical protein X003743 [Xanthomonas oryzae pv.
oryzae KACC10331]
-----M
GNRLSRIYTRT--GDDGSTGL--GDGSRTGKDALRV--NAYGTVDEANSAIGLL-LA--A
PG-----MPEP-----IT--VLLTTVQ--HQLFDL----GGELCI--PG
-----HAAIDAADIEALEHQL-----DA
FNDTLP-ALK-----EFIL-----
-----P
A--GG--EAAAR-CHLAR-----TIVRRAERETVALSR----LEAV----
-----RSEAIGYL-----NRLS-----DL-----LF--VLARVL
A--RADG--RQEVL-----WRHDRRRG-----
-----
>gi|30019627|ref|NP_831258.1| putative cytoplasmic protein [Bacillus cereus ATCC
14579]
-----
----MKLYTKT--GDKGTTSV---IGGRVDKDDIRV--EAYGTIDEANSHIGYA-MT-KL
QG-----GAF-----IDIYNELENIQ--HELFDC----GGDLAI--V-
EQKI-----PYKVTIVMVESLERKI-----DL
YIEEAP-PLE-----RFIL-----
-----P
G--GS--EAAAT-IHIAR-----TVVRRRAERSIVSLQK----EVKI----
-----NEVVLKYV-----NRLS-----DY-----LF--AIARVI
N--ARLQ--VKDVE-----YNRSAVFRDKKEKEVE-----
-----
>gi|15599595|ref|NP_253089.1| hypothetical protein PA4399 [Pseudomonas aeruginosa
PA01]
-----M
GNRLSKIYTRT--GDRGETGL--AGGRRVPKSHPRI--EAIGAVDELNSQLGLL-LA--
-E-----LLEARGAHPGLEEIV--QALAPVQ--HRLFDL----GGELAM--PE
```

SupplementalMultipleSequenceAlign.txt

```

-----YRALDETEVARLESCI-----DR
WNDELG-PLK-----NFIL-----
-----P
G--GS--RPVAQ-AHVCR-----SLARSAERRCQALDQ----EETL----
-----EGVGLRYL-----NRLS-----DL-----LF--VAARAI
A--RRQG--VAEIL-----
-----WEAAAKPD-----

```

>gi|220920503|ref|YP\_002495804.1| ATP/cobalamin adenosyltransferase [Methylobacterium nodulans ORS 2060]

```

-----
MVVLNRIYTRT--GDTGTTAL--ASGERRSKADLRI--ETYGTVDETNA CVGLARQH---
-----STGD-----LD--AMLSRIQ--NDLFDL----GADLAT--PE
SDTPPAYE-----PLRIVPEQVERVEREI-----DA
LNAGLQ-PLR-----SFVL-----
-----P
G--GT--AAAAA-LHLAR-----TVCRRRAERLAVALAA--TPGERV----
-----SPVAIQYL-----NRLS-----DF-----LF--VASRVA
N--DGG--AKDVL-----
-----WVPGKNRG-----

```

>gi|167645014|ref|YP\_001682677.1| ATP--cobalamin adenosyltransferase [Caulobacter sp. K31]

```

-----
MVTLNRIYTRT--GDKGLTRL--STGQPVS KASLRV--EAYGGVDETNAFIGVARQH---
-----TKGD-----AELDALLERIQ--NDLFDL----GADLAT--PE
QNEKPawe-----PLRVVDSQVERLEREI-----DQ
MNSRLS-PLT-----SFVL-----
-----P
A--GS--PASAA-LHVAR-----TVCRRRAERKVVELMS--VEGEIV----
-----GEAALKYL-----NRLS-----DL-----LF--VASRRA
N--DDG--AADVL-----
-----WKPGATR-----

```

>gi|218231992|ref|YP\_002366259.1| putative ATP:cob(I)alamin adenosyltransferase [Bacillus cereus B4264]

```

-----
----MKLYTKT--GDKGTTSV---IGGRVDKDDIRV--EAYGTIDEANSHIGYA-MT-KL
QG-----GAF-----IDIYNELENIQ--HELFD C-----GGDLAI--V-
EQKI-----PYKVTIEMVESLEKKI-----DL
YIEEAP-PL E-----RFIL-----
-----P
G--GS--EAAAT-IHIAR-----TVVRRRAERSIVSLQK----EVKI----
-----NEVVLKYV-----NRLS-----DY-----LF--AIARVI
N--ARLQ--VKDVE-----
-----YNRSALVFRDKKEKEVE-----

```

>gi|56420792|ref|YP\_148110.1| hypothetical protein GK2257 [Geobacillus kaustophilus HTA426]

```

-----
----MKLYTRT--GDQGKTSL--VGG-RVDKDHLRV--EAYGTIDEANSFIGWA-LA-LL
AG-----DERF-----RDLCAELQKI Q--HELFD C-----GGDLAI--V-
NGKL-----PYKVTEAMVTFLEERI-----DA
HVQEAP-PLQ-----KFIL-----
-----P
G--GS--KAAAA-LHMAR-----TVARRAERCIVSLQK----AEPI----
-----NDVVLKYM-----NRLS-----DY-----LF--AAARVV
N--ARLG--VKDIE-----

```

SupplementalMultipleSequenceAlign.txt

```
-----YERSAIVFRDKKEEKQ-----
-----
>gi|30261574|ref|NP_843951.1| ATP:cob(I)alamin adenosyltransferase, putative
[Bacillus anthracis str. Ames]
-----
----MKLYTKT--GDKGTTSV---IGGRVDKDDIRV--EAYGTIDEANSHIGYA-MT-KL
QG-----GAF-----IDIYNELENIQ--HELFDC----GGDLAI--V-
EQKI-----PYKVTIEMVESLERKI-----DL
YIEEAP-PLE-----RFIL-----
-----P
G--GS--EAAAT-IHIAR-----TVVRRRAERSIVSLQK----EVKI----
-----NEVVLKYV-----NRLS-----DY-----LF--AIARVI
N--ARLQ--VKDVE-----YNRSALVFRDKKEKEVE-----
-----
>gi|124268957|ref|YP_001022961.1| ATP:cob(I)alamin adenosyltransferase [Methylibium
petroleiphilum PM1]
-----M
GNRLTQIATRT--GDDGTTGL--GDGTRVAKDHLRV--QAMGDVDELNSLLGLL-LC--E
-P-----LPDA-----LR--VLLVAVQ--HELFNL----GGELSI--PG
-----YTLKDEAVAALDDAL-----AE
HNAALP-RLK-----EFIL-----
-----P
A--GT--RSASI-AHLGR-----TVARRAERAVVALAN--AEPGAV----
-----RSAPRQYL-----NRLS-----DL-----LF--VLARVL
NRANLDGLGGDDVY-----WRSRPLETPD-----
-----
>gi|16124982|ref|NP_419546.1| hypothetical protein CC_0729 [Caulobacter crescentus
CB15]
-----
MVTLNRIYTRT--GDGGTTRL--ATGAPVSKASLRV--DSYGGVDETNAAIQARQH---
-----TAAD-----PVLDAILERIQ--NDLFDL----GADLAT--PE
QH GKPEWE-----PLRVVESQVERLEREI-----DQ
LNGEMS-ALT-----SFVL-----
-----P
G--GS--PAAAA-LHVAR-----TVCRRRAERGVValse--MDGEIV----
-----GTPAIKYL-----NRLS-----DL-----LF--VAARWA
N---DKG--QADVL-----WKPGATR-----
-----
>gi|27381381|ref|NP_772910.1| hypothetical protein b1r6270 [Bradyrhizobium japonicum
USDA 110]
-----
--MDLLSYAKT--IAERIEAE--ATRARVPMAVCII--DIHGNIILKHRMSGAPTFS-LE
-----LSERKAYTSALVGLRTAELSPMVQPGQALFPLMGVAGGRFCSM-GG
GAPLHIDGQLVAGVGISGGSVQDVILEAGLREPAATDTVDMKIEVVVLPVSDVERAKR
FYADLGWRLDIDYQGPSNYRVIQFTP-----
-----P
S--SGCSVIFGSN-LTIAAPGSVKGLHLIVSDIEAACDDLRRRGITVGEFPHDPPGGIFHHA
SVQDLAAGPNPQRKSYA-----SYASFSDPDGNGW-----VFQEITARLT
G--HIED--GDES-----FTPELTDVVRRAEAAAARASAGADRA
AA-----
>gi|188580955|ref|YP_001924400.1| ATP--cobalamin adenosyltransferase
[Methylobacterium populi BJ001]
-----
MVKLNRIYTRT--GDQGTGTL--ANGERRSKADLRV--EAYGTVDETNAICIGLARLT---
-----AEPA-----LD--AMLARIQ--NDLFDL----GADLAT--PP
```

SupplementalMultipleSequenceAlign.txt

SDTPLGYE-----PLRVVAAQVQRLEAEI-----DA  
 LNaNIP-PLK-----SFVL-----

-----P  
 G--GS--ATAAA-LHLAR-----TVCRRRAERLVVALSG--VESEAI----  
 -----SAEALQYL-----NRLS-----DF-----LF--VASRAA  
 N---RDG--ADDVL-----  
 -----WVPGQNR-----

>gi|119899071|ref|YP\_934284.1| hypothetical protein azo2781 [Azoarcus sp. BH72]

-----M  
 GHRLSKIYTRT--GDAGTTGL--GDGKRVSKNSLRI--HSLGEVDEVNAIIGVL-LC--E  
 -E-----LPED-----VR--ALLTNVQ--HDLFDL----GGEVCI--PG  
 -----MSMITGKQVDHLETEL-----DR  
 LNEPLE-PLK-----DFIL-----

-----P  
 G--GT--RAAAL-AHHAR-----TVCRRRAERALVALAL----EEAV----  
 -----NDGPRQYL-----NRLS-----DL-----LF--VLGRVL  
 N--RAGG--RGDVL-----  
 -----WQKRKNA-----

>gi|49481049|ref|YP\_035695.1| hypothetical protein BT9727\_1361 [Bacillus thuringiensis serovar konkukian str. 97-27]

-----  
 ----MKLYTKT--GDRGTTSV---IGGRVDKDNIRV--EAYGTIDEANSHIGYAMTK---  
 -----LQGG-----AFGDIYNELETIQ--HELFDL----GGDLAI--VG  
 EKI-----PYKVKIEMVENLEGRI-----DS  
 YIEEAP-PLA-----RFIL-----

-----P  
 G--GS--ESAAA-IHIAR-----TVVRRRAERCIVSLQK----EGEI----  
 -----NAVVLKYV-----NRLS-----DY-----LF--AVARVI  
 N--ARLQ--VKDVE-----  
 -----YNRSAIVFRDKKEKEVE-----

>gi|52143869|ref|YP\_082959.1| hypothetical protein BCZK1360 [Bacillus cereus E33L]

-----  
 ----MKLYTKT--GDKGTTSV---IGGRVDKDNIRV--EAYGTIDEANSHIGYAMTK---  
 -----LQGG-----AFGDIYNELETIQ--HELFDL----GGDLAI--VG  
 EKI-----PYKVKIEMVENLEGRI-----DS  
 YIEEAP-PLA-----RFIL-----

-----P  
 G--GS--ESAAA-IHIAR-----TVVRRRAERCIVSLQK----EGEI----  
 -----NAVVLKYV-----NRLS-----DY-----LF--AVARVI  
 N--ARLQ--VKDVE-----  
 -----YNRSAIVFRDKKEKEVE-----

>gi|77462237|ref|YP\_351741.1| ATP:cob(I)alamin adenosyltransferase [Rhodobacter sphaeroides 2.4.1]

-----  
 MVVLSRIYTRT--GDAGETAL--GNGARVAKHSPRV--AAYGTVDET NATVGLARLH---  
 -----AQGE-----MQ--EALARIS--NDLFDL----GADLCR--PE  
 MERDHEADYT-----PLRIIAAQVNRLEREI-----DG  
 MNARLE-PLR-----SFIL-----

-----P  
 G--GS--ALAAQ-LHLCR-----TVSRRRAERELVELAT----VESV----  
 -----NPEALRYL-----NRLS-----DW-----FF--VAGRIA  
 N---DDG--RADVL-----  
 -----WVPGLTREA-----

SupplementalMultipleSequenceAlign.txt

>gi|218902688|ref|YP\_002450522.1| putative ATP:cob(I)alamin adenosyltransferase [Bacillus cereus AH820]

-----  
----MKLYTKT--GDKGTTTSV---IGGRVDKDNIRV--EAYGTIDEANSHIGYA-MT-KL  
QG-----GVF-----GDIYNELETIQ--HELFDC----GGDLAI--V-  
DEKI-----PYKVKIEMVENLEGRI-----DS  
YIEEAP-PLE-----RFIL-----  
-----

-----P  
G--GS--ESAAA-IHIAR-----TVVRRRAERCIVSLQK----EGEI----  
-----NAVVLKYV-----NRLS-----DY-----LF--AVARVI  
N--ARLQ--VKDVE-----  
-----YNRSAIVFRDKKEKEVE-----  
-----

>gi|118477034|ref|YP\_894185.1| ATP:cob(I)alamin adenosyltransferase [Bacillus thuringiensis str. A1 Hakam]

-----  
----MKLYTKT--GDKGTTTSV---IGGRVDKDNIRV--EAYGTIDEANSHIGYAMTK---  
-----LQGG-----VFGDIYNELETIQ--HELFDC----GGDLAI--VG  
EKI-----PYKVKIEMVENLEGRI-----DS  
YIEEAP-PLE-----RFIL-----  
-----

-----P  
G--GS--ESAAA-IHIAR-----TVVRRRAERCIVSLQK----EGEI----  
-----NAVVLKYV-----NRLS-----DY-----LF--AVARVI  
N--ARLQ--VKDVE-----  
-----YNRSAIVFRDKKEKEVE-----  
-----

>gi|89900271|ref|YP\_522742.1| cobalamin adenosyltransferase [Rhodoferrax ferrireducens T118]

-----M  
GQRLTQIATRT--GDNGTTGL--GDNTRVSKDSLRLV--HAMGDVDELNSNIGVL-LC--E  
-A-----MPQG-----VR--TLLVEIQ--HQLFNL----GGELSI--PG  
-----FELLKPEAVLALDAAL-----AE  
HNEALP-RLQ-----EFIL-----  
-----

-----P  
A--GT--RAASL-AHVCR-----TVARRAERAVVALEG----QESL----  
-----KDTPRQYL-----NRLS-----DL-----MF--VLARVL  
NRYRTDGSVGDDVY-----  
-----WKSEKLARASAD-----  
-----

>gi|54303335|ref|YP\_133328.1| hypothetical protein PBPRB1668 [Photobacterium profundum SS9]

-----  
-----MMISL--DLAKQLTSIAIKQ-----AEQQEFNICVSVV-----  
-----DL-----AGLLVH-----  
-----FQRMDAPLGAIDVAV-----KK  
ARTAALFQTN-----SAEL-----  
-----

-----G  
T--MA--KPGGA-IYTL-----ATNGGLISFGG-----  
-----GVMIRNEQ-----GKVI-----GA-----IG--VAGATL  
EADAEIAQFAVQQ-----  
-----

>gi|182411923|ref|YP\_001816989.1| ATP--cobalamin adenosyltransferase [Opitutus terrae PB90-1]

-----  
----MSIATRT--GDQGMTGL--LYGQRPVKDHPQI--EAVGAFDELNAAVGLA-KA---  
-----ACPD-----TDRRAALEAIQ--HDLIAL----MGEVACAESD  
LARYEASK-----FPKLGTELARIDAAV-----AA  
IEARKI-RFD-----GWAT-----  
-----

SupplementalMultipleSequenceAlign.txt

```
-----P
G--AN--TFAGA-LELAR-----TVARRAERRLVALKS---HGRTV----
-----RPVVGQYV-----NRVA-----DL-----LW--LMAREA
E--K-----
-----
```

>gi|171057630|ref|YP\_001789979.1| ATP--cobalamin adenosyltransferase [Leptothrix cholodnii SP-6]

```
-----M
AHRLTQISTR--GDDGTTGL--GDGQRVPKDHLRV--QAMGDVDELNSQLGVL-LA--E
-P-----LPAD-----VR--ELLVVIQ--HELFNL----GGELSI--PG
-----YTLKTEAVLRLDEAL-----AH
YNAQLP-RLQ-----EFIL-----
-----
```

```
-----P
A--GT--RSAAL-AHVAR-----TIARRAERAVVALAA----AEAI----
-----NEAPRHYL-----NRLS-----DL-----LF--VLARVL
NRANLDGLGGDDVY-----
-----WHSERLERAQG-----
-----
```

>gi|163859120|ref|YP\_001633418.1| hypothetical protein bpet4799 [Bordetella petrii DSM 12804]

```
-----M
GNRLSAVATRT--GDDGTTGL--GDGTRTGKDTPRI--AALGDVDELNSVIGLL-RT--E
-A-----LPDA-----VQ--ADLGVIQ--NDLFDL----GAELCI--PG
-----HAALDASQLAFLDERL-----AH
YNGGLA-PLR-----EFIL-----
-----
```

```
-----P
G--GC--RAAAL-AHLAR-----TVARRAERSVVALGR----ADQV----
-----NAPVRQYL-----NRLS-----DL-----MF--VLARHL
N--GAHG--AGDVF-----
-----WTSRHSRVQPQE-----
-----
```

>gi|113869044|ref|YP\_727533.1| cobalamin adenosyltransferase [Ralstonia eutropha H16]

```
-----M
GNRLSKIATRT--GDAGTTGL--GDGSRTGKASPRI--AAIGDVDELNCHVGVL-LT--E
-A-----LPDD-----VR--AALLHIQ--HDLFDL----GGELSI--PG
-----YTLKPEQVAQLDTWL-----AD
YNANLP-RLA-----EFIL-----
-----
```

```
-----P
G--GS--RAAAQ-AHVCR-----TVCRAERALVALGA----AEPL----
-----NEAPRQYL-----NRLS-----DL-----MF--VLARVL
N--RAGG--GSDVL-----
-----WQRDRDAPGGME-----
-----
```

>gi|56475971|ref|YP\_157560.1| hypothetical protein ebA1022 [Aromatoleum aromaticum EbN1]

```
-----M
GHRLSKIYTRT--GDAGTTGL--GDGKRVAKNSLRI--DTLGEVDELNAVVGVL-LC--E
-D-----LPDD-----VQ--ALLTDVQ--HDLFDL----GGEICI--PG
-----MSMISQKHVDKLETEL-----DR
LNEPLE-PLK-----DFIL-----
-----
```

```
-----P
G--GS--RAAAL-AHLAR-----TVCRAERAIVALGQ----EEAI----
-----NDGPRQYL-----NRFS-----DL-----LF--VLGRVL
N--RAAG--RGDVL-----
-----WQKGKNA-----
-----
```

SupplementalMultipleSequenceAlign.txt

>gi|189349460|ref|YP\_001945088.1| cob(I)alamin adenosyltransferase [Burkholderia multivorans ATCC 17616]

```
-----M
GNRLSKIATRT--GDDGTTGL--GDGRRVGKDDARI--AAIGDVDELNSNLGVL-LA--E
-T-----L PDD-----VR--TALVTIQ--HDLFDL----GGELCI--PG
-----HTVIDDTHLARLDRWL-----AD
YNATLP-PLK-----EFIL-----
```

```
-----P
A--GS--RAASL-THVCR-----TVCRRRAERSIVALGR----HEAL----
-----NDAPRRYV-----NRLS-----DL-----LF--VLARVL
N--RAAG--GADVL-----WERGRVR-----
```

>gi|161525819|ref|YP\_001580831.1| ATP--cobalamin adenosyltransferase [Burkholderia multivorans ATCC 17616]

```
MSRRPGSRRPTVRKNGSRFDAVSAHSTLERLLRPSPRAAIIAFQRNRAASRPRTGEDIRM
GNRLSKIATRT--GDDGTTGL--GDGRRVGKDDARI--AAIGDVDELNSNLGVL-LA--E
-T-----L PDD-----VR--TALVTIQ--HDLFDL----GGELCI--PG
-----HTVIDDTHLARLDRWL-----AD
YNATLP-PLK-----EFIL-----
```

```
-----P
A--GS--RAASL-THVCR-----TVCRRRAERSIVALGR----HEAL----
-----NDAPRRYV-----NRLS-----DL-----LF--VLARVL
N--RAAG--GADVL-----WERGRVR-----
```

>gi|161528366|ref|YP\_001582192.1| ATP--cobalamin adenosyltransferase [Nitrosopumilus maritimus SCM1]

```
----MKIYTKT--GDDGNTGL--QGNLRISKSHPRI--FAYGAVDEANAALGIV-LT-NS
-----LDED-----IF--DVLRKIQ--NDLFVV----GSDLSN--PN
LNDV-----KNRVSLEMIQELEQNI-----DK
FESELP-PLT-----NFIL-----
```

```
-----P
G--GS--TPTSK-LHYAR-----TVVRRRAETLTVQLAE----KDEI----
-----NSNCIIYL-----NRLS-----DL-----FF--VMGRLI
N--KRNG--TEDII-----WKI-----
```

>gi|152986291|ref|YP\_001350306.1| hypothetical protein PSPA7\_4970 [Pseudomonas aeruginosa PA7]

```
-----M
GNRLSKIYTRT--GDRGETGL--AGGRRVPKSHPRI--EAIGAVDELNSQLGLL-LA---
-E-----LLEARGAHPGLEEIV--QALAPVQ--HRLFDL----GGELAM--PE
-----YQALDETEVARLESCI-----DR
WNDELG-PLK-----NFIL-----
```

```
-----P
G--GS--RLVAL-AHVCR-----SLARRAERRCQALDQ----EETL----
-----DGVGLRYL-----NRLS-----DL-----LF--VAARAI
A--RRQG--VAEIL-----WEAAAKPD-----
```

>gi|221641192|ref|YP\_002527454.1| PduO [Rhodobacter sphaeroides KD131]

```
-----M
MVLRSRIYTRT--GDAGETAL--GNGARVAKHSPRV--AAYGSVDET NATVGLARLH---
-----AQGE-----MQ--EALARIS--NDLFDL----GADLCR--PE
MERDHEADYT-----PLRIIAAQVNRLEREI-----DG
MNARLE-PLR-----SFIL-----
```



SupplementalMultipleSequenceAlign.txt

-----P  
G--GS--ALAAQ-LHLCR-----TVSRRRAERELVELAT---VESV---  
-----NPEALRYL-----NRLS-----DW-----FF--VAGRIA  
N---DDG--RADVL-----  
-----WVPGLTREA-----  
-----

>gi|218529796|ref|YP\_002420612.1| ATP/cobalamin adenosyltransferase  
[Methylobacterium chloromethanicum CM4]

-----  
MVKLNRIYTRT--GDQGTGL--ANGERRSKADLRV--EAYGTVDETNACIGLARLT---  
-----AEPA-----LD--AMLARIQ--NDLFDL----GADLAT--PP  
SDKPLGYE-----PLRIVPTQVQRLETEI-----DA  
LNANIP-PLK-----SFVL-----  
-----

-----P  
G--GS--AAAAA-LHLAR-----TVCRRRAERLVVALSG--VESEAI---  
-----SGEALQYL-----NRLS-----DF-----LF--VASRAA  
N---RDG--ADDVL-----  
-----WVPGQNR-----  
-----

>gi|163850968|ref|YP\_001639011.1| ATP--cobalamin adenosyltransferase  
[Methylobacterium extorquens PA1]

-----MARGRDA  
VVKLNRIYTRT--GDQGTGL--ANGERRSKADLRV--EAYGTVDETNACIGLARLT---  
-----AEPA-----LD--AMLARIQ--NDLFDL----GADLAT--PP  
SDKPLGYE-----PLRIVPAQVQRLETEI-----DA  
LNANIP-PLK-----SFVL-----  
-----

-----P  
G--GS--AAAAA-LHLAR-----TVCRRRAERLVVALSG--VESEAI---  
-----SGEALQYL-----NRLS-----DF-----LF--VASRAA  
N---RDG--ADDVL-----  
-----WVPGQNR-----  
-----

>gi|32472259|ref|NP\_865253.1| hypothetical protein RB2976 [Rhodopirellula baltica SH  
1]

-----  
----MKIYTRT--GDSGTTGL--FGGPRVAKDDTRI--EAYGTVDELNATLGQV-RS--A  
-LKESAGEATAANDGLSE-----LD--ARIAQVQ--HELFSI-----GAELAS--PH  
-----PDQFD-----LRVIGPVHIQRIEDWI-----DD  
AEQQLP-PLK-----QFIL-----  
-----

-----P  
G--GS--ILASH-VHLSR-----AVCRRRAERRVISLADAVQTETPI---  
-----SDTVIIYL-----NRLS-----DW-----LF--VVSRLV  
N--QILN--VPDQI-----  
-----WEKP-----  
-----

>gi|126461099|ref|YP\_001042213.1| ATP--cobalamin adenosyltransferase [Rhodobacter  
sphaeroides ATCC 17029]

-----  
MVVLSRIYTRT--GDAGETAL--GNGARVAKHSPRV--AAYGSVDETNATVGLARLH---  
-----AQGE-----MQ--EALARIS--NDLFDL----GADLCR--PE  
MERDHEADYT-----PLRIIAAQVNRLEREI-----DG  
MNARLE-PLR-----SFIL-----  
-----

-----P  
G--GS--ALAAQ-LHLCR-----TVSRRRAERELVELAT---AESV---  
-----NPEALRYL-----NRLS-----DW-----FF--VAGRIA  
N---DDG--RADVL-----  
-----WVPGLTREA-----  
-----

>gi|103488562|ref|YP\_618123.1| cobalamin adenosyltransferase [Sphingopyxis

SupplementalMultipleSequenceAlign.txt

alaskensis RB2256]

```
-----
MVKLNKIYTRT--GDDGTTGL--VGGSRIAKSAPLM--AAIGDVDEANSWVGLAAVA---
-----LDEA-----PDAAAMLTRIQ--NELFDL-----GADLAT--PP
DAERGFQPHDM-----ALRIVPGQIARLEEEI-----DA
MNAALD-ALK-----SFIL-----
-----
```

```
-----P
G--GS--EAAAR-LHLAR-----AVTRRAERSAVAAAA-----DRAL-----
-----NPLALTYL-----NRLS-----DH-----LF--VLARSI
N-----GAAGGDVL-----
-----WKPGATR-----
-----
```

>gi|76802145|ref|YP\_327153.1| hypothetical protein NP3008A [Natronomonas pharaonis DSM 2160]

```
-----
----MKIYTGR--GDEGMTDL--RDMSRVSKTSARI--EAYGTVDEVNSLVGMV-RP---
-S-----GHDD-----VD--EKLAAVQ--NHLHII-----QADFAN--PD
ADDPD-----APHIEADHVERLESWM-----DD
FDDELD-PLE-----SFIL-----
-----
```

```
-----P
G--GS--DTGAK-LHHAR-----SVCRRRAERRAVALAS-----DEPV-----
-----NDAAVAYL-----NRLS-----DA-----LF--VWARVV
N--KRDGVREESPS-----
-----Y-----
-----
```

>gi|125717347|ref|YP\_001034480.1| ATP:cobalamin adenosyl transferase, putative [Streptococcus sanguinis SK36]

```
-----
----MRIYTKY--GDKGFTRL--YGGDRVSKTHIRV--EAYGTMDLCSHLGYV-VS--E
MR-----DYPV-----LDDLRL--LECEEIQ--QHLFDC-----GSDLAT--P-
RELRL-----PYKQEPANVSWLEERM-----DE
YMHIPP-KID-----RFII-----
-----
```

```
-----P
G--GH--RIASL-LHVAR-----TMTRRLERRMVAVIE--ADEAV-----
-----NEIGLIYI-----NRLS-----DY-----FF--VLARLV
N--DRLE--EPDTI-----
-----YKRSKIFREKK-----
-----
```

>gi|57640980|ref|YP\_183458.1| cobalamin adenosyltransferase [Thermococcus kodakarensis KOD1]

```
-----
----MSITTKT--GDKGLTGL--FTGDRVAKFSPIM--EANGTIDELDSFIGEA-KH--Y
-----VPEE-----MA--ETLERIQ--VQLYDL-----MAELAS--KG
K-----YSKVSEEDVKWLEGFI-----HK
YEEEVQ--LK-----SFVL-----
-----
```

```
-----P
G--ST--IASAK-LDVCR-----AIARRAERRVAKLVL-----DYGF-----
-----GQNALVYL-----NRLS-----DL-----LF--IMARAI
E--KREG-KLKEVK-----
-----
```

>gi|188995125|ref|YP\_001929377.1| probable cobalamin adenosyltransferase [Porphyromonas gingivalis ATCC 33277]

```
-----
----MIYTKT--GDKGTTGI--FGGERVPKDDVRV--EAYGTMDLNAAIGMIRTF---
-----LPEE-----DERQTVLYDIQ--MRMMAA-----MSIVAT--PA
GKREQN-----PNHFPEEAAAADCEAFI-----DR
LLAETT-DNG-----YFIL-----
-----
```

SupplementalMultipleSequenceAlign.txt

```
-----P  
G--GT--PLSAH-LQLAR-----TIARRAERRLWTLHR---SDEV---  
-----PDAILKWM-----NRLS-----DL-----FF--VMARHE  
M--QQQG--WSEEK-----  
-----WHRFAYKRKKK-----  
-----
```

>gi|186477260|ref|YP\_001858730.1| ATP--cobalamin adenosyltransferase [Burkholderia  
phymatum STM815]

```
-----M  
GNRLSKISTR--GDDGTTGL--GDGSRVRKDDARI--AAIGDVELNSNIGVL-LC--E  
-T-----LPND-----LR--VALTAIQ--HDLFDL---GGELCI--PG  
-----HSMIADAHLAQLDSWL-----AE  
YNATLP-PLR-----EFIL-----  
-----
```

```
-----P  
A--GT--RAASL-AHVCR-----TVCRRRAERSIVALGA---VDAI---  
-----NDAPRRYV-----NRLS-----DL-----LF--VLARVL  
N--RVDG--GDDVL-----  
-----WRHDSAQKDDAQSGE-----  
-----
```

>gi|66047317|ref|YP\_237158.1| hypothetical protein Psyr\_4090 [Pseudomonas syringae  
pv. syringae B728a]

```
-----M  
GFRLSKIYTRT--GDAGETGL--GDGRRVSKDHPRV--EAIGEVDTLNSQLGLL-LA---  
-G-----LIDEAQRVPALNEVI--EVLAPCQ--HRLFDL---GGELAM--PT  
-----YKALNEAEVERLEAAI-----DV  
WNEELG-PLE-----NFIL-----  
-----
```

```
-----P  
G--GS--SLIAQ-AHICR-----SLARSAERRCQHLNA---VEPL---  
-----EGAGLAYI-----NRLS-----DL-----LF--VAARLI  
A--RRQG--ISEIL-----  
-----WQPAPKPL-----  
-----
```

>gi|120556212|ref|YP\_960563.1| hypothetical protein Maqu\_3305 [Marinobacter  
aquaeolei VT8]

```
-----  
-----MMTI-----KRLDISDARL--LIKGAADKARD-IGVP-MC---  
-----IAVVDE-----SGNLVA-----  
-----FERMDGGKTTSVIIAQ-----DK  
AFTAAAARKA-----THDY-----  
-----
```

```
-----N  
A--AN--VPGNL-AF-----GIHTEVGGRLSTVGG-----  
-----GLPVIVD-----GEVV-----GG-----IG--LSSGTP  
RQDMDCAQAGIDYF-----  
-----LSNR-----  
-----
```

>gi|189500448|ref|YP\_001959918.1| ATP/cobalamin adenosyltransferase [Chlorobium  
phaeobacteroides BS1]

```
-----  
----MKIYTRT--GDEGTTGL--FGGSRVDKDDIRV--ECYGTFFDEVNSYIGLLRAK---  
-----LPVD-----HPWQERLQEVQ--IAFMNM----MSHLAT--PS  
DAEKPN-----SVILPIDGA AFCERWI-----DE  
LEEMAG-PSD-----CFL-----  
-----
```

```
-----P  
G--GT--EISAL-CHVVR-----TQVRRGERILVRLIK---QDNV---  
-----HPSIPVYV-----NRLS-----DL-----FF--ALARAE  
M--AGAG--VEEER-----  
-----WNSFIYKMKKST-----  
-----
```

>gi|217979910|ref|YP\_002364057.1| ATP/cobalamin adenosyltransferase [Methylocella

SupplementalMultipleSequenceAlign.txt

silvestris BL2]

```

-----
MVVLNRIYTRT--GDAGQTSL--GTGERRPKNDLRV--EYVGTIDEANCAIGLARVATSK
-----DPAC-----ARVDAMLLCVQ--NDMFDL-----GADLCV--PE
TEPIPQYE-----PLRIVQAQVDRLEKTI-----DD
LNAELP-PLM-----SFVL-----
-----

```

```

-----P
G--GS--SAAAS-LHLAR-----TITRAERLLVALAA--VPNEHV----
-----GEPALKYV-----NRLS-----DF-----LF--VAARYV
N---RKG--DGDIL-----
-----WVPGQNR-----
-----

```

>gi|146283484|ref|YP\_001173637.1| ATP:cob(I)alamin adenosyltransferase, putative [Pseudomonas stutzeri A1501]

```

-----M
GNRLSKIYTRT--GDSGETGL--GDGRRVAKDHPRV--EAMGEVDTLNSQLGLL-LA---
-E-----LADAQVQWPALNELI--SVFGPCQ--HRLFDL-----GGELAM--PD
-----YQALQESEIERLEQAI-----DR
WNQELG-PLK-----EFIL-----
-----

```

```

-----P
G--GS--RLIAL-AHLCR-----SVTRTAERRCQQLNA----SETV----
-----RPMLLAYL-----NRLS-----DA-----LF--VAARLI
A--RRQG--CGEIL-----
-----WQAAAAAAGADD-----
-----

```

>gi|187476655|ref|YP\_784678.1| ATP:cob(I)alamin adenosyltransferase [Bordetella avium 197N]

```

-----M
ANRLSVITTRT--GDDGSTGL--GDGSRVPKDDPRI--MALGDVDEFNSTLGLL-RC--E
-A-----LPDE-----VS--ADLLTIQ--HDLFDM----GAELCI--PG
-----HAALSDEQVAYLDARL-----AF
YNAALP-PLR-----EFIL-----
-----

```

```

-----P
G--GT--RAAAL-AHLAR-----TAARRAERSVIALAA----QAAV----
-----NAPLCQYL-----NRSS-----DL-----MF--VLARYL
N--QSQG--QADIY-----
-----WSSRHSRVSGA-----
-----

```

>gi|116254052|ref|YP\_769890.1| putative cobalamin adenosyltransferase [Rhizobium leguminosarum bv. viciae 3841]

```

-----P
MVKLNKIYTKT--GDDGTTGL--VSGPRRLKDDLRLV--EAYGTIDEANSAIGLARLH---
-----TADL-----PELDAMLMSIQ--NDLFDL-----GADLAT--PD
TGEPAYE-----PLRIAETQVDRVERDI-----DQ
LNAGLE-PLK-----SFIL-----
-----

```

```

-----P
G--GS--PAAAH-LHLAR-----TIARRAERLMVALAR--TDGEIV----
-----GEPAMKYV-----NRLS-----DF-----LF--VAARHA
N---DRG--HADVL-----
-----WVPGKNR-----
-----

```

>gi|104783441|ref|YP\_609939.1| Cob(I)yrinic acid a,c-diamide adenosyltransferase [Pseudomonas entomophila L48]

```

-----M
GYRLSKIYTRT--GDKGETGL--GDGRRVPKDHPRI--EAIGEVDLSLNSQLGVL-LA---
-G-----LADA-----GLTEVF--EVLAPCQ--HRLFDL-----GGELAM--PS
-----YQALNVAEVERLEAAI-----DR
WNEELG-PLK-----NFIL-----
-----

```

SupplementalMultipleSequenceAlign.txt

```
-----P
S--GS--ALVAQ-AHVCR-----SQARAAERRCQQLNA---VEPL-----
      EGVGLAYI-----NRLS-----DL-----LF--VAARII
G--RRQG--VAEVL-----
      -----WQPAGKPQA-----
-----
```

>gi|87198577|ref|YP\_495834.1| ATP:cob(I)alamin adenosyltransferase [Novosphingobium aromaticivorans DSM 12444]

```
-----P
MVKLNKIYTRT--GDDGTTGL--VDGSRRAKHDARM--QAIGDVDEANSLIGLA-AV--A
-----S-----PVA-----TA--RDLQRIQ--NDLFDL----GADLAT--PG
-ED-----FAPSEMLRVV-PSQVAVLETAI-----DA
LNEALP-PLT-----SFIL-----
-----
```

```
-----P
G--GS--EVAAR-VHVAR-----AVVRRRAERSAVALAS---VEPV-----
-----NAQALAYL-----NRLS-----DY-----LF--VLARAT
N-----AGGDPL-----
      -----WVPGASR-----
-----
```

>gi|83719852|ref|YP\_441840.1| ATP:cob(I)alamin adenosyltransferase, putative [Burkholderia thailandensis E264]

```
-----M
GNRLSKIATRT--GDDGTTGL--GDGSRVRKDDARI--AAIGDVDELNSQIGVL-LA--E
-P-----LPDD-----VR--AALSAIQ--HDLFDL----GGELCI--PG
-----HAAITDAHLARLDGWL-----AH
YNGQLP-PLE-----EFIL-----
-----
```

```
-----P
G--GA--RGAAL-AHVCR-----TVCRRRAERSIVALGA---SEPL-----
-----NAAPRRYV-----NRLS-----DL-----LF--VLARVL
N--RAAG--GADVL-----
      -----WDRTRAH-----
-----
```

>gi|46446375|ref|YP\_007740.1| hypothetical protein pc0741 [Candidatus Protochlamydia amoebophila UWE25]

```
-----P
----MKIYTRT--GDKGTTSL--FTGKRVSNDVFI--ETLGTVDEGNSSIGMA-IS---
-L-----LPKE----PFYQIQ--EQLEVIQ--HALFDV----GAALAT--PR
TSQHAKKLE-----KTRFDQEEIRLVEKWI-----DQ
METELP-PLK-----NFIL-----
-----
```

```
-----P
G--GH--SAGAA-LHLSR-----SIIRRAERLVPLYE----QADV-----
-----VEDILIYL-----NRLS-----DY-----LF--VVSFRV
N--FHLN--VPETA-----
      -----WEPHKCSSLN-----
-----
```

>gi|117927864|ref|YP\_872415.1| ATP:cob(I)alamin adenosyltransferase [Acidothermus cellulolyticus 11B]

```
-----M
AVHLTRIIYTRT--GDDGTTAL--AAGGRVAKTDPRL--SAFGSCDEANTVIGVA-LALGG
-----IPAD-----VG--ALLRDIQ--NDLFDV----GADLAT--PV
DPDPRRP-----ALRIVDADIARLEAAI-----DR
YNEELP-QLA-----SFVL-----
-----
```

```
-----P
G--GT--PAAAL-LHQAR-----AVVRRRAERETWAAIA--AYGDAV-----
-----SRLPAQYL-----NRLS-----DL-----LF--VLARYL
N--VRLG--YGDIL-----
      -----WQPAGSRRK-----
-----
```

>gi|146278589|ref|YP\_001168748.1| ATP--cobalamin adenosyltransferase [Rhodobacter

SupplementalMultipleSequenceAlign.txt

sphaeroides ATCC 17025]

```

-----
MVVLSRIYTRT--GDAGDTAL--GNGARVAKHSSRV--TAYGTVDET NATVGLARLH---
-----AEGE-----MQAALARIS--NDLFDL-----GADLCR--PE
MERDHEADYT-----PLRIIAAQVARLEREI-----DA
MNARLE-PLR-----SFIL-----
-----
-----P
G--GT--ALAAQ-LHLCR-----TVCRRRAERKVV ELAA----VESV----
-----NPEALRYL-----NRLS-----DW-----FF--VVGRIA
N---DDG--RSDVL-----
-----WVPGLTREA-----
-----

```

>gi|146343273|ref|YP\_001208321.1| putative ATP:cob(I)alamin adenosyltransferase, monofunctional PduO type [Bradyrhizobium sp. ORS278]

```

-----
MVILNRIYTRT--GDDGTTAL--GNGERRPKFDLRV--SAYGTVDET NAAIGVVRLH---
-----LADA-----PEIDAMLGLIQ--NDLFDL-----GADLAV--PQ
REGKAE-----RLRVVASQVDRLERDI-----DT
LNDKLA-PLT-----SFVL-----
-----
-----P
G--GT--PAAAH-LHVAR-----TICRRRAERIMAE LAS--RPDEPV----
-----SEAAIRYM-----NRLS-----DF-----LF--VASRAA
N---RNG--AGDVL-----
-----WVPGQNR-----
-----

```

>gi|108758160|ref|YP\_630340.1| hypothetical protein MXAN\_2113 [Myxococcus xanthus DK 1622]

```

-----
GGGVLRVANLT--QECSMVRL-----EDARPL----IAAAEKKAQELGQP-MN---
-----IAVADE----GGNLVA----
-----HVRMDGAWLGSIDISI-----KK
AFTSRAFDIT-----TQEL-----
-----
-----A
K--NA--QPGGQ-FY-----GIHASNDGRVMIFAG-----
-----GIPLKKN-----GKVV-----GA-----VG--VSEGSG
DQNHADATAGASAF-----
-----

```

>gi|42523107|ref|NP\_968487.1| cobalamin adenosyltransferase [Bdellovibrio bacteriovorus HD100]

```

-----
NAPKAKIYTRT--GDKGSTR L--VDGSCVEKFNPRV--EAYGTVDEL NSYLGVV-RS-TL
AP-----FPEM-----SELNHSLEKVQ--NELFNI----GSLLAT--EK
-----DEVFKL-----LPPITEEQIRYLELQI-----DE
LTTTLP-ELR-----NFIL-----
-----
-----P
A--GH--PTSAH-LHVAR-----TLCRRSERRSAE IAV----KDER----
-----YSMTLQYL-----NRLS-----DY-----LF--VAARWA
N--MKHG--VADV L-----
-----WKKT-----
-----

```

>gi|16080368|ref|NP\_391195.1| hypothetical protein BSU33150 [Bacillus subtilis subsp. subtilis str. 168]

```

-----
----MKLYTKT--GDKGQTGL--VGG-RTDKDSL RV--ESYGTIDEL NSFIGLA-LA-EL
SG-----QPGF-----EDLTAELLTIQ--HEL FDC----GGDLAI--V-
TERK-----DYKLTEESVSFLETRI-----DA
YTAEAP-ELK-----KFIL-----
-----

```

SupplementalMultipleSequenceAlign.txt

```
-----P
G--GS--KCASL-LHIAR-----TITRRAERRVVALMK---SEEI---
      HETVLRYL-----NRLS-----DY-----FF--AGARVV
N--ARSG--IGDVE-----YERSAIVFRDRNSSES-----
-----
```

>gi|148252709|ref|YP\_001237294.1| ATP:cob(I)alamin adenosyltransferase [Bradyrhizobium sp. BTAi1]

```
-----P
MVVLNRIYTRT--GDDGTTAL--GNGERRPKYDLRV--SAYGTVDETNAAIQVARLH---
      LGEA-----PEIDAMLGLIQ--NDLFDL---GADLAV--PQ
REGKAE-----RLRVVASQVDRLERDI-----DA
LNERLS-PLT-----SFVL-----
-----
```

```
-----P
G--GT--PAAAH-LHVAR-----TICRRAERMIAELAG--RPDEPV---
      SEAAIRYM-----NRLS-----DF-----LF--VASRAA
N---RNG--AGDVL-----WVPGQNR-----
-----
```

>gi|91975409|ref|YP\_568068.1| ATP [Rhodopseudomonas palustris BisB5]

```
-----P
MVVLNRIYTRT--GDDGSTSL--GTGERRPKYDLRI--AAYGTVDETNAALGVARAH---
      LSGN-----PEIDAMLGRIQ--NDLFDL---GADLAV--PE
REGKAE-----RLRVLSSQVERLEREI-----DQ
LNDRLA-PLT-----SFVL-----
-----
```

```
-----P
G--GK--PGAAY-LHLAR-----TICRRAERVMVELAA--QPDETI---
      TKAAVQYV-----NRLS-----DF-----LF--VASRAV
N---DAG--SGDVL-----WVPGQNR-----
-----
```

>gi|220926674|ref|YP\_002501976.1| protein of unknown function DUF336 [Methylobacterium nodulans ORS 2060]

```
-----G
---MHVTIKE--AQQAIEAA-----R-----AKA--EAIGT-----QMC-----
      IAVVDS---GGNLKA---
-----FYRMDDAWVGSIDIAQ-----KK
AKTALFFGMP-----TGQI-----
-----
```

```
-----G
A--LS--QPGGP-LY-----GIEHSNDG-LITFPG-----
      GIPIVDKD-----GVMS-----GA-----IG--VSGSTV
ENDHAVAEGARAI-----GETELPGHPWRT-----
-----
```

>gi|170744318|ref|YP\_001772973.1| hypothetical protein M446\_6273 [Methylobacterium sp. 4-46]

```
-----G
---MHVTIEE--AEKAIAAA-----R-----AKA--QAIGT-----QMC-----
      IAVVDS---GGNLKA---
-----FSRMDDAWVGSIDIAQ-----KK
ARTALFFGMP-----TGQI-----
-----
```

```
-----G
A--LS--QPGGP-LY-----GIEH-SNGGLITFPG-----
      GIPIVDKD-----GVMS-----GA-----IG--VSGSTV
EDDHAVAEGARAV-----GATELPAHPWRT-----
-----
```

>gi|86747944|ref|YP\_484440.1| cobalamin adenosyltransferase [Rhodopseudomonas palustris HaA2]

SupplementalMultipleSequenceAlign.txt

-----  
MVVLNRIYTRT--GDDGSTAL--GTGERPKFDLRF--SAYGTIDETNAALGVARLH---  
-----MAGY-----PEIDAMLARIQ--NDLFDL----GADLAV--PE  
REGKAE-----RLRVLSSQVERLEREI-----DE  
LNERLA-PLT-----SFVL-----  
-----

-----P  
G--GR--PGA AH-LHLAR-----TICRRAERIIAELAA--KPDEIV----  
-----TPAAVQYV-----NRLS-----DF-----LF--VASRAV  
N--DDG--AGDVL-----  
-----WVPGQNR-----  
-----

>gi|159185812|ref|NP\_357019.2| hypothetical protein Atu3593 [Agrobacterium tumefaciens str. C58]

-----  
MVKLNKIYTRT--GDKGTTAL--VSGPRRLKHDLRV--EAYGTVDETNSAIGIARLH---  
-----TSGL-----ETLDAMLFRIQ--NDLFDL----GADLAT--PD  
NGEPLSYE-----PLRIVESQVMRLENEI-----DE  
LNAALE-PLT-----SFVL-----  
-----

-----P  
G--GS--AAAAN-LHMAR-----TVCRRRAERLMVELSV--TDNEIV----  
-----SPAALKYA-----NRLS-----DF-----LF--VAARFT  
N--EAG--RADIL-----  
-----WVPGKNR-----  
-----

>gi|53804097|ref|YP\_114252.1| ATP:cob(I)alamin adenosyltransferase, putative [Methylococcus capsulatus str. Bath]

-----M  
GNRLTRIYTRT--GDDGTTGL--GDGCRTGKDSLRI--EACGTVDELNSVIGLV-LT--Q  
-A-----TSEE-----LR--ACLVEVQ--QTLFDL----GGELSL--PG  
-----QPSIQRRQTEWLEVWL-----NH  
FNARLP-PLE-----DFVL-----  
-----

-----P  
G--GS--LAAAH-CHVAR-----TVCRRRAERRLVALAR----GEAV----  
-----NPESLAYL-----NRLS-----DF-----LF--VVARML  
A--RMGG--HHEPI-----  
-----WHRDREPPRPRVDSAVMP-----  
-----

>gi|39937809|ref|NP\_950085.1| hypothetical protein RPA4751 [Rhodopseudomonas palustris CGA009]

-----  
MVVLNRIYTRT--GDDGTTAL--GSGERRPKSDPRI--AAYGTVDETNAALGVVRLH---  
-----LSEL-----PELDAMIGRIQ--NDLFDL----GADLAV--PE  
REGKAE-----RLRVLSSQVERLERDI-----DQ  
LNEGLA-PLT-----SFVL-----  
-----

-----P  
G--GK--PAAAY-LHVAR-----TICRRAERAMVELSA--KPNEKI----  
-----TPAAVQYV-----NRLS-----DF-----LF--VAARTV  
N--DGG--ARDVL-----  
-----WVPGQNR-----  
-----

>gi|116625945|ref|YP\_828101.1| hypothetical protein Acid\_6903 [Solibacter usitatus Ellin6076]

-----  
-----MITL-----ADAKRV----LAAAERKAEIIGQP-MN---  
-----IAVVDA----GGNLVA---  
-----HVRMDKAWIGSVDAIAI-----NK  
AWTSRAFDIS-----TKEL-----  
-----

-----A



SupplementalMultipleSequenceAlign.txt

E--LS--QSGDQ--FF-----GIHASNHRVMIFAG-----  
 -----GIPLKRG-----DQVL-----GA-----VG--VSGGMG  
 KQDQAVAEAGAEAF-----

>gi|190893626|ref|YP\_001980168.1| putative cobalamin adenosyltransferase protein  
 [Rhizobium etli CIAT 652]

MVKLNKIYTKT--GDDGTTGL--ASGPRRRKDDLRLV--EAYGTIDEANSAIGLARLY---  
 -----TTDL-----ADLDAMLMSIQ--NDLFDL----GADLAT--PD  
 TGEPPAYE-----PLRIVETQVERIERDI-----DR  
 LNADLN-PLT-----SFIL-----  
 -----P  
 G--GS--PAAAH-LHLAR-----TIARRGERLMVTLAR--MEGEIV---  
 -----GGAAMKYI-----NRLS-----DF-----LF--VAARHA  
 N--DRG--RADVL-----  
 -----WVPGKNR-----

>gi|145296554|ref|YP\_001139375.1| hypothetical protein cgr\_2463 [Corynebacterium  
 glutamicum R]

-----M  
 AVHLTKIYTRT--GDDGTTGL--SNFERVPKDDPRL--IAYADSDEANCAIGQVLAL---  
 -----GSPT-----EDMATLLRTIQ--NELFDV----GADLAT--PI  
 EENPKYP-----PLRVLPFYIERLEKEC-----DK  
 WNEDVP-ALD-----SFIL-----  
 -----P  
 G--GT--PAAAL-LHTAR-----VITRRAERAAWIAVR--EFPSTT---  
 -----STLPAQYL-----NRLS-----DL-----LF--ILSRVA  
 N-----N--GNDVK-----  
 -----WVPGGKR-----

>gi|187922728|ref|YP\_001894370.1| ATP/cobalamin adenosyltransferase [Burkholderia  
 phytofirmans PsJN]

-----M  
 GNRLSKIATRT--GDDGTTGL--GDGSRVRKDSARI--AAIGDVDELNSNLGVL-LC--E  
 -T-----LPDK-----VR--VALVAIQ--HDLFDL----GGELCI--PG  
 -----HTMITDRQLAQLDDWL-----AD  
 YNAALP-PLK-----EFIL-----  
 -----P  
 G--GS--RAASL-AHVCR-----TVCRAERAIVALGE---HETI---  
 -----NAAPRQYV-----NRLS-----DL-----LF--VLARVL  
 N--RADG--GTDVL-----  
 -----WQHERNAG-----

>gi|91786024|ref|YP\_546976.1| ATP:cob(I)alamin adenosyltransferase [Polaromonas sp.  
 JS666]

-----M  
 ANRLSQTATRT--GDNGTTGL--GDNTRVSKDSLRLV--HAMGDVDELNSQIGVL-LC--E  
 -E-----MPPG-----VR--DLLVEVQ--HQLFNL----GGELSI--PG  
 -----FELLKPEAVALLDAAL-----AE  
 HNAQLP-RLA-----EFIL-----  
 -----P  
 A--GS--RAAAL-AHVCR-----TVARRAERAVVALGA---AEPL---  
 -----KEAPRQYL-----NRLS-----DL-----LF--VLSRVL  
 N--RMNG--GDDVY-----  
 -----WKSERMARAASEE-----

>gi|34540885|ref|NP\_905364.1| ATP:cob(I)alamin adenosyltransferase, putative  
 [Porphyromonas gingivalis w83]

SupplementalMultipleSequenceAlign.txt

-----MIYTKT--GDKGTTGI--FGGERVPKDDVRV--EAYGTMDLNAAIGMI-RT---  
-----FLPEE-----DERQTVLYDIQ--MRMMAA-----MSIVAT--PA  
GKREQN-----PNHFPEEAAANCEAFI-----DR  
LLAETT-DNG-----YFIL-----

-----P  
G--GT--PLSAH-LQLAR-----TIARRVERRLWTLHR----SDEV----  
-----PDAILKWM-----NRLS-----DL-----FF--VMARHE  
M--QQQG--WSEEK-----  
-----WHRFAYKRKKK-----

>gi|19553756|ref|NP\_601758.1| hypothetical protein Ncg12471 [Corynebacterium glutamicum ATCC 13032]

-----M  
AVHLTKIYTRT--GDDGTTGL--SNFERVPKDDPRL--IAYADSDEANCAIGQVLAL---  
-----SSPT-----EDMATLLRTIQ--NELFDV----GADLAT--PI  
EENPKYP-----PLRVLPEYIERLEKEC-----DK  
WNEDVP-ALD-----SFIL-----

-----P  
G--GT--PAAAL-LHTAR-----VITRRAERAAWIAVR--EFPSTT----  
-----STLPAQYL-----NRLS-----DL-----LF--ILSRVA  
N-----N--GNDVK-----  
-----WVPGGKR-----

>gi|121998704|ref|YP\_001003491.1| ATP--cobalamin adenosyltransferase [Halorhodospira halophila SL1]

-----M  
GNRLSKIATRT--GDEGRTGL--GDGSRVDKDSHRV--EAFGEVDELNSFMGRL-LA--H  
-E-----LPED-----VA--PVLAQVQ--NELFDL----GAELAV--PG  
-----HSALPLEAVERLDGAL-----AY  
FNDSLP-HLK-----EFIL-----

-----P  
G--GG--KATAD-CHIAR-----AVCRRRAERKLVALSH--HEAV----  
-----RDESMAYL-----NRLS-----DL-----LF--VVARVL  
S--RYEN--GGEVL-----  
-----WRPAGQRAADEGA-----

>gi|90426352|ref|YP\_534722.1| ATP [Rhodopseudomonas palustris BisB18]

-----M  
MVVLNRIYTRS--GDDGTTAL--ANGERRPKYDLRI--CAYGTVDETNAAGVVRLLH---  
-----LADA-----PAVDAMLGRIQ--NDLFDL----GADLAV--PQ  
RQGSAE-----RLRVLASQVERLEREI-----DS  
LNATLA-PLA-----SFVL-----

-----P  
G--GS--PAAAH-LHVAR-----TICRRAERAMVELAA--RADETL----  
-----SPIAIQYI-----NRLS-----DF-----LF--VASRTA  
N--DNG--AGDVL-----  
-----WVPGQNR-----

>gi|114326759|ref|YP\_743916.1| cobalamin adenosyltransferase family protein [Granulibacter bethesdensis CGDNIH1]

-----M  
SIRIDRVTTTRG--GDGGMTSL--ADGSRLPKDAARI--EALGAVDELNAVLGVL-TL--H  
-----VPEA-----ER--IILHAIQ--NDLFDL----GAVLCF--PS  
PENNASP-----ARGIGEDAVARLDTWS-----TD  
WNRSPL-PLR-----SFIL-----

-----P  
G--GT--EGAAH-AHLAR-----TVARRAERRVMSLTR----TEAV----

SupplementalMultipleSequenceAlign.txt

-----DGEIIRYL-----NRLS-----DL-----LF--ILARRL  
 N-----AGADIL-----  
 -----WQPGGQSQKTG-----  
 -----

>gi|86357657|ref|YP\_469549.1| hypothetical protein RHE\_CH02038 [Rhizobium etli CFN 42]

-----MFTID-----EARRI--IAAGEARANEIGVRVN-----  
 -----IAVLDA----GAHLKA----  
 -----FTRMDGAVLGSIDLAM-----GK  
 ARTAVLFQTT-----SEAV-----  
 -----W  
 D--YC--KPGAP-AH-----GLELSNGG-LTPFAG-----  
 -----GISLFARD-----GTVI-----GA-----VG--VSGGAV  
 PQDLEIAQAAAAAA-----  
 -----A-----  
 -----

>gi|82703769|ref|YP\_413335.1| ATP protein [Nitrosospira multiformis ATCC 25196]

-----M  
 RKRLSRIYTRT--GDDGTTGL--GDGTRSSKHSQRV--EAMGMVDELNSFIGLL-LA--E  
 -A-----LDGD-----IR--IKLEDIQ--HELFDL----GGDLCI--PG  
 -----RVTINVGQANRLEAQL-----DH  
 YNEGLP-ALG-----EFIL-----  
 -----P  
 G--GT--RAASL-CHVAR-----AVCRRRAERRLVELYQ----AETL----  
 -----IPAHLQYL-----NRLS-----DF-----LF--VLCRFL  
 N--RQQG--VEDVM-----  
 -----WQPGKTAV-----  
 -----

>gi|107021812|ref|YP\_620139.1| cobalamin adenosyltransferase [Burkholderia cenocepacia AU 1054]

-----M  
 GNRLSKIATRT--GDDGTTGL--GDGRRIGKDDARI--AAIGDVDELNSNLGVL-LA--E  
 -T-----LPDD-----VR--TALVTIQ--HDLFDL----GGELCI--PG  
 -----HAVLDDTHLARLDRWL-----AD  
 YNATLP-PLK-----EFIL-----  
 -----P  
 A--GS--RAASL-AHVCRA-----TVCRRRAERSIVALGR----GDTL----  
 -----NDAPRRYV-----NRLS-----DL-----LF--VLARVL  
 N--RADG--GTDVL-----  
 -----WERGRVR-----  
 -----

>gi|162148618|ref|YP\_001603079.1| hypothetical protein GDI\_2845 [Gluconacetobacter diazotrophicus PA1 5]

-----MEVLMTC-----SL-----EDARRV----ITAAETEALMIGQP-VN--  
 -----IAVVDA----GGNLVA----  
 -----HARMDGARIGAIIDIAI-----NK  
 AFTARAFDMS-----TADL-----  
 -----A  
 E--HS--QPGGP-FF-----GIHTSNNGRVMIFAG-----  
 -----GVPLRRG-----EKIV-----GA-----IG--ISGGSG  
 EQDERVAQAGVQAL-----  
 -----

>gi|159042774|ref|YP\_001531568.1| ATP--cobalamin adenosyltransferase [Dinoroseobacter shibae DFL 12]

-----MVVLNKIYTKT--GDAGETAL--GNGARVAKHAMRV--AAYGTVDETNAVGLARQH--  
 -----

SupplementalMultipleSequenceAlign.txt

```

-----ATGE-----MD--AQLAMIQ--NDLFDL-----GADLCR--PD
MEKDAAEAYP-----PLRMADSQVARLEAEI-----DA
MNKDLE-PLR-----SFIL-----
-----P
G--GS--ALAAQ-LHLCR-----TVSRRRAERLSVELAT-----IETV-----
-----NPAAVKYL-----NRLS-----DW-----FF--VAGRVA
N--SNG--ADDVL-----WVPGANR-----

```

>gi|172059713|ref|YP\_001807365.1| ATP--cobalamin adenosyltransferase [Burkholderia ambifaria MC40-6]

```

-----M
GHRLSKIATRT--GDDGTTGL--GDGRRIGKDDTRI--AAIGDVDELNSTLGVL-LA--E
-P-----LPDD-----VR--TALVTIQ--HDLFDL-----GGELCI--PG
-----HGVLDDTHLARLDRWL-----AD
YNATLP-PLK-----EFIL-----
-----P
A--GS--RAASL-AHVCR-----TVCRRAERSIVALGR-----TDTL-----
-----NDAPRRYV-----NRLS-----DL-----LF--VLARVL
N--RADG--GSDVL-----WERGRVR-----

```

>gi|29830822|ref|NP\_825456.1| hypothetical protein SAV\_4279 [Streptomyces avermitilis MA-4680]

```

-----MSTTAV-----TPLSTEDAEV---LVSAARRAAEAAGVT-VS---
-----ITVLDA---GGHLLA---
-----FRRDDRAVLISGETST-----RK
AYTALQLNAS-----TADL-----
-----V
E--AV--QPGGL-FH-----TLPTALDRPLLFIAG-----
-----GVPVHRD-----GRLI-----GA-----LG--VGGGAP
E--QDHG-----FAAAAVKALS-----

```

>gi|121602988|ref|YP\_980317.1| ATP--cobalamin adenosyltransferase [Polaromonas naphthalenivorans CJ2]

```

-----M
ANRLSQUIATRT--GDNGTTGL--GDNTRVSKDSLRLV--HAMGDVDELNSNIGVL-LC--E
-D-----MPGG-----VR--EVLVEVQ--HQLFNL-----GGELSI--PG
-----FELLKPEAVALLDEAL-----ET
YNAQLP-RLA-----EFIL-----
-----P
A--GS--RAASL-AHVCR-----TVARRAERAVVALDK-----VETL-----
-----KEAPRLYL-----NRLS-----DL-----LF--VLSRVL
N--RMNG--GDDVY-----WKSERMVRMAREDQKDQDSQP-----

```

>gi|134294809|ref|YP\_001118544.1| ATP:cob(I)alamin adenosyltransferase [Burkholderia vietnamiensis G4]

```

-----M
GNRLSKIATRT--GDDGTTGL--GDGRRIGKDDARI--VAIGDVDELNSNLGVL-LA--E
-P-----LPDD-----VR--TALVTIQ--HDLFDL-----GGELCI--PG
-----HTVLDDTHLARLDRWL-----AD
YNATLP-PLR-----EFIL-----
-----P
A--GS--RAASL-AHVCR-----TVCRRAERSIVALGR-----ADTL-----
-----NDAPRRYV-----NRLS-----DL-----LF--VLARVL

```

SupplementalMultipleSequenceAlign.txt

N--RAGG--GSDVL-----  
-----WERGRVR-----

>gi|206561625|ref|YP\_002232390.1| cobalamin adenosyltransferase protein  
[Burkholderia cenocepacia J2315]

-----M  
GNRLSKIATRT--GDDGTTGL--GDGRRIGKDDARI--AAIGDVDELNSNLGVL-LA--E  
-T-----LPDD-----VR--AALVTIQ--HDLFDL----GGELCI--PG  
-----HAVLDDTHLARLDRWL-----AD  
YNATLP-PLK-----EFIL-----

-----P  
A--GS--RAASL-AHVCR-----TVCRRRAERSIVALGR----SDTL-----  
-----NDAPRRYV-----NRLS-----DL-----LF--VLARVL  
N--RAGG--GADVL-----  
-----WERGRVR-----

>gi|89053040|ref|YP\_508491.1| ATP:cob(I)alamin adenosyltransferase [Jannaschia sp.  
CCS1]

-----  
MVVLNKIYTRT--GDAGETAL--GDGSRVAKFSQRV--TAYGTVDELNATLGVARLH---  
-----ADGL-----MAERIAMIQ--NDLFDL----GADLCT--PN  
MEMDADREYP-----PLRMADAQVARLEAEI-----DE  
MNPNL-PLR-----SFIL-----

-----P  
G--GS--PLASH-LHICR-----TVCRRRAERLSVELGG----VESV-----  
-----NPAGVKYL-----NRLS-----DW-----FF--VAGRIA  
N--NNG--KDDIL-----  
-----WVPGANR-----

>gi|92118942|ref|YP\_578671.1| ATP--cobalamin adenosyltransferase [Nitrobacter  
hamburgensis X14]

-----  
MVVLNRIYTRT--GDDGTTAL--GTGERRPKYDLRV--GAYGTVDETNAAGVRLH---  
-----LSGA-----PDLDGMLGCIQ--NDLFDL----GADLAV--PQ  
REGKAE-----RLRMVSSQVVGLENDI-----DR  
LNAGLA-DLT-----SFVL-----

-----P  
G--GT--PAAAY-LHLAR-----TICRRRAERMMVELAA--QPGESV-----  
-----NDAAVRYM-----NRLS-----DF-----LF--VASRFM  
N--DKG--EGDVL-----  
-----WVPGQNR-----

>gi|28871531|ref|NP\_794150.1| ATP:cob(I)alamin adenosyltransferase, putative  
[Pseudomonas syringae pv. tomato str. DC3000]

-----M  
GFRLSKIYTRT--GDTGETGL--GDGRRVPKDHPRV--EAIGEVDTLNSQLGLL-LA---  
-G-----LIDEARRVPALNEVI--EVLVPCQ--HRLFDL----GGELAM--PT  
-----YKALNSAEVERLEAAI-----DV  
WNEELG-PL------NFIL-----

-----P  
G--GS--TLIAQ-AHICR-----SLARSAERRCQHLNA----VEPL-----  
-----EGAGLAYI-----NRLS-----DL-----LF--VAARLI  
A--RRQG--IAEIL-----  
-----WEPAPKPV-----

>gi|115350680|ref|YP\_772519.1| ATP--cobalamin adenosyltransferase [Burkholderia  
ambifaria AMMD]

-----M  
GHRLSKIATRT--GDDGTTGL--GDGRRIGKDDVRI--AAIGDVDELNSALGVL-LA--E

SupplementalMultipleSequenceAlign.txt

```

-P-----LPDD-----VR--TALVTIQ--HDLFDL----GGELCI--PG
-----HGVLDDTHLARLDRWL-----AD
YNATLP-PLK-----EFIL-----
-----P
A--GS--RAASL-AHVCR-----TVCRRRAERSIVALGR----TDTL----
-----NDAPRRYV-----NRLS-----DL-----LF--VLARVL
N--RADG--GSDVL-----WERGRVR-----
-----

```

>gi|209551135|ref|YP\_002283052.1| ATP/cobalamin adenosyltransferase [Rhizobium leguminosarum bv. trifolii WSM2304]

```

MVKLNKIYTKT--GDDGTTGL--VSGPRRAKDDLRLV--EAYGTIDEANSAIGLARLH---
-----TSGL-----PELDAMLMSIQ--NDLFDL----GADLAT--PD
TGEPPAYE-----PLRIVEKQVDRVEHDI-----DR
LNAGLQ-PLT-----SFVL-----
-----P
G--GS--PAAAQ-LHLAR-----TIVRRAERLMVALAR--TDGEIV----
-----SEPARKYI-----NRLS-----DF-----LF--VAARHA
N--DRG--HADVL-----WVPGKNR-----
-----

```

>gi|169236264|ref|YP\_001689464.1| hypothetical protein OE3203R [Halobacterium salinarum R1]

```

----MKIYTKR--GDDGDTDL--RTMDRVSKASPRI--EAYGTVDELNAAVGAI-RP---
-T-----DIAD-----LD--AWLREQ--NHLHVV----QADFAN--PE
PEPDD-----PQITAEHVTHVEKWI-----DH
CEARLD-PLE-----SFIL-----
-----P
G--GS--EAGAA-LHQAR-----AVCRRRAERRAVALQD-HEPDDAV----
-----NDTAVAYL-----NRLS-----DA-----LF--VFARLA
N--DVAGVHEESPS-----Y-----
-----

```

>gi|150021644|ref|YP\_001306998.1| ATP--cobalamin adenosyltransferase [Thermosiphon melanesiensis BI429]

```

----MISTKK--GDLGFTSL--ANGERVDKDNLRLV--EAYGTIDELVSNLGLIA-RA-YL
-----SGK-----IR--DIIEEIQ--KDLFRM----ATELA---KG
EKF-----VKLIDNEDVERVTKYV-----ED
FEKDLN--LN-----TFVI-----
-----P
G--MK--KESAY-MDVCR-----TIARRAERNIVRLSK----NEKI----
-----RKEILAYI-----NRVS-----DL-----FY--VIARYL
EKDEINK--IKVSE-----L-----
-----

```

>gi|110678708|ref|YP\_681715.1| cob(I)alamin adenosyltransferase, putative [Roseobacter denitrificans OCh 114]

```

MVVLNKIYTKT--GDAGETAL--GNGARVAKHAVRV--ASYGTSDELNSFVGVARLE---
-----AEGE-----MD--EALSRIQ--NDLFDL----GADLCR--PD
MDQDAEAEYP-----PLRMIEAQVERLESEI-----DA
MNKNLE-PLR-----SFIL-----
-----P
G--GS--RLAAH-LHVCR-----TVSRRRAERLCVELAT----MEAI----
-----NPSAVKYL-----NRLS-----DW-----FF--VAARTV
-----

```

SupplementalMultipleSequenceAlign.txt

N---NGG--KDDVL-----  
-----WVPGANR-----

>gi|91781869|ref|YP\_557075.1| ATP:cob(I)alamin adenosyltransferase [Burkholderia xenovorans LB400]

-----MGDMM  
GNRLSKIATRT--GDDGTTGL--GDGSRVRKDSARI--AAIGDVDELNSVGVV--LC--E  
-T-----LPAK-----VR--AALVTIQ--HDLFDL----GGELCI--PG  
-----HTMITDRQLAQLDDWL-----AD  
YNAALP-PLK-----EFIL-----

-----P  
A--GS--RAASL-AHVCR-----TVCRAERAIVALGE---HDTI-----  
-----NAAPRQYV-----NRLS-----DL-----LF--VLARVL  
N--RADG--GTDVL-----  
-----WQHERRAG-----

>gi|83644749|ref|YP\_433184.1| hypothetical protein HCH\_01926 [Hahella chejuensis KCTC 2396]

-----M  
GHRLSKIYTRT--GDKGTTGL--GNGERIAKNALRV--EAMGAVDETNSVLGVV--IC--  
-E-----LTQD-----DPLHAQLQSIQ--NDLFDL----GGELSI--PG  
-----HIIIIIDKHISRLEEWL-----DQ  
INEELP-PLK-----NFIL-----

-----P  
G--GD--RAASH-CHMAR-----SICRRAERTVVS LAQ----QEQL----  
-----NPCLQGYL-----NRLS-----DY-----LF--VAARAL  
A--RRNG--GEEIL-----  
-----WVQTKWEA-----

>gi|45657407|ref|YP\_001493.1| hypothetical protein LIC11534 [Leptospira interrogans serovar Copenhageni str. Fiocruz L1-130]

-----F  
----MKIYTKK--GDFGQTSL--ATGVKVPKSDRRV--ELYGTADLNSTIGVV--KS--  
LR-----KESI-----LH--SSLETIQ--NLLFEL----GAELAGFRPK  
Q-----ESCILEEDITFLENQI-----DQ  
MQEKLE-PLK-----KFIL-----

-----P  
G--GT--KAAAF-LHISR-----TVSRRLEREMVKFKE---EGLEI----  
-----LSSPMIFI-----NRLS-----DY-----FF--VAARFA  
N--LEEN--IQEPL-----  
-----WTSRTKT-----

>gi|38234458|ref|NP\_940225.1| hypothetical protein DIP1888 [Corynebacterium diphtheriae NCTC 13129]

-----M  
AVHLTKIYTRT--GDDGTTAL--SDFSRSKNDPRL--AAYADCDELNASIGQA-LALTT  
-----LPEE-----VV--TVLKRQV--NELFDA----GADLST--PI  
QENLKYP-----PLRIEQSYIDALEADC-----DR  
FNEQLE-ALN-----SFIL-----

-----P  
G--GT--PGAAM-LHVAR-----TIARRAERA AWA AVE--AVPETT-----  
-----SVLPARYL-----NRLS-----DL-----LF--IMSRLA  
N-----D--SNDVK-----  
-----WVPGGSRT-----

>gi|33594016|ref|NP\_881660.1| hypothetical protein BP3090 [Bordetella pertussis Tohama I]

-----M  
ANRLSVIATRT--GDDGSTGL--GDGSRVGKDTARI--AALGDVDELNSVLG LL--RA--E

SupplementalMultipleSequenceAlign.txt

```

-T-----LPAE-----MD--ADLSTIQ--HDLFDM----GAELCI--PG
-----HIALADEQVAHLDARL-----AH
YNAGLA-PLR-----EFIL-----
-----P
G--GS--RAAAL-CHLGR-----TVARRAERSVVALAR----AEVV----
-----NAPVRQYL-----NRLS-----DL-----LF--VLARHV
N--QAQG--ARDVY-----WASRHARPAD-----

```

>gi|33594892|ref|NP\_882535.1| hypothetical protein BPP0174 [Bordetella parapertussis 12822]

```

-----M
ANRLSVIATRT--GDDGSTGL--GDGSRVKGDTARI--AALGDVDELNSVLGLL-RA--E
-T-----LPAE-----MD--ADLSTIQ--HDLFDM----GAELCI--PG
-----HIALADEQVAHLDARL-----SH
YNAGLA-PLR-----EFIL-----
-----P
G--GS--RAAAL-CHLGR-----TVARRAERSVVALAR----AEVV----
-----NAPVRQYL-----NRLS-----DL-----LF--VLARHV
N--QAQG--ARDVY-----WASRHARPAD-----

```

>gi|220935810|ref|YP\_002514709.1| ATP:cob(I)alamin adenosyltransferase [Thioalkalivibrio sp. HL-EbGR7]

```

-----M
GNRLTRIYTRT--GDDGSTGL--ATGLRVPKDSARI--EVMGDVDELNSLLGVM-LA--E
-P-----VPVQ-----LS--ELLLEVQ--HDLFDL----GGELAM--PG
-----ESLMQAARVAWLETRL-----DQ
INETLP-PLK-----EFIL-----
-----P
G--GG--RAAAL-CQLAR-----AVCRRRAERHLVHLSR----DEPV----
-----TEVSRQYL-----NRLS-----DL-----LF--VMARVL
A--REVG--EGEVF-----WKSRRMKDAEK-----

```

>gi|170720142|ref|YP\_001747830.1| ATP--cobalamin adenosyltransferase [Pseudomonas putida w619]

```

-----M
GYRLSKIYTRT--GDTGETGL--GDGRRVPKDHPRI--EAIGEVDLSLNSQLGLL-LA---
-G-----LAEQ-----GLDEVS--EVLAPCQ--HRLFDL----GGELAM--PS
-----YKALNEAEVERLEAAI-----DG
WNEELG-PLT-----NFIL-----
-----P
S--GS--ALIAQ-AHVCR-----SLARSAERRCQQLNA----VEPL----
-----EGVGLAYI-----NRLS-----DL-----LF--VAARII
G--RRQG--IAEVL-----WQAAPKPAG-----

```

>gi|71735374|ref|YP\_276218.1| ATP:cob(I)alamin adenosyltransferase, putative [Pseudomonas syringae pv. phaseolicola 1448A]

```

-----M
GFRLSKIYTRT--GDAGETGL--GDGRRVSKDHPRV--EAIGEVDTLNSQLGLL-LA---
-G-----LIDEAKSVPALNEVI--EVLAPCQ--HRLFDL----GGELAM--PI
-----YKALNDAEVGRLEAAI-----DV
WNEELG-PLE-----NFIL-----
-----P
G--GS--SLIAQ-AHICR-----SLARSAERRCQHLNA----VEPL----
-----EGAGLAYI-----NRLS-----DL-----LF--VAARLI

```



SupplementalMultipleSequenceAlign.txt

A--RRQG--IAEIL-----  
-----WQPAPKPV-----

>gi|56695625|ref|YP\_165976.1| ATP:cob(I)alamin adenosyltransferase, putative  
[Ruegeria pomeroyi DSS-3]

MVVLNKIYTRT--GDKGQTAL--GNGARVAKYSDRV--ATYGTTDELNAFVGVARLE---  
-----ADGD-----MD--AALSRIQ--NDLFDL----GADLCR--PE  
MEKDAAEAYP-----PLRMIAAQVARLEQEI-----DA  
MNSDL-D-PLR-----SFIL-----

-----P  
G--GS--ALAAH-LHVCR-----TVARRAERLAVELAE---GETV---  
-----NPQAITYL-----NRLS-----DW-----FF--VAARTA  
N--NGG--KDDVL-----  
-----WIPGANR-----

>gi|78065298|ref|YP\_368067.1| ATP:cob(I)alamin adenosyltransferase [Burkholderia sp.  
383]

-----M  
GNRLSKIATRT--GDDGTTGL--GDGRRIGKDDTRI--AAIGDVDELNSNLGVL-LA--E  
-T-----LPDE-----IR--SALVTIQ--HDLFDL----GGELCI--PG  
-----HTVLDDTHLARLDRWL-----AD  
YNATLP-PLK-----EFIL-----

-----P  
A--GS--RAASL-AHVCR-----TVCRRAERSIVALGR----TETL---  
-----NDAPRRYV-----NRLS-----DL-----LF--VLARVL  
N--RTDG--GSDVL-----  
-----WERGRVR-----

>gi|24215115|ref|NP\_712596.1| hypothetical protein LA2415 [Leptospira interrogans  
serovar Lai str. 56601]

----MKIYTKK--GDFGQTSL--ATGVKVPKSDRRV--ELYGTADLNSTIGVV-KS--F  
LR-----KESI-----LH--SSLEIIQ--NLLFEL----GAELAGFRPK  
Q-----ESCILEEDITFLENQI-----DQ  
MQEKLE-PLK-----KFIL-----

-----P  
G--GT--KAAAF-LHISR-----TVSRRLEREMVKFKE---EGLEI---  
-----LSSPMIFI-----NRLS-----DY-----FF--VAARFA  
N--LEEN--IQEPL-----  
-----WTSRTKT-----

>gi|23098359|ref|NP\_691825.1| hypothetical protein OB0904 [Oceanobacillus iheyensis  
HTE831]

----MRIYTRS--GDKGLTSL--VYQQRVPKNHLRV--EAYGTCDEANSAIGLAVSVLGN  
KE-----WEGK-----QDFLDQLHRVQ--TILFHV----GAELST--PM  
DKEV-----YWKLKQSHIDEMEKQI-----DN  
WHEEL-PLN-----NFIL-----

-----P  
S--GH--LASSA-LHNR-----TIVRRAERIVVGLDE---EIE---  
-----NKLVL SYL-----NRLS-----DF-----LF--VAARYV  
N--KKG--GQEQG-----  
-----LHVDLTK-----

>gi|148549580|ref|YP\_001269682.1| ATP--cobalamin adenosyltransferase [Pseudomonas  
putida F1]

-----M  
GYRLSKIYTRT--GDKGETGL--GDGRRVPKDHPRV--EAIGEVDLSLNSQLGLL-LA---

SupplementalMultipleSequenceAlign.txt

```
-G-----LAEQ-----GLNEVT--TVLAPCQ--HRLFDL----GGELAM--PS
-----YQALNLAEVERLEAAI-----DV
WNEELG-PLK-----NFIL-----
-----P
S--GS--ALVAQ-AHVCR-----SLARSAERRCQLNA----MEPL----
-----EGVGLAYI-----NRLS-----DL-----LF--VAARII
G--RRQG--VAEVL-----WQPAEKPKG-----
```

>gi|222087342|ref|YP\_002545879.1| hypothetical protein Arad\_4189 [Agrobacterium radiobacter K84]

```
MVKLNKIYTKT--GDDGTTGL--VSGPRRLKHDLRV--ESYGTIDETNSVIGVARLH---
-----TADM-----PELDAMLRIQ--NDLFDL----GADLSA--PE
TDEPLPYE-----PLRIIDNQVSRIEHDI-----DA
LNAGLE-PLN-----SFVL-----
-----P
A--GS--PASAH-LHLAR-----TIARRAERLMVALSH--TTGERV----
-----SPAALKYV-----NRLS-----DF-----LF--VAARHA
N--DRG--RADVL-----WVPGKNR-----
```

>gi|162452129|ref|YP\_001614496.1| hypothetical protein sce3856 [Sorangium cellulosum 'So ce 56']

```
-----MSDDDTRGTGAQTPDGGESGGARVFKAP
KITINRVYTRQ--GDGGLTRL--VGGQLVPKDDARI--ETYGTVDELNALVGAA-RQ-TL
IE-----LLPGAPSEGAQRLVELGRTLRLVQ--HELFNL----GSILAT--LP
-----EDVHPK----QPRVTQAEIDLLEAEM-----DR
CQADLP-PLR-----SFVL-----
-----P
G--GS--RLNTD-LHVAR-----TVCRRRAERCCVRLAQ----AGHA----
-----DPHAVRYL-----NRLS-----DA-----LF--VWSRWA
A--ALLG--TPELL-----WEPDASASGGKAPPA-----
```

>gi|126441453|ref|YP\_001060305.1| ATP:cob(I)alamin adenosyltransferase, putative [Burkholderia pseudomallei 668]

```
-----MM
GNRLSKIATRT--GDDGTTGL--GDGSRVRKDDARI--AAIGDVDELNSQLGVL-LA--E
-P-----LPDD-----VR--AALSSIQ--HDLFDL----GGELCI--PG
-----HAAITDAHLARLDDWL-----AH
YNAQLP-PLE-----EFIL-----
-----P
G--GA--RGAAL-AHVCR-----TVCRRRAERAIVALGV----HAPL----
-----DAAPRRYV-----NRLS-----DL-----LF--VLARVL
N--RAAG--GADVL-----WDRTRAHGTR-----
```

>gi|121600479|ref|YP\_991684.1| putative ATP:cob(I)alamin adenosyltransferase [Burkholderia mallei SAVP1]

```
-----MM
GNRLSKIATRT--GDDGTTGL--GDGSRVRKDDARI--AAIGDVDELNSQLGVL-LA--E
-P-----LPDD-----VR--AALSSIQ--HDLFDL----GGELCI--PG
-----HAAITDAHLARLDDWL-----AH
YNAQLP-PLE-----EFIL-----
-----P
G--GA--RGAAL-AHVCR-----TVCRRRAERAIVALGV----HAPL----
-----DAAPRRYV-----NRLS-----DL-----LF--VLARVL
```

SupplementalMultipleSequenceAlign.txt

N--RAAG--GADVL-----  
-----WDRTRAHGTPHGTR-----

>gi|110833488|ref|YP\_692347.1| hypothetical protein ABO\_0627 [Alcanivorax borkumensis SK2]

-----MSDTN  
KTRINRVITRT--GDAGETGL--ADGSRVSKHDPRI--VVLGELDELNSALGVL--RA---  
-----RPQD-----ADLDALLGLIQ--QMLFDI----GSELAI--PG  
-----HRVIDDHDLVEMESQA-----DT  
INAELP-PLK-----EFVL-----

-----P  
G--GH--PDAAW-CHHCR-----TVARRLERHVIALRD--AEDAV-----  
-----NPVSQALI-----NRLS-----DL-----LF--VMARLI  
N--LRHE--HPETL-----  
-----WVPKADR-----

>gi|55378269|ref|YP\_136119.1| cobalamin adenosyltransferase [Haloarcula marismortui ATCC 43049]

-----  
----MTIYTGR--GDQGQTDL--RNMERVSKDSRRI--EAYGTVDEVNALVGVV-RP---  
-T-----GHDD-----ID--EKLRVVQ--NHLHIV----QADFAN--PS  
PEEGD-----PRIQESHVETLEELI-----DE  
ADSELD-PLE-----SFIL-----

-----P  
S--GS--EPGAK-LHHAR-----AVCRAAERRCVSFAA---EEAGV-----  
-----NETAIIYL-----NRLS-----DA-----LF--TLARLV  
N--KREGIREENPE-----  
-----Y-----

>gi|53713793|ref|YP\_099785.1| putative ATP:cob(I)alamin adenosyltransferase [Bacteroides fragilis YCH46]

-----  
--MMKRIYTRT--GDRGTTGI--HGGERVEKDDIRI--EANGTIDELNAVIGIIRSL---  
-----LPQE-----HDWQKLLHHLQ--RELMVV----MSHVAT--PS  
AIRDKN-----PNVLSPLGAAAFCEQEM-----DT  
MTAGLK-ENG-----YFLL-----

-----P  
G--GT--PVSAQ-LQFAR-----TVARRAERRLWTLNR----QDAV-----  
-----PEEILSFI-----NRLS-----DL-----FF--VMARFD  
M--QQQD--WPEER-----  
-----WQAFAYKTKKK-----

>gi|13473010|ref|NP\_104577.1| hypothetical protein mlr3485 [Mesorhizobium loti MAFF303099]

-----  
MVKLNKIYTRT--GDDGTTGL--GTGERRLKSDLRV--DAYGTVDEANACIGMARVH---  
-----TAAN-----HPAIDAMLSRIQ--NDLFDL----GADLAV--PD  
DGKTLDYE-----PLRIVAAQTDRVEKDI-----DL  
LNKDLQ-PLK-----SFVL-----

-----N  
G--GT--PAAAA-LHLAR-----TVARRAERLMVALAQ--DPGEHV-----  
-----NREGLKYI-----NRVS-----DF-----LF--VAARAV  
N--DNG--NADVL-----  
-----WVPGKNR-----

>gi|115526838|ref|YP\_783749.1| ATP--cobalamin adenosyltransferase [Rhodopseudomonas palustris BisA53]

-----  
MVVLNRIYTRT--GDDGTTAL--ANGERRPKCDARI--SAYGTVDETNAIIGVARLH---

SupplementalMultipleSequenceAlign.txt

-----LAQM-----PVVDAMMGRVQ--NDLFDL----GADLAV--PE  
RQGNAE-----RLRMLETQVTRLEREI-----DE  
LNAALA-PLN-----SFVL-----

-----P  
G--GT--AAASY-LHVAR-----TICRRAERAMVELAG--RPNEPL----  
-----SSFAIKYV-----NRLS-----DL-----LF--VASRAA  
N----GNGADDVL-----WVPGQNR-----

>gi|53720449|ref|YP\_109435.1| hypothetical protein BPSL2841 [Burkholderia  
pseudomallei K96243]

-----M  
GNRLSKIATRT--GDDGTTGL--GDGSRVRKDDARI--AAIGDVELNSQLGVL-LA--E  
-P-----LPDD-----VR--AALSSIQ--HDLFDL----GGELCI--PG  
-----HAAITDAHLARLDDWL-----AH  
YNAQLP-PLA-----EFIL-----

-----P  
G--GA--RGAAL-AHVCR-----TVCRAERAIVALGV----HAPL----  
-----DAAPRRYV-----NRLS-----DL-----LF--VLARVL  
N--RAAG--GADVL-----WDRTRAHGTPHGTR-----

>gi|197105595|ref|YP\_002130972.1| hypothetical protein PHZ\_c2132 [Phenylobacterium  
zucineum HLK1]

-----  
-----MTLT--IPHISISQ-----AAADRL--IEAATAKAAEMGLSMV-----  
-----IAVVDD----AGVMKA-----  
-----FRRMDGAPLLSVEIAK-----DK  
AYTAAAYKIP-----THAW-----  
-----F  
D--FI--KSDPPLLH-----GIVHTN--RLVVFGG-----  
-----GYPV-EVD-----GQVV-----GG-----IG--VSGGHY  
SQDQEVAAEALAAL-----K-----

>gi|26988083|ref|NP\_743508.1| ATP--cobalamin adenosyltransferase [Pseudomonas putida  
KT2440]

-----M  
GYRLSKIYTRT--GDKGETGL--GDGRRVPKDHPR--EAIGEVDLSLNSQLGLL-LA--  
-G-----LAEH-----GLNEVT--TVLAPCQ--HRLFDL----GGELAM--PS  
-----YQALNLAEVERLEAAI-----DV  
WNEELG-PLK-----NFIL-----

-----P  
S--GS--ALVAQ-AHVCR-----SLARSAERRCQQLNA--MEPL----  
-----EGVGLAYI-----NRLS-----DL-----LF--VAARII  
G--RRQG--IAEVL-----WQPAPKPEG-----

>gi|170750778|ref|YP\_001757038.1| hypothetical protein Mrad2831\_4389  
[Methylobacterium radiotolerans JCM 2831]

-----  
----MHVTIEQ--AE-----KATIAAARAKAVELGTQ-MC--  
-----IAVVDS----GGNLKA-----  
-----FHRMDDAWVGSIDIAH-----KK  
AKTSVFFGMM-----TGQI-----

-----G  
Q--LS--QPGGP-LY-----GIEHSNDG-LITFPG-----  
-----GIPIVDAD-----GVMS-----GA-----IG--VSGSTV

SupplementalMultipleSequenceAlign.txt

ENDHTVAEAGAKAI-----  
 -----GRTEHPAHPWRT-----  
 -----

>gi|17986376|ref|NP\_539010.1| adenosylcobalamin-dependent diol dehydratase gamma subunit [Brucella melitensis 16M]

-----MARSISRVMQADNK  
 MVKLNKIYTRT--GDKGTTGL--ASGPRRLKCDLRV--EAYGTVDEANACVGMARIHTGA  
 -----QDAH-----AEIDAMLARIQ--NDLFDL----GADLST--PD  
 DGQPLSYE-----PLRIVASQVSRVEADI-----DR  
 LNaNLQ-PLR-----SFIL-----  
 -----

-----P  
 G--GS--PASAA-LHLAR-----TVSRRRAERLMVALSR--MEGEKV----  
 -----SPEALQYI-----NRLS-----DF-----LF--VAGRAV  
 N---DNG--ASDIL-----  
 -----WVPGAQSLSERGGSVLERVSI-----  
 -----

>gi|23502823|ref|NP\_698950.1| ATP:cob(I)alamin adenosyltransferase, putative [Brucella suis 1330]

-----MARSISRVMQADNK  
 MVKLNKIYTRT--GDKGTTGL--ASGPRRLKCDLRV--EAYGTVDEANACVGMARIHTGA  
 -----QDAH-----AEIDAMLARIQ--NDLFDL----GADLST--PD  
 DGQPLSYE-----PLRIVASQVSRVEADI-----DR  
 LNaNLQ-PLR-----SFIL-----  
 -----

-----P  
 G--GS--PASAA-LHLAR-----TVSRRRAERLMVALSR--MEGEKV----  
 -----SPEALQYI-----NRLS-----DF-----LF--VAGRAV  
 N---DNG--ASDIL-----  
 -----WVPGANR-----  
 -----

>gi|27376487|ref|NP\_768016.1| hypothetical protein blr1376 [Bradyrhizobium japonicum USDA 110]

-----MARSISRVMQADNK  
 MVVLNRIYTKT--GDDGTTAL--GSGERRPKYDLRI--EAYGTVDETNAAGVVRLLH---  
 -----THDA-----PEFDAMLGRIQ--NDLFDL----GADLAV--PE  
 REGKVE-----RLRVVASQVERLEHDI-----DA  
 LNDKLA-PLT-----SFVL-----  
 -----

-----P  
 G--GT--PAAAY-LHVAR-----TICRRAERVMVELAA--QPGEVP----  
 -----GAAGIQYM-----NRLS-----DF-----LF--VASRAA  
 N---HNG--AGDVL-----  
 -----WVPGQNR-----  
 -----

>gi|21222323|ref|NP\_628102.1| hypothetical protein SC03916 [Streptomyces coelicolor A3(2)]

-----MARSISRVMQADNK  
 -----MSTTAV-----TPLTTQDAEA--LVTAHHAAEAAGVT-VS---  
 -----VTVLDA-----GGHLLA-----  
 -----FRRDDRAVLISGETST-----RK  
 AYTALQLNAP-----TADL-----  
 -----

-----V  
 D--AV--QPGGL-FH-----TLPTALDRPLLFLAG-----  
 -----GVPVHRE-----GRLI-----GA-----IG--VGGGAP  
 D--QDHG-----  
 -----FASAAVRALA-----  
 -----

>gi|120553889|ref|YP\_958240.1| ATP--cobalamin adenosyltransferase [Marinobacter aquaeolei VT8]

-----MARSISRVMQADNK  
 GNRLSKIYTRT--GDDGSTGL--ADGNRIAKNAQRV--EAMGMADELNCHIGVL-IE---  
 -----

SupplementalMultipleSequenceAlign.txt

```

-T-----LPSG-----DRLIDTFRRIQ--HHLFDL----GGEFAI--PG
-----SKVISDNHIEWLEQTL-----DE
YNTDLP-PLK-----NFIL-----
-----P
G--GC--PAAAQ-CHLAR-----AVCRRRAERVVVALGH----EDSI----
-----NTASRHYL-----NRLS-----DL-----LF--VIARVL
A--RRDG--SQEIL-----WEQKKPGL-----

```

>gi|222109288|ref|YP\_002551552.1| ATP/cobalamin adenosyltransferase [Diaphorobacter sp. TPSY]

```

-----M
GNRLTQIATRT--GDDGSTGL--GDNTRVSKASGRP--QAMGDVDELNSHIGLL-LC--E
-P-----LPAD-----MR--ELLIDVQ--HQLFNL----GGELSM--PG
-----YELLKDDALLQLDNAL-----AR
YNAELP-RLL-----EFIL-----
-----P
A--GT--RAACQ-AHVCR-----TVARRAERAVVALQQ----HETM----
-----RAAPRQYL-----NRLS-----DL-----LF--VLSRAL
N--RMDG--GSEVY-----WKSERLARQNDATE-----

```

>gi|111020544|ref|YP\_703516.1| hypothetical protein RHA1\_ro03555 [Rhodococcus jostii RHA1]

```

-----MT--VNQTSVSL-----DDAQRVIAAGQAKADEIESPSNIA-----
-----VVDA----GGNLVA----
-----HVRMDGAWIASIDISI-----SK
AFTARALDIS-----TEDL-----
-----A
A--NA--GPGGQ-FY-----GIHVSNGGRTMIFTG-----
-----GVPLRHN-----GQVV-----GA-----VG--VSGGTG
EQDKTVAEAAAAAAL-----

```

>gi|15614158|ref|NP\_242461.1| hypothetical protein BH1595 [Bacillus halodurans C-125]

```

----MRLYTRT--GDKGKTSV---IGGRLAKDDTRV--VAYGTTDELNSFVGLAITQ---
-----LDEN-----TFADIRGELFKIQ--HELFDL----GGDLAMLKVK
EDR-----PYKAKQEIVDFLEQRI-----DA
YIKEAP-ELE-----RFIL-----
-----P
G--GS--EAAAS-LHVCR-----TIARRAERYVVRLQQ----EGEI----
-----NPIVLKYL-----NRLS-----DY-----FF--AVARVV
N--SRLQ--VPDVE-----YERSAIVFREGKRKEDKK-----

```

>gi|194290650|ref|YP\_002006557.1| putative Cob(I)yrinic acid a,c-diamide adenosyltransferase [Cupriavidus taiwanensis]

```

-----M
GNRLSKIATRT--GDAGTTGL--GDGSRTGKDSLRI--AAIGDVDELNCHVGVV-LT--E
-D-----LPAD-----VR--AALLHIQ--HDLFDL----GGELSI--PG
-----YTLLKPGQVAQLDTWL-----AD
YNANLP-RLA-----EFIL-----
-----P
G--GS--RAAAQ-AHVCR-----TVCRRRAERALVALGA----AEAL----
-----NEAPRQYL-----NRLS-----DL-----MF--VLARVL

```

SupplementalMultipleSequenceAlign.txt

```

N--RAAG--GSDVL-----
-----WQRDRDAS-----
-----
>gi|163853555|ref|YP_001641598.1| hypothetical protein Mext_4158 [Methylobacterium
extorquens PA1]
-----
---MHVTIEQ--AE-----KAIQAARAKAVELGTQ-MC---
-----IAIVDS---GGNLKA---
-----FHRMDGAWVGSIDIAQ-----KK
AKTAVFFGMK-----TGQI-----
-----G
A--LS--QPGGS-LY-----GIEHSNQG-LITFPG-----
-----GIPIVDAD-----GEMS-----GA-----IG--VSGSSV
ENDDAVALAGASAI-----
-----GDTELPDHPWRT-----
-----
>gi|146305970|ref|YP_001186435.1| ATP:cob(I)alamin adenosyltransferase [Pseudomonas
mendocina ymp]
-----M
GMRLSKIYTRT--GDKGETGL--ADGRRVGKDHPRV--EAIGELDTLNSQLGLL-LA---
-D-----LEEAAATWPLQEI--EVLSPCQ--HRLFDL----GGELAM--PE
-----YQALQQGEIERLEAAI-----DR
WNEEVG-PLE-----NFIM-----
-----P
G--GS--RLIAQ-AHVCR-----SFARSAERRCQHLNA----VEPL----
-----RAEGLAYV-----NRLS-----DL-----LF--VAARLI
A--RRQG--VNEVL-----
-----WKAADKP-----
-----
>gi|114570908|ref|YP_757588.1| ATP:cob(I)alamin adenosyltransferase [Maricaulis
maris MCS10]
-----
MVRLTKIYTRT--GDAGSTRL--GDMSQTVKHDPRV--DAYGDVDEANSSIGLARAA---
-----LILN-----DPLDPPLARIQ--NDLFDL----GADLCV--PE
SDTPPDYE-----PLRVTAQVDWLETEI-----DR
LNARLE-PLN-----SFIL-----
-----P
G--GS--EAAAR-LHVCR-----TVCRRRAERKVSALMA---GGVTL----
-----NPIVLTYL-----NRLS-----DL-----LF--VMARTA
N--EEG--RADVL-----
-----WVPGKDR-----
-----
>gi|121592479|ref|YP_984375.1| ATP:cob(I)alamin adenosyltransferase [Acidovorax sp.
JS42]
-----M
GNRLTQIATRT--GDDGSTGL--GDNTRVSKASGRP--QAMGDVDELNSHIGLL-LC--E
-P-----LPAD-----MR--ELLIDVQ--HQLFNL----GGELSM--PG
-----YELLKDDALLQLDNAL-----AR
YNAELP-RLL-----EFIL-----
-----P
A--GT--RAACQ-AHVCR-----TVARRAERAVVALQQ---QETM----
-----RPAPRQYL-----NRLS-----DL-----LF--VLARVL
N--RMDG--GSEVY-----
-----WKSERLARQNHATE-----
-----
>gi|209543120|ref|YP_002275349.1| protein of unknown function DUF336
[Gluconacetobacter diazotrophicus PA1 5]
-----
-----MTCSL-----EDARRV-----IATAEAEARAIGQP-MN---

```

SupplementalMultipleSequenceAlign.txt

```

-----IAVVDA----GGHLVA-----
-----HARMDGARIGAIIDIAI-----NK
AFTARAFDMS-----TADL-----
-----A
E--HS--QPGGP--FF-----GIHTSNNGRVMIFAG-----
-----GVPLRRG-----EQIV-----GA-----IG--ISGGSG
EQDERVAQAGVLAF-----
-----

```

>gi|167035491|ref|YP\_001670722.1| ATP--cobalamin adenosyltransferase [Pseudomonas putida GB-1]

```

-----M
GYRLSKIYTRT--GDKGETGL--GDGRRVPKDHPRI--EAIGEVDLSLNSQLGLL--LA---
-G-----LDEQ-----GLDELS--AVLVPCQ--HRLFDL----GGELAM--PS
-----YQALTLAEVERLEAAI-----DV
WNEELG--PLK-----NFIL-----
-----P
S--GS--ALVAQ--AHVCR-----SLARSAERRCQQLNA----IEPL----
-----QGVGLAYI-----NRLS-----DL-----LF--VAARII
G--RRQG--VAEVL-----
-----WQPAEKPKG-----
-----

```

>gi|94969796|ref|YP\_591844.1| hypothetical protein Acid345\_2769 [Acidobacteria bacterium Ellin345]

```

-----MSAVKL-----EDARRV----IGAAEKKAKEIGQP--MN---
-----IAVADE----GGNIVA----
-----HVRMDNAWIGSIDISM-----KK
AYTSRAFDIE-----TKDL-----
-----A
T--HS--QSGGQ--FF-----GIHASNDGKIMIFAG-----
-----GIPLKRD-----GKVV-----GA-----IG--VSGGSG
DQDHAVAMAGAAAY-----
-----

```

>gi|73542471|ref|YP\_296991.1| ATP:cob(I)alamin adenosyltransferase [Ralstonia eutropha JMP134]

```

-----M
GHRLSKIATRT--GDAGTTGL--GDGSRGKDSLRI--AAIGDVDELNCQIGVL--LT--E
-T-----LPDD-----VR--AALLHMQ--HDLFDL----GGELSI--PG
-----YTLLKPEQVAQLDVWL-----EH
YNAGLP--RLA-----EFIL-----
-----P
G--GS--RAAAL--AHVCR-----TVCRAERALVALGA----MEAL----
-----NEAPRQYL-----NRLS-----DL-----MF--VLARVL
N--RLDG--GSDVL-----
-----WQRGRDTANAPEKSD-----
-----

```

>gi|15897506|ref|NP\_342111.1| hypothetical protein SS0588 [Sulfolobus solfataricus P2]

```

-----MFTRT--GDDGNTNV---ISKRVGKDSPVV--NLLGDIDELNSFIGLA--LT---
-----KIEW-----EDMQSDLMRVQ--TELFIL----GEEIIQD---
-----KGRINEETIKWLESRT-----VE
YRKESG--PVK-----LFVI-----
-----P
G--GS--EQASY--LHVVR-----SIARRVERNAVAYSK----ELNF----
-----NKWIIVYL-----NRLS-----SL-----LF--SMAIVA
-----

```



SupplementalMultipleSequenceAlign.txt

N--KRKN--VKERI-----  
 -----YDIGKYF-----

>gi|212223783|ref|YP\_002307019.1| cobalamin adenosyltransferase [Thermococcus  
 onnurineus NA1]

----MPITTKT--GDKGLTGL--FTGDRIAKYSPIM--EANGTIDELSSFLGEA-KH--Y  
 -----VPKE-----MA--EVLEKIQ--VELYSL----MAEIAS--KG  
 K-----YKKVGEGEVKWLEELI-----HK  
 YEEEVQ--LR-----AFVL-----  
 -----P  
 G--ST--IASAK-LDVCR-----TVARRAERAVARLVL----DYGF----  
 -----GSSALIYL-----NRLS-----DL-----LF--IMARAI  
 E--KREG-KIKEVK-----

>gi|152979973|ref|YP\_001352023.1| hypothetical protein mma\_0333 [Janthinobacterium  
 sp. Marseille]

-----M  
 GNRLSKIATRT--GDKGTTGL--GDGSRVDKDALRI--HAMGDVDELNSHLGLL-LC--E  
 -D-----LPAA-----LR--EELISIQ--HDLFDL----GGEICI--PG  
 -----YTLIHDEQVARLDGLL-----AK  
 YNSTLP-PLK-----EFIL-----  
 -----P  
 A--GS--RAASQ-AHICR-----TVCRRAERTIVSLGK----AEKI----  
 -----NDNPRQYM-----NRLS-----DL-----MF--VLSRVL  
 N--RYAG--GGDVL-----WEKDRVRDIAS-----

>gi|145298764|ref|YP\_001141605.1| ATP:cob(I)alamin adenosyltransferase, putative  
 [Aeromonas salmonicida subsp. salmonicida A449]

----MRIYTRQ--GDKGMTRL--ADGVQLAKDELRV--ETYGYIDELNSHIGLL-IA-EV  
 PA-----AETG-----LL--ADLVLLQ--QELFDL----GGELAFSSDG  
 QHEA-----IWQVNNEWTLRLEQQI-----DA  
 YSANLP-LLR-----NFIL-----  
 -----P  
 S--GS--RAASQ-AHVVR-----TLTRRCERLLLSLSR----AEQI----  
 -----NPAILPYV-----NRLS-----DW-----FF--TIARYL  
 L--ACTG--TPEVL-----WVCAAERG-----

>gi|70607307|ref|YP\_256177.1| hypothetical protein saci\_1571 [Sulfolobus  
 acidocaldarius DSM 639]

-----MFTRS--GDDGKTSI--VNKKVGKDSPVV--ELLDGIDELNSHIGYT-IT--  
 -----RLSW-----EDMKEDLQKIQ--VHLFEV----GEDIAS--DS  
 K-----KKKIDESYVKWIEERT-----IA  
 YRKESG-PVK-----LFVI-----  
 -----P  
 G--GS--EEASL-LHITR-----TVCRRVERNMVRYSK--ELQEL----  
 -----NKQNIYYL-----NRLS-----SL-----LF--AMALVA  
 N--KRKN--VQEKY-----YDIGKFW-----

>gi|17547382|ref|NP\_520784.1| hypothetical protein RSC2663 [Ralstonia solanacearum  
 GMI1000]

-----M  
 GNRLSKIATRT--GDDGTTGL--GDGSRGKDGRLRI--AAIGEDELNSHLGVL-LT--E

SupplementalMultipleSequenceAlign.txt

```

-P-----LPDD-----VH--AALTAIQ--HDLFDL----GGELCI--PG
-----HTMVTPAHVLRLDQWL-----AD
YNADLP-RLA-----EFIL-----
-----P
G--GS--RAAAQ-AHVCR-----TVCRAERAIVALGR----AETL----
-----GEAPRQYV-----NRLS-----DL-----LF--VLARVL
N--RAGG--GQDVL-----WEHERHKPV-----

```

>gi|182677150|ref|YP\_001831296.1| ATP--cobalamin adenosyltransferase [Beijerinckia indica subsp. indica ATCC 9039]

```

MVVLTRIIYTRG--GDGGTTSL--GTGERRKKQDLRI--ETYGTVDEANACIGLARIHTAS
-----EAAH-----AKLDAMLLCIQ--NDLFDL----GADLCM--PE
NTAANPKVE-----ALRILPAQVERLERDI-----DT
INAGLE-PLS-----SFVL-----
-----P
G--GT--PAAAA-LHLAR-----TVARRAERLLCALRE--TPGESV----
-----GAPTLAYL-----NRLS-----DF-----LF--VAARHV
N--QQG--AGDVL-----WVPGNLR-----

```

>gi|158421682|ref|YP\_001522974.1| cobalamin adenosyltransferase [Azorhizobium caulinodans ORS 571]

```

MVKLNKIYTRT--GDDGSTGL--GTGERVRKDDLRLV--AAYGTVDET NATIGLVRLH---
-----LAAY-----PQVDAILARVQ--NDLFDL----GADLCV--PE
RPGAPPPPYE-----PLRITAPQVRRLEEDI-----DR
LNAELD-PLK-----SFIL-----
-----P
G--GT--PAAAH-LHLAR-----TVARRAERDMVTLAE--SDGEQV----
-----GMEALRYI-----NRLS-----DL-----LF--VAGRYV
N-----GHGANDVL-----WVPGAHR-----

```

>gi|188583856|ref|YP\_001927301.1| protein of unknown function DUF336 [Methylobacterium populi BJ001]

```

----MHVTIEQ--AE-----KAIEAARAKAVELGTQ-MC---
-----IAVVDS-----GGNLKA---
-----FHRMDGAWVGSIDIAQ-----KK
AKTSVFFGMK-----TGQI-----
-----G
S--LS--QPGGS-LY-----GIEHSNQG-LITFPG-----
-----GIPIVDAD-----GEMS-----GA-----IG--VSGSSV
ENDDAVALAGASAI-----GDTELPDHPWRT-----

```

>gi|134093562|ref|YP\_001098637.1| putative Cob(I)yrinic acid a,c-diamide adenosyltransferase [Herminiimonas arsenicoxydans]

```

-----M
GNRLSKIATRT--GDNGTTGL--GDGSRIDKDALRV--HAMGDVDELNSHIGLL-LC--E
-D-----LPPA-----LR--EELISIQ--HDLFDM----GGELCI--PG
-----YTMIHDAQVTRLDALL-----AK
YNADLP-ALK-----EFIL-----
-----P
A--GS--RAASQ-SHVCR-----TVCRAERTIVSLGK----AEKM----
-----NDNPRQYM-----NRLS-----DL-----LF--VLSRVL

```

SupplementalMultipleSequenceAlign.txt

```

N--RHAG--DGDVL-----
-----WEKDRVRDIES-----
-----
>gi|72163425|ref|YP_291082.1| hypothetical protein Tfu_3026 [Thermobifida fusca YX]
-----
-----MSVTL-----AEARRV-----IEAGEAKAAEIGQP-MN---
-----IAVVDA-----GGNLVA-----
-----HVRMDGAWIGSIDISI-----NK
AYTSRAFDIS-----TKEL-----
-----A
E--HS--QSGGQ-FF-----GIHASNGGRVMIFAG-----
-----GVPLRRN-----GTVV-----GA-----VG--VSGGTG
EQDQAVAEAAAAAF-----
-----
>gi|15921748|ref|NP_377417.1| hypothetical protein ST1454 [Sulfolobus tokodaii str.
7]
-----
-----MFTKS--GDDGNTV--INK-RVGKDSPLV--NFLGDLDELNSFIGFA-IS-KI
-----PWED-----MK--KDLERVQ--VELFEI-----GEDLST--QS
S-----KKKIDEKYVKWLEERT-----VE
YRKESG-PVK-----LFVI-----
-----P
G--GS--EEASV-LHVTR-----SVARRVERNAVKYTK---ELPEI----
-----NRMIIIVYL-----NRLS-----SL-----LF--AMALVA
N--KRRN--VSEKI-----
-----YDIGKFW-----
-----
>gi|217977938|ref|YP_002362085.1| protein of unknown function DUF336 [Methylocella
silvestris BL2]
-----
-----MHV-----TIAHAEEAAI--EA-ARKKAVETKTQMC-----
-----IAVVDS-----GANLKA-----
-----FYRMDDAWVGSIDISI-----KK
AKTALYFGMP-----TGAI-----
-----G
Q--LS--QPGGS-LF-----GIEHSNDG-LITFPG-----
-----GLPIVDEE-----GVLV-----GA-----IG--VSGSSV
ENDNIVAQAGVAVL-----
-----GVSELPDHPWRT-----
-----
>gi|187735414|ref|YP_001877526.1| ATP/cobalamin adenosyltransferase [Akkermansia
muciniphila ATCC BAA-835]
-----
----MSVITKR--GDSGETDL--MFGRRSPKTAPRI--EAYGTVDELNSLIGVV-RH---
-----SGVS-----SRTVEMLDGVQ--ARLVGA-----MGELATMEED
LPKYDAKG-----YARIKAEDVAWLEEQA-----HL
LEKECDIRFK-----GWAR-----
-----P
GKEGS--LGSAY-LDLAR-----SVCRAERRVVALRL---DHALS-----
-----NVNTALFL-----NRLS-----DL-----CW--VLARFE
A--LAAG--EKIQA-----
-----
>gi|153008342|ref|YP_001369557.1| ATP--cobalamin adenosyltransferase [Ochrobactrum
anthropi ATCC 49188]
-----
MVKLNKIYTRT--GDKGTTGL--ASGPRRLKSDLRV--EAYGTVDETACIGMARLH---
-----TGGE-----DNPHAQIDAMLGRIQ--NDLFDL-----GADLST--PD

```

SupplementalMultipleSequenceAlign.txt

DGKPLAYE-----PLRIVASQVSRVEADI-----DL  
LNTDLQ-PLR-----SFIL-----

-----P  
G--GS--AASAA-LHLAR-----TVSRRRAERLMVALAR--VEGEVV----  
-----SAEALQYI-----NRLS-----DF-----LF--VASRTV  
N---DNG--AQDVL-----  
-----WVPGANR-----

>gi|94311855|ref|YP\_585065.1| ATP:cob(I)alamin adenosyltransferase [Ralstonia metallidurans CH34]

-----M  
GNRLSKIATRT--GDAGTTGL--GDGSRVGKNSLRI--VAIGDVDELNSHIGLL-LT--E  
PD-----LPED-----VR--AALLHIQ--HDLFDL----GGELSI--PG  
-----YTLLKAPQVAQLDDWL-----AH  
YNAALP-RLA-----EFIL-----

-----P  
G--GS--RPAAQ-AHICR-----TVCRRRAERALVELGA----AEAL-----  
-----NEAPRQYL-----NRLS-----DL-----LF--VLARVL  
N--RAGG--GSDVL-----  
-----WQRERES-----

>gi|150397728|ref|YP\_001328195.1| ATP--cobalamin adenosyltransferase [Sinorhizobium medicae WSM419]

-----M  
MVKLNKIYTRT--GDNGTTGL--VSGPRRLKSDLRV--EAYGAIDEANAFVGLARQH---  
-----THAM-----PDLDATLMRVQ--NDLFDL----GADLAT--PD  
TGEKPEYE-----PLRIVAAQVARLEEEI-----DR  
LNADLE-PLR-----SFVL-----

-----P  
A--GS--AASAA-LHVAR-----TVARRAERQMVALSR--VEGEVV----  
-----SAEAVAYV-----NRLS-----DF-----LF--VAARWT  
N---DKG--HADVL-----  
-----WVPGKNR-----

>gi|54023035|ref|YP\_117277.1| hypothetical protein nfa10680 [Nocardia farcinica IFM 10152]

-----M  
SVHLTRIIYTRT--GDDGTTGL--SDFSRVPKTDPRLL--VAYADCDENAAIGVALAL---  
-----GDPD-----ERVRPVLRRVQV--NDLFDL----GADLST--PV  
VAEPKHP-----PLRITQDYIDRLEKWC-----DE  
FNAELA-PLN-----SFIL-----

-----P  
G--GT--PLAAL-LHTAR-----TVARRAERSAWA AVR--SYPDDT-----  
-----SVLPARYL-----NRLS-----DL-----LF--ILSRYT  
N-----PDGDVL-----  
-----WRPFGAESAR-----

>gi|196157240|ref|YP\_002126729.1| putative vitamin B12 related Cobalamin adenosyltransferase [Alteromonas macleodii 'Deep ecotype']

-----M  
----MKIYTRT--GDKGSTQIYADKAVRVKDDLVV--QSYGDMDELNSHIGLLAAH---  
-----VPAT-----HN--SLLHDIQ--RSLFQA----GFAISA-----  
-----SSTLTPNDVEKLESAI-----DS  
LTSQMP-PNT-----SFVL-----

-----P  
G--GS--KAAAQ-AHVC R-----AVCRRRAERSVISLSK----HYDV----  
-----PEVVHAYL-----NRLS-----DF-----LF--TFARFL  
N--IEAG--VDEVP-----

SupplementalMultipleSequenceAlign.txt

```

-----V-----
>gi|209963670|ref|YP_002296585.1| ATP:cob(1)alamin adenosyltransferase, putative
[Rhodospirillum centenum SW]
-----
-MSKTKVVTRT--GDGGETSL--GRGVRVPKCSDRV--EAYGSVDEVGAMIGVL-RS--M
LE-----DNAA-----VD--ARLRAIQ--IDLYNI-----CADLHM--PG
EAGA-----ALRIDGSGLERIEAEL-----GE
MNEGLP-RLA-----NFVL-----
-----A
G--GT--RAAAF-AHLTR-----TVTRRAERRVVALAR----AEEV----
-----NPEVLRYM-----NRLS-----DY-----LF--ILARTL
N---ENG--AKDDL-----WAPRGVR-----
-----
>gi|193215910|ref|YP_001997109.1| ATP/cobalamin adenosyltransferase [Chloroherpeton
thalassium ATCC 35110]
-----
----MKIYTRK--GDTGETGL--FGGKRVPKDDVRV--ECYGTFFDEVNATVGLL-RA---
-----KLPID-----HVWQANLHRIQ--KDMMNV----MSHLAR--PS
DTAKEN-----PNPLPLDGAAAFCEQWI-----DE
LEATVAAPSD-----YFLL-----
-----P
G--GN--EISAL-CQVIR-----TQFRRGERRLVTLMR----TDEV----
-----HPSIPEYV-----NRLS-----DL-----FF--VLARAE
M--ATAG--MEEER-----WNLFIYKRKKKA-----
-----
>gi|111018470|ref|YP_701442.1| cobalamin adenosyltransferase [Rhodococcus jostii
RHA1]
-----M
AVHLTKIYTRT--GDDGTTGL--SDFSRVSKNDPRL--IAYADCDEANASIGVAVAL---
-----GDPP-----EEIRSILRQIQ--NDLFDA----GADLST--PV
EEEEPKYP-----PLRISDEYIDRLEGWC-----DE
LNERLE-PLN-----SFIL-----
-----P
G--GT--ALGAL-LHVAR-----TVTRRAERSAWAAVD--ANPETT----
-----NALPAKYL-----NRLS-----DL-----LF--IVSRLA
N-----PEGDVL-----WKPGAGKS-----
-----
>gi|99082268|ref|YP_614422.1| ATP:cob(I)alamin adenosyltransferase [Silicibacter sp.
TM1040]
-----
MVVLNKIYTRT--GDKGDTAL--GNGARVAKHSARV--TAYGTTDELNAQVGVARLA---
-----AEAE-----MD--AALARIQ--NDLFDL----GADLCR--PD
MHLDETAEYP-----PLRIAQSQVDRLEAEI-----DA
MNKDLS-PLR-----SFVL-----
-----P
G--GS--ALSAH-LHVCR-----TVARRAERLTTELAG----AEDV----
-----NAAALIYL-----NRLS-----DW-----FF--VASRVA
N---EHG--AKDVL-----WVPGANR-----
-----
>gi|222149949|ref|YP_002550906.1| hypothetical protein Avi_4008 [Agrobacterium vitis
S4]
-----
MVKLNKIYTRT--GDDGTTAL--VCGPRRFKHDLRV--DAYGTIDEANSAIGVARLY---
-----TAGD-----EVLDAMLFRIQ--NDLFDL----GADLAT--PD

```

SupplementalMultipleSequenceAlign.txt

```
TGEKLEWE-----PLRVVQSQVDRIEQEI-----DA
LNAHLE-PLK-----SFVL-----
-----P
A--GS--PASAN-LHLAR-----TIARRGERIIVDLMQ--IPGEAV----
-----SAPALKYV-----NRLS-----DF-----LF--VAARYA
N---EIG--KADVL-----
-----WVPGKNR-----
=====
```

%% PduP [targeting tail implicated]

>gi++|16765381|ref|NP\_460996.1| CoA-dependent propionaldehyde dehydrogenase  
[Salmonella typhimurium LT2]

```
-----MNTSELETLIRTI-----SEQLTTPAQTPVQPQGGK
-----GIFQSVS
EAIDAAHQAFLRYQ-QCPLKTRSAAIISAMRQEL--TPLLAPLAESANETGMGNKEDKFL
KNKAALDNTPGV--EDLTTTALTGDGGMVLF EYS-PFGVIGSVAPSTNPTETIINNSISM
LAAGNSIYFSPHPGAKKVS LKLISLIEEIAFRCCGIRNLVVTVAEPTFEATQQMMHPRI
AVLAITGGPGIVAMGMK-SGKKVIGAGAGNPPCIVDETADLVKAAEDIINGASFDYNLPC
IAEKSLIVVESVAERLVQQM-QTFGALLL-SPADTDKLRVAVCL-----PEGQA-----
NKKLVGKSPSAMLEAAGIA--VPAKAPRLLIAL-VN--ADDPWVTSEQLMPMLPVVKVSD
FDSALALALKVEE--GLHHTAIMHSQNV---SRLNLAARTLQTSIFVKNGPSYAG-IGVG
GE----GFTTFTIATPTGEGTT----SARTFARSRCV-----
```

-----LTNGFSIR-----

>gi++|198246036|ref|YP\_002216136.1| ethanolamine utilization protein EutE  
[Salmonella enterica subsp. enterica serovar Dublin str. CT\_02021853]

```
-----MNTSELETLIRTI-----SEQLTTPAQTPAQPPQGGK
-----GIFQSVS
EAIDAAHQAFLRYQ-QCPLKTRSAAIISAMRQEL--TPLLATLAEESANETGMGNKEDKFL
KNKAALDNTPGV--EDLTTTALTGDGGMVLF EYS-PFGVIGSVAPSTNPTETIINNSISM
LAAGNSVYFSPHPGAKKVS LKLISLIEEIAFRCCGIRNLVVTVAEPTFEATQQMMHPRI
AVLAITGGPGIVAMGMK-SGKKVIGAGAGNPPCIVDETADLVKAAEDIINGASFDYNLPC
IAEKSLIVVESVAERLVQQM-QTFGALLL-SPADTDKLRVAVCL-----PEGQA-----
NKKLVGKSPSAMLEAAGIA--VPAKAPRLLIAL-VN--ADDPWVTSEQLMPMLPVVKVSD
FDSALALALKVEE--GLHHTAIMHSQNV---SRLNLAARTLQTSIFVKNGPSYAG-IGVG
GE----GFTTFTIATPTGEGTT----SARTFARSRCV-----
```

-----LTNGFSIR-----

>gi++|197250063|ref|YP\_002147008.1| ethanolamine utilization protein EutE  
[Salmonella enterica subsp. enterica serovar Agona str. SL483]

```
-----MNTSELETLIRTI-----SEQLTTPAQTPAQPPQGGK
-----GIFQSVS
EAIDAAHQAFLRYQ-QCPLKTRSAAIISAMRQEL--TPLLATLAEESANETGMGNKEDKFL
KNKAALDNTPGV--EDLTTTALTGDGGMVLF EYS-PFGVIGSVAPSTNPTETIINNSISM
LAAGNSIYFSPHPGAKKVS LKLISLIEEIAFRCCGIRNLVVTVAEPTFEATQQMMHPRI
AVLAITGGPGIVAMGMK-SGKKVIGAGAGNPPCIVDETADLVKAAEDIINGASFDYNLPC
IAEKSLIVVESVAERLVQQM-QTFGALLL-SPADTDKLRVAVCL-----PEGQA-----
NKKLVGKSPSAMLEAAGIA--VPAKAPRLLIAV-VN--ADDPWVTSEQLMPMLPVVKVSD
```

SupplementalMultipleSequenceAlign.txt

FDSALALALKVEE--GLHHTAIMHSQNV---SRLNLAARTLQTSIFVKNGPSYAG-IGVG  
GE----GFTTFTIATPTGEGTT-----SARTFARSRCV-----

-----LTNGFSIR-----

>gi++|205353194|ref|YP\_002226995.1| putative CoA-dependent proprionaldehyde  
dehydrogenase [Salmonella enterica subsp. enterica serovar Gallinarum str. 287/91]

-----MNTSELETLIRITL-----SEQLTTPAQTPVQPQGK  
-----GIFQSVS  
EAIDAAHQAFLRYQ-QCPLKTRSAIISAMRQEL--TPLLATLAEESANETGMGNKEDKFL  
KNKAALDNTPGV--EDLTTTALTGDGGMVLFEYS-PFGVIGSVAPSTNPTETIINNSISM  
LAAGNSVYFSPHPGAKKVSLLKISLIEEIAFRCCGIRNLVVTVAEPTFEATQQMMHPRI  
AVLAITGGPGIVAMGMK-SGKKVIGAGAGNPPCIVDETADLVKAAEDIINGASFDYNLPC  
IAEKSLIVVESVAERLVQQM-QTFGALLL-SPTDCLKLRAVCL-----PEGQA-----  
NKKLVGKSPSAMLEAAGIA--VPAKAPRLLIIV-VN--ADDPWVTSEQLMPMLPVVKVSD  
FDSALALALKVEE--GLHHTAIMHSQNV---SRLNLAARTLQTSIFVKNGPSYAG-IGVG  
GE----GFTTFTIATPTGEGTT-----SARTFARSRCV-----

-----LTNGFSIR-----

>gi++|197361971|ref|YP\_002141608.1| putative CoA-dependent proprionaldehyde  
dehydrogenase [Salmonella enterica subsp. enterica serovar Paratyphi A str.  
AKU\_12601]

-----MNTSELETLIRITL-----SEQLTTPAQTPAQPPQGK  
-----GIFQSVS  
EAIDAAHQAFLRYQ-QCPLKTRSAIISAMRQEL--TPLLATLAEESANETGMGNKEDKFL  
KNKAALDNTPGV--EDLTTTALTGDGGMVLFEYS-PFGVIGSVAPSTNPTETIINNSISM  
LAAGNSIYFSPHPGAKKVSLLKISLIEEIAFRCCGIRNLVVTVAEPTFEATQQMMHPRI  
AVLAITGGPGIVAMGMK-SGKKVIGAGAGNPPCIVDETADLVKAAEDIINGASFDYNLPC  
IAEKSLIVVESVAERLVQQM-QTFGALLL-SPADTDKLRVAVCL-----PEGQA-----  
NKKLVGKSPSAMLEAAGIA--VPAKAPRLLIAM-VN--ADDPWVTSEQLMPMLPVVKVND  
FDSALALALKVEE--GLHHTAIMHSQNV---SRLNLAARTLQTSIFVKNGPSYAG-IGVG  
GE----GFTTFTIATPTGEGTT-----SARTFARSRCV-----

-----LTNGFSIR-----

>gi++|16760983|ref|NP\_456600.1| putative CoA-dependent proprionaldehyde  
dehydrogenase [Salmonella enterica subsp. enterica serovar Typhi str. CT18]

-----MNTSELETLIRITL-----SEQLTTPAQTPAQPPQGK  
-----GIFQSVS  
EAIDAAHQAFLRYQ-QCPLKTRSAIISAMRQEL--TPLLAALAEESANETGMGNKEDKFL  
KNKAALDNTPGV--EDLTTTALTGDGGMVLFEYS-PFGVIGSVAPSTNPTETIINNSISM  
LAAGNSIYFSPHPGAKKVSLLKISLIEEIAFRCCGIRNLVVTVAEPTFEATQQMMHPRI  
AVLAITGGPGIVAMGMK-SGKKVIGAGAGNPPCIVDETADLVKAAEDIINGASFDYNLPC  
IAEKSLIVVESVAERLVQQM-QTFGALLL-SPADTDKLRVAVCL-----PEGQA-----  
NKKLVGKSPSAMLEAAGIA--VPAKAPRLLIAM-VN--ADDPWVTREQLMPMLPVVKVND  
FDSALALALKVEE--GLHHTAIMHSQNV---SRLNLAARTLQTSIFVKNGPSYAG-IGVG  
GE----GFTTFTIATPTGEGTT-----SARTFARSRCV-----

SupplementalMultipleSequenceAlign.txt

-----  
-----  
-----  
-----  
-----  
-----  
-----  
-----

-----LTNGFSIR-----

>gi++|62180629|ref|YP\_217046.1| propanediol utilization: CoA-dependent propionaldehyde dehydrogenase [Salmonella enterica subsp. enterica serovar Choleraesuis str. SC-B67]

-----MNTSELETLIRTI-----SEQLTTPAQTPAQPGK  
-----GIFQSVS  
EAIDAAHQAFRLRYQ-QCPLKTRSAIISAIRQEL--TPLLATLAEESANETGMGNKEDKFL  
KNKAALDNTPGV--EDLTTTALTGDGGMVLFEYS-PFGVIGSVAPSTNPTETIIINNSISM  
LAAGNSVYFSPHPGAKKVSLLKLSLIEEIAFRCCGIRNLVVTVAEPTFEATQQMMHPRI  
AVLAIITGGPGIVAMGMK-SGKKVIGAGAGNPPCIVDETADLVKAAEDIINGASFDYNLPC  
IAEKSLIVVESVAERLVQQM-QTFGALLL-SPADTDKLRACL-----PEGQA-----  
NKKLVGKSPSAMLEAAGIA--VPAKAPRLLIAL-VN--ADDPWVTSEQLMPMLPVVKVSD  
FDSALALALKVEE--GLHHTAIMHSQNV---SRLNLAARTLQTSIFVKNGPSYAG-IGVG  
GE----GFTTFTIATPTGEGTT-----SARTFARSRCV-----

-----  
-----  
-----  
-----  
-----  
-----  
-----  
-----

-----LTNGFSIR-----

>gi++|56413047|ref|YP\_150122.1| putative CoA-dependent propionaldehyde dehydrogenase [Salmonella enterica subsp. enterica serovar Paratyphi A str. ATCC 9150]

-----MNTSELETLIRTI-----SEQLTTPAQTPAQPGK  
-----GIFQSVS  
EAIDAAHQAFRLRYQ-QCPLKTRSAIISAMRQEL--TPLLATLAEESANETGMGNKEDKFL  
KNKAALDNTPGV--EDLTTTALTGDGGMVLFEYS-PFGVIGSVAPSTNPTETIIINNSISM  
LAAGNSIYFSPHPGAKKVSLLKLSLIEEIAFRCCGIRNLVVTVAEPTFEATQQMMHPRI  
AVLAIITGGPGIVAMGMK-SGKKVI--GAGNPPCIVDETADLVKAAEDIINGASFDYNLPC  
IAEKSLIVVESVAERLVQQM-QTFGALLL-SPADTDKLRACL-----PEGQA-----  
NKKLVGKSPSAMLEAAGIA--VPAKAPRLLIAM-VN--ADDPWVTSEQLMPMLPVVKVND  
FDSALALALKVEE--GLHHTAIMHSQNV---SRLNLAARTLQTSIFVKNGPSYAG-IGVG  
GE----GFTTFTIATPTGEGTT-----SARTFARSRCV-----

-----  
-----  
-----  
-----  
-----  
-----  
-----  
-----

-----LTNGFSIR-----

>gi++|161502785|ref|YP\_001569897.1| hypothetical protein SARI\_00836 [Salmonella enterica subsp. arizonae serovar 62:z4,z23:--]

-----MNTSELEMLIRN-----SEQLTPEKTQTKGN---  
-----GIFQTV-----  
EAIRAAHQAFRLRYQ-QCPLKTRSAIIHAMREEL--APHLASLAEESAAETGMGNKEDKLL  
KNKAALDNTPGI--EDLTTTALTGDGGMVLFEYS-PFGVIGSVAPSTNPTETIIINNSISM  
LAAGNSVYFSPHPGAKSVSLKLGIMIEEIAFRCCGIRNLLVVTVAEPTFEATQQMMSHPDI  
AVLAIITGGPGIVAMGMK-SGKKVIGAGAGNPPCIVDETADLVKAAEDIINGAAFYDYNLPC  
IAEKSLIVVESVAERLIQQM-QAFGALLL-SPSDTDKLRVCL-----QDGH-----  
NKKLVGKSPATLLEASGIA--TPAKTPRLLIAA-VN--ANDPWVTCEQLMPMLPIVKVSD  
FDSALALALKVEA--GLHHTAIMHSENV---SRLNLAARTLQTSIFVKNGPSYAG-IGVG  
GE----GFTTFTIATPTGEGTT-----SARTFARSRCV-----





SupplementalMultipleSequenceAlign.txt

-----  
-----LTNGFSIR-----  
-----

>gi++|215487224|ref|YP\_002329655.1| CoA-dependent proprionaldehyde dehydrogenase  
[Escherichia coli O127:H6 str. E2348/69]

-----MNNSELETLIRNIL-----REQLVPATPRMQRN---  
-----AIFQTVD  
EAVCAAHQAFLRFQ-QCPLKTRSAIISAIREEL--MPRLTELAESAKETGMGNKEDKYL  
KNKAALDNTPGI--EDLTTTALTGDGGMVLF EYS-PFGVIGSVTPSTNPTETIINNSISM  
LAAGNSVYFSPHPGAKNVSLKLIATIEDIAFRCSGIHNLIVTVSEPTFAATEQMM AHPKI  
SVLAITGGPGIVAMGMK-SGKKVIGAGAGNPPCIVDETADIVKAAEDIINGASFDYNLPC  
IAEKSLIVVASVADYLIQQM-QSFGALLL-NHEQTEKLRAICL-----PDGSA-----  
NKKLVGKSPSALLEEAASLP--LPAKAPRLLIAV-VD--ADDSWVTCEQLMPMLPIVKVND  
FDSALALALKVED--GLHHTAIMHSQNV---SRLNLAARVMQTSIFVKNGPSWAG-IGVG  
GE----GFTTFTIATPTGEGTT-----SARTFARSRCV-----  
-----

-----  
-----LTSGFSIR-----  
-----

>gi++|157158089|ref|YP\_001463352.1| propanediol utilization protein PduP  
[Escherichia coli E24377A]

-----MNNSELETLIRNIL-----REQLVPATPRTQRN---  
-----AIFQTVD  
EAVCAAHQAFLRFQ-QCPLKTRSAIISAIREEL--MPRLTELAESAKETGMGNKEDKYL  
KNKAALDNTPGI--EDLTTTALTGDGGMVLF EYS-PFGVIGSVTPSTNPTETIINNSISM  
LAAGNSVYFSPHPGAKNVSLKLITTIEDIAFRCSGIHNLIVTVSEPTFAATEQMM AHPKI  
SVLAITGGPGIVAMGMK-SGKKVIGAGAGNPPCIVDETADIVKAAEDIINGASFDYNLPC  
IAEKSLIVVASVADYLIQQM-QSFGALLL-NYEQTEKLRAICL-----PDGSA-----  
NKKLVGKSPSALLEEAAGLP--LPAKAPRLLIAV-VD--ANDSWVTCEQLMPMLPIVKVND  
FDSALTLALKVED--GLHHTAIMHSQNV---SRLNLAARVMQTSIFVKNGPSWAG-IGVG  
GE----GFTTFTIATPTGEGTT-----SARTFARSRCV-----  
-----

-----  
-----LTSGFSIR-----  
-----

>gi++|218705543|ref|YP\_002413062.1| putative CoA-dependent proprionaldehyde  
dehydrogenase pduP [Escherichia coli UMN026]

-----MNNSELETLIRNIL-----REQLVPATPRMQRN---  
-----AIFQTVD  
EAVCAAHQAFLRFQ-QCPLKTRSAIISAIREEL--IPRLTELAESAKETGMGNKEDKYL  
KNKAALDNTPGI--EDLTTTALTGDGGMVLF EYS-PFGVIGSVTPSTNPTETIINNSISM  
LAAGNSVYFSPHPGAKYVSLKLITTIEDIAFRCSGIHNLIVTVSEPTFAATEQMM AHPKI  
SVLAITGGPGIVAMGMK-SGKKVIGAGAGNPPCIVDETADIVKAAEDIINGASFDYNLPC  
IAEKSLIVVASVADYLIQQM-QSFGALLL-NYEQTEKLRAICL-----PDGSA-----  
NKKLVGKSPSALLEEAAGLP--LPAKAPRLLIAV-VD--ANDSWVTCEQLMPMLPIVKVND  
FDSALTLALKVED--GLHHTAIMHSQNV---SRLNLAARVMQTSIFVKNGPSWAG-IGVG  
GE----GFTTFTIATPTGEGTT-----SARTFARSRCV-----  
-----

-----  
-----LTSGFSIR-----  
-----

SupplementalMultipleSequenceAlign.txt

>gi++|123442957|ref|YP\_001006932.1| putative propanediol utilization protein:  
CoA-dependent propionaldehyde dehydrogenase [*Yersinia enterocolitica* subsp.  
*enterocolitica* 8081]

-----MNTNDLESLIRTIL-----TEQLTPVTAPASS-----  
-----AIFASVD  
EAINAAHSAFLRYQ-QSPMKTRSAIIRAIREQL--KPQLVLSLSEGASETGMGNKEDKFL  
KNKAALENTPGI--EDLSTTALTGDGGMVLFEYS-PFGVIGSVTPSTNPTETIINNSISM  
LAAGNAVYFSPHPGAKAVSLDLIAQIEEIIFNCSGIRNLVVTVKEPSFEATQQMMAHDKI  
ALLAITGGPAIVAMSMK-SGKKVIGAGAGNPPCLVDETAELVCAAQDIVAGASFDYNLPC  
IAEKSLIVVESVADRLLQQM-QAFDALLISNPQEIDSLRKACL-----TPQGHA-----  
NKNLVGKSPIELLKAAGIT--CPAKAPRLLLVE-VA--GDDPLVTTEQLMPLLPVVRVKD  
FDAALTLALHVEG--GLHHTATMHSQNV---SRLNLAARLLQTSIFVKNGPSYAG-IGVG  
GE----GFTTFTIATPTGEGTT-----SARTFARQRCV-----

-----LTNGFSIR-----

>gi++|74312543|ref|YP\_310962.1| putative propanediol utilization protein:  
CoA-dependent propionaldehyde dehydrogenase [*Shigella sonnei* ss046]

-----MPRLTELAESAKETGMGNKEDKYL  
KNKAALDNTPGI--EDLTTTALTGDGGMVLFEYS-PFGVIGSVTPSTNPTETIINNSISM  
LAAGNSVYFSPHPGAKNVSLKLITTIEDIAFRCSGIHNLIVTVSEPTFAATEQMMAHPKI  
SVLAITGGPGIVAMGMK-SGKKVIGAGAGNPPCIVDETADIVKAAEDIINGASFDYNLPC  
IAEKSLIVVASVADYLIQQM-QSFGALLL-NYEQTEKLRAICL-----PDGSA-----  
NKKLVGKSPSALLEAAGLP--LPAKAPRLLIAV-VD--ADDSWVTCEQLMPMLPIVKVKD  
FDSALTLALKVED--GLHHTAIMHSQNV---SRLNLAARVMQTSIFVKNGPSWAG-IGVG  
GE----GFTTFTIATPTGEGTT-----SARTFARSRCV-----

-----LTSGFSIR-----

>gi++|116872539|ref|YP\_849320.1| CoA-dependent propionaldehyde dehydrogenase  
[*Listeria welshimeri* serovar 6b str. SLCC5334]

-----MESLELEQLVKKVL-----LEKLAEQKDVPVKTTTQ  
GAKS-----GIFDVTVD  
EAVQAQVQAQNSYK-EKSLEERRNVVKAIREAL--YPEIESIATRAVAETGMGNVTDKIL  
KNTLAIIEKTPGV--EDLYTEVATGDNGMTLYELS-PYGVIGAVAPSTNPTETLICNTIGM  
LAAGNAVYFSPHPGAKNISLWLIEKLNITVRESCGIDNLVVTVEKPSIQAAQEMMHPKV  
PLLVITGGPGVVLQAMQ-SGKKVIGAGAGNPPSIVDETANIEKAAADIVDGASFDHNILC  
IAEKSVAVDSITDFLLFQM-EKNGALHVTNPSDIKKLEKVAV-----TDKGVT-----  
NKKLVGKSASEILKEAGIT--CDF-TPRLIIVE-TD--KSHPFATVELLMPIVPVVRVPD  
FDEALKVAIELEQ--GLHHTATMHSQNI---SRLNKAARDMQTSIFVKNGPSFAG-LGFR  
GE----GSTTFTIATPTGEGTT-----TARHFARRRRCV-----

-----LTDGFSIR-----

>gi++|16800198|ref|NP\_470466.1| hypothetical protein lin1129 [*Listeria innocua*

SupplementalMultipleSequenceAlign.txt

clip11262]

-----MESLELEQLVKKVL-----LEKLAEQKEVPTKTTTQ  
GAKS-----GVFDTVD  
EAVQAAVIAQNCYK-EKSLEERRNVVKAIREAL--YPEIETIATRAVAETGMGNVTDKIL  
KNTLAIIEKTPGV--EDLYTEVATGDNGMTLYELS-PYGVIGAVAPSTNPTETLICNSIGM  
LAAGNAVIFYSPHPGAKNISLWLEIKLNTIVRDSGIDNLIVTVAKPSIQAAQEMMHPKV  
PLLVITGGPGVVLQAMQ-SGKKVIGAGAGNPPSIVDETANIEKAAADIVDGASFDHNILC  
IAEKSVAVDSIADFLFQM-EKNGALHVTNPSDIQKLEKVAV-----TDKGVT-----  
NKKLVGKSATEILKEAGIA--CDF-TPRLIIVE-TE--KSHPFATVELLMPIVPVVRVPD  
FDEALEVAIELEQ--GLHHTATMHSQNI---SRLNKAARDMQTSIFVKNGPSFAG-LGFR  
GE----GSTTFTIATPTGEGTT-----TARHFARRRRRCV-----

-----LTDGFSIR-----

>gi++|46907383|ref|YP\_013772.1| CoA-dependent propionaldehyde dehydrogenase  
[Listeria monocytogenes str. 4b F2365]

-----MESLELEQLVKKVL-----LEKLAEQKDAPVKTTVK  
GAKS-----GVFDTVD  
EAVQAAVIAQNNYK-EKSLEERRNVVKAIREAL--YPEIESIAARAVAETGMGNVADKIL  
KNTLAIIEKTPGV--EDLYTEVATGDNGMTLYELS-PYGVIGAVAPSTNPTETLICNTIGM  
LAAGNAVIFYSPHPGAKNISLWLEIKLNTIVRESCGIDNLVVTVEKPSIQAAQEMMHPKV  
PLLVITGGPGVVLQAMQ-SGKKVIGAGAGNPPSIVDETANIEKAAADIVDGASFDHNILC  
IAEKSIIVAVDSIADFLMFQM-EKNGALHVTNPSDIQKLEKVAV-----TDKGVT-----  
NKKLVGKSASEILKEAGIV--CDF-SPRLIIVE-TE--KTHPFATVELLMPIVPVVRVFN  
FDEALDVAIELEQ--GLHHTATMHSQNI---SRLNKAARDMQTSIFVKNGPSFAG-LGFR  
GE----GSTTFTIATPTGEGTT-----TARHFARRRRRCV-----

-----LTDGFSIR-----

>gi++|217964766|ref|YP\_002350444.1| ethanolamine utilization protein EutE [Listeria  
monocytogenes HCC23]

-----MESLELEKLVKKVL-----LEKLAEQKDIPVKTTVK  
GAKS-----GVFDTVD  
EAVQAAVIAQNSYK-EKSLEERRNVVKAIREAL--YPEIESIAARAVAETGMGNVADKIL  
KNTLAIIEKTPGV--EDLYTEVATGDNGMTLYELS-PYGVIGAVAPSTNPTETLICNTIGM  
LAAGNAVIFYSPHPGAKNISLWLEIKLNTIVRESCGVDNLVVTVEKPSIQAAQEMMHPKV  
PLLVITGGPGVVLQAMQ-SGKKVIGAGAGNPPSIVDETANIEKAAADIVDGASFDHNILC  
IAEKSIIVAVDSIADFLMFQM-EKNGALHVTNPSDIQKLEKVAV-----TDKGVT-----  
NKKLVGKSASEILKEAGIV--CDF-SPRLIIVE-TE--KTHPFATVELLMPIVPVVRVFN  
FDEALDVAIELEQ--GLHHTATMHSQNI---SRLNKAARDMQTSIFVKNGPSFAG-LGFR  
GE----GSTTFTIATPTGEGTT-----TARHFARRRRRCV-----

-----LTDGFSIR-----

>gi++|16803205|ref|NP\_464690.1| hypothetical protein lmo1165 [Listeria monocytogenes  
EGD-e]

-----MESLELEKLVKKVL-----LEKLAEQKGIPVKTMTK  
GAKS-----GVFDTVD

SupplementalMultipleSequenceAlign.txt

EAVQAAVIAQNSYK-EKSLEERRNVVKAIREAL--YPEIESIAARAVAETGMGNVADKIL  
KNTLAIIEKTPGV--EDLYTEVATGDNGMTLYELS-PYGVIGAVAPSTNPTETLICNTIGM  
LAAGNAVYFSPHPGAKNISLWLEIKLNTIVRESCVDNLVVTVEKPSIQAAQEMMNHHPKV  
PLLVTGGPGVVLQAMQ-SGKKVIGAGAGNPPSIVDETANIEKAAADIVDGASFDHNILC  
IAEKSVVAVDSIADFLMFQM-EKNGALHVTNPSDIQKLEKVAV-----TDKGV-----  
NKKLVGKSASEILKEAGIA--CDF-SPRLIIVE-TE--KTHPFATVELLMPIVPVVRVFN  
FEEALEVAIELEQ--GLHHTATMHSQNI---SRLNKAARDMQTSIFVKNGPSFAG-LGFR  
GE---GSTTFTIATPTGEGTT-----TARHFARRRRCV-----

-----LTDGFSIR-----

>gi++|188590535|ref|YP\_001921227.1| ethanolamine utilization protein Eute  
[Clostridium botulinum E3 str. Alaska E43]

-----MNDFNMIIDIESIVKNIV-----KELTGNEKEQGTITTA  
VPKEVNPLVDIEKKIMGFVNTPTMPIGEH-----GVFEDIN  
DAIEQAWIAEQEYR-KVGLDKRTEIIEAFKAEV--RKNVEEISRRTFEETGMGRYEDKIL  
KNNLALDKTPGV--EDLEAGVKTGDGGLTLYEMS-PFGVIGAIAPSTNPTETIINNGISM  
LAGGNTVVFSPHPGAKDVSVFIIQLINKAIERVNGPKNLIVTVRNPNIESTNIMLAHPKV  
NMICATGGPGIVKVALS-SGKKAIGAGAGNPPVVVDETADIEKAAVDIIDGCSFDNNLPC  
ICEKEVIVVDKVDYLKTCM-SKYCALEITDKNMLAQLEKLVL-----TENGTI-----  
NKKFVVGKNADYIMSKLGVN--IDP-SIRVIFAE-VE--ANHPFAVEELMMPILPVIRVRN  
VDEAIDLGVELEH--GNRHTAIMHSHKI---DNLSKFAKAVQTTIFVKNAPSYAG-IGYG  
AE----GHGTFTIAGPTGEGLT-----SARTFTRKRCV-----

-----MVDNFSIK-----

>gi++|83592250|ref|YP\_426002.1| aldehyde dehydrogenase [Rhodospirillum rubrum ATCC  
11170]

-----MNDGQIAAAVAKVL-----EAYGVPADPSAAAPAPAAPVAPAAPT  
AGSVSEMIARGIAKASSDDQIAQIVAKVVDYSAQAAKPAVVPGAAASTEAGDGVFDTMD  
AAVDAAVLAQQQYL-LCSMTDRQRFVDGIREVILQKDTLELISRMAAEETGMGNYEHKLI  
KNRLAAEKTPGT--EDLTTEAFSGDDGLTLYEYS-PFGAIGAVAPTTNPTETIICNSIGM  
LAAGNSVIFSPHPRATKVSLLTVKLIQKLAACLGAPANLVTVSKPSVENTNAMMAHPKI  
RMLVATGGPGIVKAVMS-TGKKAIGAGAGNPPVVVDETADIEKAAALDIINGCSFDNNLPC  
IAEKEIIAVAQIADYLIFSM-KKQGAYQITDPAVLRKQLDLVL-----TAKGGP-----  
QTSCVKGSAVWLLNKIGIE--VDS-SVKVILME-VP--KEHPFVQEELMMPILPLVRVSD  
VDEAIAVAIEVEH--GNRHTAIMHSTNV---RKLTKMAKLIQTTIFVKNGPSYAG-LGVG  
GE----GYTTFTIAGPTGEGLT-----SAKSFAKRKRCV-----

-----MVEALNIR-----

>gi++|187933041|ref|YP\_001885942.1| ethanolamine utilization protein Eute  
[Clostridium botulinum B str. Eklund 17B]

-----MNDFNMIIDIESIVKNIV-----KELTGNEKEQGAIITAT  
APKEVN-----PLVDIEKKIMGFVNTPTMQAGEYGVFEDIN  
DAIEQAWLAEQEYR-KVGLDKRTEIIEVFKAEV--RKNVEEISRRTFEETGMGRYEDKIL  
KNNLALDKTPGV--EDLEAGVKTGDGGLTLYEMS-PFGVIGAIAPSTNPTETIINNGISM  
LAGGNTVVFSPHPGAKDVSVFIIQLINKAIERVNGPKNLIVTVRNPNIESTNIMLSHPKV

SupplementalMultipleSequenceAlign.txt

NMICATGGPGIVKVALS-SGKKAVGAGAGNPPVVVDETADIEKAAVDIIDGCSFDNNLPC  
ICEKEVIVVDKVTLDYLKTCM-SKYCALEITDKNMLAQLEKLVL-----TENGTI-----  
NKKFVGNADYIMSKLGIN--IDP-SIRVIFAE-VG--ANHPFAVEELMMPILPIIRVRN  
VDEAIELGVELEH--GNRHTAIMHSKHI---DNLKFAKAVQTTIFVKNAPSYAG-IGYG  
AE---GHGFTTIAGPTGEGLT-----SARTFTRKRRCV-----

-----MVDNFSIK-----

>gi++|117626447|ref|YP\_859770.1| ethanolamine utilization protein EutE [Escherichia coli APEC 01]

-----MNDIEIAQAVSTIL-----SKFTKATPDEAP--ATS  
EAARVDGLDEIVAKALAQHSSVRDASAI-----SQVAKVAVANASTGAFDTMD  
EAISAAVLAQVQYR-HCSMQRASRINGIRDVFLQEDVLCALSRMAVEETGMGNYEDKLI  
KNRVAALKTPGI--EDLTTSAVSGDGGLTLIEYS-AFGVIGSITPTTNPTETIINNSIGM  
LAAGNTVVFSPHPRSRLVSLYAVELINNKLAQLGAPANMMVTVTKPSIDNTNVLINDPRI  
NMLVATGGPAIVKTVMS-SGKKAIGAGAGNPPAVVDETADIEKAARDIIKGCSFDNNLPC  
VAEKEVIVVNQVADYL IHCM-KKSGAYLLCDKCLSQQLSLVL-----NEKGTGP-----  
NTAFVVGKDARYILQQLGIQ--VGD-DIKVILIE-AE--KTHPFVHELMPVLPVVRVDN  
VDEAIELAVKVEH--GNRHTAVMHSTNV---EKLTKMARLIQTTIFVKNGPSYAG-LGVG  
GE---GHATFTTIAGPTGEGLT-----SARSFARRRRCV-----

-----MVEALNIR-----

>gi++|26250354|ref|NP\_756394.1| ethanolamine utilization protein eutE [Escherichia coli CFT073]

-----MNDIEIAQAVSTIL-----SKFTKATPDEAP--ATS  
EAARVDGLDEIVAKALAQHSSVRDASAI-----SQ---VAKVANASTGAFDTMD  
EAISAAVLAQVQYR-HCSMQRASRINGIRDVFLQEDVLCALSRMAVEETGMGNYEDKLI  
KNRVAALKTPGI--EDLTTSAVSGDGGLTLIEYS-AFGVIGSITPTTNPTETIINNSIGM  
LAAGNTVVFSPHPRSRLVSLYAVELINNKLAQLGAPANMMVTVTKPSIDNTNVLINDPRI  
NMLVATGGPAIVKTVMS-SGKKAIGAGAGNPPAVVDETADIEKAARDIIKGCSFDNNLPC  
VAEKEVIVVNQVADYL IHCM-KKSGAYLLCDKCLSQQLSLVL-----NEKGTGP-----  
NTAFVVGKDARYILQQLGIQ--VGD-DIKVILIE-AE--KTHPFVHELMPVLPVVRVDN  
VDEAIELAVKVEH--GNRHTAVMHSTNV---EKLTKMARLIQTTIFVKNGPSYAG-LGVG  
GE---GHATFTTIAGPTGEGLT-----SARSFARRRRCV-----

-----MVEALNIR-----

>gi++|167040571|ref|YP\_001663556.1| aldehyde dehydrogenase [Thermoanaerobacter sp. X514]

-----MIDENLVVTITKKIL-----NEINLKEAEKKEKDNP  
DL-----GIFNDVN  
EAVECAKEAQQKFA-LMDLEKREEIIAAIREAC--VNNARLLAEIACSETGRGRVEDKVA  
KNILAAKKTPGT--EDLKPTAWTGDRGLTLVEMA-PVGVIASITPVTNPTATIINNTISM  
LAAGNAVVFNPHPSAKKTSNKAVEIINEAILKVGAPNGLVCSINNPTIQTAKLMEHPEV  
NMVVVTGGKAVVQTALR-CGKKVIGAGAGNPPVVVDETADIVKAAHDIACGASFDNNLPC  
IAEKEIIAVERIADTL LERM-KREGAYVL-HGKDIDRMTELIF-----QGGAI-----  
NKDLIGRDAHFILSQIGIE--TGK-DIRLVVMP-VD--VSHPLVYHEQLMPVIPFVTVPT

SupplementalMultipleSequenceAlign.txt

VEEAINLAVKAEG--GNRH TAMMHSKNV---ENMTAFARAIQTTFVKNAPSYAG-IGFG  
 GE----GYTTFTIAGPTGEGLT-----SARTFTRQRRCV-----

-----  
 -----  
 -----  
 -----  
 -----  
 -----  
 -----  
 -----  
 -----  
 -----  
 -----

>gi++|90422686|ref|YP\_531056.1| aldehyde dehydrogenase [Rhodopseudomonas palustris  
 BisB18]

-----MVAKAIRDHA-----GTAQPSGNAATSSAAVS  
 D-----GVFETMD  
 AAVEAAALAQQQYL-LCSMSDRARFVQGIRDVILNQDTLEKMSRMAVEETGMGNYEHKLI  
 KNRLAGEKTPGI--EDLTTDAFSGDNGLTLVEYS-PFGVIGAITPTTNPTETIVCNSIGM  
 LAAGNSVVFSPHPRARQVSLLLVRLINQKLAALGAPENLVTVKPSIENTNAMMAHPKV  
 RMLVATGGPAIVKAVLS-TGKKAIGAGAGNPPVVVDETANIEKAACDIVNGCSFDNNLPC  
 VAEKEIIAVAQIADYLIFNL-KKNGAYEIKDPAVLQQLQDLVL-----TAKGGP-----  
 QTKCVGKSAVWLLSQIGIS--VDA-SIKIILME-VP--REHPFVQEELMMPILPLVRVET  
 VDDAIDLAIIEVEH--DNRHTAIMHSTDV--RKLTKMAKLIQTTFVKNGPSYAG-LGAG  
 GE----GYSTFTIAGPTGEGLT-----SAKSFARRRKCV-----

-----  
 -----  
 -----  
 -----  
 -----  
 -----  
 -----  
 -----  
 -----  
 -----  
 -----

>gi++|116334184|ref|YP\_795711.1| CoA-dependent propionaldehyde dehydrogenase  
 [Lactobacillus brevis ATCC 367]

-----MNTENIEQAIRKIL-----SEELSNPQSSTATNTTV  
 PGKN-----GIFKTVN  
 EAIAATKAAQENYA-DQPISVRNKVIDAIREGF--RPYIEDMAKRIHDETGMGTVSAKIA  
 KLNNALYNTPGP--EILQPEAETGDGGLVMYEYA-PFGVIGAVGPSTNPSETVIANAIMM  
 LAGGNTLFFGAHPGAKNITRWITIEKLNELVADATGLHNLVVSLETSPSIESVQEVMQHPDV  
 AMLSITGGPAVVHQALI-SGKKAVGAGAGNPPAMV DATANIALAAHNIVDSAADFNNILC  
 TAEKEVVVEAAVKDELIMRM-QQEGAFVLTDSADIEKLAQMTI-----GPKGAP-----  
 DRKFVVGKDATYILDQAGIS--YTG-TPTLIILE-AA--KDHPLVTTEMLMPILPVVCCPD  
 FDSVLATATEVEG--GLHHTASIHSENL---PHINKAAHRLNTSIFVVGPTYCG-TGVA  
 TNGAHSGASALT IATPTGEGTA-----TSKTYTRRRRLN-----

-----  
 -----  
 -----  
 -----  
 -----  
 -----  
 -----  
 -----  
 -----  
 -----  
 -----

>gi++|150018857|ref|YP\_001311111.1| aldehyde dehydrogenase [Clostridium beijerinckii  
 NCIMB 8052]

-----MDVDVVLVEKLVQRQAI-----EEVKNKNLLNLDKFESV  
 KNY-----GIFGTMD  
 AAVEASFVAQKQLL-NASMTDKQKYVDTIKATILKKENLELISRMSVEETEIGKYEHKLI  
 KNRVAAEKTPTGI--EDLTTEAMTGDNGLTLVEYC-PFGVIGAITPTTNPTETIICNSISM  
 IAGGNTVVVFSPHPRAKNVSIKLVTMLNKAL EAGAPDNL IATVKEPSIENTNIMMEHPKI  
 RMLVATGGPAIVNKVMS-TGKKAIGAGAGNPPVVVDETADIEKAAIDIVNGCSFDNNVPC  
 IAEKEVFAVDQICDYLIHYM-KLNGAYEIKDRDLIQKLLDLVT-----NENGGP-----  
 KVSFVGKSAPYILNKLGIS--VDE-NIKVIIME-VE--KNHHFVLEEMMMMPILPIVRTKD  
 VDEAIECAYVAEH--GNRH TAMMHSKNV---DKLTKMARLLETTIFVKNAPSYAG-IGVG  
 GE----GTTTFTIAGPTGEGLT-----TARSFCRKRRCV-----

-----

SupplementalMultipleSequenceAlign.txt

-----  
-----  
-----  
-----  
-----MVDAFNIR-----  
-----

>gi++|26248822|ref|NP\_754862.1| ethanolamine utilization protein eute [Escherichia coli CFT073]

-----MNQQDIEQVVKAVL-----LKMQSSDTPPAAVHEM-----GVFASLD  
DAVAAAKVAQQGLK---SVAMRQLAIAAIREAG--EKHARDLAELAVSETGMGRVEDKFA  
KNVAQARGTPGV--ECLSPQVLTGDNGLTLIENA-PWGVVASVTPSTNPAATVINNAISL  
IAAGNSVIFAPHPAAKKVSQRAITLLNQAIIVAAGGPENLLVTVANPDIETAQRLFKFPGI  
GLLVVTGGEAVVEAARKHTNKRLIAAGAGNPPVVVDETADLARAASIVK GASFDNNIIC  
ADEKVLIVVDSVADELMRLM-EGQHAVKL-TAEQAQQLQSVLL-KNIDERGKGTV-----  
SRDWVGRDAAKIAAAIGLN--VPS-ETRLLFVE-TT--AEHPFAVTELMMPVLPVVRVAN  
VADAIALAVKLEG--GCHHTAAMHSRNI---ENMNQMANAIDT SIFVKNGPCIAG-LGLG  
GE----GWT TMTITPTGEGVT-----SARTFVRLRRCV-----  
-----

-----  
-----  
-----  
-----  
-----LVDAFRIV-----  
-----

>gi++|218700911|ref|YP\_002408540.1| putative aldehyde dehydrogenase, ethanolamine utilization protein [Escherichia coli IAI39]

-----MNQQDIEQVVKAVL-----LKMQSSDTPPAAVHEM-----GVFASLD  
DAVAAAKVAQQGLK---SVVMRQLAIAAIREAG--EKHARDLAELAVSETGMGRVEDKFA  
KNVAQARGTPGV--ECLSPQVLTGDNGLTLIENA-PWGVVASVTPSTNPAATVINNAISL  
IAAGNSVIFAPHPAAKKVSQRAITLLNQAIIVAAGGPENLLVTVANPDIETAQRLFKFPGI  
GLLVVTGGEAVVEAARKHTNKRLIAAGAGNPPVVVDETADLARAASIVK GASFDNNIIC  
ADEKVLIVVDSVADELMRLM-EGQHAVKL-TAEQAQQLQSVLL-KNIDECGKGTV-----  
SRDWVGRDAAKIAAAIGLK--VPE-QTRLLFVE-TT--AEHPFAVTELMMPVLPVVRVAN  
VADAIALAVKLEG--GCHHTAAMHSRNI---ENMNQMANAIDT SIFVKNGPCIAG-LGLG  
GE----GWT TMTITPTGEGVT-----SARTFVRLRRCV-----  
-----

-----  
-----  
-----  
-----  
-----LVDAFRIV-----  
-----

>gi++|170681242|ref|YP\_001744637.1| ethanolamine utilization protein Eute [Escherichia coli SMS-3-5]

-----MNQQDIEQVVKAVL-----LKMQSSDTPPAAVHEM-----GVFASLD  
DAVAAAKVAQQGLK---SVAMRQLAIAAIREAG--EKHARDLAELAVSETGMGRVEDKFA  
KNVAQARGTPGV--ECLSPQVLTGDNGLTLIENA-PWGVVASVTPSTNPAATVINNAISL  
IAAGNSVIFAPHPAAKKVSQRAITLLNQAIIVAAGGPENLLVTVANPDIETAQRLFKFPGI  
GLLVVTGGEAVVEAARKHTNKRLIAAGAGNPPVVVDETADLARAASIVK GASFDNNIIC  
ADEKVLIVVDSVADELMRLM-EGQHAVKL-TAEQAQQLQSVLL-KNIDECGKGTV-----  
SRDWVGRDAAKIAAAIGLK--VPE-QTRLLFVE-TT--AEHPFAVTELMMPVLPVVRVAN  
VADAIALAVKLEG--GCHHTAAMHSRNI---ENMNQMANAIDT SIFVKNGPCIAG-LGLG  
GE----GWT TMTITPTGEGVT-----SARTFVRLRRCV-----  
-----

-----  
-----  
-----  
-----  
-----  
-----



SupplementalMultipleSequenceAlign.txt

-----  
-----LVDAFRIV-----  
-----

>gi++|161612791|ref|YP\_001586756.1| hypothetical protein SPAB\_00490 [Salmonella enterica subsp. enterica serovar Paratyphi B str. SPB7]

-----MNQQDIEQVVKAVL-----LKMKDSSQPASTVHEM-----  
-----GVFASLD-----  
DAVAAAKRAQQGLK--SVAMRQLAIHAIREAG--EKHARELAELAVSETGMGRVDDKFA  
KNVAQARGTPGV--ECLSPQVLTGDNGLTLIENA-PWGVVASVTPSTNPAATVINNAISL  
IAAGNSVVFAPHPAAKKVSQRAITLLNQAVVAAGGPENLLVTVANPDIETAQRLFKYPGI  
GLLVVTGGEAVVDAARKHTNKRLIAAGAGNPPVVVDETADLPRAAQSIKVGASFDNNIIC  
ADEKVLIVVDSVADELMRLM-EGQHAVKL-TAAQAEQLQPVLL-KNIDERGKGTV-----  
SRDWVGRDAGKIAAAIQLN--VPD-QTRLLFVE-TS--ANHPFAVTELMMPVLPVVRVAN  
VEEAIALAVQLEG--GCHHTAAMHSRNI---DNMNQMANAIDTSIFVKNGPCIAG-LGLG  
GE----GWTMTITPTGEGVT-----SARTFVRLRRCV-----  
-----

-----  
-----LVDAFRIV-----  
-----

>gi++|152971320|ref|YP\_001336429.1| ethanolamine utilization protein [Klebsiella pneumoniae subsp. pneumoniae MGH 78578]

-----MNQQDIEQVVKAVL-----LKMKDSSQPAGTVHDM-----  
-----GVFASLD-----  
DAVAAATVAQQGLK--RVAMRQQVIQAIAREAG--EKYARELAELAVTETGMGRVEDKFA  
KNVAQARGTPGV--ECLTPQVLTGDNGLTLIENA-PWGVVASVTPSTNPAATVINNAISL  
IAAGNSVVFAPHPAAKKISQRAITLLNQAVVAAGGPANLLVTVANPDIDTAQRLFKYPGI  
GLLVVTGGEAVVEAARKHTNKRLIAAGAGNPPVVVDETADLPRAAQAIKVGASFDNNIIC  
ADEKVLIVVDSVADELMRLM-EGQAVKL-TAAQAEQLQPLLL-KNIDERGKGTV-----  
SRDWVGRDAGKIAAAIQLQ--VPA-QTRLLFVE-TP--ASHPFAVTELMMPVLPVVRVAN  
VEEAIALAVQLEG--GCHHTAAMHSRNI---DNMNQMANAIDTSIFVKNGPCIAG-LGLG  
GE----GWTMTITPTGEGVT-----SARTFVRLRRCV-----  
-----

-----  
-----LVDAFRIV-----  
-----

>gi++|110642627|ref|YP\_670357.1| ethanolamine utilization protein Eute [Escherichia coli 536]

-----MNQQDIEQVVKAVL-----LKMQSSDTPPAAVHEM-----  
-----GVFASLD-----  
DAVAAAKVAQQGLK--SVAMRQLAIAAIREAG--EKHARDLAELAVSETGMGRVEDKFA  
KNVAQARGTPGV--ECLSPQVLTGDNGLTLIENA-PWGVVASVTPSTNPAATVINNAISL  
IAAGNSVIFAPHPAAKKVSQRAITLLNQAIVAAGGPENLLVTVANPDIETAQRLFKFPGI  
GLLVVTGGEAVVEAARKHTNKRLIAAGAGNPPVVVDETADLARAQSIKVGASFDNNIIC  
ADEKVLIVVDSVADELMRLM-EGQHAVKL-TAEQAQLQSVLL-KNIDERGKGTV-----  
SRDWVGRDAKIAAAIQLK--VPE-QTRLLFVE-TT--AEHPFAVTELMMPVLPVVRVAN  
VADAIALAVKLEG--GCHHTAAMHSRNI---ENMNQMANAIDTSIFVKNGPCIAG-LGLG  
GE----GWTMTITPTGEGVT-----SARTFVRLRRCV-----  
-----

-----  
-----LVDAFRIV-----  
-----

SupplementalMultipleSequenceAlign.txt

>gi++|218705953|ref|YP\_002413472.1| putative aldehyde dehydrogenase, ethanolamine utilization protein [Escherichia coli UMN026]

-----MNQQDIEQVVKAVL-----LKMQSSDTPPAVHEM-----GVFASLD  
DAVAAAKVAQQGLK---SVAMRQLAIAAIREAG--EKHARDLAELAVSETGMGRVEDKFA  
KNVAQARGTPGV--ECLSPQVLTGDNGLTLIENA-PWGVVASVTPSTNPAATVINNAISL  
IAAGNSVIFAPHPAAKKVSQRAITLLNQAIVAAGGPENLLVTVANPDIETAQRLFKFPGI  
GLLVVTGGEAVVEAARKHTNKRLIAAGAGNPPVVVDETADLARAASIVKGFASFDNNIIC  
ADEKVLIVVDSVADELMRLM-EGQHAVKL-TAEQAQQLQPVLL-KNIDEHGKGTV-----  
SRDWVGRDAAKIAAAIGLT--VPE-QTRLLFVE-TT--AEHPFAVTELMMPVLPVVRVAN  
VADAIALAVKLEG--GCHHTAAMHSRNI---ENMNQMANAIDTSIFVKNGPCIAG-LGLG  
GE----GWTMTITPTGEGVT-----SARTFVRLRRCV-----

-----LVDAFRIV-----

>gi++|218782808|ref|YP\_002434126.1| Aldehyde Dehydrogenase [Desulfatibacillum alkenivorans AK-01]

-----MSVKEFALEDMVASVI-----MEMMNKDDSCQPTGD-----GIYETID  
EAVAKAKAAQPLI-SLSLEKREAILTAIRKIS--LEKNEEWAKATVAETGLGRVEDKIA  
ENILAATKTPGT--EDLDAKALSGDAGLTLIEYA-PFGVIGSLTPVTNATGTLINNTISM  
LAGGNTVVYVNVHPSALKISTEVIRTFHKVIVENGGPEGVGMVATPTMETAGEIMAHPI  
NVLVATGGAGVVKAVLS-SGKKAIGAGAGNPPVLVDETACIRKAAEEIAGHSINNNIFC  
ISEKEVIAVDEVADNLLKFM-EETGKAAILTPEEAQKVTETVI-----HDNHV-----  
VKDYVGNASVIEGAGLTRLAGKKDLRCLVFE-AD--CKHPMVWIEQMMPVLPVVRVKD  
VWEGIDLAVKVEQ--GNRHTAMMHSTNV---EHLTALARAIQTTIFVKNGPSYSG-IGLN  
GE----GHATFTIAGPTGEGIT-----SAKSFCRQRRCV-----

-----LIDSFRIV-----

>gi++|16765783|ref|NP\_461398.1| putative aldehyde oxidoreductase [Salmonella typhimurium LT2]

-----MNQQDIEQVVKAVL-----LKMKDSSQPASTVHEM-----GVFASLD  
DAVAAAKRAQQGLK---SVAMRQLAIHAIREAG--EKHARELAELAVSETGMGRVDDKFA  
KNVAQARGTPGV--ECLSPQVLTGDNGLTLIENA-PWGVVASVTPSTNPAATVINNAISL  
IAAGNSVVFAPHPAAKKVSQRAITLLNQAVVAAGGPENLLVTVANPDIETAQRLFKYPGI  
GLLVVTGGEAVVDAARKHTNKRLIAAGAGNPPVVVDETADLPRAAQSIVKGFASFDNNIIC  
ADEKVLIVVDSVADELMRLM-EGQHAVKL-TAAQAEQLQPVLL-KNIDERGKGTV-----  
SRDWVGRDAGKIAAAIGLN--VPD-QTRLLFVE-TP--ANHPFAVTEMMMPVLPVVRVAN  
VEEAIALAVQLEG--GCHHTAAMHSRNI---DNMNQMANAIDTSIFVKNGPCIAG-LGLG  
GE----GWTMTITPTGEGVT-----SARTFVRLRRCV-----

-----LVDAFRIV-----

>gi++|206580835|ref|YP\_002237208.1| ethanolamine utilization protein EutE [Klebsiella pneumoniae 342]

SupplementalMultipleSequenceAlign.txt

-----MNQQDIEQVVKAVL-----LKMKDSSQPADAVHDR-----GVFASLD  
DAVAAATVAQQGLK---RVAMRQQVIQAIAREAG--EKHARELAELAVTETGMGRVEDKFA  
KNVAQARGTPGV--ECLTPQVLTGDNGLTLIENA-PWGVVASVTPSTNPAATVINNAISL  
IAAGNSVVFAPHPAAKQVSQRAITLLNQAVVAAGGPANLLVTVANPDIQRLFKYPGI  
GLLVVTGGEAVVEAARKHTNKRLIAAGAGNPPVVVDETADLPRAAQAIKVGASFDNNIIC  
ADEKVLIVVDSVADELMRLM-EGQAVKL-TAAQAEQLQPLLL-KNIDERGKGTV-----  
SRDWVGRDAGKIAAAIGLQ--VPA-QTRLLFVE-TP--ASHPPFAVTELMMPVLPVVRVAN  
VEEAIALAVQLEG--GCHHTAAMHSRNI---DNMNQMANAIDTSIFVKNGPCIAG-LGLG  
GE----GWTMTITPTGEGVT-----SARTFVRLRRCV-----

-----LVDAFRIV-----

>gi++|91211784|ref|YP\_541770.1| ethanolamine utilization protein Eute acetaldehyde  
dehydrogenase [Escherichia coli UTI89]

-----MNQQDIEQVVKAVL-----LKMQSSDTPPAAVHEM-----GVFASLD  
DAVAAAKVAQQGLK---SVAMRQLAIAAIREAG--EKHARDLAELAVSETGMGRVEDKFA  
KNVAQARGTPGV--ECLSPQVLTGDNGLTLIENA-PWGVVASVTPSTNPAATVINNAISL  
IAAGNSVIFAPHPAAKKVSQRAITLLNQAIIVAAGGPENLLVTVANPDIETAQRLFKFPGI  
GLLVVTGGEAVVEAARKHTNKRLIAAGAGNPPVVVDETADLAAAQSIKVGASFDNNIIC  
ADEKVLIVVDSVADELMRLM-EGHAVKL-TAEQAQQLQPVLL-KNIDERGKGTV-----  
SRDWVGRDAAKIAAAIGLK--VPE-QTRLLFVE-TT--AEHPFAVTELMMPVLPVVRVAN  
VADAIALAVKLEG--GCHHTAAMHSRNI---ENMNQMANAIDTSIFVKNGPCIAG-LGLG  
GE----GWTMTITPTGEGVT-----SARTFVRLRRCV-----

-----LVDAFRIV-----

>gi++|74312980|ref|YP\_311399.1| Eute [Shigella sonnei ss046]

-----MNQQDIEQVVKAVL-----LKMQSSDTPPAAVHEM-----GVFASLD  
DAVAAAKVAQQGLK---SVAMRQLAIAAIREAG--EKHARDLAELAVSETGMGRVEDKFA  
KNVAQARGTPGV--ECLSPQVLTGDNGLTLIENA-PWGVVASVTPSTNPAATVINNAISL  
IAAGNSVIFAPHPAAKKVSQRAITLLNQAIIVAAGGPENLLVTVANPDIETAQRLFKFPGI  
GLLVVTGGEAVVEAARKHTNKRLIAAGAGNPPVVVDETADLAAAQSIKVGASFDNNIIC  
ADEKVLIVVDSVADELMRLM-EGHAVKL-TAEQAQQLQPVLL-KNIDERGKGTV-----  
SRDWVGRDAAKIAAAIGLN--VPQ-ETRLLFVE-TT--AEHPFAVTELMMPVLPVVRVAN  
VADAIALAVKLEG--GCHHTAAMHSRNI---ENMNQMANAIDTSIFVKNGPRIAG-LGLG  
GE----GWTMTITPTGEGVT-----SVRTFVRLRRCV-----

-----LVDAFRIV-----

>gi++|82544904|ref|YP\_408851.1| ethanolamine utilization [Shigella boydii sb227]

-----MNQQDIEQVVKAVL-----LKMQSSDTPPAAVHEM-----GVFASLD  
DAVAAAKVAQQGLK---SVAMRQLAIAAIREAG--EKHARDLAELAVSETGMGRVEDKFA  
KNVAQARGTPGV--ECLSPQVLTGDNGLTLIENA-PWGVVASVTPSTNPAATVINNAISL  
IAAGNSVIFAPHPAAKKVSQRAITLLNQAIIVAAGGPENLLVTVANPDIETAQRLFKFPGI



SupplementalMultipleSequenceAlign.txt

VADAIALAVKLEG--GCHHTAAMHSRNI---ENMNQMANAIDTSIFVKNGPCIAG-LGLG  
GE----GWTMTITPTGEGVT-----SARTFVRLRRCV-----

-----LVDAFRIV-----

>gi++|157161914|ref|YP\_001459232.1| ethanolamine utilization protein Eute  
[Escherichia coli HS]

-----MNQQDIEQVVKAVL-----LKMQSSDTPPAVHEM-  
-----GVFASLD  
DAVAAAKVAQQGLK---SVAMRQLAIAAIREAG--EKHARDLAELAVSETGMGRVEDKFA  
KNVAQARGTPGV--ECLSPQVLTGDNGLTLIENA-PWGVVASVTPSTNPAATLINNAISL  
IAAGNSVIFAPHPAAKKVSQRAITLLNQAIVAAGGPENLLVTVANPDIETAQRLFKFPGI  
GLLVVTGGEAVVEAARKHTNKRLIAAGAGNPPVVVDETADLARAASIVKGFASFDNNIIC  
ADEKVLIVVDSVADELMRLM-EGQHAVKL-TAEQAQQLQPVLL-KNIDERGKGTV-----  
SRDWVGRDAAKIAAAIGLN--VPQ-ETRLLFVE-TT--AEHPFAVTELMMPVLPVVRVAN  
VADAIALAVKLEG--GCHHTAAMHSRNI---ENMNQMANAIDTSIFVKNGPCIAG-LGLG  
GE----GWTMTITPTGEGVT-----SARTFVRLRRCV-----

-----LVDAFRIV-----

>gi++|157154906|ref|YP\_001463775.1| ethanolamine utilization protein Eute  
[Escherichia coli E24377A]

-----MNQQDIEQVVKAVL-----LKMQSSDTPSAVHEM-  
-----GVFASLD  
DAVAAAKVAQQGLK---SVAMRQLAIAAIREAG--EKHARDLAELAVSETGMGRVEDKFA  
KNVAQARGTPGV--ECLSPQVLTGDNGLTLIENA-PWGVVASVTPSTNPAATVINNAISL  
IAAGNSVIFAPHPAAKKVSQRAITLLNQAIVAAGGPENLLVTVANPDIETAQRLFKFPGI  
GLLVVTGGEAVVEAARKHTNKRLIAAGAGNPPVVVDETADLARAASIVKGFASFDNNIIC  
ADEKVLIVVDSVADELMRLM-EGQHAVKL-TAEQAQQLQPVLL-KNIDERGKGTV-----  
SRDWVGRDAAKIAAAIGLN--VPQ-ETRLLFVE-TT--AEHPFAVTELMMPVLPVVRVAN  
VADAIALAVKLEG--GCHHTAAMHSRNI---ENMNQMANAIDTSIFVKNGPCIAG-LGLG  
GE----GWTMTITPTGEGVT-----SARTFVRLRRCV-----

-----LVDAFRIV-----

>gi++|215487756|ref|YP\_002330187.1| predicted aldehyde dehydrogenase, ethanolamine  
utilization protein [Escherichia coli O127:H6 str. E2348/69]

-----MNQQDIEQVVKAVL-----LKMQSSDTPPAVHEM-  
-----GVFASLD  
DAVAAAKVAQQGLK---SVAMRQLAIAAIREAG--EKHARDLAELAVSETGMGRVEDKFA  
KNVAQARGTPGV--ECLSPQVLTGDNGLTLIENA-PWGVVASVTPSTNPAATVINNAISL  
IAAGNSVIFAPHPAAKKVSQRAITLLNQAIVAAGGPENLLVTVANPDIETAQRLFKFPGI  
GLLVVTGGEAVVEAARKHTNKRLIAAGAGNPPVVVDETADLARAASIVKGFASFDNNIIC  
ADEKVLIVVDSVADELMRLM-EGQHAVKL-TAEQAQQLQSVLL-KNIDERGKGTV-----  
SRDWVGRDAAKIAAAIGLN--VPS-ETRLLFVE-TT--AEHPFAVTELMMPVLPVVRVAN  
VADAIALAVKLEG--GCHHTAAMHSRNI---ENMNQMANAIDTSIFVKNGPCIAG-LGLG  
GE----SWTTMTITPTGEGVT-----SARTFVRLRRCV-----

SupplementalMultipleSequenceAlign.txt

-----  
-----  
-----  
-----  
-----LVDAFRIV-----  
-----

>gi++|218548112|ref|YP\_002381903.1| putative aldehyde dehydrogenase, ethanolamine utilization protein [Escherichia fergusonii ATCC 35469]

-----MNQQDIEQVVKAVL-----LKMQSSDTPPASVHEM-----GVFASLD  
DAVAAAKIAQQGLK---SVAMRQLAIAAIREAG--EKHARDLAELAVSETGMGRVEDKFA  
KNVAQARGTPGV--ECLSPQVLTGDNGLTLIENA-PWGVVASVTPSTNPAATVINNAISL  
IAAGNSVIFAPHPAAKKVSQRAITLLNQAIVAAGGPENLLVTVANPDIETAQRLFKFPGI  
GLLVVTGGEAVVEAARKHTNKRLIAAGAGNPPVVVDETADLARAASIVKGGASFDNNIIC  
ADEKVLIVVDSVADELMRLM-EGQHAVKL-TAEQAQQLQPVLL-KNIDERGKGTV-----  
SRDWVGRDAAKIAAAIGLN--VPQ-ETRLLFVE-TP--AEHPFAMTELMPVLPVVRVAN  
VADAIALAVKLEG--GCHHTAAMHSRNI---ENMNQMANAIDTSIFVKNGPCIAG-LGLG  
GE----GWTMTITPTGEGVT-----SARTFVRLRRCV-----

-----  
-----  
-----  
-----  
-----LVDAFRIV-----  
-----

>gi++|16761381|ref|NP\_456998.1| putative aldehyde dehydrogenase [Salmonella enterica subsp. enterica serovar Typhi str. CT18]

-----MNQQDIEQVVKAVL-----LKMKDSSQPASTVHEM-----GVFASLD  
DEVAAAKRAQQGLK---SVAMRQLAIHAIREAG--EKHARELAELAVSETGMGRVDDKFA  
KNVAQARGTPGV--ECLSPQVLTGDNGLTLIENA-PWGVVASVTPSTNPAATVINNAISL  
IAAGNSVVFAPHPAAKKVSQRAITLLNQAVVAAGGPENLLVTVANPDIETAQRLFKYPGI  
GLLVVTGGEAVVDAARKHTNKRLIAAGAGNPPVVVDETADLPRAAQSIKGGASFDNNIIC  
ADEKVLIVVDSVADELMRLM-EGQHAVKL-TAAQAEQLQPVLL-KNIDERGKGTV-----  
SRDWVGRDAGKIAAAIGLN--VPD-QTRLLFVE-TP--ANHPFAVTEMMMPVLPVVRVAN  
VEDAIALAVQLEG--GCHHTAAMHSRNI---DNMNQMANAIDTSIFVKNGPCIAG-LGLG  
GE----GWTMTITPTGEGVT-----SARTFVRLRRCV-----

-----  
-----  
-----  
-----  
-----LVDAFRIV-----  
-----

>gi++|187730631|ref|YP\_001881246.1| ethanolamine utilization protein Eute [Shigella boydii CDC 3083-94]

-----MNQQDIEQVVKAVL-----LKMQSSDTPPAVHEM-----GVFASLD  
DAVAAAKVAQQGLK---SVAMRQLAIAAIREAG--EKHARDLAELAVSETGMGRVEDKFA  
KNVAQARGTPGV--ECLSPQVLTGDNGLTLIENA-PWGMVASVTPSTNPAATVINNAISL  
IAAGNSVIFAPHPAAKKVSQRAITLLNQAIVAAGGPENLLVTVANPDIETAQRLFKFPGI  
GLLVVTGGEAVVEAARKHTNKRLIAAGAGNPPVVVDETADLARAASIVKGGASFDNNIIC  
ADEKVLIVVDSVADELMRLM-EGQHAVKL-TAEQAQQLQPVLL-KNIDERGKGTV-----  
SRDWVGRDAAKIAAAIGLN--VPQ-ETRLLFVE-TT--AEHPFAVTELMMPVLPVVRVAN  
VADAIALAVKLEG--GCHHTAAMHSRNI---ENMNQMANAIDTSIFVKNGPCIAG-LGLG  
GE----GWTMTITPTGEGVT-----SARTFVRLRRCV-----

-----  
-----  
-----  
-----  
-----  
-----

SupplementalMultipleSequenceAlign.txt

-----  
-----LVDAFRIV-----  
-----

>gi++|218690581|ref|YP\_002398793.1| putative aldehyde dehydrogenase, ethanolamine utilization protein [Escherichia coli ED1a]

-----MNQQDIEQVVKAVL-----LKMQSSDTPPAAVHEM-----GVFASLD  
DAVAAAKVAQQGLK---SVAMRQLAIAAIREAG--EKHARDLAELAVSETGMGRVEDKFA  
KNVAQARGTPGV--ECLSPQVLTGDNGLTLIENA-PWGVVASVTPSTNPAATVINNAISL  
IAAGNSVIFAPHPAAKKVSQRAITLLNQAIVAAGGPENLLVTVANPDIETAQRLFKFPGI  
GLLVVTGGEAVVEAARKHTNKRLIAAGAGNPPVVVDETADLARAASIVKGFASFDNNIIC  
ADEKVLIVVDSVADELMRLM-EGQHAVKL-TAEQAQQLQSVLL-KNIDECGKGTV-----  
SRDWVGRDAAKIAAAIDLK--VPE-QTRLLFVE-TT--AEHPFAVTELMMPVLPVVRVAN  
VADAIALAVKLEG--GCHHTAAMHSRNI---ENMNQMANAIDTSIFVKNGPCIAG-LGLG  
GE----GWTMTITPTGEGVT-----SARTFVRLRRCV-----

-----  
-----LVDAFRIV-----  
-----

>gi++|62181029|ref|YP\_217446.1| putative aldehyde oxidoreductase in ethanolamine utilization [Salmonella enterica subsp. enterica serovar Choleraesuis str. SC-B67]

-----MNQQDIEQVVKAVL-----LKMKDSSQPASTVHEM-----GVFASLD  
DAVAAAKRAQQGLK---SVAMRQLAIHAIREAG--EKHARELAELAVSETGMGRVDDKFA  
KNVAQARGTPGV--ECLSPQVLTGDNGLTLIENA-PWGVVASVTPSTNPAATVINNAISL  
IAAGNSVVFAPHPAAKKVSQRAITLLNQAVVAAGGPENLLVTVANPDIETAQRLFKYPGI  
GLLVVTGGEAVVDAARKHTNKRLIAAGAGNPPVVVDETADLPRAAQSIKGFASFDNNIIC  
ADEKVLIVVDSVADELMRLM-EGQHAVKL-TAAQAEQLQPVLL-KNIDECGKGTV-----  
SRDWVGRDAGKIAAAIGLN--VPD-QTRLLFVE-TP--ANHPFAVTEMMMPVLPVVRVAN  
VEEAIALAVQLEG--GCHYTAAMHSRNI---DNMNQMANAIDTSIFVKNGPCIAG-LGLG  
GE----GWTMTITPTGEGVT-----SARTFVRLRRCV-----

-----  
-----LVDAFRIV-----  
-----

>gi++|170019261|ref|YP\_001724215.1| aldehyde dehydrogenase [Escherichia coli ATCC 8739]

-----MNQQDIEQVVKAVL-----LKMQSSDTPPAAVHEM-----GVFASLD  
DAVAAAKVAQQGLK---SVAMRQLAIAAIREAG--EKHARDLAELAVSETGMGRVEDKFA  
KNVAQARGTPGV--ECLSPQVLTGDNGLTLIENA-PWDVVASVTPSTNPAATVINNAISL  
IAAGNSVIFAPHPAAKKVSQRAITLLNQAIVAAGGPENLLVTVANPDIETAQRLFKFPGI  
GLLVVTGGEAVVEAARKHTNKRLIAAGAGNPPVVVDETADLARAASIVKGFASFDNNIIC  
ADEKVLIVVDSVADELMRLM-EGQHAVKL-TAEQAQQLQPVLL-KNIDERGKGTV-----  
SRDWVGRDAAKIAAAIGLN--VPQ-ETRLLFVE-TT--AEHPFAVTELMMPVLPVVRVAN  
VADAIALAVKLEG--GCHHTAAMHSRNI---ENMNQMANAIDTSIFVKNGPCIAG-LGLG  
GE----GWTMTITPTGEGVT-----SARTFVRLRRCV-----

-----  
-----LVDAFRIV-----  
-----

SupplementalMultipleSequenceAlign.txt

>gi++|148544941|ref|YP\_001272311.1| 50S ribosomal protein L29P [Lactobacillus reuteri DSM 20016]

-----MQINDIESAVRKIL-----AEELDNASSSSANVAAT  
TDNGHR-----GIFTNVN  
DAIAAAKAAQEIYR-DKPIAVRQQVIDAIKEGF--RPYIEKMAKDIKEETGMGTVEAKIA  
KLNNALYNTPGP--EILEPVENGDGGMVMYERL-PYGVIGAVGPSTNPSETVIANAAIMM  
LAGGNTLYFGAHPGAKNVTRWTIEKMNDFIADATGLHNLVVSIIETPTIESVQMMKHPDI  
AMLAVTGGPAVVHQAMT-SGKKAVGAGPGNPPAMVDATADIDLAHNIITSASFNDILC  
TAEKEVVAESSIKDELIRKM-QDEGAFVV-NREQADKLADMCI-----QENGAP-----  
DRKFVVGKDATYILDQANIP--YTG-HPVEIICE-LP--KEHPLVMTEMLMPLPVVSCPT  
FDDVLKTAVEVEK--GNHHTATIHSNNL---KHINNAHRMQCSIFVVNGPSYVG-TGVA  
DNGAHSGASALTIAPTPTGEGTC-----TARTFTRRVRLN-----  
-----  
-----  
-----  
-----  
-----  
-----

-----SPQGFSVRNWY-----  
-----

>gi++|150018866|ref|YP\_001311120.1| aldehyde dehydrogenase [Clostridium beijerinckii NCIMB 8052]

-----MDINYKFFN-----NEEL-----  
-----KS-----GVFSSVN  
DAVLAAVGAYNQYS-KFTLNERQEIIINSIKEKL--LSRVEEIAYMTVEETGMGNVHDKIE  
KLILAIKKTPIG--EDLITEVRTGDNGMTLYELS-SYGVICAIHPCTNPCATLISNTIGM  
LAAGNGVVHCPHPRAIKVSKYVTEIISIAIRERCGIDNLVVTLNENSITCTNEIMTHPDI  
SMVVTGGNNVLRQAMA-SGKKVIGAGPGNPTTIVDETGDIKKAARDIVRGASFDNNIMC  
ISEKSIVAVSSIADLLVEEL--VRNKVYYVDNDEEMLKLTVATL-----TSDMTL-----  
NKTLEGKSANEILKAAGIV--CER-DIKLIV---VNTIKQHPFATVEMLMPLVPLIRVKN  
FEIALDTALEIEQ--GFRHTATIHSQSI---ERLNVAAKVMQTAFFVKN GASLVG-IGCN  
GE-----GDSFTIATITGEGTT-----TARHFARRRRCS-----  
-----  
-----  
-----  
-----  
-----

-----LTNGFSIR-----  
-----

>gi++|160879327|ref|YP\_001558295.1| aldehyde dehydrogenase [Clostridium phytofermentans ISDg]

-----MTVNEQLVQDIKNNV-----ASMQLTQTNKTEL-----  
-----GVFDDMN  
QAIEAAKEAQLVVK-KMSMDQREKIIISAIRKKT--IEHAETLARMAVEETGMGNVGHKIL  
KHQLVAEKTPGT--EDITTTAWSGDRGLTLVEMG-PFGVIGAITPCTNPSETIICNTIGM  
LAGGNTVVFNPHPAAIKTSNFAVQLINEASLSAGGPVNIACSVRKPTLDSSKIMMSHQDI  
PLIAATGGPGVVTAVLQ-SGKRGIGAGAGNPPVLVDETADIRKAAEDIINGCTFDNNLPC  
IAEKEVVAIDAIANELMNYMVKEQGCYAI-TKEQKEKLTNLVI-----TPKGL-----  
NRNCVGDARTLLGMIGID--VPS-NIRCIIFE-GE--KEHPLISEELMMPILGIVRAKS  
FDDAVEKAVWLEH--GNRHSAAHIHKNV---DRITTYAKAIDTAILVKNAPSAAA-IGFG  
GE-----GFCTFTIASRTGEGLT-----SASTFTKRRRCV-----  
-----  
-----  
-----  
-----  
-----

-----MSDSL CIR-----  
-----

>gi++|51246891|ref|YP\_066775.1| ethanolamine utilization protein (EutE) [Desulfotalea psychrophila Lsv54]



SupplementalMultipleSequenceAlign.txt

```

-----MSIGREQIESIVAEEVI-----SQIGNVQQGAPVLSGSA
AGDW-----GVFDELD
DAVAAAKAACKLID---TVAMRTRVVEVMRRAA--RMNARPLAEKAVAETGMGNIEDKVL
KTLLEVANSTPGP--EILQPTAITGDDGFTLIENA-PWGVIA SVTPSTNPGSTVINNGISM
ISGGNAVVFAPHPAAKRITQEAIKLMNKAI AEEETGINNLLVCIKEPSLDAAQRLFTYPGI
NLLTVTGG EAVVKAARKVTDKRLIAAGAGNPPVVVDETADLARA AESIYIGASFDNNLIC
ANEKEIIVVESVADQFKREF-VAAGAFEI-SLEQAEAI GKTVL--LDYGTDKCRA-----
NPKWVGRDAYKLAELIGVT--IPA-GCKLLFVD-VKGDARHPFAVTEQMMPLIPVVRARN
FDQALEWALMLER--GLSHTAGLHSTNI---HNMERMAKAVNTSLFVKNGPHIAG-LGAG
GE----GWTSM TISTPTGEGVT-----NAATFVRLRRC A-----

```

-----LVGSFRIV-----

>gi++|51246880|ref|YP\_066764.1| ethanolamine utilization protein (Eute)  
[Desulfotalea psychrophila Lsv54]

```

-----MELEMSIGQAQIESIVSEVL-----AQLSKAQNGSLV--ASA
PAAGDW-----GVFDELD
DAVAAAKVAYKLID---TVAMRNRVVDVMRRAA--RMNARRLSEMAVSETGMGNVEDKVA
KTLLEVANRTPGP--EILQPTAITGDEGFTLIENA-PWGVIA SVTPSTNPGSTVINNGISM
ISGGNSVVFAPHPAAKRITQETIKMMNKAI VEETGVHLLVCIKEPSLDAARRLFTYEGI
NLLTVTGG EAVVAAAARKITDKRLIAAGAGNPPVVVDETADLARA AESIYIGASFDNNLIC
ANEKEIIVDSVADEFKREF-TAIGAFEI-SLAQAETI GKTVL--LDYGTDKCRA-----
NPKWVGRDAYKLADLAGIT--IPK-GCKLLFVD-VKGDARHPFAVTEQMMPLIPVVRARN
FDQALEWALMLER--GLSHTAGM HSTNI---HNMEKMAKAVNTSLFVKNGPHIAG-LGAG
GE----GWTSM TISTPTGEGVS-----NAATFVRLRRC A-----

```

-----LVGSFRIV-----

>gi++|120554161|ref|YP\_958512.1| aldehyde dehydrogenase [Marinobacter aquaeolei VT8]

```

-----MQTDAQQIESIVRRVI-----EQLHSPQRDGESY-----
-----GVFRTL D
DAVAGAQQAYKKIR---TMAQREAI IAAIRRTG--SENVQALSELAVQETGFGFRVEDKIR
KHRLVLDKTPGI--EAI VPMAVTGDHGLSLIENA-PWGVIA SVTPSTNPSATILNNAISM
IAAGNSVVFSPHPAARAVSQRTIQLINRASVSAGGPANLVT CVEEPTIEAATRLFSFPGI
QLL TITGGEGVVNAARKVTDKRLIAAGPGNPPVVVDETADIERAAISIVQGASFDNNIIC
VDEKEII AVESIATELKTAM-CRHGAAEI-NADQADAVARLVL--AGYPGPNPHP-----
KPEWVGRDAEKIAAAAGFS--VPA-GTRLLVTE-TE--RDHAFATTEMMLPVISLIRARD
ADQAIDWAVELEA--GNRH TAAMHSRNI---DNL SRMGLEINCSL FVKNGPCLAG-LGAG
GE----GWTSM TISTPTGEGVT-----NASTFVRKR RCT-----

```

-----MVDSFRIV-----

>gi++|32472043|ref|NP\_865037.1| ethanolamine utilization protein Eute  
[Rhodopirellula baltica SH 1]

```

-----MQLDENTIRSVVAQVL-----AEVGPMPSPDPANAFE
GSH-----GIFGNAS
DAVAAARRAFEQLR-QRPMEDRKRVIDIIRKIS--IENCEELGLMEMRETGIGRPEHKIE
KLRALGELSPGT--EFLQTKAFSGDHGLAI IERA-PFGVIAAITPVTHSLPTITGNAVSM

```



SupplementalMultipleSequenceAlign.txt

WHEACDLSIALLNQ-GIGHTMSLHTEDR---EMVMKFAKK-PAARILVNTGSAQG--GTG  
AS--TGLMPSFTLGCCTWGGSSATSENVTPMHLVNIKRVA-----  
--YGLKDCT-----TLASADASFNYP  
ELNGSATVGCTTES-----  
-----  
-----TPSFNKVN-----  
---SD-----VLDQEKLMD-LVNGLLKAMKGED-----  
-----

>gi++|150391551|ref|YP\_001321600.1| acetaldehyde dehydrogenase (acetylating)  
[Alkaliphilus metalliredigens QYMF]  
-----MEDFDRDLRSIQ-----

-----EAR  
VLATKGGKIASNQIS-EYSKEQIEKIIICNMVKVA--KENAVMLAEMAVDETGFVTVKDKTY  
KNHMASVMLYEEIKDMKTIGIIDEDEQEKQVIDLAEPMGLLMGIIPSTNPTSTAIKSIIS  
IKSRNGIVFSPHPASLKCTVKAIQLMNDAAVQAGAPENIISITTPSVEATNALMKHKNI  
ALIIATGGPGMVKASYS-AGKPALGVGAGNSPAYIEKSANIPKAISNIIASKTFDHGTIC  
ASEQSIIVEESNSDEVEIEEL-KKQGAYFM-TEEETKRVCIIIF-----KDGHT----M  
NANFVGGKPPQVIGDAAGIV--IPQ-GTKLLVGE-QKGVGTGFPLSYEKLTTVIAFYKVKD  
WEEACNLSIDLLQN-GIGHTMCLHTEDR---EMVMKFAKK-PASRILVNTGGAQG--GTG  
AS--TGLFSPFTLGCCTWGGSSATSENVSPMDLINIKRVA-----  
-----  
-----YGLSDCATLASRDRT  
FNYFDVEKNLIDIPKNCEESMQNNDSTIDNDKLVKMYELVEAMKGAN-----  
-----

>gi++|28211118|ref|NP\_782062.1| acetaldehyde dehydrogenase (acetylating)  
[Clostridium tetani E88]  
-----MEKYDKDLYSIQ-----

-----QAR  
NLARLGKVAANKIA-NYTEEQIDKILRNMVVA--EENAVSLAQMAVEETGFGKVEDKTY  
KNHLAATILYDSIKDMKTIGVISEDKVNKMIIEIAEPVGLIMGIVPSTNPTSTAIKSIIA  
IKSRNAIVFSPHPAAAKCTIRAVELMRDAAIEAGAPEDIASLTNLTMEATNELMKNENV  
SLIIATGGPGMVKAAYS-SGKPAIGVGAGNSPAYIERTANVEKAIRDIISKSFDYGTIC  
ASEQSIICEECNHDAVVEEL-KKQGGYFM-TAEETEKVCKLLF-----KNGHT----M  
NAKFVGRSPQVIANAAGFT--VSE-DIKVLIGK-QNGVGNPNLSFEKLTTLVLAFTVKD  
WHEACELSIELLQN-GIGHTMSIHTQND---DIVMEFAKK-PASRILVNTGGSQG--GTG  
AS--TGLKPAFTLGCCTWGGSSVSENVTPPEHLINKRVA-----  
--YGLKDCA-----TLVQNDPTFNCI  
KTASN-----  
-----  
-----CRGVKNQFMNMSPAQIAAAAEVLNKCNDYAKNTGCSNESKE---  
-----KDANNEELLSLVNQIVAAMKGAN-----  
-----

>gi++|125717387|ref|YP\_001034520.1| aldehyde dehydrogenase [Streptococcus sanguinis  
SK36]  
-----MFLEDKDLVSIQ-----

-----EVR  
NLIRDAKKAQAELA-KMSQEQIDTIVKVVAKAC--YDERERLAKMAAQETGFGRWEDKVL  
KNALASKGILEEIKDMKTIVGVLSEDKEKKVLEVGVPVGVIAGLIPSTNPTSTVMYKALIA  
LKAGNSIVFSPHPNALKCIEETVEIIEKKAASAGCPDGAISAIHRVSIATNELMRHKDT  
NLILATGGNAMVKAAYS-SGTPAIGVGPGNGPAFIERTADVPAVRQILDSKTFDNGVIC  
ASEQSIIVEEDMKEKVVAEF-KKQGAYFV-PAEDAKKLGSFII-----QPSGAM-----  
NPKMVGKTPQVIGELAGIS--VPA-DARVLIAE-ETGVGKQYPYSMEKLAPVLGFYTVKD  
WLEACELSIKILHHEGAGHTLAIHSQNE---EIIREFALKKPVSRLLINTPAALG--GVG  
AT--TGLFPAFTLGCCTWGGSSATSDNVSPLNLFNIRVA-----  
-----



SupplementalMultipleSequenceAlign.txt

-----CHGVQNQFMNMSPAQIAAAAEEVLNKANNCAENTNTCTECSN---  
-----ENTKNEELLDLVNQIVAAMKGAN-----  
-----

>gi++|188587712|ref|YP\_001920780.1| acetaldehyde dehydrogenase (acetylating)  
[Clostridium botulinum E3 str. Alaska E43]

-----MENFDRDLCSIQ-----  
-----EAR  
NLARLGKVAEKIA-DYTEEQIDKILCNMVKVA--EANAVCLAQMAVEETGFGKVEDKTY  
KNHMASTILYDSIKDMKTIGIIEKEDEANKLIELAEPVGLVMGIVPSTNPTSTAIKFAMIA  
IKSRNAIVFSPHPSAAQCTIKAAKLMNEAAIEAGAPENIIGCVSTPTIGATNELMKSKEV  
AIIIATGGPGMVKAAYS-SGKPALGVGAGNSPAYIERSANVEKAIRNIIASKTFDNGTIC  
ASEQSIICEECNHDEVAEL-KKQGGYFM-TAEETDKVCNLLF-----KNGHS-----M  
NAKFVGRSPQVIASSAGIS--IPQ-DTKVLIGE-QKGVGEGYPLSFEKLTTLVAFYTVKD  
WHEACELSIELLQN-GIGHTMSIHTEDR---DIVMKFARK-PASRILVNTGGSQG--GTG  
AS--TGLIPSFTLGCGTWGSSVSENVTPMHLINIKRVA-----  
--YGLKDCA-----  
-----

-----TLASNDTTFNHIKTENNCHHTQN  
QCGSLSPDQYAAASKCINTDDIKNANNEELLDMINKLVKVMKGEA-----  
-----

>gi++|170759220|ref|YP\_001787498.1| acetaldehyde dehydrogenase (acetylating)  
[Clostridium botulinum A3 str. Loch Maree]

-----MENFDKDLRSIQ-----  
-----QAR  
DLARLGKVAADKIA-DYTEEQIDKILRNMVVA--EENAVCLAQMAVEETGFGKAEDKTF  
KNHLAATILYNSIKDMKTIGVINEDEENKLIELAEPVGLVMGIVPSTNPTSTAIKFAMIS  
IKSRNAIVFAPHPAAAKCTTKAVELMMDAAIEAGAPENIISAVTIPTIGATNELMKSKEV  
AIIIATGGPGMVKAAYS-SGTPAIGVGAGNSPAYIERTANVEKAVKNIIASKTFDNGTIC  
ASEQSIICEECNHDLVVAEF-KKQGGYFM-TEEETEKVCKLLF-----KKGNA-----M  
NAKFVGRSPQVIASAAGFT--IPA-GAKVLIGR-QNGVGEGYPLSFEKLTTLVGFYTVKD  
WHEACELSIKLLQN-GIGHTMSIHTEDR---DMVMKFARK-PASRILVNTGGTQG--GTG  
AS--TGLNPSFTLGCGTWGSSVSENVTPKHLINIKRVA-----  
--YGIKDCT-----NLASNDPTFNCI  
KTAEN-----  
-----

-----CHGVQNQFMNMSPAQIAAAAEEVLNKANNCAENTNTCTECSN---  
-----ENTKNEELLDLVNQIVAAMKGAN-----  
-----

>gi++|91213915|ref|YP\_543901.1| hypothetical protein UTI89\_C4967 [Escherichia coli  
UTI89]

-----MIELDTRLRSRQ-----  
-----NAR  
VLVRNAKKAQAIMA-TFSQQQIDAIVKNVAQEA--AHHAELAKMAAEETGFGNWQDKVL  
KNRFASLRVYDAIKDMKTVGIIHDDQQQKVMVGVPLGVICALVPSTNPTSTIFYKTLIA  
LKAGNAIIFSPHPGARQCSWKAIEVVKRAAEAAGAPAGIVDGVTELTLEATQELMHSKDV  
SLILATGGEGMVRAYA-SGTPPTISGGPGNGPAFIERSADIHHAVKDIITSKTFDNGVIC  
ASEQSIIVERCIYNEVHREL-EAQGAYFM-NEDEAAKMAALLL-----RPNGTI-----  
NPKVVGKTALYLSQMAGFC--VPA-STRVLIAE-QTTVSHKNPYSREKLCVPLGLYIEED  
WKAACHRVVELLTNEGLGHTLVIHTRNQ--DVIHQFCLEKPVNRILINTPAALG--GIG  
AT--TNITPALTLGCGAVGGSSSDNVGPMNLLNIRKVGYGVRSIDELRSPGSRAPQPA  
IAAPIVDPH-----  
-----

-----RSILDDAR  
FTSPAPATTSADDRFTVATTDPEGEINEQNVERVIRQVLERLGK-----  
-----

SupplementalMultipleSequenceAlign.txt

>gi++|153938065|ref|YP\_001391402.1| acetaldehyde dehydrogenase (acetylating)  
[Clostridium botulinum F str. Langeland]

-----MENFDKDLRSIQ-----  
-----QAR  
DLARLGKVAADKIA-DYTEEQIDKILRNMV RVA--EENAVCLAQMAVEETGFGIVEDKTF  
KNHLAATILYNSIKDMKTIGIIEKETNKLIEIAEPVGLVMGIVPSTNPTSTAIKFAMIS  
IKSRNAIVFAPHPAAAKCTIKAVELMRDAAIEAGAPENIISVVTIPTIGATNELMKSKEV  
AIIIATGGPGMVKAAYS-SGTPAIGVGAGNSPAYIERTANVEKAVKNIIASKTFDNGTIC  
ASEQSIICEECNHDLVVAEF-KKQGGYFM-TAEETEKVCKLLF-----KKGNA----M  
NAKFVGRSPQVIASAAGFT--IPA-GTKVLIGR-QNGVGEYPLSFEKLTTLVLFYTVKD  
WHEACELSIKLLQN-GIGHTMSIHTEDR---DMVMKFARK-PASRILVNTGGTQG--GTG  
AS--TGLNPSFTLGCCTWGGSSVSENVTPKHLINVKRVA-----  
--YGIKDC-----NLASNDPSFNCI  
KTAEN-----  
-----CHGVQNQFMNMSPAQIAAAAEEVLNKANNCSSESNCTCTECNS---  
-----ENKNEELLDLVNQIVAAMKGAN-----

>gi|50843201|ref|YP\_056428.1| putative propionaldehyde dehydrogenase / ethanolamine  
utilization protein Eute [Propionibacterium acnes KPA171202]

-----MTTAVPPTSTQLC-----  
-----GVFADVN  
AAVAAAREAF LAFS-DCSLAQRRTFINAVREAASQERLEYMATAAVEETGMGNAHHKVL  
KNLYAATRTPGV--EDLVMEARQGDDGLTTLEYS-PYGVIGAITPTTNPTETIICNTVGM  
LAAGNTVVFSPHPRARHL SAWLV DVLN RAMVEAGAPDNLITVITEPTPDTTKALINHPDI  
TMLVATGGPQIVNMVLS-SGKKAIGAGSGNPPAVVDETADA AKAASDIVQGASFDNNLPC  
TAEKEVIVVAEVL PQLMTAM-TANGAQVSDPEELAKLRSLLL-----DTSGRP-----  
NTAWVGQDAQKILRTAGIE---PHQDTRLVTMV-TD--PSDPFVQVEMLMPVVPVPTD  
YLTAIDLAVELEH--GNRHTAIMHSDKV---SRLDLMARRIQTTIFVKNGPSFAG-IGIN  
GE-----GFATFTIAGPTGEGLT-----SARSFARRRRCV-----  
-----LDAH-----

>gi|187934965|ref|YP\_001886323.1| ethanolamine utilization protein Eute [Clostridium  
botulinum B str. Eklund 17B]

-----MERNLSVLSQTNLDKIKRT-----EGDKSNNKESYL-----  
-----GVFKKVE  
NAITKAIYAQKSLSYTTKEDRERIIKSIRKAT--LENKEILAKMIVDETHMGRYEDKIL  
KHELVAKYTPGT--EDLITTAWSGDQGLTLVEMS-PYGVIGAITPSTNPTETVICNSIGM  
IAAGDSVVFNGHPGAKKCVAFVDMINKAVIREGGPENLVTTVENPTMESLNVIMKHPYI  
KLLCGTGGPGLIKTLLN-SGKKAIGAGAGNPPVIVDSDADIDKAAKNIIEGCSFDNNLPC  
IAEKEVVFENVANDLIQNM- IKNNAVLI-NENQVSKLLDLVLLERKDELEYAI-----  
NKKWVGKDAKFLDKIGIK--ASD-NVRCIICE-VD--ANHPFVMTELMMPILPIVRVKD  
VDEAIECAKTAEQ--RKRHSAYMYSKNI---DNLNRFEKEIDTTIFVKNAKSFAG-VGFG  
AE-----GFTTFTIAGPTGEGIT-----SARNFTRQRRCV-----  
-----LAG-----

>gi|150018649|ref|YP\_001310903.1| aldehyde dehydrogenase [Clostridium beijerinckii  
NCIMB 8052]

SupplementalMultipleSequenceAlign.txt

-----MNKDTLIPTTKDLK-----VKTNGENINLKNYKDNS  
SCF-----GVFENVE  
NAISSAVHAQKILSLHYTKEQREKIITEIRKAA--LQNKEVLATMILEETHMGRYEDKIL  
KHELVAKYTPGT--EDLTTTAWSGDNGLTVVEMS-PYGVIGAITPSTNPTETVICNSIGM  
IAAGNAVVFNGHPCAKKCVAFVEMINKAIISCGGPNLVTTIKNPTMESLDAIKHP  
KLLCGTGGPGMVKTLN-SGKKAIGAGAGNPPVIVDDTADIEKAGRSIIEGCSFDNNLPC  
IAEKEVVFVENVADDLISNM-LKNNAVII-NEDQVSKLIDLVL-----QKNNETQEYFI  
NKKVWGKDAKLFLDEIDVE--SPS-NVKCIICE-VN--ANHFPVMTLMMPI  
IDEAIKYAKIAEQ--NRKHSAYIYSKNI---DNLNRFEREIDTTIFVKNAKS  
FAG-VGYE  
AE-----GFTTFTIAGSTGEGIT-----SARNFTRQRRCV-----  
-----  
-----  
-----  
-----  
-----  
-----LAG-----  
-----  
-----

>gi|27366378|ref|NP\_761906.1| bifunctional acetaldehyde-CoA/alcohol dehydrogenase  
[Vibrio vulnificus CMCP6]

-----MA-----  
-----ELD  
AMIA RVKKAQE EFA-TYSQEQVD AIFRAASLAA--NQARIPLAQMAVEESGMGIVEDKVI  
KNHFASEFIYNKYKDEKTCGILEEDNLGTMTIAEPVGIICGIVPTTNPTSTAIKSLIS  
LKTRNGIIFSPHPRAKNSTNDAAKLVLEAAVAAGAPKDIIGWIDQPSVELSNALMKHDDI  
ALILATGGPGMVKAAYS-SGKPAIGVGAGNPPVVIDETADIKRAVASILMSKTFDNGVVC  
ASEQAAIVVDAVYDEVKERF-ASHKAYVL-SKAEAEKVRKVLL-----IDGAL-----  
NAKIVGQPA AAI AEMAGVK--VPA-DTKVLVGEGLGKVS YDDAFAHEKLSPTLGLFRADD  
FEDAVAQAVTMVEIGGIGHTSGLYTNQDVNADRIRYFGDKLKTARILVNIPTTHG--GIG  
DLYNFNVAPSLTLGCGSWGNSISENVGPKHLINKKTVAKRAENMLWHKLPKSIYFRRGS  
LPIALSDLE---GKKRAFLVTD RFLFNNGYADDVVQLLKAQGM EVQTFDFVEADPTLSV  
EKGAAAMQSFQPDVILALGGGSPMDAAKIMWVMYEHPEHFEELAMR FMDIRKRIYKFPK  
MGKKAELVCITTTSGTGSEVTPFAVVTD DKTGAKYPLADYELTPQMAIVDANLVMNMPKS  
LTAFFGGYDAVTHALEAYVSVLANEYSDGQALQALKMLKEYLPSSYANGAKDPIAREKVHN  
AATIAGIAFANAFLGVCHSMAHKIGAEFHLPHGLANALLISNVVRYNANDNPTKQTAFSQ  
YDRPQARRRYAEVADHLGLSQA-GDRTAQKIERLLAWLDELKGNLDIPMSIQAA-GVAEA  
DFLAKVDELAVEAFDDQCTGANPRYPLIAELKEVLLASYYGKAFVEGETFEGTTVIKKA  
DQVAPKAKK-----

>gi|37679359|ref|NP\_933968.1| bifunctional acetaldehyde-CoA/alcohol dehydrogenase  
[Vibrio vulnificus YJ016]

-----MPVTNMA-----  
-----ELD  
AMIA RVKKAQE EFA-TYSQEQVD AIFRAASLAA--NQARIPLAQMAVEESGMGIVEDKVI  
KNHFASEFIYNKYKDEKTCGILEEDNLGTMTIAEPVGIICGIVPTTNPTSTAIKSLIS  
LKTRNGIIFSPHPRAKNSTNDAAKLVLEAAVAAGAPKDIIGWIDQPSVELSNALMKHDDI  
ALILATGGPGMVKAAYS-SGKPAIGVGAGNPPVVIDETADIKRAVASILMSKTFDNGVVC  
ASEQAAIVVDAVYDEVKERF-ASHKAYVL-SKAEAEKVRKVLL-----IDGAL-----  
NAKIVGQPA AAI AEMAGVK--VPA-DTKVLVGEGLGKVS YDDAFAHEKLSPTLGLFRADD  
FEDAVAQAVTMVEIGGIGHTSGLYTNQDVNADRIRYFGDKLKTARILVNIPTTHG--GIG  
DLYNFNVAPSLTLGCGSWGNSISENVGPKHLINKKTVAKRAENMLWHKLPKSIYFRRGS  
LPIALSDLE---GKKRAFLVTD RFLFNNGYADDVVQLLKAQGM EVQTFDFVEADPTLSV  
EKGAAAMQSFQPDVILALGGGSPMDAAKIMWVMYEHPEHFEELAMR FMDIRKRIYKFPK  
MGKKAELVCITTTSGTGSEVTPFAVVTD DKTGAKYPLADYELTPQMAIVDANLVMNMPKS  
LTAFFGGYDAVTHALEAYVSVLANEYSDGQALQALKMLKEYLPSSYANGAKDPIAREKVHN  
AATIAGIAFANAFLGVCHSMAHKIGAEFHLPHGLANALLISNVVRYNANDNPTKQTAFSQ  
YDRPQARRRYAEVADHLGLSQA-GDRTAQKIERLLAWLDELKGNLDIPMSIQAA-GVAEA  
DFLAKVDELAVEAFDDQCTGANPRYPLIAELKEVLLASYYGKAFVEGETFEGTTVIKKA  
DQVAPKAKK-----

>gi|15642035|ref|NP\_231667.1| bifunctional acetaldehyde-CoA/alcohol dehydrogenase  
[Vibrio cholerae 01 biovar eltor str. N16961]

-----MPVTNLA-----  
-----ELD  
ALVARVKAQA EFA-TFSQEQVDKIFRAASLAA--NQARIPLAQMAVEESGMGIVEDKVI

SupplementalMultipleSequenceAlign.txt

KNHFASEFIYNKYKDEKTCGILEEDDNLGTMIAEPVGIICGIVPTTNPTSTAIKSLIS  
LKTRNGIIFSPHPRAKNSTNAAAKLVLDAAIAAGAPKDIIGWIDQPSVELSNALMKHDGI  
ALILATGGPGMVKAAYS-SGKPAIGVGAGNVPVVIDETADIKRAVASILMSKTFDNGVVC  
ASEQAAIIVVSEVYDEVKERF-ATHKAHVL-SKADADKVRKVLL-----IDGAL-----  
NAKIVGQPAAIAEMAGVK--VPA-DTKVLVGEGLGKVSYDDEFAHEKLSPTLGLFRADN  
FEDAVAQAVTMVEIGGIGHTSGLYTNQDVNADRIRYFGDKLKTARILVNIPTTHG--GIG  
DLYNFNVAPSLTLGCGSWGGSISENVGPKHLINKKTVAKRAENMLWHKLPKSIYFRRGS  
LPIALSDLE---GKKRAFLVTDRLFNNGYADDVVALKAQGMVEVQTFEVEADPTLSVV  
EKGAAAMQSFQPDVILALGGGSPMDAAKIMWVMEHPDTHFEELAMRFMDIRKRIYKFPK  
MGKKAELVCITTTSGTGSEVTPFAVVTDDKTGAKYPLADYELTPQMAIVDANLVMNMPKS  
LTAFFGGYDAVTHALEAYVSVLANEYSDGQALQALKMLKEYLPSSYANGAKDPIAREKVHN  
AATIAGIAFANAFLGVCHSMAHKIGAEFHLPHGLANALLIANVVRYNANDNPTKQTAFSQ  
YDRPQARRRYAEVADHLGLSQP-GDRTAQKIERLLTWLDELKVNLDIPKSIQAA-GVAEA  
DFLAKVDELAVEAFDDQCTGANPRYPLIAELKEVLLASYYGKPFVEGQTFEGTTVIVKKA  
DQEAAPKPKAKK-----

>gi|218708954|ref|YP\_002416575.1| Alcohol dehydrogenase/acetaldehyde dehydrogenase  
[Vibrio splendidus LGP32]

-----MPVTNLA-----

-----ELD  
ALVARVKAQEFA-TFSQEKVDIAIFRAASLAA--NHARIPLAQQAVAESGMGIVEDKVI  
KNHFASEFIYNKYKDEKTCGILDEDESLGTMIAEPVGIICGIVPTTNPTSTAIKSLIS  
LKTRNGIIFSPHPRAKNSTNDAAKLVLDAAVAAGAPKDIIGWIDQPSVELSNALMKHDGI  
ALILATGGPGMVKAAYS-SGKPAIGVGAGNVPVVIDETADIKRAVASILMSKTFDNGVVC  
ASEQAAIIVVSEVYDEVKERF-ASHKAHVL-SKADADKVRKVLL-----IDGNL-----  
NAKIVGQPAPAAIAEMAGVK--VPA-DTKVLVGEGLGKVSYDDEFAHEKLSPTLGLFRADD  
FEDAVAQAVTMVEIGGIGHTSGLYTNQDVNADRIRYFGDKMKTARILINIPTTHG--GIG  
DLYNFNVAPSLTLGCGSWGGSISENVGPKHLINKKTVAKRAENMLWHKLPKSIYFRRGS  
LPIAMSDLE---GKKRAFLVTDRLFNNGYADDVQILKSQGIEVQVFFDVEADPTLSVV  
EKGAEAMKSFQPDVILALGGGSPMDAAKIMWVMEHPETHFEELAMRFMDIRKRIYKFPK  
MGKKAELVCITTTSGTGSEVTPFAVVTDDKTGAKYPLADYEITPNMAVVDANLVMNMPKS  
LTAFFGGYDAVTHALEAYVSVLANEYSDGQALQALKMLKEYLPSSYKNGSADPIAREKVHN  
AATIAGIAFANAFLGVCHSMAHKIGAEFHLPHGLANALLISNVVRYNANDNPTKQTAFSQ  
YDRPQARRRYAEVADHLGLSQA-GDRTAQKIERLLTWLEELKVDLDIPLSIQAA-GVNES  
DFIAKLDELAVEAFDDQCTGANPRYPLITELKEVLTTSYFGKAYVEGETFEGTTVILKKA  
DQKPAEKAAPKAKKEKANA--

>gi|187251182|ref|YP\_001875664.1| bifunctional acetaldehyde-CoA/alcohol  
dehydrogenase [Elusimicrobium minutum Pei191]

-----MTNKEIKKGTGPVF-----TEADIAKEQA-----

-----HIE  
HVLTSVKDAQKQYA-QYTQEQVDKIFRAAAAA--ASKRIFLSKMAVEETGMGMEDKVI  
KNQFASEYIYNTYKNEQTCGLERDQAFGFARVAEPIGVIAGIIPITTNPTSTAIKSLLA  
LKTRNGIVFSPHPRAKCTIAAAKIVLEAAVAAGAPKNIIGWIEASSTKASEYLMKHDKV  
NLILATGGPGMVKAAYS-SGKPAIGVGAGNTPVVIDSTADIKMAVSSVIMSKTFDNGMIC  
ASEQSVIVEKSAIEEVKKEF-VKRGCHFV-TGKDREKLAKTIV-----QDYHL-----  
NSKIVGQSAHKIAELAGFT--VDP-KTKILIAE-AKDVNCDEPFAYEKLSPVLAFTVKD  
FYSGVELAQKLIIEFGGAGHTSVLYTDEVNT-EHISIFGEKLTGRILINMPSSQG--AIG  
DVYNFKLVPSLTLGCGSWGGSVSENIGVKHLMNIKSVAERRENMLWFRVPEKIYFKAGA  
TTLALEELK---GRKRAFIITDKTMEQLGTVKNAVKVLAEAGIQVRIFSQVDPDPDLNV  
REALLVNLFPDILIGFGGGSPMDAAKIIWLMYEHPEVKFEDIALRFMDIRKRITAFPK  
LGIKATMVAIPTTSGTGSEVTPFTVITDDASGIKYPIADYELTPKMAIIDPEYVMTMPKS  
LTAFFSGMDVVTHAVESYTSVFANNFTDGHAEALRLVFKYLRQSYNEGAKAPIAREKMHY  
AATIAGMAFANAFLGICHSMAHKIGGMHYTAHGLANAILLPYVIDYNATDNPVKQGLMPQ  
YKYPFVKGRYAKIADFLGITEGCDDTDKVMRLIEAIQKLNKDLGVPVSLQES-GIPEA  
EFLANLDALSEEAFDDQCTSGNPRYPLVSEIKDLYLKAYYGKPIKHKKN-----

>gi|28211045|ref|NP\_781989.1| bifunctional acetaldehyde-CoA/alcohol dehydrogenase  
[Clostridium tetani E88]

-----MKVENVQ-----

-----QLM  
EKIENVRKAQKEFA-NYNQKQVDEIFRSAAIAA--NEARIELAKLAVEETGMGIIEDKVI  
KNHFASEYIYNKYKDEKTCGIIERDESFGAISKVAEPRGVIAAIIPIITNPTSTTIFKALIC  
LKARNGIIFSPHPKAKKSTIAAAKIVLQAADAGAPKEIIAWIDEPSLELSQKLMHEGD-  
-MILATGGPGMVKAAYS-SGKPAIGVGAGNTPAIIIDETAHIKMAVNSIIMSKSFDNGVIC



SupplementalMultipleSequenceAlign.txt

ASEQSVLVVDEYEDVKQEF-EERGAYIL-KGDEVDKLRNIIL-----INGAV-----  
NPDIIVGQPPYKIAKLAGVE--IPQ-SSRIIIGE-VKSVEIDEPFAHEKLSVPLAMYRVKD  
FNEALDKAVTLIEDGGHTSVLYTNIVKSKDRVDKFSLTMTKTGRTIINMPASQG--AMG  
DVYNFKLQPSLTLGCGTWGGNSVSENVGVKHLINIKSVAERRENMLWFRVPEKIYFKYGC  
LAMALNELK-DMKKKRAFIVTDRVLYNLGFAEKIEKILEEIGIEFKVFFDVESDPTLKTA  
KKGAEDMKSFKPDTIIALGGGSPMDAAKIMWIMYEHDPVKFEDLTMRFMDIRKRVYKFPK  
MGEKAMMVAIPTTAGTGSEVTPFAVITDENTGIKYPLADYELTPDMAIIDAELMLNIPKE  
LTAASGIDALTHGIEAYVSVLASEYTNGLALEAIRLVFKYLPDAYNEGANNIKAREKMAH  
ASTMAGMAFANAFLGVCHSMAHKL GAMHNL SHGLSNALLINEVIKFNVDNPRKQASYPQ  
YKYPNAKWRYGRIADHLNLG---GNTDDEKVELLIKAIDELNEKVGIPKTISEA-GVPKE  
KFYATLDEMSEQAFDDQCTVANPRYPLISEIKEMYINVYEDTDKEHKTEKHKNEECK---

>gi|28898895|ref|NP\_798500.1| bifunctional acetaldehyde-CoA/alcohol dehydrogenase  
[Vibrio parahaemolyticus RIMD 2210633]

-----MPVTNMA-----  
-----ELD  
AMIARVKKAEFEFA-TYSQEQVDKIFRAASLAA--NQARIPLAQQAVEESGMGIVEDKVI  
KNHFASEFIYNKYKDEQTCGILEEDDNLGTMIAEPVGIICGIVPTTNPTSTAIKSLIS  
LKTRNGIIFSPHPRAKNSTNDAAKLVLDAAVAAGAPKDIIGWIDQPSVELSNALMKHDDI  
ALILATGGPGMVKAAYS-SGKPAIGVGAGNVPVVIDETADIKRAVASVLSKTFDNGVVC  
ASEQAVIVVDEYVDEVKERF-ASHKAHVL-SKTDADKVRKVL-----IDGAL-----  
NAKIVGQPATAIAEMAGVK--VPA-DTKVLIGEGLGKVSYDDAFAHEKLSPTLGMFRADN  
FEDAVAQAVTMVEIGGIGHTSGLYTNQDVNADRIRYFGDKMKTARILINIPTTHG--GIG  
DLYNFNVAPSLTLGCGSWGNSISENVGPKHLINKKTVAKRAENMLWHKLPKSIYFRRGS  
LPIALGDLE---GKKRAFLVTDRLFNNGYADDVVSLKKAQGMVQTFDFVEADPTLSVV  
EKGAAQMASYQPDVILALGGGSPMDAAKIMWVMEHPETHFEELAMRFMDIRKRIYKFPK  
MGKKAELVCITTTSTGTSEVTPFAVVTDDKTGAKYPLADYEITPNMAIVDANLVMNMPKS  
LTAFFGGYDAVTHALEAYVSVLANEYSDGQALQALKMLKEYLPSSYANGANDPIAREKVHN  
AATIAGVAFANAFLGVCHSMAHKLGAEFHLPHGLANALLISNVVRYNANDNPTKQTAFSQ  
YDRPQARRRYAEVADHLGLSQA-GDRTAQKIERLLAWLDELKVNLDIPMSIQAA-GVAEA  
DFVAKLDELAVEAFDDQCTGANPRYPLISELKDVLLASYYGKAFVEGETFEGTTVIKKA  
DQEAASKAPKAKKEKADA----

>gi|218440596|ref|YP\_002378925.1| iron-containing alcohol dehydrogenase [Cyanotheca  
sp. PCC 7424]

-----MKVTNLE-----  
-----ELE  
ALIQRTKAAQEIIYA-TYTQEQVDEIFKKAALAA--NAARIPLAKMAVAETGMGVIEDKVI  
KNHFASEIINNYKSDKTCGIEEDKSFQKIAEPVGLVAGIVPTTNPTATAIFKSLIT  
LKTRNGIIFSPHPRAKTCTIEAARIVLEAAIEAGAPEHLIGWIDEPSVELSQRLMQHPNI  
SLILATGGPGMVKAAYS-SGRPSLGVGAGNTPALIDDTAHIKMAVSSIILSKTFDNGMIC  
ASEQSVVLDRIYDIVKEEF-RERGAYFL-TPEEEELGKVL-----VDGHI-----  
NGEVVQSVQKLAELGGFA--VPE-NTRVLIAE-VEEIGYDEPFAYEKLSVPLGMYRATD  
FTDGLNKAQLVEFAGRGHTAVLYTSPSNK-DHIRQFEETIETARVLIINTPSSQG--AIG  
DIYNFRLDPSLTLGCGTWGGNSISENVEPRHLLNIKTVAERRENMLWFRVPPKVYFKYGA  
LPIAIRELA---GKQRAFIVTDKPLYNLGLTKGLEEVLEEIGMRYNVFYDVEPDPSLET  
NRGLGVMREFNPDVIIAIGGGSPMDAAKIMWLLYEHPEIEFEGLAMRFMDIRKRVYDLPP  
LGQKAILVAVPTTSGTGSEVTPFAVVTDRRKNIKYPLADYALTPTMAVVDPELVLQMPKS  
LTAYGGDLALTHATEAFVSVLASEFTTGLCLEAIRLIFKYLPSAYHNGAKDYKAREKVHY  
AATMAGMAFANSFLGICHSMAHQLGAVFHVPHGLANAMMISHVIRYNATDAPFKQATFSQ  
YKYPNAIWRYARIADYTLGLG---GATKEDKVDRLEIEVIEDLKRRLDVPMALKDVIHVTEA  
EFLAKVDEIADQAFDDQCTGSNPRYPLIKDLRELLIKAYYGESPVTSNGNGRQYLTLEDV  
KTDPPQPIA-----

>gi|189485598|ref|YP\_001956539.1| aldehyde-alcohol dehydrogenase [uncultured Termite  
group 1 bacterium phylotype Rs-D17]

-----MTGTKGKNVCLSERDVSAGYVI-----  
-----DSSEALN  
MLIQRVKKAEVYS-SFSQEQVDIAIFKAVSIAA--NRSRIPLAKIAVEETGMGIVEDKVI  
KNHFACEYIYNKHKDAKTCGIIISEDKPNGIKILAEPVGIAGIIPPTTNPTSTVIFKSLIS  
LKTRNAVIFSPHPKAKKSTVVAARIMLDAAVKAGAPSDIIGWIDVPSLELTNLLMTHKDI  
AIILATGGPGMVKAAYS-SGKPALGVGAGNTPAVIDETADIKMAVSSILISKTFDNGMIC  
SSEQSIIIVKDVYDEVIKEL-KFRGAYIL-NEQEKEKIAKTII-----LKGKL-----  
NPAIVGQSACKIADMSGVK--VPS-NAKVLVGE-VSEISLEEEFAQEKLSPIAVYMAEN  
FEDAIVEKAYRLVELCGAGHTSVLYTDERKQ-NRINAFAGKLRTRILINTPSSQG--AIG

SupplementalMultipleSequenceAlign.txt

DLYNFKLDPSLTLGCGSWGNAVSENVGVKHLNLYKTVAERRENMLWFRIPPKIYFKRGV  
NSALRELQ---GKKRAFIVTDRFLFNSGVIYNITKVLEEINVYQIFFDVKPDPTVSTV  
TEALLLIRNYPDVIIAFGGGSPIDAAKIIWLMYEHPEPDKNIAMRFMDIRKRICKIPE  
LGKKAQMIAIPTTSGTGSEVTPFAVITDDETHIKYPIADYVLTNPVAIIDPDFADSMPS  
LCAASGIDALTHAIEAYVSVLAANFTNSPALEAAKLIFKYL PSSYAAGKDDPVAKEKVHY  
ASTLAGMAFANAFLGLCHSVAHKLGAAFNL SHGIANALVINQVIRYNATERPGKQTVFPQ  
YKFPNAKAKYGGIADENLNG-G-GYHDDEKVDLLINAITQLKKDIQIPLSIKDT-GVLEK  
DFYDKLDELAEQAFDDQCTGANPVYPLIADIKNIFIKAYNGEV-----

>gi|115525690|ref|YP\_782601.1| bifunctional acetaldehyde-CoA/alcohol dehydrogenase  
[Rhodopseudomonas palustris BisA53]

-----MVRPLPDNQNGGFTVTL-----APS  
NSPLSN-----SALTDLD  
QLVARVKAQAQLVFA-TYSQEKVDLIFRSAALAA--SDARISLAQMATAETGMGVVEDKVI  
KNHFASEYIYNAYKDDKTCGIIIEVNDEAGIMVVAEPIGLICGIVPTTNPTSTAIKALIC  
LKTRNGIIFSPHPRAARSTNAAAKLVLDAVAAGAPADIIIGWIDTPTLQLSDALMHHPDV  
NLILATGGPAMVKAAYS-SGKPAIGVGAGNTPVVIDETADIKRAVASILMSKTFDNGVVC  
ASEQSIIVVDSVYDAVRERF-ASHGGYML-KPAELDAVRVLL-----VNGNV-----  
NVNIVGQSAARIAELAGIS--VPR-DTKLLIGE-VDSTGVAEPFAHEKLSPTLAMRYRAD  
YAQAVAAAVELVALGGIGHTSALYTDQDLQPERIADFGSRMKTARILINTPSSHG--GLG  
DLYNFSLAPSLTLGCGSWGNSISENVGPKHLINKKTVAKRAENMLWHKLPKSIYFRRGA  
TSEALKDLA---GKKRALIVTDSFLFSKGYTDDVIRLLKKNGMVEVETFYQVEADPTLTII  
KKGVEIAHAFAQPDVIVAFGGGSPMDAAKLIVVLYEHPDVQFEDLALRFMDIRKRIYKFPK  
LGIKAELVAIPTTSGTGSEVTPFAVVTDDSTGVKYPIADYELTPSMAIVDANFVMNLPKS  
LTAFFGGIDAVVHSLAAYVSIMASEFTDQALQALRLLKDHLPSAYANGAKDPVAREKVHS  
GATIAGIAFANAFLGVCHSMAHKLGAAFHIPHGLSNALLICNVIRYNANDNPTKQTAFSQ  
YDRPKSRHRYGEIAIALGLD---GVNTAARIDNLLLEWLEGLKRELDIPASIQAA-GVPEA  
AFLAKLDELAVEAFDDQCTGANPRFPLLELKAILLASYYGRPFSEEYVEDEAVATAAAA  
E-----

>gi|197335754|ref|YP\_002155681.1| aldehyde-alcohol dehydrogenase 2 [Vibrio fischeri  
MJ11]

-----MPVTNLA-----  
-----ELD  
ALVARVKAQEEFA-TFSQEQVDIAIFRAASLAA--NQARIPLAQQAVAESGMGIVEDKVI  
KNHFASEFIYNKYKDEKTCGILEEDDNLGTMTIAEPVGIICGIVPTTNPTSTAIKSLIS  
LKTRNGIIFSPHPRAKNSTNDAAKLVLDAVAAGAPKDIIGWIDQPSVELSNALMKHDGI  
ALILATGGPGMVKAAYS-SGKPAIGVGAGNTPVVIDTADV KRAVASVLSKTFDNGVVC  
ASEQAVIVMDEVYDEVKERF-ASHKGYVL-SKAEADKVRKVL-----IDGNL-----  
NANIVGQVATAIAEMAGVK--VPA-DTKILVGEIGEVSYDDEFAHEKLSPTLGMFRASS  
FENAVDQAVKMVEIGGIGHTSGLYTNQDVNADRIRYFGDKLKTARILVNIPTTHG--GIG  
DLYNFNVAPSLTLGCGSWGNSISENVGPKHLINKKTVAKRAENMLWHKLPKSIYFRRGS  
LPIAMSDLE---GKKRAFLVTDRLFNNGYADDVVQLLKAQGIQEVQTFDFVEADPTLSV  
EKGAEAMKSFQPDVILALGGGSPMDAAKIMWVMYEHPEHFAELAMRFMDIRKRIYKFPK  
MGKKAELVCITTTSGTGSEVTPFAVVTDDKTGAKYPLADYEITPNMAIVDANLVMNMPKS  
LTAFFGGYDAVTHALEAYVSVLANEYSDGQALQALKMLKEYLPSSYKNGANDPIAREKVHN  
AATIAGIAFANAFLGVCHSMAHKIGAEFHLPHGLANALLISNVVRYNANDNPTKQTAFSQ  
YDRPQARRRYAEVADHLGLSQA-GDRTAQKIERLLTWLEELKKDLDIPLSIKDA-GVNEA  
DFIAKLDELVSVEAFDDQCTGANPRYPLITELKEVLTTSSYYGKPFVEGETFEGTTVIKKTE  
EPKAKKAK-----

>gi|90425953|ref|YP\_534323.1| bifunctional acetaldehyde-CoA/alcohol dehydrogenase  
[Rhodopseudomonas palustris BisB18]

-----MTLSTPS-----  
-----DL  
KLVARVKAQAQLIFA-TYSQEQVDLIFRSAALAA--SDARISLAQMATAETGMGVVEDKVI  
KNHFASEYIYNAYKDDKTCGIIIEVNDEAGIMVVAEPIGLICGIVPTTNPTSTAIKALIC  
LKTRNGIIFSPHPRAARSTNAAAKLVLDAVAAGAPPDIIGWIEKPTLEL SNALMHHPAV  
NLILATGGPAMVKAAYS-SGKPAIGVGAGNTPVVIDETADIKRAVASILMSKTFDNGVVC  
ASEQSIIVVDEVYDAVRQRF-ATHGGYML-KPAELDAVRRVLL-----VNGNV-----  
NVDIVGQSAARIAELAGIS--VPH-DTKILIGE-VELTHTSEPFHEKLSPTLAMRYRAD  
YTQAVAAAVELVALGGIGHTSALYTDQDLQPERVADFGTKMKTARILINTPSSHG--GLG  
DLYNFSLAPSLTLGCGSWGNSISENVGPKHLINKKTVAKRAENMLWHKLPKSIYFRRGA  
TSEALKDLA---GKKRALVTDGFLFSKGYTDDVIRLLKKNGMVEVETFFQVEADPTLSII  
NKGVEIAHAFAKPDVIVAFGGGSPMDAAKLIVVLYEHPDVQFEDLALRFMDIRKRIYKFPK

SupplementalMultipleSequenceAlign.txt

LGQKAELVAIPTTSGTGSEVTPFAVVTDDASGIKYPIADYELTPSMAIVDANFVMHLPKS  
LTAFGGIDAVVHVALEAYVSIMASEFTDGGALQALKLLKENLPSAYVNGAKDPVARERVHS  
GATIAGIAFANAFLGVCHSMAHKLGAFFHIPHGLSNALLICNVIRYNANDNPTKQTAFSQ  
YDRPKSRHRYGEIAIALGLD---GVNTAARIDRLLEWLEGLKRELDIPASIREA-GVSEA  
DFLAKVDNIAVEAFDDQCTGANPRFPLVSELKTILLDSYYGRAFSEAHEEDEVVTL SVAT  
ANAAE-----

>gi|152970748|ref|YP\_001335857.1| bifunctional acetaldehyde-CoA/alcohol  
dehydrogenase [*Klebsiella pneumoniae* subsp. *pneumoniae* MGH 78578]  
-----MAVTNIA-----

-----ELN  
ALVERVKKAQREYA-SFTQEQVDKIFRAAALAA--ADARIPLAKMAVAESGMGIVEDKVI  
KNHFASEYIYNAYKDEKTCGVLSDDTFTGTTIAEPIGIIICGIVPTTNPTSTAIKSLIS  
LKTRNAIIFSPHPRAKEATNKAADIVLQAIIAAGAPKDLIGWIDQPSVELSNALMHPDI  
NLILATGGPGMVKAAYS-SGKPAIGVGAGNTPVVIDETADIKRAVASVLSKTFDNGVIC  
ASEQSVVVVDSVYDAVRERF-ASHGGYLL-QGKELKAVQDIIL-----KNGAL-----  
NAAIVGQPAAKIAELAGFT--VPA-TTKILIGE-VTNVDESEPFHEKLSPTLAM YRAKD  
FEDAVAKAEKLVAMGGIGHTSCLYTDQDNQPARVAYFGQMMKTARILINTPASQG--GIG  
DLYNFKLAPSLTLGCGSWGNSISENVGPKHLINKKTVAKRAENMLWHKLPKSIYFRRGS  
LPIALDEVI-TDGHKRALIVTDRFLFNNGYADQITSVLKAAGVETEVFFEVEADPTLTIV  
RKGADLANSEFKPDVIALGGGSPMDAAKIMWVMYEHPEHFELALRFMDIRKRIYKFPK  
MGVKAKMVAITTTSGTGSEVTPFAVVTDDATGQKYPLADYALTPDMAIVDANL VMDMPKS  
LCAFGGLDAVTHALEAYVSVLASEFSDGQALQALKLLKEYLPASYHEGSKNPVARERVHS  
AATIAGIAFANAFLGVCHSMAHKLGSQFHIPHGLANALLICNVIRYNANDNPTKQTAFSQ  
YDRPQARRRYAEIADHLGLSAP-GDRTAAKIEKLLAWLESIKAELGIPKSIREA-GVQEA  
DFLAHVDKLSEDAFDDQCTGANPRYPLISELKQILLDTYYGREFVEGEAGAKAEVAPVKA  
EKKAKKSA-----

>gi|59711525|ref|YP\_204301.1| fused acetaldehyde-CoA dehydrogenase/iron-dependent  
alcohol dehydrogenase/pyruvate-formate lyase deactivase [*Vibrio fischeri* ES114]  
-----

-----MGIVEDKVI  
KNHFASEFIYNKYKDEKTCGILEEDDNLGTMIAEPVGIICGIVPTTNPTSTAIKSLIS  
LKTRNGIIFSPHPRAKNSTNDAAKLVLDAAVAAGAPKDIIGWIDQPSVELSNALMKHDGI  
ALILATGGPGMVKAAYS-SGKPAIGVGAGNVPVVIDDADV KRAVASVLSKTFDNGVVC  
ASEQAVIVMDEVYDEVKERF-ASHKGYVL-SKAEADKVRKVL-----IDGNL-----  
NANIVGQPATAIAEMAGVK--VPA-DTKILVGEIGEVSYDDEFAHEKLSPTLGMFRASS  
FENAVDQAVKMVEIGGIGHTSGLYTNQDVNADRIRYFGDKLKTARILVNIPTTHG--GIG  
DLYNFVAPSLTLGCGSWGNSISENVGPKHLINKKTVAKRAENMLWHKLPKSIYFRRGS  
LPIAMSDLE---GKKRAFLVTDRLFNNGYADDVQLLKAQGIEVQTFDVEADPTLSV  
EKGAEAMKSFQPDVIALGGGSPMDAAKIMWVMYEHPEHFELAMRFMDIRKRIYKFPK  
MGKKAELVCITTTSGTGSEVTPFAVVTDDKTGAKYPLADYEITPNMAIVDANLVMNMPKS  
LTAFFGGYDAVTHALEAYVSVLANEYSDGQALQALKMLKEYLPSSYKNGANDPIAREKVHN  
AATIAGIAFANAFLGVCHSMAHKIGAEFHLPHGLANALLISNVVRYNANDNPTKQTAFSQ  
YDRPQARRRYAEVADHLGLSQA-GDRTAQKIERLLTWLEELKKDLDIPLSIKDA-GVNEA  
DFIAKLDELSEAFDDQCTGANPRYPLITELKEVLTTSSYYGKPFVEGETFEGTTVIKKTE  
EPKAKKAKK-----

>gi|161614933|ref|YP\_001588898.1| bifunctional acetaldehyde-CoA/alcohol  
dehydrogenase [*Salmonella enterica* subsp. *enterica* serovar Paratyphi B str. SPB7]  
MTFAAAFCCGASLFPFEVSMINSIE-----

-----ELN  
ALVARVKKAQQRQA-SFTQQQVDKIFRAAALAA--ADARIPLAKMAVAESGMGIVEDKVI  
KNHFASEYIYNKYKDEKTCGVLSDDTFTGTTIAEPIGIIICGIVPTTNPTSTAIKSLIS  
LKTRNAIIFSPHPRAKEATNKAADIVLQAIIAAGAPKDLIGWIDQPSVDLSNALMHPDI  
NLILATGGPGMVKAAYS-SGKPAIGVGAGNTPVVIDETADIKRAVASILMSKTFDNGVIC  
ASEQSVVVVDSVYDAVRERF-AKCGAVIL-NKKERKAVGGVLL-----KNGAL-----  
NAAIVGQSAATIAEIAIGIF--VPE-NSKVLIGE-VSATDASEPFHEKLSPTLAM YRAKD  
FADAVDKAEQLVAMGGIGHTSCLYTDQDNQPERVAYFGQMMKTARILINTPASQG--GIG  
DLYNFKLAPSLTLGCGSWGNSISENVGPKHLINKKTVAKRAENMLWHKLPKSIYFRRGS  
LPIALDEVI-TDGHKRALIVTDRFLFNNGYADQITSVLKAAGVETEVFFEVEADPTLSV  
RKGAEANSEFKPDVIALGGGSPMDAAKIMWVMYEHPEHFELALRFMDIRKRIYKFPK  
MGVKAKMIAVTTTSGTGSEVTPFAVVTDDATGQKYPLADYALTPDMAIVDANL VMDMPKS  
LCAFGGLDAVTHALEAYVSVLASEFSDGQALQALKLLKENLPASYHEGSKNPVARERVHS  
AATIAGIAFANAFLGVCHSMAHKLGSQFHIPHGLANALLICNVIRYNANDNPTKQTAFSQ

SupplementalMultipleSequenceAlign.txt

YDRPQARRRYAEIADHLGLSAP-GDRRTAAKIEKLLAWLESIKAELGIPKSIREA-GVQEA  
DFLAHVDKLSEDAFDDQCTGANPRYPLVSELRQLLLASFYGEAFAEQ-----

>gi|206580610|ref|YP\_002237946.1| aldehyde-alcohol dehydrogenase [*Klebsiella pneumoniae* 342]

-----MAVTNIA-----  
-----ELN  
ALVERVKKAQREYA-SFTQEQVDKIFRAAALAA--ADARIPLAKMAVAESGMGIVEDKVI  
KNHFASEYIYNAYKDEKTCGVLSEDDTFGTITIAEPIGIIICGIVPTTNPSTAIIFKSLIS  
LKTRNAIIFSPHPRAKEATNKAADIVLQAIIAAGAPKDLIGWIDQPSVELSNALMHPDI  
NLILATGGPGMVKAAYS-SGKPAIGVGAGNTPVVIDETADIKRAVASVLSKTFDNGVIC  
ASEQSVVVVDSVYDAVRERF-ASHGGYLL-QGKELKAVQDIIL-----KNGAL-----  
NAAIVGQPAAKIAELAGFT--VPA-TTKILIGE-VTNVDESEPF AHEKLSPTLAM YRAKD  
FEDA VTKAEKLVAMGGIGHTSCLYTDQDNQPARVAYFGQMMKTARILINTPASQG--GIG  
DLYNFKLAPSLTLGCGSWGNSISENVGPKHLINKKTVAKRAENMLWHKLPKSIYFRRGS  
LPIALDEVI-TDGHKRALIVTDRFLFNNGYADQITSVLKAAGVETEVFFEVEADPTLTIV  
RKGADLANSFKPDV IALGGGSPMDAAKIMWVMYEHPEHFEEALRFMDIRKRIYKFPK  
MGVKAKMVAITTTSGTGSEVTPFAVVTDDATGQKYPLADYALTPDMAIVDANLVMMPKS  
LCAFGGLDAVTHALEAYVSVLASEFSDGQALQALKLLKEYLPASYHEGSKNPVARERVHS  
AATIAGIAFANAFLGVCHSMAHKLGSQFHIPHLANALLICNVIRYNANDNPTKQTAFSQ  
YDRPQARRRYAEIADHLGLSAP-GDRRTAAKIEKLLAWLESIKAELGIPKSIREA-GVQEA  
DFLANVDKLSEDAFDDQCTGANPRYPLISELKQILLDTYYGREFVEGETAAKTDAAPVKA  
EKKAKKSA-----

>gi|158333640|ref|YP\_001514812.1| bifunctional acetaldehyde-CoA/alcohol  
dehydrogenase [*Acaryochloris marina* MBIC11017]

-----MMTTQTQPQVTDIP-----  
-----SLE  
DLIARVKQAQEVYA-TYTQEQVDHIFKQVAIAA--NAERIPLAKQAVAETGMGVIEDKVI  
KNHFASEYIYNKYKHEKTCGVVSADAHYGIQKVAEPLGIVAGIIPPTTNPSTAIIFKALLC  
LKTRNAIIFSPHPRAKHCTVRAVEIIRDAALQAGAPPDIVGWIDEPTLDLSQALMQHADI  
KLILATGGPGMVKAAYS-SGHPSLGVGAGNTPAVIDETADIQVAVSSILLSKTFDNGMIC  
ASEQSVVVTEAVYEQVKQEF-RKRGAYFL-TSEKDKVAQTIL-----KNGKL-----  
NPAIVGQPISELATLAGIE--GPQ-DHKVLIGE-VSTIGSSEPFAYEKLSPILAMYRAAD  
FTDAVDQAKQLVNFVGGGRGHTSVLYTAASNC-DRIRIFETELATARVLINTPSSQG--AIG  
DLYNFKLDPSLTLGCGTWGNSISGNVNVQHLLNIKTVTERRENMLWFRVPPKIYFKYGC  
IPVALRDLA---EKKRAFIITDRPLFDLGLTKEITETLDQLGIEHHLFFDVEPDPDLSTV  
KRGLDVINTFQPDV IALGGGSPMDAAKVMWLMYEHPEVEFDGLAMRFMDIRKRVYELPP  
LGNKAILVAVPTTSGTGSEVTPFAVVTDDRVGKIYPLADYALTPDMAIVDPELVLNMPKK  
LTAYGGVDALTHALEAYVSVLATEFTDGLALEAISLLMTYLPRAYHQGSADPEAREKVHY  
AATIAGLAFANAFLGICHSLAHLKLGSTFHVPHGLANALMISHVIRYNATDAPFKQAI FPQ  
YEYPQAKGRYAAIADSLNLR---GTTADEKVERLITAIENLKQELDIPSSSIREVLSVDEQ  
TFFEHLDMSEQAFDDQCTGANPRYPLIRDLKALYLEAYQNSSQATTLATEIALEAAAHN  
QALLGKNINFTSIENS-----

>gi|50121254|ref|YP\_050421.1| bifunctional acetaldehyde-CoA/alcohol dehydrogenase  
[*Pectobacterium atrosepticum* SCRI1043]

-----MAVTNVA-----  
-----ELN  
ALVERVKKAAQEFYA-TYTQEQVDKIFRAAALAA--SDARIPLAKMAVAESGMGIVEDKVI  
KNHFASEYIYNAYQDEKTCGVLSTDDTFGTITIAEPIGLICGIVPTTNPSTAIIFKALIS  
LKTRNGIIFSPHPRAKNATNKAADIVLQAIIAAGAPKDIIGWIDQPSVDLSNQLMHPDI  
NLILATGGPGMVKAAYS-SGKPAIGVGAGNTPVVIDETADIKRAVASILMSKTFDNGVIC  
ASEQSVIVVDSAYDAVRERF-ATHGGYML-KGKELHAVQGILL-----KNGSL-----  
NADIVGQPAPKIAEMAGIT--VPA-NTKVLIGE-VTAVDESEPF AHEKLSPTLAM YRAKD  
FNDAV IKA EKL VAMGGIGHTSCLYTDQDNQPERVNHFGNMMKTARILINTPASQG--GIG  
DLYNFKLAPSLTLGCGSWGNSISENVGPKHLINKKTVAKRAENMLWHKLPKSIYFRRGS  
LPIALEEVA-SDGAKRAFIVTDRFLFNNGYVDQVTSVLKQHGLETEVFFEVEADPTLSIV  
RKGAEQMHSFKPDV IALGGGSPMDAAKIMWVMYEHPTTHFEELALRFMDIRKRIYKFPK  
MGVKAKMVAITTTSGTGSEVTPFAVVTDDATGQKYPLADYALTPDMAIVDANLVMMPKS  
LCAFGGLDAVTHSLEAYVSVLANEYSDGQALQALKLLKENLPDSYRDGAKNPVARERVHN  
AATIAGIAFANAFLGVCHSMAHKLGSFHIHPLANAMLSNVIRYNANDNPTKQTTF SQ  
YDRPQARRRYAEIADHLRLTAP-SDRTAQKIEKLLNWLEEIKTELGPASIREA-GVQEA  
DFLAKVDKLSEDAFDDQCTGANPRYPLISELKQILLDTYYGRKFSEEVKTETVEPVAKAA  
KTGKKAH-----

SupplementalMultipleSequenceAlign.txt

>gi|218699946|ref|YP\_002407575.1| fused acetaldehyde-CoA dehydrogenase ; iron-dependent alcohol dehydrogenase ; pyruvate-formate lyase deactivase [Escherichia coli IAI39]

-----MAVTNVA-----  
-----ELN  
ALVERVKKQAQREYA-SFTQEQVDKIFRAAALAA--ADARIPLAKMAVAESGMGIVEDKVI  
KNHFASEYIYNAYKDEKTCGVLSDDTFGTITIAEPIGIIICGIVPTTNPTSTAIKFSLIS  
LKTRNIIIFSPHPRAKDATNKAADIVLQAATAAGAPKDLIGWIDQPSVELSNALMHPDI  
NLILATGGPGMVKAAYS-SGKPAIGVGAGNTPVVIDETADIKRAVASVLSKTFDNGVIC  
ASEQSVVVVDSVYDAVRERF-ATHGGYLL-QGKELKAVQDVIL-----KNGAL-----  
NAAIVGQPAYKIAELAGFS--VPE-NTKILIGE-VTVVDESEPFHEKLSPTLAMYRAKD  
FEDAWEKAIEKLVAMGGIGHTSCLYTDQDNQPARVSYFGQKMKKTARILINTPASQG--GIG  
DLYNFKLAPSLTLGCGSWGNSISENVGPKHLINKKTVAKRAENMLWHKLPKSIYFRRGS  
LPIALDEVI-TDGHKRALIVTDRFLFNNGYADQITSVLKAAGVETEVFFEVEADPTLSIV  
RKGAELANSFKPDVIALGGGSPMDAAKIMWVMEHPETHFEELALRFMDIRKRIYKFPK  
MGVKAKMIAVTTTTSGTGSEVTPFAVVTDDATGQKYPLADYALTPDMAIVDANLVMMPKS  
LCAFGGLDAVTHAMEAYVSVLASEFSDGQALQALKLLKEYLPASYHEGSKNPVARERVHS  
AATIAGIAFANAFLGVCHSMAHKLGSQFHIPHLANALLICNVIRYNANDNPTKQTAFSQ  
YDRPQARRRYAEIADHLGLSAP-GDRRTAAKIEKLLAWLETLKAELGIPKSIRESA-GVQEA  
DFLANVDKLSSEDAFDDQCTGANPRYPLISELKQILLDTYYGRDYVEGETAAKKEAAPAKV  
EKKAKKSA-----

>gi|215486475|ref|YP\_002328906.1| fused acetaldehyde-CoA dehydrogenase/iron-dependent alcohol dehydrogenase/pyruvate-formate lyase deactivase [Escherichia coli O127:H6 str. E2348/69]

-----MAVTNVA-----  
-----ELN  
ALVERVKKQAQREYA-SFTQEQVDKIFRAAALAA--ADARIPLAKMAVAESGMGIVEDKVI  
KNHFASEYIYNAYKDEKTCGVLSDDTFGTITIAEPIGIIICGIVPTTNPTSTAIKFSLIS  
LKTRNIIIFSPHPRAKDATNKAADIVLQAATAAGAPKDLIGWIDQPSVELSNALMHPDI  
NLILATGGPGMVKAAYS-SGKPAIGVGAGNTPVVIDETADIKRAVASVLSKTFDNGVIC  
ASEQSVVVVDSVYDAVRERF-ATHGGYLL-QGKELKAVQDVIL-----KNGAL-----  
NAAIVGQPAYKIAELAGFS--VPE-NTKILIGE-VTVVDESEPFHEKLSPTLAMYRAKD  
FEDAWEKAIEKLVAMGGIGHTSCLYTDQDNQPARVSYFGQKMKKTARILINTPASQG--GIG  
DLYNFKLAPSLTLGCGSWGNSISENVGPKHLINKKTVAKRAENMLWHKLPKSIYFRRGS  
LPIALDEVI-TDGHKRALIVTDRFLFNNGYADQITSVLKAAGVETEVFFEVEADPTLSIV  
RKGAELANSFKPDVIALGGGSPMDAAKIMWVMEHPETHFEELALRFMDIRKRIYKFPK  
MGVKAKMIAVTTTTSGTGSEVTPFAVVTDDTTGQKYPLADYALTPDMAIVDANLVMMPKS  
LCAFGGLDAVTHAMEAYVSVLASEFSDGQALQALKLLKEYLPVSYHEGSKNPVARERVHS  
AATIAGIAFANAFLGVCHSMAHKLGSQFHIPHLANALLICNVIRYNANDNPTKQTAFSQ  
YDRPQARRRYAEIADHLGLSAP-GDRRTAAKIEKLLAWLETLKAELGIPKSIRESA-GVQEA  
DFLANVDKLSSEDAFDDQCTGANPRYPLISELKQILLDTYYGRDYVEGETAAKKEAAPAKA  
EKKAKKSA-----

>gi|157370944|ref|YP\_001478933.1| bifunctional acetaldehyde-CoA/alcohol dehydrogenase [Serratia proteamaculans 568]

-----MAVTNVA-----  
-----ELN  
ELVARVKKQAQREYA-NFTQEQVDKIFRAAALAA--ADARIPLAKLAVEESGMGIVEDKVI  
KNHFASEFIYNAYKDEKTCGILAEDHTFGTITIAEPIGLICGIVPTTNPTSTAIKFALIS  
LKTRNGIIFSPHPRAKNATNKAADIVLQAATAAGAPKDIVGWIDQPTVELSNQLMHPDI  
NLILATGGPGMVKAAYS-SGKPAIGVGAGNTPVVVDETADIKRVVASILMSKTFDSGVIC  
ASEQSVIVVDSIYDAVRERF-ASHGGYML-QGKELKAVQDIIL-----KNGGL-----  
NAAIVGQSAPKIAEMAGIK--VPA-STKVLIGE-VKLVDETEPFHEKLSPTLAMYRAKD  
FADAVSKAEKLVAMGGIGHTSCLYTDQDNQPERVAFFGDKMKKTARILINTPASQG--GIG  
DLYNFKLAPSLTLGCGSWGNSISENVGPKHLINKKTVAKRAENMLWHKLPKSIYFRRGS  
LPIALEEVA-TDGAKRAFIVTDRYLFNNGYADQITSVLKSHGIETEVFFEVEADPTLSIV  
RKGAEQMNSFKPDVIALGGGSPMDAAKIMWVLYEHPETHFEDLALRFMDIRKRIYKFPK  
MGVKAKMIAVTTTTSGTGSEVTPFAVVTDDVTGQKYPLADYALTPDMAIVDANLVMNMPKS  
LCAFGGLDAVTHALEAYVSVLANEYSDGQALQALKLLKEYLPASYKEGAKNPVARERVHN  
AATIAGIAFANAFLGVCHSMAHKLGSQFHIPHLANAMLSNVIRYNANDNPTKQTAFSQ  
YDRPQARRRYGEIADHLGLSAP-GDRTAQKIEKLLTWLDEIKAELGIPASIREA-GVTEA  
DFLAKVDKLSSEDAFDDQCTGANPRYPLIAELKQIMLDTFYGRKFSEAEDEEVLVAPAAAK  
AEKSKK-----

>gi|82544308|ref|YP\_408255.1| bifunctional acetaldehyde-CoA/alcohol dehydrogenase

SupplementalMultipleSequenceAlign.txt

[Shigella boydii sb227]

-----MAVTNVA-----  
-----ELN  
ALVERVKKQAQREYA-SFTQEQVDKIFRAAALAA--ADARIPLAKMAVAESGMGIVEDKVI  
KNHFASEYIYNAYKDEKTCGILSEDDTFGTITIAEPIGIIICGIVPTTNPTSTAIKSLIS  
LKTRNAIIFSPHPRAKDATNKAADIVLQAATAAGAPKDLIGWIDQPSVELSNALMHPDI  
NLILATGGPGMVKAAYS-SGKPAIGVGAGNTPVVIDETADIKRAVASVLSKTFDNGVIC  
ASEQSVVVVDSVYDAVRERF-ATHGGYLL-QGKELKAVQDVIL-----KNGAL-----  
NAAIVGQPAYKIAELAGFS--VPE-NTKILIGE-VTVVDESEPFHEKLSPTLAMYRAKD  
FEDAVEKAEKLAMGGIGHTSCLYTDQDNQPARVSYFGQKMKKTARILINTPASQG--GIG  
DLYNFKLAPSLTLGCGSWGNSISENVGPKHLINKKTVAKRAENMLWHKLPKSIYFRRGS  
LPIALDEVI-TDGHKRALIVTDRFLFNNGYADQITSVLKAAGVETEVFFEVEADPTLSIV  
RKGAEANSFKPDVIALGGGSPMDAAKIMWVMEHPETHFEELALRFMDIRKRIYKFPK  
MGVKAKMIAVTTTTSGTGSEVTPFAVVTDDATGQKYPLADYALTPDMAIVDANLVMMPKS  
LCAFGGLDAVTHAMEAYVSVLASEFSDGQALQALKLLKEYLPASYHEGSKNPVARERVHS  
AATIAGIAFANAFLGVCHSMAHKLGSQFHIPHLANALLICNVIRYNANDNPTKQTAFSQ  
YDRPQARRRYAEIADHLGLSAP-GDRRTAAKIEKLLAWLETLKAELGIPKSIREA-GVQEA  
DFLANVDKLSSEDAFDDQCTGANPRYPLISELKQILLDTYYGRDYVEGETAAKKEAAPAKA  
EKKAKKSA-----

>gi|24112636|ref|NP\_707146.1| bifunctional acetaldehyde-CoA/alcohol dehydrogenase  
[Shigella flexneri 2a str. 301]

-----MAVTNVA-----  
-----ELN  
ALVERVKKQAQREYA-SFTQEQVDKIFRAAALAA--ADARIPLAKMAVAESGMGIVEDKVI  
KNHFASEYIYNAYKDEKTCGVLSEDDTFGTITIAEPIGIIICGIVPTTNPTSTAIKSLIS  
LKTRNAIIFSPHPRAKDATNKAADIVLQAATAAGAPKDLIGWIDQPSVELSNALMHPDI  
NLILATGGPGMVKAAYS-SGKPAIGVGAGNTPVVIDETADIKRAVASVLSKTFDNGVIC  
ASEQSVVVVDSVYDAVRERF-ATHGGYLL-QGKELKAVQDVIL-----KNGAL-----  
NAAIVGQPAYKIAELAGFS--VPE-NTKILIGE-VTVVDESEPFHEKLSPTLAMYRAKD  
FEDAVEKAEKLAMGGIGHTSCLYTDQDNQPARVSYFGQKMKKTARILINTPASQG--GIG  
DLYNFKLAPSLTLGCGSWGNSISENVGPKHLINKKTVAKRAENMLWHKLPKSIYFRRGS  
LPIALDEVI-TDGHKRALIVTDRFLFNNGYADQITSVLKAAGVETEVFFEVEADPTLSIV  
RKGAEANSFKPDVIALGGGSPMDAAKIMWVMEHPETHFEELALRFMDIRKRIYKFPK  
MGVKAKMIAVTTTTSGTGSEVTPFAVVTDDATGQKYPLADYALTPDMAIVDANLVMMPKS  
LCAFGGLDAVTHAMEAYVSVLASEFSDGQALQALKLLKEYLPASYHEGSKNPVARERVHS  
AATIAGIAFANAFLGVCHSMAHKLGSQFHIPHLANALLICNVIRYNANDNPTKQTAFSQ  
YDRPQARRRYAEIADHLGLSAP-GDRRTAAKIEKLLAWLETLKAELGIPKSIREA-GVQEA  
DFLANVDKLSSEDAFDDQCTGANPRYPLISELKQILLDTYYGRDYVEDETAAKKEAAPAKA  
EKKAKKSA-----

>gi|15801467|ref|NP\_287484.1| bifunctional acetaldehyde-CoA/alcohol dehydrogenase  
[Escherichia coli O157:H7 EDL933]

-----MAVTNVA-----  
-----ELN  
ALVERVKKQAQREYA-SFTQEQVDKIFRAAALAA--ADARIPLAKMAVAESGMGIVEDKVI  
KNHFASEYIYNAYKDEKTCGVLSEDDTFGTITIAEPIGIIICGIVPTTNPTSTAIKSLIS  
LKTRNAIIFSPHPRAKDATNKAADIVLQAATAAGAPKDLIGWIDQPSVELSNALMHPDI  
NLILATGGPGMVKAAYS-SGKPAIGVGAGNTPVVIDETADIKRAVASVLSKTFDNGVIC  
ASEQSVVVVDSVYDAVRERF-ATHGGYLL-QGKELKAVQDVIL-----KNGAL-----  
NAAIVGQPAYKIAELAGFS--VPE-NTKILIGE-VTVVDESEPFHEKLSPTLAMYRAKD  
FEDAVEKAEKLAMGGIGHTSCLYTDQDNQPARVSYFGQKMKKTARILINTPASQG--GIG  
DLYNFKLAPSLTLGCGSWGNSISENVGPKHLINKKTVAKRAENMLWHKLPKSIYFRRGS  
LPIALDEVI-TDGHKRALIVTDRFLFNNGYADQITSVLKAAGVETEVFFEVEADPTLSIV  
RKGAEANSFKPDVIALGGGSPMDAAKIMWVMEHPETHFEELALRFMDIRKRIYKFPK  
MGVKAKMIAVTTTTSGTGSEVTPFAVVTDDATGQKYPLADYALTPDMAIVDANLVMMPKS  
LCAFGGLDAVTHAMEAYVSVLASEFSDGQALQALKLLKEYLPASYHEGSKNPVARERVHS  
AXTIAGIAFANAFLGVCHSMAHKLGSQFHIPHLANALLICNVIRYNANDNPTKQTAFSQ  
YDRPQARRRYAEIADHLGLSAP-GDRRTAAKIEKLLAWLETLKAELGIPKSIREA-GVQEA  
DFLANVDKLSSEDAFDDQCTGANPRYPLISELKQILLDTYYGRDYVEGETAAKKEAAPAKA  
EKKAKKSA-----

>gi|91210463|ref|YP\_540449.1| bifunctional acetaldehyde-CoA/alcohol dehydrogenase  
[Escherichia coli UTI89]

-----MAVTNVA-----  
-----ELN

SupplementalMultipleSequenceAlign.txt

ALVERVKKQAQREYA-SFTQEQVDKIFRAAALAA--ADARIPLAKMAVAESGMGIVEDKVI  
KNHFASEYIYNAYKDEKTCGVLSDDTFTGTTITIAEPIGIIICGIVPTTNPTSTAIKSLIS  
LKTRNAIIFSPHPRAKDATNKAADIVLQAATAAGAPKDLIGWIDQPSVELSNALMHPDI  
NLILATGGPGMVKAAYS-SGKPAIGVGAGNTPVVIDETADIKRAVASVLSKTFDNGVIC  
ASEQSVVVVDSVYDAVRERF-ATHGGYLL-QGKELKAVQDVIL-----KNGAL-----  
NAAIVGQPAYKIAELAGFS--VPE-NTKILIGE-VTVVDESEPFHEKLSPTLAMYRAKD  
FEDAVEKAEKLVAMGGIGHTSCLYTDQDNQPARVSYFGQKMKKTARILINTPASQG--GIG  
DLYNFKLAPSLTLGCGSWGNSISENVGPKHLINKKTVAKRAENMLWHKLPKSIYFRRGS  
LPIALDEVI-TDGHKRALIVTDRFLFNNGYADQITSVLKAAGVETEVFFEVEADPTLSIV  
RKGAELANSFKPDVIALGGGSPMDAAKIMWVMEHPETHFEELALRFMDIRKRIYKFPK  
MGVKAKMIAVTTTTSGTGSEVTPFAVVTDATTGQKYPLADYALTPDMAIVDANLVMMPKS  
LCAFGGLDAVTHAMEAYVSVLASEFSDGQALQALKLLKEYLPASYHEGSKNPVARERVHS  
AATIAGIAFANAFLGVCHSMAHKLGSQFHIPHGLANALLICNVIRYNANDNPTKQTAFSQ  
YDRPQARRRYAEIADHLGLSAP-GDRRTAAKIEKLLAWLETLKAELGIPKSIREA-GVQEA  
DFLANVDKLSSEDAFDDQCTGANPRYPLISELKQILLDTYYGRDYVEGETAAKKEAAPAKA  
EKKAKKSA-----

>gi|157155679|ref|YP\_001462491.1| bifunctional acetaldehyde-CoA/alcohol  
dehydrogenase [Escherichia coli E24377A]

-----MAVTNVA-----

-----ELN

ALVERVKKQAQREYA-SFTQEQVDKIFRAAALAA--ADARIPLAKMAVAESGMGIVEDKVI  
KNHFASEYIYNAYKDEKTCGVLSDDTFTGTTITIAEPIGIIICGIVPTTNPTSTAIKSLIS  
LKTRNAIIFSPHPRAKDATNKAADIVLQAATAAGAPKDLIGWIDQPSVELSNALMHPDI  
NLILATGGPGMVKAAYS-SGKPAIGVGAGNTPVVIDETADIKRAVASVLSKTFDNGVIC  
ASEQSVVVVDSVYDAVRERF-ATHGGYLL-QGKELKAVQDVIL-----KNGAL-----  
NAAIVGQPAYKIAELAGFS--VPE-NTKILIGE-VTVVDESEPFHEKLSPTLAMYRAKD  
FEDAVEKAEKLVAMGGIGHTSCLYTDQDNQPARVSYFGQKMKKTARILINTPASQG--GIG  
DLYNFKLAPSLTLGCGSWGNSISENVGPKHLINKKTVAKRAENMLWHKLPKSIYFRRGS  
LPIALDEVI-TDGHKRALIVTDRFLFNNGYADQITSVLKAAGVETEVFFEVEADPTLSIV  
RKGAELANSFKPDVIALGGGSPMDAAKIMWVMEHPETHFEELALRFMDIRKRIYKFPK  
MGVKAKMIAVTTTTSGTGSEVTPFAVVTDATTGQKYPLADYALTPDMAIVDANLVMMPKS  
LCAFGGLDAVTHAMEAYVSVLASEFSDGQALQALKLLKEYLPASYHEGSKNPVARERVHS  
AATIAGIAFANAFLGVCHSMAHKLGSQFHIPHGLANALLICNVIRYNANDNPTKQTAFSQ  
YDRPQARRRYAEIADHLGLSAP-GDRRTAAKIEKLLAWLETLKAELGIPKSIREA-GVQEA  
DFLANVDKLSSEDAFDDQCTGANPRYPLISELKQILLDTYYGRDYVEGETAAKKEAAPAKA  
EKKAKKPLNQ-----

>gi|15830995|ref|NP\_309768.1| bifunctional acetaldehyde-CoA/alcohol dehydrogenase  
[Escherichia coli O157:H7 str. Sakai]

-----MAVTNVA-----

-----ELN

ALVERVKKQAQREYA-SFTQEQVDKIFRAAALAA--ADARIPLAKMAVAESGMGIVEDKVI  
KNHFASEYIYNAYKDEKTCGVLSDDTFTGTTITIAEPIGIIICGIVPTTNPTSTAIKSLIS  
LKTRNAIIFSPHPRAKDATNKAADIVLQAATAAGAPKDLIGWIDQPSVELSNALMHPDI  
NLILATGGPGMVKAAYS-SGKPAIGVGAGNTPVVIDETADIKRAVASVLSKTFDNGVIC  
ASEQSVVVVDSVYDAVRERF-ATHGGYLL-QGKELKAVQDVIL-----KNGAL-----  
NAAIVGQPAYKIAELAGFS--VPE-NTKILIGE-VTVVDESEPFHEKLSPTLAMYRAKD  
FEDAVEKAEKLVAMGGIGHTSCLYTDQDNQPARVSYFGQKMKKTARILINTPASQG--GIG  
DLYNFKLAPSLTLGCGSWGNSISENVGPKHLINKKTVAKRAENMLWHKLPKSIYFRRGS  
LPIALDEVI-TDGHKRALIVTDRFLFNNGYADQITSVLKAAGVETEVFFEVEADPTLSIV  
RKGAELANSFKPDVIALGGGSPMDAAKIMWVMEHPETHFEELALRFMDIRKRIYKFPK  
MGVKAKMIAVTTTTSGTGSEVTPFAVVTDATTGQKYPLADYALTPDMAIVDANLVMMPKS  
LCAFGGLDAVTHAMEAYVSVLASEFSDGQALQALKLLKEYLPASYHEGSKNPVARERVHS  
AATIAGIAFANAFLGVCHSMAHKLGSQFHIPHGLANALLICNVIRYNANDNPTKQTAFSQ  
YDRPQARRRYAEIADHLGLSAP-GDRRTAAKIEKLLAWLETLKAELGIPKSIREA-GVQEA  
DFLANVDKLSSEDAFDDQCTGANPRYPLISELKQILLDTYYGRDYVEGETAAKKEAAPAKA  
EKKAKKSA-----

>gi|24373696|ref|NP\_717739.1| bifunctional acetaldehyde-CoA/alcohol dehydrogenase  
[Shewanella oneidensis MR-1]

-----MTVTNAQ-----

-----KLD

LMVERVARAQAEYA-SFSQAQVDIAIFRAAALAA--ADARISLAKMAAAETRMGVIEDKVI  
KNHFASEYIYNKYKDEKTCGILSEDPTFTGTTITIAEPIGIIICGIVPTTNPTSTAIKALIS  
LKTRNAIIFSPHPRAKVVSTTTAAKLVLDAAIAAGAPKDIIGWIDEPSVALSNQLMTHPKV

SupplementalMultipleSequenceAlign.txt

NLILATGGPGMVKAAYS-SGKPAIGVGAGNTPVIDETADIKRAVSSILMSKTFDNGVVC  
ASEQAVIVVDSIYEQVKERF-ATHGGYLL-NAAQTEAMQQVIL-----KNGGL-----  
NADIVGQSAATIAQMAGIE--VPH-TTKVLIGE-VTDISETEAFAHEKLSPLLGMRYAAD  
FNDAVDKAETLVALGGIGHTSGLYTDQDTQTERVKSFGFRMKTARILINTPASQG--GIG  
DLYNFKLAPSLTLGCGSWGGSISENVGPSHLINKKTVAKRAENMLWHKLPSSIYFRRGS  
LPIALEELS---DKKRALIVTDPFLFNQGYCDETLKILKAQGLETEVFYEVEADPTLATV  
RQGAKVANSFKPDVIALGGGSPMDAAKIIVVMYEHDPDVFADLALRFMDIRKRIYKFPK  
MGVKATMVAIPTTSGTGSEVTPFAVVTDEQTKKYPIDYQLTPNMAIVDPNLVMDMPKS  
LTAFFGGIDAITHALEAYVSVMANEYSDGQALQALDLLCKYLPDAYQLGAASPIAREKVHN  
GATIAGIAFANAFLGICHSMHAKLGAEFHLAHGLANALLISNVIRFNATDLPTKQAAFSQ  
YDRPKALCRYAAIADHLALG---GNSDAQKVEKLEKIEQLKKTLPASIQEA-GVNEA  
DFLAKLDMLAEDAFDDQCTGANPRYPLISELKQLLLDSYYGRPFTEQ-----

>gi|26247570|ref|NP\_753610.1| bifunctional acetaldehyde-CoA/alcohol dehydrogenase  
[Escherichia coli CFT073]  
-----MAVTNVA-----

-----ELN  
ALVERVKKQAQREYA-SFTQEQVDKIFRAAALAA--ADARIPLAKMAVAESGMGIVEDKVI  
KNHFASEYIYNAYKDEKTCGVLSEDDTFTGTTIAEPIGIIICGIVPTTNPTSTAIKSLIS  
LKTRNAIIFSPHPRAKDATNKAADIVLQAAIAAGAPKDLIGWIDQPSVELSNALMHPDI  
NLILATGGPGMVKAAYS-SGKPAIGVGAGNTPVIDETADIKRAVASVLSKTFDNGVIC  
ASEQSVVVVDSVYDAVRERF-ATHGGYLL-QGKELKAVQDVIL-----KNGAL-----  
NAAIVGQPAYKIAELAGFS--VPE-NTKILIGE-VIVVDESEPFHEKLSPTLAMYRAKD  
FEDAWEKAELKLVAMGGIGHTSCLYTDQDNQPARVSYFGQKMKKTARILINTPASQG--GIG  
DLYNFKLAPSLTLGCGSWGGSISENVGPKHLINKKTVAKRAENMLWHKLPKSIYFRRGS  
LPIALDEVI-TDGHKRALIVTDRFLFNNGYADQITSVLKAAGVETEVFFEVEADPTLSIV  
RKGAEANSFKPDVIALGGGSPMDAAKIMVMYEHPEHFEELALRFMDIRKRIYKFPK  
MGVKAKMIAVTTTTSGTGSEVTPFAVVTDDTTGQKYPLADYALTPDMAIVDANLVMMPKS  
LCAFGGLDAVTHAMEAYVSVLASEFSDGQALQALKLLKEYLPASYHEGSKNPVARERVHS  
AATIAGIAFANAFLGVCHSMHAKLGSQFHIPHGLANALLICNVIRYNANDNPTKQTAFSQ  
YDRPQARRRYAEIADHLGLSAP-GDRRTAAKIEKLLAWLETLKAELGIPKSIREA-GVQEA  
DFLANVDKLSSEDAFDDQCTGANPRYPLISELKQILLDTYYGRDYVEGETAAKKEAAPAKA  
EKKAKKSA-----

>gi|15004739|ref|NP\_149199.1| bifunctional acetaldehyde-CoA/alcohol dehydrogenase  
[Clostridium acetobutylicum ATCC 824]  
-----MKVTNQQ-----

-----ELK  
QKLNELREAQKFA-TYTQEQVDKIFKQCAIAA--AKERINLAKLAVEETGIGLVEDKII  
KNHFAAEYIYNKYKNEKTCGIIIDHDSLGITKVAEPIGIVAAIVPTTNPTSTAIKSLIS  
LKTRNAIIFSPHPRAKKSTIAAAKLILDAVKAGAPKNIIGWIDEPSIELSQDLMSEADI  
--ILATGGPSMVKAAYS-SGKPAIGVGAGNTPAIIDESADIDMAVSSIIILSKTYDNGVIC  
ASEQSILVMNSIYEKVEEF-VKRGSYIL-NQNEIAKIKETMF-----KNGAI-----  
NADIVGKSAYIIAKMAGIE--VPQ-TTKILIGE-VQSVEKSELFSHEKLSPLVAMYKVKD  
FDEALKKAQRLIELGGSGHTSSLYIDSQNNKDKVKEFGLAMKTSRTFFINMPSSQG--ASG  
DLYNFAIAPSFTLGCCTWGGNSVSNVPEKHLNLIKSAERRENMLWFKVPQKIYFKYGC  
LRFALKELK-DMNKKRAFIIVTDKDLFKLGYVNKITKVLDEIDIKYSIFTDIKSDPTIDSV  
KKGAKEMLNFEPTTIISIGGGSPMDAAKVMHLLYEYPEAEIENLAINFMDIRKRICNFPK  
LGTKAISVAIPTTAGTGSEATPFAVITNDETGMKYPLTSYELTPNMAIIDTELMLNMPRK  
LTAATGIDALVHAIEAYVSMATDYTDELALRAIKMIFKYLPRAYKNGTNDIEAREKMAH  
ASNIAGMAFANAFLGVCHSMHAKLGMHHVPHGIACAVLIEEVIKYNATDCPTKQTAFPO  
YKSPNAKRKYAEIAEYLNK---GTSDEKVTALIEAISKLKIDLSIPQNISAA-GINKK  
DFYNTLDKMSSELAFFDQCTTANPRYPLISELKDIYIKSF-----

>gi|209695322|ref|YP\_002263251.1| aldehyde-alcohol dehydrogenase [Aliivibrio  
salmonicida LFI1238]  
-----MPVTNLA-----

-----ELD  
ALVARVAAAQKEFA-SFSQEQVDTI FRAASLAA--STARIELAKMAAEESGMGIMEDKVI  
KNHFASEFIYNKYKDELTCGIIIDRNDEGGTITIAEPLGIVCAIVPTTNPTSTAIKALIC  
LKTRNGCIFSPHPRAKNATNYAAKVLEAAIKAGAPKDIIGWIDQPSVELSNALMKHEHI  
NMILATGGPGMVKAAYS-SGKPAIGVGAGNTPVIDETADIKRAVSSILMSKTFDNGVIC  
ASEQAAIVVESIYDEVKARF-AYGAVIL-SKEDANKVRKVL-----IDGAL-----  
NANIVGQPAYKIAELANV--VPT-STKILIGE-GLEASWDEFAHEKLSPTLGLFKAKD



SupplementalMultipleSequenceAlign.txt

FEDAVRQAGIVLDIGGVGHTSVLYTDQDNNEERIAFYFGDKMKTARILVNTPASQG--GIG  
DLYNFELAPSLTLGCGSWGNGAISSENVGPKHLINKKIVAKRAENMLWHKLPKSIYFRRGC  
LPIAMSDLE---GKKRALIVTDRFLFNNGYIDDLRSILKEKMEVEVFHEVEADPTLAVV  
KAGAEACASYQPDVILAVGGGSPMDAAKIMWVMYEHPEPDFEDLSMRFMDIRKRIYKFPK  
MGQKAELVCITTTSTGTGSEVTPFAVVTDEKGTQKYPLADYELTPNMAVVDANLVMMPKS  
LCAFGGYDAVTHALEAYVSVLANEYSDGHALQSLKMLKEYLPSSYANGKKDPIAREKVHN  
AATIAGMSFAQSFLGVCHSMAHKLGAEFHIPHGLANALLISNTVRFNATNPTKQAAFSQ  
YDRPKARARYAEIAEHLGYR---DGNTETKVNALLNWLEELKIALDIPLSIQAA-GVNEA  
EFMAKVDKLAEDAFDDQCTGANPRYPLIKELKEVLIASYYGTAYADVMDAPEVKEVVKAK  
KAKK-----  
>gi|161503136|ref|YP\_001570248.1| bifunctional acetaldehyde-CoA/alcohol  
dehydrogenase [Salmonella enterica subsp. arizonae serovar 62:z4,z23:--]  
-----MAVTNVA-----

-----ELN  
ALVERVKKQAQREYA-SFTQEQVDKIFRAAALAA--ADARIPLAKMAVAESGMGIIEDKVI  
KNHFASEYIYNAYKDEKTCGVLSDDTFTGTTIAEPIGIIICGIVPTTNPTSTAIKSLIS  
LKTRNIIIFSPHPRAKEATNKAADIVLQAAIAAGAPKDLIGWIDQPSVELSNALMHPDI  
NLILATGGPGMVKAAYS-SGKPAIGVGAGNTPVVIDETADIKRAVASVLSKTFDNGVIC  
ASEQSVVVVDSVYDAVRERF-ASHGGYML-QGQELKAVQNVIL-----KNGAL-----  
NAAIVGQPAYKIAELAGFS--VPE-TTKILIGE-VTVVDESEPFHEKLSPTLAMYRAKD  
FEAVEKAELVAMGGIGHTSCLYTDQDNQDRVNYFGQKMKKTARILINTPASQG--GIG  
DLYNFKLAPSLTLGCGSWGNSISENVGPKHLINKKTVAKRAENMLWHKLPKSIYFRRGS  
LPIALDEVI-TDGHKRALIVTDRFLFNNGYADQITSVLKAAGVETEVFFEVEADPTLSVV  
RKGAELANSFKPDVIALGGGSPMDAAKIMWVMYEHPEHFEEALRFMDIRKRIYKFPK  
MGVKAKMIAVTTTTSTGTGSEVTPFAVVTDDATGQKYPLADYALTPDMAIVDANLVMMPKS  
LCAFGGLDAVTHALEAYVSVLASEFSDGQALQALKLLKENLPASYHEGSKNPVARERVHS  
AATIAGIAFANAFLGVCHSMAHKLGSQFHIPHGLANALLICNVIRYNANDNPTKQAFSQ  
YDRPQARRRYAEIADHLGLSAP-GDRTAAKIEKLLAWLESIKAELGIPKSIREA-GVQEA  
DFLANVDKLSSEDAFDDQCTGANPRYPLISELKQILLDTYYGRDFTEGEVAACKDVVATPK  
AEKKAKKSA-----  
>gi|123442494|ref|YP\_001006472.1| bifunctional acetaldehyde-CoA/alcohol  
dehydrogenase [Yersinia enterocolitica subsp. enterocolitica 8081]  
-----MAVTNVA-----

-----ELN  
ELVARVKKQAQREYA-NFTQEQVDKIFRAAALAA--ADARIPLAKLAVEESGMGIVEDKVI  
KNHFASEYIYNAYKDEKTCGILEEDKTFGTITIAEPIGLICGIVPTTNPTSTAIKALIS  
LKTRNGIVFSPHPRAKDATNKAADIVLQAAIAAGAPADIIIGWIDAPTVELSNQLMHPDI  
NLILATGGPGMVKAAYS-SGKPAIGVGAGNTPVVVDETADIKRVVASILMSKTFDNGVIC  
ASEQSIIIVVDSVYDAVRERF-ASHGGYLL-QGKELKAVQDIIL-----KNGGL-----  
NAAIVGQPATKIAEMAGIK--VPA-NTKILIGE-VKVVDESEPFHEKLSPTLAMYRAKS  
FEDAVEKAELVEMGGIGHTSCLYTDQDNQPARVKYFGDKMKTARILINTPASHG--GIG  
DLYNFKVAPSLTLGCGSWGNSISENVGPKHLINKKTVAKRAENMLWHKLPKSIYFRRGS  
LPIALEEVA-TDGAKRAFIIVTDRYLFNNGYADQITSVLKSHGIETEVFFEVEADPTLSIV  
RKGAEQMNSFKPDVIALGGGSPMDAAKIMWVMYEHPEHFEEALRFMDIRKRIYKFPK  
MGVKAKMIAVTTTTSTGTGSEVTPFAVVTDDATGQKYPLADYALTPDMAIVDANLVMNMPKS  
LCAFGGLDAVTHALEAYVSVLANEYSDGQALQALKLLKEFLPASYHEGAKNPVARERVHN  
AATIAGIAFANAFLGVCHSMAHKLGFSEFHIPHGLANAMLSNVIRYNANDNPTKQAFSQ  
YDRPQARRRYAEIADHLGLSAP-GDRTAQKIQLLAWLDEIKADLGPASIREA-GVQEA  
DFLAKVDKLSSEDAFDDQCTGANPRYPLISELKQILMDTYGREFSEELDREEVAVATSAP  
KAEKKAKK-----  
>gi|110802422|ref|YP\_699787.1| bifunctional acetaldehyde-CoA/alcohol dehydrogenase  
[Clostridium perfringens SM101]  
-----MKVTNVD-----

-----ELM  
LRLEKVRAAQKEFS-KFSQEQVDEIFRQAAVAA--NNERIRLAKMAVEESGMGIVEDKVI  
KNHFAAEYIYNKYKNEKTCGVIEKDESFGITKIAEPIGVVAIVPTTNPTSTAIKALIS  
LKTRNAVFFSPHPRAKNSTIEAARVLEAAVKAGAPKDIIGWIDEPSVEMSQVLMAEADI  
--ILATGGPGMVKAAYS-SGKPAIGVGAGNTPAIIIDETAHLKMAVNSILLSKTFDNGVIC  
ASEQTVLVVDKVVYDEVRKEF-ADRGAYFL-KDKEIDKVRKTIL-----INGNL-----  
NANIVGQSAWKIADMAGVK--VPK-DTKVLIGE-VESVELEEFPSHEKLSPLVGMYRVAN  
FEELVKAERLVELGGFGHTSVLYTDTMKSQDRVKKFGATMKTGRTIINMPSTQG--AIG  
DIYNFKLAPSLTLGCGSWGNSISENVGPKHLINVKLSVAERRENMLWFRVPEKVYFKYGA  
LGVALRELK-DLNKKKVFIIVTDNVLASLGYVDKITNVLEEIGVDFRVFSEVTPDPTLECA

SupplementalMultipleSequenceAlign.txt

KKGAEAMRSYQPDIIALGGGSPMDAAKIMWVMYEHPEVAFEDLAMRFMDIRKRVYFPPT  
MGQKAMMISVPTSAGTGEVTPFAVITDEESGVKYPLADYELTPDMAIIDAELMMNMPKG  
LTAASGIDALTHALEAYVSVLASEYTNGLALEAIRLIFKYLQAYAEGTTNIKAREKMAH  
ASTMAGMAFANAFLGVCHSMAHKLGEHHAHGVANGILIDHVIRFNAVDNPRKQAAFPQ  
YKYPNAKWRYTVIADYLGGLG---GKNEEEKVNNLIKAIIDLKKTGIPATIADC-GVSKE  
AFYATLEKMSEDAFFDQCTGANPRYPLISEIKQMYINAFEGKKDRV-----

>gi|110798574|ref|YP\_697219.1| bifunctional acetaldehyde-CoA/alcohol dehydrogenase  
[Clostridium perfringens ATCC 13124]  
-----MKVTNVD-----

-----ELM  
LRLEKVRAAQKEFS-KFSQEQVDEIFRQAATAA--NNERIRLAKMAVEESGMGIVEDKVI  
KNHFAAEYIYNKYKDEKTCGVIEKDESEFGITKIAEPIGVVAAIVPTTNPSTAIKFALIS  
LKTRNAVFFSPHPRAKNSTIEAARVLEAAVKAGAPKDIIGWIDEPSVEMSQVLMAEADI  
--ILATGGPGMVKAAYS-SGKPAIGVGAGNTPAIIDETAHLKMAVNSILLSKTFDNGVIC  
ASEQTVLVVDKVVYDEVRKEF-ADRGAYFL-KDKEIDKVRKTIL-----INGNL-----  
NANIVGQSAWKIADMAGVK--VPK-DTKVLIGE-VESVELEEFPSHEKLSVPLGMYRVAN  
FEEALVKAERLVELGGFGHTSVLYTDTMKSQDRVQKFGATMKTGRTIINMPSTQG--AIG  
DIYNFKLAPSLTLGCGSWGNSVSENVGPKHLMNVKSVAERRENMLWFRVPEKVFYKYGA  
LGVALLRELK-DLNKKKVFIVTDNVLASLGVYDKITSVLEEIGVDFRVFSEVTPDPTLAYA  
KKGAEAMRSYQPDIIALGGGSPMDAAKIMWVMYEHPEVAFEDLAMRFMDIRKRVYFPPT  
MGQKAMMISVPTSAGTGEVTPFAVITDEESGVKYPLADYELTPDMAIIDAELMMNMPKG  
LTAASGIDALTHALEAYVSVLASEYTNGLALEAIRLIFKYLQAYAEGTTNIKAREKMAH  
ASTMAGMAFANAFLGVCHSMAHKLGEHHAHGVANGILIDHVIRFNAVDNPRKQAAFPQ  
YKYPNAKWRYAVIADYLGGLG---GKNEEEKVNNLIKAIIDLKKTGIPATIADC-GVSKE  
SFYATLEKMSEDAFFDQCTGANPRYPLISEIKQMYINAFEGKKDRV-----

>gi|22125915|ref|NP\_669338.1| bifunctional acetaldehyde-CoA/alcohol dehydrogenase  
[Yersinia pestis KIM]  
-----MAVTNVA-----

-----ELN  
ELVARVKKQAQREYA-NFSQEQVDKIFRAAALAA--ADARIPLAKLAVTESGMGIVEDKVI  
KNHFASEYIYNAYKDEKTCGILCEDKTFGTITIAEPIGLICGIVPTTNPSTAIKFALIS  
LKTRNGIIFSPHPRAKDATNKAADIVLQAAIAAGAPADIIGWIDAPTVELSNQLMHPDI  
NLILATGGPGMVKAAYS-SGKPAIGVGAGNTPVVVDETADIKRVVASILMSKTFDNGVIC  
ASEQSIIIVDSVYDAVRERF-ASHGGYLL-QGKELKAVQDIIL-----KNGGL-----  
NAAIVGQPATKIAEMAGIK--VPS-NTKILIGE-VKVVDESEPFHEKLSPTLAMRRAKN  
FEEAVEKAELKLEMGGIGHTSCLYTDQDNQTVARVYFGDKMKTARILINTPASQG--GIG  
DLYNFKLAPSLTLGCGSWGNSISENVGPKHLINKKTVAKRAENMLWHKLPKSIYFRRGS  
LPIALEEVA-TDGAKRAFIVTDRYL FNNGYADQVTSVLKSHGIETEVFFEVEAAPTLSIV  
RKGAEQMNSFKPDVIALGGGSPMDAAKIMWVMYEHPEVAFEDLAMRFMDIRKRIYKFPK  
MGVKAKLVAITTTSGTGSEVTPFAVITDDATGQKYPLADYALTPDMAIVDANLVMNMPKS  
LCAFGGLDAVTHALEAYVSVLANEYSDGQALQALKLLKEFLPASYNAGAKNPVARERVHN  
AATIAGIAFANAFLGVCHSMAHKLGEFHIPHLANAMLSNVIRYNANDNPTKQTAFSQ  
YDRPQARRRYAEIADHLGLSAP-GDRTAQKIQKLLAWLDEIKAELGIPASIREA-GVQEA  
DFLAKVDKLSEDAFFDQCTGANPRYPLISELKQILMDTYGREYVEEFDREEVEAATAP  
KAEEKTKK-----

>gi|37526388|ref|NP\_929732.1| bifunctional acetaldehyde-CoA/alcohol dehydrogenase  
[Photobacterium luminescens subsp. laumondii TT01]  
-----MTVTHVT-----

-----ELN  
ELVARVKKQAQREFA-NFSQEQVDKIFRAAALAA--ADARIPLAKLAVAESGMGIVEDKVI  
KNHFASEYIYNAYKDEKTCGILSEDKTFGTITIAEPIGLICGIVPTTNPSTAIKFALIS  
LKTRNGIILSPHPRAKATTKAAELVLSAAVAAGAPKDIIGWIDEPSVELSNALMHHQDI  
NLILATGGPGMVKAAYS-SGKPAIGVGAGNTPVVIDESADIKRAVASILMSKTFDNGVIC  
ASEQSVIVVEIYDQVRKRF-FTHGGYLL-QGKELKAVQDIIL-----KNGSL-----  
NAEIVGQSATKIAEMAGIN--VPE-KTKILIGE-VSLTDEAEFHEKLSPLLAMYRGNS  
FEDAVEKAELKLEMGGIGHTSCLYTDQDNQAARIKYFGDKMKTARILVNTPASQG--GIG  
DLYNFKLAPSLTLGCGSWGNSISENVGPKHLINTKTVAKRAENMLWHKLPKSIYFRRGS  
LPVALEEVA-TDGAKRAFIVTDRLF FNHGADQVTDVLKSHGIETEVFFEVEADPTLSTV  
RKGAEQMHSFKPDVIALGGGSPMDAAKIMWVMYEHPEVAFEDLAMRFMDIRKRIYRFPK  
MGVKAKMVAITTTSGTGSEVTPFAVITDDATGQKYPLADYELTPNIAIVDANLVMNMPKS  
LCAFGGLDAITHALEAYVSVLANEYSDGQALQALKLLKEFLPVSYHEGATNPVARERVHN

SupplementalMultipleSequenceAlign.txt

AATIAGIAFANAFLGVCHSMAHKLGSFHIHPHLANALLICNVIRYNANDNPTKQTAFSQ  
YDRPQARRRYAEIADHLGLSAT-GDHTVTKIEKLLAWLKELKSELGIPTSIREA-GVQEA  
DFLAKIDKLSSEDAFDDQCTGANPRYPLISELKQLLLDSYYGREFTETVATEKSQ-----

>gi|18311513|ref|NP\_563447.1| bifunctional acetaldehyde-CoA/alcohol dehydrogenase  
[Clostridium perfringens str. 13]

-----MKVTNVD-----  
-----ELM  
LRLEKVRAAQKEFS-KFSQEQVDEIFRQAAVAA--NNERIRLAKMAVEESGMGIVEDKVI  
KNHFAEYIYNKYKDEKTCGVIEKDESEFGITKIAEPIGVVAAIVPTTNPTSTAIKFALIS  
LKTRNAVFFSPHPRAKNSTIEAARVVL EAAVKAGAPKDIIGWIDEPSVEMSQVLMAEADI  
--ILATGGPGMVKAAYS-SGKPAIGVGAGNTPAIIIDETAHLKMAVNSILLSKTFDNGVIC  
ASEQTVLVVDKVVYDEVRKEF-ADRGAYFL-KDKEIDKVRKTIL-----INGNL-----  
NANIVGQSAWKIADMAGVK--VPK-DTKVLIGE-VESVELEEFPSHEKLSVPLGMYRVAN  
FEEALVKAERLVELGGFGHTSVLYTDTMKSQDRVQKFGATMKTGRTIINMPSTQG--AIG  
DIYNFKLAPSLTLGCGSWGNSVSENVGPKHLMNVKSVAERRENMLWFRVPEKVYFKYGA  
LGVALRELK-DLNKKKVFIVTDNVLASLGVDKITSVLEEIGVDFRVFSEVTPDPTLACA  
KKGAEAMRSYQPDAAIALLGGGSPMDAAKIMWVMYEHPEVAFEDLAMRFMDIRKRVYFPPT  
MGQKAMMISVPTSAGTGSEVTPFAVITDEESGVKYPLADYELTPDMAIIDAELMMNMPKG  
LTAASGIDALTHALEAYVSVLASEYTNGLALEAIRLIFKYLQAYAEAGTTNIKAREKMAH  
ASTMAGMAFANAFLGVCHSMAHKLGSFHIAHGANGILIDHVIRFNAVDNPRKQAAFQ  
YKYPNAKWRYAVIADYLGGLG---GKNEEEKVNNLIKAIIDNLKKTGIPATIADC-GVSKE  
SFYATLEKMSSEDAFDDQCTGANPRYPLISEIKQMYINAFEGKKDRV-----

>gi|45441777|ref|NP\_993316.1| bifunctional acetaldehyde-CoA/alcohol dehydrogenase  
[Yersinia pestis biovar Microtus str. 91001]

-----MAVTNVA-----  
-----ELN  
ELVARVKKQAQREYA-NFSQEQVDKIFRAAALAA--ADARIPLAKLAVTESGMGIVEDKVI  
KNHFASEYIYNAYKDEKTCGILCEDKTFGTITIAEPIGLICGIVPTTNPTSTAIKFALIS  
LKTRNGIIFSPHPRAKDATNKAADIVLQAATAAGAPADIIIGWIDAPTVELSNQLMHPDI  
NLILATGGPGMVKAAYS-SGKPAIGVGAGNTPVVVDETADIKRVVASILMSKTFDNGVIC  
ASEQSIIIVVDSVYDAVRERF-ASHGGYLL-QGKELKAVQDIIL-----KNGGL-----  
NAAIVGQPATKIAEMAGIK--VPS-NTKILIGE-VKVVDESEPFHEKLSPTLAMYRAKN  
FEEAVEKAEKLVEMGGIGHTSCLYTDQDNQATARVKYFGDKMKTARILINTPASQG--GIG  
DLYNFKLAPSLTLGCGSWGNSISENVGPKHLINKKTVAKRAENMLWHKLPKSIYFRRGS  
LPIALEEVA-TDGAKRAFIVTDRYLFNNGYADQVTSVLKSHGIETEVFFEVEADPTLSIV  
RKGAEQMNSFKPDVIAALLGGGSPMDAAKIMWVMYEHPEHFEEALRFMDIRKRIYKFPK  
MGVKAKLVAITTTSGTGSEVTPFAVVTDDATGQKYPLADYALTPDMAIVDANLVMNMPKS  
LCAFGGLDAVTHALEAYVSVLANEYSDGQALQALKLLKEFLPASYNAGAKNPVARERVHN  
AATIAGIAFANAFLGVCHSMAHKLGSFHIHPHLANAMLSNVIRYNANDNPTKQTAFSQ  
YDRPQARRRYAEIADHLGLSAP-GDRTAQKIQLLAWLDEIKAELGIPASIREA-GVQEA  
DFLAKVDKLSSEDAFDDQCTGANPRYPLISELKQILMDTYGREYVEEFDREEVEAATAP  
KAEKTKK-----

>gi|218549066|ref|YP\_002382857.1| fused acetaldehyde-CoA dehydrogenase ;  
iron-dependent alcohol dehydrogenase ; pyruvate-formate lyase deactivase  
[Escherichia fergusonii ATCC 35469]

-----MAVTNVA-----  
-----ELN  
ALVERVKKQAQREYA-SFTQEQVDKIFRAAALAA--ADARIPLAKMAVAESGMGIVEDKVI  
KNHFASEYIYNAYKDEKTCGVLSEDDTFGTITIAEPIGIIICGIVPTTNPTSTAIKSLIS  
LKTRNAIIFSPHPRAKDATNKAADIVLQAATAAGAPKDLIGWIDQPSVELSNALMHPDI  
NLILATGGPGMVKAAYS-SGKPAIGVGAGNTPVVIDETADIKRAVASVLSKTFDNGVIC  
ASEQSVVVVDSVYDAVRERF-ATHGGYIL-QGKELKAVQDVIL-----KNGAL-----  
NAAIVGQPAYKIAELAGFT--VPQ-NTKILIGE-VTAVDESEPFHEKLSPTLAMYRAKD  
FEDAVEKAERLVAAMGGIGHTSCLYTDQDNQPARVTFYFGQKMKKTARILINTPASQG--GIG  
DLYNFKLAPSLTLGCGSWGNSISENVGPKHLINKKTVAKRAENMLWHKLPKSIYFRRGS  
LPIALDEVI-TDGHKRALIVTDRFLFNNGYADQITSVLKAAGVETEVFFEVEADPTLSVV  
RKGAELANSFKPDVIAALLGGGSPMDAAKIMWVMYEHPEHFEEALRFMDIRKRIYKFPK  
MGVKAKMIAVTTTSGTGSEVTPFAVVTDDATGQKYPLADYALTPDMAIVDANLVMNMPKS  
LCAFGGLDAVTHALEAYVSVLASEFSDGQALQALKLLKENLPASYNAGSKNPVARERVHS  
AATIAGIAFANAFLGVCHSMAHKLGSFHIPHLANALLICNVIRYNANDNPTKQTAFSQ  
YDRPQARRRYAEIADHLGLSAP-GDRTAQKIEKLLAWLESLKAEELGIPKSIREA-GVQEA

SupplementalMultipleSequenceAlign.txt

DFLANVDKLSSEDAFDDQCTGANPRYPLISELKQILLDTYYGRDFVEGA AVNQEAA PAKA  
EKKAKKSA-----

>gi|148378348|ref|YP\_001252889.1| bifunctional acetaldehyde-CoA/alcohol  
dehydrogenase [Clostridium botulinum A str. ATCC 3502]

-----MKITTE-----

-----ELI  
RKIEIKIEAQKIYS-TYSQDKVDKIFKAA AIAA--NKERIKLAKMAVEETGMGIVEDKVI  
KNHFASEYIYNKYKDEKTCGVIEKDEAFGLTKIAEPIGVIAAIVPTTNPTSTAI F KALIA  
LKTRNGIIFSPHPRAKKSTIMAAKIVLDAAVQAGAPKEIIGWIDEPTLELSNAVMSNS--  
NLVLATGGPGMVKAAYS-SGKPAIGVGPVPAIIHETADIKMAVSSVVLKTFDNGMIC  
ASEQSVIVMNSIYEEVKKEF-VIRGAYVL-NKEEIEKVKKIIL-----VNGNV-----  
NAKIVGQTPQKIGEMAGIQ--VPD-WAKLLVGE-VQSVELEEFPSHEKLSPLV LAMYKVKT  
YEEALTKAERLVELGGFGHTSSLYINTVKCKEEVEKFSNNMKTGRTIINMP SAQG--GIG  
DIYNFKLAPSLTLGCGSWGNSVSENVGPKHLLNIKNVAERRENMLWFRVPEKVYFKYGC  
LPIALKELK-RMNKKKAFIVTDKVLVELGVAKKATDVLDEIGINYKVFFDVAPDPTLETA  
KKGAKEMVDFNPDTIIAIGGGSAMDAAKIMWVMYEHPEVEFEDLAMRFMDIRKRVYEFPH  
MGDKAMMISVATSAGTGSEVTPFAVITDEKTVKYPLADYELTPDMAIVDADLMLNMPKG  
LTAASGIDALTHAVEAYVSMASEYTDGLCLEAIKTI FEYLPKAYKEGAQDIEAREKMAH  
ASTIAGMAFANAFLGVCHSMAHKL GSMHHVPHGIANALLINETIKFNSEDMPRKQTA FPQ  
YKYPNAKAKYANIADYLSLG---GKTPEEKVELLIK AIDKDKAEVNIPTSIEEA-GVSKD  
KFFKTLDEMSEQAFDDQCTGANPRYPLISEIKEMYTNVFSTKK-----

>gi|153940830|ref|YP\_001389712.1| bifunctional acetaldehyde-CoA/alcohol  
dehydrogenase [Clostridium botulinum F str. Langeland]

-----MKITTE-----

-----ELI  
RKIEIKIEAQKIYS-TYSQDKVDKIFKAA AIAA--NKERIKLAKMAVEETGMGIVEDKVI  
KNHFASEYIYNKYKDEKTCGVIEKDEAFGLTKIAEPIGVIAAIVPTTNPTSTAI F KALIA  
LKTRNGIIFSPHPRAKKSTIMAAKIVLDAAVQAGAPKEIIGWIDEPTLELSNAVMSNS--  
NLVLATGGPGMVKAAYS-SGKPAIGVGPVPAIIHETADIKMAVSSVVLKTFDNGMIC  
ASEQSVIVMNSIYEEVKKEF-VIRGAYVL-NKEEIEKVKKIIL-----VNGNV-----  
NAKIVGQTPQKIGEMAGIK--VPD-WAKLLVGE-VQSVELEEFPSHEKLSPLV LAMYKVKT  
YEEALTKAERLVELGGFGHTSSLYINTIKCKEEVEKFSNNMKTGRTIINMP SAQG--GIG  
DIYNFKLAPSLTLGCGSWGNSVSENVGPKHLLNIKNVAERRENMLWFRVPEKVYFKYGC  
LPIALKELK-RMNKKKAFIVTDKVLVELGVAKKATDVLDEIGINYKVFFDVAPDPTLETA  
KKGAKEMVDFNPDTIIAIGGGSAMDAAKIMWVMYEHPEVEFEDLAMRFMDIRKRVYEFPH  
MGDKAMMISVATSAGTGSEVTPFAVITDEKTVKYPLADYELTPDMAIVDADLMLNMPKG  
LTAASGIDALTHAVEAYVSMASEYTDGLCLEAIKTI FEYLPKAYKEGAQDIEAREKMAH  
ASTIAGMAFANAFLGVCHSMAHKL GSMHHVPHGIANALLINETIKFNSEDMPRKQTA FPQ  
YKYPNAKAKYANIADYLSLG---GKTPEEKVELLIK AIDKDKAEVNIPTSIEEA-GVSKD  
KFFKTLDEMSEQAFDDQCTGANPRYPLISEIKEMYTNVFSTKK-----

>gi|160875070|ref|YP\_001554386.1| bifunctional acetaldehyde-CoA/alcohol  
dehydrogenase [Shewanella baltica OS195]

-----MTVTNAQ-----

-----ELD  
LMVERVAKAQAEYA-TFSQAQVDKIFRAAALAA--ADARISLAKMAAAETRMGVVEDKVI  
KNHFASEYIYNKYKDEKTCGILSEDVTFGTITIAEPVGIICGIVPTTNPTSTAI F KALIS  
LKTRNAIIFSPHPRAKVVSTTTAAKLVLDAAIAAGAPKDIIGWIDEPSVALSNQLMTHPRI  
NLILATGGPGMVKAAYS-SGKPAIGVGAGNTPIVIDETADIKRAVSSILMSKTFDNGVVC  
ASEQAVIVVDSIYEQVKERF-ISHGGYML-SKNETAAMQQVIL-----KNGGL-----  
NADIVGQSAASIAQMAGFE--VPH-WTKVLIGE-VTDICDSEAF AHEKLSPLLGM YRAID  
FNDAMDKAEALVALGGIGHTSGLYTDQDTQTERVHAFGFRMKTARILINTPASQG--GIG  
DLYNFKLAPSLTLGCGSWGNSISENVGPSHLINKKTVAKRAENMLWHKLPASIYFRRGS  
LPIALEELS--DKKRALIITDRFLFNHGYCDETMRI LKAQGLETEIFYDVEADPTLAI V  
RQGAKVAQSFKPDVLIIFALGGSPMDAAKIIWVMYEHDPDVFADLALRFMDIRKRIYKFPK  
MGTKAMMVAIPTTSGTGSEVTPFAVVTDEITGKKYPIADYQLTPNMAIVDPNLVMDMPKS  
LTAFGGIDAVTHALEAYVSMANEYS DGQALQALDLLCKYLPDAYNLGSQSPVAREKVHN  
GATIAGIAFANAFLGICHSMAHKLGA EFHLAHLANALLINNVIRFNATDLPTKQA AFSQ  
YDRPKALCRYAAIADHLKLG---GKTDEEKVEKLL EKITHLKTIGIPASIQEA-GVNEA  
DFLAKLDELAEDAFAFDDQCTGANPRYPLINELKQLFLDSYYGRDYS DNN-----

>gi|62180314|ref|YP\_216731.1| bifunctional acetaldehyde-CoA/alcohol dehydrogenase

SupplementalMultipleSequenceAlign.txt

[Salmonella enterica subsp. enterica serovar Choleraesuis str. SC-B67]

-----MAVTNVA-----  
-----ELN  
ALVERVKKQAQREYA-SFTQEQVDKIFRAAALAA--ADARIPLAKMAVAESGMGIVEDKVI  
KNHFASEYIYNAYKDEKTCGVLSDDTFGTITIAEPIGIIICGIVPTTNPTSTAIKSLIS  
LKTRNAIIFSPHPRAKEATNKAADIVLQAATAAGAPKDLIGWIDQPSVELSNALMRHPDI  
NLILATGGPGMVKAAYS-SGKPAIGVGAGNTPVVIDETADIKRAVASVLSKTFDNGVIC  
ASEQSVVVVDSVYDAVRERF-ASHGGYML-QGQELKAVQNVIL-----KNGAL-----  
NAAIVGQPAYKIAELAGFS--VPE-TTKILIGE-VTVVDESEPFHEKLSPTLAMYRAKD  
FEEAVEKAEKLVAMGGIGHTSCLYTDQDNQPERVAYFGQMMKTARILINTPASQG--GIG  
DLYNFKLAPSLTLGCGSWGNSISENVGPKHLINKKTVAKRAENMLWHKLPKSIYFRRGS  
LPIALDEVI-TDGHKRALIVTDRFLFNNGYADQITSVLKAAGVETEVFFEVEADPTLSVV  
RKGAEANSFKPDVIALGGGSPMDAAKIMWVMYEHPEHFEEALRFMDIRKRIYKFPK  
MGVKAKMIAVTTTTSGTGSEVTPFAVVTDDATGQKYPLADYALTPDMAIVDANLVMMPKS  
LCAFGGLDAVTHALEAYVSVLASEFSDGQALQALKLLKENLPASYHEGSKNPVARERVHS  
AATIAGIAFANAFLGVCHSMAHKLGSQFHIPHLANALLICNVIRYNANDNPTKQTAFSQ  
YDRPQARRRYAEIADHLGLSAP-GDRRTAAKIEKLLAWLESIKAELGIPKSIREA-GVQEA  
DFLAHVDKLSEDAFDDQCTGANPRYPLISELKQILLDTYYGRDFTEGEVAAKKDVAAPK  
AEKKTKKSA-----

>gi|16765093|ref|NP\_460708.1| bifunctional acetaldehyde-CoA/alcohol dehydrogenase  
[Salmonella typhimurium LT2]

-----MAVTNVA-----  
-----ELN  
ALVERVKKQAQREYA-SFTQEQVDKIFRAAALAA--ADARIPLAKMAVAESGMGIVEDKVI  
KNHFASEYIYNAYKDEKTCGVLSDDTFGTITIAEPIGIIICGIVPTTNPTSTAIKSLIS  
LKTRNAIIFSPHPRAKEATNKAADIVLQAATAAGAPKDLIGWIDQPSVELSNALMHPDI  
NLILATGGPGMVKAAYS-SGKPAIGVGAGNTPVVIDETADIKRAVASVLSKTFDNGVIC  
ASEQSVVVVDSVYDAVRERF-ASHGGYML-QGQELKAVQNVIL-----KNGAL-----  
NAAIVGQPAYKIAELAGFS--VPE-TTKILIGE-VTVVDESEPFHEKLSPTLAMYRAKD  
FEEAVEKAEKLVAMGGIGHTSCLYTDQDNQPERVAYFGQMMKTARILINTPASQG--GIG  
DLYNFKLAPSLTLGCGSWGNSISENVGPKHLINKKTVAKRAENMLWHKLPKSIYFRRGS  
LPIALDEVI-TDGHKRALIVTDRFLFNNGYADQITSVLKAAGVETEVFFEVEADPTLSVV  
RKGAEANSFKPDVIALGGGSPMDAAKIMWVMYEHPEHFEEALRFMDIRKRIYKFPK  
MGVKAKMIAVTTTTSGTGSEVTPFAVVTDDATGQKYPLADYALTPDMAIVDANLVMMPKS  
LCAFGGLDAVTHALEAYVSVLASEFSDGQALQALKLLKENLPASYHEGSKNPVARERVHS  
AATIAGIAFANAFLGVCHSMAHKLGSQFHIPHLANALLICNVIRYNANDNPTKQTAFSQ  
YDRPQARRRYAEIADHLGLSAP-GDRRTAAKIEKLLAWLESIKAELGIPKSIREA-GVQEA  
DFLAHVDKLSEDAFDDQCTGANPRYPLISELKQILLDTYYGRDFTEGEVAAKKDVAAPK  
AEKKAKKSA-----

>gi|16760134|ref|NP\_455751.1| bifunctional acetaldehyde-CoA/alcohol dehydrogenase  
[Salmonella enterica subsp. enterica serovar Typhi str. CT18]

-----MAVTNVA-----  
-----ELN  
ALVERVKKQAQREYA-SFTQEQVDKIFRAAALAA--ADARIPLAKMAVAESGMGIVEDKVI  
KNHFASEYIYNAYKDEKTCGVLSDDTFGTITIAEPIGIIICGIVPTTNPTSTAIKSLIS  
LKTRNAIIFSPHPRAKEATNKAADIVLQAATAAGAPKDLIGWIDQPSVELSNALMHPDI  
NLILATGGPGMVKAAYS-SGKPAIGVGAGNTPVVIDETADIKRAVASVLSKTFDNGVIC  
ASEQSVVVVDSVYDAVRERF-ASHGGYML-QGQELKAVQNVIL-----KNGAL-----  
NAAIVGQPAYKIAELAGFS--VPE-TTKILIGE-VTVVDESEPFHEKLSPTLAMYRAKD  
FEEAVEKAEKLVAMGGIGHTSCLYTDQDNQPERVAYFGQMMKTARILINTPASQG--GIG  
DLYNFKLAPSLTLGCGSWGNSISENVGPKHLINKKTVAKRAENMLWHKLPKSIYFRRGS  
LPIALDEVI-TDGHKRALIVTDRFLFNNGYADQITSVLKAAGVETEVFFEVEADPTLSVV  
RKGAEANSFKPDVIALGGGSPMDAAKIMWVMYEHPEHFEEALRFMDIRKRIYKFPK  
MGVKAKMIAVTTTTSGTGSEVTPFAVVTDDATGQKYPLADYALTPDMAIVDANLVMMPKS  
LCAFGGLDAVTHALEAYVSVLASEFSDGQALQALKLLKENLPASYHEGSKNPVARERVHS  
AATIAGIAFANAFLGVCHSMAHKLGSQFHIPHLANALLICNVIRYNANDNPTKQTAFSQ  
YDRPQARRRYAEIADHLGLSAP-GDRRTAAKIEKLLAWLESIKAELGIPKSIREA-GVQEA  
DFLAHVDKLSEDAFDDQCTGANPRYPLISELKQILLDTYYGRDFTEGEVAAKKDVAAPK  
AEKKAKKSA-----

>gi|161613759|ref|YP\_001587724.1| bifunctional acetaldehyde-CoA/alcohol  
dehydrogenase [Salmonella enterica subsp. enterica serovar Paratyphi B str. SPB7]

-----MAVTNVA-----  
-----ELN

SupplementalMultipleSequenceAlign.txt

ALVERVKKAQREYA-SFTQEQVDKIFRAAALAA--ADARIPLAKMAVAESGMGIVEDKVI  
KNHFASEYIYNAYKDEKTCGVLSEDDTFTGTTITIAEPVGIICGIVPTTNPSTAIKSLIS  
LKTRNAIIFSPHRAKEATNKAADIVLQAAIAAGAPKDLIGWIDQPSVELSNALMHPDI  
NLILATGGPGMVKAAYS-SGKPAIGVGAGNTPVVIDETADIKRAVASVLSKTFDNGVIC  
ASEQSVVVVDSVYDAVRERF-ASHGGYML-QGQELKAVQNVIL-----KNGAL-----  
NAAIVGQPAYKIAELAGFS--VPE-TTKILIGE-VTVVDESEPFHEKLSPTLAMYRAKD  
FEEAVEKAEKLVAMGGIGHTSCLYTDQDNQPERVAYFGQMMKTARILINTPASQG--GIG  
DLYNFKLAPSLTLGCGSWGNSISENVGPKHLINKKTVAKRAENMLWHKLPKSIYFRRGS  
LPIALDEVI-TDGHKRALIVTDRFLFNNGYADQITSVLKAAGVETEVFFEVEADPTLSV  
RKGAELANSFKPDVIALGGGSPMDAAKIMWVMEHPETHFEELALRFMDIRKRIYKFPK  
MGVKAKMIAVTTTTSGTGSEVTPFAVVTDATGQKYPLADYALTPDMAIVDANLVMMPKS  
LCAFGGLDAVTHALEAYVSVLASEFSDGQALQALKLLKENLPASYHEGSKNPVAREVHS  
AATIAGIAFANAFLGVCHSMAHKLGSQFHIPHGLANALLICNVIRYNANDNPTKQTAFSQ  
YDRPQARRRYAEIADHLGLSAP-GDRRTAAKIEKLLAWLESIKAELGIPKSIREA-GVQEA  
DFLAHVDKLSEDAFDDQCTGANPRYPLISELKQILLDTYYGRDFTEGEVAAKKDVVAAPK  
AEKKAKKSA-----

>gi|218887410|ref|YP\_002436731.1| iron-containing alcohol dehydrogenase  
[Desulfovibrio vulgaris str. 'Miyazaki F']

-----MSKKPNAQGAKPATTPDA-----ISLNDISPSSIAPNSI-

-----TVD  
DIVTRVNEAQRFA-NFTQQQVDAlFHAAAAA--TAQRIHLARMAVQETGMGILEDKVI  
KNHFASEYIYNKYKDDKTCGVIRDDPAYGYREVAAPIGVIAGIIPPTTNPSTTIFKALLA  
LKTRNGIIFAPHPRAAKSTVEAARIVHEAAVAAGAPRGIIGWVEAPTDLTRQLMQHRGV  
ALILATGGPGMVHAAYS-SGKPAIGVGAGNTPVVVDASANVKMAVNSIILSKTFDNGMIC  
ASEQAVIVEDAAADAVKAEF-AARGCHFA-SPQEAELAGVVF-----TDGRL-----  
NAAIVGRSAAEIAAMAGIT--VPP-TTKILIAE-RDAIDPLDPFAHEKLSVPLGFYRAPD  
FAAAVDMAQRLVELGGAGHTSVLYTNEANR-ERIVHFQNVLTGRTLVNMPSSQG--AIG  
DVYNFELAPSLTLGCGSWGNSVSENIGVKHLMNVKTVARRENMLWFRVPPKIYFKMGA  
LRLALEDMR---DRKRAFIVTDRTMEDLGHVGVKTVAVLEKLGIFRVFSDVKPDPDLSTG  
YAALDSIRAFRPMFIALGGGSPMDAAKIMWLMYEQPDLKFEIISLRFMDIRKRVHAFPA  
LGKKAVMVAVPTTSGTGSEVTPFAVITDDATGMKYPIADYELTPDMAIVDPEFVMDMPKT  
LTAHSLDALTHAVEAFTSTYANNFSDGNAL EAVRLVFKYLRRAYNDGARDVMAREKMHY  
AGTIAGMAFANAFLGVCHSMAHKLGA AFHMPHGLANALLSHVIEYNATDTPTKQGLMPQ  
YRYPFVKGRYARIADMLGLTEGCGDDRDRKVARLVQAIEQLKADLNVPGSLREA-GIAEA  
DFLERVDLLAEQAFDDQCTGGNPRYPLIAEIRELYLKAYYGAPLASLASPPPAKAG----

>gi|188533723|ref|YP\_001907520.1| Aldehyde-alcohol dehydrogenase [Erwinia  
tasmaniensis Et1/99]

-----MTVTNVA-----

-----ELN  
ALVERVKQAQRIYA-GFTQEQVDKIFRSAALAA--ADARIPLAKMAVAESGMGIVEDKVI  
KNHFASEYIYNAYKDEKTCGILESDDTFTGTTITIAEPVGLICAIVPTTNPSTAIKALIA  
LKTRNAIIFSPHRAKDATNQA AKIVLQAAIEAGAPADIIIGWIDQPSVELSNQLMHPDI  
NLILATGGPGMVKAAYS-SGKPAIGVGAGNTPVVIDEYADIKRAVASILMSKTFDNGVIC  
ASEQSVIVVESIYDAVRERF-ATHGGYVL-QGRELQAVQDVIL-----KNGAL-----  
NAAIVGQPAKIAELAGID--VPE-RTKILIGE-VQRTDESEPFHEKLSMPLAMYRAKD  
FSDALMKAEKLVAMGGIGHTSCLYTDQDNQQRVHAFGSRMKTARILINTPASQG--GIG  
DLYNFKLAPSLTLGCGSWGNSISENVGPKHLINKKTVAKRAENMLWHKLPKSIYFRRGA  
LPIALEEVA-DEGAKRAFIVTDRFLFNQGYADQIIKVLKARGVETEVFSEVAADPTLSIV  
RQGAEKMHSAFKPDVIALGGGSPMDAAKIMWVLYEHPETHFADLALRFMDIRKRIYRFPK  
MGIKAKLVAVTTTTSGTGSEVTPFAVVTDATGQKYPLADYALTPDMAIVDANLVMMPKS  
LCAFGGMDAITHALEAYVSVLANEYSDGQALQALKLLKENLPSSYSQGAKNPLARERVHN  
AATIAGIAFANAFLGVCHSMAHKLGSFHLPHGLANALLIGNVIRYNANDNPTKQTAFSQ  
YDRPQARRRYAEIADHLHL SAT-SDRTAQKIEKLLAWLESKTELGPASIREA-GVQEA  
DFLAKLDKLTEDALDDQCTGANPRFPLISELKQVLLDSFYGRDFYENRVNPEAATLRVV  
AKKGDKNLKGLNQA-----

>gi|170761297|ref|YP\_001785682.1| aldehyde-alcohol dehydrogenase [Clostridium  
botulinum A3 str. Loch Maree]

-----MKITTE-----

-----ELI  
RKIEIKIEAQKIYS-TYSQDKVDKIFKAAAI--NKERIKLAKMAVEETGMGIVEDKVI  
KNHFASEYIYNKYKDEKTCGVIKDEAFGLTKIAEPIGVIAAIVPTTNPSTAIKALIA  
LKTRNGIIFSPHRAKSTIMAAKIVLDAAVQAGAPKEIIGWIDEPTLELSNAVMSNS--

SupplementalMultipleSequenceAlign.txt

NLVLATGGPGMVKAAYS-SGKPAIGVGPVPAIIHETADIKMAVSSVLSKTFDNGMIC  
ASEQSVIVMNSIYEEVKKEF-VIRGAYVL-NKEEIEKVKKIIL-----INGNV-----  
NAKIVGQTPQKIGEMAGVQ--VPD-WAKLLVGE-VQSVLEEPFSHEKLSPLAMYKVKT  
YEEASAKAERLVELGGFGHTSSLYINTIKCKEEVEKFSNNMKTGRTIINMPSAQG--GIG  
DIYNFKLAPSLTLGCGSWGGSVSENVGPKHLLNIKNVAERRENMLWFRVPEKVYFKYGC  
LPIALKELK-RMNKKKAFIVTDKVLVELGVAKKATDVLDEIGINYKVFVDVAPDPTLETA  
KKGAKEMVDFNPDTIIAIGGGSAMDAAKIMWVMYEHPEVEFEDLAMRFMDIRKRVYEFPH  
MGDKAMMISVATSAGTGEVTPFAVITDEKTGVKYPLADYELTPDMAIVDADLMLNMPKG  
LTAASGIDALTHAVEAYVSMASEYTDGLCLEAIKTI FEYLPKAYKEGAQDIEAREKMAH  
ASTIAGMAFANAFLGVCHSMAHKLGSMMHHPHGIANALLINETIKFNSEDMPRKQTAFPQ  
YKYPNAKAKYANIADYLSLG---GKTPEEKVELLIKAIKDKLAEVNIPTSIIEA-GVSKD  
KFFKTLDEMSEQAFDDQCTGANPRYPLISEIKQMYTNVFSTKK-----

>gi|146311950|ref|YP\_001177024.1| bifunctional acetaldehyde-CoA/alcohol  
dehydrogenase [Enterobacter sp. 638]

-----MAVTNIA-----  
-----ELN  
ALVERVKKQAQREYA-NFTQEQVDKIFRAAALAA--ADARIPLAKMAVAESGMGIVEDKVI  
KNHFASEYIYNAYKDEKTCGVLDEDHTFGTITIAEPIGIIICGIVPTTNPTSTAIFKSLIS  
LKTRNAIIFSPHPRAKDATNKAADIVLQAAIAAGAPKDLIGWIDQPSVELSNALMHPDI  
NMILATGGPGMVKAAYS-SGKPAIGVAGNTPVVVDETADIKRVVASILMSKTFDNGVIC  
ASEQSVIVVDSAYNAVRERF-ATHGGYML-QGKELKAVQDIIL-----KNGAL-----  
NAAIVGQPAAKIAELAGFT--VPS-DTKILIGE-VSVVDESEPFHEKLSPTLAMYRAKS  
FEDAVMKAEKLVEMGGIGHTSCLYTDQDNQPERVKYFGDKMKTARILINTPASQG--GIG  
DLYNFKLAPSLTLGCGSWGGSISENVGPKHLINKKTVAKRAENMLWHKLPKSIYFRRGS  
LPIALDEVI-TDGHKRALIVTDRFLFNNGYADQITSVLKAAGVETEVFFEVEADPTLTVV  
RKGAELANSFKPDVIALGGGSPMDAAKIMWVMYEHPEHFEELALRFMDIRKRIYKFPK  
MGVKAKMIAVTTTTSGTGSEVTPFAVVTDDATGQKYPLADYALTPDMAIVDANLVMMPKS  
LCAFGGLDAVTHALEAYVSVLASEFSDGQALQALKLLKENLPASYNEGSKNPVARERVHN  
AATIAGIAFANAFLGVCHSMAHKLGSQFHIPHGLANALLISNVIRYNANDNPTKQTAFSQ  
YDRPQARRRYAEIADHLGLSAP-GDRRTAAKIEKLLAWLDSIKAELGIPKSIIEA-GVQEA  
DFLAHVDKLSSEDAFDDQCTGANPRYPLISELKQILLDTFYGREFSENDTAAVKIDAPVKA  
DKKVKKNA-----

>gi|15004865|ref|NP\_149325.1| bifunctional acetaldehyde-CoA/alcohol dehydrogenase  
[Clostridium acetobutylicum ATCC 824]

-----MKVTTVK-----  
-----ELD  
EKLKVIKEAQKFS-CYSQEMVDEIFRNAAMAA--IDARIELAKAAVLETGMGLVEDKVI  
KNHFAGEYIYNKYKDEKTCGIIERNEPYGITKIAEPIGVVAAIIPVTNPTSTTIFKSLIS  
LKTRNGIIFSPHPRAKKSTILAAKTILDAAVKSGAPENIIGWIDEPSIELTQYLMQKADI  
TL--ATGGPSLVKSAYS-SGKPAIGVGPNTPVIIDESAHIKMAVSSIIILSKTYDNGVIC  
ASEQSVIVLKSIIYNKVKDEF-QERGAYII-KKNELDKVREVI-----KDGSV-----  
NPKIVGQSAYTIAAMAGIK--VPK-TTRILIGE-VTSLGEEEPFAHEKLSPLAMYEADN  
FDDALKKAVTLINLGLGHTSGIYADEIKARDKIDRFSSAMKTVRTFVNIPTSQ--ASG  
DLYNFRIPPSFTLGCWFVGGNSVSENVGPKHLLNIKTVAERRENMLWFRVPHKVYFKFGC  
LQFALKDLK-DLKKKRAFIVTSDPYNLNVVDSIIKILEHLDIDFKVFNKVGREADLKI  
KKATEEMSSFPDTIIALGGTPEMSSAKLMWVLYEHPEVKFEDLAIKFMDIRKRIYTFPK  
LGKKAMLVAITTSAGSGSEVTPFALVTDNNTGNKYMLADYEMTPNMAIVDAELMMKMPKG  
LTAYSGIDALVNSIEAYTSVYASEYTNGLALAEIRLIFKYLPEAYKNGRTNEKAREKMAH  
ASTMAGMASANAFLGLCHSMAIKLSSEHNIPSGIANALLIEEVIKFNAVDNVPKQAPCPQ  
YKYPNTIFRYARIADYIKLG---GNTDEEKVDLLINKIHELKALNIPTSIKDA-GVLEE  
NFYSSLDRISELALDDQCTGANPRFPLTSEIKEMYINCFKKQP-----

>gi|220931059|ref|YP\_002507967.1| iron-containing alcohol dehydrogenase  
[Halothermothrix orenii H 168]

-----MAKAVLEKSVDKAT-----KEKKEIRKGL-----  
-----KIEDSIN  
KLVERANEAAARKFK-DYDQEQVDRIVKMMALAA--NDKHIELAKMAHRETGMGVYEDKIT  
KNLFASEYVYNYLRDKKTAGILNKNIEENYIEVAEPIGVVAALTPVTNPTSTTIFKALIC  
MKTRNPVIFSFHPRAMKCSIEAARILKEAAIKAGAPENCISWIEEPSIEATNYLMKHPEV  
DLILATGGSGMVKAAYS-SGKPALGVGPGVPCYIEKTANIKQAVSDLILSKTFDNGMIC  
ASEQAVVVDEKIEAAEVKFM-QENGCFV-SKKESEKLARVAV-----DQERGAM-----  
NPAVVQGPARKIAKMAKIK--VPD-DTKILVAE-LKGVGENYPLSREKLSPILGWYVVKD

SupplementalMultipleSequenceAlign.txt

YREGIKRCEEITEFGGLGHSSVLHNSNDE---KVIDEFSRRLRTGRLIINSPSSQG--AIG  
DMYNF-NVPSLTLGCGSMGKNSTTDNVNVDNLINKKRVMARKERMKWVVPRIYFEYGS  
LRY-LSGVR----GERAFIITDKTMSQLGFIDKVEEHLVAGVQTRVFDSEVPDPSVETV  
LNGCQEMNEFKPDIIIALGGGSPMDAAKGMWLFYEHPETRFEDLKMKFNDIRKRVYKFP  
LGKKATFIAVPTTSGTGSEVTAFSVITDKKRNIKYPLADYELTPDIAIIDPELVLTVPQS  
VTADTGLDLVLTTHAIEAYVSMASDYTDALAIEKAIKLVFEYLPYAYKNG-NDREARKKMHN  
ASCIAGMAFTNAFLGLNHSMAHILGGKFHHPHGRANAILLPHVIRYNA-GKPSKLA  
FPQYDYPRAGERYAEIARILGLP---ASTTEEGVESLVKAITDLMRELNIPLSLEEA-GV  
NHNKFEKELEDMAIDAHNDQCTGTNPRMPLVNEIKEIYRQAYKGVSIKDKKKVRNA-----

>gi|217973538|ref|YP\_002358289.1| iron-containing alcohol dehydrogenase [Shewanella  
baltica OS223]

-----MTVTNAQ-----  
-----ELD  
LMVERVAKAQAEYA-TFSQAQVDNIFRAAALAA--ADARISLAKMAAVETRMGVVEDKVI  
KNHFASEYIYNKYKDEKTCGILSEDVTFGTITIAEPVGIICGIVPTTNPSTAIKFALIS  
LKTRNAIIFSPHPRAKVSTTTAAKLVLDAIAAGAPKDIIGWIDEPSVALSNQLMTHPKV  
NLILATGGPGMVKAAYS-SGKPAIGVGAGNTPIVIDETADIKRAVSSILMSKTFDNGVVC  
ASEQAVIVVDSIYEQVKERF-ISHGGYML-SKDETAAMQNVIL-----KNGGL-----  
NADIVGQSAASIAQMAGFE--VPH-WTKVLIGE-VTDICDSEAFHEKLSPLLGMRAID  
FNDAMDKAELVALGGIGHTSGLYTDQDTQTERVHAFGFRMKTARILINTPASQG--GIG  
DLYNFKLAPSLTLGCGSWGNSISENVGPSHLINKKTVAKRAENMLWHKLPAISIYFRRGS  
LPALAEELS---DKKRALIITDRFLFNHGYCDETMRIKKAQGLETEIFYDVEADPTLAI  
V RQGAKVAQSFKPDVIALGGGSPMDAAKIIWVMYEHDPVDFADLALRFMDIRKRIYKFPK  
MGTKAMMVAIPTTSGTGSEVTPFAVVTDEITGKKYPIADYQLTPNMAIVDPNLVMDMPKS  
LTAFFGGIDAVTHALEAYVSMANEYS DGQALQALDLLCKYLPDAYNLGSQSPVAREKVHN  
GATIAGIAFANAFLGICHSMHKLGAEFHLAHLANALLINNVIRFNATDLPTKQAQAFSQ  
YDRPKALCRYAAIADHLKLG---GKTDEEKVEKLLKITHLKTIGIPASIQEA-GVNEA  
DFLAKLDELAEDAFDDQCTGANPRYPLINELKQLFLDSYYGRDYSNNDNN-----

>gi|153000473|ref|YP\_001366154.1| bifunctional acetaldehyde-CoA/alcohol  
dehydrogenase [Shewanella baltica OS185]

-----MTVTNAQ-----  
-----ELD  
LMVERVAKAQAEYA-TFSQAQVDKIFRAAALAA--ADARISLAKMAAAETRMGVVEDKVI  
KNHFASEYIYNKYKDEKTCGILSEDVTFGTITIAEPVGIICGIVPTTNPSTAIKFALIS  
LKTRNAIIFSPHPRAKVSTTTAAKLVLDAIAAGAPKDIIGWIDEPSVALSNQLMTHPKV  
NLILATGGPGMVKAAYS-SGKPAIGVGAGNTPIVIDETADIKRAVSSILMSKTFDNGVVC  
ASEQAVIVVDSIYEQVKERF-ISHGGYML-SKDETAAMQHVIL-----KNGGL-----  
NADIVGQSAASIAQMAGFE--VPH-WTKVLIGE-VTDICDSEAFHEKLSPLLGMRAID  
FNDAMDKAELVALGGIGHTSGLYTDQDTQTERVHAFGFRMKTARILINTPASQG--GIG  
DLYNFKLAPSLTLGCGSWGNSISENVGPSHLINKKTVAKRAENMLWHKLPAISIYFRRGS  
LPALAEELS---DKKRALIITDRFLFNHGYCDETMRIKKAQGLETEIFYDVEADPTLAI  
V RQGAKVAQSFKPDVIALGGGSPMDAAKIIWVMYEHDPVDFADLALRFMDIRKRIYKFPK  
MGTKAMMVAIPTTSGTGSEVTPFAVVTDEITGKKYPIADYQLTPNMAIVDPNLVMDMPKS  
LTAFFGGIDAVTHALEAYVSMANEYS DGQALQALDLLCKYLPDAYNLGSQSPVAREKVHN  
GATIAGIAFANAFLGICHSMHKLGAEFHLAHLANALLINNVIRFNATDLPTKQAQAFSQ  
YDRPKALCRYAAIADHLKLG---GKTDEEKVEKLLKITHLKTIGIPASIQEA-GVNEA  
DFLAKLDELAEDAFDDQCTGANPRYPLINELKQLFLDSYYGRDYSNNDNN-----

>gi|34496592|ref|NP\_900807.1| bifunctional acetaldehyde-CoA/alcohol dehydrogenase  
[Chromobacterium violaceum ATCC 12472]

-----MAVSNQI-----  
-----ELD  
ALVARVKAQTAFA-QFTQEVDHIFRCAALAA--ADARIPLARMAVAETGMGMVMDKVI  
KNHFASEYIYNKYKDEKTCGVLSEDDTFGTITIAEPIGVLGIVPTTNPSTAIKFALIS  
LKTRNGIIFSPHPRARRSTCEAARLVLEAAVAAGAPQDIIGWIDEPSVALSNQLMHHPDV  
NLILATGGPGMVKAAYS-SGKPAIGVGAGNTPAVIDETADIKRAVASILMSKTFDNGVVC  
ASEQSVIIIVDEIYDAVRERF-SKHGGYIL-KGSEAEAVRKVIL-----QDGS-----  
NAAIVGQSAAKIAAMAGIE--VPP-TTKVLIGE-VTEVSEKEAFAHEKLSPTLAMRAKD  
FLDACDKAAALVTMGGIGHTSALYTDQDLQEERVRYFGDKMKTARILINTPSSQG--GIG  
DLYNFSLAPSLTLGCGSWGNSISENVGPKHLINKKTVAKRAENMLWHKLPKSIYFRRGC  
LPVALEDLA---GKKRCLIVTGQYL FENGFVDEPIRLKMKGLEVETFFVVPADPTLAVV



SupplementalMultipleSequenceAlign.txt

RKGAELAHAFKPDVIMAIGGGSPMDAAKIMWVMEYHPEVHFADLALRFMDIRKRIYQFPK  
LGQKAMMVAVPTTSGTGSEVTPFAVVTDEVTGVKYPIADYELTPNMAIVDANLVMSPKPS  
LTAFFGIDAVTHALEAYVSVMANEYSDPQALQALKLLKEYLPSSYLNANDPKAREQVHN  
AATIAGVAFANAFLGVCHSMAHKIGAEFGLAHGLANALLISNVIRYNAADVPTKQTAFSQ  
YDRPKSVARYAEIARHLGLE---ASRDHQRVEKLEIWDDELKKTGLGIPASIQAA-GVAES  
DFLAKVDEVAEAAFDQCTGANPRYPLISELKQLLLDSFYGRPYKEAWERDEAAVEDKPA  
KGKSKAKA-----

>gi|85059350|ref|YP\_455052.1| bifunctional acetaldehyde-CoA/alcohol dehydrogenase  
[Sodalis glossinidius str. 'morsitans']  
-----MAVTNVA-----

-----ELN  
TLVAQVRKAQREYA-NFTQEVDKIFRAAALAA--ADARIPLAKMAVAESGMGIVEDKVI  
KNHFASEYIYNAYKDEKTCGILAEDDTFGTISIAEPIGLICGIVPTTNPTSTAIKFALIS  
LKTRNGIIFSPHPRAKNATNKAADIVLQAATAAGAPRDIIGWIDEPSVELSNQLMHPDI  
NLILATGGPGMVKAAYS-SGKPAIGVGAGNTPVVVDETADIKRVVASILMSKTFDNGVIC  
ASEQSVVVVDALYDQVRERF-ASHGGCML-RGQELKAVSDIIL-----KNGGL-----  
NAAIVGQPAAKIAEMAGLL--VPG-NTKVLIGE-VSKVDESEPFHEKLSPTLAMYRARD  
FEDAVIDAEKLVAMGGIGHTSCLYTNQDNQGERVKFFGDKMKTARILINTPASQG--GIG  
DLYNFKLAPSLTLGCGSWGGSISENVGPKHLINTKTVAKRAENMMWHLKPSIYFRRGS  
LPIALEEVA-SDGAKRAFIIVTDRYLFNNRYADQITSVLKKGHIEIEVFFVEADPTLSIV  
RKGAMQMNSFKPDTIIALGGGSPMDAAKIMWVMEYHPEVHFADLALRFMDIRKRIYKFPK  
MGVKAKMIAITTTSGTGSEVTPFAVVTDDATGQKYPLADYALVPDMAIVDANLVMNMPKS  
LCAFGGLDAVTHALEAYVSIMATEFSDGQALQALKLLKEYLPASYHDGKTNPVARERVHN  
AATIAGIAFANAFLGVCHSMAHKLGFHPIHGLANAMLVSNVIRYNANDNPTKQAAFSQ  
YDRPQARRRYAEIADHLGLSAA-GDRTAQKIEKLLQWLDEIKLELGIPTSIRKA-GVQEA  
DFLAKVDKLSDAFDDQCTSANPRYPLIAELKQILLDTYYGRKFVEPFDFNAVEAATAPAP  
VGDVKASVQAPKSEKKAKEKVTSS

>gi|126174148|ref|YP\_001050297.1| bifunctional acetaldehyde-CoA/alcohol  
dehydrogenase [Shewanella baltica OS155]  
-----MTVTNAQ-----

-----ELD  
LMVERVAKAQAEYA-TFSQAQVDKIFRAAALAA--ADARISLAKMAAAETRMGVVEDKVI  
KNHFASEYIYNKYKDEKTCGILSEDVTFGTITIAEVPVGIICGIVPTTNPTSTAIKFALIS  
LKTRNAIIFSPHPRAKVTSTTTAAKLVLDAAIAAGAPKDIIGWIDEPSVALSNQLMTHPKV  
NLILATGGPGMVKAAYS-SGKPAIGVGAGNTPIVIDETADIKRAVSSILMSKTFDNGVVC  
ASEQAVIVVDSIYEQVKERF-ISHGGYML-SKDETAAMQHVIL-----KNGGL-----  
NADIVGQSAASIAQMAGFE--VPH-WTKVLIGE-VTDICDSEAFHEKLSPLLGMYRAID  
FNDAMDKAELVALGGIGHTSGLYTDQDTQTERVHAFGFRMKTARILINTPASQG--GIG  
DLYNFKLAPSLTLGCGSWGGSISENVGSPSHLINKKTVAKRAENMLWHLKPSIYFRRGS  
LPIALEELS---DKKRALIITDRFLFNHGYCDETMRIKKAQGLETEIFYDVEADPTLAIIV  
RQGAKVAQSFKPDVIAALGGGSPMDAAKIIMWVMEYHPDVFADLALRFMDIRKRIYKFPK  
MGTKAMMVAIPTTSGTGSEVTPFAVVTDEITGKKYPIADYQLTPNMAIVDPNLVMDMPKS  
LTAFFGGIDAVTHALEAYVSVMANEYSDGQALQALDLLCKYLPDAYNLGSQSPVAREKVHN  
GATIAGIAFANAFLGICHSMAHKLGAEFHLAHGLANALLINNIRFNATDLPTKQAAFSQ  
YDRPKALCRYAAIADHLKLG---GKTDEEKVEKLLKITHLKTIGIPASIQEA-GVNEA  
DFLAKLDELAEDAFAFDQCTGANPRYLLINELKQLFLDSYYGRDYSDDN-----

>gi|220930559|ref|YP\_002507468.1| iron-containing alcohol dehydrogenase [Clostridium  
cellulolyticum H10]  
-----MTKKNMNVNSVD-----

-----TLL  
VKLAEIRKAQKEYS-TFTQEVDKIFLAASLAA--NKKRIPLSKMAQAETGMGVIEDKVI  
KNHYAAEYIYNAYKDTQTCGVIERDEAFGITKIAEPLGVAAIVPTTNPTSTAIKFALIA  
LKTRNGIIFSPHPRAKCTIEANVILEAAVAAGAPKGIIGWIDEPSIELSERVMKEADI  
--ILATGGPGMVKAAYS-SGKPAIGVGPGNPAIIDEADIKTAVSSIIIVSKTFDNGMIC  
ASEQSVIVLDKIYNEVRKEF-ILRGAYML-NKEETQKVREVIL-----VNGAL-----  
NAKIVGQTASTIAKLAGFE--VPA-ETKVLVGE-VESVELSEAFHEKLSPLVAMYKAKT  
FDDAVSKAERLIADGGFGHTASLYIDTVNSKDKLDFTAAMKTCRILINTPSAQG--GIG  
DLYNFKLAPSLTLGCGSWGGSVSENVGPKHLINIKTVAERRENMLWFRAPEKVYFKKGC  
LGVALRELKTEMNKQRAFIVTDSFLYNNGYTKAVTNLLDDMNIKHTFFDVAPDPTLACA  
KLGAEAMRDFKPDVIAIIGGGSPMDAGKIMWVMEYHPEVDFQDLAMRFMDIRKRVYTFPK  
IGEKAYFVAIPTSAVITDEQSGVKYPLADYELMPKMAIVDADLMMNMPKG  
LTAASGIDALTHAVEAYASMLLDYTKGLALQATKNIFEYLPAYENGAKDPIAREKMDA

SupplementalMultipleSequenceAlign.txt

ASTMAGMAFANSFLGICHSMHKLGFHHLPHGVANALLITEVMKFNIAEAPTKMGAFSQ  
YKYPEILKRYAEVASFIGIT---GSTDEEKFKKLIKIDELKAKVGLPKTIKEA-GVDEE  
KFLATLDEMVEQAFDDQCTGANPRYPLLSEIKDMYLKVVYGGK-----

>gi|114563069|ref|YP\_750582.1| bifunctional acetaldehyde-CoA/alcohol dehydrogenase  
[Shewanella frigidimarina NCIMB 400]

-----MTVTNTQ-----  
-----ELD  
LLVERVAKAQAEFA-NFSQEKVDTIFRAAALAA--ADARISLAKMAVTETGMGVLEDKVI  
KNHFASEYIYNKYKDEKTCGILSEDLTFGTITIAEPVGIICGIVPTTNPSTAIKALIS  
LKTRNGIIFSPHPRAKNSTTTAARIVLDAVAAGAPKDIIGWIDQPSVALSNQLMTHAKV  
NLILATGGPGMVKAAYS-SGKPAIGVGAGNTPIVIDETADIKRAVSSILMSKTFDNGVVC  
ASEQAVIVVDSIYKQVKERF-ISHGGHIL-SKAETAAMQSVIL-----KNGGL-----  
NADIVGQSAVSIAAMAGFE--VPS-TTKVLIGE-VTDINDAEFAHEKLSPLLGMYKAKD  
FNEAMDKAEALVTLGGIGHTSGLYTDQTDQDERVKAFGFRMKTARILINTPASQG--GIG  
DLYNFKLAPSLTLGCGSWGNSISENVGPSHLINKKMKVAKRAENMLWHKLPSSIYFRRGS  
LPIALEELS---DKKRALIITDKFLFNNGYCNETLKILKAQGLETEVFYEVEADPTLAIV  
RQGAKVAQSFQPDVIALGGGSPMDAAKIIWVMYEHPEVDFADLALRFMDIRKRIYKFKPK  
MGVKAQMVAIPTTSGTGSEVTPFAVVTDEVTGKKYPIADYQLTPNMAIVDPNLVMDMPKS  
LTAFGGIDAVTHALEAYVSMANEYS DGQALQALDLLFKYL PDSYEFGAKAPVAREKVVH  
GATIAGIAFANAFLGVCHSMHKLGAEFHLAHGLANALLISNVIRFNATDMPTKQAQFSQ  
YDRPKALCRYAAIADYLKLG---GKTDQKVEKLEKIEQLKTTIGIPASIQDA-GVNEA  
DFIAKLDELAEDAFDDQCTGANPRYPLIKELKQVLLDSFYGRAYKD-----

=====  
%% EutB [targeting tail not implicated]

>gi++|16765778|ref|NP\_461393.1| ethanolamine ammonia-lyase heavy chain [Salmonella  
typhimurium LT2]

-----MKLKTTLFGNVY  
QF-----KDVKEVLAKANELRSGD-----  
VLGAVAAASSQERVAQVLSMTVADIRNN-----PVIAYEEDCVTRLIQDDVNETA  
YNRKNSISELREYVLSDET---SVDDIAFTRKGLTSEVVAATAKICSNADLIYGGKMM  
PVIKANTTIGIPGTFSRQLPNDTRDDVQSIAAQIYEGLSFGAGDAVIGVNPVTDVVEN  
LTRVLDTVYGVIDKFNIP--TQGCVLAHVTTQIEAIRRG-APGGLIFQSICGSEKGLKEF  
GVELAMLDEARAVGAEFNRIA-----GENCLYFETGQGSALSAGANFG-----AD  
QVTMEARNYGLARHYDPFL-----VNTVVGFIGPEYLYNDRQIIRAGLEDH  
FMGKLSGISMGDCCYTNHADADQNLNENLMILLATAGCNYIMGMPDGDDIMLNYQTAF  
HDTATVRQLLNLPSPEFERWLETMGIMA--NGRLTKRAGDPSL--FF-----  
-----  
-----

>gi++|198245031|ref|YP\_002216528.1| ethanolamine ammonia-lyase, large subunit  
[Salmonella enterica subsp. enterica serovar Dublin str. CT\_02021853]

-----MKLKTTLFGNVY  
QF-----KDVKEVLAKANELRSGD-----  
VLGAVAAASSQERVAQVLSMTVADIRNN-----PVIAYEEDCVTRLIQDDVNETA  
YNRKNSISELREYVLSDET---SVDDIAFIRKGLTSEVVAATAKICSNADLIYGGKMM  
PVIKANTTIGIPGTFSRQLPNDTRDDVQSIAAQIYEGLSFGAGDAVIGVNPVTDVVEN  
LTRVLDTVYGVIDKFNIP--TQGCVLAHVTTQIEAIRRG-APGGLIFQSICGSEKGLKEF  
GVELAMLDEARAVGAEFNRIA-----GENCLYFETGQGSALSAGANFG-----AD  
QVTMEARNYGLARHYDPFL-----VNTVVGFIGPEYLYNDRQIIRAGLEDH  
FMGKLSGISMGDCCYTNHADADQNLNENLMILLATAGCNYIMGMPDGDDIMLNYQTAF  
HDTATVRQLLNLPSPEFERWLETMGIMA--NGRLTKRAGDPSL--FF-----  
-----  
-----

>gi++|16761376|ref|NP\_456993.1| ethanolamine ammonia-lyase heavy chain [Salmonella

SupplementalMultipleSequenceAlign.txt

enterica subsp. enterica serovar Typhi str. CT18]  
-----MKLKTTLFGNVY  
QF-----KDVKEVLAKANELRSGD-----  
VLGVAAASSQERVAQVLEMTVADIRNN-----PVIAYEEDCVTRLIQDDVNETA  
YNRIKNWSISELREYVLSDET---SVDDIAFTRKGLTSEVVAATAKICSNADLIYGGKKM  
PVIKANTTIGIPGTFSCRLQPNDRDDVQSIAAQIYEGLSFGAGDAVIGVNPVTDDVEN  
LTRVLDTVYGVIDKFNIPT--TQGCVLAHVTTQIEAIRRG-APGGLIFQSICGSEKGLKEF  
GVELAMLDEARAVGAEFNRIA-----GENCLYFETGQGSALSAGANFG-----AD  
QVTMEARNYGLARYYDPFL-----VNTVVGFIGPEYLYNDRQIIRAGLEDH  
FMGKLSGISMGDCCYTNHADADQNLNENLMILLATAGCNYIMGMPDGDDIMLNYQTTF  
HDTATVRQLLNLPSPEFERWLETMGIMA--NGRLTKRAGDPSL--FF-----  
-----  
-----  
-----

>gi++|161502392|ref|YP\_001569504.1| hypothetical protein SARI\_00426 [Salmonella  
enterica subsp. arizonae serovar 62:z4,z23:--]

-----MKLKTTLFGNVY  
QF-----KDVKEVLAKANELRSGD-----  
VLGVAAASSQERVAQVLEMTVADIRNN-----PVIAYEEDCVTRLIQDDVNETA  
YNRIKNWSISELREYVLSDET---SVDDIAFTRKGLSSEVVAATAKICSNADLIYGGKKM  
PVIKANTTIGIPGTFSCRLQPNDRDDVQSIAAQIYEGLSFGSGDAVIGVNPVTDDVEN  
LTRVLDTVYGVIDKFNIPT--TQGCVLAHVTTQIEAIRRG-APGGLIFQSICGSEKGLKEF  
GVELAMLDEARAVGAEFNRIA-----GENCLYFETGQGSALSAGANFG-----AD  
QVTMEARNYGLARHYDPFL-----VNTVVGFIGPEYLYNDRQIIRAGLEDH  
FMGKLSGISMGDCCYTNHADADQNLNENLMILLATAGCNYIMGMPDGDDIMLNYQTTF  
HDTATVRQLLNLPSPEFERWLETMGIMA--NGRLTKRAGDPSL--FF-----  
-----  
-----  
-----

>gi++|205353563|ref|YP\_002227364.1| ethanolamine ammonia-lyase heavy chain  
[Salmonella enterica subsp. enterica serovar Gallinarum str. 287/91]

-----MKLKTTLFGNVY  
QF-----KDVKEVLAKANELRSGD-----  
VLGVAAASSQERVAQVLEMTVADIRNN-----PVIAYEEDCVTRLIQDDVNETA  
YNRIKNWSISELREYVLSDET---SVDDIAFTRKGLTSEVVAATAKICSNADLIYGGKKM  
PVIKANTTIGIPGTFSCRLQPNDRDDVQSIAAQIYEGLSFGAGDAVIGVNPVTDDVEN  
LTRVLDTVYGVIDKFNIPT--TQGCVLAHVTTQIEAIRRG-APGGLIFQSICGSEKGLKEF  
GVELAMLDEARAVGAEFNRIA-----GENCLYFETGQGSALSAGANFG-----AD  
QVTMEARNYGLARHYDPFL-----VNTVVGFIGPEYLYNDRQIIRAGLEDH  
FMGKLSGISMGDCCYTNHADADQNLNENLMILLATAGCNYIMGMPDGDDIMLNYQTTF  
HDTATVRQLLNLPSPEFERWLETMGIMA--NGRLTKRAGDPSL--FF-----  
-----  
-----  
-----

>gi++|15802972|ref|NP\_289002.1| ethanolamine ammonia-lyase, heavy chain [Escherichia  
coli o157:h7 EDL933]

-----MKLKTTLFGNVY  
QF-----KDVKEVLAKANELRSGD-----  
VLGVAAASSQERVAQVLEMTVADIRNN-----PVIAYEDDCVTRLIQDDVNETA  
YNRIKNWSISELREYVLSDET---SVDDIAFTRKGLTSEVVAATAKICSNADLIYGAKKM  
PVIKANTTIGIPGTFSCRLQPNDRDDVQSIAAQIYEGLSFGVDAVIGVNPVTDDVEN  
LSRVLDTIYGVIDKFNIPT--TQGCVLAHVTTQIEAIRRG-APGGLIFQSICGSEKGLKEF  
GVELAMLDEARAVGAEFNRIA-----GENCLYFETGQGSALSAGANFG-----AD  
QVTMEARNYGLARHYDPFI-----VNTVVGFIGPEYLYNDRQIIRAGLEDH  
FMGKLSGISMGDCCYTNHADADQNLNENLMILLATAGCNYIMGMPDGDDIMLNYQTTF  
HDTATVRQLLNLPSPEFERWLESMGIMA--NGRLTKRAGDPSL--FF-----  
-----  
-----  
-----

SupplementalMultipleSequenceAlign.txt

>gi++|26248817|ref|NP\_754857.1| ethanolamine ammonia-lyase heavy chain [Escherichia coli CFT073]

-----MKLKTTLFGNVY  
QF-----KDVKEVLAKANELRSGD-----  
VLAGVAAASSQERVAAKQVLSEMTVADIRNN-----PVIAYEDDCVTRLIQDDVNETA  
YNQIKNWSISELREYVLSDEI---SVDDIAFTRKGLTSEVVAAVAKICSNADLIYGAKKM  
PVIKKANTTIGIPGTF SARLQPNDRDDVQSIAAQIYEGLSFGVGDAVIGVNPVTDDVEN  
LSRVLDTIYGVIDKFNIP--TQGCVLAHVTTQIEAIRRG-APGGLIFQSICGSEKGLKEF  
GVELAMLDEARAVGAEFNRIA-----GENCLYFETGQGSALSAGANFG-----AD  
QVTMEARNYGLARHYDPFI-----VNTVVGFIFGPEYLYNDRQIIRAGLEDH  
FMGKLSGISMGDCCYTNHADADQNLNENLMILLATAGCNYIMG MPLGDDIMLNYQTTF  
HDTATVRQLLNLRPSPEFERWLESMGIMA--NGRLTKRAGDPSL--FF-----

>gi++|218696076|ref|YP\_002403743.1| ethanolamine ammonia-lyase, large subunit, heavy chain [Escherichia coli 55989]

-----MKLKTTLFGNVY  
QF-----KDVKEVLAKANELCSGD-----  
VLAGVAAASSQERVAAKQVLSEMTVADIRNN-----PVIAYEDDCVTRLIQDDVNETA  
YNQIKNWSISELREYVLSDET---SVDDIAFTRKGLTSEVVAAVAKICSNADLIYGAKKM  
PVIKKANTTIGIPGTF SARLQPNDRDDVQSIAAQIYEGLSFGVGDAVIGVNPVTDDVEN  
LSRVLDTIYGVIDKFNIP--TQGCVLAHVTTQIEAIRRG-APGGLIFQSICGSEKGLKEF  
GVELAMLDEARAVGAEFNRIA-----GENCLYFETGQGSALSAGANFG-----AD  
QVTMEARNYGLARHYDPFI-----VNTVVGFIFGPEYLYNDRQIIRAGLEDH  
FMGKLSGISMGDCCYTNHADADQNLNENLMILLATAGCNYIMG MPLGDDIMLNYQTTF  
HDTATVRQLLNLRPSPEFERWLESMGIMA--NGRLTKRAGDPSL--FF-----

>gi++|91211779|ref|YP\_541765.1| regulatory subunit of ethanolamine ammonia-lyase [Escherichia coli UTI89]

-----MKLKTTLFGNVY  
QF-----KDVKEVLAKANELRSGD-----  
VLAGVAAASSQERVAAKQVLSEMTVADIRNN-----PVIAYEDDCVTRLIQDDVNETA  
YNQIKNWSISELREYVLSDET---SVDDIAFTRKGLTSEVVAAVAKICSNADLIYGAKKM  
PVIKKANTTIGIPGTF SARLQPNDRDDVQSIAAQIYEGLSFGVGDAVIGVNPVTDDVEN  
LSRVLDTIYGVIDKFNIP--TQGCVLAHVTTQIEAIRRG-APGGLIFQSICGSEKGLKEF  
GVELAMLAEARAVGAEFNRIA-----GENCLYFETGQGSALSAGANFG-----AD  
QVTMEARNYGLARHYDPFI-----VNTVVGFIFGPEYLYNDRQIIRAGLEDH  
FMGKLSGISMGDCCYTNHADADQNLNENLMILLATAGCNYIMG MPLGDDIMLNYQTTF  
HDTATVRQLLNLRPSPEFERWLESMGIMA--NGRLTKRAGDPSL--FF-----

>gi++|209919922|ref|YP\_002294006.1| ethanolamine ammonia-lyase heavy chain [Escherichia coli SE11]

-----MKLKTTLFGNVY  
QF-----KDVKEVLAKANELRSGD-----  
VLAGVAAASSQERVAAKQVLSEMTVADIRNN-----PVIAYEDDCVTRLIQDDVNETA  
YNQIKNWSISELREYVLSDET---SVDDIAFTRKGLTSEVVAAVAKICSNADLIYGAKKM  
PVIKKANTTIGIPGTF SARLQPNDRDDVQSIAAQIYEGLSFGVGDAVIGVNPVTDDVEN  
LSRVLDTIYGVIDKFNIP--TQGCVLAHVTTQIEAIRRG-APGGLIFQSICGSEKGLKEF

SupplementalMultipleSequenceAlign.txt

GVELAMLDEARAVCAEFNRIA-----GENCLYFETGQGSALSAGANFG-----AD  
QVTMEARNYGLARHYDPFI-----VNTVVGFIFGPEYLYNDRQIIRAGLEDH  
FMGKLSGISMGDCCYTNHADADQNLNENLMILLATAGCNYIMG MPLGDDIMLNYQTTF  
HDTATVRQLLNLRPSPEFERWLENMGIMA--NGRLTKRAGDPSL--FF-----  
-----  
-----  
-----

>gi++|218690576|ref|YP\_002398788.1| ethanolamine ammonia-lyase, large subunit, heavy chain [Escherichia coli ED1a]

-----MKLKTTLFGNVY  
QF-----KDVKEVLAKANELRSGD-----  
VLAGVAAASSQERVAQVLSMTVADIRNN-----PVIAYEDDCVTRLIQDDVNETA  
YNQIKNWSISELREYVLSDEI---SVDDIAFTRKGLTSEVVAATAKICSNADLIYGAKKM  
PVIKKANTTIGIPGTF SARLQPNDRDDVQSIAAQIYEGLSFGVGDVIGVNPVTDDVEN  
LSRVLDTIYGVIDKFNP--TQGCVLAHVTTQIEAIRRG-APGGLIFQSIKSEKGLKEF  
GVELAMLDEARAVGAEFNRIA-----GENCLYFETGQGSALSAGANFG-----AD  
QVTMEARNYGLARHYDPFI-----VNTVVGFIFGPEYLYNDRQIICAGLEDH  
FMGKLSGISMGDCCYTNHADADQNLNENLMILLATAGCNYIMG MPLGDDIMLNYQTTF  
HDTATVRQLLNLRPSPEFERWLESMGIMA--NGRLTKRAGDPSL--FF-----  
-----  
-----  
-----

>gi++|152971315|ref|YP\_001336424.1| ethanolamine ammonia-lyase, heavy chain [Klebsiella pneumoniae subsp. pneumoniae MGH 78578]

-----MKLKTTLFGNVY  
QF-----KDVKEVLAKANELRSGD-----  
VLAGVAAESSQQRVAQVLSMTVADIRNN-----PVIPEEEDCVTRLIQDDVNETA  
YQRIKHWITISDLREYVLNDEV---TSDDIAFVRKGLTSEVVAATAKICSNADLIYGGKKM  
PVIKKANTTIGLPGTF SCLQPNDRDDVQSIAAQIYEGLSFGAGDAVIGVNPVTDDVEN  
LSRVLDTVYGVIDKFNP--TQGCVLAHVTTQIEAIRRG-APGGLIFQSIKSEKGLKEF  
GVELAMLDEARAVGAEFNRIA-----GENCLYFETGQGSALSAGANFG-----AD  
QVTMEARNYGLARHYDPFL-----VNTVVGFIFGPEYLYNDRQIIRAGLEDH  
FMGKLSGISMGDCCYTNHADADQNLNENLMILLATAGCNYIMG MPLGDDIMLNYQTTF  
HDTATVRQLLGLRPSPEFERWLETMGIMA--NGRLTKRAGDPSL--FF-----  
-----  
-----  
-----

>gi++|206580690|ref|YP\_002237213.1| ethanolamine ammonia-lyase, large subunit [Klebsiella pneumoniae 342]

-----MKLKTTLFGNVY  
QF-----KDVKEVLAKANELRSGD-----  
VLAGVAAESSQQRVAQVLSMTVADIRNN-----PVIPEEEDCVTRLIQDDVNETA  
YQRIKHWITISDLREHVLNDEV---TSDDIAFVRKGLTSEVVAATAKICSNADLIYGGKKM  
PVIKKANTTIGLPGTF SCLQPNDRDDVQSIAAQIYEGLSFGAGDAVIGVNPVTDDVEN  
LSRVLDTVYGVIDKFSIP--TQGCVLAHVTTQIEAIRRG-APGGLIFQSIKSEKGLKEF  
GVELAMLDEARAVGAEFNRIA-----GENCLYFETGQGSALSAGANFG-----AD  
QVTMEARNYGLARHYDPFL-----VNTVVGFIFGPEYLYNDRQIIRAGLEDH  
FMGKLSGISMGDCCYTNHADADQNLNENLMILLATAGCNYIMG MPLGDDIMLNYQTTF  
HDTATVRQLLGLRPSPEFEGWLERMGIMA--NGRLTKRAGDPSL--FF-----  
-----  
-----  
-----

>gi++|82544902|ref|YP\_408849.1| ethanolamine ammonia-lyase, heavy chain [Shigella boydii sb227]

-----MQNELQTALFQAFDTLNLQRVKTFVPPVTLCPGSGVSSCGQAQTRGLKH

SupplementalMultipleSequenceAlign.txt

L FVMADSFLHQAGMTAGLTRSLAVKGIAMTLWPCVGEPCITDVCAAVAQLRESGCDGVI  
AFGGGSVLDAAKAVALLVTNPSTLAEMSETSVLQPRPLIAYEDDCVTRLIQDDVNETA  
YNQIKNWSISELREYVLSDET---SVDDIAFTRKGLTSEVVAAVAKICSNADLIYGAKKM  
PVIKKANTTIGIPGTF SARLQPNDRDDVQSIAAQIYEGLSFGVGDVAVIGVNPVTDVVEN  
LSRVLDTIYGVIDKFNP--TQGCVLAHVTTQIEAIRRG-APGGLIFQSIGSEKGLKEF  
GVELAMLDEARAVGAEFNRIA-----GENCLYFETGQGSALSAGANFG-----AD  
QVTMEARNYGLARHYDPFI-----VNTVVGFIFGPEYLYNDRQIIRAGLEDH  
FMGKLSGISMGDCCYTNHADADQNLNENLMILLATAGCNYIMGMPLGDDIMLNYQTTF  
HDTATVRQLLNLRPSPEFERWLESMGIMA--NGRLTKRAGDPSL--FF-----

>gi++|120554166|ref|YP\_958517.1| ethanolamine ammonia lyase large subunit  
[Marinobacter aquaeolei VT8]

-----MNLKTTLFGKVY  
QF-----RDVKDVLAKANELRSGD-----  
VLAGVAAETAQERVAQKQVLSERLETLREN-----PIVPYEEDAITRVIQDAVNKAA  
YEDIRHWTVSELREYILSDVP---TREDYERMRRGLTSEMVAAVCKICSNGLMVGAKKL  
YVISKANCTVGIPGRFSSRLQPNDRDDIDSIMVQVYEGLSYGCGDAVIGINPVTESVEN  
TIRILNAVKEATDKWNIP--TQGCVLAHISNQMAALEKG-APGGLLFQSLSGTEKGLNEF  
GVTVELLDEAYEMGKHYCKLA-----GSNMMYFETGQGTALSANAHHG-----AD  
QVTIEARNYGLAKRYKPHL-----LNTVVGFIFGPEYLFNHQQITRAALEDH  
FMGKLTGISMGCDACYTNHADTDQNSNENLTLLAAAGCNYVMSLPLGDDIMLNYQTTF  
HDVVATARQLLSYRPAPEFEAWMETMGLME--NGKLTARAGDPSI--FF--D-----

>gi++|116872549|ref|YP\_849330.1| ethanolamine ammonia lyase large subunit [Listeria  
welshimeri serovar 6b str. SLCC5334]

-----MILKTNLFGHTY  
QF-----KSITDVLAKANEKSGD-----  
RLAGVAAESAERVAQKQVLSKMTLGDLRNN-----PVVPYETDEVTRIIQDQVNERI  
HDSIKNWTVEELREWILDHKT---TDADIKRVSRLTSEIIAAVTKLMSNLDLIYGAKKI  
RVIAHANTTIGLPGTF SARLQPNHPTDDPDGILASLMEGLTYGIGDAVIGLNPVDDSTDS  
VVRLLNKFEFRSKWDVP--TQTCVLAHVKTQMEAMRRG-APTGLVFQSIAGSEKGNATF  
GFDGATIEEARQLALQSGAAT-----GPNVMYFETGQGSSELSSDAHFG-----VD  
QVTMEARCYGFAKKFDPFL-----VNTVVGFIFGPEYLYDSKQVIRAGLEDH  
FMGKLTGISMGCDVCYTNHMKADQNDVENLSVLLTAAGCNFIMGIPHGDDVMLNYQTTF  
HETATLREL FGLKPIKEFDQWMEKMGFSE--NGKLT SRAGDASI--FL--K-----

>gi++|16800208|ref|NP\_470476.1| hypothetical protein lin1139 [Listeria innocua  
Clp11262]

-----MILKTNLFGHTY  
QF-----KSITDVLAKANEKSGD-----  
RLAGVAAESAERVAQKQVLSKMTLGDLRNN-----PVVPYETDEVTRIIQDQVNERI  
HDSIKNWTVEELREWILDHKT---TDADIKRVARGLTSEIIAAVTKLMSNLDLIYGAKKI  
RVIAHANTTIGLPGTF SARLQPNHPTDDPDGILASLMEGLTYGIGDAVIGLNPVDDSTDS  
VVRLLNKFEFRSKWDVP--TQTCVLAHVKTQMEAMRRG-APTGLVFQSIAGSEKGNATF  
GFDGATIEEARQLALQSGAAT-----GPNVMYFETGQGSSELSSDAHFG-----VD  
QVTMEARCYGFAKKFDPFL-----VNTVVGFIFGPEYLYDSKQVIRAGLEDH  
FMGKLTGISMGCDVCYTNHMKADQNDVENLSVLLTAAGCNFIMGIPHGDDVMLNYQTTF  
HETATLREL FGLKPIKEFDQWMEKMGFSE--NGKLT SRAGDASI--FL--K-----

SupplementalMultipleSequenceAlign.txt

>gi++|28211785|ref|NP\_782729.1| ethanolamine ammonia-lyase heavy chain [Clostridium tetani E88]

-----MRKVILKTKLFGKIY  
QF-----KDVKEVLAKANEKESGD-----  
KLAGVAANSAQERIAAKVVLSNLTVADLRNN-----PVVPYETDEITRIIQDSVNEKI  
YGEVKNWTISELREWILNENT---TGAQIKRISRGLTSEVIAGVAKLMSNLDLIYGANKI  
KITAHCNNTTIGENGRLSARLQPNHPTDDVDGIVASLLEGLSFGIGDALIGLNPVDDTTGS  
VVRVLKKFEEIKQKYEIP--TQNCVLAHVTTQMEAIKKG-APTDLIFQSIAGSEKGNAAF  
GITADLIEEARQLALTEGTA-----GPNVMYFETGQGSLSAEAHFG-----AD  
QVTMEARCYGFAKKYEPFV-----VNTVVGFIGPEYLYDSKEVIRAGLEDH  
FMGKLTGISMGCDCVYTNHMKADQND AENLAVLLSTAGCNYFMGIPHGDDVMLNYQTTGY  
HETASLRELLNKRPIVEFEGWLEKWFMK--DGKLTSKAGDASV--FL--KK-----

>gi++|29376187|ref|NP\_815341.1| ethanolamine ammonia-lyase large subunit [Enterococcus faecalis V583]

-----MILKTKLFGKVY  
QF-----TSVKEVLAKANEKESGD-----  
KLAGVAANSAEERVAAKVVLSLSLNDLFNN-----PVVDYDEDEVTRIIIDQVNMRI  
FESIKHWTVAELREFILSSET---TDFDIKRISRGLTSEMIAAVCKLMSNMDLIVGAKKI  
NIEKTANTTIGRPGTFSNRLQPNHPTDNVDGIMASVMEGLSYGAGDALIGLNPVDDSTES  
VKRILNKFEFRSEWEIP--TQTCVLAHVTTQMEAMRQG-APTGLVFQSIAGSEKGNATF  
GLNAEILAEAQDLALHSGQAA-----GPNVMYFETGQGSLSSEANFG-----AD  
QVTMEARCYGLAKKFDPIYI-----VNTVVGFIGPEYLYDSKQVIRAGLEDH  
FMGKLTGISMGCDCVYTNHMKADQNDMENLAMLATAGCTYIMGIPHGDDVMLNYQTTGF  
HETATIRETLGLRPIKEFEWMEKMLME--NGKLTSRAGDASV--FI--K-----

>gi++|16803215|ref|NP\_464700.1| hypothetical protein lmo1175 [Listeria monocytogenes EGD-e]

-----MILKTNLFGHTY  
QF-----KSITDVLAKANEKESGD-----  
RLAGVAAESAEERVAAKVVLSKMTLGDLRNN-----PVVPYETDEVTRIIQDQVNDRI  
HDSIKNWTVEELREWILDHKT---TDADIKRVARGLTSEIIAAVTKLMSNLDLIYGAKKI  
RVIAHANTTIGLPGTFSARLQPNHPTDDPDGILASLMEGLTYGIGDAVIGLNPVDDSTDS  
VVRLLNKFEFRSKWDVP--TQTCVLAHVKTQMEAMRRG-APTGLVFQSIAGSEKGNATF  
GFDGATIEEARQLALQSGAAT-----GPNVMYFETGQGSLSDDAHFG-----VD  
QVTMEARCYGFAKKFDPFL-----VNTVVGFIGPEYLYDSKQVIRAGLEDH  
FMGKLTGISMGCDCVYTNHMKADQNDVENLSVLLTAAGCNFIMGIPHGDDVMLNYQTTGY  
HETATLRELFLGKPIKEFDQWMEKMGFSE--NGKLTSRAGDASI--FL--K-----

>gi++|150388098|ref|YP\_001318147.1| ethanolamine ammonia lyase large subunit [Alkaliphilus metalliredigens QYMF]

-----MILKSKLFGTVY  
QF-----KSLNEVMAKANEERSGD-----  
KLAGLAAESVTEMVAAKEVLSNITLKDINRNN-----PAVPYETDEVTRVIQDGVNEKI  
YKEIQNWTVSELREWILSNET---TGSDIKRIGRGLTSEMVAAVTKLMSNLDLVYGAKKI  
IVTAHCNNTTIGESGTLAYRLQPNHTTDNIEGKIVSLYEGLSYGVGDAVGLNPVNDTVNS  
VKNVNLNFEEVKQKWQIP--TQTCVLAHITTQMEAIRQG-APSDMIFQSIAGTEKGNFAF  
GLNDSLSEARELVLKEGTST-----GPNVMYFETGQGSLSDDAHMG-----VD  
QVTLEARCYGLAKKHSPFL-----VNTVVGFIGPEYLYNSKQVMRAGLEDH

SupplementalMultipleSequenceAlign.txt

FMGKLSGIPMGVDVCYTNHMKADQNDIENLSVLLASAGCNFLIGTPAGDDIMLNYQSSSF  
HDAATLRELLNLTPIPEFQKWLEKMGISE--NGRLSKRAGDASI--FF--SK-----

>gi++|125717383|ref|YP\_001034516.1| ethanolamine ammonia-lyase large subunit,  
putative [Streptococcus sanguinis SK36]

-----MILKTKLFGRLY  
EF-----KSVKEVLAKANEYKSGD-----  
QLAGVAAESAERVAAKVVLAQLKLSDFNN-----PVVPYEEDEVTRIIIDVNLRT  
YEKIKNWTVEELREWILDNKT---KNVDIQWLSRGLTSEMVAAVAKLMTNLDLIVAANKI  
VITKHANTTIGMPGTFSSRLQPNHTTDDPDGIMASTMEGFAYGCGDALLGLNPVDDSVES  
TKRVLHKFNDFIEEYKIP--TQHCVLAHVTTQIEAMNQG-APTGLVFQSIAGSEKGNFAF  
GFDAKIIQEAWDTALKVGTAA-----GPNVMYFETGQGSELSSDAHNG-----AD  
QVTMEARCYGFAKRFDPFL-----VNTVVGFIGPEYLYDSKQVIRAGLEDH  
FMGKLTGISMGCDCYTNHMKADQNDIENLVLGAANVNYIMAIIPHGDDIMLNYQTTGY  
HETATMRSLLNKRPIKEFEWMEKMLME--DGHLTEIGGDGSI--FM--KSN-----

>gi++|158319837|ref|YP\_001512344.1| ethanolamine ammonia lyase large subunit  
[Alkaliphilus oremlandii OhILAs]

-----MILKTKLFGKTY  
QF-----SSVMEVMGKANEKSGD-----  
NLAGVAAESAERVAAKVVLSQLKLSDFNN-----PAVPYEKDEVTRIIIDHVNLKT  
YERIKNWTVAELREWILNSNT---TNYDIHRISNGLTAEMVAAVAKIMSNDLIVGAQKI  
VVTKTANTTIGVPGTFSTRQLQPNHTTNDVDGIMATVMEGLSMGAGDAVIGLNPVDDTTES  
VKRILHKFNDFINKWEIP--TQHVLAHVATQMEAMEQG-APTGLVFQSIAGSEKGNAAF  
GISAKMLSEAKDMALKLGTAV-----GPNVMYFETGQGSELSSDAHNG-----VD  
QLTMEARCYGFAKHDFPFL-----VNTVVGFIGPEYLYDSKQVIRAGLEDH  
FMGKLTGISMGCDCYTNHMKADQNDIENLTVLLATAGVNFIMGIPNGDDIMLNYQTTGF  
HEGASIRQLLNKRTIKEFDQWLEKMGFSE--NGRLTSKAGDASV--FL--KG-----

>gi++|18309880|ref|NP\_561814.1| ethanolamine ammonia lyase heavy chain [Clostridium  
perfringens str. 13]

-----MILKTKLFGKVY  
AF-----KSLNEVMAKANEKSGD-----  
RLAGLAAESSEERVAAKVVLSNITLEDLRNN-----PAVPYEIDEVTRIIQDDVNEKI  
YNEIKHWTVSEFREWILDENT---TGADIRRISRGLTSEMVAAVAKLMSNMDLIYGARKI  
KVTAHCNTTIGKGTLSARLQPNHPTDDPDGIMASLLEGLTFGVGDAVLGLNPVDDSVES  
VTKVLKRFDEIKRKFIP--TQTCVLAHVTTQMEAIRQG-APTDLIFQSIAGSEKGNFAF  
GFNAATIEEARQLALKQGTAT-----GPNVMYFETGQGSELSSDAHNG-----VD  
QVTMEARCYGFAKRFQPFLL-----VNTVVGFIGPEYLYDSKQVIRAGLEDH  
FMGKLTGIPMGCDACYTNHMKADQNDIENLAVLLTTAGCTYFMGIPHGDDVMLNYQTTGY  
HETAALREMFLTAIKEFDQDLVEMGFVD-ENGKLTCKAGDASV--LL--G-----

>gi++|160880778|ref|YP\_001559746.1| ethanolamine ammonia lyase large subunit  
[Clostridium phytofermentans ISDg]

-----MILKAQLFGHTY  
EF-----KSLMDVMKANEKSGD-----  
TLAGIAAESAEQRVAAKVVLSNITLQLRNN-----PAVPYEIDEVTRIIQDDVNEKI



SupplementalMultipleSequenceAlign.txt

YNEIKHWTVAEFREWILDENT---TGADIRRVSRGITSEMVAAVAKLMSNMDLVYGARKI  
RVTAHCNTTIGEPGTLSCRLQPNHPTDDPDGIMASLLEGLTYGAGDALLGLNPVDDSTES  
VMRVLKRFDEIKHKFNIP--TQTCVLAHVTTQMDAIRKG-APSDLIFQSIAGSEKGNFAF  
GFTAAILEEARQLALTEGTAE-----GPNVMYFETGQGSLSSEAHHG-----VD  
QVTMEARCYGFAKRFNPFV-----VNTVVGFIGPEYLYDGRQVNRAGLEDH  
FMGKLTGISMGCACYTNHMKADQNTIEDLSVLLTTAGCNYFMGIPHGDVMLNYQTTGY  
HETAALREMFGTLAIKPFHEWMIHMGFID-EKGKLTLAGDASV--LF-----  
-----  
-----  
-----  
-----

>gi++|126699523|ref|YP\_001088420.1| putative ethanolamine/propanediol ammonia-lyase  
heavy chain [Clostridium difficile 630]

-----MILNTKLFGRTY  
QF-----KGLYDVMAKANEEKSGD-----  
KLAGLAAESAERIAAKVVLSHIKLEDIRNN-----PAVAYEEDEVTRIIQDAVNEKV  
YEEIKNWTVSELREWLLDSNT---TSLDIRRISRGLTSEMIAAVAKLMSNMDLVYAAKKI  
KVTAHCNTTIGEQGTL SARLQPNHPTDDPDGILASLLEGLTFGIGDAVGLGNPVDDSVES  
VTKVLKRFEEVKQKYQIP--TQTCVLAHVTTQMEAIRNG-APADLIFQSIAGSEKGNFAF  
GFNGDTIEEARQLALKHGTAT-----GPNVMYFETGQGSLSSEAHHG-----ID  
QVTMEARCYGFAKKYEPFL-----VNTVVGFIGPEYLYDAREVVRAGLEDH  
FMGKHLGLPMGVDCYTNHMKADQNDMENLAILTTAGCTYFMGIPHGDVMLNYQTTGY  
HETASLREMFGTLAIKEFDAMMEKMGFSK--DGKLTLAGDASI--LL--G-----  
-----  
-----  
-----  
-----

>gi++|119718253|ref|YP\_925218.1| ethanolamine ammonia-lyase heavy chain  
[Nocardioides sp. JS614]

-----MQLAATLFGTRY  
QF-----RDIKDLLAKANEKSGD-----  
RLAGVAADSAAERMAARFVLSVETLETLRAN-----PAVPYEEDEVTRVIDDGVNEAV  
YAEIKGMQVRELREWLLADTT---TGEMIRRLSNGLTAEMVAAVTKLMSNLDLMLAASKI  
KIVKHANNTIGLRGTLASRCQPNNTDSVEGIRAAVYEGLSFGSGDSVIGINPSDDSLGS  
VSRLLEMTHEVITRWEIP--TQNCVLAHVSTQMEAMRHG-APVGLVFQSLAGSQKGNESF  
GIDVGMLEAYALAKRYSVAT-----GPNMYFETGQGSLSADAHHG-----AD  
QVVMEARCYGLAKRYDPFQ-----LNTVVGFIGPEYLYDSTQITRAGLEDH  
FMGKLTGISMGADVCYTNHARSTQNELENLAVLLGAAGVNFIMGIPMGDDSMLSYQSSSF  
HDAPSLRQLLGLRPLPEFEAWMEGLGLLR--DGRLTEKAGDASF--FL--SR-----  
-----  
-----  
-----  
-----

>gi++|51893201|ref|YP\_075892.1| ethanolamine ammonia-lyase, heavy chain  
[Symbiobacterium thermophilum IAM 14863]

-----MILKTTLRGQVY  
QF-----RSVKEVLAKANELRSGD-----  
VLAGIAAETAERVAAKHVLANLTLEDLRNN-----PVIPEEDEVTRVIQDAVNEHV  
YRQIKGWTVAELEREYILSDKA---DAQEIQRISRGLTSEMVAAVAKLCSNLDLIYGASKM  
HNVVQCNTTIGLPGTLAMRLQPNPVDSDIGIMPQIMEGLSYGIGDAVIGINPVNDDPES  
VSRLLEWVYEFMEKWRIP--TQQCVAHVTTQMRCIRDG-APVGLVFQSIAGSEKAMEAF  
GVSVEMLDEALELVRKYGSAK-----GPNLMYFETGQGSLSADAHHG-----AD  
QVTLEARCYGLAKRYQPLL-----VNTVVGFIGPEYLYDAKQVIRAGLEDV  
FMGKLTGISMGCACYTNHMKADQHDIEENLAVLLTAAGVNYFIGVPMGDDPMLNYQCGAF  
HDGAAPWRITSRP-----  
-----  
-----  
-----  
-----

SupplementalMultipleSequenceAlign.txt

>gi++|19703431|ref|NP\_602993.1| ethanolamine ammonia-lyase heavy chain [Fusobacterium nucleatum subsp. nucleatum ATCC 25586]

-----MILSVELFDHVV  
NF-----SSLKEVMAKANEEKSGD-----  
TLAGIAAASSKERVAAKVVL SKITLKD LKEN-----PAVPYEEDEVTRIIIDDLNLQI  
YDEIKDWTVSDLREWLLSEEA---TPSKINWIRRGLTSEMIAAVAKLMSNMDLIVAAKKI  
EVRAHCNTTIGGYDTLAVRLQPNHTTDDPDGIMISTLEGLSYGIGDAVIGLNPVDDSVDS  
VMAMVERFHKIKTEYQIP--TQTCVLAHVTTQMEAIKRG-AKVDMIFQSIAGSEKGN EAF  
GITGAMIEEARQLGLKYGTAA-----GPNIMYFETGQGSSELSSDAHNG-----AD  
QVTMEARCYGFAKRFQPF L-----VNTVVGF IGPEYLYDSKQVIRAGLEDH  
FMGKLHGLPMGV DVCYTNHMKAEQSDVEILATLLTAAGCNYFMGVPAGDDIMLNYQTTGF  
HDNQSLRELFGKQPIKEFKEWLVKYGFMT-EDGKLTEKAGDPSV--FL--K-----  
-----  
-----  
-----  
-----

>gi++|89897708|ref|YP\_521195.1| hypothetical protein DSY4962 [Desulfitobacterium hafniense Y51]

-----MILKAKVYHKVF  
AF-----KDLKEVLAKANEKSGD-----  
VLAGIGATSASERVA AKLVLSNLTLEDLYNH-----PVL PYEEDEVTRVIYDGLNLR I  
YQEMKGWTVGQLREYILDHGT---TGSHLNHISRGLTSEMIAAVAKLMSNMDLVYGSKKM  
RHQAHCNTTIGIPGTLAFCRQPNHPTDSVEGVMASLKEGLSYGSGDAVIGINPVEDNVD T  
LSRLL ETVKEFMQWEIP--TQNCVLAHITTQMKAITKG-VPIDLVFQSIAGTQKANEAF  
GISKELIDEAFALIQRNGTAT-----GPNLMYFETGQGSEISLAAHHG-----VD  
MMTLESRTYGFGRHYRPFL-----LNNVSGFIGPETIYSGREVIRADLEDL  
FMGKLHGLPMGIAPCYTNHMKADQNDQEIATLLCAMAGANYFMGLPGGDDVMLS YQDTSY  
HDDAATREILGLRPLPEFEKWLEKMGIME--NGQLTERAGDPSV--FD--K-----  
-----  
-----  
-----  
-----

>gi++|169827647|ref|YP\_001697805.1| ethanolamine ammonia-lyase heavy chain [Lysinibacillus sphaericus C3-41]

-----MNVNLSVIFGGEKY  
NF-----KSLKDVMAKANEKSGD-----  
QLAGIAAETVQQRVAAKAVLSELLVKDIREN-----PLVPQENDEVSR IIEGDINEQI  
YGEIKNWSIEQLREYILSNDT---GDRELKRLSKGMNSEVIAAVTKLMSNLDLVHAANKV  
EILSTCNITIGQKGTLSRRLQPNHPTDNIDGIIASLKEGLSYGIGDAVIGINPVDDSVES  
VKKVLTATKEFINDWSIP--TQNCVLAHITTQMKAIKQG-APADMIFQSIAGTEIANRSF  
GISADLIREAEELIKKQGTGT-----GPNLFYFETGQGSSEL SAEAHMG-----ID  
QVTLESRNYGFARHFNPYI-----VNTVVGF IGPEYLYNKKQVIRAGLEDH  
FMGKMHGIPMGVDICYTNHIKADQNDVEDLSVLLTAAGVNFIIAAPMGDDVMLNYQSMSF  
HDVATLLQTFGKKPAPEYLAWLEKMG IYE--NGRLSARAGDLSI--FE--R-----  
-----  
-----  
-----  
-----

>gi|37526860|ref|NP\_930204.1| ethanolamine ammonia-lyase heavy chain [Phototrhodus luminescens subsp. laumondii TT01]

-----MKLKTQLFGKTY  
QF-----KDVKQVLAMANELRSGD-----  
VLAGVAAESSQQRVAAKHVLS EMTIADIRMN-----PIIPYEEDEVTRIIQDDINEIA  
YAGIKNWSIGELREYILSDDT---RVDDIAFLRKGISSEVVA AVAKISSNADLIYGAKKM  
PVIKANTTIGTPGTF SARLQPNDRDDVQSILAQIYEGLSFGVGDAVIGVNPVTD DVEN  
LTRVLD TLYEVIDKFSIP--TQGCVLAHVTTQIEAIKRG-APGGLIFQSI CGSEKGLKEF  
GVELAMLDEARAVGA EYCRLA-----GDNCLYLETGQGSAL SAGAHFG-----AD  
QVTMEARNYGLARHYDPFL-----VNTVVGF IGPEYLYNDRQIIRAGLEDH  
FMGKLSGVSMGDCCYTNHADSDQNQENLMILLATAGCNFIMG MPLGDDIMLNYQTSAF  
HDTATIRHLLNLRPSPEFERWLEQMGLMA--NGRLTSRAGDASF--FF-----  
-----  
-----  
-----  
-----

SupplementalMultipleSequenceAlign.txt

>gi|15895975|ref|NP\_349324.1| ethanolamine ammonia lyase large subunit [Clostridium acetobutylicum ATCC 824]

-----MNLKTTLFNTTY  
KF-----KDIKDV LAKANEK KSGD-----  
EMAGIAASGARERVA AKTVLADITL EELRNN-----PVVSYEKDEITRVIQDSVDEEQ  
YKKIKALTVGEFRNLLSSET---DEDKIKEIRDGLTSEMIAAVTKLMSNMDLVYAAQKI  
CNTAKNTTIGRRGT FSSRLQPNHPTDNPQGIMASLIDGISYGVGDAVIGLNPVADTIES  
VSDVLKVFNDFTRKWRIP--TQNCVLAHITTQMEALKNG-VPIDLMFQSIAGSEIANKDF  
GISVALLDEAYELMKTKKSSK-----GPNFMYFETGQGTLSSEGNNR-----AD  
QLVMEARCYGLAKRYKPFL-----VNTVVGFIGPEYLYDGKQVIRAGLEDH  
FMGKLTGLSMGVDTCYTNHMKADQNDLENLAML LLAANCNYLMGIPCGDDVMLMYQSSSY  
HDIATLREISDKRPIKEFEKRMEELGIMK--NGKLTRNAGDPSI--FM-----  
-----  
-----  
-----

>gi|186474779|ref|YP\_001856249.1| ethanolamine ammonia lyase large subunit [Burkholderia phymatum STM815]

-----MSYMETIGSRTY  
RF-----ADLKSLMAKASPLRSGD-----  
QLAGIAAASEEERVA AKMALADVPLRTFLNE-----ALIPYESDEVTRLVIDTHSPEA  
FAPIAHLTVGEFRNLLSSET---DTDTL TRVTKGLTPEMVA AVSKLMRNQDLILAARKR  
PVITRFRNTVGLPGHMSVRLQPNHPTDDVKGIAAS MIDGLMYGCGDAMIGINPASDSL SA  
ITNLLL MIDDFRTRYHVP--TQSCVL THVTNTISAIEKG-APVDLVFQSIAGTEKANAGF  
GISLALLQEAYE AALAKRGT-----VGDNVMYFETGQGSAL SADAHHG-----VD  
QQTCEVRAYAVARHFNPFL-----VNTVVGFIGPEYLYDGKQITRAGLEDH  
FCGKLLGVPMGCDICYTNHAEADQDDMDNLLTLLGVAGINFIMGIPGADDVMLNYQSTSF  
HDALYVREVLGLRRAPEFE EWLESMQITD-TRGALLNAPT GQPL--LE--GASE-----  
----WMGIA-----  
-----  
-----  
-----

>gi|91781403|ref|YP\_556609.1| ethanolamine ammonia-lyase heavy chain [Burkholderia xenovorans LB400]

-----MSYTETIGSRTY  
RF-----ADLKTLMKAS PQRS GD-----  
QLAGVAAASEEERVA AKMALAQVPLRTFLNE-----ALIPYESDEVTRLVIDDHSPQA  
FAEIAHLTVGDFRNLLSSTT---DADALTRIAAGLTPEMVA AVSKLMRNQDLIAAARKR  
PVITRFRNTVGLPGHMSVRLQPNHPTDDVKGIAASMLDGLMYGCGDAMIGINPASDNLAA  
ITRLLL MVDDFRQRYQVP--TQSCVL THVTNTIAAIEKG-APVDLVFQSIAGTEKANAGF  
GISLALLQEAYEAGLSLKRGT-----VGNNLMYFETGQGSAL SADAHFG-----VD  
QQTCEVRAYAVARKFNPF L-----VNTVVGFIGPEYLYDGKQITRAGLEDH  
FCGKLLGVPMGCDICYTNHAEADQDDMDNLLTLLGVAGINFIMGIPGADDVMLNYQSTSF  
HDALYVREVLGLRRAPEFE EWLESMQITD-ARGALLSASTQ QPL--LE--GAPD-----  
----WMGIA-----  
-----  
-----  
-----

>gi|134294258|ref|YP\_001117993.1| ethanolamine ammonia-lyase heavy chain [Burkholderia vietnamiensis G4]

-----MSYTETIGPRTY  
RF-----ADLKTLLAKASPLRSGD-----  
QLAGVAAASEEERVA AKIALASVPLKAF LNE-----AVIPYEQDEVTRLIVDDHDAQA  
FAEISHLTVGDFRNLLSPAA---DGAALERIA PGLTPEMVA AVSKLMRNQDLIAAARKR  
RVVTRFRNTVGLPGRMSVRLQPNHPTDDVKGIAASMLDGLMYGCGDAMIGINPATDSLAA

SupplementalMultipleSequenceAlign.txt

IVKLLAMIDGFRERYGVP--TQSCVLTHVTNTIAAIDKG-APVDLVFQSIAGTEKANASF  
GISLALLGEARAAALSLARGT-----VGNNVMYFETGQGSALSANAHF-----VD  
QQTCEVRAYAVARKFDPFL-----VNTVVGFIFGPEYLYDGKQIIRAGLEDH  
FCGKLLGVPMGCDICYTNHAEADQDDMDTLLTLLGAAGINFIMGIPGADDVMLNYQSTSF  
HDQLYVREVLGLRRAPEFEWLETMEIAD-AHGALRAANARVPL--LA--GAND-----  
----WMGISA-----  
-----  
-----  
-----

>gi|187922055|ref|YP\_001893697.1| Ethanolamine ammonia lyase large subunit  
[Burkholderia phytofirmans PsJN]

-----MSYTETIGTRTY  
RF-----ADLKTLLAKASPLRSGD-----  
QLAGVAAASEEERVAAKMALAQVPLRTFLNE-----ALIPYSEDEVTRLVIDDHSPQA  
FAEISHLTVGDFRNWLLSSTT---DADALTRISAGLTPEMVAAVSKLMRNQDLIAAARKR  
PVITRFRNTVGLPGHMSVRLQPNHPTDDVKGIAASMLDGLMYGCGDAMIGINPASDNLAA  
ITKLLMIDDFRQRYQVP--TQSCVLTHVTNTIAAIEKG-APVDLVFQSIAGTEKANAGF  
GISLALLQEAYEAGLSLKRGT-----VGNNLMYFETGQGSALSADAHF-----VD  
QQTCEVRAYAVARRFNPFL-----VNTVVGFIFGPEYLYDGKQIIRAGLEDH  
FCGKLLGVPMGCDICYTNHAEADQDDMDNLLTLLGVAGINFIMGIPGADDVMLNYQSTSF  
HDALYVRDVLGLRRAPEFEWLESMQITD-ARGALLSASTQQPL--LE--GARD-----  
----WMGIA-----  
-----  
-----  
-----

>gi|115350175|ref|YP\_772014.1| ethanolamine ammonia lyase large subunit  
[Burkholderia ambifaria AMMD]

-----MAYTETIGPRTY  
RF-----ADLKTLLAKASPLRSGD-----  
QLAGVAAASEEERVAAKIALAGVPLKAFLNE-----ALIPYEHDEVTRLILDHDA  
FAEISHLTVGDFRNWLLSPVA---DGAALERIAPGLTPEMVAAVSKLMRNQDLIAAARKR  
RVVTRFRNTVGLPGRMSVRLQPNHPTDDVKGIAASMLDGLMYGCGDAMIGINPATDSLAA  
IVKLLAMIDGFRERYGVP--TQSCVLTHVTNTIAAIEKG-APVDLVFQSIAGTEKANASF  
GISLALLGEAREAAALSLGRGT-----VGNNLMYFETGQGSALSANAHF-----VD  
QQTCEVRAYAVARKFDPFL-----VNTVVGFIFGPEYLYDGKQIIRAGLEDH  
FCGKLLGVPMGCDICYTNHAEADQDDMDTLLTLLGAAGINFIMGIPGADDVMLNYQSTSF  
HDQLYVREVLGLRRAPEFEWLETMEIAD-AHGALRVASARVPL--LA--GAND-----  
----WMGISA-----  
-----  
-----  
-----

>gi|183221860|ref|YP\_001839856.1| ethanolamine ammonia-lyase, heavy chain  
(ethanolamine ammonia-lyase large subunit) [Leptospira biflexa serovar Patoc strain  
'Patoc 1 (Paris)']

-----MSYQIVIGKTTY  
QF-----QDLKQVLAKASPLRSGD-----  
QLSGIAAADQKERIAAQMVLAADIYLSDFLNV-----ELIPSDIDEVTRLILTSHDKVS  
FQTISHLTVGGFRDFLLSETT---DAQVLESIRMALTPEMVAAVSKLMSNQLILVSQKI  
NIVTKFRNTIGLPGRLSVRLQPNHPTDDLKGIASILDGLILGSGDAVIGINPATDHIPT  
CITLLEMLDTIIQKYSIP--TQSCILTHVTTSMQVMQKG-APVDLVFQSIGGTEDLNKSF  
GINLSMLGEAREMALSLKRGT-----IGDHVMYFETGQGSALSAGAHHG-----ID  
QQTLEVRAYAVARKFSPLL-----VNTVVGFIFGPEYLYNGKQIIRAGLEDH  
FCGKLMGLPMGVDCICTNHADADQDDMDTLLTLLGVAGCNFIMGIPGADDVMLSQYQSTSF  
HDALYLRQVLGLRPTPEFEQWLLDFGIFSKGNFLPIENQMVVAL--FE--NGMR-----  
----I-----  
-----  
-----  
-----

>gi|170731498|ref|YP\_001763445.1| ethanolamine ammonia lyase large subunit

SupplementalMultipleSequenceAlign.txt

[Burkholderia cenocepacia MC0-3]

-----MSYTETIGPRTY  
RF-----ADLKTLLAKASPLRSGD-----  
QLAGVAAASEEERVAAKIALAGVPLKAFLNE-----AVIPYEDDEVTRLIIDDHDAQA  
FAEISHLTVGDFRNWLLSPAA---DGAALERIAPLTPEMVAAVSKLMRNQDLIAAARKR  
RVVTRFRNTVGLPGRMSVRLQPNHPTDDVKGIAASMLDGLMYGCGDAMIGINPATDSLAA  
IVKLLAMIDGFRERYGVP--TQSCVLTHVTNTIAAIEKG-APVDLVFQSIAGTEKANASF  
GISLALLAEAREAALAKRGT-----VGNNLMYFETGQGSALSANAHEFG-----VD  
QQTCEVRAYAVARKFEPFL-----VNTVVGFIGPEYLYDGKQIIRAGLEDH  
FCGKLLGVPMGCDICYTNHAEADQDDMDTLLTLLGAAGINFIMGIPGADDVMLNYQSTSF  
HDQLYVREVLGLRRAPEFEWLETMEIAD-AHGALRAATARVPL--LA--GAND-----  
----WMGISA-----  
-----  
-----  
-----

>gi|172059195|ref|YP\_001806847.1| ethanolamine ammonia lyase large subunit  
[Burkholderia ambifaria MC40-6]

-----MAYTETIGPRTY  
RF-----ADLKTLLAKASPLRSGD-----  
QLAGVAAASEEERVAAKIALAGVPLKAFLNE-----ALIAIYEDDEVTRLIIDDHDAQA  
FAEISHLTVGDFRNWLLSPVA---DGAALERIAPLTPEMVAAVSKLMRNQDLIAAARKR  
RVVTRFRNTVGLAGRMSVRLQPNHPTDDVKGIAASMLDGLMYGCGDAMIGINPATDSLAA  
IVKLLAMIDGFRERYGVP--TQSCVLTHVTNTIAAIEKG-APVDLVFQSIAGTEKANASF  
GISLALLGEAREAALSLGRGT-----VGNNLMYFETGQGSALSANAHEFG-----VD  
QQTCEVRAYAVARKFDPFL-----VNTVVGFIGPEYLYDGKQIIRAGLEDH  
FCGKLLGVPMGCDICYTNHAEADQDDMDTLLTLLGAAGINFIMGIPGADDVMLNYQSTSF  
HDQLYVREVLGLRRAPEFEWLETMEIAD-AHGALRVASARVPL--LA--GAND-----  
----WMGISA-----  
-----  
-----  
-----

>gi|76809343|ref|YP\_331557.1| ethanolamine ammonia-lyase, large subunit  
[Burkholderia pseudomallei 1710b]

-----MRYTETIGSRTY  
RF-----ADLKTLLAKASPLRSGD-----  
QLAGVAAATEEERVAAKMALASAPLTAFLNE-----AVIPYEDDEVTRLVVDTHSRDA  
FAEISHLTVGDFRNWLLSPAA---DAAALERIAPLTPEMVAAVSKLMRNQDLIAAARKR  
RVVTRFRNTVGLPGRMSVRLQPNHPTDDVKGIAASMLDGLMYGCGDAMIGINPATDSLAA  
ITKLLAMIDAFRERYRVP--TQSCVLTHVTNTIAAIGKG-APVDLVFQSIAGTEKANASF  
GISLALLAEAREAALAKRGT-----VGNNLMYFETGQGSALSANAHHG-----VD  
QQTCEVRAYAVARAFEPFL-----VNTVVGFIGPEYLYDGKQIIRAGLEDH  
FCGKLLGVPMGCDICYTNHAQADQDDMDNLLTLLGAAGINFIMGIPGADDVMLNYQSTSF  
HDQLYVREVLGLRRAPEFEWLETMEITD-AHGALRAASARVPL--LA--GAND-----  
----WMGRCA-----  
-----  
-----  
-----

>gi|78064786|ref|YP\_367555.1| ethanolamine ammonia-lyase heavy chain [Burkholderia  
sp. 383]

-----MSYTETIGPRTY  
RF-----ADLKTLLAKASPLRSGD-----  
QLAGVAAASEEERVAAKIALAGVPLKAFLSE-----AVIPYEDDEVTRLIVDDHDAQA  
FAEISHLTVGDFRNWLLSPAA---DCAALERIAPLTPEMVAAVSKLMRNQDLIAAARKR  
RVVTRFRNTVGLPGRMSVRLQPNHPTDDVKGIAASMLDGLMYGCGDAMIGINPATDSLAA  
IVKLLAMIDGFRERYGVP--TQSCVLTHVTNTIAAVEKG-APVDLVFQSIAGTEKANASF  
GISLALLGEAREAALSLKRG-----VGNNLMYFETGQGSALSANAHEFG-----VD  
QQTCEVRAYAVARKFEPFL-----VNTVVGFIGPEYLYDGKQIIRAGLEDH  
FCGKLLGVPMGCDICYTNHAEADSDMDTLLTLLGAAGINFIMGIPGADDVMLNYQSTSF  
HDQLYVREVLGLRRAPEFEWLETMEIAD-AHGALRAATSRVPL--LA--GAND-----  
----WMGISA-----  
-----  
-----  
-----

SupplementalMultipleSequenceAlign.txt

>gi|83719390|ref|YP\_443774.1| ethanolamine ammonia-lyase, large subunit  
[Burkholderia thailandensis E264]

-----MRYTETIGSRTY  
RF-----ADLKTLLAKASPLRSGD-----  
QLAGVAAATEEERVAAKMALASVPLAAFLNE-----AVIPYEDDEVTRLVVDTHSRDA  
FAEISHLTVGDFRNWLLSPAA---DAAALERIASGLTPEMVAAVSKLMRNQDLIAAARKR  
RVVTRFRNTVGLPGRMSVRLQPNHPTDDVKGIAASMLDGLMYGCGDAMIGINPATDSLAA  
ITKLLAMIDAFRERYRVP--TQSCVLTHVTNTIAAIEKG-APVDLVFQSIAGTEKANASF  
GISLALLAEARDAALALKRGT-----VGDNLMYFETGQGSALSANAHHS-----VD  
QQTCEVRAYAVARVFEPFL-----VNTVVGFIFGPEYLYDGKQIIRAGLEDH  
FCGKLLGVPMGCDICYTNHAQADQDDMDNLLTLLGAAGINFIMGIPGADDVMLNYQSTSF  
HDQLYVREVLGLRRAPEFEWLEAMEIAD-AHGALRAASARVPL--LA--GAND-----  
----WMGLSA-----

>gi|107024468|ref|YP\_622795.1| ethanolamine ammonia lyase large subunit  
[Burkholderia cenocepacia AU 1054]

-----MSYTETIGPRTY  
RF-----ADLKTLLAKASPLRSGD-----  
QLAGVAAASEEERVAAKIALAGVPLKAFLNE-----AVIPYEDDEVTRLIIDDHDAQA  
FAEISHLTVGDFRNWLLSPAA---DGAALERIAPGLTPEMVAAVSKLMRNQDLIAAARKR  
RVVTRFRNTVGLAGRMSVRLQPNHPTDDVKGIAASMLDGLMYGCGDAMIGINPATDSLAA  
IVKLLAMIDGFRERYGVP--TQSCVLTHVTNTIAAIEKG-APVDLVFQSIAGTEKANASF  
GISLALLGEAREAAALALKRGT-----VGNNLMYFETGQGSALSANAHFG-----VD  
QQTCEVRAYAVARKFEPFL-----VNTVVGFIFGPEYLYDGKQIIRAGLEDH  
FCGKLLGVPMGCDICYTNHAQADQDDMDTLLTLLGAAGINFIMGIPGADDVMLNYQSTSF  
HDQLYVREVLGLRRAPEFEWLETMEIAD-AHGALRAATARVPL--LA--GAND-----  
----WMGISA-----

>gi|53720981|ref|YP\_109967.1| ethanolamine ammonia-lyase heavy chain [Burkholderia  
pseudomallei k96243]

-----MRYTETIGSRTY  
RF-----ADLKTLLAKASPLRSGD-----  
QLAGVAASTEERVAAKMALASAPLTAFLNE-----AVIPYEDDEVTRLVVDTHSRDA  
FAEISHLTVGDFRNWLLSPAA---DAAALERIAPGLTPEMVAAVSKLMRNQDLIAAARKR  
RVVTRFRNTVGLPGRMSVRLQPNHPTDDVKGIAASMLDGLMYGCGDAMIGINPATDSLAA  
ITKLLAMIDAFRERYRVP--TQSCVLTHVTNTIAAIDKG-APVDLVFQSIAGTEKANASF  
GISLALLAEAREAAALALKRGT-----VGNNLMYFETGQGSALSANAHHG-----VD  
QQTCEVRAYAVARAFEPFL-----VNTVVGFIFGPEYLYDGKQIIRAGLEDH  
FCGKLLGVPMGCDICYTNHAQADQDDMDNLLTLLGAAGINFIMGIPGADDVMLNYQSTSF  
HDQLYVREVLGLRRAPEFEWLETMEITD-AHGALRAASARVPL--LA--GAND-----  
----WMGRCA-----

>gi|126455070|ref|YP\_001068230.1| ethanolamine ammonia-lyase, large subunit  
[Burkholderia pseudomallei 1106a]

-----MRYTETIGSRTY  
RF-----ADLKTLLAKASPLRSGD-----  
QLAGVAASTEERVAAKMALASAPLTAFLNE-----AVIPYEDDEVTRLVVDTHSRDA  
FAEISHLTVGDFRNWLLSPAA---DAAALERIAPGLTPEMVAAVSKLMRNQDLIAAARKR  
RVVTRFRNTVGLPGRMSVRLQPNHPTDDVKGIAASMLDGLMYGCGDAMIGINPATDSLAA  
ITKLLAMIDAFRERYRVP--TQSCVLTHVTNTIAAIGKG-APVDLVFQSIAGTEKANASF

SupplementalMultipleSequenceAlign.txt

GISLALLAEAREAALALKRGT-----VGNNLMYFETGQGSALSANAHHG-----VD  
QQTCEVRAYAVARAFEPFL-----VNTVVGFIGPEYLYDGKQIIRAGLEDH  
FCGKLLGVPMGCDICYTNHAQADQDDMDNLLTLLGAAGINFIMGIPGADDVMLNYQSTS  
FDQLYVREVLGLRRAPEFEWLETMEITD-AHGALRAASARVPL--LA--GAND-----  
-----WMGRCA-----  
-----  
-----

>gi|206558463|ref|YP\_002229223.1| ethanolamine ammonia-lyase heavy chain  
[Burkholderia cenocepacia J2315]

-----MSYTETIGPRTY  
RF-----ADLKTLLAKASPLRSGD-----  
QLAGVAAASEEERVAAKIALAGVPLKAFLNE-----AVIPYEDDEVTRLIIDDHDAQA  
FADISHLTVGDFRNWLLSPAA---DGAALERIAPLTPEMVAASVSKLMRNQDLIAAARKR  
RVVTRFRNTVGLAGRMSVRLQPNHPTDDVKGIAASMLDGLMYGCGDAMIGINPATDSLAA  
IVKLLAMIDGFRERYGVP--TQSCVLTHVTNTIAAIEKG-APVDLVFQSIAGTEKANASF  
GISLALLGEAREAALALKRGT-----VGNNLMYFETGQGSALSANAHFG-----VD  
QQTCEVRAYAVARKFEPFL-----VNTVVGFIGPEYLYDGKQIIRAGLEDH  
FCGKLLGVPMGCDICYTNHAEADQDDMDTLLTLLGAAGINFIMGIPGADDVMLNYQSTS  
FDQLYVREVLGLRRAPEFEWLETMEIAD-AHGALRAATARVPL--LA--GAND-----  
-----WMGVSA-----  
-----  
-----

>gi|161523307|ref|YP\_001578319.1| ethanolamine ammonia lyase large subunit  
[Burkholderia multivorans ATCC 17616]

-----MSYTETIGSRTY  
RF-----ADLKTLLAKASPLRSGD-----  
QLAGVAAASEEERVAAKIALAGVPLRAFLNE-----AVIPYEADEVTRLIVDDHDAHA  
FAEIAHLTVGDFRNWLLSPAA---DGAALERIAPLTPEMVAASVSKLMRNQDLIAAARKR  
RVVTRFRNTVGLPGRMSVRLQPNHPTDDVKGIAASMLDGLMYGCGDAMIGINPATDSLAA  
IVKLLAMIDAFRERYRVP--TQSCVLTHVTNTIAAIEKG-APVDLVFQSIAGTEQANASF  
GISLALLAEAREAALSLKRGD-----VGDNLMYFETGQGSALSANAHHG-----VD  
QQTCEVRAYAVARKFEPFL-----VNTVVGFIGPEYLYDGKQIIRAGLEDH  
FCGKLLGVPMGCDICYTNHAEADQDDMDNLLTLLGAAGINFIMGIPGADDVMLNYQSTS  
FDQLYVREVLGLRRAPEFEWLETMEIAD-AHGVLRTATSRVPL--LA--GAND-----  
-----WMGLSA-----  
-----  
-----

>gi|116622922|ref|YP\_825078.1| ethanolamine ammonia-lyase heavy chain [Solibacter  
usitatus Ellin6076]

-----MTLRELLGKASPARSGD-----  
ELAGVAARTAEEERVAQMALADVPLKILAD-----PVVPYESDEVTRLICDSHDAHA  
FAPVAHLTVGGLRDWLLSEQA---ATPVLAALAPGITPEMAAASVSKLMRVQDLITVAAC  
RVVTRFRSTIGLAGRMSTRQPNHPTDDLKGAASILDGLSLGSGDAVIGVNPASDNVAG  
LEAMLHMLDRIRERYQIP--TQTCVLAHVTTQMEAMRMG-APVDLVFQSIAGTEAANASF  
GITLAMLDEAHAARELNREG-----NVMYFETGQGSALSANAHHG-----VD  
QQTCEARAYAVARRYRPLL-----VNTVVGFIGPEYLYNGKQIQRAGLEDH  
FCGKLLGLPMGCDICYTNHAEADQDDMDTLLTLLAAAGCTYIMGVPGADDVMLNYQSTS  
FDALYVRQLLGLRPAPEFEAWLER-----RPEIAAASW--LL--T-----  
-----  
-----

>gi|126440450|ref|YP\_001060932.1| ethanolamine ammonia-lyase, large subunit  
[Burkholderia pseudomallei 668]

-----MRYTETIGSRTY

SupplementalMultipleSequenceAlign.txt

RF-----ADLKTLLAKASPLRSGD-----  
QLAGVAAATEEERVAAKMALASAPLTAFLNE-----AVIPYEDDEVTRLVVDTHSRDA  
FAEISHLTVGDFRNWLLSPAA---DAAALERIAPLGTPEMVAASVKLMRNQDLIAAARKR  
RVVTRFRNTVGLPGRMSVRLQPNHPTDDVKGIAASMLDGLMYGCGDAMIGINPATDSLAA  
ITKLLAMIDAFRERYRVP--TQSCVLTHVTNTIAAIDKG-APVDLVFQSIAGTEKANASF  
GISLALLAEAREAAALAKRGT-----VGNLMMYFETGQGSALSANAHHG-----VD  
QQTCEVRAYAVARAFEPFL-----VNTVVGFIFGPEYLYDGKQIIRAGLEDH  
FCGKLLGVPMGCDICYTNHAQADQDDMDTLLTLLGAAGINFIMGIPGADDVMLNYQSTS  
HDQLYVREVLGLRRAPEFEWLETMEITD-AHGALRAASARVPL--LA--GAND-----  
----WMGRCA-----  
-----  
-----

>gi|120555851|ref|YP\_960202.1| ethanolamine ammonia lyase large subunit  
[Marinobacter aquaeolei VT8]

-----MSGQYTYRMGFQTM  
DF-----RDLGTLMAKATPERSGD-----  
HLAGVGAASAEERVLAQMCLADLPLKTFLTD-----ALIPYETDEVTRLIMSDHDATA  
FAPVSHLTVGDFRNWLLSDNA---SPEMLARLRPGLTPEMVAASVKLMRNQDLILVAQKC  
QITTAFRNTVGLPGRMSTRLQPNHPTDDMAGIAASILDGLLYGNGDAVIGINPATDNVAQ  
TKRLLTMVDEVIQRYDIP--TQSCVLTHVTNTLEAIEQG-APVDLVFQSIGGTEATNQS  
GFNLATLKEAQEAALSLKRGSE-----VGQNVMYFETGQGSALSANAHHG-----LD  
QQTCEARAYAVARHFDPFL-----VNTVVGFIFGPEYLYDGKQITRAGLEDH  
FCGKLLGLPMGCDICYTNHAQADQDDMDNLLTLLGVAGCTFIMGIPGSDDIMLNYQTTSF  
HDALYARRVNLKPAPEFEQWLHAMQIFE-DSDPVSLNNDIPAA--FR--HSLSE-----  
-GPRRRA-----  
-----  
-----

>gi|109897749|ref|YP\_661004.1| ethanolamine ammonia lyase large subunit  
[Pseudoalteromonas atlantica T6c]

-----MSQGYRHTVGGTTY  
QF-----TSLAQLMAKATPLRSGD-----  
ILAGVAAETEQERVAAQFTLADVALTDFLNE-----ALVPYESDEVTRLIVDNHNKEA  
FAPLAHLTIGDFRNWLLSDFA---TSEVLASVCAGITPEMAAAVCKIMRNQDLILVAKKC  
QVTTAFRNTIGLPNRLSTRLQPNHPTDDINGIAASMLDGLLYGNGDAVIGINPATDNVTQ  
ATHLLHLMDDVIQYQIP--TQSCVLTHVTNTIECIEAD-APVDLVFQSIGGTQATNSSF  
GFDLSTLAEAHAAALSLGRGT-----AGTNVMYFETGQGSALSANGHHG-----LD  
QQTCEARAYAVARKFNPLL-----VNTVVGFIFGPEYLYDGKQITRAGLEDH  
FCGKLLGLPMGCDVCYTNHAQADQDDMDNLLTLLGVAGCSFIMGIPGSDDIMLNYQTTSF  
HDALYLRVIGARPAPEFEMWLEKMNIMK-NDGQYILSDHVPDV--FA--RSLK-----  
----ALRGRS-----  
-----  
-----

>gi|34496640|ref|NP\_900855.1| ethanolamine ammonia-lyase heavy chain  
[Chromobacterium violaceum ATCC 12472]

-----MSHAIAIGPTY  
RF-----ADLKTLLARASPLRSGD-----  
QLAGVAAASAEERVAQMCLADLPLKVFLNQ-----AVIPYEEDEVTRLILDSDHQAA  
FAAVSHLTVGGLRDWLLSDAA---TAETLAALAPGLTPEMAAAVSKLMRNQDLVLAARKC  
RVVTAFRNTQGLPGRMGVRLQPNHPADDARAIAAATLDGLLYGAGDAVIGINPAGDSPDD  
IRSLTLLDEVQRQYAIIP--TQSCVLTHVTSTLDMRRG-APVDLVFQSIAGTQKANAGF  
GVSLAVLDEAHQAARELKRGT-----VGDNVMYFETGQGSALSANAHWG-----VD  
QQTCEARAYAVARRYSPLL-----VNTVVGFIFGPEYLYNGKQIIRAGLEDH  
FCGKLLGLPMGCDICYTNHAQADQDDMDALLTLLGAAGVHFIIIGVPGADDIMLGYQSTS  
HDALYLRNVLGLKRAPEFEDWLETMEITR--GGRLLPQDRRQRL LAMM--EGVA-----  
-----  
-----



SupplementalMultipleSequenceAlign.txt

>gi|171059482|ref|YP\_001791831.1| ethanolamine ammonia lyase large subunit [Leptothrix cholodnii SP-6]

-----MSYAHTIGSRRY  
TF-----DDLRTLLARASPARSGD-----  
RLAGVSAASAQERVAQMALADLPLTTFLHE-----AVVPYEDDEVTRLIVDHHDA  
FAPVSHLTVGDLRNWLLGDAA---DGASLAALAPGLTPEMVAASVSKLRLQDLMLIAHKC  
TVVTRFRGTIGLPGRLATRLQPNHPTDDASGIAASLLDGLLHGSGDAVIGINPATDNL  
VMRILQMLDGVISRYGIP--TQSCVLTHVTNTLQAIERG-APVDLVFQSIGGTEATNRSF  
GIDLAVLGEARAAALSLRRGAVFDDGHGSTMGDVNMVYFETGQGSALSAGANHG-----CD  
QQTIEARAYAVARHFKPLL-----VNTVVGFIGPEYLFDGKQIIRAGLEDH  
FCAKLLGLPMGCDVCYTNHAEADSDDMDALLTMLCAAGCSFIMGIPGSDDIMLNYQSTSF  
HDALVMRQLMGRRAAPEFEAWLQRMGVFE-AGVRSRLADTLAP--FA--SVLR-----  
----RLEAA-----

>gi|89899397|ref|YP\_521868.1| ethanolamine ammonia lyase large subunit [Rhodoferrax ferrireducens T118]

-----MQTHQYTHSVGATTY  
SF-----RDLKDLMAKATPERSGD-----  
LLAGVAAHSAQERVVAQMALAEVPLKTFLE-----VLVPYEDDEITRLIIDSHDATA  
FAPVSHLTVGDFRNWLLGDEV---DSAVLTALAPGITPEMAAAVSKIMRNQDLILVAKKC  
RVVTKFRNTIGLPGMATRLQPNHPTDDATGIAASLLDGLLYGSGDAVIGINPATDNVPQ  
VIKLVMTMSDIIQQYEIP--TQSCVLTHVTNTIEAINRG-APVDLVFQSIGGTEATNRSF  
GVSLDLLGQARSAALSLKRGT-----VGDVNMVYFETGQGSALSANAHHG-----VD  
QQTCEARAYAVARHFKPLL-----VNTVVGFIGPEYLFDGKQIIRAGLEDH  
FCAKLLGLPMGCDVCYTNHAEADQNDMDVLLTLLGVAGCSFVMGIPGSDDIMLNYQTTSF  
HDALYVRRVLGLKPAPEFEAWLQKMQIFS-RDAQFRLNPALPPA--FQ--RALL-----  
----RLA-----

>gi|218886350|ref|YP\_002435671.1| Ethanolamine ammonia lyase large subunit [Desulfovibrio vulgaris str. 'Miyazaki F']

-----MN  
VH-----SPLRELLAKASPLRSGD-----  
VLAGVAAASDEERVRAQMLLADVPLKRFLDE-----AVIPYEDDEITRLIMDSHDA  
FAPVRSYTVGQFRDWLLTGAA---DHASLAALAPGLTPEMVAASVSKLRLQDLVLVASRC  
RVVTRFRNTIGLPGHFSARLQPNHPTDDARGILASTIDGLLYGSGDAVIGINPASDSLEN  
IARLMHLLDELIARYEIP--TQGCVLTHVTSAMELIRRG-TPLDLCFQSIAGTEKANASF  
GISLGLLDEAWQATLELQRT-----LGDVNMVYFETGQGSALSANAHHG-----VD  
QQTVECRAYAVARRYPRL-----VNTVVGFIGPEYLYNGKQIIRAGLEDH  
CCGKLLGLPMGVDICYTNHADADQDDMDALLTLLGTAGCNFIMGVPGADDIMLNYQSTSF  
HDAAYLRKLLGRRPAPEFEAWLERMGIHD-RDGNLLAPGGALLG--LE--QRVR-----  
----QDA-----

>gi|121605520|ref|YP\_982849.1| ethanolamine ammonia lyase large subunit [Polaromonas naphthalenivorans CJ2]

-----MKRHQYHTAGCRTY  
GF-----HDLKDLMAKATPARSGD-----  
LLAGVAAHSAEERAVAQMALAEVPLATFLKE-----ALIPYERDEITRLIIDTHDAPA  
FAPVSHLTVGDFRNWLLGDAV---DSEALAALAPGITPEMAAAVAKLMRNQDLILVAKKC  
RVVTRFRNTLGLAGRLATRLQPNHPTDDASGIAASLLDGLLYGSGDAVIGINPATDNVPQ  
VIRLVTMLNDIISQYAI--TQSCVLTHVTNTIEAINRG-APVDLVFQSIGGTEATNRSF  
GVSLDLLGEARSAALSLNRGT-----LGDVNMVYFETGQGSALSANANFG-----ID  
QQTCEARAYAVARQFKPLL-----VNTVVGFIGPEYLFDGKQIIRAGLEDH

SupplementalMultipleSequenceAlign.txt

FCAKLLGLPMGCDVCYTNHAEADQNDMDVLLTLLSVAGCNFVMGIPGSDDIMLNYQTTSF  
HDALYARRVLGLRPAPEFEAWLQKMDIFS-KDAQFRLNPSLPPA--FH--KALL-----  
-----RLP-----  
-----  
-----  
-----

>gi|119944061|ref|YP\_941741.1| ethanolamine ammonia lyase large subunit  
[Psychromonas ingrahamii 37]

-----MANYRYQLGSHVY  
QF-----ASLADVMAKASPLRSGD-----  
QLAGVAALSSEQRVVAQMLLADMPLKDFLQE-----MLIPYESDEITRLIIDEHDSGA  
FAEIAHLTVGDFRNWLLKETT---TAVELARVRSGITPEMAAAVSKIMRNQDLILVAKKC  
HIITQFRNTIGLSGHLSTRLQPNHPTDDVNGIAASLFDGLMYGNGDAVIGINPATDNVQQ  
AVKLMKLMDDVIQHYEIP--TQSCVLTHVTNTIEAIELG-APVDLVFQSIGGTEATNQQF  
GINLNLVNEAHQAAL ELKRG T-----VGNNLMYFETGQGSALSANGHHN-----ID  
QQTCEARAYAVARKFNPLL-----VNTVVGFIGPEYLFDGKQIIRAGLEDH  
FCGKLLGLPMGCDICYTNHAYADQNDMDNLLTLLGVAECSFIMGIPGSDDIMLNYQTTSF  
HDALYARQVLGLRPAPEFDQWLKKNMISS-ADNRFQLSDQLPAS--FA--HPLE-----  
-----MIKEAL-----  
-----  
-----  
-----

>gi|146283993|ref|YP\_001174146.1| ethanolamine ammonia-lyase large subunit  
[Pseudomonas stutzeri A1501]

-----MTYSHSVGGTTW  
RF-----DDLREVMKASPARSGD-----  
LLAGVAAGSDAERVAAQMCLADVPLRRFLEE-----ALIPYESDEVTRLIIDSHDAAA  
FAPISHLTVGDFRNWLLGEEA---DESSLKALAPGLTPEMVAAVSKIMRVQDLILVAQKV  
RVVTRFRNSIGLAGRMSTRLQPNHPTDDGAGIAASILDGLLYGNGDAVIGINPATDSTAG  
ICELLKMLDAVISRYEIP--TQGCILTHVTTTIEAINRG-APLDLVFQSIAGTEAANASF  
GINLSTLQEGYEAGLSQKRG T-----LGDNLMYFETGQGSALSANAHHG-----VD  
QQTCEARAYAVARRYKPLL-----VNTVVGFIGPEYLYNGKQIIRAGLEDH  
FCGKLLGVPMGCDICYTNHAEADQDDMDMLL TLLGTAGINFIMGIPGSDDVMLNYQTTSF  
HDALYVRQVLGLRPAPEFEWLAKMQILRQDGNRLQLGRDLPEA--FR--RALE-----  
-----QQA-----  
-----  
-----  
-----

>gi|17547846|ref|NP\_521248.1| putative ethanolamine ammonia-lyase heavy chain  
protein [Ralstonia solanacearum GMI1000]

-----MARFSHTLGHETY  
RF-----DNLRDVLAKASPARSGD-----  
ALAGIAAASAAERVAAQMALAEIPLRHFLDE-----AVIPYEADEVTRLIVDTHDAAA  
FAPVSHLTVGDFRDWLLGDAA---DEAALAALAPGLTPEMAAAVSKLMRVQDLILVAQKT  
RVVTRFRNTIGLRGRMATRLQPNHPTDDPAGIAASLLDGLMYGSGDAVIGVNPVSDSTAA  
ICDLLGMLDAVIRRYDIP--TQACVLTHVTTTLEAIRRG-MPVDLVFQSIAGTEAANASF  
GVSLALLHEARDAALGLQRGT-----VGDNVMYFETGQGSALSANAHHG-----VD  
QQTCEARAYAVARRFRPLL-----VNTVVGFIGPEYLYDGKQILRAGLEDH  
FCGKLLGVPMGCDICYTNHAEADQDDMDTLL TLLGAAGVNYIMGIPGSDDVMLNYQTTSF  
HDALYVRRVLGLRPAPEFEDWLARMGICTAGDGRIALADGLPDP--FR--RAVA-----  
-----QLA-----  
-----  
-----  
-----

>gi|110639427|ref|YP\_679636.1| ethanolamine ammonia-lyase heavy chain [Cytophaga  
hutchinsonii ATCC 33406]

-----MYKHTVSQHVF  
TF-----DSLTELMAKASPLRSGD-----  
QLAGIAAGSYQERIAAQMALADLPLTTFLQE-----PLIPYESDEVTRLIFDTHEHTA

SupplementalMultipleSequenceAlign.txt

FTAIAHLTVGDFRNFLSNNT---HTSQLTALQKAITPEMAAAVSKIMNVQDLILVSSKC  
EIITRFRNTIGVKGCMSTRLQPNHPTDDLKAIMASVLDGLFYGSGDAVIGINPATDHIST  
QVQLLKLIDAVREQYAIP--TQSCILSHITNTILAEQG-APVDLVFQSIGGTEKTNSSF  
GINLSLLQEGYEAAALSLGRGT-----IGNNVMYFETGQGSLSANAHYG-----ID  
QQTLEARAYAVARAFNPLL-----VNTVVGFIGPEYLFDGKQIIRAGLEDH  
FCGKLMGLPMGCDICYTNHADADQDDMDALLTLLGVAGCNFIMGVPGSDDIMLNYQSTS  
FDALYIRKLLNVKPAPEFEWLLKMGIMN-TQHEITV-----HR--IYCG-----  
-----  
-----  
-----  
-----

>gi|170719781|ref|YP\_001747469.1| ethanolamine ammonia lyase large subunit  
[Pseudomonas putida w619]

-----MASFVHTVGHLVY  
RF-----DSLKEVMKASPARSGD-----  
YLAGVAAVNDGERVAAQMALANIPLSHFLSE-----ALIPYEQDEVTRLIIDTHDAQA  
FAPVSHLTVGGLRDWLLSDEA---NEDSLHALAPGLTPEMAAAVSKIMRVQDLVLVAQKI  
RVVTRFRGTMGLRGRLLSTRLQPNHPTDEPAGIAASILDGLLYGNGDAMIGINPATDSIAS  
ICAMLEMLDAIIQRYDIP--TQACVLTHVTTISIEAINRG-VPLDLVFQSIAGTEAANAGF  
GINLNVLQEGYEAGLSLKRGT-----LGQNLMYFETGQGSALSANAHHG-----VD  
QQTCE TRAYAVARHF KPFL-----VNTVVGFIGPEYLYNGKQIIRAGLEDH  
FCGKLLGVPMGCDICYTNHAEADQDDMDTLLTLLGVAGINFIMGIPGSDDIMLNYQTTSF  
HDALYARQTLGLKPGPEFEAWLQRTGIFTQADGRVRFQDNLPPA--FR--QALA-----  
----QLA-----  
-----  
-----  
-----

>gi|167647493|ref|YP\_001685156.1| ethanolamine ammonia lyase large subunit  
[Caulobacter sp. K31]

-----MAYSATLGSSTW  
TF-----ETLADLLAKASPLRSGD-----  
VLAGLAATSAAQNVAAKMALADLPLKTFLTQ-----ALVPYETDEVTRLILDGHDAQA  
FAPVASLTVGEFRDWLLSEIA---TPAALARLAPGLTPEMVAAVSKLMRNQDLILAASKC  
KVTTFRFRDTIGLPGTMAVRLQPNHPTDDPAGITASILDGLLYGCGDAVIGINPASDSLTV  
LGDTRLMDLLIQRFEIP--TQSCVLTHVTTAIQLIERG-APVDLVFQSIAGTESANASF  
GVTLALLKEGLDAGRSLNRGT-----VGDNVMYFETGQGSALSAGAHHG-----VD  
QQTLEARAYGVARAFEPLL-----VNTVVGFIGPEYLYDGKQIIRAGLEDH  
FCGKLLGAPLGVDCYTNHAEADQDDMDSLLTLLATAGVTFIMGVPGADDVMLNYQSTS  
FDALYVRELLGLKRAPEFEAWLQRLRIVG-ADGRLAPRAAGHPL--LT--AGVSG-----  
-----  
-----  
-----

>gi|206577600|ref|YP\_002240182.1| putative ethanolamine ammonia-lyase, large subunit  
[Klebsiella pneumoniae 342]

-----MYKTTLSGQVW  
RF-----DSLKTLMAKASPARSGD-----  
ALAGVIATSAEERMAAKMALAEVPLTDILDN-----PLIPYEQDEVTRLIIDTHDAQG  
FAALRHLTVGDFRDWLLDDAT---DTATLQRVARAITPEMAAAVSKLMRNQDLILAASKC  
QVVTRFRNTIGLPGHLSVRLQPNHPTDDLKGAASMLDGLLYGAGDAVIGINPASDSL  
LAQLNVMLDDIIQRFAIP--TQSCILTHVTNTLQLIERG-APVDLVFQSVAGTEAANSF  
GINLAMLQEAAREALSRRGT-----LGNNVMYFETGQGSCLSANAHHG-----VD  
QQTCEARAYAVARHFEPFL-----VNTVVGFIGPEYLYDGKQIIRAGLEDH  
FCGKLMGLPIGCDVCYTNHAEADQDDMDTLLTLLCTAGLTFLIGVPGADDIMLNYQSTS  
FDALYARRLLGLKHAPEFADWLAKMQIID-PHGTLRLTDARHPL--LS--VLPQASV--  
-----  
-----  
-----

SupplementalMultipleSequenceAlign.txt

>gi|182677067|ref|YP\_001831213.1| ethanolamine ammonia lyase large subunit [Beijerinckia indica subsp. indica ATCC 9039]

-----MPYSSTIAGTHY  
CF-----PDLRLLARASPLRAGD-----  
RLAGLTADTDAERVAARMTLADLPLKTFLE-----PLIPYEQDEVTRLIVDTHDAEA  
FAPVAAMTVGEFRDFLLSDAT---TTESLAKLAPGLTPEMAAAVSKLMRNQDLIAVARKI  
SVITHFRTTIIGLPGRLSVRLQPNHPSDDLIGASILDGLLYGCGDACIGINPATDSAAQ  
ALTLQRIEELRLRFDIP--IQACVLAHVTTTLDVIAQG-GPVDLVFQSIAGSEANRAF  
GVDLPLLDEAHA AVRGLNRAD-----ASANLLYFETGQGSALSSDAHVD-----VD  
QQTMEARAYAVARRYSPLL-----VNTVVGFIGPEYLYDGKEIIRAGLEDH  
FCGKLLGLPMGVDVCYTNHAEADSDMDNMTLLGVAGCTYIMGVPGADDIMLGYQSTS  
HDALYLRVSLGLKPAPEFEAWLLKMGIMD-SQSRIRPALQAQKL--LA--AFP-----  
-----  
-----  
-----  
-----

>gi|124267603|ref|YP\_001021607.1| ethanolamine ammonia-lyase heavy chain [Methylibium petroleiphilum PM1]

-----MAYAHSIGPRRY  
SF-----DDLRTL MARASPARSGD-----  
ELAGVAARSSEERAAAQIALAALPLKTFLEND-----ALVPYEDDEVTRLILDSQDAAA  
FAPIAHLTVGDLRDWLLSDAV---DGDTRLAAAPGLTPEMTAAVSKIMRNQDLILVARKC  
RVTRFRDRTIIGLPGRLSVRLQPNHPTDNAAGIAASTLDGLLYGSGDAVIGINPATDNVAQ  
VTRLLQMLDAVIQRYEIP--TQSCVLTHVTNTLQCIERG-APVDLVFQSIGGTEATNRSF  
GIDLALLAEAHDAALSLQRGA--LFSDDGQRGRNVMYFETGQGSALSAQAHHG-----CD  
QQTIEARAYAVARRFEPLL-----VNSVVGFIGPEYLYDGKQIIRAGLEDH  
FCAKLLGLPMGCDICYTNHAEADQNDMDVLLTLLGVAGCSFIMGIPGSDVMLNYQTTSF  
HDALYARRVGLRPAPEFERWLEAMRITE-PGAPDRLTDLMPA--LA--RLLE-----  
----HPR-----  
-----  
-----  
-----

>gi|167031604|ref|YP\_001666835.1| ethanolamine ammonia lyase large subunit [Pseudomonas putida GB-1]

-----MASFVHTVGHLVY  
RF-----DSLKDVMKASPARSGD-----  
YLAGVAASNDGERVAAQMALANIPLTHFLNE-----ALIPYEDDEVTRLIVDTHDAQA  
FAPVSHLTVGGLRDWLLSEEA---NEDSLRALAPGLTPEMAAAVSKIMRVQDLVLVAQKI  
RVVTRFRGTMLGRGLSTRLQPNHPTDEPAGIAASILDGLLYGNGDAMIGINPATDSIAS  
ICALLEMLDAIIQRYDIP--TQSCVLTHVTTTIEAINRG-VPLDLVFQSIAGTEAANAGF  
GINLNVLQEGYEAGLSLKRGT-----LGQNLMYFETGQGSALSANAHHG-----VD  
QQTCE TRAYAVARHF KPFL-----VNTVVGFIGPEYLYNGKQIIRAGLEDH  
FCGKLLGVPMGCDICYTNHAEADQDDMDTLLTLLGVAGINFIMGIPGSDDIMLNYQTTSF  
HDALYARQTLGLKPGPEFEAWLARTGIFTQADGRVRFQDNLPPA--FR--QALA-----  
----QLA-----  
-----  
-----  
-----

>gi|26987281|ref|NP\_742706.1| ethanolamine ammonia lyase large subunit [Pseudomonas putida KT2440]

-----MASFVHTVGHLVY  
RF-----DSLKEVMKASPARSGD-----  
CLAGVAASNDAERVAAQMALANIPLTHFLNE-----ALIPYEADDEVTRLIIDTHDAQA  
FAPVSHLTVGGLRDWLLSEEA---NEDSLRALAPGLTPEMAAAVSKIMRVQDLVLVAQKI  
RVVTRFRGTMLGRGLSTRLQPNHPTDEPAGIAASILDGLLYGNGDAMIGINPATDSIAS  
ICALLEMLDAIIQRYDIP--TQSCVLTHVTTTIEAINRG-VPLDLVFQSIAGTEAANAGF  
GINLNVLQEGYEAGLSLKRGT-----LGQNLMYFETGQGSALSANAHHG-----VD  
QQTCE TRAYAVARHF KPFL-----VNTVVGFIGPEYLYNGKQIIRAGLEDH  
FCGKLLGVPMGCDICYTNHAEADQDDMDTLLTLLGVAGINFIMGIPGSDDIMLNYQTTSF  
HDALYARQTLGLKPGPEFEAWLARTGIFTQADGRVRFQDNLPPA--FR--QALA-----  
-----

SupplementalMultipleSequenceAlign.txt

-----QLA-----  
-----  
-----  
-----

>gi|220921383|ref|YP\_002496684.1| Ethanolamine ammonia lyase large subunit  
[Methylobacterium nodulans ORS 2060]

-----MAYRHVVGPRSW  
VF-----SDLAELMAKASPIRSGD-----  
RLAGIAAGSAEESVAARWCLAEVPLADLVNR-----PLIPYEEDDVTRLILDTHDAGA  
FAPIAHVTVGGFREFLLT--A---DTAALAALAPGITPEIAAAVSKIMRNQDLILVARKC  
RVVTRFRNTIGLPGTMAVRLQPNHPSDDPAGITAAILDGLSYGCGDAVIGINPASDSVQA  
LTRLLHLLDDLIARFAIP--TQGCVLAVHTTTLEAIGRG-VPVDLVFQSIAGTQGANAAF  
GVTLPLL RQAQEAALSLRRGT-----LGDNVMYFETGQGSALSAEAHHG-----ID  
QQTLEARAYAVARAFRPLL-----VNTVVGFIGPEYLYDGKEIIRAGLEDH  
FCGKLMGVP L GCDVCYTNHAEADQDDMDTLLTLLGAAGVTYIMGVPGADDVMLNYQSTSF  
HDQLYLREVLGLKRVPEFAAWLERIGLTD-AAGALIPGGGTPLLAAP--GLAA-----  
-----  
-----

>gi|104779889|ref|YP\_606387.1| ethanolamine ammonia-lyase, heavy chain [Pseudomonas  
entomophila L48]

-----MASFVHTVGHQIY  
RF-----DSLKEVMAKASPARSGD-----  
YLAGVAASNDGERVAAQMALADIPLTHFLNE-----ALIPYEQDEVTRLIIDTHDKQA  
FAPVSHLTVGGLRDWLLGEQA---DEHSLRALAPGLTPEMAAAVSKIMRVQDLVLVAQKI  
RVVTQFRGTMGLRGRSLRQLPNHPTDEPAGIAASILDGLLYGNGDAMIGINPATDSIAS  
ICALLEMLDAIIQRYQIP--TQACVLTHVTTSEAINRG-VPLDLVFQSIAGTEAANASF  
GINLNVLQEGYEAGLSLKRGT-----VGQNLMYFETGQGSALSANAAHHG-----VD  
QQTCEARAYAVARHF KPFL-----VNTVVGFIGPEYLYNGKQIIRAGLEDH  
FCGKLLGVPMGCDICYTNHAEADQDDMDTLLTLLGVAGINFIMGIPGSDDIMLNYQTTSF  
HDALYARQTLGLKPGPEFEAWLERTGIFTQADGRVRF GDNLPPA--FR--HALA-----  
----HLA-----  
-----  
-----

>gi|159898781|ref|YP\_001545028.1| ethanolamine ammonia lyase large subunit  
[Herpetosiphon aurantiacus ATCC 23779]

-----MTSYQHSIRQRQY  
QF-----DSLKTL LAKATPERSGD-----  
ALAGLIAASAEERVAQWCLADVPLTTFLNE-----VVIPIYETDEVTRLIIDSHDQAA  
FAPIRHLTVGGLREWLLDYRT---DSQQLAAVAAGITPEMAAAVSKIMRNQDLIAVAKKC  
QVITRFRNTLGLAGRFSSRLQPNHPTDDPQGIAAAIFDGLLYGCGDAVIGINPATDSPQA  
MTSLLHLIDELRQRYAMP--VQSCVLAVHTTALQVIELG-APVDLVFQSIAGTEAANRSF  
GIDLALLHEANQAARGLQRGT-----IGNNVMYFETGQGSALSANAAHHG-----VD  
QQTCEARAYAVARAFEPLL-----LNTVVGFIGPEYLYDGKQITRAALEDH  
FCGKLLGLPMGCDACYTNHAEADQNDIDNLLVLLASAGCTYVMGVPGADDIMLNYQSSSY  
HDIRFVQTTLGLRPAPEFEAWLQQLGISD-QAGRLI-ANERHRL--LQ--SAAQ-----  
----LGAL-----  
-----  
-----

>gi|146341484|ref|YP\_001206532.1| ethanolamine ammonia-lyase heavy chain  
(ethanolamine ammonia-lyase large subunit) [Bradyrhizobium sp. ORS278]

-----MGFSHTLGGTTY  
RF-----DDLRTLLAKATPLRSGD-----  
VLAGLAAQDAAERVAARMALADLPLRHFLNE-----AVIPIYESDEVTRLIVDQHDGAA  
FAAIASLTVGSFREWLLSDAT---DATMLAAVSLGLTPEMVAAVCKIMRLQDLVTVAAC  
EVITRFRCTIGLKGTMSTR LQPNHPLDDPKGVAASILDGLMYGVGDATIGMNPASDDVDT  
-----

SupplementalMultipleSequenceAlign.txt

MVRLLDMIETLRLASDAP--IQSCVLAHVTTALKAIERR-APVDLVFQSLAGTEEANRGF  
GITLALLDEALAAANSLQRCP-----AGGNVMYFETGQGSSELSSSGHCG-----VD  
QQTLEARCYAVARRYPRL-----VNTVVGFIFGPEYLYDGKQIIRAGLEDH  
FCGKLLGLPMGCDVCYTNHAEADQDDMDALLTLLGIAGCTYIMGVPGADDIMLNYQSTSF  
HDALYVRKVLGKRAAPEFEAWLAATGISD-AGGELRFEPERLMPALPL--LGAE-----  
-----  
-----  
-----  
-----

>gi|148545832|ref|YP\_001265934.1| ethanolamine ammonia lyase large subunit  
[Pseudomonas putida F1]

-----MASFVHTVGHLVY  
RF-----DSLKDVMAKASPARSGD-----  
CLAGVAASNDGERVAAQMALANIPLTHFLNE-----ALIPYEAEDEVTRLIIDTHDAQA  
FAPVSHLTVGGLRDWLLSEEA---NEDSLRALAPGLTPEMAAAVSKIMRVQDLVLAQKI  
RVVTRFRGTMLRGRSLRQLPNHPTDEPAGIAASILDGLLYGNGDAMIGINPATDSIAS  
ICALLEMLDAIIQRYDIP--TQSCVLTHVTTSEAINRG-VPLDLVFQSIAGTEAANAGF  
GINLNLVQEGYEAGLSLKRGT-----LGQNLMYFETGQGSALSANAHHG-----VD  
QQTCE TRAYAVARHF KPF L-----VNTVVGFIFGPEYLYNGKQIIRAGLEDH  
FCGKLLGVPMGCDICYTNHAEADQDDMDTLLTLLGVAGINFIMGIPGSDDIMLNYQTTSF  
HDALYARQTLGLKPGPEFEAWLARTGIFTQADGRVRFQDNLPPA--FR--QALA-----  
----QLA-----  
-----  
-----  
-----

>gi|94314821|ref|YP\_588030.1| ethanolamine ammonia-lyase heavy chain [Ralstonia  
metallidurans CH34]

-----MAFTHTVGVRRH  
VF-----DDLRTLLAKASPARSGD-----  
ALAGIAAASEEERMAARMALADMPLAHCLAE-----PLVPYEAEDEVTRLIVDSHDAQA  
FAALASLTVGDFRDWLLRHDT---DTATLARVAPGVTPEMAAAVSKLMRNQDLVAVARKC  
AVVTAFRNTIGLPGRLSVRLQPNHPTDDPRGIAASIIDGLLFGCGDATIGINPASDNLGA  
ITTLKLLDDIRIRYEIP--TQSCVLTHVTNTLRVMELG-APVDLVFQSVAGSQAANAFA  
GISLALLEEARQAALSLRRGT-----VGHNVMYFETGQGSALSANAHHG-----VD  
QQTMEARAYAVARRFEPL-----VNTVVGFIFGPEYLYDGKQIIRAGLEDH  
FCGKLLGVPMGCDVCYTNHAEADQDDMDNLLTLFGVAGINFIMGVPGADDIMLNYQSTSF  
HDALYLREVLGLRPAPEFEAWLRKMGIVD-AGGRLLLEPGTRQAL--LT--MADT-----  
-----L-----  
-----  
-----  
-----

>gi|152968880|ref|YP\_001333989.1| ethanolamine ammonia-lyase, heavy chain  
[Klebsiella pneumoniae subsp. pneumoniae MGH 78578]

-----MYKTTLSGQVW  
RF-----DSLKTLMAKASPARSGD-----  
ALAGIIATSAEERMAAKMALAEVPLTDILDN-----PLIPYEQDEVTRLILDTHDAQG  
FAALRHLLTVGDFRDWLLDDAT---DTATLQRVARAITPEMAAAVSKLMRNQDLILAASKC  
QVVTRFRNTIGLPGHLSVRLQPNHPTDDLKGIAASMLDGLLYGAGDAVIGINPASDSL PV  
LAQLNVMLEDDIIQRFAP--TQSCILTHVTNTLQLIERG-APVDLVFQSVAGTEAANS GF  
GINLAMLEAREAAALSLRRGT-----LGNNVMYFETGQGSCLSANAHHG-----VD  
QQTCEARAYAVARHFEP L-----VNTVVGFIFGPEYLYDGKQIIRAGLEDH  
FCGKLMGLPIGCDVCYTNHAEADQDDMDTLLTLLCAAGLTFLIGVPGADDIMLNYQSTSF  
HDALYARRLLGLKHAPEFADWLAKMQIID-PHGALRLTDARHPL--LS--VLPQ----GA  
SV-----  
-----  
-----  
-----

>gi|77461212|ref|YP\_350719.1| ethanolamine ammonia-lyase heavy chain [Pseudomonas  
fluorescens Pf0-1]

SupplementalMultipleSequenceAlign.txt

-----MAAFAHTVGAQTY  
RF-----DSLKDVMKASPARSGD-----  
FLAGVAALNDGERVAAQMALADIPLTHFLQE-----ALIPYEADDEVTRLIIDSHDKQA  
FAVVSHTLVGGFRDWLLSEAA---DESSLRALAPGLTPEMVAAVSKIMRVQDLVLAQKI  
RVVTKFRGTLGLRGRLLSTRLQPNHPTDEPSGIAASILDGLLYGNGDAMIGINPATDSIAS  
ICAMLEMLDAIIQRYDIP--TQACVLTHVTTSSIEAINRG-VPLDLVFQSIAGTEAANASF  
GINLNILQEGYEAGLSLNRGT-----LGQNLMYFETGQGSALSANAHHG-----VD  
QQTCE TRAYAVARHF KPFL-----VNTVVGF IGPEYLYNGKQIIRAGLEDH  
FCGKLLGVPMGCDICYTNHAEADQDDMDTLLTLLGVAGINFIMGIPGSDDIMLNYQTTSF  
HDALYARQTLGLKPAPEFEQWLAKMGI FTQADGKVRFGNNLPPA--FR--QALA-----  
----QLG-----  
-----  
-----

>gi|66043895|ref|YP\_233736.1| ethanolamine ammonia lyase large subunit [Pseudomonas syringae pv. syringae B728a]

-----MASFHSVGAQTY  
RF-----DSLKEVMKASPARSGD-----  
YLAEEVAAQNDRGERVAAQMALANIPLKHFL EE-----ALIPYEQDEVTRLIIDTHDKLA  
FAPVSHTLVGGFRDWLLSDKA---DETSRLRALAPGLTPEMAAAVSKIMRVQDLVLAQKI  
RVVTRFRNTMGLRGRLLSTRLQPNHPTDDPSGIAASVLDGLLYGNGDAMIGINPATDSTSS  
IVALLEMLDAIVQRYEIP--TQSCVLTHVTTSSIEVINRG-VPVDLVFQSITGTEAANASF  
GISLKLQEGYEAGLSLNRGT-----LGQNLMYFETGQGSALSANAHHG-----VD  
QQTCE TRAYAVARHFNPFL-----VNTVVGF IGPEYLYNGKQIIRAGLEDH  
FCGKLLGVPMGCDICYTNHAEADQDDMDTLLTLLGVAGINFIMGIPGSDDIMLNYQTTSF  
HDALYARQSLGLRPAPEYEAWLKMGIFTQADGRVRFGDSLPPA--FR--QALA-----  
----HLA-----  
-----  
-----

>gi|28867955|ref|NP\_790574.1| ethanolamine ammonia-lyase, heavy subunit [Pseudomonas syringae pv. tomato str. DC3000]

-----MASFHSVGAQTY  
RF-----DSLKEVMKASPARSGD-----  
YLAEEVAAQNDAERVAAQMALANIPLKHFL EE-----ALIPYEQDEVTRLIIDTHDKLT  
FAPVSHTLVGGFRDWLLSDQA---DETSRLRALAPGLTPEMAAAVSKIMRVQDLILVAQKI  
RVVTRFRNTMGLRGRLLSTRLQPNHPTDDPSGIAASVLDGLLYGNGDAMIGINPATDSTSS  
IVALLEMLDAIIQRYDIP--TQSCVLTHVTTSSIEVINRG-VPVDLVFQSITGTEAANASF  
GINLKLQEGYEAGLSLNRGT-----LGQNLMYFETGQGSALSANAHHG-----VD  
QQTCE TRAYAVARHFNPFL-----VNTVVGF IGPEYLYNGKQIIRAGLEDH  
FCGKLLGVPMGCDICYTNHAEADQDDMDTLLTLLGVAGINFIMGIPGSDDIMLNYQTTSF  
HDALYARQSLGLRPAPEYEAWLKMGIFTQDGRVRFGDSLPPA--FR--QALA-----  
----HLA-----  
-----  
-----

>gi|53724039|ref|YP\_104486.1| ethanolamine ammonia-lyase heavy chain [Burkholderia mallei ATCC 23344]

-----MLAKASPLRSGD-----  
QLAGVAASTEERVAAKMALASAPLTAFLNE-----AVIPYEDDEVTRLVVDTHSRDA  
FAEISHTLVGDFRNWLLSPAA---DAAALERIAPLTPEMVAAVSKLMRNQDLIAAARKR  
RVVTRFRNTVGLPGRMSVRLQPNHPTDDVKGIAASMLDGLMYGCGDAMIGINPATDSLAA  
ITKLLAMIDAFRERYRVP--TQSCVLTHVTNTIAAIDKG-APVDLVFQSIAGTEKANASF  
GISLALLAEAREAAALALKRGT-----VGNNLMYFETGQGSALSANAHHG-----VD  
QQTCEV RAYAVARAFEPFL-----VNTVVGF IGPEYLYDGKQIIRAGLEDH  
FCGKLLGVPMGCDICYTNHAQADQDDMDNLLTLLGAAGINFIMGIPGADDVMLNYQSTSF  
HDQLYVREVLGLRRAPEFEWLETMEITD-AHGALRAASARVPL--LA--GAND-----  
----WMGRCA-----  
-----  
-----

SupplementalMultipleSequenceAlign.txt

>gi|218530187|ref|YP\_002421003.1| Ethanolamine ammonia lyase large subunit  
[Methylobacterium chloromethanicum CM4]

-----MPYRHTVGPRTH  
VF-----ADLATLMAKATPVRSGD-----  
CLAGIAAESAEENMAARWCLAEVPLKEILAR-----PLIPYDEDDVTRLILDHDEAA  
FAEIAALTVGDFREFLLT--A---SSETLARIAPGVTPEIAAAVSKIMRNQDLILVAKKC  
RVVTRFRNTIGLPGTLAVRLQPNHPTDDPAGVTASILDGLSYGCGDAVIGINPVSDSIQT  
MGTLRLFDGIIGRLEIP--TQACVLTHVTTTLDAMNRG-LPVDLVFQSIAGTQRANASF  
GVTLPILQEAEHAALALKRGT-----LGDNVMYFETGQGSALSADAHHG-----ID  
QQTLEARAYAVARRYPRL-----VNTVVGFIGPEYLYNGKEIIRAGLEDH  
FCGKLMGVPLGVDVCYTNHAEADQDDMDTLLTLLGAAGCTYVMGIPGADDVMLNYQSTSF  
HDQLYIREVLGLRRAPEFEWLARIGLTD-ADGTLLPGGAEARL--LT--AAPE-----  
----LAA-----

>gi|163851379|ref|YP\_001639422.1| ethanolamine ammonia lyase large subunit  
[Methylobacterium extorquens PA1]

-----MPYRHTVGPRTH  
VF-----ADLATLMAKATPVRSGD-----  
CLAGIAAESAEENMAARWCLAEVPLREILAR-----PLIPYDEDDVTRLILDHDEAA  
FAEIAALTVGDFREFLLT--A---SSETLARIAPGVTPEIAAAVSKIMRNQDLILVAKKC  
RVVTRFRNTIGLPGTLAVRLQPNHPTDDPAGVTASILDGLSYGCGDAVIGINPVSDSIQT  
MGTLRLFDGIIGRLEIP--TQACVLTHVTTTLDAMNRG-LPVDLVFQSIAGTQRANASF  
GVTLPILQEAEHAALALKRGT-----LGDNVMYFETGQGSALSADAHHG-----ID  
QQTLEARAYAVARRYPRL-----VNTVVGFIGPEYLYNGKEIIRAGLEDH  
FCGKLMGVPLGVDVCYTNHAEADQDDMDTLLTLLGAAGCTYVMGIPGADDVMLNYQSTSF  
HDQLYIREVLGLRRAPEFEWLARIGLTD-ADGALLPGGAEARL--LT--AAPE-----  
----LAA-----

>gi|170739179|ref|YP\_001767834.1| ethanolamine ammonia lyase large subunit  
[Methylobacterium sp. 4-46]

-----MVYRHVVGPRTW  
LF-----ADLAELMAKASPIRSGD-----  
RLAGLAAGSAEESVAARWCLAEVPLADLMNR-----PLIPYEADDVTRLILDSHDA  
FAAIAHLTVGDFREFLLT--A---DAAALARIAPGITPEIAAAVSKIMRNQDLILVARKC  
RVVTRFRNTIGLPGTMAVRLQPNHPGDDPAGITAAILDGLAYGCGDAVIGINPVSDSVQA  
ISRLHLDDLARLEIP--TQGCVLTHVTTTLEAIRRG-VPVDLVFQSIAGTQAANASF  
GVTLPPLAEAREAAALSLKRG-----LGEDVMYFETGQGSALSADAHHG-----ID  
QQTLEARAYAVARAFRPLL-----VNTVVGFIGPEYLYDGKEIIRAGLEDH  
FCGKLMGVPLGCDVCYTNHAEADQDDMDTLLTLLGAAGVSYVMGVPGADDVMLNYQSTSF  
HDQLYLRVGLKRAPEFAAWLARIGLTD-AAGALLPGGA-RPL--LA--AAPG-----  
----LAA-----

>gi|15599219|ref|NP\_252713.1| ethanolamine ammonia-lyase large subunit [Pseudomonas  
aeruginosa PA01]

-----MARFTHSVGGETY  
RF-----DSLKDVMAKASPARSGD-----  
FLAGVAASNDGERVAAQMALADIPLKHFLDE-----ALIPYEDDEVTRLIIDTHQRDA  
FAPVSHLTVGGFRDWLLGDAA---DEASLRALAPGLTPEMAAVSKIMRVQDLVLVAQKI  
RVVTRFRNTLGLRGRSLRQLQPNHPTDDPAGIAASILDGLLFGNGDAMLGINPATDSMAS  
ICALLEMLDAIIQRYEIP--TQACVLTHVTSSIEAINRG-VPLDLVFQSIAGTEAANASF  
GISLKILQEGYEAGLSQKRG-----LGNNLMYFETGQGSALSANAHHG-----VD



SupplementalMultipleSequenceAlign.txt

QQTCE TRAYAVARHF KPFL-----VNTVVGFIGPEYLYNGKQIIRAGLEDH  
FCGKLLGVPMGCDICYTNHAEADQDDMDMLLTLLGVAGINFIMGIPGSDDVMLNYQTTSF  
HDALYARQTLGLKPAPEFEDWLQRMGIFTQADGRIRFGDELPPA--FR--QALA-----  
-----QLA-----  
-----  
-----  
-----

>gi|71735666|ref|YP\_276772.1| ethanolamine ammonia-lyase, heavy subunit [Pseudomonas syringae pv. phaseolicola 1448A]

-----MASFSHSVGAQTY  
RF-----DSLKEVMAKASPARSGD-----  
YLAEVAQAQSDGERVAAQMTLANIPLKHFLEE-----ALIPYEQDEVTRLIIDTHDKLA  
FAPVSHLTVGGFRDWLLSEQA---DETSRLRALAPGLTPEMAAAVSKIMRVQDLVLAQKI  
RVVTRFRNTMGLRGRLLSTRLQPNHPTDDPSGIAASVLDGLLYGNGDAMIGINPATDSTSS  
IVALLEMLDAIVQRYEIP--TQSCVLTHVTTSSIEVINCG-VPVDLVFQSITGTEAANASF  
GISLKLLEQEGYEAGLSLNRGT-----LGKNLMYFETGQGSALSANAHHG-----VD  
QQTCE TRAYAVARHFNPFL-----VNTVVGFIGPEYLYNGKQIIRAGLEDH  
FCGKLLGVPMGCDICYTNHAEADQDDMDMLLTLLGVAGINFIMGIPGSDDIMLNYQTTSF  
HDALYARQSLGLRPAPEYEAWLEKMGIFTQDGRVRFGDSLPPA--FR--QALA-----  
-----HLA-----  
-----  
-----

>gi|217978558|ref|YP\_002362705.1| Ethanolamine ammonia lyase large subunit [Methylocella silvestris BL2]

-----MTYAKSVGGRTY  
RF-----PDLKTL LAKASPARSGD-----  
YLAGVAAEDDSERAAAQMALSDTPLKAFLENE-----VVIPIYEDDEVTRLIIDRHDADA  
FAPVSGLTVGDFRNWLLGAEA---NEAALTKLSPGVTPEMAAVSKLMRVQDLILVARKC  
RVVTRLRNTIIGLAGRLSTRLQPNHPTDDPAGIAASILDGLLYGSGDAVIGINPATDSVPA  
VCALLTMLDEVIHKYEIP--TQSCVLTHVTTSSIEAINRG-VPVDLVFQSVAGTEAANKSF  
GVDLAVLKEGREAAALAKRGT-----VGDNVMYFETGQGSALSANAHHG-----VD  
QQTCEARAYAVAREFHPLL-----VNTVVGFIGPEYLYNGKQIIRAGLEDH  
FCGKLLGLPMGCDICYTNHAEADQDDMDMLLTLLPAAGCSFIMGIPGSDDIMLNYQTTSF  
HDALYVREVLGLRMAPEFESWLIRKGVFE-GADHPRPRKALSSM--FA--PALA-----  
-----RIA-----  
-----  
-----

>gi|152994514|ref|YP\_001339349.1| ethanolamine ammonia lyase large subunit [Marinomonas sp. MWYL1]

-----MSKPNSTFQFKNIVGERTF  
GF-----VDLADLMAKATPARSGD-----  
RLAGVAAQSAEERAIQAQMTLADVPLSLFLEQ-----ALVPYEEDEITRLIIDDDHKSA  
FSAISHLTVGGFRDWLLSDLA---SSEILIQIRAGVTPEMAAVSKIMRNQDLILVAKKC  
HVKTAFRNTIIGLPGHLSTRLQPNHPTDDL T GIAASMLDGLLYANGDAVIGINPATDNVQQ  
ATRLIKMMDEVIQHYEIP--TQSCVLTHVTNTIECIEQG-APVDLVFQSIGGTQATNDSF  
GFNLATLAEQAQAALSLNRGT-----VGNNVMYFETGQGSALSANANHG-----LD  
QQTCEARAYAVARKFNPLL-----VNTVVGFIGPEYLYDGKEITRAGLEDH  
FCGKLLGLPMGCDVCYTNHAEADQNDMDNLLTLLGVAGCTFVMGIPGSDDIMLNYQTTSF  
HDALYARRVLGLKPAPEFDLWLAKMEIFK-NEEQFTLNHQLPDA--FH--KSLN-----RM  
IGGKS-----  
-----  
-----

>gi|152984792|ref|YP\_001346468.1| ethanolamine ammonia-lyase large subunit [Pseudomonas aeruginosa PA7]

-----MARFTHSVGGETY  
RF-----DSLKDVMKASPARSGD-----

SupplementalMultipleSequenceAlign.txt

FLAGVAASNDGERVAAQMALADIPLKHFLDE-----ALIPYEDDEVTRLIIDTHQRDA  
FAPVSHLTVGGFRDWLLGDAA---DEASLRALAPGLTPEMAAAVSKIMRVQDLVLAQKI  
RVVTRFRNTLGLRGLSTRLPNHPTDDPAGIAASILDGLLFGNGDAMLGINPATDSMAS  
ICALLEMLDAIIQRYEIP--TQACVLTHVTSSIEAINRG-VPLDLVFQSIAGTEAANASF  
GISLKI LQEGYEAGLSQKRGT-----LGNNLMYFETGQGSALSANAHHG-----VD  
QQTCE TRAYAVARHF KPFL-----VNTVVGFIGPEYLYNGKQIIRAGLEDH  
FCGKLLGVPMGCDICYTNHAEADQDDMDMLLTLLGVAGINFIMGIPGSDDVMLNYQTTSF  
HDALYARQTLGLKPAPEFEDWLQRMGIFTQADGRIRFGEELPPA--FR--QALA-----  
----QLA-----  
-----  
-----  
-----

>gi|91977449|ref|YP\_570108.1| ethanolamine ammonia lyase large subunit  
[Rhodopseudomonas palustris BisB5]

-----MRYRTAIDQQLF  
AF-----DSLKQVMAYASPARSGD-----  
YLAGIGAATAQERMAARHVLAEVPLKQFLNE-----ALIPYEDDNITRLIIDGHDAKA  
FAPVSHMTVGDFRNWLLSEQA---TTQALAALAQGLTPEMVAAVSKIMRNQDLIAVARKV  
RVVTRFRNTIAGHLAVRLQPNHPTDDL RGVAASTLDGLL MGS GDAVIGLNPASDSL PV  
LGDLLRMLDEVIHRFEIP--TQSCVLTHVTNTVQLINDG-APVDL VFQSIGGTEKTNLSF  
GVTPEILHEAREEALS LKRGT-----VGDNVMYFETGQGSALSADANFG-----VD  
QQTCEARAYALARLYQPLL-----VNTVVGFIGPEYLYDGKQIIRAGLEDH  
FCGKLLGLPLGCDICYTNHAEADQDDMDTLLVLLGAAGISFIMGIPGADDVMLNYQSTSF  
HDALFLRDLMLNKRAPEFEMWLQRMQITD-DAGRLRPPSPNPLLGGMG--KLKS-----  
----LVA-----  
-----  
-----  
-----

>gi|158425188|ref|YP\_001526480.1| ethanolamine ammonia-lyase large subunit  
[Azorhizobium caulinodans ORS 571]

-----MTYVHVQVGSRRF  
AF-----ADLKELMAKATPPRSGD-----  
MLAGIAAATAEENVAAKMALADVPLKTF LSE-----ALVPYETDEVTRLIIDGHDAKA  
FAPVSAFTVGDFRDWLLSEAA---DSAALARLAPGLTPEMVAAVSKLMRNQDLILIAKKC  
RVVTRFRNTI GLPGTLAVRLQPNHPTDDPAGISAAML DGLLYGCGDAVIGINPASDSL PV  
LDRLIKLTAEVIERFDIP--TQSCILTHVTSSIELMNRG-APVDL VFQSIAGTEAANRSF  
GIDLAVLKEGTDAARALKRGT-----VGQNAMYFETGQGSALSANAHHG-----VD  
QQTLEARAYGVARVFEPLL-----VNTVVGFIGPEYLYDGKQIIRAGLEDH  
FCGKLLGVPLGVDVCYTNHAEADQDDMDTLLTLLAAAGVTYIMGIPGADDVMLNYQSTSF  
HDALYVREVF GARRAPEFEGWLERMAITG-PDGRLLPATGSHPL--LG--FATE-----  
----RAA-----  
-----  
-----  
-----

>gi|188581160|ref|YP\_001924605.1| Ethanolamine ammonia lyase large subunit  
[Methylobacterium populi BJ001]

-----MPYRHTVGP RTH  
VF-----ADLATLMAKATPVRSGD-----  
CLAGIAAESAEENMAARWCLA EVPLKEILAR-----PLIPYEADDVTRLIIDDHDEAA  
FAEIASLTVGDFREFLLT--A---SSETLARIAPGVTPEIAAAVSKIMRNQDLILVARKC  
RVVTRFRNTI GLPGTLAVRLQPNHPTDDPAGVTASILDGLSYGCGDAVIGINPVSDSIQT  
MGTLTTLFDSIIERLEIP--TQACVLTHVTTTLDAMNRG-LPVDL VFQSIAGTQRANASF  
GVTLPILQEAEHAALALKRGT-----LGDNVMYFETGQGSALSADAHHG-----ID  
QQTLEARAYAVARRYRPLL-----VNTVVGFIGPEYLYDGKEIIRAGLEDH  
FCGKLMGVPLGVDVCYTNHAEADQDDMDTLLTLLGAAGCTYVMGIPGADDVMLNYQSTSF  
HDQLYIREVLGLRRAPEFEELARIGLTD-ASGTL LPGAESRL--LT--AAPD-----  
----LAA-----  
-----  
-----  
-----

SupplementalMultipleSequenceAlign.txt

>gi|116694056|ref|YP\_728267.1| ethanolamine ammonia-lyase heavy chain [Ralstonia eutropha H16]

-----MAYTHTIGTHRH  
VF-----ADLRTLARASPARSGD-----  
ALAGVAAASEQERMAARLALAEVPLKQFLTE-----ALVPYEDDEVTRLILDRHDGAA  
FAAIGATTVGDLRNWLLHET---DSAMLARVAPGITPEMAAAVSKLMRNQDLVAVARKC  
QVVTRFRSTVGLPGRLSVRLQPNHPTDDPKGIAASIIDGLLYGCGDATIGVNPASDNLGA  
IVSLLRMIDELRSRFDIP--TQSCVLTHVTNTLRAIGQG-APVDLVFQSVAGSERANAFA  
GISLALLAEAHDAQAALARGT-----VGDNLMYFETGQGSALSANAHHG-----VD  
QQTMEARAYAVARAFAPLL-----VNTVVGFIGPEYLYDGKQIIRAGLEDH  
FCGKLMGVPMGCDVCYTNHAEADQDDMDTLLTLFGVAGINFIMGVPGADDIMLNYQSTS  
FDALYLREVLGLRPAPEFAWLQRMGIAD-ASGRLLLEPAARQPL--LQ--MAHS-----  
-----L-----  
-----  
-----  
-----

>gi|148253763|ref|YP\_001238348.1| ethanolamine ammonia-lyase heavy chain [Bradyrhizobium sp. BTAi1]

-----MTGAFRSRHRGETH  
VF-----DDLKTLLACASPRRSGD-----  
ELAGVAADSAARRVAARMALADVPLRRFLDE-----PLIPYETDEVTRLILDSHDA  
FAPVAALTVGQFREWLLSWEA---DADRLATLAPGLTPEMVAAVSKLCGNGDLIAIAAKC  
RVVTAFRSTIGLPGRSSRLQPNDDPQAIAAGTLDGLLFGMGDAVIGINPATDNVEA  
CIRLLSMLDDIRCKFEVP--TQSCVL SHVTTSIQAI EQG-APLDLVFQSIAGTEANAGF  
GVTLLALLAEAQDAAQSLKRG T-----IGSNVMYFETGQGAALSADAHHG-----LD  
QQTVEARAYAVARAFSPLL-----VNTVVGFIGPEYLYDAKEIIRAGLEDH  
FCAKLLGVPMGCDVCYTNHAEADQDDMDLALLLAAANVNFLI AVPGADDIMLNYQSLSH  
HDVMRLRHLLNRRRPAPEFAWLARMGLLD-EHGRVPPLPRSAPA--VT--RLIG-----  
-----RGARA-----  
-----  
-----  
-----

>gi|169633292|ref|YP\_001707028.1| ethanolamine ammonia-lyase, heavy chain [Acinetobacter baumannii SDF]

-----MSYRNIVANQQY  
HF-----ADLKTLMAKATPLRSGD-----  
ELAGVAARDATEHVAAQMTLADVPLKTFLNE-----VVIDYETDEITRLIIDEHDLAA  
FTPISHFTVGDFRNWLLGEDA---TAQSLKALASGLTPEMVAAVSKIMRNQDLIYVASKC  
EVVTQFRNTIGLKGHLSRLQPNHPTDDVLGISASILDGLMYGNGDAVIGINPATDNLHN  
LSELLKLLDHVIQEQYQIP--TQSCVLTHISSGIQLAEKN-VPIDLMFQSIAGTQLANEGF  
GISLDLLQEGYEATLSLKRGI-----IGQNVMYFETGQGSALSSNAHHG-----VD  
QQTLETRAYAVARKYNPLL-----VNTVVGFIGPEYLFNGKQIIRAGLEDH  
FCGKLLGVPMGCDICYTNHADADQNDMDVLLTLFGAAGINFIMGIPGSDVMLNYQTTSF  
HDALYL RQLLGLKPAPEFSAWLEQQGIFKQNSQICWANHMPDQ--FS--RLLMN-----  
-----  
-----  
-----

>gi|73539312|ref|YP\_299679.1| ethanolamine ammonia-lyase heavy chain [Ralstonia eutropha JMP134]

-----MAFTHTVGQHRH  
VF-----ADLRTLAKASPARSGD-----  
YLAGIAAASEEERMAARMALAAVPLTQFLSE-----ALVPYEDDEVTRLIVDSHDAVA  
FAEIASLTVGDFRNWLLHET---DSTTLATVARGITPEMAAAVSKLMRNQDLIAVARKC  
HVVTRFRSTVGLPGRLSVRLQPNHPTDDPKGIAASIIDGLMYGCGDATIGVNPVSDSLGA  
IVSLLRMIDDLRCRYDIP--TQSCVLTHVTHTLRAMEQG-APVDLVFQSVAGSERANAFA  
GISL SLLAEAHDAQAALARGT-----VGDNLMYFETGQGSALSANAHHG-----VD  
QQTMEARAYAVARRFSPLL-----VNTVVGFIGPEYLYDGKQIIRAGLEDH  
FCGKLLGVPMGCDVCYTNHAEADQDDMDTLLTLFGVAGINFIMGVPGADDIMLNYQSTS  
-----  
-----  
-----

SupplementalMultipleSequenceAlign.txt

HDALYLREVLGLRPAPEFEAWLQRMGIAD-GSGRLLLEPAERQPL--LE--LAHT-----  
-----L-----  
-----  
-----  
-----

>gi|119900118|ref|YP\_935331.1| ethanolamine ammonia-lyase large subunit [Azoarcus  
sp. BH72]

-----MSYRHTLDHHTW  
VF-----ADLRELMKASPARSGD-----  
QLAGIAAASAVERMAARMCLAELPLARFLDE-----ALIPYESDEVTRLIIDSHDRAA  
FAPVAHLTVGDFRDWLLSDHA---DEAALAALRPGLTPEMAAAVSKLMRNQDLVRVAQKC  
RVVTRFRNTIGLPGRLSVRLQPNHPTDDARGIAAAIVDGLLYGAGDAVIGVNPASDSIAA  
LTKLVHMLDEVIARLDLP--TQSCVLTHVTNTVHMIIEGG-APVDLVFQSVAGTEAANAFA  
GISLATLREAREAALS LKRG T-----VGDNVMYFETGQGSALSANAHHG-----VD  
QQTCEARAYAVAREFKPLL-----TNTVVGFIGPEYLYDGKQIIRAGLEDH  
FCGKLLGLPLGCDVCYTNHAEADQDDMDNLLTLLGVAGVSFIMGVPGADDIMLNQSTSF  
HDGLYLRRALGLRRAPEFEDWLQRMQLVD-AAGRALPISPQHPA--LA--ALRR-----  
-----LTP-----  
-----  
-----

>gi|146307704|ref|YP\_001188169.1| ethanolamine ammonia lyase large subunit  
[Pseudomonas mendocina ymp]

-----MPYQTTIGNLVY  
RF-----ADLKTLLAKASPARSGD-----  
YLAGLAAATYEERMAAKLALAEVPLKRFLDE-----ALIPYEQDEVTRLIIDRHDA  
FAPISHLTVGDLRDWLLLEKT---DSVRLAAVAAGLTPEMVAAVSKLMRNQDLILVARKC  
QVISRFRNTLGLPGHLAVRLQPNHPTDDVIRGIAASMLDGLLYGSGDATVGINPASDSLPT  
LMRLWQMMDEVQRHFEIP--MQSCVLTHVTTQIQAIIEAG-APIDLVFQSIAGTEATNAGF  
GVSLAILREAEHAALS LGRGT-----LGDNVMYFETGQGSALSAGGHHG-----VD  
QQTCEARAYAVAREFRPLL-----VNTVVGFIGPEYLYDGKQIIRAGLEDH  
FCAKLLGLPMGCDVCYTNHAEADQDDMDSLLTLLGAAGINFIMGIPGADDIMLNQSTSF  
HDALYLRSVLGLKRAPEFDAWLARMAITE-PTGRLREIGRGHHL--LK--QLPH-----  
-----ISGAA-----  
-----  
-----

>gi|154247955|ref|YP\_001418913.1| ethanolamine ammonia lyase large subunit  
[Xanthobacter autotrophicus Py2]

-----MAYVHRIGAKTF  
VF-----ADLKELMAKATPPRSGD-----  
MLAGIAAATAEENVAARMCLADVPLKAFLESE-----ALVPYETDEVTRLIIDSHDGD  
FAPVSAMTVGDFRDWLLSHEA---TSQVLAGLARGLTPEMVAAVSKIMRNQDLILVAKKC  
RVVTRFRNTIGLPGTMAVRLQPNHPTDDAAGVSAAILDGLLYGCGDAVIGINPASDSL  
IDRLKLMDEVITRFEIP--TQSCVLTHVTTSIGLMERG-APVDLVFQSIAGTQGANRSF  
GIDLKVLAEGADAARALKRGT-----VGQNAMEYFETGQGSALSAGEHHG-----VD  
QQTLEARAYGVARAFEPLL-----VNTVVGFIGPEYLYDGKQIIRAGLEDH  
FCGKLLGVPLGVDVCYTNHAEADQDDMDTLLTLLGAAGVTYIMGIPGADDVMLNYQSTSF  
HDALYIRELLGLKRAPEFEAWLERMDITA-PDGRLLPADARHPL--LG--YVAG-----  
-----RAA-----  
-----  
-----

>gi|188591931|ref|YP\_001796529.1| ethanolamine ammonia-lyase, heavy chain  
[Cupriavidus taiwanensis]

-----MAYTHTIGNHRH  
VF-----ADLRTLARASPARSGD-----  
ALAGLAAQSEQERMAARLALADVPLTRFLNE-----ALVPYEEDEVTRLIHDRHDA  
FAAIDATTVGDLRNWLLRQET---DSAMLARVAPGITPEMVAAVSKLMRNQDLVAVARKC

SupplementalMultipleSequenceAlign.txt

QVTRFRSTVGLPGRLAVRLQPNHPTDDPKGIAASIIDGLLYGCGDATIGVNPASDNLGA  
IVSLLRMIDELRSRFDIP--TQSCVLTHVTNTLRAIGQG-APVDLVFQSVAGSERANAAF  
GISLSLLAEAHDAQAALARGT-----VGDNLMYFETGQGSALSADAHHG-----VD  
QQTMEARAYAVARAFSPLL-----VNTVVGFIGPEYLYDGKQIIRAGLEDH  
FCGKLMGVPMGCDVCYTNHAEADQDDMDTLLTLFGVAGINFIMGVPGADDIMLNQSTSF  
HDALYLREVLGLRPAPEFEAWLQRIGIAD-GAGRLLLEPAARQPL--LQ--MAHT-----  
-----L-----  
-----  
-----  
-----

>gi|169795572|ref|YP\_001713365.1| ethanolamine ammonia-lyase, heavy chain  
[Acinetobacter baumannii AYE]

-----MSYRNIVANQQY  
HF-----ADLKTLMAKATPLRSGD-----  
ELAGVAARDATEHVAAQMTLADVPLKTFLE-----VLVDYETDEITRLIIDEHDLAA  
FAPISHFTVGDFRNWLLGEDA---TAESLKALASGLTPEMVAAVSKIMRNQDLIYVASKC  
EVVTQFRNTIGLKGHLSTRLQPNHPTDDVLGISASILDGLMYGNGDAVIGINPATDNLHN  
LSELLKLLDHVIEQYQIP--TQSCVLTHISSGIQLAEKN-VPIDLMFQSIAGTQLANEGF  
GISLDLIQEGYDATLSLKRGT-----IGQNVMYFETGQGSALSSNAHHG-----VD  
QQTLETRAYAVARKYNPLL-----VNTVVGFIGPEYLFNGKQIIRAGLEDH  
FCGKLLGVPMGCDICYTNHADADQNDMDVLLTLFGAAGINFIMGIPGSDVMLNYQTTSF  
HDALYLRQLLGLKPAPEFSAWLEQQGIFKQNSQICWADHMPDQ--FS--RLLMN-----  
-----  
-----  
-----

>gi|21243099|ref|NP\_642681.1| ethanolamine ammonia-lyase large subunit [Xanthomonas  
axonopodis pv. citri str. 306]

-----MSGFAFTAGGERF  
RF-----ADLKQLLAKATPARSGD-----  
QLAGLAADSGLQRVAAQMALADLPLQHFLQE-----AVVPYEADDEVTRLIIDQHDAVA  
FAVAHLTVGGFRDWLLSAQA---DEAALTALAPGLTPEMVAAVSKLMRVQDLILVAQKT  
RVVTRFRNTLGLRGLSTRLQPNHPTDDATGIAASVLDGLLYGNGDAVIGINPASDSLAA  
TTALLRMLGAVISGYRIP--TQSCVLAHITTTIEAIGRG-VPVDLVFQSIAGTEAANASF  
GINLALLQEGYEAGLSLRRGN-----VGDNVMYFETGQGSALSANAHHG-----VD  
QQTCEVRAYAVARHYKPLL-----VNTVVGFIGPEYLYDGKQIIRAGLEDH  
FCGKLLGVPMGCDICYTNHAEADQDDMDMLLTLGTAGINFIMGIPGSDVMLNYQTTSF  
HDALYARQALGLRAAPEFEQWLEQHDILQLRDGRFELGSDVPAP--FR--RALA-----  
-----QASGRAAP-----  
-----  
-----  
-----

>gi|184158620|ref|YP\_001846959.1| ethanolamine ammonia-lyase, large subunit  
[Acinetobacter baumannii ACICU]

-----MSYRNIVANQQY  
HF-----ADLKTLMAKATPLRSGD-----  
ELAGVAARDATEHVAAQMTLADVPLKTFLE-----VVVDYDTDEITRLIIDEHDLAA  
FAPISHFTVGDFRNWLLGEDA---TPESLKALASGLTPEMVAAVSKIMRNQDLIYVASKC  
EVVTQFRNTIGLKGHLSTRLQPNHPTDDVLGISASILDGLMYGNGDAVIGINPATDNLHN  
LSELLKLLDHVIEQYQIP--TQSCVLTHISSGIQLAEKN-VPIDLMFQSIAGTQLANEGF  
GISLDLLQEGYEATLALKRGT-----IGQNVMYFETGQGSALSSNAHHG-----VD  
QQTLETRAYAVARKYNPLL-----VNTVVGFIGPEYLFNGKQIIRAGLEDH  
FCGKLLGVPMGCDICYTNHADADQNDMDVLLTLFGAAGINFIMGIPGSDVMLNYQTTSF  
HDALYLRQLLCLKPAPEFSAWLEQQGIFKQNSQICWADHMPDQ--FS--RLLMN-----  
-----  
-----  
-----

>gi|148255138|ref|YP\_001239723.1| ethanolamine ammonia-lyase heavy chain

SupplementalMultipleSequenceAlign.txt

[Bradyrhizobium sp. BTAi1]

-----MGFSHSLGGTTY  
RF-----DDLRTLLAKATPPRSGD-----  
VLAGLAAQDAAERVAARMALADLPLRHFLDE-----AVIPYESDEVTRLIVDQHDGSA  
FAEIASLTVGAFREWLLSDAT---DARRLSAVSPGLTPEMVAAVCKIMRLQDLVTVAACK  
EVTFRFRCTIGLPGRMSTR LQPNHPLDDPKGVAASILDGLMYGVGDATIGINPASDDLDT  
MLRLLDMIETRLRLASHAP--IQSCVLAHVTTALKAIERR-APVDLVFQSLAGTEEANRGF  
GITLAQLDEALDAAEGLARGP-----AGANLMYFETGQGSSESSSGHCG-----VD  
QQTLEARCYAVARRYRPLL-----VNTVVGFIGPEYLYDGKQIMRAGLEDH  
FCGKLLGLPMGCDVCYTNHAEADQDDMDALLTLLGVAGCTYIMGVPGADDIMLNYQSTSF  
HDALYIRKVLGKRAAPEFEAWLAATGISD-GKGELRFDPARLMP--SL--PLLG----AE  
G-----  
-----  
-----

>gi|66768176|ref|YP\_242938.1| ethanolamine ammonia-lyase large subunit [Xanthomonas campestris pv. campestris str. 8004]

-----MSGFAFSAGGERF  
RF-----ADLKDLLAKATPARSGD-----  
QLAGLAAHSELQRVAAQMALAELPLRHFLDE-----AVVPYESDEVTRLIVDQHDA  
FAPVAHLTVGGFRDWLLGAQA---DDAALAALAPGLMPEMVAAVSKLMRVQDLILVAQKT  
RVVTRFRNTLGLRGR LSTR LQPNHPTDDATGIAASVLDGLLYGNGDAVIGINPASDSLAA  
TTALLRMLDAVITGYGIP--TQACVLAHITTTIDAINRG-VPVDLVFQSIAGTEAANTS  
GINLALLQEGLDAGLSQQRGS-----VGNNVMYFETGQGSALSANAHHG-----VD  
QQTCEVRAYAVARQFNPLL-----VNTVVGFIGPEYLYDGKQIIRAGLEDH  
FCGKLLGVPMGCDICYTNHAEADQDDMDMLLTLLGTAGINFIMGIPGSDVMLNYQTTSF  
HDALYARQALGLRPAPEFEHWLDTQGILRLRDGRFELGSEMPAP--FR--KALS-----  
----QLDAEQRG-----  
-----  
-----

>gi|145297995|ref|YP\_001140836.1| ethanolamine ammonia-lyase, large subunit [Aeromonas salmonicida subsp. salmonicida A449]

-----MYRTQLSHHG  
QF-----PDLRTLMAKATPARSGD-----  
YLAGVAAHSAEERMAARMALADLPLKTFLE-----ALIPYEQDEVTRLIMDNHDHAA  
FAPISHLTVGDFRNWLLSETA---NSQTLAHIAPGITPEMAAAVSKLMRNQDLILAACKC  
RVVTAFRNTIGLPGHL SVRLQPNHPTDDPQGIAAAML DGLLYGAGDAVVGINPASDNLV  
LASLNQMLDEVIQRFAIP--TQSCILTHVTNTLQLIERN-VPVDLVFQSIAGTEAANRGF  
GIDLALLQEAYDAALSLGRGT-----LGNNVMYFETGQGSCLSANAHHG-----LD  
QQTCEARAYGVARHFKPLL-----CNTVVGFIGPEYLYDGKQIIRAGLEDH  
FCGKLLGVPLGCDVCYTNHAEADQDDMDTLLTLLGNAGLTFLIGVPGADDIMLNYQSTSF  
HDALYIRELLGLKHAPEFADWLVRMQLTN-PGGQLLDASLRHPL--LT--AFGQ-----  
--SGKVA-----  
-----  
-----

>gi|29831087|ref|NP\_825721.1| ethanolamine ammonia-lyase large subunit [Streptomyces avermitilis MA-4680]

-----MSTYTARLGGRT  
SF-----PSLAALLAAASPERSGD-----  
RLAGLAADSAEARVAARWALAEVPLARFLAE-----PVIPEYEDDVTRLIVDTHDARA  
FAPVAGLCVGEFREWLLSDAA---DAGSLAALAPGLTPEMVAAVSKLMGNADLVAVARKA  
RVVTAFRSTIGLPGRLATRLQPNHPTDDPAGVAAALLDGLLLGSGDAVIGINPATDSPKA  
VRDLLELLDGVIRRYAIP--TQSCVLCVTTSIDLMERG-APVDLVFQSIAGTQAANASF  
GVTGLLLDEAYDAARGLGRGT-----AGQNALYFETGQGSALSANAHHG-----VD  
QQTVEARAYAVARRYDPLL-----VNTVVGFIGPEYLYDGRQILRAALEDH  
FCGKLLGLPMGLDICYTNHADADDDDIATMLTMLGVAGASFVICTPGGDDIMLNYQSASY  
HDALYLRVGLRPAPEFEDWLSRIGLLD-DAGAIRDVTGT AHP--LT--AIGR-----  
----ELAA-----  
-----  
-----

SupplementalMultipleSequenceAlign.txt

>gi|157371673|ref|YP\_001479662.1| ethanolamine ammonia lyase large subunit [Serratia proteamaculans 568]

-----MYQATLSRRSY  
RF-----SDLRQLMAKASPARSGD-----  
YLAEVAADSAEERMAARIALAEVPLKTFLLQ-----LLVPYEQDEVTRLIIDSHDALA  
FAPISHLTVGDFRDWLLSEQA---DSAMLAQVAPGITPEMAAAVSKLMRNQDLILVAKKC  
RVITRFRNTIGLPGHLSVRLQPNHPTDSLQGIASMLDGLLYGSGDAVVGINPASDSLPL  
LEKLNHMLDDVIQRFAIP--TQSCVLTHVTNTLRLIERG-APVDLVFQSIAGTEAANS GF  
GINLALLAEAQAALSLNRGT-----LGNNVMYFETGQGSCLSSNAHHG-----VD  
QQTCEARAYAVARHFSPLL-----INTVVGFIGPEYLYDGKQIIRAGLEDH  
FCGKLLGLPLGCDVCYTNHAEADQDDMDTLLTLLATAGLTFLLIGVPGADDIMLNYQSTSF  
HDALYIRELLGLKHAPEFADWLTKMQITD-DLGRLRDTAANHPL--LL--ALQG-----EQ  
P-----

>gi|21231698|ref|NP\_637615.1| ethanolamine ammonia-lyase large subunit [Xanthomonas campestris pv. campestris str. ATCC 33913]

-----MSGFAFSAGGERF  
RF-----ADLKDLLAKATPARSGD-----  
QLAGLAAHSELQRVAAQMALAELPLRHFLDE-----AVVPYESDEVTRLIVDQHDA  
FAPVAHLTVGGFRDWLLGAQA---DDAALAALAPGLMPEMVAASVSKLMRVQDLILVAQKT  
RVVTRFRNTLGLRGRLLSTRLQPNHPTDDATGIAASVLDGLLYGNGDAVIGINPASDSLAA  
TTALLRMLDAVITGYGIP--TQACVLAHITTTIDAINRG-VPVDLVFQSIAGTEAANTS F  
GINLALLQGGLDAGLSQQRGS-----VGNNVMYFETGQGSALSANAHHG-----VD  
QQTCEVRAYAVARQFNPL-----VNTVVGFIGPEYLYDGKQIIRAGLEDH  
FCGKLLGVPMGCDICYTNHAEADQDDMDMLLTLGTAGINFIMGIPGSDVMLNYQTTSF  
HDALYARQALGLRPAPEFEHWLDTQGILRLRDGRFELGSEMPAP--FR--KALS-----  
----QLDAEQRG-----

>gi|220919791|ref|YP\_002495094.1| Ethanolamine ammonia lyase large subunit [Methylobacterium nodulans ORS 2060]

-----MATYQCTLGGERH  
TF-----ADLKAVLAAASALKSGD-----  
ELAGIAAANSKVRMAARFVLADTPLMTFLED-----LVVPYEDDEVTRLIIDSHDRNA  
FAPVASLTVGGLRDWLLSEAA---DETALALAPGLTPEMVAASVSKLMRNQDLISVASKC  
RVVTAFRNTLGLRGRLLATRLQPNHPTDDARGIAASVLDGLLYGVDVAVIGINPATDSVSN  
AIALMEMLDAVRQEYRIP--TQTCVLTHVTNCIEIMNRG-APVDLVFQSVAGTEAANRGF  
GVDLNVLHEAYDAARGLNRGS-----VGQNAMYFETGQGSALSSGSHHG-----VD  
QQTVETRAYAVARAFAPLL-----VNTVVGFIGPEYLYDGKQITRAGLEDH  
FCGKLLGLPMGCDVCYTNHAEADQDDMDGLMTLLSAAGCTFLIAPGSDDIMLNYQSLSF  
HDVLYLRSLLVRAAPEFEAWLQEMGVND---GRTAARNQTQLEARFM--GRLIDGAA--

>gi|86748840|ref|YP\_485336.1| ethanolamine ammonia lyase large subunit [Rhodopseudomonas palustris HaA2]

-----MLYRHAIGNVAY  
VF-----DNLRDLLARATPPRSGD-----  
RLAGVAADSAEQMVAARMALAEVPLRQFLNE-----TVIPYEDDEVTRLIVDSHDAQS  
FAPIAALTVGGFRDWLLSDAA---TPATLAAIARGVTPEMAAVSKLMRNQDLILVAKKC  
SVVTRFRNTIGLPGRMSVRLQPNHPFDDVRGITASTLDGLLLGAGDACIGINPASDDPAV  
LGQLVRLDDVITRLAIP--TQSCVLTHVTTSLRLMEEG-VPVDLVFQSIAGTEAANRSF

SupplementalMultipleSequenceAlign.txt

GIDLSILKEAHDAGLSLKRGT-----VGENVMYFETGQGSALSADAHHG-----VD  
QQTCEARAYAVARAYAPLL-----VNSVVGFIGPEYLYDGKEIIRAGLEDH  
FCGKLLGLPLGVDICYTNHAEADQDDMDTLLTLLATAGVSFIMGVPGADDVMLNYQSTS  
FDALYVRELLGLKRAPEFDDWLVRTGLSQ-ADLRLTAADGRLPD--FA-ARLIA-----  
-----  
-----  
-----

>gi|91792433|ref|YP\_562084.1| ethanolamine ammonia lyase large subunit [Shewanella  
denitrificans OS217]

-----MYQHSVAGQNY  
RF-----NDLTQLLAKASPARSGD-----  
NLAGIAAAETERMAAKMCLAEQPLKIFLQD-----LLIPYEDEVSRLIIDNHQMSA  
FLTISHLTVGDFRNWLLLDST---CSQTL SAVCAGITPEMAAAVSKIMRNQDLIKVAKKC  
FNPTAFRNSLGLTQGLSSRIQPNNPTDDPRGIAASLLDGLLYGCGDAVIGINPASDSLPL  
LERLYYLLDEVISHYQIP--TQSCILTHVSNQIQLIEQG-APVDLVFQSIAGTEKANDSF  
GINLALLQEAQSAALALARGT-----VGNL MYFETGQGAALSANSHHG-----ID  
QQTCEARAYGVARHFSPLL-----VNSVVGFIGPEYLYDSKQIIRAGLEDH  
FCGKLLGLPMGCDVCYTNHAQADQDDIDSLMILLANAGVTFIMGVPGDDIMLSYQSTS  
HDILYLRQVCGLSAAPEFELWLQKMLMD-PQGKMLTVTAKHPL--FK--ELPQ-----  
-----RLAQRPL-----  
-----  
-----

>gi|116254098|ref|YP\_769936.1| putative ethanolamine ammonia-lyase heavy chain  
[Rhizobium leguminosarum bv. viciae 3841]

-----MTTYSIVLGRERH  
VF-----QDLKSVLACASPLKSGD-----  
VLAGIAASSNERRVAARYLLADMPLKTFLED-----LVIPYEIDEVSRLIIVDRHDWMA  
FASVSHMTVGEFRDWLLSYDA---TSEKLLAIAPGLTPEMVAAVSKIMRNHDLITVAGKC  
RVVTAFRSTIGLPGRLSSRLQPNHPTDDPEGVAGSTLDGLLYGIGDAVIGINPATDNLEA  
CTRLMVLFDRLRERFEIP--TQSCVLTHVTTSIKAIIEAG-APLDLVFQSIAGSEAANKGF  
GVDLAVLREGQQAALSMKRGT-----VGNVMYLETGQGSALSADAHHG-----VD  
EQTIE TRAYAVARELNPLL-----VNTVVGFIGPEYLFDAKQIIRAGLEDH  
FCGKVLGVPMGVDVCYTNHAEADQDDMDNLMVLLTVAGVSFLI AVPGADDVMLNYQSLSY  
HDIVGLRHQFNRPPEFEAWLHRMGMLD-HTGRLAPASASGAF--SR--NLLS-----  
-----YRASA-----  
-----  
-----

>gi|222107180|ref|YP\_002547971.1| ethanolamine ammonia-lyase large subunit  
[Agrobacterium vitis S4]

-----MAAYSII LGRERH  
VF-----DDLKSLMACASPPKSGD-----  
QLAGIAASSNERRVAARYVLADLPLKTFQLD-----MLIPYEIDEVTRLIIDSHDVA  
FASVSHMTVQGFRDWLLSYEA---TSEVLAALAPGLTPEMVAAVSKLMRNHDLITVAAC  
SVITAFRSTIGLSGRLSSRLQPNHPTDDPEGVAGSTLDGLLYGVGDAVIGINPASDNLEA  
CTRLMHLFDKLRDRFEIP--TQSCVLTHVTTSIQAIIEAG-APLDLVFQSVAGTQAANKGF  
GVDLAVLREGREAALSLKRGT-----VGDNVMYLETGQGSALSADAHHG-----VD  
EQTLEVRAYAVAREVKPLL-----VNTVVGFIGPEYLYDAKQIIRAGLEDH  
FCGKLLGVPMGVDVCYTNHAEADQDDMDNLMVLLTVAGVNFLI AVPGADDVMLNYQSLSY  
HDIVGLRHQFNRPPEFEAWLKRGMID-RSGRLAPLPQSNAF--SR--NLLS-----  
-----YKASA-----  
-----  
-----

>gi|39936810|ref|NP\_949086.1| ethanolamine ammonia lyase large subunit  
[Rhodopseudomonas palustris CGA009]

-----MIYRHSIGNVSF



SupplementalMultipleSequenceAlign.txt

VF-----DDLRLAKASPPRSGD-----  
RLAGIAADSAEQMVAARMALANLPLRQFLSE-----MVIPEAEDEVTRLIADRHDA  
FAPVASLTVGGFRDWLLSDAA---TPVALAALAPGLTPEMVAAVSKLMRNQDLILVAKK  
SVVTRFRNTIGLPGRMSVRLQPNHPFDDARGITASILDGLLL GAGDACIGINPASDDPAV  
LGQLVRLDDIIAHLAIP--TQGCVLTHVTTTLRLIEQG-APVDLTFQSIAGTEAANRSF  
GIDLALLAEAHQATLAQKRG-----VGDNVMYFETGQGSALSANAHHG-----VD  
QQTCEARAYAVARAFSPLL-----VNSVVGFIGPEYLYDGKQIVRAGLEDH  
FCGKLLGLPLGVDICYTNHAEADQDDMDTLLTLLAAAGVNFIMGVPGADDVMLNYQSTS  
FDALYVRDLFGLKRAPEFDDWLIRAGFSGPDHRPLTDGALLPEI--AA--RLIA-----

>gi|90423219|ref|YP\_531589.1| ethanolamine ammonia lyase large subunit  
[Rhodopseudomonas palustris BisB18]

-----MIYRHTIDHHSF  
VF-----ADLRDLAKATPARSGD-----  
RLAGLAADSAEQMIAARMALAEPLRQFLNE-----AVVPYETDEVTRLIILSDHAAA  
FAPIATLTVGGFRDWLLSDAA---TPAVLAGIARGVTPEMAAVSKLMRNQDLILVAKK  
AVVTRFRNTIGLNGRMSVRLQPNHPFDDERAITASVVDGLTLGSGDACIGINPASDDPAV  
LGRLVQLDDIITRFQIP--TQSCVLTHVTTTSLIEQG-LPVDLVFQSIAGTEAANRSF  
GVDLALLKQAHQAGLSLARGS-----VGNVMYFETGQGSALSANAHHG-----VD  
QQTCEARAYAVARAFDPLL-----VNSVVGFIGPEYLADGKQIIRAGLEDH  
FCGKLLGLPLGVDICYTNHAEADQDDMDTLLTCLAAAGVTFIMGIPGADDVMLNYQSTS  
FDALYVREL FGLKRAPEFDDWLLRAGLAD-ADFRLSERELLLPE--FA-ARLIA-----

>gi|114328555|ref|YP\_745712.1| ethanolamine ammonia-lyase heavy chain [Granulibacter  
bethesdensis CGDNIH1]

-----MASHTATAGGERH  
RF-----DDLKSVLAAATPRRSGD-----  
ELAGLAASSDAQRVAARFVLADLPLRSFLNE-----AVVPYEVDEVTRLIIDTHDAAA  
FAPIAHLTVGGFREWLLSHEA---DAAALA AVAPGITPEMAAVCKLMRNQDLIAVARKC  
RVIAGFRNTLGLLEGLRATRLQPNHPTDDL R GIAAATLDGLLYGTGDAVIGINPASDNV  
PN CIALLEMLDEL RQRYSIP--TQSCVLTHVTNALEIMKRG-APVDLVFQSIAGTEAANR  
GF GIDLAILRESHEAALSLKRG-----VGNVMYFETGQGAALSADAHHG-----LD  
QQTVEVTRAYAVARAFNPLL-----VNTVVGFIGPEYLYDGKQIIRAGLEDH  
FCGKLLGLPMGCDVCYTNHAEADQDDMDTLLMTLLTVAGVTFLIAVPGADDVMLNYQSL  
SF HDALYLRVSLGVKAAPEFETWLEQMDLKD-RSGRIRALPPQDER--VV--RLIA-----  
----EATSHG-----

>gi|83592368|ref|YP\_426120.1| ethanolamine ammonia-lyase heavy chain [Rhodospirillum  
rubrum ATCC 11170]

-----MGLYRATVGGTRY  
DF-----ADLRVTMACASPPRSGD-----  
ELAGLAAESDAQRMAARLVADLPLRAFLDT-----PLVPYESDEVTRLIIDTHDGAA  
FAPVASLTVGGFRDWLLSYAA---DSAALAALAPGLTPEMVAAVSKLMRNADL IAVA  
AKC QVITGFRNTLGLPGRLASRLQPNHPTDDPAGIAASTLDGLLFGMGDAVIGINPATDNV  
GACVTLLEMLDAVRQFDIP--SQSCVLTHVTNSIEAINRG-APLDLVFQSVAGTEAANAG  
F GISLSLLGEAREAALSLRRGT-----VGDNVMYFETGQGAALSADAHHG-----VD  
QQTVEVRAYAVCRAFKPLI-----VNTVVGFIGPEYLYDSKQIIRAGLEDH  
CCGKLLGLPMGVDVCYTNHAEADQDDMDTLLMTLLGVAGVTFLIGVPGADDVMLNYQSL  
SY HDILGLRHLLDRRPAPEFADWLARMGMSD-AGGRLPPLDASAPA--LR--RLLA-----  
-----SGG-----

SupplementalMultipleSequenceAlign.txt

>gi|209544507|ref|YP\_002276736.1| Ethanolamine ammonia lyase large subunit  
[Gluconacetobacter diazotrophicus PA1 5]

-----MPYRIILDSERY  
NF-----AHLRHVLACASPARSGD-----  
ELAGLAAADPVERMAARHVLADIPLRDFLND-----VPVPYEDDEVTRLIVDTHDAAS  
FAPVAHMTVGQFRDWLLSYTA---DGDAITALGPGLTPEIVSAVSKLMRNQDLIAARKI  
RVVTAFRNTQGLPGRLGTRLQPNHPTDDARGIAASLLDGLLLGVGDAVLGINPATDSIAN  
GIVLLDMLEQVRTRYAIP--AQTCVLTHITNAIAMMARG-APVDLVFQSVAGTQAANAGF  
GVSLSVLAEAHDAARSLNRGT-----VGHNVMYFETGQGSALSAGAHHG-----MD  
QQTAEVRAYAVARAFSPLL-----VNTVVGFIGPEYLYDGKQIIRAGLEDH  
FCGKLMGLPMGCDACYTNHAEADQDDMDNLMMLLTVAGVNFLIAVPGGDDVMLSYSLSH  
HDMLTLRSSFGVRAAPEFEAWLHEMNLDD-PDGRLRVNAPQSLG--RI--LGPG-----  
-----  
-----  
-----

>gi|27378105|ref|NP\_769634.1| ethanolamine ammonia-lyase heavy chain [Bradyrhizobium  
japonicum USDA 110]

MQNEDGRGVNAPLSLVERKVSYSVLIIRYSFRIVLESAGFRRTPEGTLVYRHTIDATTY  
AF-----PDLRDLLAKATPPRSGD-----  
RLAGIAAASAEQMIARMALADVPLGQFLQE-----ALIPYETDEVTRLVIDSHDARA  
FAPVASLTVGAFRDWLLSDAA---TPEILRKLAPGITPEMAAAVSKLMRNQDLILAARKC  
EVTTAFRNTIGLKGRMSTRLQPNHPFDDARGITASILDGILLGAGDACIGINPASDDPTV  
IAQLLRLLDEIARLKLKLP--TQGCVLTHVTTTSLIGQG-VPVDLVFQSVAGTEAANRSF  
GVDLDDLREAQEAGRSQRRGT-----VGQNVMYFETGQGSALSANAHHG-----VD  
QQTCEARAYAVARAYAPLL-----VNSVVGFIGPEYLYDGKEIIRAGLEDH  
FCGKLLGLPLGVDICYTNHAEADQDDMDNLLTLLAAAGVTFIMGVPGADDVMLNYQSTSF  
HDALYVRDVFLRRRAPEFDDWLAQSGIVG-ADFRLAGDAGLLPD--FA-SRLIA-----  
-----  
-----  
-----

>gi|115523822|ref|YP\_780733.1| ethanolamine ammonia lyase large subunit  
[Rhodopseudomonas palustris BisA53]

-----MIYRHAIGQHV  
LF-----NDLRDLLAKASPIRSGD-----  
QLAGIAAQSAAEQMIARMALAEPLRQFLAE-----AVIPYESDEVTRLIVDGHDA  
FAPVAALTVGEFRDWLLSDQA---TPAVLARLAPGLTPEMAAAVSKLMRNQDLILAANKI  
AVTTRFRNTIGLPGRFSTRLQPNHPFDDERAITASILDGLMLGSGDACIGINPASDDPAV  
IGRLVALLDELITRWRIP--TQGCVLTHLTTTLGLIEQR-LPVDLVFQSIAGTEAANRSF  
GVDLALLREGHDAGLSMKRGS-----VGDNVMYFETGQGSALSANAHHG-----VD  
QQTCEARAYAVARAFDPLL-----VNSVVGFIGPEYLADGKQIIRAGLEDH  
FCGKLLGLPIGVDICYTNHADADQDDMDTLLTCLAAAGVTFIMGVPGADDVMLNYQSTSF  
HDALYVREVFGKRRAPEFDLAWLVQVGLAD-EDAQLAERDALLPE--FA--SRLI-----AA  
P-----  
-----  
-----  
-----

>gi|162146138|ref|YP\_001600597.1| putative ethanolamine ammonia-lyase heavy chain  
[Gluconacetobacter diazotrophicus PA1 5]

-----MPLSARDKLLSGNQSHSLQISERASLFGKRRRIIPTVPYRIILDSERY  
NF-----AHLRHVLACASPARSGD-----  
ELAGLAAADPVERMAARHVLADIPLRDFLND-----VPVPYEDDEVTRLIVDTHDAAS  
FAPVAHMTVGQFRDWLLSYTA---DGDAITALGPGLTPEIVSAVSKLMRNQDLIAARKI  
RVVTAFRNTQGLPGRLGTRLQPNHPTDDARGIAASLLDGLLLGVGDAVLGINPATDSIAN  
GIVLLDMLEQVRTRYAIP--AQTCVLTHITNAIAMMARG-APVDLVFQSVAGTQAANAGF  
GVSLSVLAEAHDAARSLNRGT-----VGHNVMYFETGQGSALSAGAHHG-----MD  
QQTAEVRAYAVARAFSPLL-----VNTVVGFIGPEYLYDGKQIIRAGLEDH

SupplementalMultipleSequenceAlign.txt

FCGKLMGLPMGCDACYTNHAEADQDDMDNLMMLLTVAGVNFLIAVPGGDDVMLSYSLSH  
HDMLTLRSSFGVRAAPEFEAWLHEMNLDD-PDGRLRVNAPQSLG--RI--LGPG-----

>gi|111224925|ref|YP\_715719.1| ethanolamine ammonia-lyase, large subunit [Frankia  
alni ACN14a]

-----MHRRATCVRGRSASASGSRLGREVAAVAYRMTVRGERH  
VF-----ADLAELFAKANEKSGD-----  
QLAGIAAGSARQRVAAKLALADVTLGEIVAA-----PLIDDAVTDLILRGQDAAL  
FAPLASLTVGEFRELVLSPSF--PARWRDDGLARAITPEIAAATAKIMSDKDLICAAKPL  
RTVTRCRNTIGEAGVLGVRVQPNHPADDLEGILLSVLDGLLHGCGDAVLGVNPARESEVQ  
VGTILRGLGALVDALALP--TQTCVLAHLTTQLAALAAG-APVDLLFQSVAGTEAANTSF  
GITLDLLAEGREAVLAHHRD-----RSGDFVGEQVMYFETGQGSALSADAHHG-----VD  
QLTCEARAHGVARAFDPFL-----VNSVVGFIGPEYLADARQITRAGLEDH  
FVGKLLGLPMGCDVCYTNHVDADQNTNDDLLVLLVAAGCTFVMGVPSADDVMLGYQSTSY  
HDAAGMRELFNLHAAPEFTAWLTDGRLL--VDGHLADPTGPVAA--LL--TAGL-----DD  
ALAALPTRPALPSGPTR-----

>gi|222080799|ref|YP\_002542527.1| ethanolamine ammonia-lyase large subunit  
[Agrobacterium radiobacter K84]

-----MPYTTTIENTVF  
RF-----GDLKDLLAKATPERSGD-----  
QLAGIAASGPVERLAAQMALADLPLKAFLE-----EVISSDDDEVSALIAARHDA  
FAPISLTVGEFREWLLKPET--GQRALEAVTYGVTPEMVAAVSKIMRLQDLISVAAKR  
EVVTRFRNTIGLRGRLSTRNQPNHPTDDSRGIAASAIDGLLMGSGDAVIGVNPATDSVAD  
YIRIVSLLDELRELAIP--TQTCCLGHVTTAIRAIEAG-APVDLVFQSVAGSQKANAGF  
GIDLSLLKEAYEAGRSLKRGM-----PGANVMYFETGQGAALSADAHFG-----VD  
QQTMEVRAYAVAREFDPM-----VNTVVGFIGPEYLFNGKQIIRAGLEDH  
FCGKLLGLPMGVDVCYTNHADADQEDMDTLLTLLCAANVNFVITVPGADDIMLNYQSLAH  
HDAIYCRETLNRAPAPEFERWLCEIGLTD-RAGALVGAPAMLT--YF--SSST-----  
----LVGA-----

>gi|169629874|ref|YP\_001703523.1| ethanolamine ammonia-lyase, heavy subunit  
[Mycobacterium abscessus]

-----MKYRQQVAGVNY  
AF-----DGLVDVMAKATPLRSGD-----  
ELAGCAAGSDAERAAAOWLADLPLDTFLNE-----AVVPYESDEVTRLIIDSHDRGA  
YSAVSHLTVGGFRDWLLESASRDDGARRIAEVSAGITPEMAAAVSKIMRNQDLIAVGAAM  
HVSAAFRTTIGGKGTLATRLQPNHPTDDPRGVAAAVLDGLLGCGDAVIGINPATDSPEA  
TGDLLKLLDSIRSRYDIP--TQSCVLSHITTTIIGLIERG-APVDLTFQSIAGTEGANSF  
GVDIALLREGRDATRALRRGT-----VGDNVMYLETGQGSALSSRAHLGAGGKPV  
QQTLEARAYAVARDLEPFL-----VNTVVGFIGPEYLYDGKQIVRAGLEDH  
FCGKLLGLPMGVDVCYTNHAEADQNDMDTLLILLAAAGVAFVITVPGADDVMLGYQSLSF  
HDVLQARRTLGLRPAPEFEQWLHAIGMVD-DDGRLTPFDVTSSP--LR--ALTI-----  
----SGAR-----

>gi|118470052|ref|YP\_885934.1| ethanolamine ammonia-lyase, large subunit  
[Mycobacterium smegmatis str. MC2 155]

-----MRYRQQVSGVTY  
TF-----DGLVEVMAKATPLRSGD-----  
QLAGCAAHEHGERAAAOWLADLPLDVFLNE-----ELVPYDTDEVTRLIMDTHDRQA

SupplementalMultipleSequenceAlign.txt

FSSVSHLTVGGFRDWLLDVAEEDDSAARLA AVAPGLTPEMVA AVSKIMRNQDLIAVSAAA  
RVTAALRTTVGIPGTMATRLQPNHPTDDPRGIAAAVLDGLLLGCGDAVIGINPATDSPQA  
TADLLYLLDGIRTRYDIP--AQSCVL SHITTTIGLIEAG-APVDLVFQSIAGTEGANTAF  
GVNLQLLREGNEAARSLNRGT-----VGNNVMYLETGQGSALSSGAHLGVGGKPV  
QQTLE ARAYAVARDL SPL-----VNTVVGF IGPEYLYDGKQIIRAGLEDH  
FCGKLLGLPMGV DVCYTNHAEADQNDMDTLLMLLAAAGVAFVITVPGADDVMLGYQSLSF  
HDV LVARRTLGLRPAPEFETWLRKVG MVD-DAGRLTPFDVSRSP--LR--ELTV-----  
-----AEAS-----  
-----  
-----  
-----  
-----

>gi|183980689|ref|YP\_001848980.1| ethanolamine ammonia-lyase large subunit, EutB  
[Mycobacterium marinum M]

-----MSYRQTISGTTY  
AF-----DGLVDVLAKATPLRSGD-----  
QLAGCAA EHAERAAA AAVLAD MPLTTFLSD-----VVVPYETDEVTRLIIDSHDRQA  
FAPISHLTVGGLRDWLLD TAARDDSAARIAAIAPGLTPEMVA AVCKIMRNQDLILVAAAT  
TATAAFRTTIGLPGRLATRLQPNHPTDDPRGIAAGMLDGLLMGCGDAVVGINPATDSPQA  
TADLLHLLDDIRQRFEIP--MQSCVLCHVTTTTTELIDKG-VPVDLVFQSIAGTEGANSSF  
GVNIPMLLEANEAAARSLGRGT-----VGDNVMYLETGQGSALSAGAH LGTGGKPV  
QQTLE ARAYAVARTLQPLL-----INTVVGF IGPEYLYDGKQIIRAGLEDH  
FCGKLLGLPMGV DVCYTNHAEADQDDMDTLLTLLGVAGAAFVIAVPGADDIMLGYQSLSF  
HDPLYVRQVLR LRPAP EF EAWLTGLGMAD-ANGRILPIDLATSP--LR--ALAT-----  
-----GA-----  
-----  
-----  
-----  
-----

>gi|169630908|ref|YP\_001704557.1| ethanolamine ammonia-lyase, large subunit  
[Mycobacterium abscessus]

-----MSTFRHIAGPVTY  
QF-----GSLAEVLAKASPPRSGD-----  
ELAGCAAHSDAERAAARWVLA EVPLAAFLTE-----EIVPYDTDEVTRLIIDSHDAAA  
FAVISHLTVGDFRDWLL ETITKPHGAQILKEVSPGLTPEMVA AVSKLMRNQDLIAVGA AV  
RNHSAFRTTIGLPGTLATRLQPNHPTDDARGIAAATLDGLLLGCGDAVIGINPATDSPHA  
AGDLLRLIDDIRLRFDIP--TQSCVLAHVTTTTIELIERN-LPVDLVFQSIAGTEGANESF  
GVNLALLREANEAGRSLSRGT-----VGNNVMYLETGQGSALSAGAH LGVGGVAVD  
QQTLE ARAYAVAREVEPLL-----VNTVVGF IGPEYLYDGKQIIRAGLEDH  
FCGKLLGLPMGV DVCYTNHAEADSDMDVLLTVLTAAGVAFVIAVPGADDVMLGYQSLSF  
HDALFARRTFGLRPAPEFNDWLERMGMLE-RDGGLREIAVSDSP--LR--ALI-----  
-----  
-----  
-----  
-----  
-----

>gi|111023047|ref|YP\_706019.1| ethanolamine ammonia-lyase heavy chain [Rhodococcus  
jostii RHA1]

-----MTTYSHG VAGTGY  
TF-----DGLVDLMAKATPLRSGD-----  
ELAGCAA SDAERAAAQWALADVPLGTFLNE-----LVVPYEDDEVTRLIIDSHDRVA  
FGEISHLTVGGLRDWLLDVAARDGAAETFRRVAPGLTPEMVA AVSKIMRNQDLIAVARAV  
TVTAGFRTTIGVPGHLGTRLQPNHPTDDPRGIAAATLDGLLLGCGDAVIGINPATDSPHA  
TAELLHLLDDIRQRFDIP--AQSCVLSHVTTMGLIEEG-VPVDLVFQSIAGTQGANSSF  
GVDISLLREANAAGRSLKRGT-----VGDNVMYLETGQGSALSAGAH LGTGGRPVD  
QQTLE TRAYAVARDLEPLL-----INTVVGF IGPEYLYDGKQIIRAGLEDH  
FCGKLLGLPMGV DVCYTNHAEADQDDMDTLLTLLGVAGAAFVIAVPGADDVMLGYQSLSF  
HDVLYARQVLR LRPAP EFEDWMRRLGMVD-DAGRVL PVDAASP--LR--ALTV-----  
-----AR-----  
-----  
-----  
-----  
-----

SupplementalMultipleSequenceAlign.txt

>gi|54024156|ref|YP\_118398.1| putative ethanolamine ammonia-lyase large subunit [Nocardia farcinica IFM 10152]

-----MTYHQSVSGRNY  
SF-----GSLVEVLAKATPLRSGD-----  
QLAGCAAESDAERAAACWVLADLPLTTFLDE-----QVVPYETDAVTRLIVDGHDRRA  
FAPIAHLTVGGFRDWLLATAAGPDAAATLSGVAAGLTPEMVAAVSKLMRNQDLIAVAKAA  
TVTSAFRTTIGLPGRIATRLQPNHPTDDPRGIAAATLDGLLMGCGDAVIGINPATDSPRA  
TADLLHLLDDIRTRFDIP--MQSCVL SHVTTTMAIERN--VPVDLVFQSIAGTEGANASF  
GITLPLAEANEARS LGRGT-----VGDNVMYLETGQGSALSAG AHLGTGGLPVD  
QQTLE ARAYAVARALDPLL-----VNTVVGF IGPEYLYDGKQIIRAGLEDH  
FCGKLLGLPMGV DVCYTNHAEADQDDMDTLLTLLGVAGAAFVIAVPGADDVMLGYQSLSF  
HDALYVRQVLGLRAAPEFETWLHGLGMAD-EAGRIRPVDAASP--LL--ALTT-----  
-----R-----  
-----  
-----  
-----

>gi|126642149|ref|YP\_001085133.1| ethanolamine ammonia-lyase heavy chain [Acinetobacter baumannii ATCC 17978]

-----MTLADVPLKTFLE-----VVIDYETDEITRLIIDEHDLAA  
FAPISHFTVGD FRNWLLGEDA---TPESLKALASGLTPEMVAAVSKIMRNQDLIYVASKC  
EVVTQFRNTIGLKGHLSTR LQPNHPTDDVLGISASILDGLMYGNGDAVIGINPATDNLHN  
LSELLKLLDHV IQEYQIP--TQSCVL THISSGIQLAEKN--VPIDL MFQSIAGTQLANEGF  
GISL DLLQEGYEATLSLKRGT-----IGQNVMYFETGQGSALSSNAHHG-----VD  
QQTLETRAYAVARKYNPLL-----VNTVVGF IGPEYLFNGKQIIRAGLEDH  
FCGKLLGVPMGCDICYTNHADADQNDMDVLLTLF GAAGINFIMGIPGSDVMLNYQTTSF  
HDALYLRQLLGLKPAPEFSAWLEQQGIFKQNSQICWADHMPDQ--FS--RLLM-N-----  
-----  
-----  
-----

>gi|170749715|ref|YP\_001755975.1| ethanolamine ammonia lyase large subunit [Methylobacterium radiotolerans JCM 2831]

-----MAYATTIEGTRF  
TF-----PDLRSL LAKATPERSGD-----  
QLAGLCAEGPVERLAAQIALADLPLKTF LAE-----ELIPSEDEEVSDLIARRHDA  
FAPVSSLTVGAFREWLLAPAA---DARALAALSPGLTPEMVAAVSKICRLQDLVAVAAKR  
PVVTRFRSTIGLPGRLATRNQPNHPTDSSEGILISALDGLLMGSGDAVIGVNPATDSL PD  
YIRIVELLETLRLRLDVP--TQHCCLGHVTV AIEAMARG-APVDLVFQSVAGS QKANAGF  
GVDLAVLREASQAARALGRCP-----EGGQFMYFETGQGSALSADAHWG-----VD  
QQTMEARAYAVAREFDPLL-----VNTVVGF IGPEYLYNGKQIIRAGLEDH  
FCGKLLGLPMGV DVCYTNHADADGEDMDALLTLLCAAGVNFVITVPGADDVMLNYQSLSH  
HDAVFARETLGRPPAPEFEAWLRV RITD-AQQQLASAAGVLPQ--AL--AEAS-----  
-----RLLPGRAA-----  
-----  
-----

>gi|89055068|ref|YP\_510519.1| ethanolamine ammonia-lyase heavy chain [Jannaschia sp. CCS1]

-----MGYRTDISGTRY  
TF-----ASLKRL LAKASPERSGD-----  
HLAGLAADSPLERLAAQMCLADAPLRDFLDD-----VLEVDGDAVSRLIADQHDAQA  
FESISALTVGGFRDWLLDPGV---TGVELAQIAWGLTPEMVAAVSKIMRAQDLIAVA AKI  
EVVTRFRSTIGLRGLSTRNQPNHPTDDSRGIALSALDGLLMGAGDAVIGVNPATDSVED  
FTRVCEVLEAIRTQLDIP--TQHCCLGHVTTALAAMERG-APVDLVFQSVAGSQAANDGF  
GVTLEMLDEAHAAARALGRAP-----DGANLMYFETGQGAAL SANAHHG-----MD  
QQTMETRAYAVARRYKPLL-----VNTVVGF IGPEYLADGKQIIRAGLEDH  
FCGKLLGLPMGV DVCYTNHSYADQEDMDILLTLLAAAGVSFVITVPGADDIMLNYQSLSF  
HDAH FIRDTLGRPPAPEFAAWMEANGIGS-ADVRLPPLETALAQ--LR--LPGS-----  
-----

SupplementalMultipleSequenceAlign.txt

>gi|118579639|ref|YP\_900889.1| ethanolamine ammonia lyase large subunit [Pelobacter propionicus DSM 2379]

-----MKRFLIAAMLVVGILTLSTNSHAI A I K S V K P G E D V F K Y I Q R V K G - S F  
DQ-----VLYQQVIGASNAFKEGD-----  
KTIGVAADTNTSRENARKLLANTKIKDITNH-----PLHNDLYKFIKSVDPAQ  
YAKIKDWTMGRMKAFLLDK-----SEAEIKSVMYGMNSEVVGCLPKLMSNKELIAVNRKI  
FNPLP-GTKIGAKGYLSARIQNSPTDDPEEIMMQVLSAFSYGVGDLVLTGPNVDGTKEQ  
TARVEASLKDVVDTFKLNGTIPWCVLAHIDVQREIFNEKPELIDCMFQSLAGTDTANKTF  
DISVEKMDVHAKSRAGQRYGL-----YFETGQGSDFTNNGAEG-----VD  
MVLLESRKYGMARGLQQVL---AQVQPQAYLHVNDVAGFIGPEVFRTKEQLVRCLEDI  
LMGKLQGITIGLDICSTLHMSVSLDDLWCQDQIMPANPAYLMALPTRNDPMLSYLTTSY  
QDHVIRIRSKFGYKVNMTMDDFFKRIQVID-KNGKPTKHFDPPIWVYQYCKAKGDRSQQ  
EIMAEGKQKFDIHNWTKTGKVPPLASGYGKNIWDLNPQLDKKIRELYADAKKAIWAEF  
TPEFLKSVPSVQLGTL SKDRENYIVHPETGEQLNKQSVATLQKLRDSWQGTDPDVQIVV  
SDGLNAKSI MAPEHTLPYITALRKELQAAGLTADKKNIVISSGRVRAGYMGVDVL FNNAD  
PGKARAVVHIIGERPGTQDAFSVYIAAPKGVWAEKKVDHNIVKVSQSGISKQATKPADA  
AKQTVKLIKELMAS---

>gi|116878401|ref|YP\_355897.2| ethanolamine ammonia-lyase, large subunit [Pelobacter carbinolicus DSM 2380]

-----MLQKGFVAGITGALVMTFLASMAGAVTIGGVKPGEDVMQYVNRKTKGK-F  
DQ-----TTYQQVIGAANAFKEGD-----  
EGLGVAADTEADRVNARKLLANTKIKDIFEN-----PLFVDGQEELIRKTTDKAK  
YNKIKNMTMGELKNFLLTK-----SEADIKAIMGGLHSDVIGSVVKLMSNDELIRVGSKI  
FNPLP-GSKIGAKGYIGARIQNSPTDNKEDIQMQVFDGFSYGVGDIIIGTNPVDSQLEA  
TLRVENALKEIVTAFGLEKTI PWCVL SHIDGQAAAEEKEEPGSTAIWFQSLAGTESANKTF  
DLTIQKM-----IDYAKMR-----TGPYSLYFETGQGADYTNHGHG-----FD  
MVVHESRKYGFSRALKQVTAKAKGVTEQVWLHVNDVAGFIGPEVFKTREQLVRCLEDI  
VMGKLHGLVGLDICSTLHMPVTLDDLAWCQDQIAPANPAYLMALPTRNDPMLSYLTTGF  
QDHVIREKFGFKVNDAMWDFYKKEIEVID-ANGKPTKHFDPAPVWYK--FRQA----KG  
DKRSFKEIYAEGQKKIANVRGRGVDLAVGYGENIWDLEPVTNKRIHDLYDDAKISLWAEF  
TPEFIDSIPNAVSIKSKAHRENYISAPGTGEEL SASAVATLDKLAASWGNKAPDVQVVI  
SDGLNAKAIMDDGHLMPYLKELKKQCKKAGLTLSDKNIVVTGGRVRAGYKAGETLFSKV-  
GSKAKAVVHIIGERPGSGHHAFSAYLVKVKPSTWAKTGSVDHSDSSKVLSGISDTGLVPAE  
AARQTVKLLMEM-----

>gi|108762129|ref|YP\_631356.1| ethanolamine ammonia-lyase, large subunit/small subunit [Myxococcus xanthus DK 1622]

-----MKSGEDVFGYVQRLRG-AF  
DD-----TLYKQVLGAANTFKEGD-----  
ALVGVAADENSANARRLLGHTRLEDVRRH-----PLHQDALHALSLEAEDSQA  
ATLTADWTLGRLRKFLLES-----DEAAIHAIGPGLGSDTIGCVVKLMSDAELIALGSKV  
FNPLP-GSKVARGYMGARIQNSPTDNVDDIRWQVFDGFSYAVGDVVLGCNPVSSTPES  
VAAIESALLEVLVTFGLTDVLPWCVLSHIDVQAEVERRQPGTTGVWFQSIAGSDSANATF  
DISVEKM-----LAYADGR-----TGPYGLYFETGQGADFTNNGHGHG-----YD  
MVLHESRKYGFARALSQRV--ARARQGAAPWVHLNDVAGFIGPEVFRTREQLVRCLEDI  
AMGKLHGLTIGLDICSTLHMDVSLDDLWCIERIMPANPAYLMSLPTKNDPMLGYLTTGF  
QDHVIREQFGYKVDWRMAFFQRLGVID-AEGKPTRHFDPVWVYLQ--YLRA----KG  
DSRPEADIRADAEQQLSAIRARGVPMARGHGHGHPWDL EPALDAELRRVYVDSKSLWTEL  
TPAFITAVPEGVRLVSKSQDRTEYILHPETGEQLDASSLEAVRAMRARHAGRYDVQLMVS  
DGLNALAIMDEGLAPYLETLRAALIAAGYQPAPEHLVLTSGRVRAGYRVGEALYAGMED  
AARHRGLIHVIGERPGTGHHTFSAYITAPSGAVWSQPGKVDHNITRVVSGVALTAYAPSL  
AAPETVRLQLLAPRGG

>gi|77918106|ref|YP\_355921.1| ethanolamine ammonia-lyase, large/small subunit fusion [Pelobacter carbinolicus DSM 2380]

-----MRLRSKFLYGITFGLALTFVASLAGAVAIRDVKPGEDVFAYVTRVKGQ-F  
DQ-----PLYQQVLGAANSFKEGD-----  
EAIGVAADDDASRENARKLLANTKIKDLMAK-----PLFVDAQYDLITNTTDMQAQ  
YKVKDWTGELKDFLLTK-----SESQIKGIMYGLHSDIIGNVVKMMSNDELTRIGQTV  
FNPLP-GSNIGAKGYLSARIQNSPTDNADDIVQVFDAYAYAVGDLVVGTPVDSEAN

SupplementalMultipleSequenceAlign.txt

```
IENIELALRDVMQTFDVKYNPWCVLSHIDVQAEVEKNNPGSTAIWFQSLAGVVDANKTF
DLTLQKM-----MDYARMR-----TGKYGLYHETGQGADFTNGHGKG-----FD
MVVHESRKYGFARALKQV-AAAQTDGQGAWCHVNDVAGFIGPEIFKTREQLVRCLEDI
AMGKHLHLIIIGLDICSTLHMPVTLDDLWCQDQIAPANPGYLMALPTKNDPMLSylTTAY
QDHVRMREKFGYKINDDMWNFFKKIEIID-ANGKPTHEFGDPIWVYK--YQLA----KG
DTRSMKEIYAEGQKKVDEIQARGVPLAIGYGENIWDLEPKTNKAIHDLYDDAKISLWAEF
TPEFIASIPNAVTVQTKSADREYVAHPSTGEEFSDAAVATLEKLRAAWGGKAPDVQIVL
SDGLNAKALMDEDHLMFMDLSEMAKAGWTVAKENIVVTSGRVVRAGYQAGDILFKDP-
ASTPKAIIHIIIGERPGSGHHAYSVMYTRVAPATWA-AGTVDHDVTKVISGISINTGLDPRK
AARQTVRLLQSM-----
```

%% EutC [targeting tail implicated]

>gi++|16765777|ref|NP\_461392.1| ethanolamine ammonia-lyase small subunit [Salmonella typhimurium LT2]

```
--MDQKQIEEIVRSVMASMGQ-----DVP
QPAAPSTQEGAKPQCAAPTVTESCALDLGSAEAKAWIGVENPHRADVLTELRRSTAARVC
TGRAGPRPRTQALLRFLADHSRSKDTVLKEVPEEWKAQGL-----LEV
RSEISDKNLYLTRPDMGRRLSPEAIDALKS-----QCVMPN-----DVQVVVS
DGLSTDAITANYEEILPPLLAGLKQA---G-LNVGTPFFVRYGRVKIEDQIGEILGAKVV
ILLVGERPGLGQSESLSCYAVYSPRVATTVEADRTCISNIH-QGGTPPVEAAAVIVDLAK
RMLEQKASGINMTR-----
```

>gi++|161612797|ref|YP\_001586762.1| ethanolamine ammonia-lyase small subunit [Salmonella enterica subsp. enterica serovar Paratyphi B str. SPB7]

```
--MDQKQIEEIVRSVMASMGQ-----DVP
QPVAPSTQEGAKPQCAAPTVTESCALDLGSAEAKAWIGVENPHRADVLTELRRSTAARVC
TGRAGPRPRTQALLRFLADHSRSKDTVLKEVPEEWKAQGL-----LEV
RSEISDKNLYLTRPDMGRRLSPEAIDALKS-----QCVMPN-----DVQVVVS
DGLSTDAITANYEEILPPLLAGLKQA---G-LNVGTPFFVRYGRVKIEDQIGEILGAKVV
ILLVGERPGLGQSESLSCYAVYSPRVATTVEADRTCISNIH-QGGTPPVEAAAVIVDLAK
RMLEQKASGINMTR-----
```

>gi++|197251424|ref|YP\_002147411.1| ethanolamine ammonia-lyase, light chain [Salmonella enterica subsp. enterica serovar Agona str. SL483]

```
--MDQKQIEEIVRSVMASMGQ-----DVP
QPVAPSTQAGAKPQCAAPTVTESCALDLGSAEAKAWIGVENPHRADVLTELRRSTAARVC
TGRAGPRPRTQALLRFLADHSRSKDTVLKEVPEEWKAQGL-----LEV
RSEISDKNLYLTRPDMGRRLSPEAIDALKS-----QCVMPN-----DVQVVVS
DGLSTDAITANYEEILPPLLAGLKQA---G-LNVGTPFFVRYGRVKIEDQIGEILGAKVV
ILLVGERPGLGQSESLSCYAVYSPRVATTVEADRTCISNIH-QGGTPPVEAAAVIVDLAK
RMLEQKASGINMTR-----
```

>gi++|16761375|ref|NP\_456992.1| ethanolamine ammonia-lyase small subunit [Salmonella enterica subsp. enterica serovar Typhi str. CT18]

```
--MDQKQIEEIVRSVMASMGQ-----DVP
QPVAPSTQEGAKPQCAAPTVTESCALDLGSAEAKAWIGVENPHRADVLTELRRSTAARVC
TGRAGPRPRTQALLRFLADHSRSKDTVLKEVPEEWKAQGL-----LEV
RSEISDKNLYLTRPDMGRRLSPEAIDALKS-----QCVMPN-----DVQVVVS
DGLSTDAITANYEEILPPLLAGLKQA---G-LNVGTPFFVRYGRVKIEDQIGEILGAKVV
ILLVGERPGLGQSESLSCYAVYSPRVATTVEADRTCISNIH-QGGTPPVEAAAVIVDLAK
RMLEQKASGINMTR-----
```

>gi++|56412659|ref|YP\_149734.1| ethanolamine ammonia-lyase small subunit [Salmonella enterica subsp. enterica serovar Paratyphi A str. ATCC 9150]

```
--MDQKQIEEIVRSVMASMGQ-----DVP
QPVAPSKQEGAKPQCASPTVTESCALDLGSAEAKAWIGVENPHRADVLTELRRSTAARVC
TGRAGPRPRTQALLRFLADHSRSKDTVLKEVPEEWKAQGL-----LEV
RSEISDKNLYLTRPDMGRRLSPEAIDALKS-----QCVMPN-----DVQVVVS
DGLSTDAITANYEEILPPLLAGLKQA---G-LNVGTPFFVRYGRVKIEDQIGEILGAKVV
ILLVGERPGLGQSESLSCYAVYSPRVATTVEADRTCISNIH-QGGTPPVEAAAVIVDLAK
RMLEQKASGINMTR-----
```

>gi++|161502393|ref|YP\_001569505.1| ethanolamine ammonia-lyase small subunit [Salmonella enterica subsp. arizonae serovar 62:z4,z23:--]

```
--MDQKQIEEIVRSVMASMGQ-----DVP
QPVAPSTQEGAKPQRAAPTATESCALDLGSAEAKAWIGVENPHRADVLTELRRSTAARVC
```

SupplementalMultipleSequenceAlign.txt

```
TGRAGPRPRQTALLRFLADHSRSKDTVLKEVPEEWVKAQGL-----LEV
RSEISDKNRYLTRPDMGRRLSQAIDALKS-----QCVMPN-----DVQVVIS
DGLSTDAITVNYEEILPPLMAGLKQA---G-LKVGTPFFVRYGRVKIEDQIGELLGAKVV
ILLVGERPGLGQSESLSCYAVYSPRVTTTVEADRTCISNIH-QGGTPPVEAAAVIVDLAK
RMLEQKASGINMTR-----
>gi++|26248816|ref|NP_754856.1| ethanolamine ammonia-lyase small subunit
[Escherichia coli CFT073]
--MDQKQIEEIVRSVMASMGQ-----
TAPAPSEAKCATTNCAAPVTSESCALDLGSAEAKAWIGVENPHRADVLTELRRSTVARVC
TGRAGPRPRQTALLRFLADHSRSKDTVLKEVPEEWVKAQGL-----LEV
RSEISDKNLYLTRPDMGRRLCAEAVEALKA-----QCVANP-----DVQVVIS
DGLSTDAITVNYEEILPPLMAGLKQA---G-LKVGTPFFVRYGRVKIEDQIGELLGAKVV
ILLVGERPGLGQSESLSCYAVYSPRMATTVEADRTCISNIH-QGGTPPVEAAAVIVDLAK
RMLEQKASGINMTR-----
>gi++|16130365|ref|NP_416935.1| ethanolamine ammonia-lyase, small subunit (light
chain) [Escherichia coli str. K-12 substr. MG1655]
--MDQKQIEEIVRSVMASMGQ-----
AAPAPSEAKCATTNCAAPVTSESCALDLGSAEAKAWIGVENPHRADVLTELRRSTVARVC
TGRAGPRPRQTALLRFLADHSRSKDTVLKEVPEEWVKAQGL-----LEV
RSEISDKNLYLTRPDMGRRLCAEAVEALKA-----QCVANP-----DVQVVIS
DGLSTDAITVNYEEILPPLMAGLKQA---G-LKVGTPFFVRYGRVKIEDQIGELLGAKVV
ILLVGERPGLGQSESLSCYAVYSPRMATTVEADRTCISNIH-QGGTPPVEAAAVIVDLAK
RMLEQKASGINMTR-----
>gi++|218700906|ref|YP_002408535.1| ethanolamine ammonia-lyase, small subunit (light
chain) [Escherichia coli IAI39]
--MDQKQIEEIVRSVMASMGQ-----
AAPAPSEAKCATTNCAAPVTSESCALDLGSAEAKAWIGVENPHRADVLTELRRSTVARVC
TGRAGPRPRQTALLRFLADHSRSKDTVLKEVPEEWVKAQGL-----LEV
RSEISDKNLYLTRPDMGRRLCAEAVEALKA-----QCVANP-----DVQVVIS
DGLSTDAITVNYEEILPPLMAGLKQA---G-LKVGTPFFVRYGRVKIEDQIGELLGAKVV
ILLVGERPGLGQSESLSCYAVYSPRMATTVEADRTCISNIH-QGGTPPVEAAAVIVDLAK
RMLEQKASGINMTR-----
>gi++|152971314|ref|YP_001336423.1| ethanolamine ammonia-lyase small subunit
[Klebsiella pneumoniae subsp. pneumoniae MGH 78578]
--MDQKQIEDIVRSVMASMGQ-----PQSQ
PQAPAASTPACHAACASEAVVESCALDLGSAEAKAWIGVQHPRAEVLTELKRSTAARVC
TGRAGPRPRQTALLRFLADHSRSKDTVLKEVPEAWVKAQGL-----LEV
RSEISDKNLYLTRPDMGRRLSPEAIDALKA-----QCVMDP-----DVQVVVS
DGLSTDAITVNYEEILPPLMAGLKQA---G-LKVGTPFFVRYGRVKIEDQIGELLGAKVV
ILLVGERPGLGQSESLSCYAVYSPRVATTVEADRTCISNIH-QGGTPPVEAAAVIVDLAK
RMLEQKASGINMSR-----
>gi++|218690575|ref|YP_002398787.1| ethanolamine ammonia-lyase, small subunit (light
chain) [Escherichia coli ED1a]
--MDQKQIEEIVRSVMASMGQ-----
TAPAPSEAKCTTTNCAAPVTSESCALDLGSAEAKAWIGVENPHRADVLTELRRSTVARVC
TGRAGPRPRQTALLRFLADHSRSKDTVLKEVPEEWVKAQGL-----LEV
RSEISDKNLYLTRPDMGRRLCAEAVEALKA-----QCVANP-----DVQVVIS
DGLSTDAITVNYEEILPPLMAGLKQA---G-LKVGTPFFVRYGRVKIEDQIGELLGAKVV
ILLVGERPGLGQSESLSCYAVYSPRMATTVEADRTCISNIH-QGGTPPVEAAAVIVDLAK
RMLEQKASGINMTR-----
>gi++|74312975|ref|YP_311394.1| ethanolamine ammonia-lyase small subunit [Shigella
sonnei Ss046]
--MDQKQIEEIVRSVMASMGQ-----
AAPAPSEAKCATTNCAAPVTSESCALDLGSAEAKAWIGVENPHRADVLTELRRSTVARVC
TGRTGPRPRQTALLRFLADHSRSKDTVLKEVPEEWVKAQGL-----LEV
RSEISDKNLYLTRPDMGRRLCAEAVEALKA-----QCVANP-----DVQVVIS
DGLSTDAITVNYEEILPPLMAGLKQA---G-LKVGTPFFVRYGRVKIEDQIGELLGAKVV
ILLVGERPGLGQSESLSCYAVYSPRMATTVEADRTCISNIH-QGGTPPVEAAAVIVDLAK
RMLEQKASGINMTR-----
>gi++|157158237|ref|YP_001463769.1| ethanolamine ammonia-lyase small subunit
[Escherichia coli E24377A]
--MDQKQIEEIVRSVMASMGQ-----
TAPAPSEAKCTTTTCAAPVTSESCALDLGSAEAKAWIGVENPHRADVLTELRRSTVARVC
```



SupplementalMultipleSequenceAlign.txt

```
TGRAGPRPRQTALLRFLADHSRSKDTVLKEVPEEWKAQGL-----LEV
RSEISDKNLYLTRPDMGRRLCAEAVEALKA-----QCVANP-----DVQVVIS
DGLSTDAITVNYEEILPPLMAGLKQA---G-LKVGTPFFVRYGRVKIEDQIGEILGAKVV
ILLVGERPGLGQSESLSCYAVYSPRMATTVEADRTCISNIH-QGGTPPVEAAAVIVDLAK
RMLEQKASGINMTR-----
>gi++|209919921|ref|YP_002294005.1| ethanolamine ammonia-lyase light chain
[Escherichia coli SE11]
--MDQKQIEEIVRSVMASMGQ-----
AAPAPSEAKCAATTTCAAPVTSESCALDLGSAEAKAWIGVENPHRADVLTELRRSTVARVC
TGRAGPRPRQTALLRFLADHSRSKDTVLKEVPEEWKAQGL-----LEV
RSEISDKNLYLTRPDMGRRLCAEAVEALKA-----QCVANP-----DVQVVIS
DGLSTDAITVNYEEILPPLMAGLKQA---G-LKVGTPFFVRYGRVKIEDQIGEILGAKVV
ILLVGERPGLGQSESLSCYAVYSPRMATTVEADRTCISNIH-QGGTPPVEAAAVIVDLAK
RMLEQKASGINMTR-----
>gi++|170683185|ref|YP_001744631.1| ethanolamine ammonia-lyase, light chain
[Escherichia coli SMS-3-5]
--MDQKQIEEIVRSVMASMGQ-----
AAPAPSEAKCATTCTTTPVTSESCALDLGSAEAKAWIGVENPHRADVLTELRRSTVARVC
TGRAGPRPRQTALLRFLADHSRSKDTVLKEVPEEWKAQGL-----LEV
RSEISDKNLYLTRPDMGRRLCAEAVEALKA-----QCVANP-----DVQVVIS
DGLSTDAITVNYEEILPPLMAGLKQA---G-LKVGTPFFVRYGRVKIEDQIGEILGAKVV
ILLVGERPGLGQSESLSCYAVYSPRIATTVEADRTCISNIH-QGGTPPVEAAAVIVDLAK
RMLEQKASGINMTR-----
>gi++|218548118|ref|YP_002381909.1| ethanolamine ammonia-lyase, small subunit (light
chain) [Escherichia fergusonii ATCC 35469]
--MDQKQIEEIVRSVMASMGQ-----
AAPAPSEAKCATTTCAPVTSESCALDLGSAEAKAWIGVENPHRADVLTELRRSTVARVC
TGRAGPRPRQTALLRFLADHSRSKDTVLKEVPEEWKAQGL-----LEV
RSEISDKNLYLTRPDMGRRLCAEAVEALKA-----QCVANP-----DVQVVIS
DGLSTDAITVNYEEILPPLMAGLKQA---G-LKVGTPFFVRYGRVKIEDQIGELLGAKVV
ILLVGERPGLGQSESLSCYAVYSPCMATTVEADRTCISNIH-QGGTPPVEAAAVIVDLAK
RMLEQKASGINMTR-----
>gi++|82777834|ref|YP_404183.1| ethanolamine ammonia-lyase small subunit [Shigella
dysenteriae Sd197]
--MDQKQIEEIVRSVMASMGQ-----
TAPAPSEAKCTTTTCAAPVTSESCALDLGSAEAKAWIGVENPHRADVLTELRRSTVARVC
TGRAGPRPRQTALLRFLADHSRSKDTVLKEVPEEWKAQGL-----LEV
RSEISDKNLYLTRPDMGRRLCAEAVEALKA-----QCVANP-----DVQVVIS
DGLSTDAITVNYEEILPPLMAGLKQA---G-LKVGTPFFVRYGRVKIEDQIGEILGAKVV
ILLVGERPGLGQSESLSCYAVYSPRMATTVEADRTCISNIH-QGGTPPVEAAAVIVDLAK
RMLEQKASGINMTR-----
>gi++|15802971|ref|NP_289001.1| ethanolamine ammonia-lyase small subunit
[Escherichia coli O157:H7 EDL933]
--MDQKQIEEIVRSVMASMGQ-----
TAPAPSEAKCATTTCAPVTSESCALDLGSAEAKVWIGVENPHRADVLTELRRSTVARVC
TGRAGPRPRTLALLRFLADHSRSKDTVLKEVPEEWKAQGL-----LEV
RSEISDKNLYLTRPDMGRRLCAEAVEALKA-----QCVANP-----DVQVVIS
DGLSTDAITVNYEEILPPLMAGLKQA---G-LKVGTPFFVRYGRVKIEDQIGEILGAKVV
ILLVGERPGLGQSESLSCYAVYSPRMATTVEADRTCISNIH-QGGTPPVEAAAVIVDLAK
RMLEQKASGINMTR-----
>gi++|15832565|ref|NP_311338.1| ethanolamine ammonia-lyase small subunit
[Escherichia coli O157:H7 str. sakai]
--MDQKQIEEIVRSVMASMGQ-----
TAPAPSEAKCATTTCAPVTSESCALDLGSAEAKVWIGVENPHRADVLTELRRSTVARVC
TGHAGPRPRTLALLRFLADHSRSKDTVLKEVPEEWKAQGL-----LEV
RSEISDKNLYLTRPDMGRRLCAEAVEALKA-----QCVANP-----DVQVVIS
DGLSTDAITVNYEEILPPLMAGLKQA---G-LKVGTPFFVRYGRVKIEDQIGEILGAKVV
ILLVGERPGLGQSESLSCYAVYSPRMATTVEADRTCISNIH-QGGTPPVEAAAVIVDLAK
RMLEQKASGINMTR-----
>gi++|206576189|ref|YP_002237214.1| ethanolamine ammonia-lyase, light chain
[Klebsiella pneumoniae 342]
--MDQKQIEDIVRSVMASMGQ-----PQTQP
EAPVATTPACHAACATDATVESCALDLGSAEAKAWIGVQSHRAEVLTELKRSTAARVC
```

SupplementalMultipleSequenceAlign.txt

TGRAGPRPRTLALLRFLADHSRSKDTVLEKVEAWVKAQGL-----LEV  
RSEISDKNRYLTRPDLGRRLSPEAIDALKA-----QCVMDP-----DVQVVVS  
DGLSTDAITANYEEILPPLMAGLKQA---G-LKVGTPFFVRYGRVKIEDQIGEILGAKVV  
ILLVGERPGLGQSESLSCYAVYSPRVATTVEADRTCISNIH-QGGTPPVEAAAVIVDLAK  
RMLEQKASGINMSR-----

>gi++|82544899|ref|YP\_408846.1| ethanolamine ammonia-lyase small subunit [Shigella boydii sb227]

-----MTSESCALDLGSAEKAWIGVENPHRADVLTERRSTVARVC  
TGRAGPRPRTQALLRFLADHSRSKDTVLEKVEEWVKAQGL-----LEV  
RSEISDKNRYLTRPDMGRRLCAEAVEALKA-----QCVANP-----DVQVVIS  
DGLSTDAITVNYEEILPPLMAGLKQA---G-LKVGTPFFVRYGRVKIEDQIGEILGAKVV  
ILLVGERPGLGQSESLSCYAVYSPRMATTVEADRTCISNIH-QGGTPPVEAAAVIVDLAK  
RMLEQKASGINMTR-----

>gi++|120554167|ref|YP\_958518.1| ethanolamine ammonia-lyase small subunit [Marinobacter aquaeolei VT8]

--MDEQTIQSIVNSVLRLEGE-----KDL PAGQVTRVQPEGKSTQRND  
PPAYKPSETAGRQQTESADTGDGLEDSLSEKFWHWNGIENAHNASVNSDMVKQTAARVC  
QGRAGPRPRTRSLLRFLADHSRSKDTVVEKVSPEWLEKKNL-----WEV  
QTCISDKSEYLRPDLGRKLSDDAKKTIGE-----RCKKSP-----QVQVVIS  
DGLSTDAVTNNLDEIIPPLMKGLESA---G-FTVGTPFFFLRYGRVKAQDEIGNLLQADAN  
LLLIGERPGLGQSESLSCYCVYKPTK-TVESDRMVISNIH-KGGTPPIEAAAVIVDLTR  
KMLEQKASGLNLKR-----

>gi++|18309881|ref|NP\_561815.1| ethanolamine ammonia-lyase small subunit [Clostridium perfringens str. 13]

--MNEKDLKLMVEQLVSMVG-----QV  
DMQSVKEKVVKEVSKNQSQVESDEFIPDITEIDIKKQLLVDPADREAYLEMKAQTPARLG  
SGRAGARYKTITALRMRADHAAAQDSVFSVSEEFIKKNNF-----IPV  
KTMCTDKDEYVTRPDLGRRFSPETTEIIE-----KCDKNP-----KVQIMVG  
DGLSSAAIEANVEDILPSIEQGLKMY---G-LNVGPILFVKYCRVPAMDVGEATGADV  
CLLVGERPGLVTAESMSAYIAYKPKVG-MPEAKRTVISNIH-KGGTTAVEAGAHIAELIK  
TMLDKKASGIDLK-----

>gi++|187733752|ref|YP\_001881238.1| ethanolamine ammonia-lyase, light chain [Shigella boydii CDC 3083-94]

-----MNYEEILPPLMAGLKQA---G-LKVGTPFFVRYGRVKIEDQIGEILGAKVV  
ILLVGERPGLGQSESLSCYAVYSPRMATTVEADRTCISNIH-QGGTPPVEAAAVIVDLAK  
RMLEQKASGINMTR-----

>gi++|89897707|ref|YP\_521194.1| ethanolamine ammonia-lyase small subunit [Desulfotobacterium hafniense Y51]

MHTAEKELERILQILDLLK-----EGSSFSA  
KNLPGEKETLISKGLKDTPAHELQEDMVTLMSEDEVLVSKPANLEAIKAMKATTPARIG  
IGRAGARMKTASLLKFLADHAVAQDAVFADVSPFLSRMNL-----FAV  
QSSARNKEEFLTHPELGRRLSEESLQIITQ-----KCEKNI-----QVQIIVV  
DGLSSAAIEANIPDLLPALTQGLAVS---G-IKTGDPFFVRYGRVWVEDQVASLVNADV  
VSLIGERPGLGTAESLSAYMIYRPDET-TVEADRTVISNIH-KGGIPPAEAGAHLADVIK  
QILKARASGVRLNRQIV-----VS-----

>gi++|150388099|ref|YP\_001318148.1| ethanolamine ammonia-lyase small subunit [Alkaliphilus metalliredigens QYMF]

-MISEQAVKEMVQQIVEQMTI-----GQKQ  
TTEDKYTQETDGKEQPEICIEDKNLKDLEIKMQDYFAVNPENKEVYVGLGKEQTPARVG  
IWRGSRNSTETLLRFRADHAVAMDVFTYVSEELLEEVGL-----FSV  
NTLCRNKDEYMRPDLGRKFQSQETIEMIKE-----KCVKSP-----QVQIYVS  
DGLSSTAIEANIKDILPSIMQGLENE---G-LKVGTPFFVKHGRVPAMDVISETL DAGAT  
VVLIGERPGLATGESMSCYMTYGGTVG-MPESRRTVISNIH-RGGTPATEAGAHIAQIVK  
EMINQKASGLDLKL-----

>gi++|19703432|ref|NP\_602994.1| ethanolamine ammonia-lyase small subunit [Fusobacterium nucleatum subsp. nucleatum ATCC 25586]

-MVSELELKEIIGKVLKEMAV-----  
EGKTEGQAVTETKKTSESHIEDGIIDDITKEDLREIVELKNATNKEEFLKYKRKTPARLG

SupplementalMultipleSequenceAlign.txt

```
ISRAGSRYTTHMLRLRADHAAAQDAVLSSVNEDFLKANNL-----FIV
KSRCEDKQYITRDLGRRLDEESVKTLE-----KCVQNP-----TVQVFVA
DGLSSTAIEANIEDCLPALLNGLKSY---G-ISVGTFFAKLARVGLADDVSEVLGA EVT
CVLIGERPGLATAESMSAYITYKGYVG-IPEAKRTVVSNIH-VKGTAAEAGAHIAHIIK
KVLDAKASGQDLKL-----
>gi++|158319838|ref|YP_001512345.1| ethanolamine ammonia-lyase small subunit
[Alkaliphilus oremlandii OhILAs]
--MDELNLKEMIKSILNEMVG-----EAPPAVIN
SNSTAERSVGTMTTKPQGVVEERFIPDITAVDIRKQFLVPNAADKEGYLKMKSYPARLG
LWRAGPRYMTEPSLRFADHAAAQDAVFSYVDEDLVKELGF-----VEV
VTECKDKDEYLTRPDLGRKFSNEAINTIKK-----VVKPNQ-----KVQVIVG
DGLSSAAIEANIKDVLPSLRQGLKMF---G-LDFGEVVFVKHCRVPAMDPIGEATGAEVV
CLLIGERPGLVTAESMSAYIAYKPTIG-MPEARRTVVSNIH-RQGTPAVEAGAYIAEIIK
RMLDNKASGLDLKEK-----
>gi++|125717384|ref|YP_001034517.1| ethanolamine ammonia-lyase small subunit
[Streptococcus sanguinis SK36]
--MDELQLKEMIRSLNEMGG-----DSAVKETAATDQN
KAEKPAVSLQEEVKQDTSVIEDGIIPDITEVDIQEQFLVPNAINEEAYRKIKKFTPARLG
LWRAGDRYKTSVLRFRADHAAAQDAVFSYVSDDFIKEMGF-----IPV
QTKATTKDEYLTRPDFGRVFPEDQQAIIKE-----KCKPNA-----KVQIVVG
DGLSSAAIEANVKDFLPALKQGLKMF---G-LDFGEVLFVKHARVAAMDQIAELTGAEVI
CMLVGERPGLVTAESMSAYLAYKPTVG-MPEAKRTVVSNIH-KGGTPAVEAGAYVAEIIK
KILDNKKSGIDLK-----
>gi++|16800209|ref|NP_470477.1| ethanolamine ammonia-lyase small subunit [Listeria
innocua Clp11262]
--MNEQELKQMIIEGILTEMSG-----
GKTTDTVAAAPTKSVVETVTEGSIPDITEVDIKKQLLVPEPADREGYLKMKQMTPARLG
LWRAGPRYKTETILRFRADHAVAQDSVFSYVSEDLVKEMNF-----IPV
NTKCHDKDEYLTRPDLGREFDDEMVEVIRA-----NTTKNA-----KLQIVVG
DGLSSAAIEANIKDILPSIKQGLKMY---N-LDFDNIIIFVKHCRVPSMDQIGEITGADV
CLLVGERPGLVTAESMSAYIAYKPTVG-MPEARRTVISNIH-SGGTPPVEAGAYIAELIH
NMLEKKCSGIDLK-----
>gi++|217964755|ref|YP_002350433.1| ethanolamine ammonia-lyase, light chain
[Listeria monocytogenes HCC23]
--MNEQELKQMIIEGILTEMSG-----
GKTTDTVAAAPTKSVVETVTEGSIPDITEVDIKKQLLVPEPADREGYLKMKQMTPARLG
LWRAGPRYKTETILRFRADHAVAQDSVFSYVSEDLVKEMNF-----IPV
NTKCQDKDEYLTRPDLGREFDNEMVEVIRA-----NTTKNA-----KLQIVVG
DGLSSAAIEANIKDILPSIKQGLKMY---N-LDFDNIIIFVKHCRVPSMDQIGEITGADV
CLLVGERPGLVTAESMSAYIAYKPTIG-MPEARRTVISNIH-SGGTPPVEAGAYIAELIH
NMLEKKCSGIDLK-----
>gi++|46907396|ref|YP_013785.1| ethanolamine ammonia-lyase small subunit [Listeria
monocytogenes str. 4b F2365]
--MNEQELKQMIIEGILTEMSG-----
GKTTDTVAAAPTKSVVETVTEGSIPDITEVDIKKQLLVPEPADREGYLKMKQMTPARLG
LWRAGPRYKTETILRFRADHAVAQDSVFSYVSEDLVKEMNF-----IPV
NTKCQDKDEYLTRPDLGREFDNEMVEVIRA-----NTTKNA-----KLQIVVG
DGLSSAAIEANIKDILPSIKQGLKMY---N-LDFDNIIIFVKHCRVPSMDQIGEITGADV
CLLVGERPGLVTAESMSAYIAYKPTIG-MPEARRTVISNIH-SGGTPPVEAGAYIAELIH
NMLEKKCSGIDLK-----
>gi++|16803216|ref|NP_464701.1| ethanolamine ammonia-lyase small subunit [Listeria
monocytogenes EGD-e]
--MNEQELKQMIIEGILTEMSG-----
GKTTDTVAAVPTKSVVETVTEGSIPDITEVDIKKQLLVPEPADREGYLKMKQMTPARLG
LWRAGPRYKTETILRFRADHAVAQDSVFSYVSEDLVKEMNF-----IPV
NTKCQDKDEYLTRPDLGREFDDEMVEVIRA-----NTTKNA-----KLQIVVG
DGLSSAAIEANIKDILPSIKQGLKMY---N-LDFDNIIIFVKHCRVPSMDKIGEITGADV
CLLVGERPGLVTAESMSAYIAYKPTVG-MPEARRTVISNIH-SGGTPPVEAGAYIAELIH
NMLEKKCSGIDLK-----
>gi++|116872550|ref|YP_849331.1| ethanolamine ammonia-lyase small subunit [Listeria
welshimeri serovar 6b str. SLCC5334]
--MNEQELKQMIIEGILTEMSG-----
GKTTETVEATPAKAITETVTEGSIPDITEVDIKKQLLVPEPADREGYLKMKQMTPARLG
```

SupplementalMultipleSequenceAlign.txt

```
LWRAGPRYKTETILRFRADHAVAQDSVFSYVSEDLVKEMNF-----TPV
NTKCQDKDEYLTRPDLGREFDDEMVEVIRA-----NTTKNA-----KLQIVVG
DGLSSAAIEANIKDILPSIKQGLKMY---N-LDFDNIIIFVKHCRVPSMDQIGEITGADV
CLLVGERPGLVTAESMSAYIAYKPTIG-MPEARRTVISNIH-SGGTPPVEAGAYIAELIH
NMLEKKCSGIDLK-----
>gi++|126699524|ref|YP_001088421.1| ethanolamine ammonia-lyase small subunit
[Clostridium difficile 630]
--MNEKDLKALVEQLVGMV-----
ELDTNVVSETVKKATEVVVDNACIDDITEVDIRKQLLVKNPKDAEAYLDMKAKTPARLG
IGRAGTRYKTETVLRFRADHAAAQDAVFSYVDEEFIKENNM-----FAV
ETLCKDKDEYLTRPDLGRKFSPETINNIKS-----KFGTNQ-----KVLILVG
DGLSSAAIEANLKDCVPAIKQGLKMY---G-IDSSEILFVKHCRVGAMDHLGEELGCEVI
CMLVGERPGLVTAESMSAYIAYKPYIG-MAEAKRTVISNIH-KGGTTAVEAGAHIAELIK
TMLDKKASGIDLK-----
>gi++|119718252|ref|YP_925217.1| ethanolamine ammonia-lyase light chain
[Nocardioides sp. JS614]
--MSTDELRISIVAEVLAELAEPGDAFARLTPATTAGPSGPTSTPAPEESDAPSSAATEP
AAVPASSATEITRPTLSGAPVSVIEVSDPTVPEARHRIGVENPANPSGLANLAASTAARIA
VGRAGPRPRTESVLLFGADHAVTQDAIFGDVPTALLDQFGL-----FAV
QTKVTTQDEFLLRPDLGRELDDAAKLVVAE-----KCVKGP-----QVQIVVG
DGLSSAAVTNNLPQIYPVLEAGLRDA---G-LTLGTPFFVRYCRVGVINDINDIVGADV
VLLIGERPGLGVADALSVSGRPTAG-KTDAHRDVICMITQNGGTPLEAGAFAVEHVK
NVMKHQASGVLELRLQES-----GTR-----
>gi++|160880777|ref|YP_001559745.1| ethanolamine ammonia-lyase small subunit
[Clostridium phytofermentans ISDg]
--MDEQSLRKMVEQMVEMV-----GG
TNVKSTTSSVGGQSATAISSECLPDITKIDIKSWFLLDHAKNKEEYLMKSKTPARLG
VGRAGARYKTMTMLRVRADHAAAQDAVFSVSEEFIKKNKF-----VFV
KTLCKDKDEYLTRPDLGRRFGKEELEVIKK-----TCGQSP-----KVLIIVG
DGLSSAAIEANVEDMIPAIKQGLSMF---Q-INVPPILFIKYARVGAMDDIGQATDADVI
CMLVGERPGLVTAESMSAYICYKAKHG-VPESKRTVISNIH-RGGTTPVEAGAHAAELIK
KMLDKKASGIELKG-----
>gi++|28211784|ref|NP_782728.1| ethanolamine ammonia-lyase small subunit
[Clostridium tetani E88]
-MFSEDLKRLVEEVLVEMTT-----
KEGANIKDTPVSQPTPTVVDEGIIIPDITEVDIRTNLLVDNPENAEYLMKMKHTPARIG
VGKAGTRYKTETILRFRADHAAAQDAVFTDVDEKILEEMNL-----ETI
QTMCSSKDEFITRDLGRKISKEELSKLS-----SYKKNA-----QVQIYVS
DGLSSKAVEANVKNILPALIQGLEGY---G-ISVGKPFVVKLGRVGAMDVISEEFGADV
CVLIGERPGLVTAESMSAYIAYKGTVG-MPESRRTVVSNIH-KGGTPAVEAGAYIADIK
LMLEKKASGLDLKL-----
>gi++|169827648|ref|YP_001697806.1| ethanolamine ammonia-lyase light chain
[Lysinibacillus sphaericus C3-41]
-MITQLVMEKMEKTTEGQASE-----VTTTTEPLIKFYDTTATSGATEIAEPMSTST
KSEPLIQLYQHGTTPQQAHIAPVAVEQPLNVAVPIKPFQFEADLTESIQAACKHTPARIG
VGRAGTRPKTKTWLKFRLDHAAAVDAVYGEVTEDLLQKLDV-----FQV
TTKVTDKEEYITRDLGRRLSDEAKSLIQ-----KCKQP-----KVQVIIS
NGLSASAI EENVQDVYLALQQLSNL---N-IDLGTFYIDKGRVALMDEIGELLQAEVI
VYLIGERPGLVSAESMSAYLCYKPRIG-TVEAERMVISNIH-KGGIPPEAGAYLGTIVQ
KILHYQASGVLEVAKEG-----
>gi++|29376186|ref|NP_815340.1| ethanolamine ammonia-lyase small subunit
[Enterococcus faecalis v583]
--MNEKELKEMIAGILTEMVA-----DNQAVST
ATVTAEEKPVTTHVTETTEIEEGLIPDITEVDLRKQLLLKNAVDPEALLKMKAFSPARLG
VGRAGTRYMSTLFRADHAAAQDAVFSVSEDLVKEMNF-----IST
KTICNSKDEYLTRPDYGRQFDEENSEIIRK-----NTTPKA-----KIQMVG
DGLSSAAIEANIKEVLPKIKQGLNMY---N-LDFDNVVFVKYCRVPAMDKIGEITDADV
CLLVGERPGLVTAESMSAYIAYKPTVG-MPEARRTVISNIH-KGGTPAVEAGAYIAEIIK
KMLDKKCSGIDLKEAE-----
>gi|37526861|ref|NP_930205.1| ethanolamine ammonia-lyase small subunit [Photorhabdus
luminescens subsp. taumondii TT01]
-----MNQKTIEK
NVSERVSNLKPASPEITNEIESCMPDLGSLQWIGVQNPRIEVLQELRRSTVARVG
```

SupplementalMultipleSequenceAlign.txt

TGRSGPRPRTOALLRFQADHSRSKDTVLKEVPTEWIEKQGL-----LEV  
QSQVSDKNLYLTRPDLGRKLSANAVETLLT-----QCKTAP-----DVQVVIS  
DGLSTDAITTYNEDLVPLLKGLEQA---G-MCIGTPFFVRYGRVKIEDQIGELLKAKVV  
VLLIGERPGLGQSESLSCYAVYQPTVEKTVEADRTCISNIH-RGGTPPIEAAAIIVDLAK  
NMLEQQASGIALSR-----  
>gi|15895974|ref|NP\_349323.1| ethanolamine ammonia-lyase small subunit [Clostridium  
acetobutylicum ATCC 824]

-----MENLLKIYDIKEEELSELKALTPARIC  
VGRAGTRLKTNFLKFRADHAVAMDAVWSSVDEKLIDTLNF-----LKV  
QTLAKDKEEYITRDLGRKFSEETLDYIKN-----NCINEP-----DVQIIAG  
DGLSATAINANLRKIYFVIVEKLKSR---G-YKVGTPIFVKYARVATMDKISEELNAKVT  
IILIGERPGLATGESMSSY MAYESSTK-KPESQRTVVSNIH-NKGIPSV D A G K E I V R I I D  
IMMKEKKS G V E L R I-----  
>gi|111224926|ref|YP\_715720.1| ethanolamine ammonia-lyase light chain (ethanolamine  
ammonia-lyase small subunit) [Frankia alni ACN14a]

-----MTPDSDPTAASPE-----  
-----RTSPDRGPAAVPVDLAALAERVRAVTPARVF  
VGRTGTSYRTANLLALRADHAAARDAVDAELDLAGPALAAT----T-ER-FGL----FVV  
QSAAADRAEYLRRPDLGRRLSDAGRAQVAA-----RCPPGA-----DLQIVIG  
DGLSAAAVDAQVPALLPALLTAAAEA---G-WSTGQPFVAVRQCRVGMNDIGDLLHPTVI  
VLLIGERPGLATAESLSAYLAHRPRSG-HTDADRNLLSNIH-RRGVTPTQAVDRITGLAQ  
TVRAAGTSGVSIKEPPT-----APQIHT-----  
>gi|146341485|ref|YP\_001206533.1| ethanolamine ammonia-lyase light chain  
(ethanolamine ammonia-lyase small subunit) [Bradyrhizobium sp. ORS278]

-----MMNGVENKAPATSSADDWTWLSRYTEARIA  
LGRCGPGVPTSAHLGFQAAHAEARDAVLKPFDAEQLAADAT----A-RG-WPA----LAV  
HSRAADRATYLRPDEGRLLSPASEALLS-----EPRAPA-----DIVLVVA  
DGLSSRAVQVNALPVLDTLMPLLAAT---G-RRLSPIIIASQGRVALADHV G E L F G A S A S  
IILIGERPGLSAADSLGLYL T W M P R R G - R V D S E R N C I S N V R - H G G L A P D D A A K Q S A E L I A  
RMFQHQAAAGVSLARLPQ-----LPALEDGSS-----  
>gi|86748842|ref|YP\_485338.1| ethanolamine ammonia-lyase small subunit  
[Rhodopseudomonas palustris HaA2]

-----MTSSPTAPPALS D L R R L T P A R V A  
LGRAGVSLTTDALLDFTLAHARARDAVHAAFDAAAVAAELG----A-LG-LTP----LQV  
SSRAQSRRDYLRPDLGRQLDPASRAMLE-----AHPSTA-----DLALVIG  
DGLSPVAVAAQAGEVVRLLPRLAAS---G-IGVGPAAVVTGARVALGDEIGALLGARIV  
LVLIGERPGLSAPASLGAYVTLGPRPG-RTDADRNCVSNIIH-AAGISPDEAAFKIAWLVR  
ESMARGASGVALKDESG-----EGGSTPA-----ELPGPG-----  
>gi|115523824|ref|YP\_780735.1| ethanolamine ammonia-lyase small subunit  
[Rhodopseudomonas palustris BisA53]

-----MTKPTPTIHSRLRDLRRLTPARVG  
LGRSGASVPTKALLDFTLDHARARDAVHASFDAAL TG E L S-----ALGLAV----HEV  
RSRVRGRHDYLRPDLGRQLDPESRDRLAG-----IGGPGG-----DLVLVIG  
DGLSPGAVHARAAAVVGRLLKRLTEA---G-IAVGPAVVANGARVALGDEIGALLGARMV  
AVLIGERPGLSSPASLGAYLTYAPRPG-LTDAERNVSNIIH-PAGLSEDEAAFKIGWLIR  
EALARRLSGVALKDDSM-----LEAATAAR-----ELSAPG-----  
>gi|148255137|ref|YP\_001239722.1| ethanolamine ammonia-lyase light chain  
[Bradyrhizobium sp. BTAi1]

-----MSETDDQAPATSSSDDWSWLSRYTAARIA  
LGRCGPGLPTSAHLGFQAAHAEARDAVLKPFDAAGCAADVT----A-RG-WPA----IVV  
RSRAADRATYLRPDAGRLLAPDSEALLS-----EPRAPA-----DIALVVA  
DGLSSRAVQVNALPVLDTLMPLLAAT---G-RRLSPIIVAAQGRVALADHV G E L F D A S A S  
IILIGERPGLSAADSLGLYL T W M P R R G - R V D S E R N C I S N V R - H G G L A P E D A A K Q A A E L I A  
RMFKHRAAGVSLARLPQ-----LPAPDGS-----  
>gi|90423221|ref|YP\_531591.1| ethanolamine ammonia-lyase small subunit  
[Rhodopseudomonas palustris BisB18]

SupplementalMultipleSequenceAlign.txt

LGRTGASLPTQALLDFTLDHARARDAVHSTFDSARLAAELA-----A-LG-LAS-----CEV  
SSRARGRRDYLVPRDLGRQLDPASHDALARR-----GVGAPC-----DLALMVG  
DGLSPTAVNARAVDVVRGLLRLAAA---D-LTIGVAAVATGARVALGDEIGVLLGARMV  
LVLIGERPGLSAPASMGAYLTFAPRPG-ITDAERNVCVSNIIH-AAGISNDEAAYKIGWLLR  
ESFARQISGVALKDDSA-----LQARDLAP-----RRVEQT-----  
>gi|39936808|ref|NP\_949084.1| ethanolamine ammonia-lyase small subunit  
[Rhodospseudomonas palustris CGA009]  
-----  
MNSPATPPRSLAELRRLTPARVA  
LGRAGASLPTAEALLDFTLAHARARDAVHAGFDATAIAAELQ-----A-LG-LPT-----LPV  
SSRAADRRDYLRPDLGRQLDPASRAVL D-----GAGKAV-----DVALVIG  
DGLSPVAVAAQATAVVRHLLPRLAAV---R-IGVGAAVVATGARVALGDEIGAALGARMV  
VVLIGERPGLSAPASLGAYLTFGPRPG-LTDADRNCVSNIIH-ASGISADEAAHKIAWLVG  
EGLVRKATGVTLKDESG-----SLMPELPKS-----  
>gi|170749714|ref|YP\_001755974.1| ethanolamine ammonia-lyase [Methylobacterium  
radiotolerans JCM 2831]  
-----  
MSDPAEPARPGPPTLRDLRGLTQARIA  
LGAHGAGLPTGAALAFGLDHARAREAVWTPLDAAAIREALR-----V-EG-LDS-----VEV  
RSAVADRTEYLRRPDKGRSLDPGAASALDG-----HG-PGF-----DVAVVIA  
DGLSATAVALNAVPAALAAARVRRRA---G-WSLAPVVVALQGRVAIGDPGARLGARCV  
VVLIGERPGLSASDSLGCYVTFGPEPG-LPDARRNCISNIR-EGGLAVEAAAGQMEALLR  
AMLAQGTSGVALRRGDP-----ADPPALPDARD-----  
>gi|71733540|ref|YP\_276773.1| ethanolamine ammonia-lyase small subunit [Pseudomonas  
syringae pv. phaseolicola 1448A]  
-----  
MNEIQDNAAPANPWLELRRLTSARIA  
LGRTGTSLPTSQALDFQAAHAQARDAVHLAFDHAASIAQLT-----EKGRET-----ILL  
HSAAADRDSYLQRPDLGRRLNEESAQALREYAA---AHPGGL-----DLAVVVA  
DGLSALAVHRHAVPFLTRLEEQANVE---G-WSLSPVIMVEQGRVAVAVEV GELLGAKMV  
VILIGERPGLSSPDSLGLYFTYAPKVG-LNDAHRNCISNVR-LEGLSYGMAAHRLLYLMLR  
EACRRQISGVNLKDEAQ-----LQTLDSGSAEHSKGPIGNFLLDGPAAPH---  
>gi|222080798|ref|YP\_002542526.1| Ethanolamine ammonia-lyase [Agrobacterium  
radiobacter K84]  
-----  
MANSVINARAIGIADLKDMTDARVA  
LGRFGAGAPTKAAQAFLLDHARAREAVWSSVDQEGLQRQLL-----DLQLDA-----VVV  
ESLAGDRSQYVRRPDLGRKLSATSLAQLDAIR-----HGDDGF-----DVVVIIVA  
DGLSASAVDINAAAVV GALADRLRRH---G-FSLAPVVIASQARVALSDPIGEALAAKTA  
IMLIGERPGLSAAADSLGAYVTYSPRSD-TPDSRRNCVSNIR-EGGLPIAAAADQIIELVI  
AMRMTGISGVGLKDAVA-----KLEVTA-----  
>gi|21243100|ref|NP\_642682.1| ethanolamine ammonia-lyase small subunit [Xanthomonas  
axonopodis pv. citri str. 306]  
-----  
MSVPSTPPRDAWAQLRQLTPARIA  
LGRVGTSLPTDAHLEFQLAHAQARDAVHLAFDPAPLQAALE-----QRGRSN-----ILL  
QSAAADRHHQYLQRPDLGRRLAEEAAAQLRGLTA---VHGGRH-----DVAVVVA  
DGLSALAVHRHAARMLDQIDALASQE---G-WSLAPVVVLRQGRVAIGDEVGELLDARTV  
IVLIGERPGLSSPDSLGLYLYTYTPRVG-LTDAARNCISNIR-AEGLSYAEATHKLGYLRLR  
EAFRRKLSGVQLKDEAE-----QPALLSGPADVAPRTFLLPD-----  
>gi|217978557|ref|YP\_002362704.1| Ethanolamine ammonia-lyase [Methylocella  
silvestris BL2]  
-----  
MNDLVVVPWEGLRRLTQARIA  
LGRAGVSIPTKPLLDFFQFAHARARDAVHLPM DREGLC ARME-----AAQFPV-----IEL  
HSAAPDRTTYLQRPDLGRKLGADSREKLAALAA---KGAGHF-----DIAFVVA  
DGLSAFAVNEHALSMLAIRPKL TEA---G-WRMAPVALVEQGRVAIGDEIGAIFGAEIV  
VILIGERPGLSAPDSLGLYMTYAPRVG-LTDEARNCISNVR-PEGQSFGAAHRLDYLLK  
EAKRRKLSGVLDKDESE-----MKVLPTEGKQDQTNFLISEGAVPPV-----  
>gi|66043894|ref|YP\_233735.1| ethanolamine ammonia-lyase small subunit [Pseudomonas  
syringae pv. syringae B728a]  
-----  
MNELQDSAAPANPWLELRRLTPARIA

SupplementalMultipleSequenceAlign.txt

LGRTGTSLPTSAQLDFQAAHAQARDAVHLAFDHAASQAQLT-----EKGRET----LLL  
HSAAADRDSYLQRPDLGRRLNDESAQTLRDYAA----AHPGGL-----DLAIVVA  
DGLSALAVHRHAVPFLIRLEEQASAE---G-WLSLSPVIMVEQGRVAVADEVGEVLLGAKMV  
VILIGERPGLSSPDSLGLYFTYAPKVG-LNDAHRNCISNVR-LEGLSYGMAAHRLLYLMR  
EACRRQISGVNLKDEAE-----LQTLSDGAGDHSDKPIGNFLLDGPAAAPH---  
>gi|28867954|ref|NP\_790573.1| ethanolamine ammonia-lyase small subunit [Pseudomonas  
syringae pv. tomato str. DC3000]

-----MSDQPMNEVQDNAAPANPWLELRRLTPARIA  
LGRTGTSLPTCAQLDFQAAHAQARDAVHLAFDHAASQAQLA-----EKGRET----ILL  
HSAAADRDSYLQRPDLGRRLNDESAQTLRDYAA----AHPGGL-----DLAVVVA  
DGLSALAVHRHAVPFLTRLEEQASAE---G-WTSLSPVLMVEQGRVAVADEIGELLGAKMV  
VILIGERPGLSSPDSLGLYFTYAPKVG-LNDAHRNCISNVR-LEGLSYAMAAHRLLYLMR  
EACKRQISGVSLKDEAQ-----LNTLESDDSAENSDRKIGNFLLDGPVAVPH---  
>gi|21231699|ref|NP\_637616.1| ethanolamine ammonia-lyase small subunit [Xanthomonas  
campestris pv. campestris str. ATCC 33913]

-----MSTPTTTPRDAWARLRALTPARIA  
LGRAGTSLPTASHLEFQLAHAQARDAVHLAFDPAPLQAVLQ-----QRGRRS----VLL  
HSAASDRHLYLQRPDLGRRLSDEAAEQLRGTTA---VHGGGA-----DLAVVVA  
DGLSALAVHRHAGAMLEIDALAAHE---G-WSLAPVTLIAQGRVAIGDEVGELLQARAV  
IVLIGERPGLSSPDSLGLYLYTYAPRVG-HTDAARNCSNIR-GEGLSYAEAGHKLGYLLR  
EAFRRKLSGVQLKDEAD-----RPLLGTDTASQAAPRNFLLE-----  
>gi|66768175|ref|YP\_242937.1| ethanolamine ammonia-lyase small subunit [Xanthomonas  
campestris pv. campestris str. 8004]

-----MSTPTTTPRDAWARLRALTPARIA  
LGRAGTSLPTASHLEFQLAHAQARDAVHLAFDPAPLQAVLQ-----QRGRRS----VLL  
HSAASDRHLYLQRPDLGRRLSDEAAEQLRGTTA---VHGGGA-----DLAVVVA  
DGLSALAVHRHAGAMLEIDALAAHE---G-WSLAPVTLIAQGRVAIGDEVGELLQAQAV  
IVLIGERPGLSSPDSLGLYLYTYAPRVG-HTDAARNCSNIR-GEGLSYAEAGHKLGYLLR  
EAFRRKLSGVQLKDEAD-----RPLLGTDTASQAAP---RNFLLE-----  
>gi|27378107|ref|NP\_769636.1| ethanolamine ammonia-lyase small subunit  
[Bradyrhizobium japonicum USDA 110]

-----MSDPAVPRRPTLDLRSFTPARVA  
LGRSGASVPTRALLDFTLDHARARDAVHAVFDVPRLLADLG-----ALGLAV----TEA  
RSRAADRRDYLRPDLGRQLDAGSIEALAR-----IASRPC-----QLAIVIG  
DGLSAAAVHAAHVALVTRLLPLLAAD---DAVALGHVVVASGARVALGDQIGAILGARMV  
VTLIGERPGLSAPDSLGLYLYTYAPRVG-RTDAERNCSNIR-HAGLSNDEAAFKIAWLLR  
EGLAREVTGVALKDESA-----DRAPRRIGTSLPE-----  
>gi|17547845|ref|NP\_521247.1| ethanolamine ammonia-lyase small subunit [Ralstonia  
solanacearum GMI1000]

-----MTDERDDTPATVTQNPWQALRRLTPARIA  
LGRAGVSLPTRPQLAFQAAHAQARDAVHLFPDPAALQAQLH-----AQGHAT----LLL  
HSAARDRDQYLQRPDLGRQLDAPSAQLLDGHAH----AHPGGV-----DIALVVA  
DGLSALAVHRHAAPLIAGVAEGRVRAQ---G-WSMAPIALVEQGRVAVADEVGERLGARMV  
VILIGERPGLSSPDSLGLYFTYAPRVG-LTDAARNCSNVR-PEGLGYAAAAHKLLYLMR  
EAWRRQSGSVLLKEAAE-----VPLLEAGRRNFLLD-----  
>gi|167647492|ref|YP\_001685155.1| ethanolamine ammonia-lyase [Caulobacter sp. K31]

-----MSGPILPKGVTPDPWTALRRHTPARIA  
LGRTGSSLPTSEVLGFALAHAQARDAVHAPFEAQATAAAIQ----A-LG-LET----LIV  
DSAAPDRASYLRPDLGRRLSQAAGRAALS-----PGRGSH-----DLAIVIA  
DGLSSTAVHAAAPLVEALLPAVREA---G-WSLAPVVIARQARVALGDAVGEVLLGARLV  
ILLVGERPGLSSPDSLGLYITFGPRVG-RTDAERNCSNIR-AEGLGYGAAAFKLAWHAR  
EALRLGLTGVALKDESD-----TALLDVTTTPR-----IAPAGRSRPTG----  
>gi|183221859|ref|YP\_001839855.1| ethanolamine ammonia-lyase, light chain  
(ethanolamine ammonia-lyase small subunit) [Leptospira biflexa serovar Patoc strain  
'Patoc 1 (Paris)']

SupplementalMultipleSequenceAlign.txt

LNRVGGSIATKEMLKFRDLHANAKDAVNQEPNWELIQKQSN-----ELCQIYGI--QNIFI  
KSQVSSKQEYLLRPDLGRRRISEESKLSLF-----PYNLGY-----DLSIVCI  
DGLSAKAIDNLSIFLELFFAKIQNT---N-LSIAPLVLRSRGRVALGDEIAEILKAKIC  
IVIIIGERPGLSAADSLGIYLYTYPKLG-FTDESRNCISNVR-PLGLPFSLAVEKTIYLIK  
ECLLQKKSGVLLKQMP-----GEIKPLNEKKIIP-----IQPTVD-----  
>gi|170719780|ref|YP\_001747468.1| ethanolamine ammonia-lyase small subunit  
[Pseudomonas putida w619]

-----MDRQIPTPENPWLALRNLTARIA  
LGRSGISLPTSAQLDFQFAHAQARDAVHLAFDHTALSEQLK-----ERGRDS-----LVL  
HSAASDRNQYLQRPDLGRRLNERSVEQLRQHAK----TNPGGC-----DLAIVVA  
DGLSALAVHRHTLPFLARFEEQAAAD---G-WTSAPVVLVEQGRVAVAVEVQQLLGARMT  
VMLIGERPGLSSPDSLGLYFTYAPKVG-LTDAYRNCISNVR-LEGLSYGMAAHRLLYLMR  
EACRRQLSGVNLKDEAE-----VHTIDSENTSNQK----GNFLLGEG-----  
>gi|34496639|ref|NP\_900854.1| ethanolamine ammonia-lyase small subunit  
[Chromobacterium violaceum ATCC 12472]

-----MKEKQNPVTEGWDGELSRLTAARIA  
LGRAGSSLPCRETLRFALAHAQARDAVHTPLDAAALAGELA-----ANGHRV----IDI  
RSAASSRAEYLRQPDGRRLLDDASRARLLA-----ETDKGC-----DLLILIA  
DGLSSRAPAQHAVPLLELLPRVREM---G-LRVGPLLIAAREARVALGDEAGEIMGARMT  
AMLIGERPGLSSPDSLGLYLTAAAPRAG-RSDAERNCSNVR-PDGLPYPLAAFKLAWLID  
AAL-RQPTGVALKDGSA-----ADPRWAALAAARQASLVRN-----  
>gi|77461213|ref|YP\_350720.1| ethanolamine ammonia-lyase small subunit [Pseudomonas  
fluorescens Pf0-1]

-----MEKPPVDPQNPWLELRRLTPARIA  
LGRTGTSLPTRAQDFQYAHQAQARDAVHLPFDAALSAQLN-----ERQRES-----LLL  
HSAAVDRNSYLQRPDLGRKLSAQSAQTLREYQAQ---AHPGGV-----DLVIVVA  
DGLSALAVHRHTLPFLTRLEEQMSAD---E-WSTAPVVLVEQGRVAIGDEIGQLLGAKMV  
VMLIGERPGLSSPDSLGLYFTYNPKVG-LTDAYRNCISNVR-LEGLSYGMAAHRLLYLMR  
EACRRQLSGVNLKDEAQ-----VQTLSEAGTDMKSNFLDPPPA-----  
>gi|26987280|ref|NP\_742705.1| ethanolamine ammonia-lyase small subunit [Pseudomonas  
putida KT2440]

-----MDHRTPTDNPWLALRNLTARIA  
LGRTGTSLPTGAQLDFQFAHAQARDAVHLAFDHAGLASQLS-----DRGRES-----LVL  
HSAASDRHQYLQRPDLGRRLNEDSIATLRQHAQ---ANPGGV-----DLAIVVA  
DGLSALAVHRHTLPFLTRFDEQAAAD---G-WTCAPVVLVQQGRVAVAVEVGEGLLGARMT  
VMLIGERPGLSSPDSLGLYFTYAPKVG-LTDAYRNCISNIR-LEGLSYGMAAHRLLYLMR  
EACRRQLSGVNLKDEAE-----VHSLNEDSANQK----GNFLLGKG-----  
>gi|148545831|ref|YP\_001265933.1| ethanolamine ammonia-lyase small subunit  
[Pseudomonas putida F1]

-----MDHRTPTDNPWLALRNLTARIA  
LGRTGTSLPTGAQLDFQFAHAQARDAVHLAFDHAGLASQLS-----DRGRES-----LVL  
HSAASDRHQYLQRPDLGRRLNEDSITTLRQHAQ---ANPGGV-----DLAIVVA  
DGLSALAVHRHTLPFLTRFDEQAAAD---G-WTSAPVVLVQQGRVAVAVEVGEGLLGARMT  
VMLIGERPGLSSPDSLGLYFTYAPKVG-LTDAYRNCISNIR-LEGLSYGMAAHRLLYLMR  
EACRRQLSGVNLKDEAE-----VHSLNEDSASQK----GNFLLGKE-----  
>gi|167031603|ref|YP\_001666834.1| ethanolamine ammonia-lyase small subunit  
[Pseudomonas putida GB-1]

-----MDHRTPTDNPWLALRNLTARIA  
LGRTGTSLPTGAQLDFQFAHAQARDAVHLAFDHAGLASQLS-----DRGRDS-----LVL  
HSAASDRHQYLQRPDLGRRLNEDSIATLRQHTQ---ANPGGV-----DLAIVVA  
DGLSALAVHRHTLPFLNRFEEQAAAD---G-WTSAPVVLVQQGRVAVAVEVGEGLLGARMT  
VMLIGERPGLSSPDSLGLYFTYAPKVG-LTDAYRNCISNIR-LEGLSYGMAAHRLLYLMR  
EACRRQLSGVNLKDEAE-----VHSLESEGSASQK----GNFLLGKG-----  
>gi|186474780|ref|YP\_001856250.1| ethanolamine ammonia-lyase [Burkholderia phymatum  
STM815]



SupplementalMultipleSequenceAlign.txt

LGRAGNSLPTAPLLAFNLSHAQARDAVHHPLDQVLDLHEQLR-----TLGFST----LDV  
HSAAPDRAHYLRRPDMGRRLSDESREALTHA-----AASEAP-----DVVFVIA  
DGLSAFAASKQSVPLQAVTKRLA-----G-WKIGPVVVARQSRVALGDEIGELLRSKLV  
VMLIGERPGLSSPDSLGVYLYTYAPKVG-CSDAQNCISNVR-PEGLDYEAHAHKLHYLLT  
HARRLGLTGVLKDDSD-----ALLQAPETKP----TIADDSKTR-----  
>gi|187922056|ref|YP\_001893698.1| ethanolamine ammonia-lyase small subunit  
[Burkholderia phytofirmans PsJN]

-----MSDFLEKNPWNALRQFTNARIA  
LGRAGNSLPTAPLLAFNLSHAQARDAVHHPLDTEVLHEQLR-----AQNFKT----LDV  
HSAAPDREHYLRRPDLGRRLSEESRVTLAA-----VPNDSP-----EVVFVIG  
DGLSAFAASKQSIPLQAVVPRAD-----WKIGPVVVARQARVALGDEIGELLNAKLV  
VMLIGERPGLSSPDSLGIYLYTYAPKVG-CSDAQNCISNVR-PEGLDYPLAAHKLHYLLT  
HARRLGLTGVLKDDSD-----ALLAETPAAP----AVSDDSNSSAP-----  
>gi|124267604|ref|YP\_001021608.1| ethanolamine ammonia-lyase light chain  
[Methylbium petroleiphilum PM1]

-----MSGGPVIANPWSVLRHTPARIG  
LGRSGISQPTAPQLDFQLAHAQARDAVHRPLDHEAVDAAVR-----A-LG-LPT----LAL  
HSAAADRHIYLRPDLGRRLDEASLARLAAC-----TANEQA-----DLALVVA  
DGLSALAIERHAAPFIAELRRVLARD-----WRWAPVAIVRQARVAIGDPIGEALGARLA  
VVLVGERPGLSSPDSMGVYVWSPRAG-RVDAERNICISNVR-PEGLPLPQAAARLAWLLG  
EARSRQLTGVALKDDSG-----PALETGGDSG----SFLAPP-----  
>gi|182677068|ref|YP\_001831214.1| ethanolamine ammonia-lyase [Beijerinckia indica  
subsp. indica ATCC 9039]

-----MSDPYADPWFLREKTPARIA  
LGRCGDGLPTARLLEFQRDHARARDAVHAALDSEKLCSELD----P----LKP----IIV  
QSQARDRALYLQRPDLGRRLDEASREKLR-----GFY-----DISLVLA  
DGLSALAVQSQAARLALIEKRLP-----LRFAPPVIALQARVALGDEIASALGARLV  
IVLIGERPGLSAADSLGAYITFAPVPGKTTDAQNCISNIR-PGGLSLEEAARRIGAIAS  
YALHLQGTGTMLKEDAA-----LNALAPPEAMKER-----  
>gi|104779888|ref|YP\_606386.1| ethanolamine ammonia-lyase small subunit [Pseudomonas  
entomophila L48]

-----MDRHTPTDPNPWLALRNLTARIA  
LGRTGISLPTGAQLDFQYAHAQARDAVHL PFDHAGLRQQLS-----DRGRDS----LLL  
HSAASDRHQYLQRPDLGRRLHEDSAQRLREHAQ----ANPGGV-----DLAIVVA  
DGLSALAVHRHTLPFLSRFEEQAAAE---G-WTSAPVVLVEQGRVAVAVEVGEVLLGARM  
TMLIGERPGLSSPDSLGLYFTYAPKVG-LTDAYRNCISNVR-LEGLSYGMAAHRLLYLMR  
EACRRQLSGVNLKDEAE-----VHSIDSNTGTGS----GNFLLGEG-----  
>gi|114328556|ref|YP\_745713.1| ethanolamine ammonia-lyase light chain [Granulibacter  
bethesdensis CGDNIH1]

-----MVEKSAGNPPDHTTTPTIDPWAKLRAATSARIG  
LGRAGDAMRTRDVLDFQLAHACARDAVHTPLDQVLDLHEQLR-----P----RET----ILV  
QADVDSRGTYLRRPDLGRRLSPDCTNVLQK-----GDW-----DVVFVIA  
DGLSSTAVQVHAAPFLQVITLLP-----G-WRIAPVVIATQARVALGDDIGERIGAKLC  
ALLVGERPGLTAADSLGVYLYTYDPKRG-RRDSERNICISNIH-GGGLSYATAADKLTWLM  
EARSRKLTVALKDDPL-----LPGAAPTPLSADPPG-----  
>gi|121605521|ref|YP\_982850.1| ethanolamine ammonia-lyase small subunit [Polaromonas  
naphthalenivorans CJ2]

-----MNTKVSPVTANPWETLRQFTDARIA  
LGRAGVSLPTAAHLAFQLAHAQARDAVHLVLDVPLSLSLN-----AVSGKQTC----LSL  
HSAAADRTVYLRPDLGRRLDDASRETLEGLKPAPEPSVRLY-----DLAFVVV  
DGLSALAI EQNAAPFLSVLQRRIAAE---N-WSVAPLCIVSQGRVAIGDEVGELLGAKAV  
VVLIGERPGLSSPDSMGLYLTWMPRVG-LLDDSRNCISNVR-PAGLRYEEAAYKLHYLLS  
QARQRQLTGVDLKDEALADPERLRVSEKNFLLDHSRTP----GASGSQA-----  
>gi|157371672|ref|YP\_001479661.1| ethanolamine ammonia-lyase [Serratia  
proteamaculans 568]

SupplementalMultipleSequenceAlign.txt

LGRTGSSLPTEELLKFLGLAHAQARDAVHQPFDSDTLGGALQ-----DQGWPT----LTV  
HSQAADRTAYLSRPDLGRRLLAADSRSLLLD-----LPDKPV-----DLLLVA  
DGLSSKAVHRQALPLLQALRPYLELL---G-LSVAPVVLAHQSRVALGDDIGECLGARAV  
AMLIGERPGLSSPDSLGIYLTWGPNTQ--RRESERNICISNVR--PEGLNYPQAAFKLAWLLE  
QAFQRRLTGIDLKDESD-----NPALYGRVSP----LHSQLGG-----  
>gi|158425189|ref|YP\_001526481.1| ethanolamine ammonia-lyase small subunit  
[Azorhizobium caulinodans ORS 571]  
-----  
-----MSTKRDPWLGLARHTPARIA  
LGRTGASLPTAEVLKFAHALAHAQARDAVHTPFDAATAEGVR----A-LG-FET----LDV  
TSAAPARDIYLRRPDLGRRLSDESRTLAA-----RTDAPI-----DLALVVA  
DGLSSAAVHAQAVPFLAALKPWIASE---G-WRTGPVVVAREARVALGDEVGQLLKARAV  
AVLIGERPGLSSPDSLGLYLTLNPQVG--CNDAQRNCISNVR--AEGLSHEAAAFKLAWLLK  
EAFRRSLTGVDLKDESD-----DFLVDGRPPL-----RLA-----  
>gi|159898780|ref|YP\_001545027.1| ethanolamine ammonia-lyase [Herpetosiphon  
aurantiacus ATCC 23779]  
-----  
-----MAEQSENELWQRLRQFTNARIG  
IGRVGDALPTKANLAFQDHALARDAVHAQVDFAAIASALQ-----PEFPQI----LRL  
KSAALDRATYLRPDLGRSLHVESRLQLEA-----LQTDPC-----IVALVVA  
DGLSAVAIERHAVPLLNIIKPKLES---G-WSLAPLVLVEQGRVAIGDEIGELLKAELV  
VILIGERPGLSVADSLGIYLTYPQRG--RNDARNICISNIH--PQGLSYVAASDLLMYLLG  
QARQRRLTGVALKDERQ-----QLGATNNPTLE-----  
>gi|91781404|ref|YP\_556610.1| ethanolamine ammonia-lyase small subunit [Burkholderia  
xenovorans LB400]  
-----  
-----MSEFLEKNPWNALRQFTNARIA  
LGRAGNSLPTAPLLAFNL SHAQARDAVHHPLD TDVLHEQLR-----TQHFTT----LDV  
HSAAPDREHYLRRPDLGRRLSEESRVALAA-----VPDGSP-----EVFVIG  
DGLSAFAASKQSLPLLRAVIPRLAD-----WKIGPVVVARQARVALGDEIGELLNARLV  
VMLIGERPGLSSPDSLGIYLTYPKVG--CSDAQRNCISNVR--PEGLDYPLAAHKLHYLLT  
HARRLGLTGVLKDDSD-----ALLADTPAAP-----AISGESNPGAA-----  
>gi|89899398|ref|YP\_521869.1| ethanolamine ammonia-lyase small subunit [Rhodoferrax  
ferrireducens T118]  
-----  
-----MDDPTSPVIANPWAALRQFTDARIA  
LGRAGVSLPTAAHLDFQLAHAKARDAVHLALDAPQLAQLSN-----AARGDQQAPCLLL  
HSAADRPTYLQRPDLGRRLDAASSAVALDLEPAQA--PSRPY-----DLAFVVV  
DGLSALAEQNAAPFLRILQARIAPE---H-WSVAPICIVKQGRVAIGDEVAERLGAQAV  
VVLIGERPGLSAADSMGLYLTWMPRVG--LLDASRNCISNVR--PAGLGFDEAAAYKLHYLLS  
QARQRQLSGVELKDETTGGGPDRTANQTNFLLDHAHTP----NEAAPPS-----  
>gi|188591932|ref|YP\_001796530.1| ethanolamine ammonia-lyase, light chain  
[Cupriavidus taiwanensis]  
-----  
-----MTAKRQAPVVRPDPAAEADPWQRLRRFRTRARIA  
LGRTGHSQPTDAVLAFLGLAHAQARDAVHLALDVAVATALD-----AAGLPH----VAV  
HSAAPDREHYLRRPDLGRRLDQASRARLDAT-----RPQQAP-----DVVFVIA  
DGLSALATQCHALPLLQAARQLPQD-----WQLGPVVVAEQSRVALGDEIGERL GARQV  
VMLIGERPGLSSPDSLGIYLT HAPRVG--RTDAERNICISNVR--PEGLSYAQAADRLVFLLR  
GAAALGRSGVDLKDDSA-----PALPTGSAGP-----RPELR-----  
>gi|83719369|ref|YP\_443773.1| ethanolamine ammonia-lyase small subunit [Burkholderia  
thailandensis E264]  
-----  
-----MSDAVEKNPWGQLKSFTNARIA  
LGRAGNSLPTAPLLAFNL SHAQARDAVHQPLDADALRRDIE-----AAGLPT----LGV  
QSAAPDRQHLYLRRPDLGRRLSDDSRALLAAYGA---GLDEAP-----DVVFVVG  
DGLSAFAAAKQALPLLNAMRAKLD-----G-WRVGPVVVVARQARVALGDEIGELLGARLV  
AMLIGERPGLSSPDSLGVYLTYPKVG--CHDAQRNCISNVR--PEGLPHDAAAHLHYLLT  
HARRLGMTGVGLKDDSD-----ALLPASQAEA-----ERLAQE-----  
>gi|120555852|ref|YP\_960203.1| ethanolamine ammonia-lyase small subunit  
[Marinobacter aquaeolei VT8]  
-----  
-----MTNSKFPTVVHNPWRGLRQYTPARIG

SupplementalMultipleSequenceAlign.txt

LGRAGVSLPTAELLEFLAHLARARDAVHHPLDIEQLIIEFQ-QIPEMSALGPP-----IQL  
QSQAPDRACYLQRPDLGRVLSSESSSSSLQSSKT-----GSAEPP-----DLAIVIA  
DGLSARAVQQNAPAFMRSLFRKLADHGPE--WRVAPLLVEQGRVAIGDHIGQVLQTQQV  
VVLIGERPGLSSPDSLGVYLTHHPEPG-LPDARRNCVSNIR-PAGLGVEQASEKVIYLLK  
EARQLGTSGVALKDRSE-----EVELTVSKRGNFLV-----  
>gi|184158621|ref|YP\_001846960.1| ethanolamine ammonia-lyase, small subunit  
[Acinetobacter baumannii ACICU]

-----MKLNLDIQYPSSTHQDQWEKLLKQFTDARIA  
LGRAGCSIPTRALLEFQLSHAQAKDAVYQEMDVSYLSEQLA-----QQQLQS-----FHI  
QSNAPNKEIYLRKPDGRQLSNPSKDTLIKKYA----ENPQQY-----DVCIVVG  
DGLSARAIEANAIAFIAALSEHIQQE---N-WSLAPIVLATGSRVALGDEVAEIFKASML  
VMLIGERPGLSSPDSMGIIYTTWNAYSG-CLDSKRNCISNVR-SAGLSIPVAVQRLMALMR  
KSKQLGFGSGVNLKDEHQ-----LSNIDHNENAK-----LLF-----  
>gi|169795571|ref|YP\_001713364.1| ethanolamine ammonia-lyase light chain  
(ethanolamine ammonia-lyase small subunit) [Acinetobacter baumannii AYE]

-----MKLNLDIQYPSSTHQDQWEKLLKQFTDARIA  
LGRAGCSIPTRALLEFQLSHAQAKDAVYQEMDVSYLSEQLA-----Q-QQ-LQS-----FHI  
QSNAPNKEIYLRKPDGRQLSNPSKDTLIKKYAE----NPQQY-----DVCIVVG  
DGLSARAIEANAIVFIAALSEHIQQE---N-WSLAPIVLATGSRVALGDEVAEIFKASML  
VMLIGERPGLSSPDSMGIIYTTWNAYSG-CLDSKRNCISNVR-SAGLSIPVAVQRLMALMR  
KSKQLGFGSGVNLKDEHQ-----LSNIDHNENTK-----LLF-----  
>gi|154247954|ref|YP\_001418912.1| ethanolamine ammonia-lyase [Xanthobacter  
autotrophicus Py2]

-----MIARDPWAAFSRHTPARIA  
LGRTGASLPTEEVLRFAHAHAQARDAVHTPFADAGVTADVE-----S-LG-FAT-----LRV  
SSAAPARDIYLRKPDGRRLSDDSRAMLEA-----AAGDPV-----DLALVVA  
DGLSSAAIHAQTKPFLAFAFKPFIQQ---G-WSLAPVLIASGARVALGDEVGALLKARAC  
VLLVGERPGLSSPDSLGLYLTDFDPQVG-RTDAERNICISNVR-PEGLSFEAAAFKLAWHIR  
EALRRQVTGVGLKDESD-----LLENGRAPA-----LLSAS-----  
>gi|206577048|ref|YP\_002240183.1| putative ethanolamine ammonia-lyase, light chain  
[Klebsiella pneumoniae 342]

-----MNRPDawnPLREFTDARIA  
LGRSGASLPTEVLNFGLAHARARDAIHQPFASQQLVAPLA-----A-LG-LDA-----LTV  
HSAAPDRHTYLRKPDGRQLADESRADLAA-----SGVRPA-----DLLLLVIG  
DGLSSWAVERQAVPLIRALLPYLQTL---G-IGLAPVVLAHQSRVALGDDIGETLKARAV  
AILIGERPGLSSPDSLGVYLTWQPHRQ-RLESERNICISNIR-PEGLSHDAAAFKLAWLLE  
QAFLLRRTGVGLKDESD-----NPALHGKIKP-----LPPLKE-----  
>gi|152968879|ref|YP\_001333988.1| ethanolamine ammonia-lyase small subunit  
[Klebsiella pneumoniae subsp. pneumoniae MGH 78578]

-----MNRPDawnPLREFTDARIA  
LGRSGASLPTEVLNFGLAHARARDAIHQPFASQQLVAPLA-----A-LG-LEA-----LTV  
HSAAPDRHTYLRKPDGRQLADESRADLAA-----SGVRPA-----DLLLLVIG  
DGLSSWAVERQAVPLIRALLPYLRTL---G-IGLAPVVLAHQSRVALGDDIGETLKARAV  
AILIGERPGLSSPDSLGVYLTWQPHRQ-RLESERNICISNIR-PEGLSHDAAAFKLAWLLE  
QAFLLRRTGVGLKDESD-----NPALHGKIKP-----LPPLK-----  
>gi|119900119|ref|YP\_935332.1| putative ethanolamine ammonia-lyase small subunit  
[Azoarcus sp. BH72]

-----MSQPHIPPHLDADPWADLRAAYTAARLA  
LGRAGASLPTEAVLRFGLAHAQARDAVHIALDTAVLQAELE-----ADGFDT-----LLA  
HSAAPDRGSLARPDGRRLADDSARLRNH-----ATTSGC-----DLLLLVIG  
DGLSSLAVARNARPLVAEIRRGLPAG-----WTLGPVVIATQARVALADEIGQALGARLV  
AMLIGERPGLSSPDSLGLAYLTWAPQPG-RSDAQRNCISNIR-PEGLGYAEATRRLWWLCA  
EARRLGLTGVALKDNDSD-----SALPGADTPP-----ALPAADGQAQDHQ--  
>gi|83592367|ref|YP\_426119.1| ethanolamine ammonia-lyase small subunit  
[Rhodospirillum rubrum ATCC 11170]

SupplementalMultipleSequenceAlign.txt

LGRSGDALPTTALLEFQIAHARARDAVHGAI DAELARAF A-----P-----LPT-----ATV  
HSAASDRAVYLRRPDLGRRLDDESAARLDALG-----EGGQGW-----DVVFVIA  
DGLSAAVAHAQATVRAALET LGGR-----LSVGPLVIASQSRVALGDDIGARLKARMV  
AVLIGERPGLSVADSLGAYITFDPRPG-RRDSERN CISNIH-ADGLHADQAARTLCWLVE  
EGLRRRITGIGLKEEAQ-----PRLGAGEGGNLP-----VLDPDRLGELSS--  
>gi|89055067|ref|YP\_510518.1| ethanolamine ammonia-lyase small subunit [Jannaschia  
sp. CCS1]  
-----MSDHLPGHLSAITQARLT  
LGPRRRTQDTRTALAFALDHARAREAVLSELDVDGLATTLA-----VADLSH-----DVV  
TSAAGSRD TYIRRPDLGRRLSPEDRARL-----TPQEPC-----DVALVLG  
DGLSAIAVALNGAAFVVALANKLGAC---G-LGTSDVILARQARVALGDDIAQALGAQTV  
VMALGERPGLSAADSLGVYITKNPTAT-TPDSARNCLSNIR-EAGLPVADAAHQATTLIK  
AMRAFGGSGVALNTALQ-----KNRRLDGD DSASPHRL-----  
>gi|73539313|ref|YP\_299680.1| ethanolamine ammonia-lyase small subunit [Ralstonia  
eutropha JMP134]  
-----MTKPPATVTQQNPWQQLRQFTRARIA  
LGRAGHSQTTDTVLAFLGHAHQARDAVHPLDRAAVESALS-----NAGFAT-----LSV  
RSAAPDRAHYLRRPDLGRRLDDASRDRLSAA-----RADSP-----DVVFVIA  
DGLSALAAQRHGVPVLRVRDRLPHD-----WTVAPVVIAEQSRVALGDEAGELLGARQV  
VMLIGERPGLSSPDSLGLYLTYAPRIG-RTDAERN CISNIR-PEGLAYERAANRLVFLLR  
GAAALGCSGVALKDDSA-----HVL PDEAAGP-----GNAIET-----  
>gi|116622921|ref|YP\_825077.1| ethanolamine ammonia-lyase light chain [Solibacter  
usitatus Ellin6076]  
-----MAIDLRAFTPARVG  
LARSGNSLATEELLRFQLDHARARDAVYFELDPAAIT-----LPH-----LLV  
RSAADRATFLRRPDLGRRLDEESRALLAR-----GDY-----DAAIVIA  
DGLSAPAVHHHAAALLEVLLPKLT-----G-WRLAPLTVAVQARVALGDEIGEALGARMA  
VVLIGERPGLTSPDSLGIYLTWDPRRG-RNDAQRNCISNVR-TEGIGYELAAHKLHSLME  
ASRVRQLSGVALKEDAK-----SLPG-----  
>gi|126441336|ref|YP\_001060931.1| ethanolamine ammonia-lyase small subunit  
[Burkholderia pseudomallei 668]  
-----MSDGVEKNPWGQLKSFTNARIA  
LGRAGNSLPTAPLLAFNL SHAQARDAVHQPLDADALRRDIE-----AAGLPT-----LGV  
QSAAPDRQH YLRRPDLGRRLADDSRALLAAHGA-----ALGEAP-----DLVFVVG  
DGLSAFAAAKQALPLLNAMRPKLD-----G-WRVGPVVVARQARVALGDEIGELLGARLV  
AMLIGERPGLSSPDSLGVYLTYPKVG-CHDAQRNCISNVR-PEGLPHDAAA HKLHYLLT  
HARRLGITGVGLKDDSD-----ALLPAAQAQT-----RRPVPGLAQE-----  
>gi|53720980|ref|YP\_109966.1| ethanolamine ammonia-lyase small subunit [Burkholderia  
pseudomallei K96243]  
-----MSDGVEKNPWGQLKSFTNARIA  
LGRAGNSLPTAPLLAFNL SHAQARDAVHQPLDADALRRDIE-----AAGLPT-----LGV  
QSAAPDRQH YLRRPDLGRRLADDSRALLAAHGA-----ALGEAP-----DLVFVVG  
DGLSAFAAAKQALPLLNAMRPKLD-----G-WRVGPVVVARQARVALGDEIGELLGARLV  
AMLIGERPGLSSPDSLGVYLTYPKVG-CHDAQRNCISNVR-PEGLPHDAAA HKLHYLLT  
HARRLGITGVGLKDDSD-----ALLPAAQAQT-----RRLAPGPAQE-----  
>gi|110639426|ref|YP\_679635.1| ethanolamine ammonia-lyase small subunit [Cytophaga  
hutchinsonii ATCC 33406]  
-----MEEDYWKELRKFTHARIA  
IGRAGNALPTSEVLKFRMAHAIARDAVQSEVNMELLQEKL F-----D-LG-LNV-----QQV  
KSHAADRLDYIRHPHKGRLLHEQSRQQL EA-----LHIEKT-----DLCIIFA  
DGLSADAVNLHAIPFLTILLKNLSF-----WNIAPVVLAEQGRVGLSDPVGEALNARIS  
LILLGERPGLSAP TSLGAYITYMPQSG-NTDEKRNCVSNIQ-PAGLSYEQAVEKISYLLH  
EMRRQQVSGIMLKDNQ-----NNFLY-----  
>gi|15599220|ref|NP\_252714.1| ethanolamine ammonia-lyase small subunit [Pseudomonas  
aeruginosa PA01]  
-----MNDKHL PDASAENPWLPLRQLTPARIA

SupplementalMultipleSequenceAlign.txt

LGRTGTSLPTRPQLDFQYAHQAQARDAVHLPFDHAAISDGLR-----QRGRDS----LLL  
HSAAADRHVYLQRPDLGRRLDEASVQRLREHAA----GYDGQI-----DLAIVVA  
DGLSALAVQRHTLPFLERLEEALAE---G-WSLSPVVLVEQGRVAVADEIGELLRAKMS  
VILIGERPGLSSPDSLGLYFTWAPRVG-LTDAYRNCISNVR-LEGLSYGMAAHRLLYLMR  
EACRRQLSGVNLKDEAE-----VQALDGEAPRT-----GNFLLARD-----  
>gi|115350176|ref|YP\_772015.1| ethanolamine ammonia-lyase small subunit  
[Burkholderia ambifaria AMMD]  
-----MSDAVEKNPWAQLRSFTNARIA  
LGRAGNSLPTAPLLAFNL SHAQARDAVHQPLDADALRREIE-----AAGLLPT----LGV  
QSAAPDRDHYLRRPDLGRKLSDDSRGLLAGYGA----ALDDAP-----DVVFVVG  
DGLSAFAAAKQALPLLQAVRPRLDAD---G-WRIGPVVVATQARVALGDEIGELLRAKVV  
AMLIGERPGLSSPDSLGVYLTWAPKVG-CHDALRNCISNVR-PEGLPHAAAAHKLHLYLMT  
HARRLGLTGVLKDDSD-----ALLPQADAERIGAE-----  
>gi|53724040|ref|YP\_104487.1| ethanolamine ammonia-lyase small subunit [Burkholderia  
mallei ATCC 23344]  
-----MSDGEKNPWGQLKSFTNARIA  
LGRAGNSLPTAPLLAFNL SHAQARDAVHQPLDADALRRDIE-----AAGLPT----LGV  
QSAAPDRQHLYLRRPDLGRRLADDSRALLAAHGA----ALGEAP-----DLVFVVG  
DGLSAFAAAKQALPLLNAMRPKLD----G-WRVGPVVVARQARVALGDEIGELLGARLV  
AVLIGERPGLSSPDSLGVYLTYPKVG-CHDAQRNCISNVR-PEGLPHDAAAHLHLYLLT  
HARRLGITGVGLKDDSD-----ALLPAAQAQT----RRLAPGPAQE-----  
>gi|107024467|ref|YP\_622794.1| ethanolamine ammonia-lyase small subunit  
[Burkholderia cenocepacia AU 1054]  
-----MSDAVEKNPWAQLKSFTNARIA  
LGRAGNSLPTAPLLAFNL SHAQARDAVHQPLDADALRREIE-----A-AGLLPT----LRV  
QSAAPDRDHYLRRPDLGRKLSDDSRGLLAGYGA----ALDDAP-----DVVFVVG  
DGLSAFAAAKQALPLLQAVRPRLDAD---G-WRIGPVVVATQARVALGDEIGELLRAKVV  
AMLIGERPGLSSPDSLGVYLTWAPKVG-CHDALRNCISNVR-PEGLPHAAAAHKLHLYLMT  
HARRLQLTGVLKDDSD-----ALLPAAEAERIGATT-----  
>gi|134294259|ref|YP\_001117994.1| ethanolamine ammonia-lyase small subunit  
[Burkholderia vietnamiensis G4]  
-----MSDAVEKNPWAQLKAFTNARIA  
LGRAGSSLPTAPLLAFNL SHAQARDAVHQPLDSEALRRELD-----TAGFAT----LGV  
QSAAVDRQHLYLRRPDLGRKLSDDGRALLAGYGA----MLDDAP-----DVVFVVG  
DGLSAFAAAKQALPLLQAVCPRLHAD---G-WRLGPVVVATQARVALGDEIGELLRARAV  
AMLIGERPGLSSPDSLGVYLTWAPKVG-CHDAQRNCISNVR-PEGLPHAAAAHKLHLYLMT  
EARRLRITGVGLKDDSD-----ALLPPQAERIGAA-----  
>gi|152994513|ref|YP\_001339348.1| ethanolamine ammonia-lyase small subunit  
[Marinomonas sp. MWYL1]  
-----MSQEDKSFPTHPHAEPVTENAWSKLNFTDARVG  
LGRSGVSVPTKHL LAFQLAHAQAIDAVHTQLD TDALSKAMM--EQDWAKDWTKHCAPLLL  
HSRATDRSTYLQRPDYGRRLDDESANKLDEHRV----STSQDY-----DLAIVVV  
DGLSSLAVEQNTLPFLQALSSHIN-----G-WNLAPVCFVKQGRVAIGDDVCERLNAKCV  
LVLIGERPGLSSPDSLGLYLTWGGKVG-LTDAYRNCISNVR-PAGLVYQEAARKAFYLLK  
EARTLKLSGVKLKDRSD-----DDLIVDTSKES-----KNFLIS-----  
>gi|206558464|ref|YP\_002229224.1| ethanolamine ammonia-lyase small subunit  
[Burkholderia cenocepacia J2315]  
-----MSDAVEKNPWAQLKSFTNARIA  
LGRAGNSLPTAPLLAFNL SHAQARDAVHQPLDADALRREIE-----A-AGMLPT----LRV  
QSAAPDRDHYLRRPDLGRKLSDDSRGLLAGYGA----ALDEAP-----DVAFVVG  
DGLSAFAAAKQALPLLQAVRPRLDAD---G-WRIGPVVVATQARVALGDEIGELLRAKVV  
AMLIGERPGLSSPDSLGVYLTWAPKVG-CHDALRNCISNVR-PEGLPHAAAAHKLHLYLMT  
HARRLGLTGVLKDDSD-----ALLPAAEAER----IGVTT-----  
>gi|116694057|ref|YP\_728268.1| ethanolamine ammonia-lyase small subunit [Ralstonia  
eutropha H16]  
-----MTARRPPPADPANTDADPWQRLRQFTRARVA

SupplementalMultipleSequenceAlign.txt

LGRTGHSQTTDAVLAFLGLAHAQARDAVHPLDVGAVTAALD-----AAGVPN----LAV  
HSAAPDRAHYLRPDLGRRLLDDASRARLAAA-----RPGEP-----DVVFVVA  
DGLSALATQTHALPLLDATRPLT-----WRIGPVVVAEQSRVALGDEIGELLGARQV  
VMLIGERPGLSSPDSLGIYLTAPRTG-RTDAERNICISNVR-PEGLPYAQAADRLAFLLR  
GAAALGRSGVDLKDDSV-----PALPEG-----  
>gi|29831088|ref|NP\_825722.1| ethanolamine ammonia-lyase small subunit [Streptomyces  
avermitilis MA-4680]

-----MTNRPPAAYEGESDRAMWAALRRHTQARIG  
LGRAGSALPTRHRELEQAAHAAARDAVHTPFAPDVVAAALT-----G-FPT----IRV  
RSAAPDRDLGYLQRPDLGRRLLDAADRAHLP-----RDDW-----DVVFVVA  
DGLSSRAVHEHAAAMVHATTALLPAD-----LRVAPVVLAEQARVALGDDIAHAMGARMT  
VVLVGERPGMSAADSLGAYLTYAPRPGTTDADRNCLSNIRPPLGLAYATAAARLTALMK  
RAHELGRGTGVDLKDEST-----ESAEAPALPTTT-----  
>gi|220919792|ref|YP\_002495095.1| Ethanolamine ammonia-lyase light chain  
[Methylobacterium nodulans ORS 2060]

-----MN-----KPVKEPAPPSSGRSIADPWAALRGVTPARIG  
LGRSGNAIPTRGVLDQYAHALARDAVHEPLDVAALTRALQ----P----LRT----IAV  
ASNVPDRGTYLRPDLGRVLSPELSTAFE-----GLKPA-----DIVFVVA  
DGLSATGIQAHAAPLVHACATELA-----D-WDIGPIVLAVQGRVALGDDIAARLGARLC  
VMIIGERPGLTVSDSIGIYLTFGPRPG-RQDSERNICISNIHPNGGLSSTQAACKLGWLAR  
EALRRQYSGVALKDDMP-----SILESGAGAP-----KLSSS-----  
>gi|94314822|ref|YP\_588031.1| ethanolamine ammonia-lyase small subunit [Ralstonia  
metallidurans CH34]

-----MSTPANPEDPWARLRQFTRARIA  
IGRTGHAQKTASILAFGLAHAQARDAVHLALDVAALLETALR---DAGLDALHV----LHA  
HGAAADRDRQYLRRPDLGRSLDAESRARLV-----PSAQPY-----DVVFVIA  
DGLSALAAQRHAVPLLQAVLARLHD-----WRVGPVVVARQSRVALGDEIGERL GARQV  
VMLIGERPGLSSPDSLGIYLTDFPRVG-RTDAQRNCISNVR-PEGLSYAQAADRLVFLMQ  
GAVALGRSGVDLKDDSA-----AVSAALSPP-----  
>gi|146283994|ref|YP\_001174147.1| ethanolamine ammonia-lyase small subunit  
[Pseudomonas stutzeri A1501]

-----MNHIPNPWQHRLQLTPARIA  
LGRAGTSLPTVAQLDFQYAHQAQARDAVHPLDCAALTAELD-----KHGLAC----LPL  
HSAASDRQTYLQRPDLGRRLLDETSAAATLDA-----EAGDGC-----DLALVIA  
DGLSALAVQRHAAPMALKIAEQCAE---G-WSLGPVALVEQGRVAVADEIGQRLKARMV  
VILLGERPGLSSPDSLGLYFTWAPQVG-RHDAQRNCISNIR-PEGLSYNLAHRLLYLMR  
EASRRQLSGVQLKDEAD-----VPALDGQPR-----GNFLLD-----  
>gi|152987704|ref|YP\_001346467.1| ethanolamine ammonia-lyase small subunit  
[Pseudomonas aeruginosa PA7]

-----MNDKHLPDASAENPWLPLRQLTPARIA  
LGRTGTSPLPTRPQLDFQYAHQAQARDAVHPLDHASIGDGLR-----QRGRDS----LLL  
HSAADRHVYLRPDLGRRLLDEASVRRLEHAA----GYDGQI-----DLAIVVA  
DGLSALAVQRHTLPFLERLEEALAE---G-WSLSPVVLVEQGRVAVADEIGELLRARMV  
VILIGERPGLSSPDSLGLYFTWAPRVG-LTDAYRNCISNVR-LEGLSYGMAAHRLLYLMR  
EACRRQLSGVNLKDEAE-----VQSLEGDAPRT-----GNFLLRD-----  
>gi|162146134|ref|YP\_001600593.1| putative ethanolamine ammonia-lyase light chain  
[Gluconacetobacter diazotrophicus PA1 5]

-----MTAHDLTDPASDPWGPLRRLTSARIG  
QARTGDTVAGAEVRAFQLAHARARQAVLAPLRTALGLDEA----F-----VPV  
RSQAADRGEFVRRPDLGRRLLSPDSAAGLVP-----GSY-----DIAFVIA  
DGLSALAAERQGPVLAACRALLP-----G-WRIAPVVVAHNARVALGDDIAQRLGARC  
VMMIGERPGLSVAESLSLYMTWDPYPG-RMDSERNICISNIHPHGGLTPRQAAATLARLLN  
EARRIGASGIVLKDEAG-----ARIA-----  
>gi|145297994|ref|YP\_001140835.1| ethanolamine ammonia-lyase, light chain [Aeromonas  
salmonicida subsp. salmonicida A449]

SupplementalMultipleSequenceAlign.txt

LGRTGVS LPT EALLAFGLAHAQARDTVHQPLEVAALTKALH-----A-TG-HKV-----LTV  
QSAATSREEYLHRPDLGRRLNDASRLLLSQLPQT---EADLAPLEYQTRQAEADLVIMLG  
DGLSSTALHQNALPFIEALQPHLRRLL---G-LACAPLVIASQARVALGDEVGELL SARAV  
LVMIGERPGLSSPDSLGLYL TWQPRVG-CMDSQRNCISNVR-PAGLDFPQAAHKLAWLLE  
QAFNRRLTGVALKDESG-----ELASLIEHDAPRP-----PCRPA-----  
>gi|146307705|ref|YP\_001188170.1| ethanolamine ammonia-lyase light chain  
[Pseudomonas mendocina ymp]

-----  
-----MANDLIQHNPWDELRAHTSARIA  
LGRVGC SLPTREVLK FGLAHAQARDAVHRPLDFAELKHQLH-----AAGFRA-----LKV  
RSNAEDRQTYLLRPDHGRHLHGDCRLQLQ-----HEL PAP-----ELAIVLA  
DGLSAVAVQRHALPLLQAFRERFATD-----WANTPVVLAEQGRVAIGDGIGEALRARLV  
IVMIGERPGLTSPDSLGLYLTYAPRVG-CPDSARNCISNVR-PEGLPYELAAHKLDYLTR  
QALRLQLSGVQLKDDSS-----LQVVAQP-----D-----  
>gi|188581161|ref|YP\_001924606.1| Ethanolamine ammonia-lyase [Methylobacterium  
populi BJ001]

-----  
-----MSTQTDALWRRLARLTPARIG  
LGRAGAGLPTREVLK FGLAHAQARDAVHTPMDAAAIA GAVE-----A-LG-LPT-----VTV  
TSGAEDRATYLLRPDYGRRLSPEGLKALSD-----TAAEPV-----DLALVVA  
DGLSARAVHEGAAALLAAFKPHAERA---G-WRLAPVVVATQARVALGDAAGAALRARAV  
VVVIGERPGLSSPDSLGLYVTFDPKPG-RSDAERN CISNVR-PAGLSFDLAAFKNWLLT  
QAFARGLTG VNLKDESD-----RLIEAGTPDP-----AIGRG-----  
>gi|91792432|ref|YP\_562083.1| ethanolamine ammonia-lyase small subunit [Shewanella  
denitrificans OS217]

-----  
-----MRPSELVQADPWPELMAFTQARIS  
LGRVGTSLPTAQVQALALAHAMARDAVHLPLDVPLLAQGLK-----D-LG-FDT-----LTV  
TSQANNRSQYLLRPDLGRRLHERHFAELEQ-----YQRERP-----SLLL VIA  
DGLSSLAVARHSLPLIKEMSTR LPKD-----WTLAPVVIATQGRVALGDEIAQRLNATMV  
AILIGERPGLTTPDSLGVYFTYAPRVG-CSDAMRNCISNIH-PQGLDYASAATKLIWLAK  
EALKRRVSGVMLKDTAP-----VNHSLT-----  
>gi|218886349|ref|YP\_002435670.1| Ethanolamine ammonia-lyase [Desulfovibrio vulgaris  
str. 'Miyazaki F']

-----  
-----MD-----  
-----RAPHDDPAAGPAPVTDDTWSDLRRHTEARIA  
LGRCGVSLPHDRWLD FRMAHAKARDAVLT PPFDMAGVRAALE-----R-GG-VQC-----LEL  
HSAAADTAEFLARPDKGRQLSDASRGILREAAAGQAKGASGAK-----GADICVVVS  
SGLSARAVHENAAPFALRFLEQARAA---G-YTATPVALVDHGRVAVADEVAHMLGARLV  
VMLIGERPGLSSPNSLGVYLTHAPVPG-CTDEARN CISNVR-PGGLAIEEGVRKLCYLVQ  
GAFAVGLTG VNLKDDMP-----GDYLPFAPAHALAD-----  
>gi|222107181|ref|YP\_002547972.1| ethanolamine ammonia-lyase small subunit  
[Agrobacterium vitis S4]

-----  
-----MSNSVDFDPFARFRSATRARI G  
LGRAGDAMPTQAVLEFQLAHARARDAVHGEVDFEKLATALA-----P-----IET-----VLV  
HSLAKDRATYLLTRPDLGRMPD SHDLP-----APGKTY-----EIAFIIA  
DGLSAAAVERHAVSVYEATVRR LG-----G-FSVAPVILGKQARVAFGDEAAAAFGAQVA  
IVLIGERPGLSVPDSL GAYITFEPRKG-RRDSERN CISNIH-DDGLSYESAAEKISWLVK  
EALRLKLSGVDLKENAV-----DGISLPHGAKSLT-----  
>gi|172059196|ref|YP\_001806848.1| ethanolamine ammonia-lyase small subunit  
[Burkholderia ambifaria MC40-6]

-----  
-----MSDAVEKNPWAQLRSFTNARIA  
LGRAGNSLPTAPLLAFNL SHAQARDAVHQPLDADALRRDIETCGLPTAGLLPT-----LGV  
QSAAPDRDHYLRRPDLGRKLSDDSRGLLAGYGA---ALDDAP-----DVVFVVG  
DGLSAFAAAKQALPLLQAVRPRLDGD---G-WRIGPVVVATQARVALGDEIGELLRAKVV  
AMLIGERPGLSSPDSLGVYL TWAPKVG-CHDALRNCISNVR-PEGLPHAAAAHKLH YLMT  
QARRLG L TGVLKDDSD-----ALLPQADAERIGAE-----  
>gi|109897750|ref|YP\_661005.1| ethanolamine ammonia-lyase small subunit  
[Pseudoalteromonas atlantica T6c]

-----  
-----M  
KKYND ESSHVS-----NMVNSHASMTSSEVVNNPWRTL RRYTNARIG

SupplementalMultipleSequenceAlign.txt

LGRAGISLPTSEMLGFQLSHAKARDAVKLRDLTEELQHKLT-----E-FSSVLP-CPPMML  
HSQAFDRRTTFLQRPDLGRKLNDSRNLKLFMTQQAGTTQPDY-----DLAIVVA  
DGLSSIAVQYVQPLLRQLITLLKHE--SESWRLAPLTVVEQGRVAVGDEVGEYLNAAKAV  
LMLIGERPGLSSPDSLGLYFTWAPEIG-LTDARRNCISNIR-PAGLGYDDAAHRALYLLK  
EARRLNLSGVALKDRSD-----SPALNALKTNAVPK-----RSFLTGPS-----  
>gi|161523308|ref|YP\_001578320.1| ethanolamine ammonia-lyase small subunit  
[Burkholderia multivorans ATCC 17616]  
-----MSDAVEKNPWSELKSFTNARIA  
LGRAGSSLPTAPLLAFNL SHAQARDAVHQPLDADALRRELD-----AAGFAT----LGV  
QSAAPDRQHLYRRPDLGRKLSDDGRALLAGYGA----ALDDAP-----DIVFVVG  
DGLSAFAAAKQAVPLLRVVRPLEAD---G-WQIGPVIVATQARVALGDEIGELLRAKLV  
AVLIGERPGLSSPDSLGVYLTWAPKVG-CHDAQRNCISNVR-PEGLSYDAAHKLHLYLV  
HARRLGLTGVLKDDSD-----ALLPAAQPERIGAACDRAT-----  
>gi|111023048|ref|YP\_706020.1| ethanolamine ammonia-lyase small subunit [Rhodococcus  
jostii RHA1]  
-----MSDPVVQDFWAELRATTQARIG  
LGRTGDALPTQRVLEFRSAHAAARDVAVHQPLDAEALAEQVE----A-VGLGRP----VVV  
TSQASDRSEYLRPDLGRTPADLSA-----VPAVTA-----EVGFVLA  
DGLSPRALTDHGVSLLSALVDEFGGT-----YSLAPPVIATQARVALGDHIAQALGVQTL  
VLLIGERPGLSVADSVGVYLTHTLPRPG-RTDADRNCVSNIHPEGLGYELAAARVVAGLVS  
GARKLGRSGVELKDTSR-----ADALAAPSEILEL-----  
>gi|78064787|ref|YP\_367556.1| ethanolamine ammonia-lyase small subunit [Burkholderia  
sp. 383]  
-----MSDAVEKNPWAQLKSFTNARIA  
LGRAGNSLPTAPLLAFNL SHAQARDAVHQPLDSDALRRELD-----AAGFAT----LGV  
QSAAPDRQHLYRRPDLGRKLSDEGRALLAAHGDA---ASGDGP-----DVVFVVG  
DGLSAFAAAKQALPLLQAVRPLDAD---D-WRIGPVVVATQARVALGDEIGELLRAKVV  
AMLIGERPGLSSPDSLGVYLTWAPKVG-CHDALRNCISNVR-PEGLPYAGAAHKLHLYLMT  
HARRLGLTGVLKDDSD-----ALLPQAEAEERIGAD-----  
>gi|220921384|ref|YP\_002496685.1| Ethanolamine ammonia-lyase light chain  
[Methylobacterium nodulans ORS 2060]  
-----MSPEEAWRRLSALTPARIG  
LGRAGSGLPTRAVLGFALAHQAQARDAVHTPLDVAALRAGIE----A-LG-LRN----VAV  
ASAAPDRATYLRPDLGRRLEGLSAERLAA-----AAAAPV-----DLAIVVA  
DGLSARAIHEGAVPLLSVLAPAIAGS---G-WSLAPVVVAEQARVALGDAVGAALKARAV  
AVLIGERPGLSSPDSLGIYLTDFPRPG-RTDAERNCLSNVR-AAGLKPELAAFKLHWLIG  
QAFQRGLTGVALKDESD-----RLLGAEAATPLPG-----  
>gi|170739180|ref|YP\_001767835.1| ethanolamine ammonia-lyase [Methylobacterium sp.  
4-46]  
-----MSADETVRPAQAKPPEEALTAEEALTAEEALTPEEAWGRLKALTPARIG  
LGRAGSGLPTREVLAFALAHQAQARDAVHAPLDAAALRAGIE----G-LG-LPV----LAI  
ASRAPDRATYLRPDLGRQPDPEGLARLAA-----AAGDPV-----DLAIVVA  
DGLSARAVHEGAVPLLAALAPAIAGS---G-WSLAPIVLAEQARVALGDAVGAALRARAV  
AVLIGERPGLSSPDSLGIYLTLDPRPG-RTDAERNCLSNVR-AAGLRPDAAFKLHWLLG  
EAFRRGLTGVALKDESD-----RLLGSDAAAP-----LTAPP-----  
>gi|163851380|ref|YP\_001639423.1| ethanolamine ammonia-lyase [Methylobacterium  
extorquens PA1]  
-----MSTQDTLWQRLARLTPARIG  
LGRAGAGLPTREVLKFLGHAQAQARDAVHTPMDAAAIAAGIE-----VLGLPT----VTV  
TSGAEDRATYLRPDPYGRRLSPESLKALSDSAAD---SAAEPV-----DLAIVVA  
DGLSARAVHEGAAALLAAFKPHAEAA---G-WRLAPVTIATQARVALGDAAGAALRARAV  
VVVIGERPGLSSPDSLGLYVTFDPKPG-RSDAERNCLSNVR-PAGLSFELAAFKLNWLLT  
QAFSRGLTGVLKDESD-----RLLEAAAPDP-----AIGGF-----  
>gi|116254099|ref|YP\_769937.1| ethanolamine ammonia-lyase small subunit [Rhizobium  
leguminosarum bv. viciae 3841]



SupplementalMultipleSequenceAlign.txt

LGRAGDALPTSAILDFQLAHARARDAVHGQVDFVALAKQLA-----P-----VPT-----VRI  
RSRAKDRTIYLARPD LGRTNTADLP-----SSGDRY-----DIAFIIA  
DGLSASAVEHHA VPLFKACMKRL--G---D-FSVAPVILGEQARVAFGDEAAAAFGAEVA  
IVLIGERPGLSVPDSLGTITFRPQSG-RRDSERNICISNIH-ADGLGYEVAADKIVWIVR  
EALRLQLTGVDLKENAE-----GAIEALPHQES-----  
>gi|54024157|ref|YP\_118399.1| ethanolamine ammonia-lyase small subunit [Nocardia  
farcinica IFM 10152]

-----MEIDNAADSPQDVWAPLRRTTQARIG  
LGRTGNALPTRRVLEFRAAHAARDVHLPFDAADFAERIA-----A-VGLGAP-----SVV  
RSNAGDRGEYLRRPDLGRTPADLSA-----VPRTDA-----DIGIVLA  
DGLSPRALDEHGPGLLEALAAELRPH-----YRLAPPVLAVQARVALGDHIGAALGVGTL  
IVLIGERPGLSVADSLGIYLTHTLPRPG-RTDADRNCVSNIHPPPEGLGYQRAAAITAALVA  
GARRLGRSGVALKDTSG-----DELAGTESLVLD-----  
>gi|218530188|ref|YP\_002421004.1| Ethanolamine ammonia-lyase [Methylobacterium  
chloromethanicum CM4]

-----MST---QDTLWQRLARLTPARIG  
LGRAGAGLPTREVLFKGLAHAQARDAVHTPMDAAAIA GAVE-----A-LG-MPT-----VTV  
TSGAEDRATYLRPPDYGRRLSPESLKA LSDSAAD---SAAEPV-----DLAIVVA  
DGLSARAVHEGAAALLA AFKPHAEAA---S-WRLAPVTIATQARVALGDAAGAALRARAV  
VVVIGERPGLSSPDSLGLYVTFDPKPG-RSDAERNICISNVR-PAGLSFELAAFKLNWLLT  
QAFSRGLTG VNLKDESD-----RLLEAAAPDP-----AIGGF-----  
>gi|183980688|ref|YP\_001848979.1| ethanolamine ammonia-lyase light chain, EutC  
[Mycobacterium marinum M]

-----MNAPDARAADDEVWALLRDVTQARIG  
LGRAGNSLPTRRVLEFQAAHAARDVHDPDLDVAGL TEQVR-----D-LGLGAP-----LVV  
RSQASSRSEYLRRPDLGRAPADLSI-----LPNTGA-----DIGIVLA  
DGLSPRALTDHGAGLLGALVREFHDR-----YRIAPPVIATQARVALGDHVGQALGVRTL  
LVIIGERPGLSVADSLGIYLTHTLPRPG-LTDADRNCISNIHPPDGLDYQTAAGIAAALVT  
GARKLGRSGVALKDTSR-----TELTADDTLGIG-----  
>gi|91977450|ref|YP\_570109.1| ethanolamine ammonia-lyase small subunit  
[Rhodopseudomonas palustris BisB5]

-----MDDNTNDRPPVTESPWSEWRKVSPARLA  
LGRVGTGLPTDEVLRFGWAHAMARDAIHAALDAPKLAATLQ-----Q-LG-WVT-----AQT  
RSHAPDRVTYLRPPDLGRVLDPEHAGKLRA-----LDVAAG-----NICIVIG  
DGLSSIAVERHAAPLLAALQPLLPAE-----LAGSPVVIATQARVALADEVADVLKSRLS  
IMLIGERPGLSSPDSLGIYITHAPFSG-RSDADRNCISNVR-PEGLSYAAAAFKLAWLVR  
EALGRGLTG VNLKDESD-----LTLLNGSVADLD-----RLPGPTK-----  
>gi|118616009|ref|YP\_904341.1| ethanolamine ammonia-lyase small subunit  
[Mycobacterium ulcerans Agy99]

-----MNAPDARAADDEVWALLRDVTQARIG  
LGRAGNSLPTRRVLEFQAAHAAGRDAVHDPDLDVAGL TEQVR-----D-LGLGAP-----LVV  
RSQASSRSEYLRRPELGRAPADLSI-----LPNTGA-----DIGIVLA  
DGLSPRALTDHGAGLLGALVREFHHR-----YRIAPPVIATQARVALGDHIGQALGVRTL  
LVIIGERPGLSVADSLGVYLTHTLPRPG-LTDADRNCISNIHPPDGLDYQTAAGIAAALVT  
GARKLGRSGVALKDTSR-----TELTVD DTLGIG-----  
>gi|148253762|ref|YP\_001238347.1| ethanolamine ammonia-lyase light chain  
[Bradyrhizobium sp. BTAi1]

-----MTRARVA  
LGRCGDGLPTQARLEFQMAHALARDAVWGKVNFD SIADALA-----P-----REV-----IKV  
ASAAPDRASYLRPPDLGRRLAAGAASQLPS-----GPF-----DLVFVIA  
DGLSADAVERHAADVVIATEARLP-----G-LAIGPVVLASQARVALGDDVGAAMRARLV  
AVLIGERPGLSAADSLGVYLTHTLHPAG-LRDSARNICISNIH-DHGLSAERAGEKLAWLVR  
EALRIGVTGIGLKEAAP-----DGAIETTHSTAEITHHKPTGARGHE-----  
>gi|169630907|ref|YP\_001704556.1| ethanolamine ammonia-lyase, small subunit  
[Mycobacterium abscessus]

-----MSHIANNVAAQNIWDTLRRSTQSRIG

SupplementalMultipleSequenceAlign.txt

LGRSGDALPTTRVLEFGTAHAAARDAVHTPLDAQALAGRID-----G-LGLGAP-----LLV  
TSRATDRSEYLRRPDLGRAPADGALDVLV-----GSGG-----DIGIVLA  
DGLSPRALDDHGVPLQLALHRRRLR-----G-YAIAPLVVATQARVALGDHIGAALGVDTV  
LVLIGERPGLSVADSVGIYLTNHPVVG-CTDAQRNCVSNIHPPPEGLGYDQAAQVVAALVA  
GARQIGRSGVDLKDMTG-----AGNQIEGAGP-----ALPT-----  
>gi|171059483|ref|YP\_001791832.1| ethanolamine ammonia-lyase [Leptothrix cholodnii  
SP-6]

-----MTPPVTPARWDTLRRYTDARIA  
LGRAGHSLPTAAHLAFLAQAQARDAVHLPFVDRGVSAALQ-----ALGLES-----LSL  
HSAADRAVYLRPDLGRRLDEPSRQALAQWRA-----GQSGRF-----DLAFVIA  
DGLSALAVHQNAVALISATLARLRSDPVQT-WSVAPIALVEEGRVAIGDEAGHGLRADAV  
VVLIGERPGLSSPDSLGIYITWAPGPG-LTDAARNICISNVR-PAGLSIDAAATRLHRLLA  
QARLRQLTGVALKDDVD-----EQPSALAPGQPKGDESDESFLAPTGPGRPGSQPD  
>gi|119944062|ref|YP\_941742.1| ethanolamine ammonia-lyase small subunit  
[Psychromonas ingrahamii 37]

-----MNKVVPSSSEEMVHKDPWEKLRQFTNARIG  
LGRVGTSIPTAELLRFQLSHAQAIIDAVHVPLDVEQLDQQA-----A-SDVLQPYLPIQKL  
HSKVRDRMEYLRPDLGRQLDDASIIYKLQK-----NTGESY-----DVFVVA  
DGLSSYAINHAKPFLDILINSLNQDPNKE-WKIAPLCLVLQGRVAVGDDVCEALNAKAV  
VLLIGERPGLSSPDSMGLYLTWNAKRG-IEDSQRNCVSNIR-PEGLYQAAAHKCRYLLN  
ESQRMKLSGVSLKDRSE-----DLQLESTTT-----QQFCLTI-----  
>gi|118473833|ref|YP\_885935.1| ethanolamine ammonia-lyase small subunit  
[Mycobacterium smegmatis str. MC2 155]

-----MTVSNDIAVQQFWDELKTTQARIG  
LGRAGNSLPTQQVLELAAAHAARDAVHVPLDVEALAAQVR-----E-VGIGEP-----IVV  
TSRATSRDEYLRRPDLGRQPAEGTE-----VPESGA-----DIGFVLA  
DGLSPMGLNHHGAALLKALVERLKDR-----HTLAPPIIATQARVGLGDHIGAQARVRTL  
LVIIGERPGLSVADSLGIYLTHTLPQPG-RTDADRNCISNIHPPDGLGYAEAAARVASTLVD  
GAVALGRSGVDLKDTSR-----DAALGPLSPHELA-----  
>gi|169629873|ref|YP\_001703522.1| ethanolamine ammonia-lyase, light subunit  
[Mycobacterium abscessus]

-----MTAGDVARQRFWKDLRLNTQARIG  
LDRAGNALHTRDVLDLAAAHAIAARDAVHVPLDIDRFAADVG-----A-LGLGVP-----VVV  
TSQVGSRAEYLRRPDLGRLPADLSA-----VARRPA-----DIGFVLA  
DGLSPTALMRHGVPLLRALRLGNA-----YTLAAPVIATQARVALGDHVAEQGRYRTL  
IVIIGERPGLSVVDSLGIYLTHTLPRSG-CTDADRNCISNIHPPDGLSYSEAARIAASLVG  
GALQLGRSGVELKDTSR-----ASAIDDPGLESGL-----  
=====

%% EutG [targeting tail implicated]

>gi++|16765781|ref|NP\_461396.1| putative transport protein [Salmonella typhimurium  
LT2]

-----MQAE  
LQTALFQAFDTLNLQRVKTFVSPVPTLCG-LGALGACGQEAQARGVSHLFVMVDSFLHQA  
GMTAPLARSAMKGVAMTVWPCPPGEPICITDVCAAVAQLREAACDGVVAFGGGSVLDAK  
AVALLVTNP--DQTL SAM----TEHSTLRPRLPLIAVPTTAGTG-----  
---SETTNVTVIIDAVSGRKQVLAHASLMPDV-----AILDAAV  
TEGVPPNVTAMT-----GIDALTHAIEAYSAL-NAT  
PF-----TDSLAI GAIAMIGKSLPKAVG-----YGHDLAARE-----NMLLAS  
CMAGMAFSSAG-----LGLCHAMAHQPGAALHIP-----HGQA---NAMLLPTVMG  
FNRMVCRERFSQIGRA-----LTNKKSDDRDAIAAVCELIAEVG  
QSKRLADAGAKPEH----YSAWAQAAL- DI-----CLRSNPRTATQAQIIDLYAAAG

>gi++|62181027|ref|YP\_217444.1| paral putative transport protein in ethanolamine  
utilization [Salmonella enterica subsp. enterica serovar Choleraesuis str. SC-B67]

SupplementalMultipleSequenceAlign.txt

-----MQAE  
LQTALFQAFDTLNLQRVKTFVPPVTLVCG-LGALGACGQEAQARGVSHLFVMVDSFLHQA  
GMTAPLARSLAMKGVAMTVWPCPPGEPICITDVCAAVAQLREAACDGVVAFGGGSVLDAAK  
AVALLVTNP--DQTL SAM----TERSTLRPRLPLIAVPTTAGTG-----  
---SETTNTVTIIDA VSGRKQVLAHASLMPDV-----AILDAAV  
TEGVPPNVTAMT-----GIDAL THAIEAYSAL-NAT  
PF-----TDSLAI GAIAMIGKSLPKAVG-----YGHDLAARE-----NMLLAS  
CMAGMAFSSAG-----LGLCHAMAHQPGAALHIP-----HGQA---NAMLLPTVMG  
FNRMVCRERFSQIGRA-----LTNKKSDDRDAIAAVSELIAEVG  
QSKRLADAGAKPEH---YSAWAQAAL E-DI-----CLRSNPRTATQAQIIDLYAAAG

>gi++|16761379|ref|NP\_456996.1| putative alcohol dehydrogenase [Salmonella enterica  
subsp. enterica serovar Typhi str. CT18]

-----MQAE  
LQTALFQAFNTLNLQRVKTFVPPVTLVCG-LGALGACGQEAQARGVSHLFVMVDSFLHQA  
GMTAPLARSLAMKGVAMTVWPCPPGEPICITDVCAAVAQLREAACDGVVAFGGGSVLDAAK  
AVALLVTNP--DQTL SAM----TERSTLRPRLPLIAVPTTAGTG-----  
---SETTNTVTIIDA VSGRKQVLAHASLMPDV-----AILDAAV  
TEGVPPNVTAMT-----GIDAL THAIEAYSAL-NAT  
PF-----TDSLAI GAIAMIGKSLPKAVG-----YQDLAARE-----NMLLAS  
CMAGMAFSSAG-----LGLCHAMAHQPGAALHIP-----HGQA---NAMLLPTVMG  
FNRMVCRERFSQIGRA-----LTNKKSDDRDAIAAVCELIAEVG  
QSKRLADAGAKPEH---YSAWAQAAL E-DI-----CLRSNPRTATQAQIIDLYAAAG

>gi++|197249493|ref|YP\_002147415.1| ethanolamine utilization protein EutG  
[Salmonella enterica subsp. enterica serovar Agona str. SL483]

-----MQAE  
LQTALFQAFDTLNLQRVKTFVPPVTLVCG-LGALGACGQEAQARGVSHLFVMVDSFLHQA  
GMTAPLARSLAMKGVAMTVWPCPPGEPICITDVCAAVAQLREAACDGVVAFGGGSVLDAAK  
AVALLVTNP--DQTL SAM----TERSTLRPRLPLIAVPTTAGTG-----  
---SETTNTVTIIDA VSGRKQVLAHASLMPDV-----AILDAAV  
TEGVPPNVTAMT-----GIDAL THAIEAYSAL-NAT  
PF-----TDSLAI GAIAMIGKSLPKAVG-----YGHDLAARE-----NMLLAS  
CMAGMAFSSAG-----LGLCHAMAHQPGAALHIP-----HGQA---NAMLLPTVMG  
FNRMVCRERFSQIGRA-----LTNKKSDDRDAIAAVSELIAEVG  
QSKRLADAGAKPEH---YSAWAQAAL E-DI-----CLRSNPRTATQAQIIDLYVAAG

>gi++|161612793|ref|YP\_001586758.1| hypothetical protein SPAB\_00492 [Salmonella  
enterica subsp. enterica serovar Paratyphi B str. SPB7]

-----MQAE  
LQTALFQAFDTLNLQRVKTFVPPVTLVCG-LGALGACGQEAQARGVSHLFVMVDSFLHQA  
GMTAPLVRSLAMKGVAMTVWPCPPGEPICITDVCAAVAQLREAACDGVVAFGGGSVLDAAK  
AVALLVTNP--DQTL SAM----TERSTLRPRLPLIAVPTTAGTG-----  
---SETTNTVTIIDA VSGRKQVLAHASLMPDV-----AILDAAV  
TEGVPPNVTAMT-----GIDAL THAIEAYSAL-NAT  
PF-----TDSLAI GAIAMIGKSLPKAVG-----YGHDLAARE-----NMLLAS  
CMAGMAFSSAG-----LGLCHAMAHQPGAALHIP-----HGQA---NAMLLPTVMG  
FNRMVCRERFSQIGRA-----LTNKKSDDRDAIAAVSELIAEVG  
QSKRLADAGAKPEH---YSAWAQAAL E-DI-----CLRSNPRTATQAQIIDLYAAAG

>gi++|56412655|ref|YP\_149730.1| putative alcohol dehydrogenase [Salmonella enterica

subsp. enterica serovar Paratyphi A str. ATCC 9150]

-----MQAE  
LQTALFQAFDTLNLQRVKTFVPPVTLVCG-LGALGACGQEAQARGVSHLFVMVDSFLHQA  
GMTAPLARSLAMKGVAMTVWPCPPGEPICITDVCAAVAQLREAACDGVVAFGGGSVLDAAK  
AVALLVTNP--DQTL SAM----TERSTLRPRLPLIAVPTTAGTG-----  
---SETTNVTVIIDAVSGRKQVLAHASLMPDV-----AILDAAV  
TEGVPPNVTAMT-----GIDALTHAIEAYSAL-NAT  
PF-----TDSLAI GAIAMIGKSLPKAVG-----YGHDLAARE-----NMLLAS  
CMAGMAFSSAG-----LGLCHAMAHQPGAALHIP-----HGQA---NAMLLPTVMG  
FNRMVCRERFSQIGRA-----LTNKKSDDRDAIAAVSELIAEVG  
QSKRLADAGTKPEH---YSAWAQAAL E-DI-----CLRSNPRTATQAQIIDLYAAAG

>gi++|207857873|ref|YP\_002244524.1| putative alchoho] dehydrogenase [Salmonella  
enterica subsp. enterica serovar Enteritidis str. P125109]

-----MQAE  
LQTALFQAFDTLNLQRVKTFVPPVTLVCG-LGALGACGQEAQARGVSHLFVMVDSFLHQA  
GMTAPLARSLAMKGVAMTVWPCPPGEPICITDVCAAVAQLREAACDGVVAFGGGSVLDAAK  
AVALLVTNP--DQTL SAM----TERSTLRPRLPLIAVPTTAGTG-----  
---SETTNVTVIIDAVSGRKQVLAHASLMPDV-----AILDAAV  
TEGVPPNVTAMT-----GIDALTHAIEAYSAL-SAT  
PF-----TDSLAI GAIAMIGKSLPKAVG-----YGHDLAARE-----NMLLAS  
CMAGMAFSSAG-----LGLCHAMAHQPGAALHIP-----HGQA---NAMLLPTVMG  
FNRMVCRERFSQIGRA-----LTNKKSDDRDAIAAVSELIAEVG  
QSKRLADAGAKPEH---YSAWAQAAL E-DI-----CLRSNPRTATQAQIIDLYAAAG

>gi++|161502389|ref|YP\_001569501.1| hypothetical protein SARI\_00423 [Salmonella  
enterica subsp. arizonae serovar 62:z4,z23:--]

-----MQAE  
LQTALFQAFDTLNLQRVKTFVPPVTLVCG-LGALSACGQEAQSRGLSHLFVMVDSFLHQA  
GMTAPLARSLAMKGVAMTVWPCPPGEPICITDVCAAVAQLREAACDGVVAFGGGSVLDAAK  
AVALLVTNP--DQTL SAM----TERSTLRPRLPLIAVPTTAGTG-----  
---SETTNVTVIIDAASGRKQVLAHASLMPDV-----AILDAAV  
TEGVPPNVTAMT-----GIDALTHAIEAYSAL-NAT  
PF-----TDSLAI GAIAMIGKSLPKAVG-----YGHDLTARE-----NMLLAS  
CMAGMAFSSAG-----LGLCHAMAHQPGAALHIP-----HGLA---NAMLLPTVMG  
FNRMVCRERFSQIGRA-----LTNKKSDDRDAIAAVSELIAEVG  
QSKRLADAGARPEH---YSAWAQAAQD-DI-----CMRTNPRTASQVQIIELYVAAQ

>gi++|218559389|ref|YP\_002392302.1| putative alchoho] dehydrogenase in ethanolamine  
utilization; ethanolaminosome [Escherichia coli s88]

-----MQSE  
LQTALFQAFDTLNLQRVKTFVPPVTLVCG-PGAVSSCGQQAQTRGLKHLFVMADSFHLHQA  
GMTAGLTRSLAVKGIAMTLWPCPVGEPICITDVCAAVAQLRESGCDGVIAFGGGSVLDAAK  
AVALLVTNP--DSTLAEM----SETSVLQPRPLIAIPTTAGTG-----  
---SETTNVTVIIDAVSGRKQVLAHASLMPDV-----AILDAAL  
TEGVPSHVTAMT-----GIDALTHAIEAYSAL-NAT  
PF-----TDSLAI GAIAMIGKSLPKAVG-----YGHDLAARE-----SMLLAS  
CMAGMAFSSAG-----LGLCHAMAHQPGAALHIP-----HGLA---NAMLLPTVME  
FNRMVCRDRFSQIGRA-----LRTKKSDDRDAINAVSELIAEVG  
IGKRLGDVGATSAH---YGAWAQAAL E-DI-----CLRSNPRTASLEQIVGLYAAAQ

SupplementalMultipleSequenceAlign.txt

>gi++|74312978|ref|YP\_311397.1| hypothetical protein sSON\_2533 [Shigella sonnei Ss046]

-----MGERKRRGYMQNE  
LQTALFQAFDTLNLQRVKTFVPPVTLVCG-PGSVSSCGQQAQTRGLKHLFVMADSFHLQA  
GMTAGLTRSLAVKGIAMTLWPCVGEPCITDVCAAVAQLRESGCDGVIAFGGGSVLDAAK  
AVALLVTNP--DSTLAEM----SETSVLQPRPLIAIPTTAGTG-----  
---SETTNVTVIIDAVSGRKQVLAHASLMPDV-----AILDAAL  
TEGVPSHVTAMT-----GIDALTHAIEAYSAL-NAT  
PF-----TDSLAIIGAIAMIGKSLPKAVG-----YGHDLAARE-----SMLLAS  
CMAGMAFSSAG-----LGLCHAMAHQPGAALHIP-----HGLA---NAMLLPTVME  
FNRMVCRERFSQIGRA-----LRTKKSDDRDAINAVSELIAEVG  
IGKRLGDVGATSAH----YGAWAQAAL-DE-----CLRSNPRTASLEQIVGLYAAAQ

>gi++|26248820|ref|NP\_754860.1| ethanolamine utilization protein eutG [Escherichia coli CFT073]

-----MGERKRRGSMQSE  
LQTALFQAFDTLNLQRVKTFVPPVTLVCG-PGAVSSCGQQAQTRGLKHLFVMADSFHLQA  
GMTAGLTRSLAVKGIAMTLWPCVGEPCITDVCAAVAQLRESGCDGVIAFGGGSVLDAAK  
AVALLVTNP--DSTLAEM----SETSVLQPRPLIAIPTTAGTG-----  
---SETTNVTVIIDAVSGRKQVLAHASLMPDV-----AILDAAL  
TEGVPSHVTAMT-----GIDALTHAIEAYSAL-NAT  
PF-----TDSLAIIGAIAMIGKSLPKAVG-----YGHDLAARE-----SMLLAS  
CMAGMAFSSAG-----LGLCHAMAHQPGAALHIP-----HGLA---NAMLLPTVME  
FNRMVCRDRFSQIGRA-----L--RTKKSDDRDA----INAVSELIAEVG  
IGKRLGDVGATSAH----YGAWAQAAL-DE-----CLRSNPRTASLEQIVGLYAAAQ

>gi++|157161912|ref|YP\_001459230.1| ethanolamine utilization protein eutG [Escherichia coli HS]

-----MQNE  
LQTALFQAFDTLNLQRVKTFVPPVTLVCG-PGAVSSCGQQAQTRGLKHLFVMADSFHLQA  
GMTAGLTRSLAVKGIAMTLWPCVGEPCITDVCAAVAQLRESGCDGVIAFGGGSVLDAAK  
AVALLVTNP--DSTLAEM----SETSVLQPRPLIAIPTTAGTG-----  
---SETTNVTVIIDAVSGRKQVLAHASLMPDV-----AILDAAL  
TEGVPSHVTAMT-----GIDALTHAIEAYSAL-NAT  
PF-----TDSLAIIGAIAMIGKSLPKAVG-----YGHDLAARE-----SMLLAS  
CMAGMAFSSAG-----LGLCHAMAHQPGAALHIP-----HGLA---NAMLLPTVME  
FNRMVCRERFSQIGRA-----LRTKKSD-----DRDAINAVSELIAEVG  
IGKRLGDVGATSAH----YGAWAQAAL-DE-----CLRSNPRTASLEQIVGLYAAAQ

>gi++|38704087|ref|NP\_311342.2| hypothetical protein ECs3315 [Escherichia coli O157:H7 str. Sakai]

-----MQNE  
LQTALFQAFDTLNLQRVKTFVPPVTLVCG-PGSVSSCGQQAQTRGLKHLFVMADSFHLQA  
GMTAGLTRSLAVKGIAMTLWPCVGEPCITDVCAAVAQLRESGCDGVIAFGGGSVLDAAK  
AVALLVTNP--DSTLAEM----SETSVLQPRPLIAIPTTAGTG-----  
---SETTNVTVIIDAVSGRKQVLAHASLMPDV-----AILDAAL  
TEGVPSHVTAMT-----GIDALTHAIEAYSAL-NAT  
PF-----TDSLAIIGAIAMIGKSLPKAVG-----YGHDLAARE-----SMLLAS  
CMAGMAFSSAG-----LGLCHAMAHQPGAALHIP-----HGLA---NAMLLPTVME  
FNRMVCRERFSQIGRA-----LRTKKSD-----DRDAINAVSELIAEVG  
IGKRLGDVGATSAH----YGAWAQAAL-DE-----CLRSNPRTASLEQLVGLYAAAQ

SupplementalMultipleSequenceAlign.txt

>gi++|15802975|ref|NP\_289005.1| iron-containing alcohol dehydrogenase [Escherichia coli O157:H7 EDL933]

-----MGERKRRGYMQNE  
LQTALFQAFDTLNLQRVKTFVPPVTL CG-PGSVSSCGQQAQTRGLKHLFVMADSFHLHQA  
GMTAGLTRSLAVKGIAMTLWPCVGEPCITDVCAAVAQLRESGCDGVIAFGGGSVLDAAK  
AVALLVTNP--DSTLAEM----SETSVLQPRPLIAIPTTAGTG-----  
---SETTNVTVIIDAVSGRKQVLAHASLMPDV-----AILDAAL  
TEGVPSHVTAMT-----GIDALTHAIEAYSAL-NAT  
PF-----TDSLAI GAIAMIGKSLPKAVG-----YGHDLAARE-----SMLLAS  
CMAGMAFSSAG-----LGLCHAMAHQPGAALHIP-----HGLA---NAMLLPTVME  
FNRMVCRERFSQIGRA-----L--RTKKSDDRDA-----INAVSELIAEVG  
IGKRLGDVGATSAH----YGAWAQAAL E-DI-----CLRSNPRTASLEQLVGLYAAAQ

>gi++|218700909|ref|YP\_002408538.1| putative alcohol dehydrogenase in ethanolamine utilization; ethanolaminosome [Escherichia coli IAI39]

-----MQNE  
LQTALFQAFDTLNLQRVKTFVPPVTL CG-LGAVSSCGQQAQSRGLKHLFVMADSFHLHQA  
GMTAGLTRSLAVKGIAMTLWPCVGEPCITDVCAAVAQLRESGCDGVIAFGGGSVLDAAK  
AVALLVTNP--DSTLAEM----SETSVLQPRPLIAIPTTAGTG-----  
---SETTNVTVIIDAVSGRKQVLAHASLMPDV-----AILDAAL  
TEGVPSHVTAMT-----GIDALTHAIEAYSAL-NAT  
PF-----TDSLAI GAIAMIGKSLPKAVG-----YGHDLAARE-----SMLLAS  
CMAGMAFSSAG-----LGLCHAMAHQPGAALHIP-----HGLA---NAMLLPTVME  
FNRMVCRDRFSQIGRA-----LRTKKSD-----DRDAINAVSELIAEVG  
IGKRLGDVGATSVH----YGAWAQAAL E-DI-----CLRSNPRTASLEQIVGLYAAAQ

>gi++|215487754|ref|YP\_002330185.1| predicted alcohol dehydrogenase in ethanolamine utilization [Escherichia coli O127:H6 str. E2348/69]

-----MQSE  
LQTALFQAFDTLNLQRVKTFVPPVTL CG-PGAVSSCGQQAQTRGLKHLFVMADSFHLHQA  
GMTAGLTRSLAVKGIAMTLWPCVGEPCITDVCAAVAQLRESGCDGVIAFGGGSVLDAAK  
AVALLVTNP--DSTLAEM----SETSVLQPRPLIAIPTTAGTG-----  
---SETTNVTVIIDAVSGRKQVLAHASLMPDV-----AILDAVL  
TEGVPSHVTAMT-----GIDALTHAIEAYSAL-NAT  
PF-----TDSLAI GAIAMIGKSLPKAVG-----YGHDLAARE-----SMLLAS  
CMAGMAFSSAG-----LGLCHAMAHQPGAALHIP-----HGLA---NAMLLPTVME  
FNRMVCRDRFSQIGRA-----LRTKKSD-----DRDAINAVSELIAEVG  
IGKRLGDVGATSAH----YGAWAQAAL E-DI-----CLRSNPRTASLEQIVGLYAAAQ

>gi++|89109258|ref|AP\_003038.1| predicted alcohol dehydrogenase in ethanolamine utilization [Escherichia coli str. K-12 substr. w3110]

-----MQNE  
LQTALFQAFDTLNLQRVKTFVPPVTL CG-PGSVSSCGQQAQTRGLKHLFVMADSFHLHQA  
GMTAGLTRSLTVKGIAMTLWPCVGEPCITDVCAAVAQLRESGCDGVIAFGGGSVLDAAK  
AVTLLVTNP--DSTLAEM----SETSVLQPRPLIAIPTTAGTG-----  
---SETTNVTVIIDAVSGRKQVLAHASLMPDV-----AILDAAL  
TEGVPSHVTAMT-----GIDALTHAIEAYSAL-NAT  
PF-----TDSLAI GAIAMIGKSLPKAVG-----YGHDLAARE-----SMLLAS  
CMAGMAFSSAG-----LGLCHAMAHQPGAALHIP-----HGLA---NAMLLPTVME  
FNRMVCRERFSQIGRA-----LRTKKSD-----DRDAINAVSELIAEVG

SupplementalMultipleSequenceAlign.txt

IGKRLGDVGATSAH----YGAWAQAALD-DI-----CLRSNPRTASLEQIVGLYAAAQ

>gi++|110642625|ref|YP\_670355.1| ethanolamine utilization protein EutG [Escherichia coli 536]

-----MQSE  
LQTALFQAFDTLNLQRVKTFVPPVTLVCG-PGAVSSCGQQAQTRGLKHLFVMADSFHLHQA  
GMTAGLTRSLAVKGIAMTLWPCVGEPCITDVCAAVAQLRESGCDGVIAFGGGSVLDAAK  
AVALLVTNP--DSTLAEM----SETSVLQPRPLIAIPTTAGTG-----  
---SETTNTVTIIDA VSGRKQVLAHASLMPDV-----AILDAAL  
TEGVPSHVTAMT-----GIDALTHAIEAYSAL-NAT  
PF-----TDSLAIGAIAMIGKSLPKAVG-----YGHDLVARE-----SMLLAS  
CMAGMAFSSAG-----LGLCHAMAHQPGAALHIP-----HGLA---NAMLLPTVME  
FNRMVCRERFSQVGRA-----LRTKKSD-----DRDAINAVSELIAEVG  
IGKRMGDVGATSAH----YGAWAQAALD-DI-----CLRSNPRTASLEQIVGLYAAAQ

>gi++|218690579|ref|YP\_002398791.1| putative alcohol dehydrogenase in ethanolamine utilization; ethanolaminosome [Escherichia coli ED1a]

-----MQSE  
LQTALFQAFDTLNLQRVKTFVPPVTLVCG-PGTVSSCGQQAQTRGLKHLFVMADSFHLHQA  
GMTAGLTRSLAVKGIAMTLWPCVGEPCITDVCAAVAQLRESGCDGVIAFGGGSVLDAAK  
AVALLVTNP--DSTLAEM----SETSVLQPRPLIAIPTTAGTG-----  
---SETTNTVTIIDA VSGRKQVLAHASLMPDV-----AILDAVL  
TEGVPSHVTAMT-----GIDALTHAIEAYSAL-NAT  
PF-----TDSLAIGAIAMIGKSLPKAVG-----YGHDLAARE-----SMLLAS  
CMAGMAFSSAG-----LGLCHAMAHQPGAALHIP-----HGLA---NAMLLPTVME  
FNRMVCRDRFSQIGRA-----LRTKKSD-----DRDAINAVSELIAEVG  
INKRLADVGATTGH----YGAWAQAALD-DI-----CLRSNPRTASLEQIVGLYAAAQ

>gi++|218696079|ref|YP\_002403746.1| putative alcohol dehydrogenase in ethanolamine utilization; ethanolaminosome [Escherichia coli 55989]

-----MQNE  
LQTALFQAFDTLNLQRVKTFVPPVTLVCG-PGSVSSCGQQAQTRGLKHLFVMADSFHLHQA  
GMTAGLTRSLAVKGIAMTLWPCVGEPCITDVCAAVAQLRESGCDGVIAFGGGSVLDAAK  
AVALLVTNP--DSTLAEM----SETSVLQPRPLIAIPTTAGTG-----  
---SETTNTVTIIDA VSGRKQVLAHASLMPDV-----AILDAAL  
TEGVPSHVTAMT-----GIDALTHAIEAYSAL-NAT  
PF-----TDSLAIGAIAMIGKSLPKAVG-----YGHDLAARE-----SMLLAS  
CMAGMAFSSAG-----LGLCHAMAHQPGAALHIP-----HGLA---NAMLLPTVME  
FNRMVCRERFSQIGRA-----LRTKKSDDRDAINAVSELIAEVG  
IGKRLGDVGATSAH----YGAWAQAALD-DI-----CLRSNPRTASLEQIVGLYAAAQ

>gi++|170681253|ref|YP\_001744635.1| ethanolamine utilization protein EutG [Escherichia coli SMS-3-5]

-----MQNE  
LQTALFQAFDTLNLQRVKTFVPPVTLVCG-PGAVSSCGQQAQTRGLKHLFVMADSFHLHQA  
GMTAGLTRSLAVKGIAMTLWPCVGEPCITDVCAAVAQLRESGCDGVIAFGGGSVLDAAK  
AVALLVTNP--DSTLAEM----SETSVLQPRPLIAIPTTAGTG-----  
---SETTNTVTIIDA VSGRKQVLAHASLMPDV-----AILDAAL  
TEGVPSHVTAMT-----GIDALTHAIEAYSAL-NAT  
PF-----TDSLAIGAIAMIGKSLPKAVG-----YGHDLAARE-----SMLLAS  
CMAGMAFSSAG-----LGLCHAMAHQPGAALHIP-----HGLA---NAMLLPTVME

SupplementalMultipleSequenceAlign.txt

FNRMVCRRERFSQIGRA-----LRTKKSD-----DRDAINAVSELIAEVG  
IGKRLGDIGATSAH----YGAWAQAALD-DI-----CLRSNPRTASLEQIIGLYAAAQ

>gi++|218548114|ref|YP\_002381905.1| putative alcohol dehydrogenase in ethanolamine utilization; ethanolaminosome [Escherichia fergusonii ATCC 35469]

-----MQNE  
LQTALFQAFDTLNLQRVKTFVPPVTLVCG-PGAVSSCGQQAQTRGLKHLFVMADSFHLHQA  
GMTAGLTRSLAVKGIAMTLWPCVGEPCITDVCAAVAQLRESGCDGVIAFGGGSVLDAAK  
AVALLVTNP--DSTLAEM----SETSVLQPRPLIAIPTTAGTG-----  
---SETTNTVTIIDAIVSGRKQVLAHASLMPDV-----AILDAAL  
TEGVPSHVTAMT-----GIDALTHAIEAYSAL-NAT  
PF-----TDSLAIIGAIAMIGKSLPKAVG-----YGHDLAARE-----SMLLAS  
CMAGMAFSSAG-----LGLCHAMAHQPGAALHIP-----HGLA---NAMLLPTVME  
FNRMVCRRERFSQIGRA-----LRTKKSD-----DRDAINAVSELIAEVG  
IGKRLGDVIGATSAH----YGAWAQAALD-DI-----CLRSNPRTASLEQIVGLYAAAQ

>gi++|209919925|ref|YP\_002294009.1| ethanolamine utilization protein EutG [Escherichia coli SE11]

-----MQNE  
LQTALFQAFDTLNLQRVKTFVPPVTLVCG-PGSVSSCGQQAQTRGLKHLFVMADSFHLHQA  
GMTAGLTRSLAVKGIAMTLWPCVGEPCITDVCAAVAQLRESGCDGVIAFGGGSVLDAAK  
AVALLVTNP--DSTLAEM----SETSVLQPRPLIAIPTTAGTG-----  
---SETTNTVTIIDTVSGRKQVLAHASLMPDV-----AILDAAL  
TEGVPSHVTAMT-----GIDALTHAIEAYSAL-NAT  
PF-----TDSLAIIGAIAMIGKSLPKAVG-----YGHDLAARE-----SMLLAS  
CMAGMAFSSAG-----LGLCHAMAHQPGAALHIP-----HGLA---NAMLLPTVME  
FNRMVCRRERFSQIGRA-----L---RTKKSDDRDA-----INAVSELIAEVG  
IGKRLGDVIGATSAH----YGAWAQAALD-DI-----CLRSNPRTASLEQIVGLYAAAQ

>gi++|218554976|ref|YP\_002387889.1| putative alcohol dehydrogenase in ethanolamine utilization; ethanolaminosome [Escherichia coli IAI1]

-----MQNE  
LQTALFQAFDTLNLQRVKTFVPPVTLVCG-PGSVSSCGQQAQTRGLKHLFVMADSFHLHQA  
GMTAGLTRSLAVKGIAMTLWPCVGEPCITDVCAAVAQLRESGCDGVIAFGGGSVLDAAK  
AVALLVTNP--DSTLAEM----SETSVLQPRPLIAIPTTAGTG-----  
---SETTNTVTIIDAIVSGRKQVLAHASLMPDV-----AILDAAL  
TEGVPSHVTAMT-----GIDALTHAIEAYSAL-NAT  
PF-----TDSLAIIGAIAMIGKSLPKAVG-----YGHDLAARE-----SMLLAS  
CMAGMAFSSAG-----LGLCHAMAHQPGAALHIP-----HGLA---NAMLLPTVME  
FNRMVCRRERFSQIGRA-----LRTKKSD-----DHDINAVSELIAEVG  
IGKRLGDVIGATSAH----YGAWAQAALD-DI-----CLRSNPRTASLEQIVGLYAAAQ

>gi++|218705951|ref|YP\_002413470.1| putative alcohol dehydrogenase in ethanolamine utilization; ethanolaminosome [Escherichia coli UMN026]

-----MQNE  
LQAALFQAFDTLNLQRVKTFVPPVTLVCG-PGAVSSCGQQAQTRGLKHLFVMADSFHLHQA  
GMTAGLTRSLAVKGIAMTLWPCVGEPCITDVCAAVAQLRESGCEGVIAFGGGSVLDAAK  
AVALLVTNP--DSTLAEM----SETSVLQPRPLIAIPTTAGTG-----  
---SETTNTVTIIDAIVSERKQVLVHASLMPDV-----AILDAAL  
TEGVPSHVTAMT-----GIDALTHAIEAYSAL-NAT  
PF-----TDSLAIIGAIAMIGKSLPKAVG-----YGHDLAARE-----SMLLAS



SupplementalMultipleSequenceAlign.txt

CMAGMAFSSAG-----LGLCHAMAHQPGAALHIP-----HGLA---NAMLLPTVME  
FNRMVCRRERFSQIGRA-----LRTKKSD-----DRDAINAVSELIAEVG  
INKRLADVGATTGH----YGAWAQAALDI-----CLRSNPRTASLEQIVGLYAAAQ

>gi++|187732023|ref|YP\_001881244.1| ethanolamine utilization protein EutG [Shigella boydii CDC 3083-94]

-----MQNE  
LQTALFQAFDTLNLQRVKTFVPPVTLGCG-PGSVSSCGQQAQTRGLKHLFVMADSFLHQA  
GMTAGLTRSLAVKGIAMTLWPCVPGEPITDVCAAVAQLRESGCDGVIAFGGGSVLDAAK  
AVALLVTNP--DSTLAEM----SETSVLQPRPLIAIPTTAGTG-----  
---SETTNTVTIIDAIVSGRKQVLAHASLMPDV-----AILDAAL  
TEDVPSHVTAMT-----GIDALTHAIEAYSAL-NAI  
PL-----TDSLAIIGAIAMIGKSLPKAVG-----YGHDLAARE-----SMLLAS  
CMAGMAFSSAG-----LGLCHAMAHQPGAALHIP-----HGLA---NAMLLPTVME  
FNRMVCRRERFSQIGRA-----LRTKKSD-----DRDAINAVSELIAEVG  
IGKRLGDVGATSAH----YGAWAQAALDI-----CLRSNPRTASLEQIVGLYAAAQ

>gi++|157154795|ref|YP\_001463773.1| ethanolamine utilization protein EutG [Escherichia coli E24377A]

-----MQNE  
LQTALFQAFDTLNLQRVKTFVPPVTLGCG-PGSVSSCGQQAQTRGLKHLFVMADSFLHQA  
GMTAGLTRSLAVKGIAMTLWPCVPGEPSITDVCAAVAQLRESGCDGVIAFGGGSVLDAAK  
AVALLVTNP--DSTLAEM----SETSVLQSRPLIAIPTTAGTG-----  
---SETTNTVTIIDAIVSGRKQVLAHASLMPDV-----AILDAAL  
TEGVPSHVTAMT-----GIDALTHAIEAYSAL-NAT  
PF-----TDSLAIIGAIAMIGKSLPKAVG-----YGHDLAARE-----SMLLAS  
CMAGMAFSSAG-----LGLCHAMAHQPGAALHIP-----HGLA---NAMLLPTVME  
FNRMVCRRERFSQIGRA-----LRTKKSD-----DRDAINAVSELIAEVG  
IGKRLGDVGATSAH----YGAWAQAALDI-----CLRSNPRTASLEQIVGLYAAAQ

>gi++|206578622|ref|YP\_002237210.1| ethanolamine utilization protein EutG [Klebsiella pneumoniae 342]

-----MQAE  
LQTALFHAFDTLNLQVKSFNVPVTLHG-VGALAACGPQAQARGLKHLFVMVDRFLHQA  
GMTAGLERSLAMKGVAMTLWPCPAGEPCVTDVCAAVAKLRDARCDGVVAFGGGSVLDAAK  
AVALLVANP--EQLGEM----TEHSELQPRPLIAVPTTAGTG-----  
---SETTNTVTIIDAIVSGRKQVLAHASLMPDV-----AILDAAL  
TEGVPPSVTAMT-----GIDALTHAVEAYSAR-HAT  
PF-----TDSLAMGAIAMIGEALPKAVG-----CGQDLAARE-----NMLLAS  
CMAGMAFSSAG-----LGLCHAMAHQPGAALHIP-----HGLA---NAMLLPTVMG  
FNRMVCRRGRFSQIGRA-----LTGRKTDDL----EAIGAVRELIAEVG  
LTMRLSDAGATPAH----YATWAQAALDI-----CLRTNPRTATREQUIEELYAAAQ

>gi++|152971318|ref|YP\_001336427.1| ethanolamine utilization enzyme [Klebsiella pneumoniae subsp. pneumoniae MGH 78578]

-----MQAE  
LQTALFHAFDTLNLQVMKSFNVPVTLHG-VGALAACGPQAQSRGLRHLFVMVDSFLHQA  
GMTAGLERSLAMKGIAMTLWPCPAGEPCVTDVCAAVAQLRDARCDGVVAFGGGSVLDAAK  
AVALLVANP--EQLGEM----TEHSELRPRPLIAVPTTAGTG-----  
---SETTNTVTIIDAIVSGRKQVLAHASLMPDV-----AILDAAL  
TEGVPPHITAMT-----GIDALTHAVEAYSAR-HAT

SupplementalMultipleSequenceAlign.txt

PF-----TDSLAMGAIAMIGEALPKAVG-----CGQDLAARE-----NMLLAS  
CMAGMAFSSAG-----LGLCHAMAHQPGAALHIP-----HGLA---NAMLLPTVME  
FNRMVRRARFSQIGRA-----LTGKKT-----DREAIAAVRELIAEVG  
LTMLTEAGATSAH-----YAAWAQAAQE-DI-----CLRANPRTASREQUIEELYAAAR

>gi++|120554163|ref|YP\_958514.1| iron-containing alcohol dehydrogenase [Marinobacter aquaeolei VT8]

-----MTTPGQSPDNAL  
IESIVTHTVDELAPRGLFNFNAPRQTLMG-EGAILKIGEMLGHLGVTHVLVADRUVVYEK  
GLMRSMERSLERAGIEFTIYPAITQEPDESUVTSATELLTRNQADFVLGFGGGSALDAAK  
VIALAGSCQ--SSLQQLA---EPGFGGRRVIGLGAVPTTAGTG-----  
---SEVTDISVIMRADRKHKYVIKQVDLMPDL-----AIVDPGL  
MLNLPPLVTAAT-----GIDALTHAIEAYAAR--SSH  
PL-----AKALAIQAVQSIQAEALPVVVG-----NGGDVAARL-----TMATAA  
YKAGLAFNSNG-----LGLVHAISHQIGARYRLA-----HGIA---NGILLPYVMR  
FNALVCQQEYAAIAHM-----LGVTRTGMTQREQ-CMASIDAVRQLLSDVG  
LPGSLAGTNIHRDD---FAAIAADALE-DV-----CIRDNPRDVTEADIVQLLEEV  
STK-----

>gi++|220904637|ref|YP\_002479949.1| iron-containing alcohol dehydrogenase [Desulfovibrio desulfuricans subsp. desulfuricans str. ATCC 27774]

-----MTQFYGKTKICYG-PYAL-----ETLESFPASHAFVVTDPFMVKS  
GFADQAVSHLKRKGIGFSIFSGVEPDPTLQAVVEATGHFLRSKADMILALGGGSAIDMAK  
AISYF-----GHKAARDRKAMLVAIPTTSGTG-----  
---SEVTSIAVITDKVNAVKIPLNDELLIPDA-----AILDARF  
TRTVPPHVTAST-----GMDVLTHAVEAYTSR-HSN  
VF-----TAIYAERAIRNVFTYLHRAYE-----QGDDMVARD-----NMLIGS  
CMAGLAFTNSG-----LGITHSMAHSLGGQFHIP-----HGLA---NAVLLPIVID  
FNSFDAGVKYREIAEM-----AGL--PAATVEEG-TRNLVAVRDLNASLG  
IPARVRELKVDEGEYRRNLDAMATNALE-DI-----CTQSNPRMPSHDDIVSLFERVW

>gi++|83592266|ref|YP\_426018.1| Iron-containing alcohol dehydrogenase [Rhodospirillum rubrum ATCC 11170]

-----MTQTAFFIPSINLMG-AGCLATAVNTINERGFKRALIVTDAVLEKL  
GVAGKVTPELLDDHGVESIVFGGAQPNPTVSNVEAGLAILREAECDCVISLGGGSPHDCAK  
GIALCATNG--GVIGDYE---GVDKSAHPQLPLIAINTTAGTA-----  
---SEMTRFCIITDESRLVKMAIVDRHVTPIM-----SVNDPEL  
MIGKPAALTAAT-----GMDALTHAIEAYVSI-AAT  
PI-----TDACALKAVSIIARTLRAVA-----DGADIKARE-----AMSYAQ  
FLAGMAFNAS-----LGFVHAMAHQLGGFYDLP-----HGVC---NAVLLPHVAA  
FNASVAGARLKDVAEA-----MGVDIANLSDDQG-AEACIAAIRTAAADIG  
IPAGLTELGVKGDG---VPTLAINALK-DA-----CGLTNPRPATQAEIEAIFRAAA

>gi++|82544902|ref|YP\_408849.1| ethanolamine ammonia-lyase, heavy chain [Shigella boydii sb227]

-----MQNE  
LQTALFQAFDTLNLQRVKTFSVPPVTLGCG-PGSVSSCGQQAQTRGLKHLFVMADSFHLQA  
GMTAGLTRSLAVKGIAMTLWPCPVGEPICITDVCAAVAQLRESGCDGVIAFGGGSVLDAK  
AVALLVTNP--DSTLAEM-----SETSVLQPRPLIAYEDDCVTRLIQDDVNETAYNQIKN  
WSISELREY-VLSDETSVDIIAFTRKGLTSEVVAVAKICSNADLIYGAKKMPVIKKANT



SupplementalMultipleSequenceAlign.txt

---AEMTSNAVIIDSARKVKEVIIDPNIIPDI-----AVDDASV  
MLEIPASVTAAT-----GMDALTHAVEAYVSV-GAH  
PL-----TDANALEAIRLINVWLPKAVD-----DGHNLEARE-----QMAFGQ  
YLAGMAFNSAG-----LGLVHALAHQPGATHNLP-----HGVC---NAILLPIVEN  
FNRPNAVARFARIAQA-----MGVETRGMSDEVA-SQEAINAIRTLSKRVG  
IPEGFSKLGVTKEDE---IEGWLDKALA-DP-----CAPCNPRTASRDEVRELYLEAL  
-----

>gi|90423471|ref|YP\_531841.1| iron-containing alcohol dehydrogenase  
[Rhodopseudomonas palustris BisB18]  
-----  
-----  
-----

-----MTETTFIPSLNMMG-AGCLTGAVSSVSRYGFKRALIVTDQMLFKL  
GMADKLASQLEQQGIAASIFPGAQPNPTVGNVESGLAQLQADGCDVCVISLGGGSSHCAK  
GIALTATNG--GNIRDYE---GVDRSAKQPLPLIAINTTAGTA-----  
---SEMTRFCIITDEKRLVKMAIVDRNVTPLL-----SVNDPEL  
MLGKQPMLTAAT-----GMDALTHAIEAYVSV-AAT  
PI-----TDACALKAIAMIANLRTAVA-----EGSNLAARE-----AMAYAG  
FMAGMAFNNAS-----LGYVHAMAHQLGGFYDLP-----HGVC---NAVLLPHVEA  
FNAEVSAARLRDVAHA-----LGVDTNGMSDQQG-AEACIHAIQRLSTDIG  
IPTGLAQLGVKEED---IPTLAANALK-DA-----CGLTNPRRASQADIEAIFRVAA  
-----

>gi|197250003|ref|YP\_002148972.1| lactaldehyde reductase [Salmonella enterica subsp.  
enterica serovar Agona str. SL483]  
-----  
-----  
-----

-----MSFMLALPKISLHG-AGAIADMVNLVANKQWGKALIVTDGQLVKL  
GLLDLSLFSALDEHQMSYHLFDEVFPNPTEELVQKGFAYQTAECDYIIAFGGGSPIDTAK  
AVKILTANP--GPSTAYS---GVGKVKAGVPLVAINTTAGTA-----  
---AEMTSNAVIIDSARKVKEVIIDPNIIPDI-----AVDDASV  
MLEIPASVTAAT-----GMDALTHAVEAYVSV-GAH  
PL-----TDANALEAIRLINVWLPKAVD-----DGHNLEARE-----QMAFGQ  
YLAGMAFNSAG-----LGLVHALAHQPGATHNLP-----HGVC---NAILLPIVEN  
FNRPNAVARFARIAQA-----MGVETRGMSDEVA-SQEAINAIRTLSKRVG  
IPEGFSKLGVTKEDE---IEGWLDKALA-DP-----CAPCNPRTASRDEVRELYLEAL  
-----

>gi|206580570|ref|YP\_002241222.1| lactaldehyde reductase [Klebsiella pneumoniae 342]  
-----  
-----  
-----

-----MSFMLALPKISLHG-AGAIADMVNLVAGKQWGKALIVTDGQLVKL  
GLLDLSLFSALDKQOMAYQLFDGVYVNPTEALVQQGYAAYQAARCDYLI AFGGGSPIDTAK  
AIKILTANP--GPSTAYS---GVGKVKAGVPLVAINTTAGTA-----  
---AEMTSNAVIIDSERQVKEVIIDPNLIPDI-----AVDDASV  
MLDIPPAVTAAT-----GMDALTHAIEAFVSV-GAH  
PL-----TDANALEAIRLINLWLPKAVD-----DGHDLQARE-----QMAFGQ  
YLAGMAFNSAG-----LGLVHALAHQPGATHNLP-----HGVC---NAILLPIIEN  
FNRPNAVARFARVAQA-----MGVDTRGMNDEAA-SMEAINAIRTLSKRVG  
IPQGFSQLGVSKAD---MEGWLDKALA-DP-----CAPCNPRTASRDEVRELYLEAL  
-----

>gi|161617169|ref|YP\_001591134.1| hypothetical protein SPAB\_05010 [Salmonella  
enterica subsp. enterica serovar Paratyphi B str. SPB7]  
-----  
-----  
-----

-----MRLCLIRPTGRCAFYRRPDK  
RSAIGQQGIFLRRIVMSFMLALPKISLHG-AGAIADMVNLVANKQWGKALIVTDGQLVKL  
GLLDLSLFSALDEHQMSYHLFDEVFPNPTEELVQKGFAYQSAECDYIIAFGGGSPIDTAK  
AVKILTANP--GPSTAYS---GVGKVKAGVPLVAINTTAGTA-----

SupplementalMultipleSequenceAlign.txt

---AEMTSNAVIIDSARKVKEVIIDPNIIPDI-----AVDDASV  
MLEIPASVTAAT-----GMDALTHAVEAYVSV-GAH  
PL-----TDANALEAIRLINLWLPKAVD-----DGHNLEARE-----QMAFGQ  
YLAGMAFNSAG-----LGLVHALAHQPGATHNLP-----HGVC---NAILLPIVEN  
FNRPNAVARFARIAQA-----MGVETRGMSDEAA-SQEAINAIRTLSKRVG  
IPEGFSKLGVTKE-----IEGWLDKALA-DP-----CAPCNPRTASRDEVRLYLEAL

>gi|152972706|ref|YP\_001337852.1| putative alcohol dehydrogenase [Klebsiella pneumoniae subsp. pneumoniae MGH 78578]

-----MLALPKISLHG-AGAIGDMVKLVAGKQWGKALIVTDGQLVKL  
GLLDSLFAALDEQQMAYQLFDEVFPNPTEALVQGGYAAYQAARCDYLIAFGGGSPIDTAK  
AIKILTANP--GSSTAYS----GVGKVKVKNAGVPLVAINTTAGTA-----  
---AEMTSNAVIIDSERQVKEVIIDPNLIPDI-----AVDDASV  
MLDIPPAVTAAT-----GMDALTHAIEAFVSV-GAH  
PL-----TDANALEAIRLINLWLPKAVD-----DGHDLQARE-----QMAFGQ  
YLAGMAFNSAG-----LGLVHALAHQPGATHNLP-----HGVC---NAILLPIIEN  
FNRPNAVARFARVAQA-----MGVDTRGMSDEAA-SMEAINAIRTLSKRVG  
IPQGFSQLGVRKAD-----IEGWLDKALA-DP-----CAPCNPRTASRDEVRELYLEAL

>gi|146313706|ref|YP\_001178780.1| lactaldehyde reductase [Enterobacter sp. 638]

-----MSFMLALPKISLHG-AGAIGDMVNLVANKQWGKALIVTDGQLVKM  
GLLDSLFTALDAHQMSYHLFDDVFPNPTEALVQKGFAYQDADCDYLIAFGGGSPIDTAK  
AIKILTANP--GPSTAYS----GVGKVKNTGVPLVAINTTAGTA-----  
---AEMTSNAVIIDTARQVKEVIIDSNIIPDI-----AVDDASV  
MLDIPASVTAAT-----GMDALTHAIEAYVSV-GAH  
PL-----TDANALEAIRLIALWLPKAVD-----DGHNLHARE-----QMAFGQ  
YLAGMAFNSAG-----LGLVHALAHQPGATHNLP-----HGVC---NAILLPIIEN  
FNRPNAVARFALVAQA-----MGVETRGMSDDAA-SQSAIQAIRDLSTRVG  
IPSGFSQLGVTKAD-----IEGWLDKALA-DP-----CAPCNPRTASRDEVRELYLEAL

>gi|16767310|ref|NP\_462925.1| putative alcohol dehydrogenase [Salmonella typhimurium LT2]

-----MSFMLALPKISLHG-AGAIADMVNLVANKQWGKALIVTDGQLVKL  
GLLDSLFSALDEHQMSYHLFDEVFPNPTEELVQKGFAYQSAECDYIIAFGGGSPIDTAK  
AVKILTANP--GPSTAYS----GVGKVKVKNAGVPLVAINTTAGTA-----  
---AEMTSNAVIIDSARKVKEVIIDPNIIPDI-----AVDDASV  
MLEIPASVTAAT-----GMDALTHAVEAYVSV-GAH  
PL-----TDANALEAIRLINLWLPKAVD-----DGHNLEARE-----QMAFGQ  
YLAGMAFNSAG-----LGLVHALAHQPGATHNLP-----HGVC---NAILLPIVEN  
FNRPNAVARFARIAQA-----MGVETRGMSDEAA-SQEAINAIRTLSKRVG  
IPEGFSKLGVTKE-----IEGWLDKALA-DP-----CAPCNPRTASRDEVRLYLEAL

>gi|207859235|ref|YP\_002245886.1| alcohol dehydrogenase [Salmonella enterica subsp. enterica serovar Enteritidis str. P125109]

-----MSFMLALPKISLHG-AGAIADMVNLVANKQWGKALIVTDGQLVKQ  
GLLDSLFSALDEHQMSYHLFDEVFPNPTEELVQKGFAYQSAECDYIIAFGGGSPIDTAK  
AVKILTANP--GPSTAYS----GVGKVKVKNAGVPLVAINTTAGTA-----

SupplementalMultipleSequenceAlign.txt

---AEMTSNAVIIDSSRKVKEVIIDPNIIPDI-----AVDDASV  
MLEIPASVTAAT-----GMDALTHAVEAYVSV-GAH  
PL-----TDANALEAIRLINLWLPKAVD-----DGHNLEARE-----QMAFGQ  
YLAGMAFNSAG-----LGLVHALAHQPGATHNLP-----HGVC---NAILLPIVEN  
FNRPNVARFARIAQA-----MGVETRGMSDEAA-SQEAINAIRTLSKRVG  
IPEGFSKLGVTKE-----IEGWLDKALA-DP-----CAPCNPRTASRDEVRGLYLEAL

>gi|62182504|ref|YP\_218921.1| putative iron-containing alcohol dehydrogenase  
[Salmonella enterica subsp. enterica serovar Choleraesuis str. SC-B67]

-----MSFMLALPKISLHG-AGAIADMVNLVANKQWGKALIVTDGQLVKL  
GLLDLSLFSALDKHQMSYHLFDEVFPNPTEELVQKGFAYQSAECDYIIAFGGGSPIDTAK  
AVKILTANP--GPSTAYS---GVGKVKVKNAGVPLVAINTTAGTA-----  
---AEMTSNAVIIDSSARKVKEVIIDPNIIPDI-----AVDDASV  
MLEIPASVTAAT-----GMDALTHAVEAYVSV-GAH  
PL-----TDANALEAIRLINVWLPKAVD-----DGHNLEARE-----QMAFGQ  
YLAGMAFNSAG-----LGLVHALAHQPGATHNLP-----HGVC---NAILLPIVEN  
FNRPNNAVERFARIAQA-----MGVETRGMSDEAA-SQEAINAIRTLSKRVG  
IPEGFSKLGVTKE-----IEGWLDKALA-DP-----CAPCNARTASRDEVRGLYLEAL

>gi|77457538|ref|YP\_347043.1| Iron-containing alcohol dehydrogenase [Pseudomonas  
fluorescens Pf0-1]

-----MSSTFFIPAVNIMG-SGCLDEAMNAIRNYGFRKALIVTDAGLAKA  
GVATMIAEKLAMQDIDSVVFDGAKPNPSIANVEAGLALLKESRCDFVVSLLGGGSPHCAK  
GIALCATNG--GQIRDYE---GVDQSTKQPLPLIAINTTAGTA-----  
---SEMTRFCIITDETRHVKMAIVDRNVTPLL-----SVNDPAL  
MVAMPKSLTAAT-----GMDALTHAIEAYVST-AAN  
PI-----TDACALKAMT LISNNLRVVR-----DGSDLAARE-----NMAYAQ  
FLAGMAFNNAS-----LGYVHAMAHQLGGFYDLP-----HGVC---NAVLLPHVQT  
FNAQVCAGRLTDVAHA-----MGADIRGFSPEEG-AQAAIAAIRCLARDVE  
IPGGLRDLGAKCTD---IPVLAANALK-DA-----CGFTNPRVADQRQIEEIFRSAFE

>gi|161505445|ref|YP\_001572557.1| hypothetical protein SARI\_03603 [Salmonella  
enterica subsp. arizonae serovar 62:z4,z23:--]

-----MFMSFMLALPKISLHG-AGAIADMVNLVANKQWGKALIVTDSQLVKL  
GLLDNLFSALDAHNMHYHLFDKVFNPTEALVQKGYAAYQAEACDYIIAFGGGSPIDTAK  
AVKILTANP--GPSTAYS---GVGKVKVKNAGVPLVAINTTAGTA-----  
---AEMTSNAVIIDTERQVKEVIIDPNIIPDI-----AVDDASV  
MLEIPASVTAAT-----GMDALTHAVEAYVSV-GAH  
PL-----TDANALEAVRLINLWLPKAVD-----DGHNLEARE-----QMAFGQ  
YLAGMAFNSAG-----LGLVHALAHQPGATHNLP-----HGVC---NAILLPITEN  
FNRPNNAVARFARLAQA-----MGVDTRGMSDEAA-SQEAINAIRALS KRVG  
IPEGFSQLGVTKDD---IEGWLDKALA-DP-----CAPCNPRTASRDEVRELYLEAL

>gi|157371893|ref|YP\_001479882.1| iron-containing alcohol dehydrogenase [Serratia  
proteamaculans 568]

-----MAASTFFIPPVNMIG-SGCLDEAAKTMKQQLRHALIVTDKVLNNI  
GVVAQVQQLLAVQQIESCVYDGHNPPTTLNVKQGLALLQEHRCDVVSLLGGGSPHCAK

SupplementalMultipleSequenceAlign.txt

GIALVATNG--GEIKDYE----GVDRSAKPQLPMIAINTTAGTA-----  
---SEMTRFCIITDEARHIKMAIVDKHVTPIL-----SVNDPHL  
MAGMPKGLTAAT-----GMDALTHAIEAYVSS--AAN  
PI-----TDACALKAVTMIAESLRDAVA-----DGSNMQARE-----NMAYAQ  
FLAGMAFNNAS-----LGYVHAMAHQLGGFYDLP-----HGVC---NAVLLPHVQE  
FNARVCAPRLKDIAVA-----MGLDVKHLNDPQG-AAACIAAIRLLAKDVG  
IPAGLLDLKVKEQD----FDTLAANALK-DA-----CGFTNPIQATHEQIVAIIFRAAM

>gi|56478056|ref|YP\_159645.1| alcohol dehydrogenase II [Aromatoleum aromaticum EbN1]

-----MSTTTFFIPPVNLGM-AGCLADAMAARSYGFRHALIVTDAGLARA  
GVADKVAALLAEQDIQATVFDGAKPNPTVGNVEAGLALLRDKQCDCVISLGGGSPHDCAK  
GIALVATNG--GRIGDYE----GVDRSAKPQLPLVAINTTAGTA-----  
---SEMTRFCIITDEARHIKMAIVDRNVTPII-----SVNDPTL  
MVAKPAALTAAT-----GMDALTHAVEAYVST--AAT  
PI-----TDACALKAVTLIAANLRRAVA-----DGNLDLARE-----QMAYAQ  
FLAGMAFNNAS-----LGYVHAMAHQLGGFYDLP-----HGVC---NAVLLPHVEA  
FNASFSATRLADVARA-----MGADVLDLDDAAA-AEGCLAAIRRLAADVG  
IPAGLTQLGVKAED----IPTLAANALN-DA-----CGLTNPRPATQADIEAIFRGAL

>gi|52425857|ref|YP\_088994.1| EutG protein [Mannheimia succiniciproducens MBEL55E]

-----MGVVLMSYYFLPTRNVFG-ENAVEEVGELMRSLLGGRPLIVTDGFLAQS  
GMAEQLATILRGAGLEPIIFGGAEPNPTDKNVESGIAFYHDHNCDCIISLGGGSSHDCAK  
GIGLIASNG--GRIQDYE----GVDRSTNPMVPLMAVNNTTAGTA-----  
---SEITRFCIITDTARKVKMAIVDWRVTPQI-----AVNDPLL  
MKGMPAGLTAAT-----GMDALTHAIEAYVST--AAN  
PL-----TDAAALMAISMIQQYLPKAVA-----NGDYMKARD-----KMAYAQ  
YLAGIAFNNAS-----LGYVHAMAHQLGGFYNLP-----HGVC---NAILLPYVEE  
FNLIGNLNRFRDIANA-----MGENIQGLSTDDA-ALKAIAAIRRLSKQVG  
IPANLKELGVPED----FDVMAENAMK-DV-----CMLTNPRKATKQVIEIFQRAY  
DGN-----

>gi|197284552|ref|YP\_002150424.1| probable alcohol dehydrogenase [Proteus mirabilis HI4320]

-----MASSTFYIPSVNKLGM-AGCLADAINSMKDFGFHKALIVTDSVLNQL  
GVVNKVELLAKSGIASVTYDGTAPNPTVENVEAGLALLKEHQDCDCVISLGGGSPHDCAK  
GIALVAANG--GKIADYE----GVDRSEHPQLPLIAINTTAGTA-----  
---SEMTRFCIITDTARHIKMAIVDKNVTPII-----SVNDSEL  
MIGMPKGLTAAT-----GMDALTHAVEAYVST--AAN  
PI-----TDACALKAVTMISESLRKVVE-----NGGDTAARE-----NMAYAQ  
FLAGMAFNNAS-----LGYVHAMAHQLGGFYNLP-----HGVC---NAVLLPHVQA  
YNIQAAAGRLKDIQA-----MGVDVSAMNDEQG-AQACIEEIRKIAKQDVG  
IPAGLKELGVKEED----FKTLAENALK-DA-----CAITNPVQGSSESDVIEIFRQAM

>gi|117618598|ref|YP\_856001.1| 1,3-propanediol dehydrogenase [Aeromonas hydrophila subsp. hydrophila ATCC 7966]

-----MATFKFYIPAINLMG-AGCLQEAADIKGYGHRKALIVTDKILNQL  
GVVAKVAGLLAEHGIESAVFDETKPNPTMTNVEAGLAMLKANGCDCDCVISLGGGSPHDCAK  
GIALVAANG--GSIKDYE----GVDRSAKPQLPLIAINTTAGTA-----

SupplementalMultipleSequenceAlign.txt

---SEMTRFCIITDEARHVKMAIVDKHVTPLM-----SVNDPEL  
MLAKPAGLTAAT-----GMDALTHAIEAYVST-IAT  
PV-----TDASAIMAIQLIAKHLRTAVN-----QGDDLHARE-----QMAYAQ  
FLAGMAFNNAS-----LGYVHAMAHQLGGFYDLP-----HGVC---NAVLLPHVQA  
YNAQVCAARLKDVARH-----MGVDVSAMNDEQG-AAAAIAAIQQLAHDVK  
IPAGLEQLGVKADD----FNLLAENALK-DA-----CGFTNPKQASHAEIVAIIRAAM  
-----

>gi|51594736|ref|YP\_068927.1| alcohol dehydrogenase [Yersinia pseudotuberculosis IP 32953]

-----MSFMLALPKISLHG-TGAIGDMVKLLSDKQWGKALIVTDGQLVEL  
GLLDSLFAALAQYQLPYGLFGEVFPNPTEELVQAGFAAFTQHQCXYLIAFGGGSPIDTAK  
AIKILTANP--GPSTAYS----GVGKVKQTGVPLIAINTTAGTA-----  
---AELTSNAVIIDSQRQVKEVIIDTNLIPDI-----AVDDPSV  
MLNIPASVTAAT-----GMDALTHAIEAYVSL-GAH  
TL-----TDHSALESIRLISQWLPLAVA-----DGKNLQARE-----MMACGQ  
YLAGMAFNSAG-----LGLVHALAHQPGATHNLP-----HGVC---NAILLPVIEE  
YNRPQATRRFARIAQA-----MGVDTQDMSDEQA-SHQIAAIRQLSLQVG  
IPAGFSALGIEESD----IEGWLDKALA-DP-----CAPCNPRADREQIRTLYLQAL  
-----

>gi|170026061|ref|YP\_001722566.1| lactaldehyde reductase [Yersinia pseudotuberculosis YPIII]

-----MSFMLALPKISLHG-TGAIGDMVKLLSDKQWGKALIVTDGQLVEL  
GLLDSLFAALAQYQLPYGLFGEVFPNPTEELVQAGFAAFTQHQCXYLIAFGGGSPIDTAK  
AIKILTANP--GPSTAYS----GVGKVKQTGVPLIAINTTAGTA-----  
---AELTSNAVIIDSQRQVKEVIIDTNLIPDI-----AVDDPSV  
MLNIPASVTAAT-----GMDALTHAVEAYVSL-GAH  
TL-----TDHSALESIRLISQWLPLAVA-----DGKNLQARE-----MMACGQ  
YLAGMAFNSAG-----LGLVHALAHQPGATHNLP-----HGVC---NAILLPVIEE  
YNRPQATRRFARIAQA-----MGVDTQDMSDEQA-SHQIAAIRQLSLQVG  
IPAGFSALGIEESD----IEGWLDKALA-DP-----CAPCNPRADREQIRTLYLQAL  
-----

>gi|126452408|ref|YP\_001066362.1| EutG protein [Burkholderia pseudomallei 1106a]

-----MDRAFSFPGITGGSTRDA  
PTQPGDDMSNLSSAERTDSFFIPRVTLIG-PGCARETGARAKSLGAKKALIVTDAGLHKM  
GVSEIVAGHIREAGLQAAIFPGAQPNPTDVNVHDGVELYRREGCDFIVSLGGGSSHCAK  
GIGLVTAGG--GHIRDYE----GIDKSTVPMPLISINTTAGTA-----  
---AEMTRFCIITNSSNHVKMAIVDWRCTPLI-----AIDDP  
MVAMPALTAAT-----GMDALTHAVEAYVST-AAT  
PI-----TDACA EKAIALIGEWLPKAVA-----NGESMQARA-----AMCYAQ  
YLAGMAFNNAS-----LGYVHAMAHQLGGFYNLP-----HGVC---NAILLPVCE  
FNLIAAPERFAAIAPL-----LGVRTAGMSTPDA-ARAAIAAIRALSASIG  
IPSGLAALGVKAED----HEVMAGNAQK-DA-----CMLTNPRKATLAQVIAIFAAM  
-----

>gi|59711795|ref|YP\_204571.1| Fe-containing alcohol dehydrogenase [Vibrio fischeri ES114]

-----MSAFFIPTVNLGM-AGCLTEAMDSIKSQGYKKGLIVTDNVLVAI  
GMVKQVSDLLAERGVEVAVFDGTQPNPTIGNVNAAGLKILKDNECDFVISLGGGSPHCAK  
GIALVAANG--GEIADYE----GVDQSAKPQLPLIAINTTAGTA-----



SupplementalMultipleSequenceAlign.txt

---SEMTRFCIITDEARHIKMAIVDKHTTPLM-----SVNDPEL  
MLAKPASLTAAT-----GMDALTHAIEAYVSI-AAT  
PV-----TDAVAIKAMELIQHLRTAVN-----DGQNLEARE-----QMAYAQ  
FMAGMAFNNAS-----LGYVHAMAHQLGGFYDLP-----HGVC---NAILLPHVQS  
YNAKVCPERLKDVAKA-----MGVNVEGTMNEEG-AQAALAIKQLSQDVG  
IPSGLTELNAAKEED----FDTLAENALK-DA-----CGFTNPKQATHEEIVSIFKAAM  
-----

>gi|21228871|ref|NP\_634793.1| Iron-containing alcohol dehydrogenase [Methanosarcina mazei Go1]

-----MQSKTLLL LAGKKS VLLIFCIFI IAPGR  
FEQNL SRGVEGMIEKMTYTYL NPKIALMG-PGC VNGIGTHAKDLGGTKALIVSGKSRHGK  
ELAADIR RILERAGIEAAIFPGA DPNPTDTSVM EGADIYRKENCNMIVAVGGGSPMDCAK  
AIGIVVYNG--GRINDYE----GVGKVTRGIPPLITVNTTAGTA-----  
---SEM TSFTIITDTERHIKMAIVDPRITPDV-----AVNDPEL  
MVSMP PALTAAT-----GMDALTHAVEAYVST-MAT  
PT-----TDA AAIKAI ELISKYLPEAVL-----HGEDIRARD-----MMAHAE  
YLAGIAFNNAS-----LGYVHSM AHQLGGFYDLP-----HGVC---NAILLPVEM  
YNKQVCPERFADIKA-----MGEKVEGLSPDEA-ADKAIDA IKKLAAEIG  
IPSGL KELGAREED----LELLAENAMQ-DV-----CRLTNPRELSKEDIIEIYRKAL  
-----

>gi|22124498|ref|NP\_667921.1| oxidoreductase [Yersinia pestis KIM]

-----MSFMLALPKISLHG-TGAIGDMVKLLSDKQWGKALIVTDGQLVEL  
GLLDSLFAAMAQYQLPYGLFGEVFPNPTEELVQAGFAAFTQHQC DYLIAFGGGSPIDTAK  
AIKILTANP--GPSTAYS----GVGKVKQTGVPLIAINTTAGTA-----  
---AELTSNAVIIDSQRQVKEVIIDTNLIPDI-----AVDDPSV  
MLNIPASVTAAT-----GMDALTHAVEAYVSL-GAH  
TL-----TDHSALESIRLISQWLPLAVA-----DGKNLQARE-----MMACGQ  
YLAGMAFNSAG-----LGLVHALAHQPGATHNLP-----HGVC---NAILLPVIEE  
YNRPQATRRFARIAQA-----MGVDTQDMSDEQA-SHQAI AAIRQLSLQVG  
IPAGFSALGIEESD----IEGWLDKALA-DP-----CAPCNPRSADREQIRTLYLQAL  
-----

>gi|126439344|ref|YP\_001059078.1| EutG protein [Burkholderia pseudomallei 668]

-----MDRAFSFPGITGGSTRDA  
PTQPGDDMSNLSSAERTDSFFIPCVT LIG-PGCARETGARAKSLGAKKALIVTDAGLHKM  
GVSEIVAGHIREAGLQAAIFPGAQPNPTDVNVHDGV ELYRREGCDFIVSLGGGSSHDCAK  
GIGLVTAGG--GHIRDYE----GIDKSTVPMTPLISINTTAGTA-----  
---AEMTRFCIITNSSNHVKMAIVDWRCTPLI-----AIDDPSL  
MVAMP PALTAAT-----GMDALTHAVEAYVST-AAT  
PI-----TDACA EKAIALIGEWLPKAVA-----NGESMQARA-----AMCYAQ  
YLAGMAFNNAS-----LGYVHAMAHQLGGFYNLP-----HGVC---NAILLPHVCE  
FNLIAAPERFAAIAPL-----LGVRTAGMSTPDA-ARAAIAAIRALSASIG  
IPSGLAALGVKAED----HEVMAGNAQK-DA-----CMLTNPRKATLAQVIAIFAAM  
-----

>gi|76812055|ref|YP\_333632.1| EutG protein [Burkholderia pseudomallei 1710b]

-----MAAFGVGRNGAAQSAESDAVRFIGARPRAAPRG  
QRRASPGPRPIAPKWSRMCLIRTGVARRAAGRSSARGLPADGMDRAFSFPGITGGSTRDA  
PTQPGDDMSNLSSAERTDSFFIPCVT LIG-PGCARETGARAKSLGAKKALIVTDAGLHKM  
GVSEIVAGHIREAGLQAAIFPGAQPNPTDVNVHDGV ELYRREGCDFIVSLGGGSSHDCAK  
GIGLVTAGG--GHIRDYE----GIDKSTVPMTPLISINTTAGTA-----  
---AEMTRFCIITNSSNHVKMAIVDWRCTPLI-----AIDDPSL  
MVAMP PALTAAT-----GMDALTHAVEAYVST-AAT

SupplementalMultipleSequenceAlign.txt

PI-----TDACA EKAI ALIGEWLPKAVA-----NGESMQARA-----AMCYAQ  
YLAGMAFNNAS-----LGYVHAMAHQLGGFYNLP-----HGVC---NAILLPHVCE  
FNLIAAPERFAAIAPL-----LGVRTAGMSTPDA-ARAAIAAIRALSASIG  
IPSGLAALGVKAED---HEVMAGNAQK-DA-----CMLTNPRKATLAQVIAIFAAAM  
-----

>gi|28900421|ref|NP\_800076.1| alcohol dehydrogenase [Vibrio parahaemolyticus RIMD  
2210633]

-----  
-----  
-----  
-----  
-----MTSTFFIPTVNLGM-AGCLKDAANSIQSQGFKKGLIVTDKILNQI  
GVVKQVQDLLTERGVATVVFDTGTPNPTITNVNDGLALLKENECDFVISLGGGSPHCAK  
GIALVASNG--GKIGDYE---GVDQSAPKPLPLIAINTTAGTA-----  
---SEMTRFCIITDEERHIKMAIVDKHTTPLI-----SVNDPEL  
MLAKPASLTAAT-----GMDALTHAIEAYVSI-AAT  
PI-----TDAVAIKAEI LIQAHLRTAVK-----NGENLEARE-----QMAYA Q  
FMAGMAFNNAS-----LGYVHAMAHQLGGFYDLP-----HGVC---NAILLPHVQR  
YNAQVCPERLRDVAKA-----MGVDVEGMSAEHG-AAAAIDAIVALAKDVG  
IPAGIKELGAKLED---IPTLADNALK-DA-----CGFTNPKQATHEEISAI FEAM  
-----

>gi|197335936|ref|YP\_002155987.1| 1,3-propanedio l dehydrogenase [Vibrio fischeri  
MJ11]

-----  
-----  
-----  
-----  
-----MSAFFIPTVNLGM-AGCLTEAMDSIKSQGYKKGLIVTDNVLVAI  
GMVKQVSDLLSERGVEVAVFDGTQPNPTIGNVNAGLKILKDNECDFVISLGGGSPHCAK  
GIALVAANG--GEIADYE---GVDQSAPKPLPLIAINTTAGTA-----  
---SEMTRFCIITDEARHIKMAIVDKHTTPLM-----SVNDPEL  
MLAKPASLTAAT-----GMDALTHAIEAYVSI-AAT  
PV-----TDAVAIKAMELIQAHLRTAVN-----DGQNLEARE-----QMAYA Q  
FMAGMAFNNAS-----LGYVHAMAHQLGGFYDLP-----HGVC---NAILLPHVQS  
YNAKVC PERLKDVAKA-----MGVNVEG MTNEEG-AQAAL EAIKQLSQDVG  
IPSGLTE LNAKEED---FDTLAENALK-DA-----CGFTNPKQATHEEIVSIFKAAM  
-----

>gi|152978087|ref|YP\_001343716.1| iron-containing alcohol dehydrogenase  
[Actinobacillus succinogenes 130Z]

-----  
-----  
-----  
-----  
-----MSTYYFLPTRNVFG-ENAVEEVGTLMKSLGNNPLIVTDAFLAKN  
GMADQLAAVLSNAGLKPVIFGGAEPNPTDKNVEEGIVFYNEHGCD SIIISLGGGSSHCAK  
GIGLIASNG--GRIQDYE---GVDRSHNAMVPLMAVNTTAGTA-----  
---SEITRFCIITDTARKVKMAIVDWRTTQPI-----AVNDPLL  
MKGMPPSLTAAT-----GMDALTHAIEAYVST-AAN  
PL-----TDAALMAITMIQQYLPKAVA-----NGDYMKARD-----KMAYA Q  
YLAGIAFNNAS-----LGYVHAMAHQLGGFYNLP-----HGVC---NAILLPYVEE  
FNLIGNLNRFRDIKA-----MGENIDGLCTDDA-ALKAIGAIRRLSKQVG  
IPANLQLLGVKPED---FDVMAENAMK-DV-----CMLTNPRKATKQVIEIFQRAY  
DGD-----

>gi|56552492|ref|YP\_163331.1| alcohol dehydrogenase II [Zymomonas mobilis subsp.  
mobilis ZM4]

-----  
-----  
-----  
-----  
-----MASSTFYIPFVNEMG-EGSLEKAIKDLNGSGFKNALIVSDAFMNKS  
GVVKQVADLLKAQGINS AVYDGVMPNPTVTAVLEGLKILKDNN SDFVISLGGGSPHCAK  
AIALVATNG--GEVKDYE---GIDKSKPALPLMSINTTAGTA-----  
---SEMTRFCIITDEVRHVKMAIVDRHVTPMV-----SVNDPLL

SupplementalMultipleSequenceAlign.txt

MVGMPKGLTAAT-----GMDALTHAFEAYSST-AAT  
PI-----TDACALKAASMIKLNKTACD-----NGKDMPARE-----AMAYAQ  
FLAGMAFNNAS-----LGYVHAMAHQLGGYYNLP-----HGVC---NAVLLPHVLA  
YNASVVAGRLKDVGVA-----MGLDIANLGDKEG-AEATIQA VRDLAASIG  
IPANLTELGAKKED---VPLLADHALK-DA-----CALTNPRQGDQKEVEELFLSAF  
-----

>gi|83720772|ref|YP\_442856.1| alcohol dehydrogenase, iron-containing [Burkholderia thailandensis E264]

MIFTVIMQFGVIAVNGRIENFARRTSRPGNAGARVGRASGRKRCGSPAPPAPPAPPAPP  
SAPSRAPGRRRAARSASVMLVLFLRSVMRHANLNLYCAVLA AITSARRFAYRRAPTAKAR  
AVVSVAILPVC RHA AISSARAFASAAGRRGDSARLSGRGEDRQNRTPHGAARPASAALGD  
ARRRRRRRARS LRNGAACAEFEQAMRAIQSAVHESTAFSRDGTVRAFSPFGQTGDFTRDA  
LTQPGDDMSYLNIAQR TDSFFIPCVT LIG-PGCARETGVRAKSLGAKKALIVTDAGLHKM  
GLSEIVAGHIRDAGLQAVIFAGAEPNPTDVNVHDGVERFQREGCDFIVSLGGGSSHCAK  
GIGLVTAGG--GHIRDYE---GIDKSTVPMTPLISINTTAGTA-----  
---AEMTRFCIITNSSNHVKMAIVDWRCTPLI-----AIDDPCL  
MVAMPALTAAT-----GMDALTHAVEAYVST-AAT  
PI-----TDACA EKAIALIGEWLPKAVA-----NGESMEARA-----AMCYAQ  
YLAGMAFNNAS-----LGYVHAMAHQLGGFY NLP-----HGVC---NAILLPHVCE  
FNLIAAPERFATI ASL-----LGVNTAGSSTVDA-ARAAIAAIRGLSASIG  
IPAGLAALGVKAED---HEVMASNAQK-DA-----CMLTNPRKATLAQVIAIFAAAM  
-----

>gi|110807737|ref|YP\_691257.1| putative alcohol dehydrogenase [Shigella flexneri 5 str. 8401]

-----  
-----  
-----  
-----  
-----MASSTFFIPSVNVIG-ADSLTDAMNMMADYGFTRTLIVTDNMLTKL  
GMAGDVQKALEERNIFSVIYDGTQPNPTTENVAAGLKLLKENNCDSVISLGGGSPHCAK  
GIALVAANG--GDIRDYE---GVDRSAKPQLPMIAINTTAGTA-----  
---SEMTRFCIITDEARHNKMAIVDKHVTPLL-----SVNDSSL  
MIGMPKSLTAAT-----GMDALTHAIEAYVSI-AAT  
PI-----TDACALKAVTMIAENLPLAVE-----DGSNAKARE-----AMVY AQ  
FLAGMAFNNAS-----LGYVHAMAHQLGGFY NLP-----HGVC---NAVLLPHVQV  
FNSKVA AARLRDCAAA-----MGVNVVTGKNDAEG-AEACINAI RELAKKVD  
IPAGLRDLNVKEED---FAVLATNALK-DA-----CGFTNPIQATHEEIVVIYRAAM  
-----

>gi|87200808|ref|YP\_498065.1| iron-containing alcohol dehydrogenase [Novosphingobium aromaticivorans DSM 12444]

-----  
-----  
-----  
-----  
-----MAAINLPRVIRAG-GGALAE L PDAMAQCGLSRPFVVTDAFLVQS  
GMVARMLEVL D GAGIAATVFDATVPDPTVAVVEQALGALREAECD CVIGFGGSPIDTSK  
AIAALALEP--RAVQSMK---APATTDV PGLPII AVPTTAGTG-----  
---SEATKFTIVTDEATSEKMLCAGLAFLPTI-----AIVDFEL  
TMGKPARLTADT-----GIDSLTHAIEAYVSK-KAN  
PF-----SDAMAISAMKLIAPNIRTACA-----EPGNRAARE-----AMMIGA  
HHAGIAFSNAS-----VALVHGMSRPIGAFFHVP-----HGLS---NAMLLPAITA  
FSAPSALPRYADCARA-----MGVALESEGDQSA-VARLLDELAALNADLS  
VPTP-QSHGISADRWFEVVP EMARQAIA-SG-----SPGNNPRVPDAAEIERLYAEVF  
G-----

>gi|15804130|ref|NP\_290169.1| putative alcohol dehydrogenase [Escherichia coli O157:H7 EDL933]

-----  
-----  
-----  
-----  
-----MASSTFFIPSVNVIG-ADSLTDAMNMMADYGFTRTLIVTDSMLTKL  
GMAGDVQKALEERNIFSVIYDGTQPNPTTENVAAGLKLLKENNCDSVISLGGGSPHCAK  
GIALVAANG--GDIRDYE---GVDRSAKPQLPMIAINTTAGTA-----

SupplementalMultipleSequenceAlign.txt

---SEMTRFCIITDEARHIKMAIVDKHVTPLL-----SVNDSSL  
MIGMPKSLTAAT-----GMDALTHAIEAYVSI-AAT  
PI-----TDACALKAVTMIAENLPLAVE-----DGSNAKARE-----AMAYAQ  
FLAGMAFNNAS-----LGYVHAMAHQLGGFYNLP-----HGVC---NAVLLPHVQV  
FNSKVAAARLRDCAAA-----MGVNVGTGKNAEG-AEACINAIARELAKKVD  
IPAGLRDLNVKEED----FAVLAANALK-DA-----CGFTNPIQATHEEIVAIYRAAM  
-----

>gi|147678976|ref|YP\_001213191.1| alcohol dehydrogenase [Pelotomaculum  
thermopropionicum SI]  
-----  
-----  
-----

-----MSSICKHVAPEI-IFG-RGALSQVGESAVRLGANKVFIVSDQGVVNA  
GWVERVLSYLKAAGLQYEIFSSVTSNPKHTEITEGLKRYLESECDSIMAVGGGSPDVAK  
SIATMATNG--GVIQDFE----GINKITKPLPPMLAVPTTAGAG-----  
---SEVTQFAIIVDKERKLMATISKSLVPDI-----AIIDPEV  
LQTKSARLTAAT-----GIDALSHAIEAYVSL-AAT  
PL-----TEVHLSALRLIAQNLRESVA-----CRTNMEAKT-----SMAMAS  
LQAGIAFSNAI-----LGAHAMVHQVDGFLDTH-----HGES---NACILPYVME  
FNLIACPGKFKQIAEA-----LGEDVTGLSTWAA-AKKAIAKAVRALVSDVG  
LAEGLAELGMKEEY----IPFSFRNALK-DA-----CLVTNPRDADENDIAEIRYRMA  
-----

>gi|24114857|ref|NP\_709367.1| putative alcohol dehydrogenase [Shigella flexneri 2a  
str. 301]  
-----  
-----  
-----

-----MASSTFFIPSVNVIG-ADSLTDAMNMMADYGFTRTLIVTDNMLTKL  
GMAGDVQKALEERNIFSUIYDGTQPNPTTENVAAGLKLLKENNCDSVISLGGGSPHCAK  
GIALVAANG--GDIRDYE----GVDRSAKQQLPMIAINTTAGTA-----  
---SEMTRFCIITDEARHNKMAIVDKHVTPLL-----SVNDSSL  
MIGMPKSLTAAT-----GMDALTHAIEAYVSI-AAT  
PI-----TDACALKAVTMIAENLPLAVE-----DGSNAKARE-----AMAYAQ  
FLAGMAFNNAS-----LGYVHAMAHQLGGFYNLP-----HGVC---NAVLLPHVQV  
FNSKVAAARLRDCAAA-----MGVNVGTGKNAEG-AEACINAIARELAKKVD  
IPAGLRDLNVKEED----FAVLATNALK-DA-----CGFTNPIQATHEEIVVIYRAAM  
-----

>gi|218707226|ref|YP\_002414745.1| putative alcohol dehydrogenase [Escherichia coli  
UMN026]  
-----  
-----  
-----

-----MAASTFFIPSVNVIG-ADSLNDAMNMMADYGFTRTLIVTDNMLTKL  
GMAGDVQKALEERNIFSUIYDGTQPNPTTENVAAGLKLLKENNCDSVISLGGGSPHCAK  
GIALVAANG--GDIRDYE----GVDRSAKQQLPMIAINTTAGTA-----  
---SEMTRFCIITDEARHIKMAIVDKHVTPLL-----SVNDSSL  
MIGMPKSLTAAT-----GMDALTHAIEAYVSI-AAT  
PI-----TDACALKAVTMIAENLPLAVE-----DGSNAKARE-----AMAYAQ  
FLAGMAFNNAS-----LGYVHAMAHQLGGFYNLP-----HGVC---NAVLLPHVQV  
FNSKVAAARLRDCAAA-----MGVNVGTGKNAEG-AEACINAIARELAKKVN  
IPAGLRDLNVKEED----FAVLATNALK-DA-----CGFTNPIQATHEEIVAIYRAAM  
-----

>gi|147677186|ref|YP\_001211401.1| alcohol dehydrogenase [Pelotomaculum  
thermopropionicum SI]  
-----  
-----  
-----

-----MKISYFWTSGTIITG-RGSLKRIADEAKGLGATRVLIVTDPVLLKT  
GLIERVKEALAPAGLETGIFSGVEPEPRLQIVTECLKAVKEGGYDLIVAVGGGSSMDVSK

SupplementalMultipleSequenceAlign.txt

AASVLMTNP--GTINDYL----GVNLIIPRPGIPVIAVPTTAGTG-----  
---SEVTPIAILSDVEEQLKKGVVSPYLLPRV-----AIVDPEL  
TVTMPAITAAT-----GMDALTHAVESYISV-NAT  
PI-----TDILALEAIRLIALNLRATA-----NGQDIARS-----NMSMAS  
LLAGIAFANAG-----VGAVHALAYPLGAQFHVP-----HGVA---NAVLLPYVME  
SNLLGALPRFKTMALA-----MGEKVEDLSDRLA-ADKFNEAIKLLAADIR  
IPLHLRELGVTAES----IPGMAEGAQVTR-----LLANNPRILSVSDIREIYERAF  
-----

>gi|110643834|ref|YP\_671564.1| putative alcohol dehydrogenase [Escherichia coli 536]

-----MAASTFFIPSVNVIG-ADSLNDAMNMMADYGFTRTLIVTDNMLTKL  
GMAGDVQKALEERNIFSVIYDGTQPNPTTENVAAGLKLLKENNCDVSVISLGGGSPHCAK  
GIALVAANG--GDIRDYE----GVDRSAKPQLPMIAINTTAGTA-----  
---SEMTRFCIITDEARHIKMAIVDKHVTPLL-----SVNDSSL  
MVGMPKSLTAAT-----GMDALTHAIEAYVSI-AAT  
PI-----TDACALKAVTMIAENLPLAVE-----DGSNAKARE-----AMAYAQ  
FLAGMAFNNAS-----LGYVHAMAHQLGGFYNLP-----HGVC---NAVLLPHVQV  
FNSKVAAARLRDCAAA-----MGVNVGTGKNAEG-AEACINAIARELAKKVD  
IPAGLRDLNVKEED----FAVLATNALK-DA-----CGFTNPIQATHEEIVAIYRAAM  
-----

>gi|215488872|ref|YP\_002331303.1| putative alcohol dehydrogenase [Escherichia coli  
O127:H6 str. E2348/69]

-----MAASTFFIPSVNVIG-ADSLNDAMNMMADYGFTRTLIVTDNMLTKL  
GMAGDVQKALEERNIFSVIYDGTQPNPTTENVAAGLKLLKENNCDVSVISLGGGSPHCAK  
GIALVAANG--GDIRDYE----GVDRSAKPQLPMIAINTTAGTA-----  
---SEMTRFCIITDEARHIKMAIVDKHVTPLL-----SVNDSSL  
MIGMPKSLTAAT-----GMDALTHAIEAYVSI-AAT  
PI-----TDACALKAVTMIAENLPLAVE-----DGSNAKARE-----AMAYAQ  
FLAGMAFNNAS-----LGYVHAMAHQLGGFYNLP-----HGVC---NAVLLPHVQV  
FNSKVAAARLRDCAAA-----MGVNVGTGKNAEG-AEACINAIARELAKKVD  
IPAGLRDLNVKEED----FAVLATNALK-DA-----CGFTNPIQATHEEIVAIYRAAM  
-----

>gi|157154897|ref|YP\_001465066.1| putative alcohol dehydrogenase [Escherichia coli  
E24377A]

-----MASSTFFIPSVNVIG-ADSLTDAMNMMADYGFTRTLIVTDNMLTKL  
GMAGDVQKALEERNIFSVIYDGTQPNPTTENVAAGLKLLKENNCDVSVISLGGGSPHCAK  
GIALVAANG--GDIRDYE----GVDRSAKPQLPMIAINTTAGTA-----  
---SEMTRFCIITDEARHIKMAIVDKHVTPLL-----SVNDSSL  
MIGMPKSLTAAT-----GMDALTHAIEAYVSI-AAT  
PI-----TDACALKAVTMIAENLPLAVE-----DGSNAKARE-----AMAYAQ  
FLAGMAFNNAS-----LGYVHAMAHQLGGFYNLP-----HGVC---NAVLLPHVQV  
FNSKVAAARLRDCAAA-----MGVNVGTGKNAEG-AEACINAIARELAKKVD  
IPAGLRDLNVKEED----FAVLATNALK-DA-----CGFTNPIQATHEEIVAIYRAAM  
-----

>gi|91213104|ref|YP\_543090.1| putative alcohol dehydrogenase [Escherichia coli  
UTI89]

-----MAASTFFIPSVNVIG-ADSLNDAMNMMADYGFTRTLIVTDNMLTKL  
GMAGDVQKALEERNIFSVIYDGTQPNPTTENVAAGLKLLKENNCDVSVISLGGGSPHCAK

SupplementalMultipleSequenceAlign.txt

GIALVAANG--GDIRDYE----GVDRSAKPQLPMIAINTTAGTA-----  
---SEMTRFCIITDEARHIKMAIVDKHVTPLL-----SVNDSSL  
MIGMPKSLTAAT-----GMDALTHAIEAYVSI-AAT  
PI-----TDACALKAVTMIAENLPLAVE-----DGSNAKARE-----AMAYAQ  
FLAGMAFNNAS-----LGYVHAMAHQLGGFYNLP-----HGVC---NAVLLPHVQV  
FNSKVAARLRDCAAA-----MGVNVGTGKND AEG-AEACINAI RELAKKVD  
IPAGLRDLNVKEED----FAVLATNALK-DA-----CGFTNPIQATHEEIVAIYRAAM  
-----

>gi|49176377|ref|YP\_026233.1| predicted Fe-containing alcohol dehydrogenase  
[Escherichia coli str. K-12 substr. MG1655]  
-----  
-----  
-----

-----MAASTFFIPSVNVIG-ADSLTDAMNMMADYGFTRTLIVTDNMLTKL  
GMAGDVQKALEERNIFSVIYDGTQPNPTTENVAAGLKLKKNNCDSVISLGGGSPHDCAK  
GIALVAANG--GDIRDYE----GVDRSAKPQLPMIAINTTAGTA-----  
---SEMTRFCIITDEARHIKMAIVDKHVTPLL-----SVNDSSL  
MIGMPKSLTAAT-----GMDALTHAIEAYVSI-AAT  
PI-----TDACALKAVTMIAENLPLAVE-----DGSNAKARE-----AMAYAQ  
FLAGMAFNNAS-----LGYVHAMAHQLGGFYNLP-----HGVC---NAVLLPHVQV  
FNSKVAARLRDCAAA-----MGVNVGTGKND AEG-AEACINAI RELAKKVD  
IPAGLRDLNVKEED----FAVLATNALK-DA-----CGFTNPIQATHEEIVAIYRAAM  
-----

>gi|37676187|ref|NP\_936583.1| alcohol dehydrogenase, class IV [Vibrio vulnificus  
YJ016]  
-----  
-----  
-----

-----MASAFFIPTVNLMG-AGCLKDAADSIKAQGFTKGLIVTDKILNQI  
GVVKQVQDLLSERHVEAVVFDGTQPNPTIGNVNAGLALLKQNECDFVISLGGGSPHDCAK  
GIALVAANG--GEIADYE----GVDKSAKPMLPLIAINTTAGTA-----  
---SEMTRFCIITDEERHIKMAIVDKHTTPLI-----SVNDPEL  
MLAKPASLTAAT-----GMDALTHAVEAYVSI-AAT  
PI-----TDAVAIKAIELIQAHLRTAVA-----HGDDIEARE-----QMAYAQ  
FMAGMAFNNAS-----LGYVHAMAHQLGGFYDLP-----HGVC---NAILLPHVQR  
YNAQVCPERLRDVAKA-----MGVNVEGMSAEQG-AEAAIDAIVALAKDVG  
IPAGIRELGAKSED----IPTLADNALK-DA-----CGFTNPKQATHEEISAI FEAM  
-----

>gi|27366481|ref|NP\_762008.1| alcohol dehydrogenase, class IV [Vibrio vulnificus  
CMCP6]  
-----  
-----  
-----

-----MG-AGCLKDAADSIKAQGFTKGLIVTDKILNQI  
GVVKQVQDLLSERHVETVFDGTQPNPTIGNVNAGLALLKQNECDFVISLGGGSPHDCAK  
GIALVAANG--GEIADYE----GVDKSAKPMLPLIAINTTAGTA-----  
---SEMTRFCIITDEERHIKMAIVDKHTTPLI-----SVNDPEL  
MLAKPASLTAAT-----GMDALTHAVEAYVSI-AAT  
PI-----TDAVAIKAIELIQAHLRTAVA-----HGDDIEARE-----QMAYAQ  
FMAGMAFNNAS-----LGYVHAMAHQLGGFYDLP-----HGVC---NAILLPHVQR  
YNAQVCPERLRDVAKA-----MGVNVEGMSAEQG-AEAAIDAIVALAKDVG  
IPAGIRELGAKSED----IPTLADNALK-DA-----CGFTNPKQATHEEISAI FEAM  
-----

>gi|39934280|ref|NP\_946556.1| putative alcohol dehydrogenase [Rhodopseudomonas  
palustris CGA009]  
-----  
-----  
-----

-----MTATTFIPSLNLF-AGCVSSAADHAKARGFKRALIVTDSGLHKL

SupplementalMultipleSequenceAlign.txt

GVADQIASMLIERNVTSVVFPGAKPNPTIKNVEDGLALLKQENCDCVISLGGGSAHDCAK  
GIALTATNG--GSIKDYE---GVDRSAHAQLPLIAINTTAGTA-----  
---SEMTRFCIITDEERQVKMAIVDRHTTPLL-----SVNDPVL  
MLGKPPALTAAT-----GMDALTHAIEAYVSI-AAT  
PI-----TDACALKAMSIISNSLRTVVA-----EGQNLVARE-----AMSYAG  
FLAGMAFNNAS-----LGYVHAMAHQLGGFYDLP-----HGVC---NAVLLPHVQA  
YNAQVAAGRLKDVABA-----LGVDTTGMTDAQG-ADAAIHAIQRLSADVG  
IPPGLGGLGMKEDT---VPILAANALK-DA-----CGFTNPKQATQTEIETIFRAAA  
-----

>gi|209695265|ref|YP\_002263194.1| alcohol dehydrogenase 2 [Aliivibrio salmonicida LFI1238]

-----MSAFFIPSINLMG-AGCLAEAMDSIKSQGYKKALIVTDNVLVAI  
GMVKQVSDLLAERGVEVAVFDGTQPNPTIGNVNAGLKILQENQCDLVISLGGGSPHDCAK  
GIALVAANG--GEIADYE---GVDQSPKQMPPLVAINTTAGTA-----  
---SEMTRFCIITDEARHIKMAIVDKHTTPLM-----SVNDPEL  
MLAKPASLTAAT-----GMDALTHAIEAYVSI-AAT  
PI-----TDAVAIKAMELIQAHLRTAVE-----DGQNLEARE-----QMAYAQ  
FMAGMAFNNAS-----LGYVHAMAHQLGGFYDLP-----HGVC---NAILLPHVQS  
YNAKVCPERLKDVAKA-----MGVNVEGMTNEEG-AQAALDAIKVLSKDVG  
IPSGLTALNAKEED---FDTLAENALK-DA-----CGFTNPKQATHDEIVNIFKAAM  
-----

>gi|54309683|ref|YP\_130703.1| putative alcohol dehydrogenase [Photobacterium profundum SS9]

-----MSSAFFIPSVNLMG-AGCLTEAADAVKAHGFKKALIVTDKVLNQI  
GVVKQVVDLLAERNVEAVVFDGTQPNPTMGNVEAGLALLKANECDFVISLGGGSPHDCAK  
GVALVASNG--GSISDYE---GVDVSAKQPLPLVAINTTAGTA-----  
---SEMTRFCIITDEARHIKMAIVDKNTTPLM-----SVNDPEL  
MLAKPASLTAAT-----GMDALTHAIEAYVST-AAT  
PI-----TDAVAIKAMELIQAHLRTAVN-----DGQNLEARE-----QMAYAQ  
FMAGMAFNNAS-----LGYVHAMAHQLGGFYDLP-----HGVC---NAVLLPHVQR  
YNAKVCPERLRDVAKA-----MGVNVESMTAEQG-ADAALAEIQVLSKDVG  
IPAGLKDLGAKNED---ISILADNALK-DA-----CGFTNPKQATHEEISEIFAAM  
-----

>gi|82545951|ref|YP\_409898.1| putative alcohol dehydrogenase [Shigella boydii sb227]

-----MASSTFFIPSVNVIG-ADSLTDAMNMMADYGFTRTLIVTDSMLTKL  
GMAGDVQKALEERNIFSVIYDGTQPNPTTENVAAGLKLKKNENCDVVISLGGGSPHDCAK  
GIALVAANG--GDIRDYE---GVDRSAKQPLPMIAINTTAGTA-----  
---SEMTRFCIITDEARHIKMAIVDKHVTPLL-----SVNDSSL  
MIGMPKSLTAAT-----GMDALTHAIEAYVSI-AAT  
PI-----TDACALKAVTMIAENLPLAVE-----DGSNAKARE-----AMAYAQ  
FLAGMAFNNAS-----LGYVHAMAYQLGGFYDLP-----HGVC---NAVLLPHVQV  
FNSKVAARLRDCAAA-----MGVNVVTGKNDAAEG-AEACINAIARELAKKVD  
IPAGLRDLNVKEED---FAVLATNALK-DA-----CGFTNPIQATHEEIVAIYRAAM  
-----

>gi|56459904|ref|YP\_155185.1| alcohol dehydrogenase [Idiomarina loihiensis L2TR]

-----MSSTFYIPAVNIIG-ENALKDAATQMDNYGFKQALIVTDPGMTKL  
GVTAIEIEALLKEHGIDSLIYDGVQPNPTVTNVKAGLDVLQKHQCDCVISLGGGSAHDCAK

SupplementalMultipleSequenceAlign.txt

GIALVATNG--GHISDYE----GVDVSKKPQLPLISINTTAGTA-----  
---SEMTRFCIITDPERHIKMAIVDQNVTPIL-----SVNDPRL  
MVGMPASLTAAT-----GMDALTHAVEAYVST-DAT  
PI-----TDACAIIKAEIIRDNLHEAVH-----NGANMEARE-----QMAYAQ  
FLAGMAFNNAS-----LGYVHAMAHQLGGFYDLP-----HGVC---NAVLLPHVQR  
YNSQVVAPRLKDIGKA-----LGAEVQGLTEKEG-ADAAIAAIVKLSQSVN  
IPAGLEELGAKEED----FNTLADNAMK-DA-----CGLTNPIQPSHEDIVTIFKAAF  
-----

>gi|34498183|ref|NP\_902398.1| alcohol dehydrogenase [Chromobacterium violaceum ATCC 12472]

-----MSTSAFFIPSLNLMG-AGCLQQAVDAMRGHGFRRALIVTDQGLVKA  
GLAAKVADMLGKADIEPVIIDGVHPNPSCANVNAGLALLKEKQCDVVVSLGGGSPHDCAK  
GIALVAVNG--GKIQDYE---GVDKSAKPQLPLVAINTTAGTA-----  
---SEMTRFCIITDESRHIKMAIVDKHTTPIL-----SVNDPET  
MAGMPASLTAAT-----GMDALTHAVEAYVST-IAT  
PI-----TDACALKAVELIAGFLRRAVK-----DGKDMEARE-----QMAYAQ  
FLAGMAFNNAS-----LGYVHAMAHQLGGFYDLP-----HGVC---NAVLLPHVQA  
FNAASAGERLGDVAIA-----LGEKTRS-----AQAIAIAIKRLAADVG  
IPAGLRELGVKEAD----IPTLADNALK-DA-----CGFTNPRKGSHEDEVCAIFRAAM  
-----

>gi|218550867|ref|YP\_002384658.1| putative alcohol dehydrogenase [Escherichia fergusonii ATCC 35469]

-----MAASTFFIPSVNVIG-ADSLNDAMNMMAEYGFRRTLIVTDSMLTQL  
GMAGDVQKALQERDIFSVIYDGTQPNPTTENVAAGLKLLTENNCDVSVISLGGGSPHDCAK  
GIALVAANG--GDIRDYE---GVDRSAKPQLPMIAINTTAGTA-----  
---SEMTRFCIITDEARHIKMAIVDKHVTPLL-----SVNDSSL  
MIGMPKSLTAAT-----GMDALTHAIEAYVSI-AAT  
PI-----TDACALKAVTMIAENLPLAVE-----DGSNAKARE-----AMAYAQ  
FLAGMAFNNAS-----LGYVHAMAHQLGGFYDLP-----HGVC---NAVLLPHVQV  
FNSKVAARLRDCAAA-----MGVNVTKGKNAEG-AEACINAIARELAKKVN  
IPAGLRDLNVKEED----IPVLTNALK-DA-----CGFTNPIQATHEEIMAIYRAAM  
-----

>gi|145299820|ref|YP\_001142661.1| alcohol dehydrogenase [Aeromonas salmonicida subsp. salmonicida A449]

-----MATFKFYIPAINLMG-AGCLQEAAADIKGYGYRKALIVTDKILNQI  
GVVAKLTTLLAEHGIESVVFDETKPNPTMTNVESGLAMIRANGCDCVSVISLGGGSPHDCAK  
GIALVAANG--GSIQDYE---GVDRSAKPQLPLIAINTTAGTA-----  
---SEMTRFCIITDEARQVKMAIIDKHVTPLM-----SVNDPEL  
MLAKPAGLTAAT-----GMDALTHAIEAYVST-IAT  
PV-----TDASAIMAIQLIAKHLRTAVN-----QGDDLHARE-----QMAYAQ  
FLAGMAFNNAS-----LGYVHAMAHQLGGFYDLP-----HGVC---NAVLLPHVQA  
YNAQVNAARLKDVARV-----MGVDVSTMNDEQG-AAAAIAAIKQLALDVK  
IPAGLEQLGVKADD----FDVLASNALK-DA-----CGFTNPKQASHEEIVAIIFRAAM  
-----

>gi|20091453|ref|NP\_617528.1| alcohol dehydrogenase [Methanosarcina acetivorans C2A]

-----MLN  
EAVVKQSCCQKELRSMTYTYLNPKVALMG-AGCVKEIGKHAKELGGTKALIVSGRSRHGE  
ELAGDIRKILETAGLKIAIFPGADPNPTDSSVMGAIIEYKENDLIVAVGGGSPMDCAK



SupplementalMultipleSequenceAlign.txt

AIGIVAKNG--GEINDYE----GIGKVTGKVPPLITVNTTAGTA-----  
---SEMTSFTIITDKRHIKMAIVDPRIITPDV-----AVNDPEL  
MVSMPALTAAT-----GMDALTHAVEAYVST-IAT  
PT-----TDAAAIKAIELISKYLPEAVA-----HGGDVRTRD-----MMAHAE  
YLAGIAFNNAS-----LGYVHSMHQGLGGLYDLP-----HGIC---NAILLPYVEM  
YNKEVCPERFADIKA-----MGEKVEGLSPEEA-ADKAIKAAIKKLAADIG  
IPSGLKELGAREED----LELLAENAMQ-DV-----CHLTNPRESKEEVIEIYRKAM

>gi|26250232|ref|NP\_756272.1| putative alcohol dehydrogenase [Escherichia coli CFT073]

-----MAASTFFIPSVNVIG-ADSLNDAMNMMADYGFTRTLIVTDNILTCL  
GMAGDVQKALEERNIFSUIYDGTQPNPTTENVAAGLKLKKNNCDSVISLGGGSPHDCAK  
GIALVAANG--GDIRDYE---GVDRSAKQPLPMIAINTTAGTA-----  
---SEMTRFCIITDEARHIKMAIVDKHVTPLL-----SVNDSSL  
MIGMPKSLTAAT-----GMDALTHAIEAYVSI-AAT  
PI-----TDACALKAVTMIAENLPLAVE-----DGSNAKARE-----AMAYAQ  
FLAGMAFNNAS-----LGYVHAMAHQLGGFYNLP-----HGVC---NAVLLPHVQV  
FNSKVAARLRDCAAA-----MGVNVGTGKNDAGE-AEACINAIARELAKKVN  
IPAGLRDLNVKEED---IPVLATNALK-DA-----CGFTNPIQATHEEIMAIYRAAM

>gi|126173559|ref|YP\_001049708.1| iron-containing alcohol dehydrogenase [Shewanella baltica OS155]

-----MAAKFFIPSVNVVLG-QGAVDDAIGDIKTLGFKHALIVTDKPLVKI  
GLVGEVAEKLQNGITSTIYDGVQPNPTVTNVEAGLALLKANKCDFVISLGGGSPHDCAK  
GIALVATNG--GSIKDYE---GLDQSAKQPLPLVAINTTAGTA-----  
---SEMTRFCIITDEARHIKMAIVDKHTTPLL-----SVNDPEL  
MLKKPASLTAAT-----GMDALTHAVEAYVSI-AAN  
PI-----TDACAIAKAMELIQANLVNAVE-----NGQDINARE-----QMAYAQ  
FLAGMAFNNAS-----LGYVHAMAHQLGGFYDLP-----HGVC---NALLPHVQE  
YNAQVVPARLKDIAKA-----MGVDVSSMTDEQG-ASAAIAAIKLSFAVK  
IPENLTLGVKAED---IPTLADNALK-DA-----CGFTNPKQATQAEICQIFTNAL

>gi|169829620|ref|YP\_001699778.1| NAD-dependent methanol dehydrogenase [Lysinibacillus sphaericus C3-41]

-----MSDVLKQFVMPKKNLFG-PGAIQEVGKHLNDLEVKKTIVTDEGLHKL  
GLSEQIANIITAAGIDVAIFPKAEPNPTDQNIEDGIADYHAESCDIVSLGGGSAHDAAK  
GIGLIASNG--GRIQDYE---GVDKSQNPLVPLIAINTTAGTA-----  
---SEMTRFTIITDTARKVKMAIVDKHVTPLL-----SINDSEL  
MIGLPPALTAAT-----GVDALTHAIESFVST-NAT  
PI-----TDACAQKVLQVPEFLPRAYA-----NGADLEARE-----QMVYAQ  
FLAGMAFNNAS-----LGYVHAIHQGLGGYYNLP-----HGVC---NAILLPHVCR  
FNVTARTERFARIAEL-----LGENVTGLSKRDA-AEKAIKSAIEKLSKDLN  
IPSGFRELGAKDED---IEILAKNAML-DV-----CAETNPRKATLDDIKQIITNAM  
GPVKKKEESLEAVAALS---

>gi|77920437|ref|YP\_358252.1| alcohol dehydrogenase, class IV [Pelobacter carbinolicus DSM 2380]

-----MRALAEQTFAFNIPTVSLLG-VGAQKQAGEQAKKLGQKALLVTDKGLVKL

SupplementalMultipleSequenceAlign.txt

GMAGDIQANIEQAGLQVVLFDGAEPNPTDKNVEAGLKVYRENGCDLIVSLGGGSSHDCAK  
AIGVVAANG--GSIRDYE----GLGKITKATPPKIAINTTAGTA-----  
---SEMTRFCVITNTDTHVKMPIAGSQVTPSV-----AINDPVL  
MLGLPPALTAAT-----GMDALTHAVEAYVSV-IAT  
PA-----TDACGLQAIELIAKWLKAVA-----NGQDLEARE-----RMAFAE  
YLAGMAFNNAS-----VGHVHAMAHQLGGFYNLP-----HGVC---NAVLLPVVEQ  
FNLIACPERFRDIAIA-----MGEDVEGLSVMDA-AEKAIAAIRRLSADVG  
IPDGLAELGVKEDD---IPVLAENASK-DI-----CTLNPRITTINDIISLYKTAM  
-----

>gi|161505791|ref|YP\_001572903.1| putative alcohol dehydrogenase [Salmonella  
enterica subsp. arizonae serovar 62:z4,z23:--]

-----MAASTFFIPSVNVIG-ADSLKDAMNTMAEYGFRRTLIVTDAMLTKL  
GMAGDIQKALQKRDI FSVIYDGTQPNPTTSNVAAGL KLLKENGCD SVISLGGGSPHDCAK  
GIALVAANG--GDIRDYE----GVDRSAKQPLPMIAINTTAGTA-----  
---SEMTRFCIITDEERHIKMAIVDKHVTPLL-----SVNDSSL  
MVGMPKSLTAAT-----GMDALTHAIEAYVSI-AAT  
PI-----TDACALKAVTMIAENLIVAVE-----EGSNVQARE-----AMAYAQ  
FLAGMAFNNAS-----LGYVHAMAHQLGGFYNLP-----HGVC---NAVLLPHVQV  
FNSQVAAARLRDCAAA-----MGVDVSGMNEAEG-AQACVAAIRQLS QKVN  
IPAGLRELNVKEED---IPVLATNALK-DA-----CGLTNPIQATHDEIVEIYRAAM  
-----

>gi|160874467|ref|YP\_001553783.1| iron-containing alcohol dehydrogenase [Shewanella  
baltica OS195]

-----MAAKFFIPSVNVLG-QGAVDDAIGDIKTLGFKHALIVTDKPLVKI  
GLVGEVAEKLQNGITSTIYDGVQPNPTVTNVEAGLALLKANKCDFVISLGGGSPHDCAK  
GIALVATNG--GSIKDYE----GLDQSAKQPLPLVAINTTAGTA-----  
---SEMTRFCIITDEARHIKMAIVDKHTTPLL-----SVNDPEL  
MLKKPASLTAAT-----GMDALTHAVEAYVSI-AAN  
PI-----TDACA IKAMELIQANLVNAVE-----NGQDINARE-----QMAYAQ  
FLAGMAFNNAS-----LGYVHAMAHQLGGFYDLP-----HGVC---NALLPHVQE  
YNAQVVPARLKDIAKA-----MGVDVSNMTDEQG-ASAAIAAIK KLSVAVK  
IPENLTL LGVKAED---IPTLADNALK-DA-----CGFTNPKQATHAEICQIFTNAL  
-----

>gi|222053378|ref|YP\_002535740.1| iron-containing alcohol dehydrogenase [Geobacter  
sp. FRC-32]

-----MALAEQTYGFFIPTVSLMG-IGCSKETGAQAKALGATNLLIVTDAGLSKM  
GVADKIKAQ LVEAGLKAVIFDGAEPNPTDKNVHDGKVVYLD SKCDGIVSLGGGSSHDCGK  
GIGLVIGNG--GNIRDFE----GVNKSTKPMPPFLAINTTAGTA-----  
---SEMTRFCIITNTDTHVKMAIVDWRCTPNI-----AINDPVL  
MVGKPPALTAAT-----GMDALTHAVEAYVST-IAT  
PI-----TDACA IKAIELVAANLSVAVA-----NGDNLEARD-----AMAYAE  
YLAGMAFNNAS-----LGYVHSM AHQLGGFYNLP-----HGVC---NAILLPAVSQ  
FNLIACPKRFADIAVA-----LGENIAGLSVTEA-AEKAISAIRKLSASIG  
IPAGL KELNVKEED---LKIMAENAKK-DA-----CQLTNPRKATLEQVIDIYKAAM  
-----

>gi|77917873|ref|YP\_355688.1| alcohol dehydrogenase, class IV [Pelobacter  
carbinolicus DSM 2380]

SupplementalMultipleSequenceAlign.txt

-----MSIRKFVTPEI-IFG-QGALSQIGESAARSGASKVFVVDQGLIDA  
GWVDKALYYLRNAGLQYEIFSSITSNPKDLEVTGVAHYLRSGCDALVAVGGGSPADTAK  
AIATLATNG--GELQDYE----GVNKIRHPLPPMVIVPSTAGTG-----  
---SEVSQFAIIVDHQRRLKMSIISKSLIPDI-----AIIDPDL  
LNTKSARLAAAT-----GMDALSHAIESYVSL-AAT  
PL-----TDIHALNAIRLIFANLKQSVF-----DRQDAVANN-----NMAMAS  
LNAGIAFSNAI-----LGAGHAMTHQIDGLLDTH-----HGET---NATLLPHIMQ  
FNLVPCRDKFNAIARQ-----IDEAASQAGPKQDLAEKAIEAVSTLTKEIG  
LHNRLASVGLKKEN----IKTLSQNALN-DA-----CLVTNPRDATAEDIEKFLFKAY  
-----

>gi|218676223|ref|YP\_002395042.1| Alcohol dehydrogenase II [Vibrio splendidus LGP32]

-----MSTAFYIPTINFMG-TGCLKDAADSIQSQGFKKGLIVTDKILNQI  
GVVKQVQDLLSQRGVDVAVFDGTQPNPTITNVNDGLELLTDNDCDFVVSLLGGGSPHCAK  
GIALVASNG--GKIADYE----GVDQSEKPMPLIAINTTAGTA-----  
---SEMTRFCIITDEARHIKMAIVDKHTTPLI-----SVNDPEL  
MLAKPASLTAAT-----GMDALTHAIEAYVSI-AAT  
PI-----TDAVAIKAIELVQAHRLTAVA-----HGEDIARE-----QMAYAQ  
FMAGMAFNAS-----LGYVHAMAHQLGGFYDLP-----HGVC---NAILLPHVQR  
YNAQVCPDRLRDVAKA-----MGVNVEGMTAEQG-AEAAINAIVQLANDVN  
IPTGIAQLGAKLED----IPTLSDNALK-DA-----CGFTNPKQATHEEISAI FEAM  
-----

>gi|30064145|ref|NP\_838316.1| L-1,2-propanediol oxidoreductase [Shigella flexneri 2a str. 2457T]

-----MANRMILNETAWFG-RGAVGALTDEVKRRGYQKALIVTDKTLVQC  
GVVAKVTDKMDAAGLAWAIYDGVVNPPTITVVKKEGLGVFNQSGADYLIAIGGGSPQDTCK  
AIGIISNNPEFADVRSLE----GLSPTNKPSVPILAIPTTAGTA-----  
---AEVTINYVITDEEKRRKFVCDPHDIPQV-----AFIDADM  
MDGMPPALKAAT-----GVDALTHAIEGYITR-GAW  
AL-----TDALHIKAIIEIAGALRGSVA-----GDKDAGE-----EMALGQ  
YVAGMGFSNVG-----LGLVHGMAHPLGAFYNTF-----HGVA---NAILLPHVMR  
YNADFTGEKYRDIARV-----MGVKVEGMSLEGA-RNAAVEAVFALNRDVG  
IPPHLRDVGVRKED----ISALAQALD-DV-----CTGGNPREATLEDIVELYHTAW  
-----

>gi|152999844|ref|YP\_001365525.1| iron-containing alcohol dehydrogenase [Shewanella baltica OS185]

-----MAAKFFIPSVNVLG-QGAVDDAIGDIKTLGFKHALIVTDKPLVKI  
GLVGEVAEKLQNGITSTIYDGVQPNPTVTNVEAGLALLKANNCDFVISLGGGSPHCAK  
GIALVATNG--GSIKDYE----GLDQSAKQPLPLVAINTTAGTA-----  
---SEMTRFCIITDEARHIKMAIVDKHTTPLL-----SVNDPEL  
MLKKPASLTAAT-----GMDALTHAVEAYVSI-AAN  
PI-----TDACAIKAMELIQANLVNAVE-----NGQDINARE-----QMAYAQ  
FLAGMAFNAS-----LGYVHAMAHQLGGFYDLP-----HGVC---NALLLPHVQE  
YNAQVVPARLKDIAKA-----MGVDVSGMTDEQG-ASAAIAAIKLSVAVK  
IPENLTLGVKAED----IPTLADNALK-DA-----CGFTNPKQATHAEICQIFTNAL  
-----

>gi|148264466|ref|YP\_001231172.1| iron-containing alcohol dehydrogenase [Geobacter uraniireducens Rf4]

SupplementalMultipleSequenceAlign.txt

-----MALGEQTYGFYIPTVSLMG-IGCSKETGAQAKALGATNLLIVTDAGLSKM  
GVADKIKAQLEEAGLKAVIFDGAEPNPTDKNVHDGKVKVYQDNKCDGIVSLGGGSSHDCGK  
GVGLVIGNG--GHIRDFE----GVNKSAPMPFFLAINTTAGTA-----  
---SEMTRFCIITNTDTHVKMAIVDWRVTPNI-----AINDPLL  
MVGKPSALTAAT-----GMDALTHAVEAYVST-IAT  
PI-----TDACAIAKIELIAQNLSTAVA-----NGENLEARD-----AMAYAE  
YLAGMAFNNAS-----LGYVHSMHQLGGFYNLP-----HGVC---NAILLPAVSQ  
FNIIACPKRFADIAAA-----LGENITGLSVVEA-ADKAIAAIRRLSASIG  
IPAGLKSLNVKEED----LKVMAENAKK-DA-----CQLTNPRKATLEQVIDIFKAAM  
-----

>gi|197118368|ref|YP\_002138795.1| iron-containing alcohol dehydrogenase [Geobacter  
bemidjiensis Bem]

-----MEISKFVAPEI-IFG-RGSLSQIGESVVR LGVSKVFMVSDDHVIAA  
GWVDQAVEYLRAAGLETVIFSSLTTNPKDREVTEGTAKYLSSGCDGIVSVGGGSPDVAK  
AIAIIASNG--GKLQDYE----GVNKISLPLPPMVIVPSTAGAG-----  
---SEVSQFAIIVDTRKRLKMSIISRSLIPDI-----AIVDPEL  
LKTAKDAKLAAT-----GVDALTHGIESYVSL-AAT  
PL-----TDIHALKAIQLISKNLRRAVA-----VRSDMDANT-----NMAMAS  
LTAGLAFSNAI-----LGAHAMTHQVDGLLDQH-----HGET---NASILPHVMR  
FNLQACPERFRDIAVA-----MGEDVTGLELMAA-AERSIDAVKALIAEIG  
LDQGLSELGLREEF---IPLLENATK-DA-----CLLTNPRSATREQIEEIYRNAM  
-----

>gi|89901502|ref|YP\_523973.1| iron-containing alcohol dehydrogenase [Rhodofera  
ferrireducens T118]

-----MSQFSFETAPRIICE-QGGANRLGEIAKGMGISRLFLVTDAGLIKA  
KLIDGALASLTAAGVAATVFSVDVLADPPEL SVQAAVDAARAAGADGVLGFGGGSSLDTAK  
LVALLACTP--QALPDIY----GIGLARGPRLPLIQVPTTAGTG-----  
---SEVTPISILT-TPSHEKKGVSPLLYPDV-----ALLDSRL  
TLGLPPTVTAMT-----GVDAMVHAIESFSTRLLKKN  
PL-----SDALAIKALQLLYANLPAAVN-----DGKDPTVRE-----NMLLGS  
LFAGMAFANAP-----VGAVHALAYPLGGHYGLP-----HGLT---NSLVFVAVLR  
FNLAQAQGLYAEI LGRA-----ILPELAAAGDSEA-AASFVAASARVAAMP  
YAQSLRDAGVKQDD----LPLMARDAMNVQR-----LLVNNPRDVSFDDALAMYQAAY  
-----

>gi|89901636|ref|YP\_524107.1| iron-containing alcohol dehydrogenase [Rhodofera  
ferrireducens T118]

-----MSTTFFIPAVNIMG-AGCLQEAILAIRGYGFHKALIVTDTVLNKL  
GVAGQIQSLLTAQEIESVVDGAKPNPTVGNVKAGLTQLKEHQCDFVISLGGGSPHCAK  
GIALCASNG--GEISDYE----GVDRSAKPLPLVSINTTAGTA-----  
---AEMTRFCIITDEV RHIKMAIVDRNVTPLM-----SVNDPNL  
MLAKPKGLTAAT-----GMDALTHAVEAYVST-AAT  
PI-----TDACALKAVELISRNLRTAVA-----HGDNLQARE-----QMAYAQ  
FLAGMAFNNAS-----LGYVHAMSHQLGGFYDLP-----HGVC---NALLPHVQA  
FNAATSAERLRDVARA-----MGVSVDGMDAAAG-AQA CLSAIRKLSMDIG  
IPASLSELGVKEKD---IPLLTENALK-DA-----CGLTNPRKASQAEIEAIFRGAM  
HAPVAAGQAQHKATRESAPA

>gi|148264435|ref|YP\_001231141.1| iron-containing alcohol dehydrogenase [Geobacter  
uraniireducens Rf4]

SupplementalMultipleSequenceAlign.txt

-----MNISKFVAPEI-IFG-RGSLSQLGESVVRIGASKVFLVSDDGVINAGWVDQAVYYLRAAGVEAEIFSSLTTNPKDFEVTEGVIRYREARCDGIVAVGGGSPDVAKAVAMLAANG--GRLQDYE----GINKISRPLPPMVIAPSTAGAG-----SEVSQFTIIVDTVRKLMKSIISKSLVPI-----AIVDPEL LKSKDAKLAAT-----GIDALTHGIESYVSL-AAT PL-----TDIHALKAIQLISYNLVRVA-----DRLDMEANA-----NMAMAA LTAGLAFSNAI-----LGAHAMTHQVDGLIDQH-----HGET--NASILPHVME FNLHTCPDRFRDIAIA-----MGKDVAGLDTLAA-AELSIEAVKRLIADIG LDKGLAQIGLKEEF----IPLLSRNAMK-DA-----CLVTNPRSATCEEIEAIFRKAM

>gi|206580795|ref|YP\_002236838.1| lactaldehyde reductase [Klebsiella pneumoniae 342]

-----MANRMILNETAWFG-RGAINALTDEVARRGYRKALIVTDSTLARC GVAAKVTDKLDAAGLAWDMFSDVIPNPTIIVVQQGLQAFQRSADYLIAIGGGSPQDTCK AIGIQRNPEFADVRSLE----GLSPTRQPSVPIFAVPTTAGTA-----AEVTINYVITDEEQRRKFVCVDPHDIPQV-----AFIDADM MDAMPPALKAAT-----GVDALTHAIEGYLTR-GAW AL-----TDALHLKAIETIAGALRGSVA-----GDAGAGE-----AMALGQ YVAGMGFSNVG-----LGLVHGMAHPLGAFYNT-----HGVA--NAILLPHVMR FNAEATGEKYRDIARS-----MGVRVEALSLTAA-RQAAVEAVCQLNRDVG IPGHLREVGVRKED----IPALQAALD-DV-----CTGGNPREASLADIVGLYQAAW

>gi|170682829|ref|YP\_001744963.1| lactaldehyde reductase [Escherichia coli SMS-3-5]

-----MMANRMILNETAWFG-RGAVGALTDEVKRRGYQKALIVTDKTLVQC GVVAKVTDKMDAAGLAWAIYDGVVNPPTITVVKEGLGVFQNSGADYLIAIGGGSPQDTCK AIGIISNNPEFADVRSLE----GLSPTNKPSVPILAIPTTAGTA-----AEVTINYVITDEEKRRKFVCVDPHDIPQV-----AFIDADM MDGMPPALKAAT-----GVDALTHAIEGYITR-GAW AL-----TDALHIKAIETIAGALRGSVA-----GDKDAGE-----EMALGQ YVAGMGFSNVG-----LGLVHGMAHPLGAFYNT-----HGVA--NAILLPHVMR YNADFTGEKYRDIARV-----MGLKVEGMSLEEA-RNAAVEAVFALNRDVG IPPHLRDVGVRKED----IPALQAALD-DV-----CTGGNPREATLEDIVELYHTAW

>gi|157159169|ref|YP\_001464122.1| L-1,2-propanediol oxidoreductase [Escherichia coli E24377A]

-----MANRMILNETAWFG-RGAVGALTDEVKRRGYQKALIVTDKTLVQC GVVAKVTDKMDAAGLAWAIYDGVVNPPTITVVKEGLGVFQNSGADYLIAIGGGSPQDTCK AIGIISNNPEFADVRSLE----GLSPTNKPSVPILAIPTTAGTA-----AEVTINYVITDEEKRRKFVCVDPHDIPQV-----AFIDADM MDGMPPALKAAT-----GVDALTHAIEGYITR-GAW AL-----TDALHIKAIETIAGALRGSVA-----GDKDAGE-----EMALGQ YVAGMGFSNVG-----LGLVHGMAHPLGAFYNT-----HGVA--NAILLPHVMR YNADFTGEKYRDIARV-----MGVKVEGMSLEEA-RNAAVEAVFALNRDVG IPPHLRDVGVRKED----IPALQAALD-DV-----CTGGNPREATLEDIVELYHTAW

>gi|146295466|ref|YP\_001179237.1| alcohol dehydrogenase [Caldicellulosiruptor saccharolyticus DSM 8903]

SupplementalMultipleSequenceAlign.txt

-----MKTYRFYMPPIISLMG-RGCLKDVGQEIKALGYKKALIVTDKSLVKI  
GLVKKVTDMLDEANINYVIFDETKPNPTVKNVEDGLKMLKDNNCDFLISIGGGSPHCAK  
GIGLVATNG--GSIKDYE----GVNKSQKPIPLVVAINTTAGTG-----  
---SEVTRFAIITDEDRHVKMAIVDWHVTPLI-----AVNDPEL  
MIEMPKSLTAAT-----GMDALTHAIEAYLST-DAT  
PV-----TDASALMAIELIFKYLKKAWE-----NGNDIEARE-----KMAYAE  
YLAGVAFNNAG-----LGYVHAMAHQLGGFYDLP-----HGVC---NAVLLPHVLA  
YNFKAVPHRFIDIKA-----LGIDVQGASQEKV-GEMVIEGIKDLSTGIG  
IPAGLKELGAKDED----IRTLAENALK-DA-----CGLTNPRQATVEEIMEIYKAAF  
-----

>gi|170018955|ref|YP\_001723909.1| L-1,2-propanediol oxidoreductase [Escherichia coli ATCC 8739]

-----MMANRMILNETAWFG-RGAVGALTDEVKRRGYQKALIVTDKTLVQC  
GVVAKVTHKMDAAGLAWAIYDGVVNPNTITVVKEGLGVFQNSGADYLIAIGGGSPQDTCK  
AIGIISNNPEFADVRSLE----GLSPTNKPSVPILAIPTTAGTA-----  
---AEVTINYVITDEEKRRKFCVCDPHDIPQV-----AFIDADM  
MDGMPPALKAAT-----GVDALTHAIEGYITR-GAW  
AL-----TDALHIKAIIEIAGALRGSVA-----GDKDAGE-----EMALGQ  
YVAGMGFSNVG-----LGLVHGMAHPLGAFYNTP-----HGVA---NAILLPHVMR  
YNADFTGEKYRDIARV-----MGVKVEGMSLEEA-RNAAVEAVFALNRDVG  
IPPHLRDVGVRKED----IPALQAALN-DV-----CTGGNPREATLEDIVELYHTAW  
-----

>gi|108757039|ref|YP\_633768.1| alcohol dehydrogenase, iron-containing [Myxococcus xanthus DK 1622]

-----MKPFDIPSEPRVTEMAWPTRIVFG-AGALLRLPAQAQRLGIQRPLLVTAGVVK  
GLAARVADVLNTAGLACEVFDRVEPNPTERDVFAGLEAYRSHSCDGIVALGGGSALDAGK  
LIQLLTTHE--PPLSRYDDAKGGDQYVRDDLPLIAIPTTAGTG-----  
---SEVGRSGVVTLEDTGRKTVIFSPYLLPRA-----AICDPEL  
TLGLPPGITAAT-----GMDAFTHCLEAYLAN-GFH  
PL-----ADAVAIDGIYRVGRSLETAVR-----DGKDLAART-----DMMVAA  
MEGAMAFQK-G-----LGACHALAHALTPVSNVH-----HGLA---NAIVLPVME  
FNRAVCTARLARVAVA-----LGDTTQAREEVL--AGNAIDRVRKLNAAVG  
IPSRLRDAGVQEKD----LERIAEKAFQ-DA-----SHLSNPRKVSQADLLALAREAY  
-----

>gi|74313371|ref|YP\_311790.1| L-1,2-propanediol oxidoreductase [Shigella sonnei Ss046]

-----MMANRMILNETAWFG-RGAVGALTDEVKRRGYQKALIVTDKTLVQC  
GVVAKVTDKMDAAGLAWAIYDGVVNPNTITVVKEGLGVFQNSGADYLIAIGGGSPQDTCK  
AIGIISNNPEFADVRSLE----GLSPTNKPSVPILAIPTTAGTA-----  
---AEVTINYVITDEEKRRKFCVCDPHDIPQV-----AFIDADM  
MDGMPPALKAAT-----GVDALTHAIEGYITR-GAW  
AL-----TDALHIKAIIEIAGALRGSVA-----GDKDAGE-----EMALGQ  
YVAGMGFSNVG-----LGLVHGMAHPLGAFYNTP-----HGVA---NAILLPHVMH  
YNADFTGEKYRDIARV-----MGVKVEGMSLEEA-RNAAVEAVFALNRDVG  
IPPHLRDVGVRKED----IPALQAALD-DV-----CTGGNPREATLEDIVELYHTAW  
-----

>gi|77461342|ref|YP\_350849.1| Iron-containing alcohol dehydrogenase [Pseudomonas fluorescens Pf0-1]

SupplementalMultipleSequenceAlign.txt

-----MSLSSFKIAHKLITG-AGAIEQLAAELTRLDIDNPLIVTDAALVKS  
GTVELALAQIGER--EYEIFDRVLPDPEIAIVEDCMRVYREGGHDGLIGLGGGSAIDIAK  
SVAAYAGYH--GALEDLF----GVDQVPRKGPPLIAIPTTAGTG-----  
---SEVTNVAILSDKVAQLKKGIVSDYLLPDV-----ALVSPQM  
TLTCPRSVTAAS-----GVDALVHAIESYLSL--NAS  
PI-----TDSLAIIGAIIKLIARSLPKAYA-----NPSNLQARE-----DMATAS  
LMAGMAFGNAG-----VGAVHALAYPLGGRFNIA-----HGVS---NALLPYVMT  
WNKMACVERMQDIAEA-----MGVKTAHLSLNEA-ADSAVAAMTELCAAVE  
IPLGLRSFGVPEEA---IPAMAVEAAGIER-----LMRNNPRKLSAADIEKIYRAAY  
-----

>gi|118580417|ref|YP\_901667.1| iron-containing alcohol dehydrogenase [Pelobacter propionicus DSM 2379]

-----MALAEQVYNFYIPAITKMG-IGAVKELGPCAQFLKGTKALLVTDKGMADL  
GVADRMKQLLEVDGVQCVIIFSGAEPNPTDLNVRAGIKVYRENNCDMLVSLGGGSSHCAK  
GIGIVATND--GDIRDFA---GVDTFKNALPPFIAINTTAGTA-----  
---SEMTSFAVITNSDIHVKMI FASPRITATI-----AINDPAL  
MVGLPAPLTAST-----GMDALTHAVEAYVAA--LAN  
PV-----TDACAIAAIKLI AEYL PQAVA-----NGSNLEARD-----KMAYAE  
YLAGMAFSNAG-----IGIVHAMAHQPGALLNKP-----HGVC---NAILLPHGCS  
FNLIACPQRYADIAQA-----MGVDTTGLMPMEA-AERGVEAIRKLSAAVG  
IPAGLSEIGVKTS---IPTLAENAIK-DI-----CCLFNPRTIKLDDLTRLYTEAM  
-----

>gi|89893311|ref|YP\_516798.1| hypothetical protein DSY0565 [Desulfitobacterium hafniense Y51]

-----MSVVHQVYGYMPTVNLMG-AGAAQEAGKQAKILGGKTALLVTD AFLNQS  
GLAKQIAEIIIEAEGVKVVIYPGAEPNPTDKNVHDGVAVFEKENCNMIVSLGGGSAHCAK  
GVGLVAGNG--GNIRDFE---GVDKSAKPMVPMIAVNTTAGTA-----  
---SEMTRFCIITDTRHIKMAIVDWHATPNV-----SINDPLL  
MIGKPAPLTAAT-----GMDALTHAVEAYVST-AAT  
PI-----TDSAALMAIKLISKYL RRAVA-----NGQDFEARD-----QMAYAQ  
FLAGMAFNAS-----LGYVHAMAHQLGGFYNLP-----HGVC---NAILLPRVSR  
FNLIGNLERFVDIAEA-----LGEEIKNLSARDA-AEKALTAMTTLSQDIS  
IPSGLTELGVKEED---LQTMVAVNAMK-DA-----CSLTNPRLAKLEDIIQIYKNSL  
-----

>gi|15803321|ref|NP\_289354.1| L-1,2-propanediol oxidoreductase [Escherichia coli O157:H7 EDL933]

-----MMANRMILNETAWFG-RGAVGALTDEVKRRGYQKALIVTDKTLVQC  
GVVAKVTDKMDAAGLAWAIYDGVVNPNTITVVK EGLGVFQNSGADYLIAIGGGSPQDTCK  
AIGIISNNPEFADVRSLE---GLSPTNKPSVPILAIPTTAGTA-----  
---AEVTINYVITDEEKRRKFVCVDPHDIPQV-----AFIDADM  
MDGMPPALKAAT-----GVDALTHAIEGYITR-GAW  
AL-----TDALHIKAI EIIAGALRGSVA-----GDKDAGE-----EMALGQ  
YVAGMGFSNVG-----LGLVHGMAHPLGAFYNTN-----HGVA---NAILLPHVMR  
YNADFTGEKYRDIARV-----MGVKVEGMSLEEA-RNAAVEAVFALNRDVG  
IPPHLRDVGVRKED---IPALAQALD-DV-----CTGGNPREATLEDIVELYHTAW  
-----

>gi|82778178|ref|YP\_404527.1| L-1,2-propanediol oxidoreductase [Shigella dysenteriae sd197]

SupplementalMultipleSequenceAlign.txt

-----  
-----  
-----MMANRMILNETAWFG-RGAVGALTDEVKRRGYQKALIVTDKTLVQC  
GVVAKVTDKMDAAGLAWAIYDGVVNPNTITVVKEGLGVFQNSGADYLIAIGGGSPQDTCK  
AIGIISNNPEFADVRSLE----GLSPTNKPSVPILAIPTTAGTA-----  
---AEVTINYVLTDEEKRRKFVCVDPHDIPQV-----AFIDADM  
MDGMPPALKAAT-----GVDALTHAIEGYITR-GAW  
AL-----TDALHIKAIETIAGALRGSVA-----GDKDAGE-----EMALGQ  
YVAGMGFSNVG-----LGLVHGMAHPLGAFYNTP-----HGVA---NAILLPHVMR  
YNADFTGEKYRDIARV-----MGVKVEGMSLEEA-RNAAVEAVFALNRDVG  
IPPHLRDVGVRKED----IPALAQALD-DV-----CTGGNPREATLEDIVELYRTAW  
-----

>gi|66047214|ref|YP\_237055.1| Iron-containing alcohol dehydrogenase [Pseudomonas  
syringae pv. syringae B728a]  
-----  
-----

-----  
-----  
-----MISTFFIPAVNIIG-TGCIDEAMLAIKRYGFRKALIVTDAGLARA  
GVASQVAGLLVEQGIDSVVYDGARPNPTIANVENGLALLQERQCDFVISLGGGSPHDCAK  
GIALCASNG--GHISDYE----GVDRSAKPQLPLIAINTTAGTA-----  
---SEMTRFCIITDEARHVKMAIIDRNVTPLL-----SVNDPDM  
MVAMPRLTAAT-----GMDALTHAIEAYVST-AAN  
PI-----TDACALQAMALIANNLRDAFN-----NGANITARE-----NMAYAQ  
FLAGMAFNNAS-----LGYVHAMAHQLGGFYDLP-----HGVC---NAVLLPHVQR  
FNASVSAARLTDVAHA-----MGSNIRGLSPEEG-AQAIDAIRALSAAVE  
IPAGLATLGVKEED----FPMLASNALK-DA-----CGLTNPRPADLEIQIDIFRQAL  
-----

>gi|218701516|ref|YP\_002409145.1| L-1,2-propanediol oxidoreductase [Escherichia coli  
IAI39]  
-----  
-----

-----  
-----  
-----MMANRMILNETAWFG-RAAVGALTDEVKRRGYQKALIVTDKTLVQC  
GVVAKVTDKMDAAGLAWAIYDGVVNPNTITVVKEGLDVFQNSGADYLIAIGGGSPQDTCK  
AIGIISNNPEFADVRSLE----GLSPTNKPSVPILAIPTTAGTA-----  
---AEVTINYVITDEEKRRKFVCVDPHDIPQV-----AFIDADM  
MDGMPPALKAAT-----GVDALTHAIEGYITR-GAW  
AL-----TDALHIKAIETIAGALRGSVA-----GDKDAGE-----EMALGQ  
YVAGMGFSNVG-----LGLVHGMAHPLGAFYNTP-----HGVA---NAILLPHVMR  
YNADFTGEKYRDIARV-----MGVKVEGMSLEEA-RNAAVEAVFALNRDVG  
IPPHLRDVGVRKED----IPALAQALD-DV-----CTGGNPREATLEDIVELYHTAW  
-----

>gi|113866887|ref|YP\_725376.1| alcohol dehydrogenase, class IV [Ralstonia eutropha  
H16]  
-----  
-----

-----  
-----  
-----MRARPARAPKRKAQERPSSSRMPACTRWGYPKPSRGTSAR-----  
-----QGFRPLIFPGAEPNPTDVNVHDGVKLFQEGCDFIVSLGGGSSHDCAK  
GIGLVTAGG--GHIRDYE----GIDKSTVPMTPLISINTTAGTA-----  
---AEMTRFCIITNSSNHVKMAIVDWRCTPLI-----AIDDPRL  
MVAMPALTAAT-----GMDALTHAVEAYVST-AAT  
PI-----TDACA EKAIALIGEWLPKAVA-----NGNSLEARA-----AMCYAQ  
YLAGMAFNNAS-----LGYVHAMAHQLGGLYNLP-----HGVC---NAILLPHVSE  
FNLIAAPERFAKIAEL-----LGENVASLSTSDA-AKAATSAIRALAASIG  
IPAGLASLGVKAED----HEVMAHNAQK-DA-----CMLTNPRRATTAQVIAIFAAM  
-----

>gi|77917867|ref|YP\_355682.1| alcohol dehydrogenase, class IV [Pelobacter  
carbinolicus DSM 2380]  
-----  
-----



SupplementalMultipleSequenceAlign.txt

-----  
-----  
-----MPIVNLAETTYGFFIPSVTLMG-PGCAKEVGPKANELGAKKALLVTDAGLMKM  
GVADTIAGYIKDAGVEVTIYPGAEPNPTDKNVHDGKVKVYEDEGCDFIVSLGGGSSHDCAK  
GIGLVTAGG--GNIRDYE----GVNKSTVPMTPLIAINTTAGTA-----  
---SEMTRFCIITNLETHVKMAIVDWRCTPLI-----AVDDPVL  
MLGKPPALTAAT-----GMDALTHAVEAYVST-IAT  
PI-----TDACA EKAIRLIAEWLRPAVA-----MGANIEARD-----AMCYAQ  
YLAGMAFNNAS-----LGYVHAMAHQLGGFYNLP-----HGVC---NAILLPSVCD  
YNMIACPDRFADIADF-----MGVDTTGMPVTEA-AAAGIEAIRELSASIG  
IPAGLTELNVKEED----LKTMAENAQK-DA-----CMLTNPRTATLDQVIDIYKAAM  
-----

>gi|218690922|ref|YP\_002399134.1| L-1,2-propanediol oxidoreductase [Escherichia coli ED1a]

-----  
-----  
-----MMANRMILNETAWFG-RGAVGSLTDEVKRRGYQKALIVTDKTLVQC  
GVVAKVIDKMDAAGLAWAIYDGVVNPNTITVVKEGLDVFQNSGADYLIAIGGGSPQDTCK  
AIGIISNNPEFADVRSLE----GLSPTNKPSVPILAIPTTAGTA-----  
---AEVTINYVITDEEKRRKFVCDPHDIPQV-----AFIDADM  
MDGMPPALKAAT-----GVDALTHAIEGYITR-GAW  
AL-----TDALHIKAIETIAGALRGSVA-----GDKDAGE-----EMALGQ  
YVAGMGFSNVG-----LGLVHGMAHPLGAFYNTF-----HGVA---NAILLPHVMR  
YNADFTGEKYHDIARV-----MGVKVEGMSLEEA-RNAAVEAVFALNRDVG  
IPPHLRDVGVRKED----IPALQAALD-DV-----CTGGNPREATLEDIVELYHTAW  
-----

>gi|157162253|ref|YP\_001459571.1| L-1,2-propanediol oxidoreductase [Escherichia coli HS]

-----  
-----  
-----MANRMILNETAWFG-RGAVGALTDEVKRRGYQKALIVTDKTLVQC  
GVVAKVTDKMDAAGLAWAIYDGVVNPNTITVVKEGLGVFQNSGADYLIAIGGGSPQDTCK  
AIGIISNNPEFADVRSLE----GLSPTNKPSVPILAIPTTAGTA-----  
---AEVTINYVITDEEKRRKFVCDPHDIPQV-----AFIDADM  
MDGMPPALKAAT-----GVDALTHAIEGYITR-GAW  
AL-----TDALHIKAIETIAGALRGSVA-----GDKDAGE-----EMALGQ  
YVAGMGFSNVG-----LGLVHGMAHPLGAFYNTF-----HGVA---NAILLPHVMR  
YNADFTGEKYRDIARV-----MGVKVEGMSLEEA-RNAAVEAVFVLRDVG  
IPPHLRDVGVRKED----IPALQAALN-DV-----CTGGNPREATLEDIVELYHTAW  
-----

>gi|77920438|ref|YP\_358253.1| alcohol dehydrogenase, class IV [Pelobacter carbinolicus DSM 2380]

-----  
-----  
-----MGAMAEQVYGGFFMPTTSLLG-NGAVKEIGNQAKVLGGTKALIVTDIGLVKL  
GMVDTLKGYLEQAGLQVAVFDGVEPNPTDVNVRDCLKVWQDNSCDLLVTFGGGSSHDCGK  
GMAIMATSG--GDIRDWA----GIDTLQANLPPYISINTTAGTA-----  
---SEMTRFAVVTNTDTHVKMVFCDARLTADV-----AINDPAL  
MVGLPPALTAAT-----GMDALTHAIEAYVTLLSN  
PI-----TDAVALQAIISLIGKWLKAVA-----NGADMEARD-----AMAYAE  
YLAGMAFNNSAG-----LGIVHSMHQPGSLLGKP-----HGVC---NAICLPVCE  
FNLMANAEKYAKVAEG-----LGEDISGLSVMEA-AEKAVAAIRRLSKDVG  
IPSGLAIEIGVTEKD----IPIMAENALN-DM-----CTLFNPRNVKVEDIIELYKKAL  
-----

>gi|28871422|ref|NP\_794041.1| alcohol dehydrogenase II [Pseudomonas syringae pv. tomato str. DC3000]

SupplementalMultipleSequenceAlign.txt

-----  
-----  
-----  
-----MSSTFFIPAVNIIG-AGCIDEAMLAIKRYGFLKALIVTDAGLAKA  
GVASQVAGLLVEQGIDSVVYDGARPNPTIANVENGLALLRKRQCDFVISLGGGSPHDCAK  
GIALCASNG--GHISDYE----GVDRSAKPQLPLIAINTTAGTA-----  
---SEMTRFCIITDEARHVKMAIIDRNVTPLL-----SVNDPNM  
MVAMPKSLTAAT-----GMDALTHAIEAYVST-AAT  
PI-----TDACALQAMSLIANNLREAVS-----NGTNITARE-----NMAYAQ  
FLAGMAFNNAS-----LGYVHAMAHQLGGFYDLP-----HGVC---NAVLLPHVQR  
FNASVSAARLTDVAHA-----MGASVRGLSPEEG-AHAAIEAIRALSAAVE  
IPAGLTALGVKEED----FPVLAANALK-DA-----CGFTNPRPADLEQIQELFRQAL

>gi|26249204|ref|NP\_755244.1| L-1,2-propanediol oxidoreductase [Escherichia coli CFT073]

-----  
-----  
-----  
-----MMANRMILNETAWFG-RGAVGSLTDEVKRRGYQKALIVTDKTLVQC  
GVVAKVIDKMDAAGLAWAIYDGVVNPNTITVVKLEGLDVFQNSGADYLIAIGGGSPQDTCK  
AIGIISNNPEFADVRSLE---GLSPTNKPSVPILAIPTTAGTA-----  
---AEVTINYVITDEEKRRKFVCVDPHDIPQV-----AFIDADM  
MDGMPPALKAAT-----GVDALTHAIEGYITR-GAW  
AL-----TDALHIKAIETIAGALRGSVA-----GDKDAGE-----EMALGQ  
YVAGMGFSNVG-----LGLVHGMAHPLGAFYNTP-----HGVA---NAILLPHVMR  
YNADFTGEKYRDIARV-----MGVKVEGMSLEEA-RNAAVEAVFALNRDVG  
IPPHLRDVGVRKED----IPALAQAALD-DV-----CTGGNPREATLEDIVELYHTAW

>gi|219855464|ref|YP\_002472586.1| hypothetical protein CKR\_2121 [Clostridium kluyveri NBRC 12016]

-----  
-----  
-----  
-----MSRGMVFNYSMFQCPRIIYG-EDAVDLTGAKSLKLGKRVLIVTGKHSSKKT  
GALDRVSDSLKKSGLLEYVIFDKVESDPSVNTVRLGVETAKEKNIDVIVALGGGSALDAAK  
AISMVSTNG--GDILDYE----KKAPEIEGPIVALPTTAGTG-----  
---SEVTKYSIITDTERKIKMLIGNDFLIPKV-----AILDPNL  
TKMMPPSVTAAT-----GMDAFTHAVEAYISK-AAQ  
PM-----CDVYAVKAIELITSNLIKAVL-----KEDDMEARS-----NMLLGQ  
MYAGLAFSNAS-----VALVHAMSRPLGAYYKVP-----HGLA---NALLLPEVMR  
FNRAACSEKFKFIAKT-----MGENIEGKSTREA-SYLAIESIKNLFSETG  
LPKSLKEVGVDKDN----FDKMAKDAVE-NK-----STTLNPRKPTLQQLIEIYETIY

>gi|215488116|ref|YP\_002330547.1| L-1,2-propanediol oxidoreductase [Escherichia coli O127:H6 str. E2348/69]

-----  
-----  
-----  
-----MMANRMILNETAWFG-RGAVGALTDEVKRRGYQKALIVTDKTLVQC  
GVVAKVTDKMDAAGLAWAIYDGVVNPNTITVVKLEGLGVFQNSGADYLIAIGGGSPQDTCK  
AIGIISNNPEFADVRSLE---GLSPTNKPSVPILAIPTTAGTA-----  
---AEVTINYVITDEEKRRKFVCVDPHDIPQV-----AFIDADM  
MDGMPPALKAAT-----GVDALTHAIEGYITR-GAW  
AL-----TDALHIKAIETIAGALRGSVA-----GDKDAGE-----EMALGQ  
YVAGMGFSNVG-----LGLVHGMAHPLGAFYNTP-----HGVA---NAILLPHVMR  
YNADFTGEKYRDIARV-----MGVKVEGMSLEEA-RNAAVEAVFALNRDVG  
IPPHLRDVGVRKED----IPTLAQAALD-DV-----CTGGNPREATLEDIVELYHTAW

>gi|153955023|ref|YP\_001395788.1| DhaT1 [Clostridium kluyveri DSM 555]

SupplementalMultipleSequenceAlign.txt

-----  
-----  
-----  
-----  
-----MNYSMFQCPRDIIYG-EDAVDLTGAKSLKLGKRVLIVTGKHSSKKT  
GALDRVSDSLKKSGLYVIFDKVESDPSVNTVRLGVETAKEKNIDVIVALGGGSALDAAK  
AISMVSTNG--GDILDYE-----KKAPEIEGPIVALPTTAGTG-----  
---SEVTKYSIITDTERKIKMLIGNDFLIPKV-----AILDPNL  
TKMPPSVTAAT-----GMDAFTHAVEAYISK-AAQ  
PM-----CDVYAVKAIELITSNLKAVL-----KEDDMERS-----NMLLQG  
MYAGLAFSNAS-----VALVHAMSRPLGAYYKVP-----HGLA---NALLLPEVMR  
FNRAACSEKFKFIKT-----MGENIEGKSTREA-SYLAIESIKNLFSETG  
LPKSLKEVGVDKDN----FDKMAKDAVE-NK-----STTLNPRKPTLGLIEIYETIY

>gi|91212167|ref|YP\_542153.1| L-1,2-propanediol oxidoreductase [Escherichia coli UTI89]

-----  
-----  
-----  
-----  
-----MMANRMILNETAWFG-RGAVGALTDEVKRRGYQKALIVTDKTLVQC  
GVVAKVIDKMDAAGLAWAIYDGVVNPNTITVVEGLDVFQNSGADYLAIGGGSPQDTCK  
AIGIISNNPEFADVRSLE---GLSPTNKPSVPILAIPTTAGTA-----  
---AEVTINYVITDEEKRRKFVCVDPHDIPQV-----AFIDADM  
MDGMPPALKAAT-----GVDALTHAIEGYITR-GAW  
AL-----TDALHIKAIETIAGALRGTVA-----GDKDAGE-----EMALGQ  
YVAGMGFSNVG-----LGLVHGMAHPLGAFYNTP-----HGVA---NAILLPHVMR  
YNADFTGEKYRDIARV-----MGVKVEGMSLEEA-RNAAVEAVFALNRDVG  
IPPHLRDVGVRKED----IPALAQALD-DV-----CTGGNPREATLEDIVELYHTAW

>gi|77919193|ref|YP\_357008.1| alcohol dehydrogenase, class IV [Pelobacter carbinolicus DSM 2380]

-----  
-----  
-----  
-----  
-----MAVVNLAETTYGFFIPSVTLMG-PGCAKEVGPKANELGAKKALLVTDAGLMKM  
GVADTIAGYIKDAGVEVVIYPGAEPNPTDKNVHDGVKVEDEGCDFFIVSLGGSSHDCAK  
GIGLVTAGG--GNIRDYE---GVNKSTVPMTPLIAINTTAGTA-----  
---SEMTRFCIITNLETHVKMAIVDWRCTPLI-----AVDDPVL  
MLGKPPALTAAT-----GMDALTHAVEAYVST-IAT  
PI-----TDACA EKAIRLIAEWRPAVA-----LGANIAARD-----AMCYAQ  
YLAGMAFNNAS-----LGYVHAMAHQLGGFYNLP-----HGVC---NAILLPAVCD  
YNMIACPDRFADIADF-----MGVPTEGLSVTEA-AAAGIEAIRELSASIG  
IPAGLTELNVKEED----LKTMAENAQK-DA-----CMLTNPRTATLDQVIDIYKAAM

>gi|118578993|ref|YP\_900243.1| iron-containing alcohol dehydrogenase [Pelobacter propionicus DSM 2379]

-----  
-----  
-----  
-----  
-----MALADQTFGFFIPSVTLG-LGCSKEAGEQAKALGATKLLIVTDAGLAKM  
GVADTIKGYVEAAGLQAAIYPGAEPNPTDKNVHDGVKAYQDNKCDGIISLGGSSHDCGK  
GIGLVIAGG--GNIRDYE---GVNKSTKVMPPFLAINTTAGTA-----  
---SEMTRFCIITNTDTHVKMAIVDWRVTPNI-----AIDDPLM  
MVGMPKLTAAAT-----GMDALTHAVEAYVSI-IAN  
PI-----TDACA IKAIELIAKNLSPAVA-----NGEDLVARD-----AMAYAE  
YLAGMAFNNAS-----LGYVHSMAHQLGGFYNLP-----HGVC---NAILL PVVSQ  
FNLIACPDRFADIAVA-----LGECIDGLSVTEA-GQKAIDRIKSLASASIG  
IPANLTELGVKEAD----LKIMSENAKK-DA-----CQLTNPRTATLDEVISIFKAAL

>gi|110806740|ref|YP\_690260.1| L-1,2-propanediol oxidoreductase [Shigella flexneri 5

str. 8401]

```

-----
-----
-----
-----MANRMILNETAWFG-RGAVGALTDEVKRRGYQKALIVTDKTLVQC
GVVAKVTDKMDAAGLAWAIYDGVVNPNTITVVKEGLGVFQNSGADYLIAIGGGSPQDTCK
AIGIISNNPEFADVRSLE---GLSPTNKPSVPILAIPTTAGTA-----
---AEVTINYVITDEEKRRKFVCVDPHDIPQV-----AFIDADM
MDGMPPALKAAT-----GVDALTHAIEGDITR-GAW
AL-----TDALHIKAIETIAGALRGSVA-----GDKDAGE-----EMALGQ
YVAGMGFSNVG-----LGLVHGMAHPLGAFYNT-----HGVA---NAILLPHVMR
YNADFTGEKYRDIARV-----MGVKVEGMSLEGA-RNAAVEAVFALNRDVG
IPPHLRDVGVRKED---ISALQAALD-DV-----CTGGNPREATLEDIVELYHTAW
-----

```

>gi|71735079|ref|YP\_276126.1| alcohol dehydrogenase II [Pseudomonas syringae pv. phaseolicola 1448A]

```

-----
-----
-----
-----MISTFFIPAVNIIG-TGCIDEAMLAIKRYGFLKALIVTDAGLAKA
GVASQVAGLLVEQGIDSVVYDGAKPNPTIANVENGLALLRERQCDFVISLGGGSPHCAK
GIALCASNG--GHISDYE---GVDRSAKPLPLIAINTTAGTA-----
---SEMTRFCIITDEARHVKMAIIDRNVTPLL-----SVNDPNM
MIAMPKSLTAAT-----GMDALTHAIEAYVST-AAN
PI-----TDACALQAMALIANNLRDAFT-----NGANITARE-----NMAYAQ
FLAGMAFNNAS-----LGYVHAMAHQLGGFYDLP-----HGVC---NAVLLPHVQR
FNASVSAARLTDVAHA-----MGCNIRGLSPQEG-AQAAIEAIRALSAAVE
IPAGLAVLGVKEED---FPILATNALK-DA-----CGLTNPRRADLEIQIIEIFRQAM
-----

```

>gi|110642940|ref|YP\_670670.1| L-1,2-propanediol oxidoreductase [Escherichia coli 536]

```

-----
-----
-----
-----MMANRMILNETAWFG-RGAVGSLTDEVKRRGYQKALIVTDKTLVQC
GVVAKVIDKMDAAGLAWAIYDGVVNPNTITVVKEGLDVFQNSGADYLIAIGGGSPQDTCK
AIGIISNNPEFADVRSLE---GLSPTNKPSVPILAIPTTAGTA-----
---AEVTINYVITDEEKRRKFVCVDPHDIPQV-----AFIDADM
MDGMPPALKAAT-----GVDALTHAIEGYITR-GAW
AL-----TDALHIKAIETIAGALRGSVV-----GDKDAGE-----EMALGQ
YVAGMGFSNVG-----LGLVHGMAHPLGAFYNT-----HGVA---NAILLPHVMR
YNADFTGEKYRDIARV-----MGVKVEGMSLEEA-RNAAVEAVFALNRDVG
IPPHLRDVGVRKED---IPALQAALD-DV-----CTGGNPREATLEDIVELYHTAW
-----

```

>gi|24373064|ref|NP\_717107.1| alcohol dehydrogenase II [Shewanella oneidensis MR-1]

```

-----
-----
-----
-----MAAKFFIPSVNVLG-KGAVDDAIGDIKTLGFKRALIVTDKPLVNI
GLVGEVAEKLQNGITSTVFDGVQPNPTVGNVEAGLALLKANQCDFVISLGGGSPHCAK
GIALVATNG--GSIKDYE---GLDKSTKPLPLVAINTTAGTA-----
---SEMTRFCIITDEARHIKMAIVDKHTTPII-----SVNDPEL
MLKKPASLTAAT-----GMDALTHAVEAYVSI-AAN
PI-----TDACAIKAIELIQGNLVNAVK-----QGQDIEARE-----QMAYAQ
FLAGMAFNNAS-----LGYVHAMAHQLGGFYDLP-----HGVC---NALLLPHVQE
YNAKVVPHRLKDIAKA-----MGVDVAKMTDEQG-AAAAITAIKTLSVAVN
IPENLTLGVKAED---IPTLADNALK-DA-----CGFTNPKQATHAEICQIFTNAL
-----

```

SupplementalMultipleSequenceAlign.txt

%% Pf12 [targeting tail implicated]

>gi++|150018873|ref|YP\_001311127.1| pyruvate formate-lyase [Clostridium beijerinckii NCIMB 8052]

-----  
-----  
-----  
-----  
-----  
-----  
-----MIS  
KGFSKPTERVE-----  
-----  
-----RLK-----RMI-VD-AIPY-VESERAVLV  
TESYKET-EGLSPI-----LR----RAKAVEKIFNNLPITIREL-ELVVGAITKN-PR  
STEICPEFS--YDWAKEFDT--MGARVAD--P-----  
---FQIPKETAELS--EAFKYW----DGKTTALADSY---MSQ-----  
-EAKDCM-----ANGVFTVGN--YFYGGV-----  
-----GHICVDYGKIL--RKGFKGIIAEVIEAMSKMDK-----KDPDYI---KKQQF  
YNAVVISYSAAINFAHRYAQKARDMAAAE-LNPTKRAELLQIAANCERVPENGATNFYEA  
CQSFWFIQIMVQIESNGHS--ISPRFDQYMYPYLKED-----KNISKEF-----AQEL  
VDCIWIKLND-INKT-RDEISAQAFAGYAVFQNLG---VGGQ-NE-EGL--DATNEISYM  
CMDATAHV-KLPAPSFIRVW-QGTPDEFLLRACEVAR-LGLGVPAMYN-DEVIIPALVN  
-----R-----G---VTLRDARNYCII-GCVE-----PQCPNK  
-TEG-W----HDAFFNV--AKVLEITLNGK-----VGNKQL-----GP-ITG  
DIT--TFKSIDDFYAAFQKQMEYFVYYLVEADNCVDYAHAERAPL--PFLSAMVDDCIGR  
GKSVQE----GGAIY-----NFTGPQ-AFGIADTGDSVYAIQKHVFEDKTI-EMDQLK--  
-----AALDANFG-----HTGVNTVSTSNNDVTEMQIYEAVKRILSNSGS  
IDISEIQSRISSEFTSPKTTVSGDFDNIRR-----  
-----LLES--TPCFGNDIDEVDMVARKCAQIYCFEV-EKY--TNP--R----  
--GGQFQAGVYVSA-NVLFGKDVAALPDGRLAKTPLAD-GVSPRAGKDCAGPTAAANS-  
-VAKLDH-FVASN-----GTLYNQKFLPSAVAGDTG--LQNFASVIRSYFD-  
---HKGMHVQFNVIDKQLLLDAQKHPENYKDLVVRVAGYSAQFTVLAKEVQDDIINRTE  
HSL-----

>gi++|83592239|ref|YP\_425991.1| pyruvate formate-lyase [Rhodospirillum rubrum ATCC 11170]

-----  
-----  
-----  
-----  
-----  
-----MIE  
KGFSKPTDRVM-----  
-----  
-----RLK-----NEI-LN-AKPY-VESERAVLV  
TEAYKET-EGL-PAI-----LR----RAKAAEKIFNNLPVTIRND-ELIVGAITKN-PR  
STEICPEFS--YDWVEKEFDT--MATRLAD--P-----  
---FLIPKETAKELH--DAFLYW-----PGKTTSDLASSY---MSQ-----  
-EAKDCI-----ASGVFTVGN--YFYGGV-----  
-----GHVCVDYGKVL--KIGFRGIITEVVQAMEKMDR-----MDPDYI---KKQQF  
YNAVIIAYTAAINFAHRYAAKALELAQNE-ANPTKRAELLQIAQNCARVPENGATTFYEA  
CQSFWFVQCLLQIESSGHS--ISPRFDQYMYPFLLCAD-----KSIDKGF-----AQEL  
VDCIWIKLND-VNKT-RDEVSAQAFAGYAVFQNLG---VGGQ-TE-GGL--DATNEISYM  
CMEATAHV-RLPAPSFIRVW-QGTPDDFLHRACEVVR-LGLGVPAMYN-DEVIVPALQN  
-----R-----G---VTLHDARNYGIV-GCVE-----PQCIHK  
-TEG-W----HDAFFNV--AKVLEITLNGK-----AGGK-QL-----GP-VTG  
EFT--SFRNMDDLAAAFQKQMYFVHYLVEADNCVDLAHGERCPL--PFVSALVDDCIGR  
GKSLQE----GGAIY-----NFTGPQ-AFGVADTGDSVYAIQKNVFEDKKI-TLAEMK--  
-----EALDANFG-----LPVGGAPSAGGDFTEEQVFAAVRKKVLSNGSMDVS  
ALKGEVYRTL SGQAAPAAGGSSTKYDAIRR-----  
-----LLDA--SPAFGNDIDDVDMVARECALIYCREV-EKY--TNP--R----  
--GGQFQAGIYVSA-NVLFGKDVAALPDGRLAKAPLAD-GVSPRPGQDVKGPTAAANS-  
-VAKLDH-FIASN-----GTLYNQKFLPSALAGDAG--LQNFASLVRSYFD-

SupplementalMultipleSequenceAlign.txt

----HKGMHVQFNVIDRQTL LDAQLEPEKHNDLVVRVAGYSAQFVFLAKEVQDDIISRTE  
QTL-----

>gi++|90422675|ref|YP\_531045.1| pyruvate formate-lyase [Rhodopseudomonas palustris  
B1SB18]

-----MIE  
KGFSKPTERVM-----

-----RLK-----NVI-LN-AKPF-VESERAVLV  
TDAYKET-EGL-PAI-----LR----RAKAAEKIFNNLPVTIRAD-ELIVGAITKR-PR  
STEICPEFS--FDWVEKEFET--MATRVAD--P-----  
---FQIPKETAELH--EAFKYW-----PGKTTSDLASSY---MSQ-----  
-EAKDCI-----AAGVFTVGN--YFYGGV-----  
-----GHVCVDYGKVL--KIGFRGIITEVVLAMEKLDL-----MDPGYI---KKQQF  
YNAVIISYTAAINFAHRYAVKAEELAQTE-SNATRKAELLQIAKNCARVPEYGASNFYEA  
QCSFWFLQALLQIESSGHS--ISPGRFDQYMYPFLLAAD-----KSIREF-----AQEL  
IDCIWIKLND-VNKT-RDGGSAQAFAGYAVFQNLG---VGGQ-TE-EGL--DATNDVSFM  
CMEATAHV-ALPAPSFSIRVW-QGTPDDFLYRACEVVR-LGLGVPAMYN-DEVIVPSLQN  
-----R-----G---VSLRDARDYGIV-GCVE-----PQAIHK  
-TEG-W----HDAAFFNV--AKVLEITLNGR-----VGDKQV-----GP-ASG  
ELL--SFRCIDDVFAAFQKQIEYFVRYLVEADNCVDLAHGERCPL--PFVSALVEDCIGR  
GKSLQE---GGALY-----NFTGPQ-AFGVADTGDSVYAIQKNVFEDKKI-TLSELK--  
-----AALDANFGRPVGES---AHADAGTNYTEEQVF-----  
-----AAVKKVLNSSGSTDVSAKKGKVVYALAGANGAKSG  
GASSSYDALHRLLEA---TPAFGNDIHEVDMVARRCAQIYCLEV-EKY--TNP--R----  
--GGQFQAGIYPVSA-NVLFGKDVAALPDGRFAKAPLAD-GVSPRQKDVNGPTAAANS-  
-VAKLDH-FIASN-----GTLYNQKFLPAALAGDSG--LQNFASLVRSYFD-  
----HKGMHVQFNVIDRQTL LDAQREPEKHNDLVVRVAGYSAQFVFLAKEVQDDIISRTE  
QTL-----

>gi++|26250357|ref|NP\_756397.1| hypothetical protein c4537 [Escherichia coli CFT073]

-----MLE  
KGFSNPTDRVV-----

-----RLR-----NMI-LT-AKPY-VESERAVLA  
TEAYKET-EQL-PAI-----MR----RAKVVKEKIFNQLPVTIRPD-ELIVGAVTIN-PR  
STEICPEFS--YDWEKEFET--MEHRIAD--P-----  
---FVIPKKAQELH--EAFKYW-----PGKTTALAASY---MSE-----  
-GTKESM-----ASGVFTVGN--YFFGGV-----  
-----GHVSVDYGKVL--KIGFRGIINEVSRALSLDR-----TEPGYI---KKEQF  
YNAVLISYNAAIRFAHRYAEEASRLAQE-SNPTRKRELEQIAQNCTRVPEYGATTFWEA  
CQTFWFIQSMLQIESSGHS--ISPGRFDQYMYPYLES-----KSIREF-----AQEL  
VDCCWIKLND-INKT-RDEVSAQAFAGYAVFQNLG---CGGQ-TE-DGR--DATNDLSYM  
CMEATAHV-RLPQPSFSIRVW-QGTPDEFYLRACELVR-MGLGVPAMYN-DEVIIPALQN  
-----R-----G---ISLRDARDYCII-GCVE-----PQAPHR  
-TEG-W----HDAAFFNV--AKVLEITLNGR-----VGNKQL-----GP-VTG  
ELT--QFTSMEDFYTAFQKQMAHFVHQLVEACNSVDIAHGERCPL--PFLSALVDDCIGR  
GKSLQE---GGAIY-----NFTGPQ-AFGVADTGDSVYAIQKQVFEDRKL-SLSELK--  
-----SALDANFG--YPVGANPHTPAAKSSLNEQDIY-----  
-----DVVKRIIEQHGDPAAIKNEVYRQLTSGSAAPVQ  
SGTMSRHEEIRRILEN--TPCFGNDIDVDLVARKCALIYCQEV-EKY--TNP--R----  
--GGQFQAGIYPVSA-NVLFGKDVAALPDGRLAKEPLAD-GVSPRQKDTLGPTAAANS-  
-VAKLDH-FIASN-----GTLYNQKFLPSSLAGENG--LRNFSGLIRHYFD-  
----KKGGMHVQFNVIDRNTLIEAQKNPEQHQLVVRVAGYSAQVWVFLAKEVQDDIISRTE  
QQLS-----

>gi++|28211126|ref|NP\_782070.1| formate acetyltransferase 2 [Clostridium tetani E88]

-----  
-----  
-----  
-----  
-----MDIREFSNMLMEATKNMSDEERNGLMNMFQISISKEIKKEEKVTSNVVFNNG  
EIPDGMTERLI-----

-----KLN-----ENY-MK-QVPS-ITTHRARAI  
TKIAKEN-PGV-PKS-----VL-----RGKCFKYCETAPLVIQDN-ELIVGAPNGK-PR  
AGAFSPDIA--WRWMEDEIDT---IANRPQD--P-----  
---FYISEEDKKIMR-EELFPYW-----KGKSVDEYCEDQ---YRE-----  
-AGVWEL-----SGESFVSDCSY--HAVNGG-----  
-----GDSNPGYDVILM-KKGMLDIKREAEKLASLSY-----ERPEDI---EKIYF  
YKSIIDTAEGVMYAKRMSDYAAELAAKE-TDPKRKAELQKISKVNARVPAHKPSTFWEA  
IQAVWTIESLLVVEENQTG--MSIGRVDQYMPFYKSDIE-S--GRMTDFE-----AFEL  
AGCMLIKMSE-MMWI-TSEGGSKFFAGYQPFVNMC---VGGV-TR-EGR--DATNELTYL  
LMDAVRHV-KIYQPSLACRIH-KGSPQKYLKKIVDVIR-AGMGFPACHF-DDVHIKMMLA  
-----K-----G---VSIEDARDYCLM-GCVE-----PQKSGR  
-LYQ-W---TSTGYTQW--PICIELVLNHGV---PLWYGK-QV-----CP-DMG  
DLS--QFKTYEQFEGAVREIKYITKWTAVATTISQRVHRELAPK--PLMSMMYEGCMEK  
GRGVEA---GGAMY-----NFGPGVWVWSGLATYTDSMAAIKLLVFEKKY-TLEELS--  
-----EALKADFV-----G-Y-----

-----ERLRK-----  
-----DCLE--APKYGNDDDYADYIAADLVNFTEQEH-RKY--KTL-----  
--YSVLSHGTLISISN-NTPFGQMTGATANGRRAMPLSD-GISPSQGSDFKGPSTSIKS-  
-VSKISC-EDMNI-----GMVHNFKLMSGLLDTPEG--EQGIALLRSACA-  
----LQLGEIQFNLYLDNETLIEAQKHPEQYRDLIVRVAGYSAFFVELCKDVQDEIISRTM  
LTHF-----

>gi++|150391563|ref|YP\_001321612.1| formate C-acetyltransferase [Alkaliphilus  
metalliredigens QYMF]

-----  
-----  
-----  
-----  
-----MNIREFSIKFVEATKNMSEEERNALKKIFQGITQEIPKEDTDISLYRENHQ  
GIPTGITERLK-----

-----TLK-----DNY-LK-WKPS-ISIHRARAI  
TKIAKEN-PGM-PKI-----LL-----RAKSFYRCETAPLVIQDH-ELIVGAPCGA-PR  
AGAFSPDIS--WRWLEELDT---IANRSQD--P-----  
---FYISEEDKKELV-EEIFPYW-----KGKSVDEHSEDQ---FRE-----  
-AGVWEI-----SGESFVSDCSY--HALNGG-----  
-----GDSNPGYDVILM-KKGMLDIQEEAKEKLNELSY-----ENPEDI---EKIYF  
YKSVIQTTEGVMYARRLSEYAMELAQKE-SNPNRKAELMKIAEVNKRVPAAHKPNNFWEA  
IQSVWTVESLLVVEENQTG--MSIGRVDQYMHPFFEQDLK-N--GNLSEYE-----AFEL  
AGSMLIKMSE-MMWL-TSEGGSKFFAGYQPFINMC---VGGV-TR-EGL--DATNDLTYL  
LMDAVRHV-KIYQPSLATRIH-SKSPKKYLRKIVDVVR-SGMGFPACHF-DDVHIKMMLA  
-----K-----G---VSIEDARDYCLM-GCVE-----PQKSGR  
-LYQ-W---TSTAYTQW--PICIELALNNGI---PLWYGK-KV-----CP-DTG  
DVD--GFASYEDFEKAVKEQINYITKLSSIAITVITQRVHRELAPK--PLMSIMYEGCMEK  
GKDVS---GGAMY-----NFGPGVWVWSGLATYVDSMAAIKLLVFEKKY-TFKQLN--  
-----EALNKDFE-----G-H-----

-----EELRN-----  
-----DCLK--APKYGNDDDYADLIAVDLVNYTENEH-RKY--KTL-----  
--YSVLSHGTLISISN-NTPFGQLTGASANGRKAWAPLSD-GISPTQGADFKGPATIKS-  
-VSKMAC-DNMNI-----GMVHNFKLMSGLLDTPEG--EEGIVTLLRTASM-  
----LGVGEMQFNLYLDNETLIKAQKNPEQYRDLIVRVAGYSAFFVELCKDVQDEIISRTM  
LTKI-----

>gi++|188587680|ref|YP\_001920768.1| formate C-acetyltransferase [Clostridium  
botulinum E3 str. Alaska E43]

SupplementalMultipleSequenceAlign.txt

-----MDIREFSNKFVEATQNMSAEERECLMKIFEGVSKEITKEEPVLEHVVCTEGD  
KIPDGITQRLL-----

-----KLLK-----ENY-LK-QVPS-ITTYRARA  
TKIAKEN-PGM-PKI-----LL-----RAKCFKYCCETAPLVIQDN-ELIVGAPCGA-PR  
AGAFSPDIA--WRWMVDEIDT--IGTRAQD--P-----  
---FYISEEDKKIMR-EELFPYW-----AGKSVDEYCNQ---YRE-----  
-AGVWEL-----SGESFVSDCSY--HAINGG-----  
-----GDSNPGYDVILM-KKGMLDIQLEAKEHLEKLDY-----ENPEHI---EKIYF  
YKAIIDTTEGVMIIYAKRLSKYAAELAEKE-TNPKRKLELQKISEINARVPAHKPSTFWEA  
IQAVWTIESLLVVEENQTG--MSIGRVDQYMYEYKNDIE-S--GRMNDFE-----AFEL  
SGCMLIKMSE-MMWI-TSEGGSKFFAGYQPFVNMCM---VGGV-DR-QGR--DATNELTYL  
LMDAVRHV-KIYQPSLACRIH-NQSPQKYLKKIVDVIR-AGMGFPACHF-DDVHIKMMLA  
-----K-----G-----VSIEDARDYCLM-GCVE-----PQKSGR  
-LYQ-W----TSTAYTQW--PICIELVLNNGI---PLWYEK-QV-----CP-NMG  
DIN--SFKNYEEFESAVKEQIKYITKWT SVATVISQRVHKELAPK--PLMSIMYEGCMDN  
GRGVEA----GGAMY-----NFGPGVIWSGLATYTDSMAAIKLVFEEKY-TLQELN--  
-----EALKADFV-----G-Y-----

-----EKLK-----  
-----DCLE--APKYGNDDYADYIAADLINFTELEH-RKF--KTL-----  
--YSVL SHGTL SISN-NTPFGQLTGATANGRRAMPLSD-GISPSQGS DYKGP TAIKS-  
-VSKMSC-DSMNI-----GMVHNFKLISGLLDTKEG--EDGIITLLRSACV-  
----LGLGEVQFN YLDNDTLIEAQKHPEQYRDLIVRVAGYSAFFVELCKDVQDEIISRTM  
LTHF-----

>gi++|187932408|ref|YP\_001885647.1| formate C-acetyltransferase [Clostridium  
botulinum B str. Eklund 17B]

-----MDIREFSNKFVEATQNMSAEERECLMKIFEGVSKEITKEEPVLEHVVCTEGD  
KIPDGITQRLL-----

-----KLLK-----ENY-LK-QVPS-ITTYRARA  
TKIAKEN-PGM-PKI-----LL-----RAKCFKYCCETAPLVIQDN-ELIVGAPCGA-PR  
AGAFSPDIA--WRWMVDEIDT--IGTRAQD--P-----  
---FYISEEDKKIMR-EELFPYW-----AGKSVDEYCNQ---YRE-----  
-AGVWEL-----SGESFVSDCSY--HAINGG-----  
-----GDSNPGYDVILM-KKGMLDIQLEAKEHLEKLDY-----ENPEHI---EKIYF  
YKAIIDTTEGVMIIYAKRLSKYAAELAEKE-TNPKRKSELQKISEINARVPAHKPSTFWEA  
IQAVWTIESLLVVEENQTG--MSIGRVDQYMYEYKNDIE-S--GRMNDFE-----AFEL  
SGCMLIKMSE-MMWI-TSEGGSKFFAGYQPFVNMCM---VGGV-DR-QGR--DATNELTYL  
LMDAVRHV-KIYQPSLACRIH-NQSPQKYLKKIVDVIR-AGMGFPACHF-DDVHIKMMLA  
-----K-----G-----VSIEDARDYCLM-GCVE-----PQKSGR  
-LYQ-W----TSTAYTQW--PICIELVLNNGI---PLWYEK-QV-----CP-NMG  
DIN--SFKNYEEFESAVKEQIKYITKWT SVATVISQRVHKELAPK--PLMSIMYEGCMDN  
GRGVEA----GGAMY-----NFGPGVIWSGLATYTDSMAAIKLVFEEKY-TLQELN--  
-----EALKADFV-----G-Y-----

-----EKLK-----  
-----DCLE--APKYGNDDYADYIAADLINFTELEH-RKF--KTL-----  
--YSVL SHGTL SISN-NTPFGQLTGATANGRRAMPLSD-GISPSQGS DYKGP TAIKS-  
-VSKMSC-DSMNI-----GMVHNFKLISGLLDTKEG--EDGIITLLRSACV-  
----LGLGEVQFN YLDNDTLIEAQKHPEQYRDLIVRVAGYSAFFVELCKDVQDEIISRTM  
LTHF-----

>gi++|160879563|ref|YP\_001558531.1| formate C-acetyltransferase [Clostridium  
phytofermentans ISDg]



SupplementalMultipleSequenceAlign.txt

-----MDIREFSNKFVEATKNMSPEERSLMMKFETVSDEINKKETAPSTSNVCNEEGS  
NIPDGITPRLH-----

-----KLK-----ENY-LT-HKPT-ITTYRARAI  
TKIAKEN-PGM-PKI-----ML-----RAKCFRYCCETAPLVIQDN-ELIVGAPCGA-PR  
AGAFSPDIA--WRWMVDEIDT---IGTRPQD--P-----  
---FYISEEDKKIMK-EELFPFW-----AGKSVDEYCEDQ---YRE-----  
-AGVWEL-----SGESFVSDCSY--HAINGG-----  
-----GDSNPGYDVILM-KKGMLDIQQEAKDHLKELDY-----ENPDDI---EKIYF  
YKSIIDTTEGVMIYAKRLSEYAAELAAKE-TNPKRKEELLKISEVNAYVPAHKPRTFWEA  
IQAVWTIESLLVVEENQTG--MSIGRVDQYMPFYKDDIE-S--GRMNDYQ-----AFEL  
AGCMLIKMSE-MMWI-TSEGGSKFFAGYQPFVNMC---VGGV-TR-SGR--DATNDLTYL  
LMDAVRHV-KIYQPSLACRIH-NKSPKEYLKKIVDVVR-SGMGFPACHF-DDAHIKMMLA  
-----K-----G---VSIEDARDYCLM-GCVE-----PQKSGR  
-LYQ-W----TSTAYTQW--PICIELVLNNGV---PLWYGK-QV-----CP-DMG  
ALS--NFKTYEEFEAAVKEQIKYITKWSDVATVISQRIHRDLAPK--PLMSIMYEGCMES  
AKDVSA----GGAMY-----NFGPGVWWSGLATYSDSMAAIKKLVFDEKKY-TLEQLN--  
-----EALKADFA-----G-Y-----

-----DQIRT-----  
-----DCLN--APKYGNDDDYADLIAADLVDFTEHEH-RKY--KTL-----  
--YSILCHGTLISISN-NTPFGQLTGASANGRHAWLPLSD-GISPTQGADFNPTAIKS-  
-ISKMAN-DSMNL-----GMVHNFKIMSGLLDTPEG--EESLITLLRTACM-  
----FGNGEMQFNLYLDNNTLIDAQKHPEKYRDLIVRVAGYSAFFIELCKDVQDEIISRTM  
LTHF-----

>gi++|158321419|ref|YP\_001513926.1| formate C-acetyltransferase [Alkaliphilus  
oremlandii OhILAs]

-----MILDIRDFSNKLTEATKNLSVEERMSLMKIFEGISNEITKKDGTCPAYRSEEGT  
GVPNGITERLS-----

-----RLK-----ETY-LK-WQPT-ITTHRARAI  
TKIAKEN-PGM-PKV-----LL-----RAKSFYCCETAPLLIQED-ELIVGAPCGQ-PR  
AGAFSPDIA--WRWMEDEIDT---IGNRPQD--P-----  
---FYISEEDKRYMR-EELFPFW-----KGKSVDEYCEDQ---YRD-----  
-AGVWEI-----SGESFVSDCSY--HALNGG-----  
-----GDSNPGYDVILM-KKGMLDIQKEAQEHLEKLSY-----DNPDDI---EKIYY  
YKAVIETTEGVMIYARRLADHAADLAAKE-TNPKRKAELQRRISEINRRVPANKPSTFWEA  
IQAVWTIESLLVVEENQTG--MSIGRVDQYMPFYKADIE-S--GRMTEFE-----AFEL  
AGAMLIKMSE-MMWV-TSEGGSKFFAGYQPFVNMC---VGGV-TR-EGL--DATNDLTYL  
LMDAVRHV-KIYQPSLATRIH-SKSPKKYLKKIVDVVR-SGMGFPACHF-DDVHIKMLLA  
-----K-----G---VSIEDARDYCLM-GCVE-----PQKSGR  
-LYQ-W----TSTAYTQW--PIAIELVLNNGV---PLWYGK-QV-----TP-NMG  
DIN--QYKTYEQFEAAVKEIQYITKLSNIATVISQRVHRDLAPK--PLMSIMYEGCMES  
GKDVSA----GGAMY-----NFGPGVWWSGLATYVDSMAAIKKLVFDDKKY-TLQQLN--  
-----EALKADFV-----G-Y-----

-----DQVKS-----  
-----DCLK--APKYGNDDDYVDLIAADLVNFTEKEH-RKY--RTL-----  
--HSIMCHGTLISISN-NTPFGQLTGATANGRAWTPLSD-GISPTQGADFKGPTAIKS-  
-VSKMAC-DNMNL-----GMVHNFKLIAGLLDTPEG--EEGIITLLRTANN-  
----IGIGEMQFNLYLDNNTLLEAQKHPEKYRDLIVRVAGYSAFFVELCKDVQDEIISRTM  
LTHF-----

>gi++|170760633|ref|YP\_001787508.1| formate acetyltransferase [Clostridium botulinum  
A3 str. Loch Maree]

SupplementalMultipleSequenceAlign.txt

-----MDIREFSNKFMEATKNMSDEERAGLMKMFQSVSNEITKEEPATLKVACDNNG  
EIPDGMTERLV-----

-----KLK-----ETY-LK-HVPT-ITTHRARAI  
TKIAKEN-PGT-PKS-----VL-----RGKCFKHCCETAPLVIQDN-ELIVGAPNGQ-PR  
AGAFSPDIA--WRWMVDEIDT---IGTRPQD--P-----  
---FYISEEDKKIMR-EELFPYW-----AGKSVDEYCEDQ---YRE-----  
-AGVWEL-----SGESFVSDCSY--HAVNGG-----  
-----GDSNPGYDVVLM-KKGMLDIKREAEKLAELKY-----ENPEDI---DKIYF  
YKSLIDTAEGVMIYAKRMSDYAAELAQKE-TNPKRKAELQKISEINARVPAHKPSTYWEA  
IQAVWTIESLLVVEENQTG--MSIGRVDQYMPFYKADIE-A--GRMTDYE-----AFEL  
SGCMLIKMSE-MMWI-TSEGGSKFFAGYQPFVNMCM--VGGV-TR-EGR--DATNELTYL  
LMDAVRHV-KIYQPSLACRIH-KSSPQKYLKKIVDVIR-AGMGFPACHF-DDVHIKIMLA  
-----K-----G---VSIEDARDYCLM-GCVE-----PQKSGR  
-LYQ-W---TSTGYTQW--PICIELVLNNGV---PLWYGK-QV-----CP-DMG  
DLS--QFKTYEQFEAAVKEQIKFITKWTSVATVISQRVHKELAPK--PLMSMMYEGCMEN  
GRGVEA---GGAMY-----NFGPGVVWSGLATYADSMIAIKKLVFEEKKY-TLQEMN--  
-----EALKADFV-----G-Y-----

-----EQLRK-----  
-----DCLE--APKYGNDDDYADLITADLINFTEQEH-RKY--KTL-----  
--YSVLSHGTLISISN-NTPFGQMTGATANGRRAMPLSD-GISPSQGADFKGPTSIKS-  
-VSKMSC-EDMNI-----GMVHNFKLIAGLLDTKEG--EQGIITLLRSACA-  
----LQLGEVQFNLYDNKTLIEAQKHPDQYRDLIVRVAGYSAFFVELCKDVQDEIISRTM  
LTHF-----

>gi++|148380073|ref|YP\_001254614.1| formate acetyltransferase [Clostridium botulinum  
A str. ATCC 3502]

-----MDIREFSNKFMEATKNMSDEERAGLMKMFQSVSNEITKEEPATSKVACDNNG  
EIPDGMTERLV-----

-----KLK-----ETY-LK-HVPT-ITTHRARAI  
TKIAKEN-PGT-PKS-----VL-----RGKCFKHCCETAPLVIQDN-ELIVGAPNGQ-PR  
AGAFSPDIA--WRWMVDEIDT---IGTRPQD--P-----  
---FYISEEDKKIMR-EELFPYW-----AGKSVDEYCEDQ---YRE-----  
-AGVWEL-----SGESFVSDCSY--HAVNGG-----  
-----GDSNPGYDVVLM-KKGMLDIKREAEKLAELKY-----ENPEDI---DKIYF  
YKSLIDTAEGVMIYAKRMSDYAAELAQKE-TNPKRKAELQKISEINARVPAHKPSTYWEA  
IQAVWTIESLLVVEENQTG--MSIGRVDQYMPFYKADIE-A--GRMTDYE-----AFEL  
SGCMLIKMSE-MMWI-TSEGGSKFFAGYQPFVNMCM--VGGV-TR-EGR--DATNELTYL  
LMDAVRHV-KIYQPSLACRIH-KSSPQKYLKKIVDVIR-AGMGFPACHF-DDVHIKIMLA  
-----K-----G---VSIEDARDYCLM-GCVE-----PQKSGR  
-LYQ-W---TSTGYTQW--PICIELVLNNGV---PLWYGK-QV-----CP-DMG  
DLS--QFKTYEQFEAAVKEQIKFITKWTSVATVISQRVHKELAPK--PLMSMMYEGCMEN  
GRGVEA---GGAMY-----NFGPGVVWSGLATYADSMIAIKKLVFEDKKY-TLQEMN--  
-----EALKADFV-----G-Y-----

-----EQLRK-----  
-----DCLE--APKYGNDDDYADLIAADLINFTEQEH-RKY--KTL-----  
--YSVLSHGTLISISN-NTPFGQMTGATANGRRAMPLSD-GISPSQGADFKGPTSIKS-  
-VSKMSC-EDMNI-----GMVHNFKLIAGLLDTPEG--EQGIITLLRSACA-  
----LQLGEVQFNLYDNKTLIEAQKHPDQYRDLIVRVAGYSAFFVELCKDVQDEIISRTM  
LTHF-----

>gi++|170757740|ref|YP\_001781665.1| formate acetyltransferase [Clostridium botulinum  
B1 str. Okra]

SupplementalMultipleSequenceAlign.txt

-----MDIREFSNKFMEATKNMSDEERAGLMKMFQSVSNEITKEEPATSKVACDNG  
EIPDGMTERLV-----

-----KLLK-----ETY-LK-HVPT-ITTHRARAI  
TKIAKEN-PGT-PKS-----VL-----RGKCFKHCCETAPLVIQDN-ELIVGAPNGQ-PR  
AGAFSPDIA--WRWMVDEIDT---IGTRPQD--P-----  
---FYISEEDKKIMR-EELFPYW-----AGKSVDEYCEDQ---YRE-----  
-AGVWEL-----SGESFVSDCSY--HAVNGG-----  
-----GDSNPGYDVVLM-KKGMLDIKREAEKLAELKY-----ENPEDI---DKIYF  
YKSLIDTAEGVMIYAKRMSDYAAELAQKE-TNPKRKAELQKISEINARVPAHKPSTYWEA  
IQAVWTIESLLVVEENQTG--MSIGRVDQYMYPFYKADIE-A--GRMTDYE-----AFEL  
SGCMLIKMSE--MMWI-TSEGGSKFFAGYQPFVNMCM--VGGV-TR-EGR--DATNELTYL  
LMDAVRHV-KIYQPSLACRIH-KSSPKYLKKIVDVIR-AGMGFPACHF-DDVHIKIMLA  
-----K-----G---VSIEDARDYCLM-GCVE-----PQKSGR  
-LYQ-W----TSTGYTQW--PICIELVLNNGA---PLWYGK-QV-----CP-DMG  
DLS--QFKTYEQFEAAVKEQIKFITKWTSVATVISQRVHKELAPK--PLMSMMYEGCMEN  
GRGVEA----GGAMY-----NFGPGVVWSGLATYADSMIAIKKLVFEDKKY-TLQEMN--  
-----EALKADFV-----G-Y-----

-----EQLRK-----  
-----DCLE--APKYGNDDDYADLIAADLINFTEQEH-RKY--KTL-----  
--YSVLSHGTLISISN-NTPFGQMTGATANGRRAMPLSD-GISPSQGADFKGPTSIKIS-  
-VSKMSC-EDMNI-----GMVHNFKLISGLLDTPEG--EQGIITLLRSACA-  
----LQLGEVQFNLYDNKTLIEAQKHPEQYRDLIVRVAGYSAFFVELCKDVQDEIISRTM  
LTHF-----

>gi++|51245675|ref|YP\_065559.1| pyruvate formate-lyase 2 [Desulfotalea psychrophila Lsv54]

-----MDLQSFSEKLIVATKLNLAERASLKKIFDGDSTEIAEDKNVPSAHLVSDPC  
AIPNGPTDRHI-----

-----KLLK-----KKF-LT-HVPT-ITTHRARAI  
TKIAQEN-PGL-PAK-----IL-----RGKSFKYCCETAPLVIQDN-ELIVGSPCGA-PR  
AGAFSPDIA--WRWKDELDT---IGTRPQD--P-----  
---FFISEEDKKIMR-EELFPFW-----EGRSIDEYCEQQ---YRE-----  
-AGMWEL-----SGESYVTDCSY--HATNGG-----  
-----GDSNPGYDVILM-KKGMLDIVRESQEKLAEALDY-----ENPDDM---DKIYF  
YKSLIDTAEGVMIYAKRLSDYAAQLAASE-KDPQRKAELKISAVNARVPAHKPETYWEA  
IQAVWTVESLLVVEENQTG--MSIGRVDQYMYPFYKADIE-A--GRMTEYE-----AFDL  
SGCLLVKCESE--MMWI-TSEDASKFFAGYQPFVNMCM--LGGV-TR-EGL--DATNDLTYL  
LMDAVRHV-KVYQPSVSTRVH-NQSPQKYLKKIVDVIR-AGMGFPPIHF-DDAHIKIMLA  
-----K-----G---CSIEDSRDYCLM-GCVE-----PQKSGR  
-LYQ-W----TSTAYTQW--PICIEMALNHGV---PLWYGK-QV-----CP-DLG  
ALE--SFDTYEKFDAAVKEQIKYVTKWTSVGTVISQRIHRDLAPK--PLMSMMYEGCMES  
GKDVSA----GGAMY-----NFGPGVVWSGLATHADSMIAIKKLVFDDKKY-SLTQLN--  
-----EALKAEFK-----G-Y-----

-----DQLKA-----  
-----DCLA--APKFGNDDDYADLIVNDLVNFTEREH-RKF--KTL-----  
--YSVLSHGTLISISN-NTPFGQLLGASANGRDAMPLSD-GISPTQGADFKGPTAIKIS-  
-VSKMPT-DSMNI-----GMVHNFKLMSGLLDTPEG--ENGIITLIRTASM-  
----MNGNGEMQFNLYDNNTLLDAQLHPEKYRDLVVRVAGYSAFFVELCKDVQDEIISRTM  
LTEI-----

>gi++|89893162|ref|YP\_516649.1| pyruvate-formate lyase [Desulfitobacterium hafniense Y51]

SupplementalMultipleSequenceAlign.txt

-----MSTCCLSPHEERIIDPQKG  
KVNYEGRERVF-----

-----KIL-----ESF-QD-LRPK-IDVERAKYF  
TESFKAT-EGQ-PLQ-----PR-----WAKALMHIAQNITVYIDDQ-QLIVGRAGA-Q-GR  
YGIVFPELD--GDFLGLAIEQ---LPQRVES--P-----  
---FNIDPDDAQIII-NDVAPYW----KGKTFHEELAKA---LPE-----  
-DTLKVT-----YDPADPLASRFIVNET--ASFRSS-----  
-----IQVHVDYEVKVL--KRGFKGIKEEAQAKLDQLDPL-----SPADNM---EKRPF  
LEAVIITCDIAIVVWANRHAHLAAQMAKLE-KDPQRKQELSDIAERCAWVPEHPARNFREA  
VQSQWFVQMFSTRIEQKTGTI-ISNGRMDQYFYPYQKQDVA-E--GILTPQQ-----AIEL  
LECMWVGMAQ-FIDLKLSPTGGAFNEGAYHWEAVT---VGGQ-TP-DGV--DATNELTYL  
FLESKQKF-PLNYPDLAARIH-SRSPERYLYEVAETVK-EGTGFPKLIIN-DEEVVPLLLS  
-----K-----G---AKFAEALDYAVS-GCAE-----CRMPNR  
DTYT-----SGNPYINF--AAAIEMTLYNGR---MLKYGDEQL-----GL-ETG  
DPT--QFETWDEFWKAYLAQQTNFKHAFIQQHIIIRLRAQHFAS--PLGSLMHDLCMEN  
CLDLHQPVKGGI-----DLGYFE-LIGYGTVVDSLAAIKKLVYEEKKL-TMAELL--  
-----EAVRNNFE-----G-H-----

-----EVIRE-----  
-----MVMH--TPKYGNNDPYSDVIAKEVDRTAVEFT-KKYS-REL-----  
--GVHLDLRLVPFTS-HVPFGKVVSATPNGRKAWMPLAD-GSSASHGADVNGPTAVLLSN  
FFSKNYG-YRNRA-----ARLLNIKLSPSCVAGEEG--SEKLVSFIRTWCD-  
----LKLWHIQFNIVNRETLAQAQDPKYRGLIVRVAGYSAYFVDLSSDLQDDIIARTE  
HEML-----

>gi++|220904625|ref|YP\_002479937.1| Formate C-acetyltransferase [Desulfovibrio  
desulfuricans subsp. desulfuricans str. ATCC 27774]

-----MDLHDFSSKIAEVTKNLSPEEREQLRKIFATVTPLPAQSAPSAAAQPSAAHSGP  
GVPEGPTQRHV-----

-----LLK-----ENY-LK-QVPR-ITIHARTI  
TKIDKEN-PGM-PRI-----LL-----RATAFRHCCESAPLIQDH-ELIVGAPNGA-PR  
AGAFSPEIS--WRWLRDELDT---IDSRAQD--P-----  
---FHLAEEDKKILC-EEIFPYW----AGKSVDEYCEAQ---YRE-----  
-AGLWEL-----SGESYVSDCSY--HALNGG-----  
-----GDSNPGYDVILM-KKGMLDIQREAREHLEQLSY-----DRPEDI---DKIYF  
YKSVIETTEGVMYIYARRMSEYAAQLAARE-NDPRRKAELLKIAEVNARVPAHAPTTFWEA  
IQAVWTVESLLVVEENQTG--MSIGRVDQYMPFYKADIE-A--GRMTPYE-----AFDL  
AGCMLIKMSE-MMWL-TSEGSSKFFAGYQPFVNMCM--VGGV-SR-EGR--DATNDLTYL  
LMDAVRHV-RIYQPSLATRVH-NTSPQEYLLKIVSVIR-SGMGFPAVHF-DDTHIKMMLA  
-----K-----G---VDIEDARDYCLM-GCVE-----PQKSGR  
-LYQ-W----TSTAYTQW--PICIELVLNRGV---PLWYGK-QV-----CP-DLG  
DLS--QFDTFEKFDAAVKEQIRYITKWSSVATVISQRVHRDLAPK--PLMSIMYEGCMEK  
GRDVAA---GGAMY-----NFGPGVIWSGLATYADSMAAIKKLVYDDRKY-TLQQLN--  
-----EALKANFE-----G-Y-----

-----DAILA-----  
-----DCLA--APKYGNDDDYADDIAADLIAFTEREH-RKY--RTL-----  
--YSILSHGTLISISN-NTPFGQLLGASAGGRKAWQPLSD-GISPTQGADYKGPATAIIS-  
-VSKMSN-DNMNI-----GMVHNFKLMPLLDTPPEG--EQGIITLIRSASI-  
---LGNQEMQFNLYDNKTMLEAQNPCKDYRDLVVRVAGYSAFFVELCKDVQDEIISRTV  
LRHF-----

>gi++|78358322|ref|YP\_389771.1| formate C-acetyltransferase [Desulfovibrio  
desulfuricans subsp. desulfuricans str. G20]

SupplementalMultipleSequenceAlign.txt

-----MDLQDFSHKLAEATKNLTPAERASLKKIFEGVSAEVFSQPAPVSAVATGAES  
GIPDGPTPRHV-----

-----KLLK-----ENF-LK-QVPS-ITVQRAVAI  
TKIAKEN-PGL-PKP-----LL----RAKTFRYCCETAPLVIQDH-ELIVGSPNGA-PR  
AGAFSPEVA--WRWLQDELDT---IGSRPQD--P-----  
---FYISEEDKKVLR-EEVFPFW-----QNKSVDEFCEGQ---YRE-----  
-ADLWEM-----SGESFVSDCSY--HAVNGG-----  
-----GDSNPGYDVILM-KKGMLDIQREAREKLEQLDY-----ANPEDI---DKIYF  
YKSVIETAEGVMIYARRLSAYAAELAARE-TDPRRKAELQKISEVNARVPAHAPSNFWEA  
IQAVWTVESLLVVEENQTG--MSIGRVDQYMYPPFYRADID-S--GRLTEYE-----AFDL  
AGCMLVKMSE-MMWI-TSEGASKFFAGYQPFVNMCM--VGGV-TR-EGH--DATNDLTYM  
LMDAVRHV-RIYQPTLATRVH-NKSPQKYLKKIVDVIR-SGMGFPAVHF-DDAHIKMMLA  
-----K-----G---VSIEDARDYCLM-GCVE-----PQKSGR  
-LYQ-W---TSTGYTQW--PICIELVLNHGV---PLWYGK-KV-----TP-DMG  
DLS--QYDTEYKFEAAVKEQIRWITKNTSVATVISQRAHRELAPK--PLMSLMYEGCMES  
GRDVSA---GGAMY-----NFGPGVWVWSGLATYVDSMAAIKLVYDDRKY-TLAQLN--  
-----EALKADFA-----G-Y-----

-----DQILA-----

-----DCLA--APKYGNDDYADMIAADLVHFTETEH-RKY--KTL-----  
--YSVLSHGTLISISN-NTPFGQLLGASANGRRAMPLSD-GISPTQGADYKGPATAIKS-  
-VSKMAN-DNMNI-----GMVHNFKLMSGLLDTPEG--ENGLITLIRTACM-  
----LNGGEMQFNLYLDNELLLDAQKHPEKYRDLVVRVAGYSAFFVELCKDVQDEIISRTM  
LHGF-----

>gi++|219666434|ref|YP\_002456869.1| Formate C-acetyltransferase [Desulfitobacterium  
hafniense DCB-2]

-----MSACCLSPHEERIIDPQKG  
KVNYEGRERVF-----

-----KIL-----ESF--QDLRPK-IDVERAKYF  
TESFKAT-EGQ-PLQ-----LR---WAKALMHIAQNITVYIDDQ-QLIVGRAGAQ-GR  
YGIIFPELD--GDFLGLAIEQ--LPQRVES--P-----  
---FNIDPDDAQIII-NDVAPYW---KGKTFHEELAKA---LPE-----  
-DTLKVT-----YDPADPLASRFIVNET--ASFRSS-----  
---IQVVDYKVL--KRGFKGIKEEAQAKLDQLDPL-----SPADNM---EKRPF  
LEAVIITCDIVVWANRHADLAAQMAKLE-KDPQRKQELSDIAERCAWVPAHPARNFREA  
VQSQWVQMFSTRIEQKTGTI-ISNGRMDQYFYPPYQKDA-E--GILNTQQ-----AIEL  
LECMWVGMAQ-FIDLKYLSPGGAFNEGAYHWEAVT---VGGQ-TP-DGV--DATNELTYL  
FLESKQKF-PLNYPDLAARIH-SRSPERYLYEVAETVK-EGTGFPKLIN-DEEVVPLLS  
-----K-----G---AKFAEALDYAVS-GCAE-----CRMPNR  
DTYT-----SGNPYINF--AAAIEMTLYNGR---MLKYGDEQL-----GL-ETG  
DPT--QFETWDEFWKAYLAQQTNFLKHAFIQHHIIRLRAQHFAS--PLGSLMHDLCMEN  
YTDLHQPVIKGGI-----DLGYFE-LIGYGTVDLSLAAIKLVYEEKKL-TMAELL--  
-----EAVRNNFE-----G-H-----

-----EVIRE-----

-----MVMH--TPKYGNNDPYSDVIAKEVDRTAVEFT-KKYS-REL-----  
--GVHLDLRLVPFTS-HVPFGKVVSATPNGRKAWMPLAD-GSSASHGADVNGPTAVLLSN  
FFSKNYG-YRNRA-----ARLLNIKLSPSCVAGEEG--SEKLVSFIRTWCD-  
----LKLWHIQFNIVNRETLAQAQDPDKYRGLIVRVAGYSAYFVDLSSDLQDDIIARTE  
HEMI-----

>gi++|117621288|ref|YP\_855870.1| pyruvate formate-lyase [Aeromonas hydrophila subsp.  
hydrophila ATCC 7966]

SupplementalMultipleSequenceAlign.txt

```
-MMEGLTPRLQ-----  
-----  
-----RLR-----NHY-LT-VRPS-VSIYRAQAF  
TEVVKAN-PGM-PTI-----LL-----RAKAFRHACETAPILIQDD-ELIVGHPCGK-PR  
AGAFSPDIA--WRWVRELDLT--MSTRPQD--P-----  
---FEISEADKKTIR-EEIVPFW-----EGRSLDEICEAQ---YRE-----  
-AGVWAF-----SGETFVSDLSY--HQINGG-----  
-----GDTCPGYDVLLF-TKGMNGIKADAQAHL DQLSM-----ENPDDI---DRIYY  
YKAAIETCEGVVNYARRIAAHARELAAKE-QDAQRRRAELLTIAEVNENVPANPPKTLQEA  
LQSIWTVESLFEIEENQTG--LSLGRVDQYCYPMFEADIR-E--GRLTHES-----ALEL  
MQAFIIKCAE-LMWM-SSELGAKYFAGYQPFINLT---VGGQ-KR-SGG--DACNDLTYL  
IMDAVRFV-KVYQPSLACRIH-NQSPQKYM EKIVDVVK-AGMGFPACHF-DDSHIKMMLR  
-----K-----G---FDFEDARDYCLM-GCVE-----PQKSGR  
-IYQ-W---TSTGYTQW--PIAIEFVLNRGR---MVLFDS-HQ-----GL-DTG  
DLR--ELRTFEQFDAAVKQIAHIVRMSAVGTVISQRVHRDVAPK--PLMSLMVEGCMES  
GKDVSA----GGAMI-----NYGPGLIFSGLATYVDSMAAIRKLVFEEQRY-TLEQIR--  
-----DALLANFE-----G-F-----  
-----EALRR-----  
-----DCLN--APKYGNDDNYVDQYALDITEWTEKEC-RKY--KML--Y-----  
---SRM SHGTL S ISN-NTPIGELTNATPNGRLAWMPLSD-GISPTQGADKQGPTAIKS-  
-VSKMNV-ETMNI-----GMVHNFKFLKGLLD TQEG--RHGLITLLRTASI-  
----LGNGQM QFSYVDNEVLKKAQEQEPEKYRDLIVRVAGYSAYFVELCKEVQDEIISRTV  
IEKF-----
```

>gi++|206580147|ref|YP\_002240668.1| putative formate C-acetyltransferase [Klebsiella pneumoniae 342]

```
-----MAHYNLTPRVKVLADRLLAQKSTLCTEHATTLNALDGDIAGVPAAVKP  
ARRFYELMRQLPTISADELIVGNQTRKPHGAI FHDENATRRPSVFQFLNLNSELDSPDY  
KLVVEKGVLAIKHQLEEKTRALGSAVSRSGMDEVNGCRAAIYACDALLALAQNLANSAEQ  
LAAAETNAYRKAEL LDSAAILHHVPAHPARNFKEACQAFYLQ LALQLDNGSYAVNPQGA  
DIALLPYFQRNINS GALNTQQAYEIVECLWFKLAEL SEVRAACAIDGYPMLDAML RGA AF  
DH--AEVNELSAMFISAQRNLSAL--NLPVRLFSGVQPV-----SHAPFAACADT  
PVMEGLTPRMQ-----
```

```
-----RLR-----NHY-LT-VRPS-VSIYRALAF  
TEVVKAN-PGM-PTI-----LL-----RAKAFRHACETAPILIQDD-ELIVGHPCGK-PR  
AGAFSPDIA--WRWVRELDLT--MSTRPQD--P-----  
---FEISEADKKTIR-EEIVPFW-----EGRSLDEICEAQ---YRE-----  
-AGVWAF-----SGETFVSDLSY--HQINGG-----  
-----GDTCPGYDVLLF-TKGMNGIKADAEHLASLSM-----ENPEDI---DRIYY  
YKAAIETCEGVVNYARRIAAHARELAAKE-QNAQRRRAELLTIADVNENVPANPPKTLQEA  
LQSIWTVESLFEIEENQTG--LSLGRVDQYCYPMFEADIR-E--GRLTHDS-----ALEL  
LQAFIIKCAE-LMWM-SSELGAKYFAGYQPFINLT---VGGQ-KR-SGG--DACNDLTYL  
IMDAVRFV-KVYQPSLACRIH-NQSPQKYM EKIVDVVK-AGMGFPACHF-DDSHIKMMLR  
-----K-----G---FDFEDARDYCLM-GCVE-----PQKSGR  
-IYQ-W---TSTGYTQW--PIAIEFVLNRGR---MVLFDS-YQ-----GL-DTG  
DLR--DLRTFDEFDAAVKQIAHIVRLSAIGTVISQRVHRDVAPK--PLMSLLVEGCMES  
GKDVA A----GGAMV-----NHGPGLIFSGLATYVDSMAAIRKLVFEEKKY-TLEQIR--  
-----DALLANFE-----G-Y-----  
-----EALRR-----
```

```
-----DCLN--APKYGNDDNYVDQYALDITEWTEKEC-RKY--KML--Y-----  
---STLSHGTL S ISN-NTPIGELTNATPNGRLAWMPLSD-GISPTQGADKQGPTAIKS-  
-VSKMNV-ETMNI-----GMVHNFKFLKGLLD TPEG--RHGLITLLRTASI-  
----LGNGQM QFSYVDNEVLKKAQEQEPEKYRDLIVRVAGYSAYFVELCKEVQDEIISRTV  
IEKF-----
```

>gi++|89897752|ref|YP\_521239.1| pyruvate-formate lyase [Desulfitobacterium hafniense Y51]

```
-----  
-----  
-----  
-----  
-----  
-----  
-----  
-----MKLFQEISKELAANSPSPAYQERKSPVYE  
GEITGLTPRLN-----
```

SupplementalMultipleSequenceAlign.txt

-----NLR-----TVY-LQ-AKPS-VSIDRARAF  
TEVTREN-PGL-PKI-----LL-----RAKCFRRACETAPLLIQKD-ELIVGHPCGK-PR  
AGAFSPDIA--WRWVRDELDT--MATRPQD--P-----  
---FQISEEDKRILR-EEIFPFW-----EGKSVDEICQKQ---YED-----  
-AGIWSF-----SGESFVSDLSY--HQINGG-----  
-----GDTAPGYDVILI-KKGIKQVQEAEDRLSRLSM-----ENPEDI---DKIYF  
YKAEIETCDGILAYARRLSDYARESADRE-VDSVRKQELHKKIADVLTWVPANPPRTFHEA  
LQSIWTLESFLVVEENQTG--ISLGRLDQYIYPMFKADMD-A--GRLNKLE-----AFEL  
MSCFLIKCSE-VMWL-SSEQGAKYFAGYQPFINCT---VGGQ-KR-TGG--DATNELTYL  
IMDAVRFT-KMYQPSLACRIH-NQSPQRYLKKIVEVVK-AGLGFPACHF-DDSHIKMMLA  
-----K-----G---FSIEDSRDYCLM-GCVE-----PQKSGG  
-IYQ-W---TSTGYTQW--PIAIEFVLNRGV---MKWRGTME-----GL-DTG  
DLD--NFKTYEEFDAACKQIENIIRLSAIGTIISQRVHKELVPK--PLMSLLVEGCMEK  
GTDVTS---GGARI-----NFGPGLIFSGLGTYADSMAAIKKLVFEEKKY-TLKQIR--  
-----DALNANFE-----G-Y-----

-----EALRT-----  
-----DCLN--APKYGNDDDYADLIASDLIVWTERVH-NSF--KML-----  
--FSHFTHTLSISN-NTPIGEITGATPNGRLAWTPLSD-GISPTQGADKFGPTAIKS-  
-VSKLSV-ESMNI-----GMVHNFKLLRGILETPEG--ENGLITLLRTASI-  
----LGNGQMQFSYVDNEVLKRAQIEPDKYRDLIIRVAGYSAYFVELCKEVQDEIISRTV  
LEHF-----

>gi++|219670900|ref|YP\_002461335.1| Formate C-acetyltransferase [Desulfitobacterium hafniense DCB-2]

-----MDSKEFSAKFADVTKNLSPEETAIVMKL FQEISKELAANSP  
SPAYQ-----  
-----  
-----ERKSPVYEGEI  
T---GLTPRLN-----

-----NLR-----TVY-LQ-AKPS-VSIDRARAF  
TEVTREN-PGL-PKI-----LL-----RAKCFRRACETAPLLIQKD-ELIVGHPCGK-PR  
AGAFSPDIA--WRWVRDELDT--MATRPQD--P-----  
---FQISEEDKRILR-EEIFPFW-----EGKSVDEICQKQ---YED-----  
-AGIWSF-----SGESFVSDLSY--HQINGG-----  
-----GDTAPGYDVILI-KKGIKQVQEAEDRLSRLSM-----ENPEDI---DKIYF  
YKAEIEACDGILAYARRLSDYARESADRE-VDSVRKQELHKKIADVLTWVPANPPRTFHEA  
LQSIWTLESFLVVEENQTG--ISLGRLDQYIYPMFKADMD-A--GRLNKLE-----AFEL  
MSCFLIKCSE-VMWL-SSEQGAKYFAGYQPFINCT---VGGQ-KR-TGG--DATNELTYL  
IMDAVRFT-KMYQPSLACRIH-NQSPQRYLKKIVEVVK-AGLGFPACHF-DDSHIKMMLA  
-----K-----G---FSIEDSRDYCLM-GCVE-----PQKSGG  
-IYQ-W---TSTGYTQW--PIAIEFVLNRGV---MKWRGT-ME-----GL-DTG  
DLD--NFKTYEEFDAACKQIENIIRLSAIGTIISQRVHKELVPK--PLMSLLVEGCMEK  
GTDVTS---GGARI-----NFGPGLIFSGLGTYADSMAAIKKLVFEEKKY-TLKQIR--  
-----DALNANFE-----G-Y-----

-----EALRT-----  
-----DCLN--APKYGNDDDYADLIASDLIIWTERVH-NSF--KML--F----  
---SHFTHGTLSISN-NTPIGEITGATPNGRLAWTPLSD-GISPTQGADKFGPTAIKS-  
-VSKLSV-ESMNI-----GMVHNFKLLRGILETPEG--ENGLITLLRTASI-  
----LGNGQMQFSYVDNEVLKRAQIEPDKYRDLIIRVAGYSAYFVELCKEVQDEIISRTV  
LEHF-----

>gi++|218549330|ref|YP\_002383121.1| putative Formate C-acetyltransferase (Pyruvate formate-lyase) [Escherichia fergusonii ATCC 35469]

MPLITRTGDPYLMANYNLTPRVKLAERLLAHPSTLCVEHAGILSGLDGIAGIPAAVKP  
ARRFYELMRQLPLAVSPDELIVGNQTHRPHGAI FHDESTAHRPSVFQFLNLSDDLAPDY  
KLVIIEKGVLAIKQQL EEKTRSLGSAVSRSGMDEVNACRAAIYACDALMQLAQNLA TSAEK  
LAATETNAYRKAELSESAAI LHHIPAHPARSFKEACQAFYL FQLALQLDNGSYAVNPEGA  
DKALLAYYQHDIANGLL TEAQAYEIVECLWFKLAEL SEVRAACAIDGYPMFDALLHGASL  
EN--AVINPLSEMFLNAQRNLSAL--NL PVRLFHGAHKT-----VTT PFAACSET  
PVLEGLTPRIQ-----

SupplementalMultipleSequenceAlign.txt

```
-----RLR-----NHY-LT-VRPS-VSIYRALAF
TEVVKAN-PGM-PAI-----LL-----RAKAFRHACETAPILIQND-ELIVGHPCGK-PR
AGAFSPDIA--WRWVRDELDT---MSTRPQD--P-----
---FEISEEDKKTIR-EEIVPFW-----EGRSLDEICEAQ---YRE-----
-AGVWSF-----SGETFVSDLSY--HQVNGG-----
-----GDTCPGYDVLLF-TKGMNGIKADAEHLAELSM-----ENPEDI---DRIYY
YKAAIETCEGVINYAHRIAARARELAAVE-QNAQRRRAELLTIAEVNQNPANPPKTLQEA
LQSIWTVESLFEIEENQTG--LSLGRVDQYCYPMFEADIR-E--GRLTHEG-----ALEL
MQAFIIKCAE-LMWM-SSELGAKYFAGYQPFINLT---VGGQ-KR-SGG--DACNDLTYL
IMDAVRFV-KVYQPSLACRIH-NQSPQKMEKIVDVVK-AGMGFPACHF-DDSHIKMMLR
-----K-----G---FDFEDARDYCLM-GCVE-----PQKSGR
-IYQ-W----TSTGYTQW--PIAIEFVLRGR---MVLFDY-YQ-----GL-DTG
DLK--DLRTFEDFDAVKKQVAHIIRLSAIGTVISQRVHRDVAPK--PLMSLLVEGCMEK
GKDVSA---GGAMV-----NHGPGLIFSGLATYVDSMAAIRKLVYEDKKY-TLEQIR--
-----DALLANFE-----G-Y-----
-----EGLRR-----
-----DCLN--APKYGNDNYVDQYALDITETEREC-RKY--KML--Y----
---STLSHGTLISISN-NTPIGELTNATPNGRLAWMPLSD-GISPTQGADKHGPTAIKS-
-VSKMNV-ETMNI-----GMVHNFKFLKGLLDTPPEG--RNLITLLRTASI-
----LGNGQMFSYVDNEVLKKAQPEPEKYRDLIVRVAGYSAYFVELCKEVQDEIISRTV
IEKF-----
```

>gi++|218702456|ref|YP\_002410085.1| putative Formate C-acetyltransferase (Pyruvate formate-lyase) [Escherichia coli IAI39]

```
MPLITRTGDPYLMANYNLTPRVKVLAERLLAHPSTLCVEHAGILSGLDGDIAIGIPAAVKP
ARRFYELMRQLPLAVSPDELIVGNQTHRPHGAI FHDESTAHRPSVFQFLNLSLDLAPDY
KLVIEKGVLAIKQQL EEKTRSLGSAVSRSGMDEVNACRAAIYACDALMQLAQNLATSAEK
LAATETNAYRKAELSESAAILHHIPARPARSFKEACQAFYLFQLALQLDNGSYAVNPEGA
DKALLAYYQHDIANGLL TEAQAYEIVECLWFKLAELSEVRAACTIDGYPMFDALLHGASL
EN--AVINPLSEMFLNAQRNLSAL--NLPIRLFHGAHKT-----VTTLCAACNET
PVLEGLTPRIQ-----
```

```
-----RLR-----NHY-LT-VRPS-VSIYRALAF
TEVVKAN-PGM-PTI-----LL-----RAKAFRHACETAPILIQDD-ELIVGHPCGK-PR
AGAFSPDIA--WRWVRDELDT---MSTRPQD--P-----
---FEISEEDKKTIR-EEIVPFW-----EGRSLDEICEAQ---YRE-----
-AGVWSF-----SGETFVSDLSY--HQVNGG-----
-----GDTCPGYDVLLF-TKGMNGIKADAEHLAELSM-----ENPEDI---DRIYY
YKAAIDTCEGVINYAHRIAARARELAAVE-QNAQRRRAELLTIAEVNQNPANPPKTLQEA
LQSIWTVESLFEIEENQTG--LSLGRVDQYCYPMFEADIR-E--GRLTHEG-----ALEL
MQAFIIKCAE-LMWM-SSELGAKYFAGYQPFINLT---VGGQ-KR-SGG--DACNDLTYL
IMDAVRFV-KVYQPSLACRIH-NQSPQKMEKIVDVVK-AGMGFPACHF-DDSHIKMMLR
-----K-----G---FDFEDARDYCLM-GCVE-----PQKSGR
-IYQ-W----TSTGYTQW--PIAIEFVLRGR---MVLFDY-YQ-----GL-DTG
DLK--DLRTFEDFDAVKKQVAHIIRLSAIGTVISQRVHRDVAPK--PLMSLLVEGCMEK
GKDVSA---GGAMV-----NHGPGLIFSGLATYVDSMAAIRKLVYEDKKY-TLEQIR--
-----DALLANFE-----G-Y-----
-----EGLRR-----
-----DCLN--APKYGNDNYVDQYALDITETEREC-RKY--KML--Y----
---STLSHGTLISISN-NTPIGELTNATPNGRLAWMPLSD-GISPTQGADKHGPTAIKS-
-VSKMNV-ETMNI-----GMVHNFKFLKGLLDTPPEG--RHGLITLLRTASI-
----LGNGQMFSYVDNEVLKKAQPEPEKYRDLIVRVAGYSAYFVELCKEVQDEIISRTV
IEKF-----
```

>gi++|91213912|ref|YP\_543898.1| hypothetical protein UTI89\_C4964 [Escherichia coli UTI89]

```
MPLITRTGDPYLMANYNLTPRVKVLAERLLAHPSTLCVEHAGILSGLDGDIAIGIPAAVKP
ARRFYELMRQLPLAVSPDELIVGNQTHRPHGAI FHDESTAHRPSVFQFLNLSLDLAPDY
KLVIEKGVLAIKQQL EEKTRSLGSAVSRSGMDEVNACRAAIYACDALMQLAQNLATSAEK
LAATETNAYRKAELSESAAILHHIPARPARSFKEACQAFYLFQLALQLDNGSYAVNPEGA
DKALLAYYQHDIANGLL TEAQAYEIVECLWFKLAELSEVRAACAIDGYPMFDALLHGASL
EN--AVINPLSEMFLNAQRNLSAL--NLPIRLFHGAHKT-----VTTLCAACNET
PVLEGLTPRIQ-----
```

```
-----RLR-----NHY-LT-VRPS-VSIYRALAF
```



SupplementalMultipleSequenceAlign.txt

```

TEVVKAN-PGM-PTI-----LL-----RAKAFRHACETAPILIQDD-ELIVGHPCGK-PR
AGAFSPDIA--WRWVRDELDT---MSTRPQD--P-----
---FEISEEDKKTIR-EEIVPFW-----EGRSLDEICEAQ---YRE-----
-AGVWSF-----SGETFVSDLSY--HQVNGG-----
-----GDTCPGYDVLLF-TKGMNGIKADAEAHLAELSM-----ENPEDI---DRIYY
YKAAIDTCEGVINYAHRIAARARELAAVE-QNAQRRAE LLTIAEVNQNPANPPKTLQEA
LQSIWTVESLFEIEENQTG--LSLGRVDQYCYPMFEADIR-E--GRLTHEG-----ALEL
MQAFIIKCAE-LMWM-SSELGAKYFAGYQPFINLT---VGGQ-KR-SGG--DACNDLTYL
IMDAVRFV-KVYQPSLACRIH-NQSPQKMEKIVDVVK-AGMGFPACHF-DDSHIKMMLR
-----K-----G---FDFEDARDYCLM-GCVE-----PQKSGR
-IYQ-W----TSTGYTQW--PIAIEFVLNRGR---MVLFDS-YQ-----GL-DTG
DLK--DLRTFEDFDAVKKQVAHIIRLSAIGTVISQRVHRDVAPK--PLMSLLVEGCMEK
GKDVSA----GGAMV-----NHGPGLIFSGLATYVDSMAAIRKLVYEDKKY-TLEQIR--
-----DALLANFE-----G-Y-----
-----EGLRR-----
-----DCLN--APKYGNDDNYVDQYALDITETEREC-RKY--KML--Y----
---STLSHGTLISIN-NTPIGELTNATPNGRLAWMPLSD-GISPTQGADKHGPTAIKS-
-VSKMNV-ETMNI-----GMVHNFKFLKGLLDTPEG--RHGLITLLRTASI-
----LGNGQMQFSYVDNEVLKKAQEQPEKYRDLIVRVAGYSAYFVELCKEVQDEIISRTV
IEKF-----

```

>gi++|197286545|ref|YP\_002152417.1| propanediol utilization protein (dehydratase) [Proteus mirabilis HI4320]

```

-----MAKYSLTPRVKMLAERLVSRRSSISTERATIFDSLNNIAGVPQAIKP
AQRFYQFIRHFPYSYIAQDELIIGSQSSTPRGAIHFSEEEVRSDSIYRFLSINNSVTSPDY
MLVVNQGF LAIKAQLED RMRSIGSAVNRSSMDEANFCKSAIYACDAALYFAQLLSAKAEN
LAAMEGNPYRKAELLESAAILRKVPAPKPAETFKAVQVFYLLQLLHLLENGSYAINPMGF
DKALYPFYQRDIDQGR LTPAQAYEIVESLWLKLAELSEVRATKEVDGYPMFDAMTQGIDI
NDPRVSINELSEM LLSARANLSALHSSLQVRLYNGRMNTPPQYASPSANVVTPATANGEL
TVMEGLTPRLQ-----

```

```

-----RLR-----NRY-LE-ARPS-VSIYRALAF
TEIARNN-PGL-PPI-----LL-----RAKAFRRACETAPILIQDE-ELIVGHPCGK-PR
AGAFSPDIA--WRWVRDELDT---MSTRPQD--P-----
---FQISEEDKKVIR-EEIVPFW-----EGRSLDEICEAQ---YRE-----
-AGVWEF-----SGETFVSDLSY--HQINGG-----
-----GDTCPGYDVLLF-TKGMNGIKADAQAKLAELSM-----ENPADI---DRIYF
YKASIESCEGVIAAHRIAHAHARELASKE-SDPQRREELLTIAQVNVNVPANPPKTLQEA
LQSIWTVESLFEVEENQTG--LSLGRLDQYCFPMYENDIK-T--GRLTREQ-----ALEM
MQAFIIKCAE-LMWM-SSELGAKYFAGYQPFINLT---VGGQ-KR-SGG--DACNDLTYL
IMDAVRFV-KVYQPSLACRIH-NQSPQQYMEKIVDVVK-AGMGFPACHF-DDSHIKMMLR
-----K-----G---FDFEDARDYCLM-GCVE-----PQKSGR
-IYQ-W----TSTGYTQW--PIAIEFVLNRGR---MVLFDS-YQ-----GL-DTG
DLR--DLRTYEDFDRVKEQVAHIIRLSAIGTVISQRVHRDIAPK--PLMSLLVEGCMEQ
GKDVRTA----GGAMV-----NHGPGLIFSGLATYVDSMAAIRKLVYEDKKY-TLEQIR--
-----DGLLANFE-----G-H-----
-----EELLR-----
-----DCLN--APKFGNDDVVDQYALDITETEREC-RKY--KML--Y----
---STFSHGTLISIN-NTPIGELTAATPNGRLAWKPLSD-GISPTQGADKHGPTAIKS-
-ISKMNV-ETMNI-----GMVHNFKFLKGLLDTNEG--RQGLITLLRTASI-
----LGNGQMQFSYVDNEVLKKAQLEPEKYRDLIVRVAGYSAYFVELCKEVQDEIISRTV
IEKF-----

```

>gi++|51246879|ref|YP\_066763.1| formate acetyltransferase [Desulfotalea psychrophila LSV54]

```

-----
-----
-----
-----
-----MSVECC---RSPHEQMIMDKAAGKV
NKFRATHERVF-----
-----
-----KIL-----DKI-ET-AKPQ-IDIERALYF
TQGMQET-EGQ-HLN-----LR-----WAKSLMKCAENMTVYIDDD-QLLAGRIGYQ-GR

```

SupplementalMultipleSequenceAlign.txt

```

YGVLYPELD--GDFLDTAVVD---LPTRDNS--P-----
---FSISQADADIVV-KEIAPYW-----KGKTYHETLAKT---LPA-----
-DVHALT-----YDDPDGMVSRFIVNET--ASFRSS-----
-----NQWVHDFDKVL--KRGFGGLRDEFTVQLEALDPL-----SPGDNV---DKKPF
LQAAILVCEAVIVWAKRHAALAMELAEK-ADPVRKAELLKMAEVCNHVPEHPARTFYEA
CQSQWFTQMFSRLEQKTGTI-ISNGRMDQYLYPFYKQDIE-A--GILTDDQ-----AIEY
VELMYVGMAQ-YIDLISPTGGAFNEGYAHWEAVT---IGGQ-TP-DGL--DATNELTYL
FLRSKREF-PHHYPDLAARIH-ARAPERFLAEVAETIK-EGSGFPKLIN-DEEVIPLHLA
-----K-----G---AKFEEIYDYSVS-GCAE-----IRMPNR
-DTY-T---AGGCYINF--VAALESVFFNGK---MLKFGDAQL-----SI-ETG
DVT--KMETWEEFVNAYKAQHINFLKIAFEQQYYVIKTRARHFAA--PMGSALHDLAMKH
CIDIHQPIPEGI-----DLGYFE-FMGVGTLVDSMSAIKKFVFEKKV-TMTEVL--
-----EAMKNNFE-----G-Q-----
-----EDLRA-----
-----LMMT--APCFGNNDPYADSIARDLDQLCVGYA-EKYQ-REL-----
--GVFLDLRYVPFTS-HVPFGKVVCATPNGRYAGTSLSD-GSSASHGADKNGPTAVLLSN
YTSKNFN-HRERA-----ARLVNIKFTPKCVQGEEG--TQKLVHFIRTFCD-
----LRLWHIQFNVVNAETLRLAQENPEAYRTLIVRIAGYSAYFCDLSKDLQNDLIRRTA
HENM-----
>gi++|160879323|ref|YP_001558291.1| pyruvate formate-lyase [Clostridium
phytofermentans ISDg]

```

```

-----MMAEP
KKGYEKSPRIQ-----
-----KLM-----DAL-YE-KMPE-IESKRAVLI
TESYQQT-EGE-PII-----SR---RSKAFEHIVKNLVVIREN-ELIVGSATVA-ER
GCQTFPEFS--FDWLIAELDT---VATRTAD--P-----
---FYISEEAKKELR--KVHSYW-----KGKTTSELADYY---MAP-----
-ETKLAM-----EHNVFTPGN--YFYNGV-----
-----GHITVQYDKVI--AIGYEGIKDEVLSRKKELHL-----GDADYA---SRLTF
YDAVIRSCDSAILYAKRYAAEAKRLALSC-QDEKRRQELLMISSNCERVPAKGANTFYEA
CQAFWFVQLLLQIEASGHS--ISPGRFDQYLYSYYKADRE-A--GRITGEQ-----AQEI
IDCIFVKLND-INKC-RDAASAEGFAGYGMFQNMI---VGGQ-DS-NGR--DATNELSFM
ILEASIHT-MLPQPSLSIRVW-NGSPHLLIKAAEVTR-TGIGLPAYYN-DEVII PAMMN
-----K-----G---ATLEEARNYNII-GCVE-----PQVPGK
TDGW-----HDAAFFNM--CRPLEMVFSSGY-----ENGK-LV-----GA-PTG
SVE--NFTTFAFYDAYKTQMEYFISLLVNADNSIDIAHAKLCPL--PFESSMVEDCIGR
GLCVQE---GGAKY-----NFTGPQ-GFGIANMTDSLYAIKKLVYEEGKV-SITELK--
-----EALLHNFG-----MTTKNAGLKESHLSDIILAQQITVQ
IVKELKERGKEPEKEIEQILKTVLEAKKENTESPISTRVSENSTNHSRYQEILQ-----
-----MIEV--LPKYGNDILEIDEFAREIAYTYTKPL-QKY--KNP--R----
--GGVFQAGLYPVSA-NVPLGEQTGATPDGRLANTPIAD-GVGPAPGRDTKGPTAAANS-
-VARLDH-MDATN-----GTLYNQKFHPSALQGRGG--LEKFVALIRAFFD-
---QKGMHVQFNVSRETL LDAQKHPENYKHLVVRVAGYSALFTTSLRSLQDDIINRTT
QGF-----
>gi|28901422|ref|NP_801077.1| putative pyruvate formate lyase [Vibrio
parahaemolyticus RIMD 2210633]

```

```

MDLHTLPERIK-----
-----AHK-----SAL-VNIVTPP-ICTERAEAY
TRAYQAN-EDK-PVI-----VQ---RALALQEHLRTRTIWIKHD-ELIVGNQASK-VR
AAPIFPEYT--VRWIEAEIDE---LADRPGA--G-----

```

SupplementalMultipleSequenceAlign.txt

```
---FSVSEEDKQSIH--AITPYW-----RGKTVQDRCYGL---FTD-----
-EQQEIL-----ASTIIKAEG--NMTSGD-----
-----AHLAVDNEKIL--KIGMNGLLNEVRQHRANNDV-----STYEGEGL---KKEQF
YKAVEIVLLAIQEHMVSYADLALEMAQNE-TRPERKAELETIAENCRHVAFHAPTDFWQA
LQLSYFVQLMLQIESNGHS--VSFGRMDQFLNDYYVRGLE-S--GAMNKAF-----ALEL
LQSCWLKLLLE-VNKI-RSGAHSKASAGSPLYQNVV---IGGQKLNENGEPEDAVNPLSWA
ILESCGQL-RSTQPNLSVRYH-EGLNQEFMGCIEVIK-CGFGMPAFNN-DEIVIPEFIK
-----L-----G---VEKADAYNYASI-GCIE-----TAVPGK
-----WGYRCTGMSFINF--ARILLAALNEGVE---DATTGK-AF-----LS-HDK
SLAKGNFESFEQVTASWAEQIRYYTRKSIEIDTVVDSVLEQQAQD--IFCSSLVDDCLAR
GKTVKE---GGAKY-----DWVSGL-QVGIANLGNLSLAATIKHLVFEEAQI-SQTELA--
-----KALEEDFD-----GIE-----
-----NEQLRQR-----
-----LINF--APKYGNDDDYVDQLLADAYQVYIDEL-AQF--VNT--RHGRG
PIGGGYAGTSSISA-NVPFGASTMATPDGRKAKTPLAE-GASPASGSDRLGPTAVYNS-
-VGKIQA-NKILG-----GVLLNQKLSPAAVASEGD--KLKLSMLIRTFFNH
----HKGWHVQYNIVSRETLLAAKKNPEQYRDLVVRVAGYSAFFTALSPDAQDDIIARTE
HEL-----
```

>gi|206576877|ref|YP\_002239528.1| formate C-acetyltransferase 3 [Klebsiella pneumoniae 342]

```
-----MTT
LKLNTLSARIQ-----
-----AHK-----MAL-VHIVKPP-VCTERARHY
TEMYQQH-LDK-PIP-----VR---RALALAHHLAERTIWIKHD-ELIVGNQASE-VR
AAPIFPEYT--VSWIEKEIDD--LADRPGA--G-----
---FSVSEENKRVLH--EVCPPW-----RGQTVQDRCYGM---FTD-----
-EQKALL-----ATGIIKAEG--NMTSGD-----
-----AHLAVNYPLLL--EKGLDGMRAKVAERRSRINL-----TVLEDL---HGEQF
LKAIDIVLEAVSDHSKRFAALAREMATAE-SRESRRHELLTIAENCDIIAHEPPKTFWQA
LQLCYFIQLILQIESNGHS--VSFGRMDQYLYPYRRDVELQ--QSLDREQ-----AIEL
LHSCWLKLLLE-VNKI-RSGSHSKASAGSPLYQNVV---IGGQ-NLVDGQPQDAVNPLSYA
ILESCGRL-RSTQPNLSVRYH-AGMSNDFLDACVQVIR-CGFGMPAFNN-DEIVIPEFIK
-----L-----G---IEPQDAYDYAAI-GCIE-----TAVGGK
-----WGYRCTGMSFINF--ARVMLATLEGGR---DATSGQ-VF-----LP-QEH
ALSKGNFANFDQVLADWDNQIRYYTRKSIEIEYVVDTMLEENVHD--ILCSALVDDCIER
AKSIKQ---GGAKY-----DWVSGL-QVGIANLGNLSAAVKKLVFDQGAII-GQQELA--
-----KALAEDFD-----GLT-----
-----HEQLRQR-----
-----LING--APKYGNDDDSVDELLARAYQTYIDEL-KQY--HNP--RYGRG
PIGGNYAGTSSISA-NVPFGAQTMATPDGRKAHTPLAE-GASPASGTDHLGPTAVISS-
-VGKLP-T-GAILG-----GVLLNQKLNPNSTLENESD--KQKLMVLLRTFFEV
----HKGWHIQYNIVSRDTLLEAKKHPDQYRDLVVRVAGYSAFFTALSPDTQDDIIARTE
HTL-----
```

>gi|215485909|ref|YP\_002328340.1| predicted pyruvate formate lyase [Escherichia coli O127:H6 str. E2348/69]

```
-----MTT
LKLDTLSDRIK-----
-----AHK-----NAL-VNIVKPP-VCTERAQHY
TEMYQQH-LDK-PIP-----VR---RALALAHHLANRTIWIKHD-ELIIGNQASE-VR
AAPIFPEYT--VSWIEKEIDD--LADRPGA--G-----
---FAVSEENKRVLH--EVCPPW-----RGQTVQDRCYGM---FTD-----
```

SupplementalMultipleSequenceAlign.txt

-EQKGLL-----ATGIIKAEG--NMTSGD-----  
-----AHLAVNFPLLL--EKGLDGLREKVAERRSRINL-----TVLEDL---HGEQF  
LKAIDIVLVAVSEHIERFAALAREMAATE-TRESRRDELRAIAENCGLIAHQPPQTFWQA  
LQLCYFIQLILQIESNGHS--VSFGRMDQYLYPYRRDVELN--QTLDREH-----AIEM  
LHSCWLKLLLE-VNKI-RSGSHSKASAGSPLYQNVV---IGGQ-NLVDGQPMDAVNPLSYA  
ILESCGRL-RSTQPNLSVRYH-AGLSNDFLDACVQVIR-CGFGMPAFNN-DEIVIPEFIK  
-----L-----G---IEPQDAYDYAAI-GCIE-----TAVGGK  
-----WG YRCTGMSFINF--ARVMLAALEGGR---DATSGK-VF-----LP-QEK  
ALSAGNFNNFDEVMDAWDTQIRYYTRKSIEIEYVVDTMLEENVHD--ILCSALVDDCIER  
AKSIKQ----GGAKY-----DWVSGL-QVGIANLGNSLA AVK KLVFEQGAI-GQQQLA--  
-----AALADDFD-----GLT-----  
-----HEQLRQR-----  
-----LING--APKYGNDDDDTVDTLLARAYQTYIDEL-KQY--HNP--RYGRG  
PVGNNYYAGTSSISA-NVPFQAQTMATPDGRKAHTPLAE-GASPASGTDHLGPTAVIGS-  
-VGKLP T-AAILG-----GVLLNQKLN PATLE NESD--KQKLMILLRTFFEV  
----HKGWHIQYNIVSRETLL EAKKHPNQYRDLVVRVAGYSAFFTALSPDAQDDIIARTE  
HML-----

>gi|161614901|ref|YP\_001588866.1| hypothetical protein SPAB\_02655 [Salmonella enterica subsp. enterica serovar Paratyphi B str. SPB7]

-----MTQ  
LKLDTLSDRIK-----

-----AHK-----TAL-VHIVKPP-VCTERAQHY  
TEMYQQH-LDK-PIP-----VR---RALALAHHLAERTIWIKHD-ELIVGNQASE-VR  
AAPIFPEYT--VSWIEKEIDD--LADRPGA--G-----  
---FVS EENKRILH--DVCPWW-----RGQTVQDRCYGM---FTD-----  
-EQKGLL-----ATGIIKAEG--NMTSGD-----  
-----AHLAVNFPLLL--EKGLDGLRDKVAERRSRINL-----TVLEDL---HGEQF  
LKAIDIVLDAVSQHITRFAALARQMAGEE-SRESRRKELLTIAENCEVIAHQPPQTFWQA  
LQLCYFIQLILQIESNGHS--VSFGRMDQYLYPYRRDVELN--QTLDREH-----AIEL  
LHSCWLKLLLE-VNKI-RSGSHSKASAGSPLYQNVV---IGGQ-NLINGQPMDAVNPLSYA  
ILESCGRL-RSTQPNLSVRYH-AGMSNDFLDACVQVIR-CGFGMPAFNN-DEIVIPEFIK  
-----L-----G---IEPQDAYDYAAI-GCIE-----TAVGGK  
-----WG YRCTGMSFINF--ARVMLAALEGGR---DATSGK-VF-----LP-QEK  
ALSAGNFNNFDEVMAAWDTQIRYYTRKSIEIEYVVDTMLEENVHD--ILCSALVDDCIER  
AKSIKQ----GGAKY-----DWVSGL-QVGIANLGNSLA AVK KLVFEQGV I-GQQQLA--  
-----AALADDFD-----GLT-----  
-----HEQLRQR-----

-----LING--APKYGNDDDSVDTLLARAYQTYIDEL-KQY--HNP--RYGRG  
PVGNNYYAGTSSISA-NVPFQAATMATPDGRKAHTPLAE-GASPASGTDHLGPTAVIGS-  
-VGKLP T-GSILG-----GVLLNQKLNPTTLE NESD--KQKLMVLLRTFFEV  
----HKGWHIQYNIVSRETLL DAKKHPDQYRDLVVRVAGYSAFFTALSPDAQDDIIARTE  
HML-----

>gi|15804975|ref|NP\_286587.1| pyruvate-formate lyase [Escherichia coli 0157:H7 EDL933]

-----MTT  
LKLDTLSDRIK-----

-----AHK-----NAL-VHIVKPP-VCTERAQHY  
TEMYQQH-LDK-PIP-----VR---RALALAHHLANRTIWIKHD-ELIIGNQASE-VR  
AAPIFPEYT--VSWIEKEIDD--LADRPGA--G-----  
---FAVSEENKRVLH--EVCPWW-----RGQTVQDRCYGM---FTD-----  
-EQKGLL-----ATGIIKAEG--NMTSGD-----







SupplementalMultipleSequenceAlign.txt

```
LHSCWLKLE-VNKI-RSGSHSKASAGSPLYQNVV---IGGQ-NLVDGQPMDAVNPLSYA  
ILESCGRL-RSTQPNLSVRYH-AGMSNDFLDACVQVIR-CGFGMPAFNN-DEIVIPEFIK  
-----L-----G---IEPQDAYDYAAI-GCIE-----TAVGGK  
-----WGYRCTGMSFINF--ARVMLAALEGGR---DATSGK-VF-----LP-QEK  
ALSAGNFNNFDEVMDAWDTQIRYYTRKSIEIEYVVDTMLEENVHD--ILCSALVDDCIER  
AKSIKQ----GGAKY-----DWVSGL-QVGIANLGNSLAAVKLLVFEQGAI-GQQQLA--  
-----AALADDFD-----GLT-----  
-----HEQLRQR-----  
-----LING--APKYGNDDDTVDTLLARAYQTYIDEL-KQY--HNP--RYGRG  
PIGGNYAGTSSISA-NVPFGAQTMAPDGRKAHTPLAE-GASPASGTDHLGPTAVIGS-  
-VGKLP-AAILG-----GVLLNQKLNPTLENESD--KQKLMILLRTFFEV  
----HKGWHIQYNIVSRETLLAIAKHPDQYRDLVVRVAGYSAFFTALSPDAQDDIIARTE  
HML-----
```

>gi|62179408|ref|YP\_215825.1| putative pyruvate formate lyase [Salmonella enterica  
subsp. enterica serovar Choleraesuis str. SC-B67]

```
-----MTQ  
LKLDTLSDRIK-----
```

```
-----AHK-----TAL-VHIVKPP-VCTERAQHY  
TEMYQQH-LDK-PTP-----VR---RALALAHHLAERTIWIKHD-ELIVGNQASE-VR  
AAPIFPEYT--VSWIEKEIDD--LADRPGA--G-----  
---FSVSEENKRILH--DVCPWW----RGQTVQDRCYGM---FTD-----  
-EQKGLL-----ATGIIKAEG--NMTSGD-----  
-----AHLAVNFPLLL--EKGLDGLRDKVAERRSRINL-----TVLEDL---HGEQF  
LKAIDIVLDAVSQHITRFAALARQMAGEE-SRESRRKELLTIAENCEVIAHQPPQTFWQA  
LQLCYFIQLILQIESNGHS--VSFGRMDQYLYPYRRDVELN--QTLDREH-----AIEL  
LHSCWLKLE-VNKI-RSGSHSKASAGSPLYQNVV---IGGQ-NLINGQPMDAVNPLSYA  
ILESCGRL-RSTQPNLSVRYH-AGMSNDFLDACVQVIR-CGFGMPAFNN-DEIVIPEFIK  
-----L-----G---IEPQDAYDYAAI-GCIE-----TAVGGK  
-----WGYRCTGMSFINF--ARVMLAALEGGR---DATSGK-VF-----LP-QEK  
ALSAGNFNNFDEVMAAWDTQIRYYTRKSIEIEYVVDTMLEENVHD--ILCSALVDDCIER  
AKSIKQ----GGAKY-----DWVSGL-QVGIANLGNSLAAVKLLVFEQVI-GQQQLA--  
-----AALADDFD-----GLT-----  
-----HEQLRQR-----  
-----LING--APKYGNDDDTVDTLLARAYQTYIDEL-KQY--HNP--RYGRG  
PVGGNYAGTSSISA-NVPFGAATMAPDGRKAHTPLAE-GASPASGTDHLGPTAVIGS-  
-VGKLP-GSILG-----GVLLNQKLNPTLENESD--KQKLMVLLRTFFEV  
----HKGWHIQYNIVSRETLLDAKHPDQYRDLVVRVAGYSAFFTALSPDAQDDIIARTE  
HML-----
```

>gi|198242330|ref|YP\_002214808.1| formate C-acetyltransferase 3 [Salmonella enterica  
subsp. enterica serovar Dublin str. CT\_02021853]

```
-----MTQ  
LKLDTLSDRIK-----
```

```
-----AHK-----TAL-VHIVKPP-VCTERAQHY  
TEMYQQH-LDK-PIP-----VR---RALALAHHLAERTIWIKHD-ELIVGNQASE-VR  
AAPIFPEYT--VSWIEKEIDD--LADRPGA--G-----  
---FSVSEENKRILH--DVCPWW----RGQTVQDRCYGM---FTD-----  
-EQKGLL-----ATGIIKAEG--NMTSGD-----  
-----AHLAVNFPLLL--EKGLDGLRDKVAERRSRINL-----TVLEDL---HGEQF  
LKAIDIVLDAVSQHITRFAALARQMAGEE-SRESRRKELLTIAENCEVIAHQPPQTFWQA  
LQLCYFIQLILQIESNGHS--VSFGRMDQYLYPYRRDVELN--QTLDREH-----AIEL  
LHSCWLKLE-VNKI-RSGSHSKASAGSPLYQNVV---IGGQ-NLINGQPMDAVNPLSYA
```



SupplementalMultipleSequenceAlign.txt

ILESCGRL-RSTQPNLSVRYH-AGMSNDFLDACVQVIR-CGFGMPAFNN-DEIVIPEFIK  
-----L-----G-----IEPQDAYDYAAI-GCIE-----TAVGGK  
-----WGYRCTGMSFINF--IRVMLAALLEGGR---DATSGK-VF-----LP-QEK  
ALSAGNFNNFDEVMAAWDTQIRYYTRKSIEIEYVVDTML EENVHD--ILCSALVDDCIER  
AKSIKQ---GGAKY-----DWVSGL-QVGIANLGNSLA AVK KLVFEQGV I-GQQQLA--  
-----AALADDFD-----GLT-----

-----HEQLRQR-----  
-----LING--APKYGNDDSDVDTLLARAYQTYIDEL-KQY--HNP--RYGRG  
PVGNNYYAGTSSISA-NVPFGAATMATPDGRKAHTPLAE-GASPASGTDHLGPTAVIGS-  
-VGKLP T-GSILG-----GVLLNQKLNPTTLENESD--KQKLMVLLRTFFEV  
----HKGWHIQYNIVSRETLLDAKKHPDQYRDLVVRVAGYSAFFTALSPDAQDDIIARTE  
HML-----

>gi|16764205|ref|NP\_459820.1| putative pyruvate formate lyase [Salmonella  
typhimurium LT2]

-----MTQ  
LKLDTLSDRIK-----

-----AHK-----TAL-VHIVKPP-VCTERAQHY  
TEMYQQH-LDK-PIP-----VR---RALALAHHLAERTIWIKHD-ELIVGNQASE-VR  
AAPIFPEYT--VSWIEKEIDD--LADRPGA--G-----  
---FSVSEENKRILH--DVCPPW---RGQTVQDRCYGM---FTD-----  
-EQKGLL-----ATGIIKAEG--NMTSGD-----

-----AHLAVNFPLLL--EKGLYGLRDKVAERRSRINL-----TVLEDL---HGEQF  
LKAIDIVLDAVSQHITRFAALARQMAGEE-SRESRRKELLTIAENCEVIAHQPPQTFWQA  
LQLCYFIQLILQIESNGHS--VSFGRMDQYLYPYRRDVELN--QTL DREH-----AIEL  
LHSCWLK LLE-VNKI-RSGSHSKASAGSPLYQNV T---IGGQ-KLINGQPM DAVNPLSYA  
ILESCGRL-RSTQPNLSVRYH-AGMSNDFLDACVQVIR-CGFGMPAFNN-DEIVIPEFIK

-----L-----G-----IEPQDAYDYAAI-GCIE-----TAVGGK  
-----WGYRCTGMSFINF--ARVMLAALLEGGR---DATSGK-VF-----LP-QEK  
ALSAGNFNNFDEVMAAWDTQIRYYTRKSIEIEYVVDTML EENVHD--ILCSALVDDCIER  
AKSIKQ---GGAKY-----DWVSGL-QVGIANLGNSLA AVK KLVFEQGV I-GQQQLA--  
-----AALADDFD-----GLT-----

-----HEQLRQR-----  
-----LING--APKYGNDDSDVDTLLARAYQTYIDEL-KQY--HNP--RYGRG  
PVGNNYYAGTSSISA-NVPFGAATMATPDGRKAHTPLAE-GASPASGTDHLGPTAVIGS-  
-VGKLP T-GSILG-----GVLLNQKLNPTTLENESD--KQKLMVLLRTFFEV  
----HKGWHIQYNIVSRETLLDAKKHPDQYRDLVVRVAGYSAFFTALSPDAQDDIIARTE  
HML-----

>gi|157155776|ref|YP\_001462019.1| formate C-acetyltransferas [Escherichia coli  
E24377A]

-----MTT  
LKLDTLSDRIK-----

-----AHK-----NAL-VHIVKPP-VCTERAQHY  
TEMYQQH-LDK-PIP-----VR---RALALAHHLANRTIWIKHD-ELIIGNQASE-VR  
AAPIFPEYT--VSWIEKEIDD--LADRPGA--G-----  
---FAVSEENKRVLH--EMCPW---RGQTVQDRCYGM---FTD-----  
-EQKGLL-----ATGIIKAEG--NMTSGD-----

-----AHLAVNFPLLL--EKGLDGLREKVAERRSRINL-----TVLEDL---HGEQF  
LKAIDIVLVAVSEHIERFAALAREMAATE-TRESRRDELLTMAENCDLIAHQPPQTFWQA  
LQLCYFIQLILQIESNGHS--VSFGRMDQYLYPYRRDVELN--QTL DREH-----AIEM  
LHSCWLK LLE-VNKI-RSGSHSKASAGSPLYQNV T---IGGQ-NLVDGQPM DAVNPLSYA  
ILESCGRL-RSTQPNLSVRYH-AGMSNDFLDACVQVIR-CGFGMPAFNN-DEIVIPEFIK

SupplementalMultipleSequenceAlign.txt

```
-----L-----G----IEPQDAYDYAAI-GCIE-----TAVGGK
-----WGYRCTGMSFINF--ARVMLAALEGGR---DATSGK-VF-----LP-QEK
ALSAGNFNNFDEIMDAWDTQIRYYTRKSIEIEYVVDTMLEENVHD--ILCSALVDDCIER
AKSIKQ----GGAKY-----DWVSGL-QVGIANLGNSLAAVKKLVEFGAI-GQQQLA--
-----AALADDFD-----GLT-----
-----HEQLRQR-----
-----LING--APKYGNDDDDTVDTLLARAYQTYIDEL-KQY--HNP--RYGRG
PVGNNYYAGTSSISA-NVPFGAQTMATPDGRKAHTPLAE-GASPASGTDHLGPTAVIGS-
-VGKLP-AAILG-----GVLNQLNPNATLENESD--KQKLMILLRTFFEV
----HKGWHIQYNIVSRETLLEAKKHPDQYRDLVVRVAGYSAFFTALSPDAQDDIIARTE
HML-----
```

>gi|218699196|ref|YP\_002406825.1| putative glycy radical cofactor protein [Escherichia coli IAI39]

```
-----MTT
LKLDTLSDRIK-----
-----VHK-----NAL-VHIVKPP-VCTERAQHY
TGMYQQH-LDK-PIP-----VR---RALALAHHLANRTIWIKHD-ELIIGNQASE-VR
AAPIFPEYT--VSWIEKEIDD--LADRPGA--G-----
---FAVSEENKRVLH--EVCPPW---RGQTVQDRCYGM---FTD-----
-EQKGLL-----ATGIKAEG--NMTSGD-----
-----AHLAVNFPLLL--EKGLDGLREKVAERRSRINL-----TVLEDL---HGEQF
LKAIDIVLVAVSEHIERFAALAREMAATE-TRESRRDELLTIAENCDLIAHQPPQTFWQA
LQLCYFIQLILQIESNGHS--VSFGRMDQYLYPYRRDVELN--QTLDREH-----AIEM
LHSCWLKLLV-VNKI-RSGSHSKASAGSPLYQNVV---IGGQ-NLVDGQPMDAVNPLSYA
ILESCGRL-RSTQPNLSVRYH-AGMSNDFLDACVQVIR-CGFGMPAFNN-DEIVIPEFIK
-----L-----G----IEPQDAYDYAAI-GCIE-----TAVGGK
-----WGYRCTGMSFINF--ARVMLAALEGGR---DATSGK-VF-----LP-QEK
ALSAGNFNNFDEVMDAWDTQIRYYTRKSIEIEYVVDTMLEENVHD--ILCSALVDDCIER
AKSIKQ----GGAKY-----DWVSGL-QVGIANLGNSLAAVKKLVEFGAI-GQQQLA--
-----AALADDFD-----GLT-----
-----HEQLRQR-----
-----LING--APKYGNDDDDTVDTLLARAYQTYIDEL-KQY--HNP--RYGRG
PVGNNYYAGTSSISA-NVPFGAQTMATPDGRKAHTPLAE-GASPASGTDHLGPTAVIGS-
-VGKLP-AAILG-----GVLNQLNPNATLENESD--KQKLMILLRTFFEV
----HKGWHIQYNIVSRETLLEAKKHPDQYRDLVVRVAGYSAFFTALSPDAQDDIIARTE
HML-----
```

>gi|74311368|ref|YP\_309787.1| putative formate acetyltransferase [Shigella sonnei Ss046]

```
-----MTT
LKLDTLSDRIK-----
-----AHK-----NAL-VHIVKPP-VCTERAQHY
TEMYQQH-LDK-PIP-----VR---RALALAHHLANRTIWIKHD-ELIIGNQASE-VR
AAPIFPEYT--VSWIEKEIDD--LADRPGA--G-----
---FAVSEENKRVLH--EVCPPW---RGQTVQDRCYGM---FTD-----
-EQKGLL-----ATGIKAEG--NMTSGD-----
-----AHLAVNFPLLL--EKGLDGLREKVAERRSRINL-----TVLEDL---HGEQF
LKAIDIVLVAVSEHIERFAALAREMAATE-TRESRRDELLTIAENCDLIAHQPPQTFWQA
LQLCYFIQLILQIESNGHS--VSFGRMDQYLYPYRRDVELN--QTLDREH-----AIEL
LHSCWLKLLV-VNKI-RSGSHSKASAGSPLYQNVV---IGGQ-TLVDGQPMDAVNPLSYA
ILESCGRL-RSTQPNLSVRYH-AGMSNDFLDACVQVIR-CGFGMPAFNN-DEIVIPEFIK
-----L-----G----IEPQDAYDYAAI-GCIE-----TAVGGK
```

SupplementalMultipleSequenceAlign.txt

-----WGYRCTGMSFINF--ARVMLAALEGGR---DATSGK-VF-----LP-QEK  
ALSAGNFNNFDEVM DAWDTQIRYYTRKSIEIEYVVD TML EENVHD--ILCSALVDDCIER  
AKSIKQ----GGAKY-----DWVSGL-QVGIANLGNSLA AVK KLVFEQGAI-GQQQLA--  
-----AALADDFD-----GLT-----  
-----HEQLRQR-----  
-----LING--APKYGNDDDTVD TLLARAYQTYIDEL-KQY--HNP--RYGRG  
PVGNNYYAGTSSISA-NVPFQAQTMATPDGRKAHTPLAE-GASPASGTDHLGPTAVIGS-  
-VGKLP T-AAILG-----GVLLNQKLN PATLENESD--KQKLMILLRTFFEV  
----HKGWHIQYNIVSRETLL EAKKHPDQYRDLVVRVAGYSAFF TALSPDAQDDIIARTE  
HML-----

>gi|218548343|ref|YP\_002382134.1| putative glycy l radical cofactor protein  
[Escherichia fergusonii ATCC 35469]

-----MTT  
LKLD T L S D R I K-----

-----AHK-----NAL-VNIVKPP-VCTERAQHY  
TEMYQQH-LDK-PIP-----VR----RALALAHHLANRTIWIKHD-ELIIGNQASE-VR  
AAPIFPEYT--VSWIEKEIDD--LAD RPGA--G-----  
---FAVSEENKRV LH--EVC PWW-----RGQTVQDR CYGM---FTD-----  
-EQKGLL-----ATGI IKAEG--NMTSGD-----  
-----AHLAVNFPLLL--EKGLDGLREKVAERRSRINL-----TVLEDL---HGEQF  
LKAIDIVLVAVSEHIERFAALAREMAATE-PRESRRDELLAMAENCDLIAHQPPQTFWQA  
LQLCYFIQLILQIESNGHS--VSFGRMDQYLYPYRRDVELN--QTL DREH-----AIEM  
LHSCWLK LLE-VNKI-RSGSHSKASAGSPLYQNV T---IGGQ-NLVDGQPM DAVNPLSYA  
ILESCGRL-RSTQPNLSVRYH-AGMSNDFLDACVQVIR-CGFGMPAFNN-DEIVIPEFIK  
-----L-----G---IEPQDAYDYAAI-GCIE-----TAVGGK  
-----WGYRCTGMSFINF--ARVMLAALEGGR---DATSGK-VF-----LP-QEK  
ALSAGNFNNFDEVM DAWDTQIRYYTRKSIEIEYVVD TML EENVHD--ILCSALVDDCIER  
AKSIKQ----GGAKY-----DWVSGL-QVGIANLGNSLA AVK KLVFEQGAI-GQQQLA--  
-----AALADDFD-----GLT-----  
-----HEQLRQR-----  
-----LING--APKYGNDDDTVD TLLARAYQTYIDEL-KQY--HNP--RYGRG  
PIGGNNYYAGTSSISA-NVPFQAQTMATPDGRKAHTPLAE-GASPASGTDHLGPTAVIGS-  
-VGKLP T-AAILG-----GVLLNQKLN PATLENESD--KQKLMILLRTFFEV  
----HKGWHIQYNIVSRETLL EAKKHPDQYRDLVVRVAGYSAFF TALSPDAQDDIIARTE  
HML-----

>gi|82543268|ref|YP\_407215.1| putative formate acetyltransferase [Shigella boydii  
sb227]

-----MTT  
LKLD T L S D R I K-----

-----AHK-----NAL-VHIVKPP-VCTERAQHY  
TEMYQQH-LDK-PIP-----VR----RALALAHHLANRTIWIKHD-ELIIGNQASE-VR  
AAPIFPEYT--VSWIEKEIDD--LAD RPGA--G-----  
---FAVSEENKRV LH--EVC PWW-----RGQTVQDR CYGM---FTD-----  
-EQKGLL-----ATGI IKAEG--NMTSGD-----  
-----AHLAVNFPLLL--EKGLDGLREKVAERRSRINL-----TVLEDL---HGEQF  
LKAIDIVLVAVSEHIERFAALAREMAATE-TRESRRDELLAIAENCDLIAHQPPQTFWQA  
LQLCYFIQLILQIESNGHS--VSFGRMDQYLYPYRRDVELN--QTL DREH-----AIEL  
LHSCWLK LLE-VNKI-RSGSHSKASAGSPLYQNV T---IGGQ-TLVDGQPM DAVNPLSYA  
ILESCGRL-RSTQPNLSVRYH-AGMSNDFLDACVQVIR-CGFGMPAFNN-DEIVIPEFIK  
-----L-----G---IEPQDAYDYAAI-GCIE-----TAVGGK  
-----WGYRCTGMSFINF--ARVMLAALEGGR---DATSGN-VF-----LP-QEK



SupplementalMultipleSequenceAlign.txt

AKSIKQ----GGAKY-----DWVSGL-QVGIANLGNSLAAVKKLVFEQGVV-GQQQLA--  
-----AALADDFD-----GLP-----  
-----HEQLRQR-----  
-----LING--APKYGNDDSDVDTLLARAYQTYIDEL-KQY--HNP--RYGRG  
PVGGNYYAGTSSISA-NVPFGAATMATPDGRKAHTPLAE-GASPASGTDHLGPTAVIGS-  
-VGKLPV-GSILG-----GVLLNQKLNPTTLENESD--KQKLMVLLRTFFEV  
----HKGWHIQYNIVSRETLDDAKKHPDQYRDLVVRVAGYSAFFTALSPDAQDDIIARTE  
HML-----

>gi|16128791|ref|NP\_415344.1| predicted pyruvate formate lyase [Escherichia coli  
str. K-12 substr. MG1655]

-----MTT  
LKLDTLSDRIK-----

-----AHK-----NAL-VHIVKPP-VCTERAQHY  
TEMYQQH-LDK-PIP-----VR----RALALAHHLANRTIWIKHD-ELIIGNQASE-VR  
AAPIFPEYT--VSWIEKEIDD--LADRPGA--G-----  
---FAVSEENKRVLH--EVCPPW-----RGQTVQDRCYGM---FTD-----  
-EQKGLL-----ATGIIKAEG--NMTSGD-----  
-----AHLAVNFPLLL--EKGLDGLREEVAERRSRINL-----TVLEDL---HGEQF  
LKAIDIVLVAVSEHIERFAALAREMAATE-TRESRRELLAMAENCDLIAHQPPQTFWQA  
LQLCYFIQLILQIESNGHS--VSFGRMDQYLYPYRRDVELN--QTLDREH-----AIEM  
LHSCWLKLLLE-VNKI-RSGSHSKASAGSPYQNVV---IGGQ-NLVDGQPMDAVNPLSYA  
ILESCGRL-RSTQPNLSVRYH-AGMSNDFLDACVQVIR-CGFGMPAFNN-DEIVIPEFIK  
-----L-----G---IEPQDAYDYAAI-GCIE-----TAVGGK  
-----WGYRCTGMSFINF--ARVMLAALLEGH---DATSGK-VF-----LP-QEK  
ALSAGNFNNFDEVMDAWDTQIRYYTRKSIEIEYVVDTMLEENVHD--ILCSALVDDCIER  
AKSIKQ----GGAKY-----DWVSGL-QVGIANLGNSLAAVKKLVFEQGAI-GQQQLA--  
-----AALADDFD-----GLT-----  
-----HEQLRQR-----  
-----LING--APKYGNDDSDVDTLLARAYQTYIDEL-KQY--HNP--RYGRG  
PVGGNYYAGTSSISA-NVPFGAATMATPDGRKAHTPLAE-GASPASGTDHLGPTAVIGS-  
-VGKLPV-AAILG-----GVLLNQKLNPTTLENESD--KQKLMVLLRTFFEV  
----HKGWHIQYNIVSRETLDDAKKHPDQYRDLVVRVAGYSAFFTALSPDAQDDIIARTE  
HML-----

>gi|187733614|ref|YP\_001880989.1| formate C-acetyltransferase 3 [Shigella boydii CDC  
3083-94]

-----MTT  
LKLDTLSDRIK-----

-----AHK-----NAL-VHIVKPP-VCTERAQHY  
TEMYQQH-LDK-PIP-----VR----RALALAHHLANRTIWIKHD-ELIIGNQASE-VR  
AAPIFPEYT--VSWIEKEIDD--LADRPGA--G-----  
---FAVSEENKRVLH--EVCPPW-----RGQTVQDRCYGM---FTD-----  
-EQKGLL-----ATGIIKAEG--NMTSGD-----  
-----AHLAVNFPLLL--EKGLDGLREKVAERRSRINL-----TVLEDL---HGEQF  
LKAIDIVLVAVSEHIERFAALAREMAATE-TRESRRELLAIAENCDLIAHQPPQTFWQA  
LQLCYFIQLILQIESNGHS--VSFGRMDQYLYPYRRDVELN--QTLDREH-----AIEM  
LHSCWLKLLLE-VNKI-RSGSHSKASAGSPYQNVV---IGGQ-TLVDGQPMDAVNPLSYA  
ILESCGRL-RSTQPNLSVRYH-AGMSNDFLDACVQVIR-CGFGMPAFNN-DEIVIPEFIK  
-----L-----G---IEPQDAYDYAAI-GCIE-----TAVGGK  
-----WGYRCTGMSFINF--ARVMLAALLEGH---DATSGN-VF-----LP-QEK  
ALSAGNFNNFDEVMDAWDTQIRYYTRKSIEIEYVVDTMLEENVHD--ILCSALVDDCIER  
AKSIKQ----GGAKY-----DWVSGL-QVGIANLGNSLAAVKKLVFEQGTI-GQQQLA--

SupplementalMultipleSequenceAlign.txt

-----AALADDFD-----GLT-----  
-----HEQLRQR-----  
-----LING--APKYGNDDDTVDTLARAYQTYIDEL-KQY--HNP--RYGRG  
PVGGNYYAGTSSISA-NVPFGAQTMATPDGRKAHTPLAE-GASPASGTDHLGPTAVIGS-  
-VGKLP-T-AAILG-----GVLLNQKLNPATLENESD--KQKLMILLRTFFEV  
----HKGWHIQYNIVSRETLLLEAKKHPDQYRDLVVRVAGYSAFFTALSPDAQDDIIARTE  
HML-----

>gi|170020822|ref|YP\_001725776.1| pyruvate formate-lyase [Escherichia coli ATCC 8739]

-----MTT  
LKLDTLSDRIK-----

-----AHK-----NAL-VHIVKPP-VCTERAQHY  
TEMYQQH-LDK-PIP-----VR-----RALALAHHLANRTIWIKHD-ELIIGNQASE-VR  
AAPIFPEYT--VSWIEKEIDD--LADRPGA--G-----  
---FAVSEENKRVLH--EVCPPW----RGQTVQDRCYGM---FTD-----  
-EQKGLL-----ATGIIKAEG--NMTSGD-----  
-----AHLAVNFPLLL--EKGLDGLREKVAERRSRINL-----TVLEDL---HGEQF  
LKAIDIVLVAVSEHIERFAALAREMAATE-TRESRDELLAIAENCDLIAHQPPQTFWQA  
LQLCYFIQLILQIESNGHS--VSFGRMDQYLYPYRRDVELK--QTLDREH-----AIEL  
LHSCWLKLLLE-VNKI-RSGSHSKASAGSPLYQNVV---IGGQ-NLVDGQPMDAVNPLSYA  
ILESCGRL-RSTQPNLSVRYH-AGMSNDFLDACVQVIR-CGFGMPAFNN-DEIVIPEFIK  
-----L-----G---IEPQDAYDYAAI-GCIE-----TAVGGK  
-----WGYRCTGMSFINF--ARVMLAALEGGR---DATSGK-VF-----LP-QEK  
ALSAGNFNNFDEVMDAWDTQIRYYTRKSIEIEYVVDTMLEENVHD--ILCSALVDDCIER  
AKSIKQ----GGAKY-----DWVSGL-QVGIANLGNLSAAVKKLVFEQGAI-GQQQLA--  
-----AALADDFE-----GLT-----

-----HEQLRQR-----  
-----LING--APKYGNDDDTVDMLLARAYQTYIDEL-KQY--HNP--RYGRG  
PVGGNYYAGTSSISA-NVPFGAQTMATPDGRKAHTPLAE-GASPASGTDHLGPTAVIGS-  
-VGKLP-T-AAILG-----GVLLNQKLNPATLENESD--KQKLMILLRTFFEV  
----HKGWHIQYNIVSRETLLLEAKKHPDQYRDLVVRVAGYSAFFTALSPDAQDDIIARTE  
HML-----

>gi|110804822|ref|YP\_688342.1| putative formate acetyltransferase [Shigella flexneri 5 str. 8401]

-----MTT  
LKLDTLSDRIK-----

-----AHK-----NAL-VHIVKPP-VCTERAQHY  
TEMYQQH-LDK-PIP-----VR-----RALALAHHLANRTIWIKHD-ELIIGNQASE-VR  
AAPIFPEYT--VSWIEKEIDD--LADRPGA--G-----  
---FAVSEENKRVLH--EVCPPW----RGQTVQDRCYGM---FTD-----  
-EQKGLL-----ATGIIKAEG--NMTSGD-----  
-----AHLAVNFPLLL--EKGLDGLREKVAERRSRINL-----TVLEDL---HGEQF  
LKAIDIVLVAVSEHIERFAALARAMAATE-TRESRDELLAMAENCDLIAHQPPQTFWQA  
LQLCYFIQLILQIESNGHS--VSFGRMDQYLYPYRRDVELN--QTLDREH-----AIEL  
LHSCWLKLLLE-VNKI-RSGSHSKASAGSPLYQNVV---IGGQ-NLVDGQPMDAVNPLSYA  
ILESCGRL-RSTQPNLSVRYH-AGMSNDFLDACVHVIR-CGFGMPAFNN-DEIVIPEFIK  
-----L-----G---IEPQDAYDYAAI-GCIE-----TAVGGK  
-----WGYRCTGMSFINF--ARVMLAALEGGR---DATSGK-VF-----LP-QEK  
ALSAGNFNNFDEVMDAWDTQIRYYTRKSIEIEYVVDTMLEENVHD--ILCSALVDDCIER  
AKSIKQ----GGAKY-----DWVSGL-QVGIANLGNLSAAVKKLVFEQGAI-GQQQLA--  
-----AALADDFD-----GLT-----

SupplementalMultipleSequenceAlign.txt

-----HEQLRQR-----  
-----LING--APKYGNDDDTVDTLARAYQTYIDEL-KQY--HNP--RYGRG  
PVGGNYYAGTSSISA-NVPFGAQTMATPDGRKAHTPLAE-GASPASGTDHLGPTAVIGS-  
-VGKLP- AAILG-----GVLLNQKLNPATLENESD--KQKLMILLRTFFEV  
----HKGWHIQYNIVSRETLL EAKKHPDQYRDLVVRVAGYSAFFTALSPDAQDDIIARTE  
HML-----  
>gi|170680406|ref|YP\_001742928.1| formate C-acetyltransferase 3 [Escherichia coli  
SMS-3-5]

-----MTT  
LKLDTLSDRIK-----

-----AHK-----NAL-VHIVKPP-VCTERAQHY  
TEMYQQH-LDK-PIP-----VR----RALALAHHLANRTIWIKHD-ELIIGNQASE-VR  
AAPIFPEYT--VSWIEKEIDD--LADPGA--G-----  
---FAVSEENKRVLH--EVCPPW-----RGQTVQDRCYGM---FTD-----  
-EQKGLL-----ATGIIKAEG--NMTSGD-----  
-----AHLAVNFPLLL--EKGLDGLREKVAERRSRINL-----TVLEDL---HGEQF  
LKAIDIVLVAVSEHIERFAALAREMAATE-TRESRRDELLTIAENCDLIAHQPPQTFWQA  
LQLCYFIQLILQIESNGHS--VSFGRMDQYLYPYRRDVELN--QTLDREH-----AIEM  
LHSCWLKLL E-VNKI-RSGSHSKASAGSPYQNV T---IGGQ-NLVDGQPM DAVNPLSYA  
LLESCGRL-RSTQPNLSVRYH-AGMSNDFLDACVQVIR-CGFGMPAFNN-DEIVIPEFIK  
-----L-----G---IEPQDAYDYAAI-GCIE-----TAVGGK  
----WGYRCTGMSFINF--ARVMLAAL EGGR---DATSGK-VF-----LP-QEK  
ALSAGSFNNFDEVMDAWDTQIRYYTRKSIEIEYVVD TML EENVHD--ILCSALVDDCIER  
AKSIKQ---GGAKY---DWVSGL-QVGIANLGNSLA AVK KLVFEQGAI-GQQQLA--  
-----AALADDFD-----GLT-----

-----HEQLRQR-----  
-----LING--APKYGNDDDTVDTLARAYQTYIDEL-KQY--HNP--RYGRG  
PVGGNYYAGTSSISA-NVPFGAQTMATPDGRKAHTPLAE-GASPASGTDHLGPTAVIGS-  
-VGKLP- AAILG-----GVLLNQKLNPATLENESD--KQKLMILLRTFFEV  
----HKGWHIQYNIVSRETLL EAKKHPDQYRDLVVRVAGYSAFFTALSPDAQDDIIARTE  
HML-----  
>gi|218704245|ref|YP\_002411764.1| putative glycy radical cofactor protein  
[Escherichia coli UMN026]

-----MTT  
LKLDTLSDRIK-----

-----AHK-----NAL-VHIVKPP-VCTERAQHY  
TEMYQQH-LDK-PIP-----VR----RALALAHHLANRTIWIKHD-ELIIGNQASE-VR  
AAPIFPEYT--VSWIEKEIDD--LADPGA--G-----  
---FAVSEENKRVLH--EVCPPW-----RGQTVQDRCYGM---FTD-----  
-EQKGLL-----ATGIIKAEG--NMTSGD-----  
-----AHLAVNFPLLL--EKGLDGLREKVAERRSRINL-----TVLEDL---HGEQF  
LKAIDIVLVAVSEHIERFAALAREMAATE-TRESRRDELLAMAENCDLIAHQPPQTFWQA  
LQLCYFIQLILQIESNGHS--VSFGRMDQYLYPYRRDVELN--QTLDREH-----AIEM  
LHSCWLKLL E-VNKI-RSGSHSKASAGSPYQNV T---IGGQ-NLVDGQPM DAVNPLSYA  
LLESCGRL-RSTQPNLSVRYH-AGMSNDFLDACVQVIR-CGFGMPAFNN-DEIVIPEFIK  
-----L-----G---IEPQDAYDYAAI-GCIE-----TAVGGK  
----WGYRCTGMSFINF--ARVMLAAL EGGR---DATSGK-VF-----LP-QEK  
ALSAGNFNNFDEVMDAWDTQIRYYTRKSIEIEYVVD TML EENVHD--ILCSALVDDCIER  
AKSIKQ---GGAKY---DWVSGL-QVGIANLGNSLA AVK KLVFEQGAI-GQQQLA--  
-----AALADDFD-----GLT-----

-----HEQLRQR-----







SupplementalMultipleSequenceAlign.txt

----HKGWHIQYNIVSRETLLDAKKHPDQYRDLVVRVAGYSAFFTALSPDAQDDIIARTE  
HML-----  
>gi|82776090|ref|YP\_402437.1| putative formate acetyltransferase [Shigella  
dysenteriae Sd197]

-----MTT  
LKLDTLSDRIK-----  
-----AHK-----NAL-VHIVKPP-VCTERAQHY  
TEMYQQH-LDK-PIP-----VR----RALALAHHLANRTIWIKHD-ELIIGNQASE-VR  
AAPIFPEYT--VSWIEKEIDD---LADRPGA--G-----  
---FAVSEENKRVLH--EVCPPW---RGQTVQDRCYGM---FTD-----  
-EQKGLL-----ATGIIKAEG--NMTSGD-----  
-----AHLAVNFPLLL--EKGLDGLREKVAERRSRINL-----TVLEDL---HGEQF  
LK AIDIVLVAVSEHIERFAALAREMAATE-TRESRRDELLAMAENCDLIAHQPPQTFWQA  
LQLCYFIQLILQIESNGHS--VSFGRMDQYLYPYRRDVELK--QTL DREH-----AIEL  
LHSCWLKLL E-VNKI-RSGSHSKASAGSPYQNV T---IGGQ-NLVDGQPM DAVNPLSYA  
ILESCGRL-RSTQPNLSVRYH-AGMSNDFLDACVQVIR-CGFGMPAFNN-DEIVIPEFIK  
-----L-----G---IEPQDAYDYAAI-GCIE-----TAVGGK  
-----WGYRCTGMSFINF--ARVMLAAL EGG R---DATSGK-VF-----LP-QEK  
ALSAGNFNNFDEVMDAWDTQIRYYTRKSIEIEYVVD TML EENVHD--ILCSALVDDCIER  
AKSIKQ---GGAKY-----DWVSGL-QVGIANLGNSLA AVK KLVFEQGI- GQQQLA--  
-----AALADDFD-----GLT-----  
-----HEQLRQR-----  
-----LING--APKYGNDDDTVDTLLARAYQTYIDEL-KQY--HNP--RYGRG  
PVGNNYYAGTSSISA-NVPFGAQT MATPDGRKAHTPLAE-GASPASGTDHLGPTAVIGS-  
-VGKLP T-AAILG-----GVLLNQKLN PATLE NESD--KQKLMILLRTFFEV  
---HKGWHIQYNIVSRETLL EAKKHPDQYRDLVVRVAGYSAFFTALSPEAQNDIIARTE  
HML-----

>gi|123441008|ref|YP\_001004997.1| putative formate acetyltransferase [Yersinia  
enterocolitica subsp. enterocolitica 8081]

-----MTT  
LDLVTL SERTK-----  
-----QHK-----NAL-IHIVKPP-VCTERAVHY  
TEVYQQH-QDK-PLS-----VR----RALALAHHLQORTIWIKN D-ELIIGNQASQ-LR  
AAPIFPEYT--VSWIESEIDE---LADRPGA--G-----  
---FSVSEEDKAVLH--QLCPW---RGQTVQDRCYGM---FTD-----  
-EQKALL-----ATGIIKAEG--NMTSGD-----  
-----AHLAVNFPLLL--EKGLDGLRSKVT SRRSRLQL-----TDWSDL---HKEQF  
LK AIDISLAALSEHIERYAAVARQMAQEE-TRDWRRVELQKIAENCDLIAHQPPQTFWQA  
LQLCYFIQLILQIESNGHS--VSFGRLDQYLYPWYRRDVELE--NTLSREQ-----AIEM  
LHSCWLKLL E-VNKI-RSGSHSKASAGSPYQNV T---IGGQ-KLVQKSIDAVNPLSYA  
VLESCGRL-RSTQPNLSVRYH-AGISDDFLDACVQVIR-CGFGMPAFNN-DEIVIPEFIK  
-----L-----G---VEPQDAYDYAAI-GCIE-----TAVGGK  
-----WGYRCTGMSFINF--ARVMLAAL EQR---DATSGQ-VF-----LP-QEQ  
GLSKGNFSDFSQVMAQWDAQIRYYTRKSIEIECVVD T VLEENAHD--IVCSALVDDCIER  
GKSIKQ---GGARY-----DWVSGL-QVGIANLGNSLA AVR KLVFEQQLI- SQQQLA--  
-----TALANDFA-----GLN-----  
-----GEQLRQH-----  
-----LINS--APKYGNVDVDDVQLLV RAYQTYIDEL-KQY--HNT--RFGRG  
PIGGTYYAGTSSISA-NVPFGAAT MATPDGRKAHSPLAE-GASPASGTDHLGPTAVFNS-  
-LSKLP T-ASILG-----GVLLNQKLN PSTLDNPRD--REKLMMLRTFFEE  
----YLGWHVQYNIVSRETLL EAKQHPDRYRDLVVRVAGYSAFFTALSPDAQDDIIARTE







SupplementalMultipleSequenceAlign.txt

-----MTEAKN  
PYFGTLTERMH-----  
-----RYS-----EAV-LD-KKPY-IDAERAILA  
TEAYKKH-QNK-PSN-----LK----RAYMLQNILENMTIYIEDE-SLIAGNQASS-NK  
DAPIFPEYT--LEFVLNELDL---FEKRDGD--V-----  
---FYITEETKQQLR--ELAPFW----ENNLRARCGVL---LPE-----  
-EVQVYM-----ETGFFGMEG--KMNSGD-----  
-----AHLAVNYQKLL--EVGLKGFEEERTRAAKAALDL-----TIPESI---DKYHF  
YDSVLIVIAAVKAYAERYAKLARELAKTA--DPERQTELLEIARICDKVPYQPAETFAEA  
VQSVWFIQCILQIESNGHS--LSYGRFDQYMPYAKADLE-A--GRETEDS-----IVER  
LTNLWIKTLT-INKV-RSQAHTFSSAGSPYQNVNT---IGGQ-TR-DKQ--DAVNPLSYL  
VLRSAQT-KLPQPNLTVRYH-KGLDNRFMNECIEVMK-LGFGMPAMNN-DEIIIPSF  
-----K-----G---VLEEDAYDYSAI-GCVE-----TAVPGK  
-----WGYRCTGMSYINF--PKILLITMNDGI---DPASGK-RF-----AT-GHG  
HFK--DMTSYDELKAAWDATLREITRMSVIVENAIDLGLEREVPD--ILCSALTDDCIGR  
GKTLKE---GGAVY-----DYISGL-QVGIANLSDSLAALKKLVFEEGRL-TTDELW--  
-----HALETDF-----GER-----  
-----GEEIRQM-----  
-----LIND--APKYGNDDDYADSLVVEAYDTYIDEI-ACY--PNT--RYGRG  
PIGGIRYSGTSSISA-NVGQKGKGLATPDGRHAGTPLAE-GCSPEHSMDDKKGPTSVLKS-  
-VAKLPT-DEIVG-----GVLLNQKVNQTLAKEED--KMKLMALLRTFFNR  
----LHGYHIQYNVVSRETLLIDAQKNPEKHRDLIVRVAGYSAFFNVLSKATQDDIIERTE  
HTL-----

>gi|94993274|ref|YP\_601373.1| formate acetyltransferase [Streptococcus pyogenes  
MGAS2096]

-----MTETKS  
PYFGHLTDRMT-----  
-----HYR-----EAV-LD-KKPY-IDAERAILA  
TEAYQKH-QNK-PAN-----LK----RAYMLQTIENMTIYIEDE-SLIAGNQASS-NK  
DAPIFPEYT--LEFVLNELDL---FEKRDGD--V-----  
---FYITEETKQQLR--DIAPFW----ENNLRARCGVL---LPE-----  
-EVQVYM-----ETGFFGMEG--KMNSGD-----  
-----AHLAVNYQKLL--EHGLKGFEEERARAACAALDL-----TIPENI---DKYHF  
YDSVFIVIDAVKTYAKRYAKLARELAKTA--KPERQAELLDIARICDKVPYEPAKTFAEA  
VQSVWFIQCILQIESNGHS--LSYGRFDQYMPYVVKADLE-A--GRETEAS-----IVER  
LTNLWIKTLT-INKV-RSQAHTFSSAGSPYQNVNT---IGGQ-TR-DKK--DAVNPLSYL  
VLRSAQT-KLPQPNLTVRYH-KGLDNTFMNECIEVMK-LGFGMPAMNN-DEIIIPSF  
-----K-----G---VSEEDAYDYSAI-GCVE-----TAVPGK  
-----WGYRCTGMSYINF--PKILLITMNDGI---DPASGK-RF-----AK-GHG  
HFK--DMTSYEELKAAWDATLREITRMSVIVENAIDLGLEREVPD--ILCSALTDDCIGR  
GKTLKE---GGAVY-----DYISGL-QVGIANLSDSLAALKKLVFEEGQL-TPEELW--  
-----QALESDFA-----GER-----  
-----GEEIRQM-----  
-----LIND--APKYGNDDDYADSLVVEAYDTYIDEI-ACY--PNT--RYGRG  
PIGGIRYSGTSSISA-NVGQKGKGLATPDGRHAGTPLAE-GCSPEHSMDDKKGPTSVLKS-  
-VAKLPT-DEIVG-----GVLLNQKVNQTLAKEED--KLKLMALLRTFFNR  
----LHGYHIQYNVVSRETLLIDAQKHPEKHRDLIVRVAGYSAFFNVLSKATQDDIIERTE  
HTL-----

>gi|50915089|ref|YP\_061061.1| formate acetyltransferase [Streptococcus pyogenes  
MGAS10394]

SupplementalMultipleSequenceAlign.txt

```
-----MTETKI
PYFGHLTDRMT-----
-----HYR-----EAV-LD-KKPY-IDAERAILA
TEAYQKH-QNK-PAN-----LK-----RAYMLQTILENMTIYIEDE-SLIAGNQASS-NK
DAPIFPEYT--LEFVLNELDL---FEKRDGD--V-----
---FYITEETKQQLR--DIAPFW-----ENNLRARCGVL---LPE-----
-EVQVYM-----ETGFFGMEG--KMNSGD-----
-----AHLAVNYQKLL--EHGLKGFEEARARAACAALDL-----TIPENI---DKYHF
YDSVFIVIDAVKTYAKRYAKLARELAETA--SPERQAELLDIACICDKVPYEPAAATFAEA
VQSVWFIQCILQIESNGHS--LSYGRFDQYMPYVKADLE-A--GRETEDT-----IVER
LTNLWIKTLT-INKV-RSQAHTFSSAGSPYQNVNT---IGGQ-TR-DKK--DAVNPLSYL
VLRVAQT-KLPQPNLTVRYH-KGLDNTFMNECIEVMK-LGFGMPAMNN-DEIIIPSEFIK
-----K-----G---VSEEDAYDYSAI-GCVE-----TAVPGK
-----WGYRCTGMSYINF--PKILLITMNDGI---DPASGK-RF-----AK-GHG
HFK--DMTSYEELKAAWDATLREITRMSVIVENAIDLGLEREVPD--ILCSALTDDCIGR
GKTLKE---GGAVY-----DYISGL-QVGIANLSDSLAALKKLVFEEGQL-TPEELW--
-----HALESDF-----GER-----
-----GEEIRQM-----
-----LIND--APKYGNDDDYADSLVVEAYDTYIDEI- AKY--PNT--RYGRG
PIGGIRYSGTSSISA-NVGQKGKGLATPDGRHAGTPLAE-GCSPEHSMDDKKGPTSVLKS-
-VAKLPT-DEIVG-----GVLLNQKVNQPQLAKEED--KLKLMALLRRTFFNR
---LHGYHIQYNVVSRETLIDAQKHPEKHRDLIVRVAGYSAFFNVLSKATQDDIIERTE
HTL-----
>gi|19746932|ref|NP_608068.1| putative pyruvate formate-lyase 2 [Streptococcus
pyogenes MGAS8232]
```

```
-----MTETKS
PYFGHLTDRMT-----
-----HYR-----EAV-LD-KKPY-IDAERAILA
TEAYQKH-QNK-PAN-----LK-----RAYMLQTILENMTIYIEDE-SLIAGNQASS-NK
DAPIFPEYT--LEFVLNELDL---FEKRDGD--V-----
---FYITEETKQQLR--DIAPFW-----ENNLRARCGVL---LPE-----
-EVQVYM-----ETGFFGMEG--KMNSGD-----
-----AHLAVNYQKLL--EHGLKGFEEARARAACAALDL-----TIPENI---DKYHF
YDSVFIVIDAVKTYAKRYAQLARELAETA--SPERQAELLDIACICDKVPYEPAAATFAEA
VQSVWFIQCILQIESNGHS--LSYGRFDQYMPYVKADLE-A--GRETEDT-----IVER
LTNLWIKTLT-INKV-RSQAHTFSSAGSPYQNVNT---IGGQ-TR-DKK--DAVNPLSYL
VLRVAQT-KLPQPNLTVRYH-KGLDNTFMNECIEVMK-LGFGMPAMNN-DEIIIPSEFIK
-----K-----G---VSEEDAYDYSAI-GCVE-----TAVPGK
-----WGYRCTGMSYINF--PKILLITMNDGI---DPASGK-RF-----AK-GHG
HFK--DMTSYEELKAAWDATLREITRMSVIVENAIDLGLEREVPD--ILCSALTDDCIGR
GKTLKE---GGAVY-----DYISGL-QVGIANLSDSLAALKKLVFEEGRL-TPEELW--
-----QALESDF-----G-----
-----ERGEIRQM-----
-----LIND--APKYGNDDDYADSLVVEAYDTYIDEI- AKY--PNT--RYGRG
PIGGIRYSGTSSISA-NVGQKGKGLATPDGRHAGTPLAE-GCSPEHSMDDKKGPTSVLKS-
-VAKLPT-DEIVG-----GVLLNQKVNQPQLAKEED--KLKLMALLRRTFFNR
---LHGYHIQYNVVSRETLIDAQKHPEKHRDLIVRVAGYSAFFNVLSKATQDDIIERTE
HTL-----
>gi|21911285|ref|NP_665553.1| putative pyruvate formate-lyase [Streptococcus
pyogenes MGAS315]
```

SupplementalMultipleSequenceAlign.txt

-----MTETKS  
PYFGHLTDRMT-----  
-----HYR-----EAV-LD-KKPY-IDAERAILA  
TEAYQKH-QNK-PAN-----LK-----RAYMLQTILENMTIYIEDE-SLIAGNQASS-NK  
DAPIFPEYT--LEFVLNELDL--FEKRDGD--V-----  
---FYITEETKQQLR--DIAPFW-----ENNNLRARCGVL---LPE-----  
-EVQVYM-----ETGFFGMEG--KMNSGD-----  
-----AHLAVNYQKLL--EHGLKGFEERARAACAALDL-----TIPENI---DKYHF  
YDSVFIVIDAVKTYAKRYAKLARELAKTA--KPERQAELLDIARICDKVPYEPAKTFAEA  
VQSVWFIQCILQIESNGHS--LSYGRFDQYMPYVKADLE-A--GRETEDS-----IVER  
LTNLWIKTLT-INKV-RSQAHTFSSAGSPLYQNVV---IGGQ-TR-DKK--DAVNPLSYL  
VLRSAQT-KLPQPNLTVRYH-KGLDNTFMNECIEVMK-LGFGMPAMNN-DEIIIPSFIK  
-----K-----G---VSEEDAYDYSAI-GCVE-----TAVPGK  
-----WGYRCTGMSYINF--PKILLITMNDGI---DPASGK-RF-----AK-GHG  
HFK--DMTSYEELKAAWDATLREITRMSVIVENAIDLGLEREVPD--ILCSALTDDCIGR  
GKTLKE----GGAVY-----DYISGL-QVGIANLSDSLAALKKLVFEEGQL-TPEELW--  
-----QALESDFA-----G-----  
-----ERGEEIRQM-----  
-----LIND--APKYGNDDDYADSLVVEAYDTYIDEI-AKY--PNT--RYGRG  
PIGGIRYSGTSSISA-NVGQKGKGLATPDGRHAGTPLAE-GCSPEHSMDDKKGPTSVLKS-  
-VAKLPT-DEIVG-----GVLLNQKVNQPTLAKEED--KLKLMALLRTFFNR  
----LHGYHIQYNVVSRETLIDAQKHPEKHRDLIVRVAGYSAFFNVLSKATQDDIIERTE  
HTL-----

>gi|15675819|ref|NP\_269993.1| putative pyruvate formate-lyase 2 [Streptococcus  
pyogenes M1 GAS]

-----MTETKS  
PYFGHLTDRMT-----  
-----HYR-----EAV-LD-KKPY-IDAERAILA  
TEAYQKH-QNK-PAN-----LK-----RAYMLQTILENMTIYIEDE-SLIAGNQASS-NK  
DAPIFPEYT--LEFVLNELDL--FEKRDGD--V-----  
---FYITEETKQQLR--DIAPFW-----ENNNLRARCGVL---LPE-----  
-EVQVYM-----ETGFFGMEG--KMNSGD-----  
-----AHLAVNYQKLL--EHGLKGFEERARAACAALDL-----TIPENI---DKYHF  
YDSVFIVIDAVKTYAKRYAKLARELAKTA--KPERQAELLDIARICDKVPYEPAKTFAEA  
VQSVWFIQCILQIESNGHS--LSYGRFDQYMPYVKADLE-A--GRETEDT-----IVER  
LTNLWIKTLT-INKV-RSQAHTFSSAGSPLYQNVV---IGGQ-TR-DKK--DAVNPLSYL  
VLRSAQT-KLPQPNLTVRYH-KGLDNTFMNECIEVMK-LGFGMPAMNN-DEIIIPSFIK  
-----K-----G---VSEEDAYDYSAI-GCVE-----TAVPGK  
-----WGYRCTGMSYINF--PKILLITMNDGI---DPASGK-RF-----AK-GHG  
HFK--DMTSYEELKAAWDATLREITRMSVIVENAIDLGLEREVPD--ILCSALTDDCIGR  
GKTLKE----GGAVY-----DYISGL-QVGIANLSDSLAALKKLVFEEGRL-TPEELW--  
-----KALESDFA-----GER-----  
-----GEDIRQM-----  
-----LIND--APKYGNDDDYADSLVVEAYDTYIDEI-AKY--PNT--RYGRG  
PIGGIRYSGTSSISA-NVGQKGKGLATPDGRHAGTPLAE-GCSPEHSMDDKKGPTSVLKS-  
-VAKLPT-DEIVG-----GVLLNQKVNQPTLAKEED--KLKLMALLRTFFNR  
----LHGYHIQYNVVSRETLIDAQKHPEKHRDLIVRVAGYSAFFNVLSKATQDDIIERTE  
HTL-----

>gi|225871371|ref|YP\_002747318.1| formate acetyltransferase [Streptococcus equi  
subsp. equi 4047]



SupplementalMultipleSequenceAlign.txt

-----MTEAKN  
PYFGTLTERMH-----  
-----RYP-----EAV-LD-KKPY-IDAERAILA  
TEAYQKH-QNK-PSN-----LK-----RAYMLQNILENMTIYIEDE-SLIAGNQASS-NK  
DAPIFPEYT--LEFVLNELDL---FEKRDGD--V-----  
---FYITEETKQQLR--ELAPFW---ENNNLRARCGVL---LPK-----  
-EVQVYM-----ETGFFGMEG--KMNSGD-----  
-----AHLAVNYQKLL--EVGLKGFEEERTRAAKAALDL-----TIPESI---DKYHF  
YDSVLIVIAAVKAYAERYAKLARELAKTA--NPERQAELLEIARICDKVPYQPAETFAEA  
VQSVWFIQCILQIESNGHS--LSYGRFDQYMPYAKADLE-A--GRETEDS-----IVER  
LINLWIKTLT-INKV-RSQAHTFSSAGSPLYQNVV---IGGQ-TR-DKQ--DAVNPLSYL  
VLRVAQT-KLPQPNLTVRYH-KGLDNTFMNECIEVMK-LGFGMPAMNN-DEIIIPSF  
IK-----K-----G---VLEEDAYDYSAI-GCVE-----TAVPGK  
-----WGYRCTGMSYINF--PKILLITMNDGI---DPASGK-RF-----AT-GHG  
HFK--DMTSYDELKAAWDATLREITRMSVIVENAIDLGLEREVPD--ILCSALTDDCIGR  
GKTLKE---GGAVY-----DYISGL-QVGIANLSDSLAALKKLVFEEGRL-TTDELW--  
-----HALETDA-----GER-----  
-----GEEIRQM-----  
-----LIND--APKYGNDDDYADSLVVEAYDTYIDEI-AKY--PNT--RYGRG  
PIGGIRYSGTSSISA-NVGQKGKGLATPDGRHAGTPLAE-GCSPEHSMDKKGPTSVLKS-  
-VAKLPT-DEIVG-----GVLLNQKVNQPQLAKEED--KMKLMALLRTFFNR  
---LHGYHIQYNVVSRETLLIDAQKNPEKHRDLIVRVAGYSAFFNVLSKATQDDIIERTE  
HTL-----  
>gi|94991321|ref|YP\_599421.1| formate acetyltransferase [Streptococcus pyogenes  
MGAS10270]

-----MIETKS  
PYFGHLTDRMA-----  
-----HYR-----EAV-LD-KKPY-IDAERAILA  
TEAYQKH-QNK-PAN-----LK-----RAYMLQTIENMTIYIEDE-SLIAGNQASS-NK  
DAPIFPEYT--LEFVLNELDL---FEKRDGD--V-----  
---FYITEETKQQLR--DIAPFW---ENNNLRARCGVL---LPE-----  
-EVQVYM-----ETGFFGMEG--KMNSGD-----  
-----AHLAVNYQKLL--EHGLKGFEEERARAACAALDL-----TIPENI---DKYHF  
YDSVFIVIDAVKTYAKRYAKLARELAKTA--KPERQAELLDIARICDKVPYEPAKTFAEA  
VQSVWFIQCILQIESNGHS--LSYGRFDQYMPYVYKADLE-A--GRETEDT-----IVER  
LTLNLWIKTLT-INKV-RSQAHTFSSAGSPLYQNVV---IGGQ-TR-DKK--DAVNPLSYL  
VLRVAQT-KLPQPNLTVRYH-KGLDNTFMNECIEVMK-LGFGMPAMNN-DEIIIPSF  
IK-----K-----G---VSEEDAYDYSAI-GCVE-----TAVPGK  
-----WGYRCTGMSYINF--PKILLITMNDGI---DPASGK-RF-----AK-GHG  
HFK--DMTSYEELKAAWDATLREITRMSVIVENAIDLGLEREVPD--ILCSALTDDCIGR  
GKTLKE---GGAVY-----DYISGL-QVGIANLSDSLAALKKLVFEEGQL-TPEELW--  
-----HALESDF-----GER-----  
-----GEDIRQM-----  
-----LIND--APKYGNDDDYADSLVVEAYDTYIDEI-AKY--PNT--RYGRG  
PIGGIRYSGTSSISA-NVGQKGKGLATPDGRHAGTPLAE-GCSPEHSMDKKGPTSVLKS-  
-VAKLPT-DEIVG-----GVLLNQKVNQPQLAKEED--KLKLMALLRTFFNR  
---LHGYHIQYNVVSRETLLIDAQKHPEKHRDLIVRVAGYSAFFNVLSKATQDDIIERTE  
HTL-----  
>gi|209560173|ref|YP\_002286645.1| Putative pyruvate formate lyase 3 [Streptococcus  
pyogenes NZ131]

SupplementalMultipleSequenceAlign.txt

-----MTETKS  
PYFGHLTDRMT-----

-----HYR-----EAV-LD-KKPY-IDAERAILA  
TEAYQKH-QNK-PAN-----LK-----RAYMLQTIENMTIYIEDE-SLIAGNQASS-NK  
DAPIFPEYT--LEFVLNELDL---FEKRDGD--V-----  
---FYITEETKQQLR--DIAPFW-----ENNNLRARCGVL---LPE-----  
-EVQVYM-----ETGFFGMEG--KMNSGD-----  
-----AHLAVNYQKLL--EHGLKGFEEERARAACAALDL-----TIPENI---DKYHF  
YDSVFIVIDAVKTYAKRYAKLARELAETA--SPERQAELLEIARICDKVPYEPAAETFAEA  
VQSVWFIQCILQIESNGHS--LSYGRFDQYMPYVKADLE-A--GRETEAS-----IVER  
LTNLWIKTLT-INKV-RSQAHTFSSAGSPLYQNVV---IGGQ-TR-DKK--DAVNPLSYL  
VLRVAQT-KLPQPNLTVRYH-KGLDNTFMNECIEVMK-LGFGMPAMNN-DEIIIPSEFIK  
-----K-----G---VSEEDAYDYSAI-GCVE-----TAVPGK  
-----WGYRCTGMSYINF--PKILLITMNDGI---DPASGK-RF-----AK-GHG  
HFK--DMTSYEELKAAWDATLREITRMSVIVENAIDLGLEREVPD--ILCSALTDDCIGR  
GKTLKE---GGAVY-----DYISGL-QVGIANLSDSLAALKKLVFEEGRL-TPEELW--  
-----HALESDFE-----GER-----

-----GEEIRQM-----  
-----LIND--APKYGNDDYADSLVVEAYDTYIDEI-AKY--PNT--RYGRG  
PIGGIRYSGTSSISA-NVGQKGKGLATPDGRHAGTPLAE-GCSPEHSMDDKKGPTSVLKS-  
-VAKLPT-DEIVG-----GVLLNQKVNQPQLAKEED--KLKLMALLRTFFNR  
----LHGHIQYNVVSRETLIDAQNHPEKHRDLIVRVAGYSAFFNVLSKATQDDIIERTE  
HTL-----

>gi|225869364|ref|YP\_002745312.1| formate acetyltransferase [Streptococcus equi  
subsp. zooepidemicus]

-----MTEVKN  
PYFGTLTERMH-----

-----RYR-----EAV-LD-KKPY-IDAERAILA  
TEAYKKH-QNK-PSN-----LK-----RAYMLQNILENMTIYIEDE-SLIAGNQASS-NK  
DAPIFPEYT--LEFVLNELDL---FEKRDGD--V-----  
---FYITEETKQQLR--ELAPFW-----ENNNLRARCGVL---LPK-----  
-EVQVYM-----ETGFFGMEG--KMNSGD-----  
-----AHLAVNYQKLL--ELGLKGFEEERTRAACAALDL-----TIPESI---DKYHF  
YDSVLIVIAAVKAYAERYAKLARELAKTA--NPERQAELLEIACICDKVPYQPAETFAEA  
VQSVWFIQCILQIESNGHS--LSYGRFDQYMPYAKADLE-A--GRETEDS-----IVER  
LTNLWIKTLT-INKV-RSQAHTFSSAGSPLYQNVV---IGGQ-TR-DKQ--DAVNPLSYL  
VLRVAQT-KLPQPNLTVRYH-KGLDNRFMNECIEVMK-LGFGMPAMNN-DEIIIPSEFIK  
-----K-----G---VLEEDAYDYSAI-GCVE-----TAVPGK  
-----WGYRCTGMSYINF--PKILLITMNDGI---DPASGK-RF-----AI-GHG  
HFK--DMTSYDELKAAWDATLREITRMSVIVENAIDLGLEREVPD--ILCSALTDDCIGR  
GKTLKE---GGAVY-----DYISGL-QVGIANLSDSLAALKKLVFEEGRL-TTDELW--  
-----HALETDFE-----GER-----

-----GEEIRQM-----  
-----LIND--APKYGNDDYADSLVVEAYDTYIDEI-AKY--PNT--RYGRG  
PIGGIRYSGTSSISA-NVGQKGKGLATPDGRHAGTPLAE-GCSPEHSMDDKKGPTSVLKS-  
-VAKLPT-DEIVG-----GVLLNQKVNQPQLAKEED--KMKLMALLRTFFNR  
----LHGHIQYNVVSRETLIDAQKNPEKHRDLIVRVAGYSAFFNVLSKATQDDIIERTE  
HTL-----

>gi|71904392|ref|YP\_281195.1| formate acetyltransferase [Streptococcus pyogenes  
MGAS6180]

-----MIETKS

SupplementalMultipleSequenceAlign.txt

```
PYFGHLTDRMA-----  
-----  
-----HYR-----EAV-LD-KKPY-IDAERAILA  
TEAYQKH-QNK-PAN-----LK-----RAYMLQTILENMTIYIEDE-SLIAGNQASS-NK  
DAPIFPEYT--LEFVLNELDL---FEKRDGD--V-----  
---FYITEETKQQLR--DIAPFW-----ENNNLRARCGVL---LPE-----  
-EVQVYM-----ETGFFGMEG--KMNSGD-----  
-----AHLAVNYQKLL--EHGLKGFEERARAACAALDL-----TIPENI---DKYHF  
YDSVFIVIDAVKTYAKRYAKLARELAKTA--KPERQAELLDIARICDKVPYEPAKTFAEA  
VQSVWFIQCILQIESNGHS--LSYGRFDQYMPYVKADLE-A--GRETEDT-----IVER  
LTNLWIKTLT-INKV-RSQAHTFSSAGSPLYQNV---IGGQ-TR-DKK--DAVNPLSYL  
VLRVAQT-KLPQPNLTVRYH-KGLDNTFMNECIEVMK-LGFGMPAMNN-DEIIIPSEFIK  
-----K-----G---VSEEDAYDYSIAI-GCVE-----TAVPGK  
-----WGYRCTGMSYINF--PKILLITMNDGI---DPASGK-RF-----AK-GHG  
HFK--DMTSYEELKAAWDATLREITRMSVIVENAIDLGLEREVPD--ILCSALTDDCIGR  
GKTLKE----GGAVY-----DYISGL-QVGIANLSDSLAALKKLVFEEGRL-TPEELW--  
-----HALESDF-----G-----  
-----ERGEEIRQM-----  
-----LIND--APKYGNDDDYADSLVVEAYDTYIDEI-AKY--PNT--RYGRG  
PIGGIRYSGTSSISA-NVGQKGKTLATPDGRHAGTPLAE-GCSPEHSMDDKKGPTSVLKS-  
-VAKLPT-DEIVG-----GVLLNQKVNQPQLAKEED--KLKLMALLRTFFNR  
----LHGHIQYNVVSRETIDAQKHPEKHRDLIVRVAGYSAFFNVLSKATQDDIIERTE  
HTL-----
```

>gi|71911556|ref|YP\_283106.1| formate acetyltransferase [Streptococcus pyogenes MGAS5005]

```
-----  
-----  
-----  
-----  
-----  
-----
```

-----MT-----

```
-----  
-----HYR-----EAV-LD-KKPY-IDAERAILA  
TEAYQKH-QNK-PAN-----LK-----RAYMLQTILENMTIYIEDE-SLIAGNQASS-NK  
DAPIFPEYT--LEFVLNELDL---FEKRDGD--V-----  
---FYITEETKQQLR--DIAPFW-----ENNNLRARCGVL---LPE-----  
-EVQVYM-----ETGFFGMEG--KMNSGD-----  
-----AHLAVNYQKLL--EHGLKGFEERARAACAALDL-----TIPENI---DKYHF  
YDSVFIVIDAVKTYAKRYAKLARELAKTA--KPERQAELLDIARICDKVPYEPAKTFAEA  
VQSVWFIQCILQIESNGHS--LSYGRFDQYMPYVKADLE-A--GRETEDT-----IVER  
LTNLWIKTLT-INKV-RSQAHTFSSAGSPLYQNV---IGGQ-TR-DKK--DAVNPLSYL  
VLRVAQT-KLPQPNLTVRYH-KGLDNTFMNECIEVMK-LGFGMPAMNN-DEIIIPSEFIK  
-----K-----G---VSEEDAYDYSIAI-GCVE-----TAVPGK  
-----WGYRCTGMSYINF--PKILLITMNDGI---DPASGK-RF-----AK-GHG  
HFK--DMTSYEELKAAWDATLREITRMSVIVENAIDLGLEREVPD--ILCSALTDDCIGR  
GKTLKE----GGAVY-----DYISGL-QVGIANLSDSLAALKKLVFEEGRL-TPEELW--  
-----KALESDF-----GER-----  
-----GEDIRQM-----  
-----LIND--APKYGNDDDYADSLVVEAYDTYIDEI-AKY--PNT--RYGRG  
PIGGIRYSGTSSISA-NVGQKGKTLATPDGRHAGTPLAE-GCSPEHSMDDKKGPTSVLKS-  
-VAKLPT-DEIVG-----GVLLNQKVNQPQLAKEED--KLKLMALLRTFFNR  
----LHGHIQYNVVSRETIDAQKHPEKHRDLIVRVAGYSAFFNVLSKATQDDIIERTE  
HTL-----
```

>gi|157150032|ref|YP\_001451057.1| pyruvate formate-lyase [Streptococcus gordonii str. Challis substr. CH1]

```
-----  
-----  
-----  
-----  
-----  
-----MIQVKEVERTTIKT  
DYFGSLTERMN-----
```

SupplementalMultipleSequenceAlign.txt

-----K Y R-----E D V-L N-K K P Y-I D A E R A V L A  
T K A Y D E H-K E K-P N V-----L K-----R A Y M L Q E I L E N M T L Y I E D E-T M I V G N Q A S S-N K  
D A P I F P E Y T--L E F V L N E L D L---F E K R D G D--V-----  
---F Y I T E E T K E Q L R--S I A P F W-----E N N N L R A R A G A L---L P E-----  
-E V Q V Y M-----E T G F F G M E G--K M N S G D-----  
-----A H L A V N Y Q K L L--A Y G L K G F E E K A R A A K E A L D L-----T D P A S I---D K Y H F  
Y D S I F I V V N A V K A Y A E R F V A L A N Q L A E K A--D P K R R Q E L L E I A R I C S K V P Y E P A S T F A E A  
V Q S V W F I Q C I L Q I E S N G H S--L S Y G R F D Q Y M Y P Y V K A D L E-A--G R E T E A S-----I V E R  
L T N L W I K T I T-I N K V-R S Q A H T F S S A G S P L Y Q N V T---I G G Q-T R-D K R--D A V N P L S Y L  
V L K S V A Q T-H L P Q P N L T V R Y H-A G L D A R F M N E C I E V M K-L G F G M P A F N N-D E I I I P S F I A  
-----K-----G---V L E E D A Y D Y S A I-G C V E-----T A V P G K  
-----W G Y R C T G M S Y M N F--P K V L L I T M N D G I---D P A S G K-R F-----A P-S F G  
H F K--D M K S F A E L Q T A W D K T L R H L T R M S V I V E N S I D L S L E R E V P D--I L C S A L T D D C I G R  
G K H L K E---G G A V Y-----D Y I S G L-Q V G I A N L S D S L A A I K K L V F E E G R L-T P A E L W--  
-----H A L E T D Y A-----G E R-----  
-----G K E I Q E M-----  
-----L I H D--A P K Y G N D D D Y A D K L V T D A Y D I Y V D E I-A K Y--P N T--R Y G R G  
P I G G I R Y S G T S S I S A-N V G Q G R G T L A T P D G R N A G T P L A E-G C S P S H N M D K N G P T S V L K S-  
-V S K L P T-D E I V G-----G V L L N Q K V N P Q T L S K E E D--K L K L I A L L R T F F N R  
----L H G Y H I Q Y N V V S R E T L I D A Q K H P E K H R D L I V R V A G Y S A F F N V L S K A T Q D D I I G R T E  
H T L-----

>gi|94995233|ref|YP\_603331.1| Formate acetyltransferase [Streptococcus pyogenes  
MGAS10750]

-----M T E T K S  
P Y F G H L T D R M T-----

-----H Y R-----E A V-L D-K K P Y-I D A E R A I L A  
T E A Y Q K H-Q N K-P A N-----L K-----R A Y M L Q T I L E N M T I Y I E D E-S L I A G N Q A S S-N K  
D A P I F P E Y T--L E F V L N E L D L---F E K R D G D--V-----  
---F Y I T E E T K Q Q L R--D I A P F W-----E N N N L R A R C G V L---L P E-----  
-E V Q V Y M-----E T G F F G M E G--K M N S G D-----  
-----A H L A V N Y Q K L L--E H G L K G F E E R A R A A K A A L D L-----T I P E N I---D K Y H F  
Y D S V F I V I D A V K T Y A K R Y A K L A R E L A K T A--K P E R Q A E L L D I A R I C D K V P Y E P A K T F A E A  
V Q S V W F I Q C I L Q I E S N G H S--L S Y G R F D Q Y M Y P Y V K A D L E-A--G R E T E D S-----I V E R  
L T N L W I K T L T-I N K V-R S Q A H T F S S A G S P L Y Q N V T---I G G Q-T R-D K K--D A V N P L S Y L  
V L R S V A Q T-K L P Q P N L T V R Y H-K G L D N T F M N E C I E V M K-L G F G M P A M N N-D E I I I P S F I K  
-----K-----D---V S E E D A Y D Y S A I-G C V E-----T A V P G K  
-----W G Y R C T G M S Y I N F--P K I L L I T M N D G I---D P A S G K-R F-----A K-G Y G  
H F K--D M T S Y E E L K A A W D A T L R E I T R M S V I V E N A I D L G L E R E V P D--I L C S A L T D D C I G R  
G K T L K E---G G A V Y-----D Y I S G L-Q V G I A N L S D S L A A L K K L V F E E G R L-T P E E L W--  
-----Q S L E S D F A-----G E R-----  
-----G E E I R Q M-----  
-----L I N D--A P K Y G N D D D Y A D S L V V E A Y D T Y I D E I-A K Y--P N T--R Y G R G  
P I G G I R Y S G T S S I S A-N V G Q G K G T L A T P D G R H A G T P L A E-G C S P E H S M D K K G P T S V L K S-  
-V A K L P T-D E I V G-----G V L L N Q K V N P Q T L A K E E D--K L K L M A L L R T F F N R  
----L H G Y H I Q Y N V V S R E T L I D A Q K H P E K H R D L I V R V A G Y S A F F N V L S K A T Q D D I I E R T E  
H T L-----

>gi|222152354|ref|YP\_002561529.1| formate acetyltransferase [Streptococcus uberis  
0140J]

-----M T Q T K  
P Y F G Q L T D R M N-----

SupplementalMultipleSequenceAlign.txt

-----K Y R-----EAV-LT-KKPY-IDAERALLV  
TETYKKH-MDK-PAN-----LK----RAYMLQNILEHMTIYIEDD-SFIAGNQASS-NK  
DAPIFPEYT--LEFVINELDL---FEKRDGD--V-----  
---FYITEETKEQLR--SIAPFW-----ENNNLRARAGAL---LPK-----  
-EVDVYM-----ETGFFGMEG--KMNSGD-----  
-----AHLAVNYQKVL--EYGLKGFEEERARVAKDALDL-----TVPENI---DKYHF  
YDSIFIVIDAVKTYAHRYASLAREMAENA--SPERKAELLEIARICDKVPYQPAETFAEA  
VQSVWFIQCVLQIESNGHS--LSYGRFDQYMPYAKADIE-A--GRETEDS-----IVER  
LTNLWIKTLT-INKV-RSQHTFSSAGSPMYQNVT---IGGQ-TR-DKK--DAVNPMSYM  
VLKSVAQT-KLPQPNLTVRYH-KGLDNHFLNECIEVMK-LGFGMPAMNN-DEIIIPSF  
-----K-----G---VLEEDAYDYSAI-GCVE-----TAVPGK  
-----WGYRCTGMSYINF--PKILLITMNDGI---DPSSGK-RF-----AK-GHG  
HFT--EMTSYEELKAAWDETLREITRMSVIVENAIDLGLERECPD--ILCSALTDDCIGR  
GKTLKE---GGAVY-----DYISGL-QVGIANLSDSLAALKLVFEEKRL-TTSELW--  
-----WALET DFA-----GDR-----  
-----GEEIRQM-----  
-----LIND--APKYGNDDDYADQLVVDAYDTYIDEI- AKY--PNT--RYGRG  
PIGGVRYSGTSSISA-NVGQGGKGLATPDGRHAGTPLAE-GCSPEHSMDDKKGPTSVLKS-  
-VSKLRT-DEIVG-----GVLLNQKVN PQTLAKEED--KLKLMALLRTFFNR  
---LHGYHIQYNVVSRET LIDAQKHPEKHRDLIVRVAGYSAFFNVLSKATQDDIIERTE  
HTL-----

>gi|125717159|ref|YP\_001034292.1| formate acetyltransferase 3, putative  
[Streptococcus sanguinis SK36]

-----MIQVKEVEKTTIKT  
DYFGSLTERMD-----

-----K Y R-----EDV-LN-KKPY-IDAERAVLA  
TKAYDKH-KEK-PNV-----LK----RAYMLKEILENMTLYIEDE-TMIVGNQASS-NK  
DAPIFPEYT--LEFVLNEDL---FEKRDGD--V-----  
---FYITEETKEQLR--SIAPFW-----ENNNLRARAGAL---LPE-----  
-EVQVYM-----ETGFFGMEG--KMNSGD-----  
-----AHLAVNYQKLL--AYGLKGFEEKARAAKEALDL-----TDPASI---DKYHF  
YDSIFIVVDAVKAYAERFVALANQMAEKA--DPKRRQELLEIARICSKVPYEPASTFAEA  
VQSVWFIQCILQIESNGHS--LSYGRFDQYMPYVKADLE-A--GRETEAS-----IVER  
LTNLWIKTIT-INKV-RSQHTFSSAGSPLYQNV T---IGGQ-TR-DKR--DAVNPLSYL  
VLKSVAQT-HLPQPNLTVRYH-AGLDARFMNECIEVMK-LGFGMPAFNN-DEIIIPSFIA  
-----K-----G---VLEEDAYDYSAI-GCVE-----TAVPGK  
-----WGYRCTGMSYMN F--PKVLLITMNDGI---DPASGK-RF-----AP-SFG  
HFK--DMKSFAELQTAWDKTLRHLTRMSVIVENSIDL S LEREVPD--ILCSALTDDCIGR  
GKHLKE---GGAVY-----DYISGL-QVGIANLSDSLAAIKLVFEEGRL-TPAELW--  
-----HALET DYA-----G-----  
-----ERGKEIQEM-----

-----LIHD--APKYGNDDDYADKLVTDAYDIYVDEI- AKY--PNT--RYGRG  
PIGGIRYSGTSSISA-NVGQGRGT L ATPDGRNAGTPLAE-GCSPSHNMDKNGPTSVLKS-  
-VSKLPT-DEIVG-----GVLLNQKVN PQT LSKEED--KVKLIALLR TFFNR  
---LHGYHIQYNVVSRET LIDAQKHPEKHRDLIVRVAGYSAFFNVLSKATQDDIIIGRTE  
HTL-----

>gi|22536514|ref|NP\_687365.1| formate acetyltransferase [Streptococcus agalactiae  
2603V/R]

-----MTKQLLTQKYTNDVQQNSQ  
KHFGYLTERMY-----

-----S Y R-----DKV-LD-KKPF-IDAERAILV

SupplementalMultipleSequenceAlign.txt

```

TEAYQKH-QEK-PNV-----LK-----RAYMLQNILEKMTIYIDDE-TMIVGNQASS-DK
DAPIFPEYT--LEFVVNELDL---FEKRDGD--V-----
---FYITEETKEQIR--NIAPFW-----ENNLRARAGVM---LPE-----
-EVQVYM-----ETGFFGMEG--KMNSGD-----
-----AHLAVNYQKLL--EGLIGFEKKARKAKADLDL-----TKPESI---DKYHF
YDSILITIEAVKTYAERFAILAKKQAKTA--NAKRRQELLDIASICERVPPYPAETFAEA
VQSVWFIQCILQIESNGHS--LSYGRFDQYMPYVKSLE-A--GRETEDS-----IVER
LTNLWIKTIT-INKV-RSQAHTFSSAGSPLYQNV---IGGQ-TR-HKE--DAVNPLSFL
VLKSVAQT-HLPQPNLTVRYH-ANLDKSFMEAEVEMK-LGFGMPAFNN-DEIIIPSFIA
-----K-----G---VSEEDAYDYSAI-GCVE-----TAVPGK
-----WGYRCTGMSYINF--PKVLLITMNDGI---DPASGK-RF-----AP-SYG
HFT--QMTSYKELKEAWDKTLRYLTRMSVIVENAIDISLEREVPD--ILCSALTDDCIGR
GKHLKE---GGAVY-----DYISGL-QVGIANLSDSLAALKKLVFEEKRL-TTLEVW--
-----QALQSDYA-----GPR-----
-----GEEIRQM-----
-----LINE--APKYGNDDDYADSLVRECYDVYVEEI-AKY--PNT--RYGRG
PIGGIRYSGTSSISA-NVGQGRGTLATPDGRHAGTPLAE-GCSPSHNMDKKGPTSVLKS-
-VSKLPT-DEIVG-----GVLLNQKVNQPQLAKEED--KQKLIALLRTFFNR
----LHGYHIQYNVVSRETLIDAQKHPEKHRDLIVRVAGYSAFFNVLSKATQDDIIARTE
HAL-----

```

>gi|15900186|ref|NP\_344790.1| formate acetyltransferase, putative [Streptococcus pneumoniae TIGR4]

```

-----MVNTEVARTTIKT
EYFGSLTERMN-----
-----KYL-----EDV-LN-KKPY-IDAERAVLA
TRAYERY-KEQ-PNV-----LK-----RAYMLKEILENMTIYIEEE-SMIAGNQASS-NK
DAPIFPEYT--LEFVLNELDL---FEKRDGD--V-----
---FYITEETKEQLR--SIAPFW-----ENNLRARAGAL---LPE-----
-EVSVYM-----ETGFFGMEG--KMNSGD-----
-----AHLAVNYQKLL--QFGLRGFEERARKAKVALDL-----TDPASI---DKYHF
YDSIFIVIDAIAKVVYAKRFVALAKSLAENA--NPKRKKELLEIADICSRVPYEPATTFEA
IQSVWFIQCILQIESNGHS--LSYGRFDQYMPYMKADLE-S--GKETEDS-----IVER
LTNLWIKTIT-INKV-RSQSHTFSSAGSPLYQNV---IGGQ-TR-DKK--DAVNPLSYL
VLKSVAQT-HLPQPNLTVRYH-AGLDARFMNECIEVMK-LGFGMPAFNN-DEIIIPSFIA
-----K-----G---VLEDDAYDYSAI-GCVE-----TAVPGK
-----WGYRCTGMSYMN--PKVLLITMNDGI---DPASGK-RF-----AP-SFG
RFK--DMKNFSELENAWDKTLRYLTRMSVIVENSIDLSLEREVPD--ILCSALTDDCIGR
GKHLKE---GGAVY-----DYISGL-QVGIANLSDSLAAIKKLVFEEERI-SPSQLW--
-----HALETDYA-----GEE-----
-----GKVIQEM-----
-----LIHD--APKYGNDDDYADKLVTAAYDIYVDEI-AKY--PNT--RYGRG
PIGGIRYSGTSSISA-NVGQGRGTLATPDGRNAGTPLAE-GCSPSHNMDQHGPPTSVLKS-
-VSKLPT-DEIVG-----GVLLNQKVNQPQLAKEED--KLKLIALLRTFFNR
----LHGYHIQYNVVSRETLIDAQKHPEKHRDLIVRVAGYSAFFNVLSKATQDDIIIGRTE
HTL-----

```

>gi|225858103|ref|YP\_002739613.1| pyruvate formate-lyase [Streptococcus pneumoniae 70585]

```

-----MVNTEVARTTIKT
EYFGSLTERMN-----
-----KYL-----EDV-LN-KKPY-IDAERAVLA
TRAYERY-KEQ-PNV-----LK-----RAYMLKEILENMTIYIEEE-SMIAGNQASS-NK

```

SupplementalMultipleSequenceAlign.txt

DAPIFPEYT--LEFVLNELDL---FEKRDGD--V-----  
 ---FYITEETKEQLR--SIAPFW-----ENNNLRARAGAL---LPE-----  
 -EVSVYM-----ETGFFGMEG--KMNSGD-----  
 -----AHLAVNYQKLL--QFGLRGFEERARKAKVDLDL-----TDPASI---DKYHF  
 YDSIFIVIDAIVKAKRFFVALAKSLAENA--NPKRKKELLEIADICSRVPYEPATTFAEA  
 IQSVWFIQCILQIESNGHS--LSYGRFDQYMPYMKADLE-S--GKETEDS-----IVER  
 LTNLWIKTIT-INKV-RSQSHTFSSAGSPLYQNVV---IGGQ-TR-DKK--DAVNPLSYL  
 VLKSVAQT-HLPQPNLTVRYH-AGLDARFMNECIEVMK-LGFGMPAFNN-DEIIIPSFIA  
 -----K-----G---VLEDDAYDYSAI-GCVE-----TAVPGK  
 -----WGYRCTGMSYMN--PKVLLITMNDGI---DPASGK-RF-----AP-SFG  
 HFK--DMKNFSELENAWDKTLRYLTRMSVIVENSIDLSLEREVPD--ILCSALTDDCIGR  
 GKHLKE----GGAVY-----DYISGL-QVGIANLSDSLAAIKKLVFEEERI-SPSQLW--  
 -----HALETDYA-----GEE-----  
 -----GKVIQEM-----  
 -----LIHD--APKYGNDDDYADKLVTAAYDIYVDEI-AKY--PNT--RYGRG  
 PIGGIRYSGTSSISA-NVGQGRGTLATPDGRNAGTPLAE-GCSPSHNMDQHGPSTVLKS-  
 -VSKLPT-DEIVG-----GVLLNQKVNQTLAKEED--KLKLIALLRTFFNR  
 ----LHGYHIQYNVVSRETLLIDAQKHPEKHRDLIVRVAGYSAFFNVLSKATQDDIIGRTE

HTL-----  
 >gi|146318368|ref|YP\_001198080.1| pyruvate-formate lyase [Streptococcus suis  
 05ZYH33]

-----MKTVTEVAGTSIKT  
 EYFGSLTDRMN-----

-----KYR-----EDV-LD-KKPY-IDAERAVLA  
 TKAYQEH-REK-PNV-----LK---RAYMLKEILENMTLYIEEE-SLIAGNQASS-NK  
 DAPIFPEYT--LEFVLNELDL---FEKRDGD--V-----  
 ---FYITEETKEQLR--SIAPFW-----EKNLRSRAGVL---LPE-----  
 -EVQVYM-----ETGFFGMEG--KMNSGD-----  
 -----AHLAVNYQKVL--EQGLRGFEERVRVAKANLDL-----TDPASI---DKYHF  
 YDSIFIIIDAVKAYADRFFVALATELAEKA-PTAQRQELLEIARICAKVPYEPATTFAEA  
 VQSVWFIQCILQIESNGHS--LSYGRFDQYMPYVKADLE-A--GRETEDS-----IVER  
 LTNLWIKTIT-INKV-RSQSHTFSSAGSPLYQNVV---IGGQ-TR-DKK--DAVNPLSYL  
 VLKSVAQT-HLPQPNLTVRYH-AGLDARFMNECIEVMK-LGFGMPAFNN-DEIIIPSFIE  
 -----K-----G---VLEEDAYDYSAI-GCVE-----TAVPGK  
 -----WGYRCTGMSYMN--PKVLLITMNDGI---DPASGK-RF-----AP-AFG  
 HFK--DMKSFVLETAWEKTLRHLTRMSVIVENAIDIALEREVPD--ILCSALTDDCIGR  
 GKHLKE----GGAIY-----DYISGL-QVGIANLSDSLAAIKKLVFEEGRL-TPEELW--  
 -----HALETDYA-----GER-----  
 -----GKEIQEM-----  
 -----LIED--APKYGNDDDYADQLVTAAYDIYINEI-AKY--PNT--RFGRG  
 PIGGIRYSGTSSISA-NVGQGRGTLATPDGRNAGTPLAE-GCSPSHNMDKNGPSTVLKS-  
 -VAKLPT-HEIVG-----GVLLNQKVNQTLAKEED--KQKLIALLRTFFNR  
 ----LHGYHIQYNVVSRETLLIDAQLHPEKHRDLIVRVAGYSAFFNVLSRATQDDIIGRTE

HTL-----  
 >gi|116515577|ref|YP\_815753.1| pyruvate formate-lyase [Streptococcus pneumoniae D39]

-----MVNTEVARTTIKT  
 EYFGSLTERMN-----

-----KYR-----EDV-LN-KKPY-IDAERAVLA  
 TRAYERY-KEQ-PNV-----LK---RAYMLKEILENMSIYIEEE-SMIAGNQASS-NK  
 DAPIFPEYT--LEFVLNELDL---FEKRDGD--V-----  
 ---FYITEETKEQLR--SIAPFW-----ENNNLRARAGAL---LPE-----

SupplementalMultipleSequenceAlign.txt

```
-EVSVYM-----ETGFFGMEG--KMNSGD-----
-----AHLAVNYQKLL--QFGLRGFEERARKAKVALDL-----TDPASI---DKYHF
YDSIFIVIDAIAIKVYAKRFVALAKSLAENA--NPKRKKELLEIADICSRVPYEPATTFAEA
IQSVWFIQCILQIESNGHS--LSYGRFDQYMPYMKADLE-S--GKETEDS-----IVER
LTNLWIKTIT-INKV-RSQSHTFSSAGSPLYQNVT---IGGQ-TR-DKK--DAVNPLSYL
VLKSVAQT-HLPQPNLTVRYH-AGLDARFMNECIEVMK-LGFGMPAFNN-DEIIIPSFIA
-----K-----G---VLEDDAYDYSAI-GCVE-----TAVPGK
-----WGYRCTGMSYMN--PKVLLITMNDGI---DPASGK-RF-----AP-SFG
HFK--DMKNFSELENAWDKTLRYLTRMSVIVENSIDLSLEREVPD--ILCSALTDDCIGR
GKHLKE----GGAVY-----DYISGL-QVGIANLSDSLAAIKKLVFEEERI-SPSQLW--
-----HALETDYA-----GEE-----
-----GKVIQEM-----
-----LIHD--APKYGNDDDYADKLVTAAYDIYVDEI-ACY--PNT--RYGRG
PIGGIRYSGTSSISA-NVGQGRGTLATPDGRNAGTPLAE-GCSPSHNMDQHGPSTVLKS-
-VSKLPT-DEIVG-----GVLLNQKVNQPQLAKEED--KLKLIALLRTFFNR
----LHGHIQYNVVSRETIDAQKHPEKHRDLIVRVAGYSAFFNVLSKATQDDIIGRTE
HTL-----
```

>gi|15902276|ref|NP\_357826.1| formate acetyltransferase 3 [Streptococcus pneumoniae R6]

```
-----MLTMVNTEVARTTIKT
EYFGSLTERMN-----
```

```
-----KYR-----EDV-LN-KKPY-IDAERAVLA
TRAYERY-KEQ-PNV-----LK---RAYMLKEILENMSIYIEEE-SMIAGNQASS-NK
DAPIFPEYT--LEFVLNELDL---FEKRDGD--V-----
---FYITEETKEQLR--SIAPFW-----ENNNLRARAGAL---LPE-----
-EVSVYM-----ETGFFGMEG--KMNSGD-----
-----AHLAVNYQKLL--QFGLRGFEERARKAKVALDL-----TDPASI---DKYHF
YDSIFIVIDAIAIKVYAKRFVALAKSLAENA--NPKRKKELLEIADICSRVPYEPATTFAEA
IQSVWFIQCILQIESNGHS--LSYGRFDQYMPYMKADLE-S--GKETEDS-----IVER
LTNLWIKTIT-INKV-RSQSHTFSSAGSPLYQNVT---IGGQ-TR-DKK--DAVNPLSYL
VLKSVAQT-HLPQPNLTVRYH-AGLDARFMNECIEVMK-LGFGMPAFNN-DEIIIPSFIA
-----K-----G---VLEDDAYDYSAI-GCVE-----TAVPGK
-----WGYRCTGMSYMN--PKVLLITMNDGI---DPASGK-RF-----AP-SFG
HFK--DMKNFSELENAWDKTLRYLTRMSVIVENSIDLSLEREVPD--ILCSALTDDCIGR
GKHLKE----GGAVY-----DYISGL-QVGIANLSDSLAAIKKLVFEEERI-SPSQLW--
-----HALETDYA-----GEE-----
-----GKVIQEM-----
-----LIHD--APKYGNDDDYADKLVTAAYDIYVDEI-ACY--PNT--RYGRG
PIGGIRYSGTSSISA-NVGQGRGTLATPDGRNAGTPLAE-GCSPSHNMDQHGPSTVLKS-
-VSKLPT-DEIVG-----GVLLNQKVNQPQLAKEED--KLKLIALLRTFFNR
----LHGHIQYNVVSRETIDAQKHPEKHRDLIVRVAGYSAFFNVLSKATQDDIIGRTE
HTL-----
```

>gi|194398478|ref|YP\_002036953.1| pyruvate formate-lyase [Streptococcus pneumoniae G54]

```
-----MVNTEVARTTIKT
EYFGSLTERMN-----
```

```
-----KYR-----EDV-LN-KKPY-IDAERAVLA
TRAYERY-KEQ-PNV-----LK---RAYMLKEILENMTIYIEEE-SMIAGNQASS-NK
DAPIFPEYT--LEFVLNELDL---FEKRDGD--V-----
---FYITEETKEQLR--SIAPFW-----ENNNLRARAGAL---LPE-----
-EVSVYM-----ETGFFGMEG--KMNSGD-----
```



SupplementalMultipleSequenceAlign.txt

-----AHLAVNYQKLL--QFGLRGFEERARKAKVALDL-----TDPASI---DKYHF  
YDSIFIVIDAIVKQYAKRFVALAKSLAENA--NPKRKKELLEIADICSRVPYEPATTFAEA  
IQSVWFIQCILQIESNGHS--LSYGRFDQYMPYMKADLE-S--GKETEDS-----IVER  
LTNLWIKTIT-INKV-RSQSHTFSSAGSPYQNVV---IGGQ-TR-DKK--DAVNPLSYL  
VLKSVAQT-HLPQPNLTVRYH-AGLDARFMNECIEVMK-LGFGMPAFNN-DEIIIPSFIA  
-----K-----G---VLEDDAYDYSAI-GCVE-----TAVPGK  
-----WGYRCTGMSYMN--PKVLLITMNDGI---DPASGK-RF-----AP-SFG  
HFK--DMKNFSELENAWDKTLRYLTRMSVIVENSIDLSLEREVPD--ILCSALTDDCIGR  
GKHLKE----GGAVY-----DYISGL-QVGIANLSDSLAAIKKLVFEEERI-SPSQLW--  
-----HALETDYA-----GEE-----  
-----GKVIQEM-----  
-----LIHD--APKYGNDDDYADKLVTAAYDIYVDEI-APY--PNT--RYGRG  
PIGGIRYSGTSXISA-NVGQGRGTATPDGRNAGTPLAE-GCSPSHNMDQHGPSTVLKS-  
-VSKLPT-DEIVG-----GVLNMQKVNPTLAKEED--KLKLIALLRFFNR  
----LHGYHIQYNVVSRETLLIDAQKHPEKHRDLIVRVAGYSAFFNVLSKATQDDIIIGRTE  
HTL-----

>gi|24378977|ref|NP\_720932.1| formate acetyltransferase (pyruvate formate-lyase 2)  
[Streptococcus mutans UA159]

-----  
-----  
-----  
-----  
-----MVIPLLTQKYTNDVQKNSQ  
KHFGYLTERMY-----

-----SYR-----DKV-LD-KKPY-IDAERAILA  
TEAYKEH-QEK-PNV-----LK---RAYMLKNILEKMSLYIDDE-TMIVGNQASS-DK  
DAPIFPEYT--LEFVLNLDL---FEKRDGD--V-----  
---FYITEETKKQIR--DIAPFW-----ENNNLRARAGAM---LPD-----  
-EVQVYM-----ETGFFGMEG--KMNSGD-----  
-----AHLAVNYQKLL--ELGLVGFEERTREKADLDL-----TDPASI---DKYHF  
YDSILVTIDAVKTYAQRVFTLAKEMAETA--AAKRRRELLEIAAICERVPPYPARTFAEA  
VQSVWFIQCILQIESNGHS--LSYGRFDQYMPYMKADLE-A--GRETEDS-----IVER  
LTNLWIKTIT-INKV-RSQSHTFSSAGSPYQNVV---VGGQ-TR-AKK--DAVNPLSFL  
VLKSVAQT-HLPQPNLTVRYH-AGLNPDFMNEAIEVMK-LGFGMPAFNN-DEIIIPSFIA  
-----K-----G---VAEEDAYDYSAI-GCVE-----TAVPGK  
-----WGYRCTGMSYMN--PKILLITMNGI---DPASGK-RF-----AP-EFG  
HFV--DMTSYEDLKSADKTIYLRMSVIVENAIDLTLEREVPD--ILCSALTDDCIGR  
GKHLKE----GGAVY-----DYISGL-QVGIANLSDSLAAVKKLVFEEKRL-TTAEW--  
-----EALQSDYA-----GEH-----  
-----GGEIRQM-----  
-----LIND--APKYGNDDDYADQLVDCYDVYVDEI-APY--PNT--RYGRG  
PIGGIRYSGTSSISA-NVGQGRGTATPDGRHAGAPLAE-GCSPSHNMDKNGPSTVLKS-  
-VSKLPT-AEIVG-----GVLNMQKVNPTLSKEED--KQKLIALLRAFFNR  
----LHGYHIQYNVVSRETLLIDAQKHPEKHRDLIVRVAGYSAFFNVLSKATQDDIIARTE  
HAL-----

>gi|187932732|ref|YP\_001885707.1| pyruvate formate-lyase [Clostridium botulinum B  
str. Eklund 17B]

-----  
-----  
-----  
-----  
-----M  
MDYIIKSERIK-----  
-----  
-----  
-----  
-----KLR-----ECI-LN-KTPS-VCIERARYF  
TKAYKEN-EDK-PIY-----IK---RAKAVEKTLENMSIYIKDG-ELIVGNQSFN-ER  
TAPIFPEYA--VQWIEDELKEYGNFNKREGD--N-----  
---FYINEKNIDELL--EIVQYW-----KGKTLKDKCYGI--MPE-----  
-EIKKAI-----NVKVIHGEH--NMTSGD-----  
-----GHIVPDFEKAL--NLGLSGIIEKAAEAELEKVDI-----SENDGF---KKKSF

SupplementalMultipleSequenceAlign.txt

LESVIIINKAIINFLRYSELAKKLALAE-KDINRKNELLLISDICLRIPKEAPKNFYEA  
VQMIWVHLVIQIESNGHS--ASLGRVDQYLYPYKKEGIE-N--GTLTEDF-----AKEL  
LQCLWIKLFS-ILKI-RPTSHAGYGAGYPTYQNVV---IGGC-NE-LGE--DCTNSLSYL  
ILQSVGEM-KLTQPNLSARLF-SNSSARFIRECANVIK-TGFGMPALHT-DEIIVQSLLN  
-----K-----G---VNYKDAYNYTMV-GCVE-----VAVPGK  
-----WGYRCTGMSFLNM--IKAVELTLNDGY---DERTGE-TL-----LTG  
NRDLLSFNNFEELWAAWEKNIAAYTKLTVALDKIADTNLEEF-PD--IFCSSLVDDCIGR  
GKSIKE---GGSIY-----DIVAGL-QVGLANATNSLFALKDVIKFDKNIL-SKEEVV--  
-----NALKNNFE-----G-L-----  
-----EGIKVKK-----  
-----ILFS--SPKYGNDIDCVDNMARNVYQTYINEI-SKY--KTT--RYGRG  
PIGGIYGLSTSGISS-NVPMGCVTGTATPDGRFAWTPAAE-GASPVQGSIDIEGPTSVLKS-  
-ITKLPT-ILMTG-----GQLLNMKFSPLLVGDDQ--FTKFINLIKSFVS-  
---MKGWHIQFNVIDTKTLREAQKDPEKYRDVIVRVAGYCAQFVTLTQTTQEDIISRTE  
EAF-----

>gi|118443080|ref|YP\_877303.1| pyruvate formate-lyase [Clostridium novyi NT]

-----  
-----  
-----  
-----  
-----MS  
RGFSAPTERVK-----  
-----KLR-----AQI-LD-VVPC-VETERALLI  
TESYKET-EEK-PMI-----LR---RALALKKILNLPVIREG-ELIVGSLTKR-PR  
SSQVFPEFS--NKWLQDELDR---LDKRKGD--V-----  
---FEIAEEDKKKLK--EVFEYW---DGKTTHELATSY---MSK-----  
-ETIDAM-----NSDIFTVGN--YYFNGV-----  
-----GHISVNYGKVL--AVGFNGIIEEAKKSLESSDK-----TSPSYI---KKEQF  
LNSVIIISCEAAIDYAKRYSDEAKKLADKT-SDPIRKSELNEIARICSKVPKEGASSFYEA  
CQAFWFVHAIINVESNGHS--ISPTRFDQYMYPYKMDMD-E--GKITQDF-----AQEL  
VDCIWIKLND-INKV-RDEISTKYFGGYPMYQNLV---VGGQ-NF-EGK--DVTNELSYM  
ALEASAHV-RLPQPSLSVRIW-NKTPDEFLLRACELTR-EGLGLPAYN-DEVIIPALVA  
-----R-----G---VTLEDARSYGI-GCVE-----PQCPGK  
-TEG-W---HDSAFFNL--ARIVELAIHSGK---DKGV---QI-----GP-KTK  
EFT--EMKSFDEFMEAYKAQMEYFVKHMCVADNCIDIAHAERAPL--PFLSSMVENCISV  
GKSLQE---GGAHY-----NFSGPQ-GVGVANVGDSLMAIKKLVFEDEKI-TKEQLK--  
-----EALDSNFE-----K-Y-----  
-----PEVKQI-----  
-----LSKQ--APKYGNDIDEVDELARVGLVYSKEV-NKY--TNP--R----  
--GGQFQPLYPSSI-NVYFGSLTGTATPDGRSAEEPLAD-GVSPSRGKDVSGPTAAGNS-  
-VAKLDH-FIASN-----GTLFNQKFHPPAALKGDKG--LQNLAAVVRSYFD-  
---QKGMHVQYNVIDRDTLIKAQKPEDYRDLIVRVAGYSAQFISLTKTIQDDIIKRT  
HVM-----

>gi|77918998|ref|YP\_356813.1| glycerol dehydratase [Pelobacter carbinolicus DSM 2380]

-----  
-----  
-----  
-----MSIQVKVNP  
VASQGPTERVE-----  
-----KIK-----ARF-LA-TTPE-ICAERAKLI  
TESYKET-EGQ-PMS-----IR---RAKALEKILLEMSVYIDDD-ELIVGNQCSM-PR  
SAPIYPEFS--CEWVEDELDR---LAKRSAD--V-----  
---FLISEDVKKTLR-EDVFPYW---KGKTNHEIATAL---MKQ-----  
-EAIDAG-----NAVVTYVGN--YYFNGV-----  
-----GHISANYGKVM--NQGLNSVIAKAAEAKEKDFD-----ADAHQM---KSLHF  
LESTIIANKAVIAFANRFADEAEESLAAA--KNAARKAELLEIARICRKVPAEPAETFQEA  
VQAFWFIHLVIQIESNGHS--ISPMRFDQYCYPFYAAS---K--NSLSDEK-----AQEM

SupplementalMultipleSequenceAlign.txt

LDLLWLKFNG-LNKV-RDENSTMAFAGYPMFMNII---VGGV-DR-EGK--DATNELSLM  
LLQCAANT-KLYAPSLSIRVH-EGTPDVLVYMKAAEVSR-MGLGVPAYFN-DRTIIPALLS  
-----R-----G---LTLEDARDYGII-GCVE-----PQVGGK  
-TEG-W---HDAAFFNM--AKVVELTLNNGY---DKRTEM-QV-----GP-KTG  
DVT--EMKSFDDVMAAYAKQMEYFVGLMCHADNMVDLAHGQNVPL--PFLSSLVEDCIGR  
GKSLQE----GGAIY-----NFSGPQ-GVGVANAGDSLTAIKKLCFDDKVI-SLPELK--  
-----EVLDKDFA-----G-A-----  
-----EIRQM-----  
-----VINR--APKYGNDDDYADEIAVESANIYCAEV-NKY--RNP--R----  
--GGQFQPLYPASA-NVPFGGVVEATPDGRKKGTPAD-GVSPIGGADISGPTATVNS-  
-VAKLDH-EVTSN-----GTLNMQKFHPNAVKGEEG--LRNLIAVTETYFK-  
----NGGFHVQYNVIDRNTLLDAQKPEDFKGLVVRVAGYSAFFTALDKSLQDDIISRTE  
QVF-----

>gi|94989383|ref|YP\_597484.1| formate acetyltransferase [Streptococcus pyogenes  
MGAS9429]

-----MTETKS  
PYFGHLTDRMT-----

-----HYR-----EAV-LD-KKPY-IDAERAILA  
TEAYQKH-QNK-PAN-----LK---RAYMLQTIENMTIYIEDE-SLIAGNQASS-NK  
DAPIFPEYT--LEFVLNELDL--FEKRDGD--V-----  
---FYITEETKQQLR--DIAPFW-----ENNNLRARCGVL---LPE-----  
-EVQVYM-----ETGFFGMEG--KMNSGD-----  
-----AHLAVNYQKLL--EHGLKGFEERARAACAALDL-----TIPENI---DKYHF  
YDSVFIVIDAVKTYAKRYAKLARELAKTA--KPERQAELLDIARICDKVPYEPAKTFAEA  
VQSVWFIQCILQIESNGHS--LSYGRFDQYMPYVKADLE-A--GRETEAS-----IVER  
LTNLWIKTLT-INKV-RSQAHTFSSAGSPLYQNVV--IGGQ-TR-DKK--DAVNPLSYL  
VLRVAQT-KLPQPNLTVRYH-KGLDNTFMNECIEVMK-LGFGMPAMNN-DEIIPSEFIK  
-----K-----G---VSEEDAYDYSAI-GCVE-----TAVPGK  
-----WGYRCTGMSYINF--PKILLITMNDGI--DPASGK-RF-----AK-GHG  
HFK--DMTSYEELKAAWDATLREITRMSVIVENAIDLGLEREVPD--ILCSALTDDCIGR  
GKTLKE----GGAVY-----DYISGL-QVGIANLSDSLAALKKLVFEEGQL-TPEELW--

-----QAP-----

>gi|118444929|ref|YP\_878877.1| pyruvate formate-lyase [Clostridium novyi NT]

-----MDVLA  
RGFSIPTKRVE-----

-----KLK-----EQI-LS-ATPC-IEVERARLL  
TESFKET-ENQ-PII-----IR---KAKALEKILNEMPVIREG-ELIVGSLTKN-SR  
SAQVFPEFS--NKWLVEEFEK---LPKRTSD--S-----  
---FQISEEVKSELI--DIFKYW-----EGKTVSELATSY---MPK-----  
-ETLEAM-----GAKVFTVAN--YYFNGL-----  
-----GHISVDYKVKVL--ELGFKGIIIEIKAKMDSADK-----SDPEYI---KKRTF  
WEAVIISCEAAIDYARRYAKLAKELSENT-EDCKRKEELLKIAEICKVPENPATTFYEA  
CQSFVFWQAIISLESNGHA--ISPARFDQYMPYFKSDVD-N--NVVTKEE-----NREI  
LQCLWVKFND-LTKV-RDETTTKAFSGYSMFQNLII---VGGQ-TE-EGK--DATNELSYM  
CLDATGSL-KLPQPSLSVRIW-SKTPEEFLIRTCELTR-LGTGLPAFYN-DEVIIPMLVN

SupplementalMultipleSequenceAlign.txt

-----N-----G---MTLEDARDYAIV-GCVE-----PQKPGK  
-TDG-W---YDAAFFNL--AQILKLTIDNGK-----MDGK-QV-----GP-KTG  
EFE--EFKDIDEVIEAYKKQMEYFVAQMVSADNCVDIAHRERAPL--PFLSAMLDDCIAK  
GKSIQE---GGGHY-----RFSGPL-GVGIANVGDSFMAIKKLVFDDEKI-TLDKLK--  
-----QALDGNFG-----KDEKDEGKK-----  
-----NELQGIKQM-----  
-----LLHR--APKFGNDIDEVDEFTREGALIYCNEV-LKH--FNQ--R----  
--GGKFLPGLYPVSN-NVHLGSLVGATPDGREAYQPIAD-GVSPTRGADVNGPTAAANS-  
-VAKLEH-YAAPS-----GTLFNQKFNPSLLKGDNG--LRNLGTLIRSYFD-  
----HKGMHIQFNVDKNVLLDAQKHPEKYRDLIVRVAGYSAQFICLNKEIQDDIIK RTE  
QEL-----

>gi|188588000|ref|YP\_001921047.1| pyruvate formate-lyase [Clostridium botulinum E3 str. Alaska E43]

-----MDILA  
KGFIRPTKRVE-----

-----KLK-----EEI-FS-ATPY-IEADRAIIL  
TESFKET-ENE-PII-----IR---KAKSLEKILNEIPIVIRDN-ELIVGSLTKN-PR  
SCQVFPEFS--NQWLVDDEFD---FEKRTSD--L-----  
---FKIPEETKSKLK--EVFKYW---QGKTVSELATSY---MTN-----  
-ETKDAM-----NTKVFTVAN--YHFNGL-----  
-----GHISVDYPKVL--EKGFLGIKETENAIINADK-----SNPEYV---KKKVF  
WDSIIISCKAAIKYANRYSELAKKLAGET-LDINRKNELLKIAEICSKVPANPAETFYEA  
CQSFWFVQAIISLESNGHA--ISPARFDQYMPYKNDID-N--KFATKEV-----NTEI  
LHCLWVKFND-LTKV-RDETTTKAFSGYSMFQNL---VGGQ-TP-DGK--DATNELSYM  
CLEATGSL-KLPQPSLCVRIW-SKTPDEFLIRTCELTR-LGTGLPAFYN-DEVVIPTLIN  
-----Q-----G---LTIEDARDYAIV-GCVE-----PQKPGK  
-TDG-W---YDAAFFNL--AKILELSMNNGR-----LNGK-QV-----GP-ETG  
EFT--SFKNIDDFINAYKKQIEYFVFMVAADNCVDIAHAKRAPL--PFLSSMLDDCIGT  
GKSIQE---GGGHY-----RFSGPL-GVGIANVGDSFMAIKKLIFDENKI-TLLKLK--  
-----AAVDSNFG-----ENEDDPIKKAEY-----  
-----EDIKQL-----

-----ILNR--VPKFGNDIDEVDEFTRDGALIYCKEV-LKY--TNQ--R----  
--GGKFIPGLYPVSN-NVYLGSLVGATPDGRNAFKPLAD-GVSPTRGADVNGPTAAANS-  
-VSKLEH-FAAPS-----GTLFNQKFNPNLQGDNG--LKNLGLSIRSYFD-  
----RKGGMHIQFNVIDKKVLLLEAQKHPEQYRDLIVRVAGYSAQFICLDKGVQDDIIK RTE  
QNL-----

>gi|187932402|ref|YP\_001886034.1| pyruvate formate-lyase [Clostridium botulinum B str. Eklund 17B]

-----MDILA  
KGFINPTKRVE-----

-----KLK-----EEI-FS-AIPC-IEADRAIIL  
TESFKET-ENE-PII-----IR---KAKSLEKILSEIPVIRDN-ELIVGSLTKN-PR  
SCQVFPEFS--NQWLVDDEFD---FEKRTSD--L-----  
---FKIPEETKSKLK--EVFKYW---QGKTVSELATSY---MSN-----  
-ETKDAM-----NTKVFTVAN--YHFNGL-----  
-----GHISVDYPKVL--EKGFLGIKETENAIINADK-----SNPEYV---KKKVF  
WDSIIISCKAAIKYANRYSELAKKLAGET-LDINRKNELLKIAEICSKVPANPAETFYEA  
CQSFWFVQAIISLESNGHA--ISPARFDQYMPYKNDID-N--KFATKEV-----NTEI  
LHCLWVKFND-LTKV-RDETTTKAFSGYSMFQNL---VGGQ-TP-DGK--DATNELSYM  
CLEATGSL-KLPQPSLCVRIW-SKTPDEFLIRTCELTR-LGTGLPAFYN-DEVVIPTLIN  
-----Q-----G---LTIEDARDYAIV-GCVE-----PQKPGK

SupplementalMultipleSequenceAlign.txt

-TDG-W----YDAAFFNL--AKILELSMNGR-----LNGR-QV-----GP-ETG  
EFT--SFKNIDDFINAYKKQIEYFVFMVAADNCVDIAHAERAPL--PFLSSMLDDCIGT  
GKSIQE----GGGHY-----RFSGPL-GVGIANVGDSFMAIKKLIFDENKI-TLLKLK--  
-----SAVDSNFG-----ENEDDPIKKAEY-----  
-----EDIKQL-----  
-----ILNR--VPKFGNDIDEVDEFTRDGALICYKEV-LKY--TNQ--R----  
--GGKFIPGLYPVSN-NVYLGSLVGATPDGRSAFKPLAD-GVSPTRGADVNGPTAAANS-  
-VSKLEH-FAAPS-----GTLFNQKFNPNLSLQGDNG--LKNLGLSIRSYFD-  
----RKGMHQFNVIDKVKVLEAQQHPEQYRDLIVRVAGYSAQFICLDKGVQDDIIKRT  
QNL-----

>gi|28210647|ref|NP\_781591.1| formate acetyltransferase 2 [Clostridium tetani E88]

-----MSFLE  
KGFSESTRVK-----

-----RLK-----EQI-FS-AVPC-VEADRILL  
TESFKET-EDQ-PII-----IR---KAKALEKILNEIPIVIRDG-ELIVGSLTKN-PR  
SAQVFPEFS--NKWLVEEFDK---LNKRTSD--A-----  
---FEISDEAKSQLI--EVFKYW----EGKTVSELATSY---MTD-----  
-DTIDAM-----NAKVFTVAN--YHFNGL-----  
-----GHISVDYEVKL--KKGFSGIIKEVNETINNADK-----NNPEYI---KQRRF  
WDIIISCEAAISYAKRYSQAKELAQKE-TNATRDELNISKICEKVPEKPATTFQEA  
CQSFVQAIISLESNGHA--ISPARFDQYMYPYFKHDID-L--HPKNRES-----AREI  
LHCLWVKFND-LTKV-RDETTTKAFSGYSMFQNLI---VGGQ-TP-EGK--DATNELSYM  
CMDATGTL-MLPQPSLSVRIW-SKAPEEFLIRSCELTR-LGTGLPAFYN-DEVIIPMLVN  
-----H-----G---LTLEDARDYAIV-GCVE-----PQKPGK  
-TDG-W----YDAAFFNM--AKVLEMTINNGK-----VDGK-QI-----GP-KTG  
EFT--SFSNIDEFIEAYKKQTEYFVSYMVSADNCVDIAHAERAPL--PFLSCMLDDCISK  
GKSIQE----GGGHY-----RFSGPL-GVGIANIGDSFMAIKKLVFDEKKL-TLNEIK--  
-----EAIDTNYG-----

-----EFEENPEKKIKYKDIQQM-----  
-----LLNR--APKFGNDIDEVDEYTRLGALICYKEV-EKH--TNQ--R----  
--GGQFIPGLYPVSN-NVHLGTLVSATPDGRGAKKPLAD-GVSPTRGVDVNGPTAAANS-  
-VAKLEH-FCAPS-----GTLFNQKFSPLSLQGDNG--LKNLASLIRSYFD-  
----QKGMHMVQFNVVDKNVLIDAQKRPEQYRDLIVRVAGYSAQFICLDNAIQDDIIKRT  
QSF-----

>gi|219667304|ref|YP\_002457739.1| pyruvate formate-lyase [Desulfitobacterium hafniense DCB-2]

-----MYNVVFMKDKG  
KKQEVSERIR-----

-----ALR-----EEI-VA-TVPE-IFMDRALLV  
TESYEET-FGS-SYI-----YR---RAKALEKVLNMDICINDK-ELIVGSYAGK-PR  
GCQVFPEYD--MKFLVDEMDE---FALRQAD--K-----  
---FTISEDNKAIAR--QIYEKW---KGNTITDQALNL---FPE-----  
-EAAKAS-----QQLIFLLTC---LGSGL-----  
-----GHMLVNYEKVI--QKGLAGFMLEIEEENGLDI-----CDPEYN---DKKTY  
YQSLTIVCQAVCKFAGRFSLLALAQAekt-ADPQRKEELLQIAENCRRVPAQPAQNFQQA  
LQALWVQVLVHLESNGHS--VSPGRFDQYMYPYAAETD-----KDA-----CEEL  
LHCLWLKFFE-LNKI-RNKVSSVVFQYPMFQNLIV---VGGQ-NA-NGE--SAVNLSHL  
CLEATAKV-HLPQPSLSVRWF-YGCPPEEFIRHALEVVS-YGTGMPALFN-DEVIIPNMLQ  
-----L-----G---YTIIEEARDYAIIGCTE-----MNVPHK  
TEPF-----LTGGFLNI--LKILELTIFDGF---DPVSQT-QQ-----AF-QSG  
CVE--SFTTFEEFQKAYYEQLSYLQRHVTCNILDALHGKICPT--PFESMLLSDCLEN

SupplementalMultipleSequenceAlign.txt

GKSNLE----GGARY-----NTTTLQ-LVGMANVADSLATIKKLIYVEKSL-TWNQLK--  
-----AALQNNYE-----  
-----DDELLRQR-----  
-----IINH--VPKYGNDHDFVDRLGRDVVYHCCREA-AKY--RSP--R----  
--NGTYNIAVYTLAT-NVLWASKVGATPDGRKMGSVLADGGVSCSHGMDKNGLTALFNS-  
-VRKIDP-YKPLG-----SALLNIRLSPSSFNETD---FQKTVDVVKSFMM-  
----NKGQHVQFNVFDVNALRDAQNKPEKYPLL MVRVAGFSVLFTTIETILQEDIINRTL  
HSSH-----

>gi|82778873|ref|YP\_405222.1| putative formate acetyltransferase 2 [Shigella  
dysenteriae Sd197]

-----MTNRIS-----  
-----RLK-----TAL---FANTREISLERARLY  
TASHRQT-EGE-PVI-----LR---RAKATAYILEHVEISIRDE-ELIAGNRTVK-LR  
AGIMSPEND--PYWLLKELDQ--FPTRPQD--R-----  
---FAISEEDKRIYR-EELFPYW-----EKRSMDKDFINGQ---MTD-----  
-EVKAAT-----STQIFSINQ---TDKGQ-----  
-----GHIIIDYPRLL--NHGLGELVAQMQQHCQQQ-----PENHF  
YQAALLLLEASQKHILRYAELAETMAASC-TDAQRREELLTIAEISRHNAEHKPQTFWQA  
CQLFWYMNIIILQYESNASS--LSLGRFDQYMLPFYQASLT----QGEDPAF-----LKEL  
LESLWVKCND-IVLL-RSTSSARYFAGFPTGYTAL---LGGL-TE-NGR--SAVNVLSFL  
CLDAYQSV-QLPQPNLGVRTN-ALIDTPFLMKAETIR-LGTGIPQIFN-DEVVVPAFLN  
-----R-----G---VSLEDARDYSVV-GCVE-----LSIPGR  
-TYGL-----HDIAMFNL--LKVMEICLHENE-----GN-----  
-----AALTYEGLLEQIRAKISHYITLMVEGSNICDIGHRDWAPV--PLSSSFISDCLEK  
GRDITD---GGARY-----NFSGVQ-GIGIANLSDSLHALKGMVFDQQL--SFDELL--  
-----SVLKANFA-----TLEG-----  
-----EKVRAR-----  
-----LINR--FEKYGNDIDEVDNISAEELLRHYCKEV-EKY--QNP--R----  
--GGYFTPGSYTVSA-HVPLGSVVGATPDGRFAGEQLADGGLSPMLGQDTQGPTAVLKS-  
-VSKLDN-TLLSN-----GTLLNVKFTPATLEGEAG--LRKLADFLRAFTQ-  
----LKLQHIQFNVNADTLREAQQRPDYAGLVVRVAGYSAFFVELSKEIQDDIIRRTA  
HQL-----

>gi|91213499|ref|YP\_543485.1| putative formate acetyltransferase 2 [Escherichia coli  
UTI89]

-----MTNRIS-----  
-----RLK-----TAL---FANTREISLERALLY  
TASHRQT-EGE-PVI-----MR---RAKATAYILEHVEISIRDE-ELIAGNRTVK-PR  
AGIMSPEND--PYWLLKELDQ--FPTRPQD--R-----  
---FAISEEDKRIYR-EELFPYW-----EKRSMDKDFINGQ---MTD-----  
-EVKAAT-----STQIFSINQ---TDKGQ-----  
-----GHIIIDYPRLL--NHGLGELVAQMQQHCQQQ-----PENHF  
YQAALLLLEASQKHILRYAELAETMAASC-TDQRREELLTIAEISRHNAEHKPQTFWQA  
CQLFWYMNIIILQYESNASS--LSLGRFDQYMLPFYQTSLT----QGEDPAF-----LKEL  
LESLWVKCND-IVLL-RSTSSARYFAGFPTGYTAL---LGGL-TE-NGR--SAVNVLSFL  
CLDAYQSV-QLPQPNLGVRTN-ALIDTPFLMKAETIR-LGTGIPQIFN-DEVVVPAFLN  
-----R-----G---VSLEDARDYSVV-GCVE-----LSIPGR  
-TYGL-----HDIAMFNL--LKVMEICLHENE-----GN-----  
-----AALTYEGLLEQIRAKISHYITLMVEGSNICDIGHRDWAPV--PLSSSFISDCLEK  
GRDITD---GGARY-----NFSGVQ-GIGIANLSDSLHALKGMIFDQQL--SFDELL--

SupplementalMultipleSequenceAlign.txt

-----SVLKANFA-----TPEG-----  
-----EKVRAR-----  
-----LINR--FEKYGNDIDEVDNISAE LLRHYCKEV-EKY--QNP--R----  
--GGYFTPGSYTVSA-HVPLG SVVGATPDGRFAGEQLADGGLSPMLGQDAQGPTAVLKS-  
-VSKLDN-TLLSN-----GTLLNVKFTPATLEGEAG--LRKLADFLRAFTQ-  
----LKLQHIQFNVVNADTLREAQQR PQDYAGLVVRVAGYSAFFVELSKEIQDDIIRRTA  
HQL-----

>gi|218551058|ref|YP\_002384849.1| putative formate acetyltransferase 2 [Escherichia  
fergusonii ATCC 35469]

-----MTNRIS-----

-----RLK-----TAL---FANTREISLERALLY  
TASHRQT-EGE-PVI-----LR---RAKATAYILEHVEISIRDE-ELIAGNRTVK-PR  
AGIMSPEND--PYWLLKELDQ---FPTRPQD--R-----  
---FAISEEDKRIYR-EELFPYW----EKRSMKDFINGQ---MTD-----  
-EVKAAT-----STQIFSINQ---TDKGQ-----  
-----GHIIIDYPRLL--NHGLGELVAQM QQHCCQQ-----PENHF  
YQAALLLLEASQKHILRYAELAETMAANC-TDAQRREELLTIAEISRHNAEHKPTFWQA  
CQLFWYMNIIILQYESNASS--LSLGRFDQYMLPFYQASLT----QGEDPAF-----L KEL  
LESLWVKCND-IVLL-RSTSSARYFAGFPTGYTAL---LGGL-TE-NGR--SAVNVLSFL  
CLDAYQSV-QLPQPNLGVRTN-ALIDTPFLMKTAETIR-LGTGIPQIFN-DEVVVP AFLN  
-----R-----G---VSLEDARDYSVV-GCVE-----LSIPGR  
-TYGL-----HDIAMFNL--LKVMEICLHENE-----GN-----  
-----AALSYEGLLGQIRAKISHYITLMVEGSNICDIGHRDWAPV--PLLSSFISDCLEK  
GRDITD----GGARY-----NFSGVQ-GIGIANLSDSLHALKGMVFEQQRL-SFDELL--  
-----SVLKANFA-----TPEG-----

-----EKVRAR-----  
-----LINR--FEKYGNDIDEVDNISAE LLRHYCKEV-EKY--QNP--R----  
--GGYFTPGSYTVSA-HVPLG AVVGATPDGRFAGEQLADGGLSPMLGQDAQGPTAVLKS-  
-VSKLDN-TLLSN-----GTLLNVKFTPATLEGEAG--LRKLADFLRAFTQ-  
----LKLQHIQFNVVNADTLREAQQR PQDYAGLVVRVAGYSAFFVELSKEIQDDIIRRTA  
HQL-----

>gi|209921435|ref|YP\_002295519.1| putative formate acetyltransferase 2 [Escherichia  
coli SE11]

-----MTNRIS-----

-----RLK-----TAL---FANTREISLERALLY  
TASHRQT-EGE-PVI-----LR---RAKATAYILEHVEISIRDE-ELIAGNRTVK-PR  
AGIMSPEND--PYWLLKELDQ---FPTRPQD--R-----  
---FAISEEDKRIYR-EELFPYW----EKRSMKDFINGQ---MTD-----  
-EVKAAT-----STQIFSINQ---TDKGQ-----  
-----GHIIIDYPRLL--NHGLGELVAQM QQHCCQQ-----PENHF  
YQAALLLLEASQKHILRYAELAETMAANC-TDAQRREELLTIAEISRHNAEHKPTFWQA  
CQLFWYMNIIILQYESNASS--LSLGRFDQYMLPFYQASLT----QGEDPAF-----L KEL  
LESLWVKCND-IVLL-RSTSSARYFAGFPTGYTAL---LGGL-TE-NGR--SAVNVLSFL  
CLDAYQSV-QLPQPNLGVRTN-ALIDTPFLMKTAETIR-LGTGIPQIFN-DEVVVP AFLN  
-----R-----G---VSLEDARDYSVV-GCVE-----LSIPGR  
-TYGL-----HDIAMFNL--LKVMEICLHENE-----GN-----  
-----ATLTYEGLLEQIRAKISHYITLMVEGSNICDIGHRDWAPV--PLLSSFISDCLEK  
GRDITD----GGARY-----NFSGVQ-GIGIANLSDSLHALKGMVFDQQRL-SFDELL--  
-----SVLKANFA-----TPEG-----

SupplementalMultipleSequenceAlign.txt

-----  
-----EKVRAR-----  
-----LINR--FEKYGNDIDEVDNISAE LLRH YCKEV-EKY--QNP--R----  
--GGYFTPGSYTVSA-HVPLG SVVGATPDGRFAGEQLADGGLSPMLGQDAQGPTAVLKS-  
-VSKLDN-TLLSN-----GTLLNVKFTPATLEGEAG--LRKLADFLRAFTQ-  
----LKLQHIQFN VVNADTLREAQQR PQDYAGLVVRVAGYSAFFVELSKEIQDDIIRRTA  
HQL-----

>gi|150388343|ref|YP\_001318392.1| pyruvate formate-lyase [Alkaliphilus  
metalliredigens QYMF]

-----  
-----MKNVVTYNEK  
ELRRSMTPRIE-----

-----AMR-----KEI-VH-SKPI-LCSERALLV  
TEAYAET-EAL-PSV-----TR----RAFALKKILGNMTQNI FEG-ELIVGSHGSNGRR  
SAPVFPEFS--TKWLEELDE--ILETRTQD--T-----  
---FIVPKNVKEDLK--DIFPYW----RGKTIH DRYRAM---LPD-----  
-ETKRAR-----DAYM FTRGL--FEQNGY-----  
-----GHTAYDIPKLL--KVGLVGIKSEVNEKMQTL DL-----TTSEGL---EKKLF  
YEGLIVCCDSVIAYAKRYAQRAL ELADQE-KNPVRKKELEKIADVCQWVPENPARDTWDA  
IQVVAFMQLIIQTETNGDS--VCPGRLDQYLYSYYKNDMA-E--GRYTIDE-----IQEL  
LDCLWIKLNE-IIKI-QASESVRIHPGFPMTPTVT---IGGQ-TP-EGE--DATNELSYL  
MLNSQEHI-RLTNPQFTVRFH-KDTPEDFKLRVVEVVK-LGTGMPAMFG-DEACIAALKR  
-----GCPDMPMERIRDYRIV-GCVELAP-----RGFQGR  
-----VNGGFLNV--ARVVDLALNNGV---DRLTNE-QI-----GP-QTG  
APE--DLKDFDDVLTAVRTQTAYFVKHQVINA AVVDMVQREHTPH--LFLSSLVEGCIEN  
GKDMTQ----GGSLW----GGTPIL-HVGEATAADSLIGVKKAVFDDQLI-SMKELK--  
-----EILDSNFA-----GAQ-----

-----GEKIYQ-----  
-----ALLA--MPKYGNDDDYADEVMQKMINIFFDEI-EKH--KDI--D----  
--GRFYTSTILT LGA-TVPHGWTTGATANGRKATMPVAD-SMSASNGADKEGPTAMLLS-  
-ASKIDQ-TRTIE-----GNVVNLKFTKMALEEKKN--LQQLVNLVSVYFDD  
----LKGQEIQVNVVDESTLKDAQEYPEKHQDLIIRVAGYSARFTELAKELQDDIIRRTE  
YNTL-----

>gi|218701339|ref|YP\_002408968.1| putative formate acetyltransferase 2 [Escherichia  
coli IAI39]

-----MTNRIS-----

-----RLK-----TAL---FANTREISLERALLY  
TASHRQT-EGE-PVI-----LR---RAKATAYILEHVEISIRDE-ELIAGNRTVK-PR  
AGIMSPEMD--PYWLLKELDQ---FPTRPQD--R-----  
---FAISEEDKRIYR-EELFPYW----EKRS MKDFINGQ---MTD-----  
-EVKAAT-----STQIF SINQ---TDKGQ-----  
-----GHIIIDYPRLL--NHGLGELVAQM QQCQQQ-----PENHF  
YQAALLLLEASQKHILRYAELAETMAANC-TDAQRRKELLTIAEISRHNAQH K PQTFWQA  
CQLFWYMNII LQYESNASS--LSLGRFDQYMLPFYQASLT---QGEDPAF-----L KEL  
LES LWKCN D-IVLL-RSTSSARYFAGFPTGYTAL---LGGL-TE-NGR--SAVNVLSFL  
CLDAYQSV-QLPQPNLGVRTN-ALIDTPFLMKTAETIR-LGTGIPQIFN-DEVVVP AFLN  
-----R-----G---VSLEDARDYSVV-GCVE-----LSIPGR  
-TYGL-----HDIAMFNL--LKVMEICLHENE-----GN-----  
-----AALTYEGLLEQIRAKISHYITLMVEG SNI CDIGH RDWAPV--PLLSFISDCLEK  
GRDITD----GGARY-----NFSGVQ-GIGIANLSDSLHALKGMVFEQQRL-SFDELL--  
-----SVLKANFA-----TPEG-----

-----EKVRAR-----















SupplementalMultipleSequenceAlign.txt

enterica subsp. enterica serovar Paratyphi B str. SPB7]

-----  
-----  
-----  
-----  
-----  
-----  
-----  
-----  
-----  
-----MTHRIQ-----  
-----  
-----RLK-----AAL-FQ-NHRE-ISLERALLY  
TASHQQT-EGE-PVI-----LR----RAKATAYILEHVEISIRDE-ELIAGNRTVK-PR  
AGIMSPEND--PYWLLNELDR---FPTRPQD--R-----  
---FDISEEDKRLYR-EVLFYW-----EKRSMKDFINGQ---MTD-----  
-EVKAAV-----STQIFSIQ---TDKGQ-----  
-----GHIIIDYPRLL--NNGLGELAAQMRARCEQQ-----PENDF  
YQAALLLLEASQRHILRYAVLAEQQAERC-PDARRRQELLTIAANSRHNAQHKPQTFWQA  
CQLFWYMNIIILQYESNASS--LSLGRFDQYMLPFYQTSFT----QGDDPAF-----LKEL  
LESLWVKCND-IVLL-RSTSSARYFAGFPTGYTAL---LGGL-TE-SGR--SAVNVLSFL  
CLDAYQSV-QLPQPNLGVRTN-ALIDTPFLKTAETIR-LGTGIPQIFN-DEVVVP AFLN  
-----R-----G---VSLEDARDYAVV-GCVE-----LSIPGR  
-TYGL-----HDIAMFNL--LKVMEISLYENE-----GN-----  
-----DTLTYEALLAHIRAKISHYITLMVEGSNICDIGHRDWAPV--PLLSSFISDCLEK  
GRDITD---GGARY-----NFSGVQ-GIGIANLSDSLHALNGLVFDQQL--SFDALL--  
-----SILKNNFA-----TPEG-----  
-----EKIRAR-----  
-----LINR--FEKYGNDIDNVDNISAEELLRYCKEV-EKY--QNP--R-----  
--GGQFTPGSYTVSA-HVPLGAVVGATPDGRFAGEQLADGGLSPMLGQDMQGPTAVLKS-  
-VSKLDN-TLLSN-----GTLLNVKFTPATLEGEAG--LRKLADFLRAFTQ-  
----LKLQHIQFNVVNADTLREAQLRPQDFAGLVVRVAGYSAFFVELSKEIQDDIIRRTA  
HQL-----

>gi|215489288|ref|YP\_002331719.1| putative formate acetyltransferase 2 [Escherichia coli O127:H6 str. E2348/69]

-----  
-----  
-----  
-----  
-----  
-----  
-----  
-----  
-----  
-----MTNRIS-----  
-----  
-----RLK-----TAL---FANTREISLERALLY  
TASHRQT-EGE-PVI-----MR----RAKATAYILEHVEISIRDE-ELIAGNRTVK-PR  
AGIMSPEND--PYWLLKELDQ---FPTRPQD--R-----  
---FAISEEDKRIYR-EELFPYW-----EKRSMKDFINGQ---MTD-----  
-EVKAAT-----STQIFSIQ---QTDKGQ-----  
-----GHIIIDYPRLL--NHGLGELVAQMQQHCQQ-----PENHF  
YQAALLLLEASQKHILRYAELAETMAASC-TDGPRREELLTIAEISRHNAEHKQTFWQA  
CQLFWYMNIIILQYESNASS--LSLGRFDQYMLPFYQASLT----QGEDPAF-----LKEL  
LESLWVKCND-IVLL-RSTSSARYFAGFPTGYTAL---LGGL-TE-NGR--SAVNVLSFL  
CLDAYQSV-QLPQPNLGVRTN-ALIDTPFLMKTAETIR-LGTGIPQIFN-DEVVVP AFLN  
-----R-----G---VSLEDARDYSVV-GCVE-----LSIPGR  
-TYG-L---HDIAMFNL--LKVMEICLHENE-----GN-----  
-----AALTYEGLLEQIRAKISHYITLMVEGSNICDIGHRDWAPV--PLLSSFISDCLEK  
GRDITD---GGARY-----NFSGVQ-GIGIANLSDSLHALKGMVFEQQL--SFDALL--  
-----SVLKANFA-----TPEG-----  
-----EKVRAR-----  
-----LINR--FEKYGNDIDEVDNISAEELLRHYCKEV-EKY--QNP--R-----  
--GGYFTPGSYTVSA-HVPLGSVVGATPDGRFAGEQLADGGLSPMLGQDAQGPTAVLKS-  
-VSKLDN-TLLSN-----GTLLNVKFTPATLEGEAG--LRKLADFLRAFTQ-  
----LKLQHIQFNVVNADTLREAQRPQDYAGLVVRVAGYSAFFVELSKEIQDDIIRRTA  
HQL-----

>gi|15804547|ref|NP\_290588.1| putative formate acetyltransferase 2 [Escherichia coli O157:H7 EDL933]







SupplementalMultipleSequenceAlign.txt

-----MSTERIA-----  
-----QLK-----KSY-IN-TKPS-ICVERAIAF  
TNSHKKT-EGE-AMI-----LR-----RAKAFKEVCKAVPVTFDQ-ELIVGTPGIY-KR  
SGFICPEFS--WQWVEKEMDD---FQNRSD--A-----  
---YLIGEEQKEILK-NDIFPYW-----VGKSLEEAFLSR---IPE-----E-  
-TRKIAV-----DTGIVDND--KWRSAV-----  
-----GEITPDYQDIIF-VKGFGGIRAEAMEKLRKLEP-----LSAEAL---EKINF  
YQAIIESCDGIINLAKRYSKKALEMAEAE-KDVKRKEELIRIHQVCKNIPENPPRSFYEA  
IQMVWFVQLGSILSENLA--LNLGRFDQMYPFYEKDLK-D--GKIKEE-----AQEL  
IEALWLKLSLSE-WVWA-ISKNTAQYFAGYNSFQNLT---VGGR-KR-DGS--DATNTISYM  
ALKASKNV-KTHQPGLSVRIH-PDSPQEFLIAVCDLIR-EGTGFPVAVHN-DRIGSQMLLA  
-----A-----G-----LSPEDARDWSNC-GCVV-----PHFR-K  
-VGE-W---TSAVNINL--AAALEYALNSGK---SRITKE-QM-----GL-KEE  
NHL--GMNSFKDIKDFYRQLSNLIKHGVISSVIAQQIHEMVPR--PFLSTLVDGCMMDK  
GVDLSK----GGAFY-----NIGPVLTGIGIADVANSMAIKKLVYEDKKI-TLNQLN--  
-----SALNNNWE-----D-Q-----  
-----EDLRK-----  
-----EALN--CPKYGNDIDEVDQIAVEISDFYNKEI-KKY--KDY--F----  
--GVPFNSAFMGISN-YIPAGSVIGATPDGRRSGDPLTE-GVSPHAGTDLTSPTAAMRS-  
-AAKINH-DIHTG-----GTLLNVKLSPELLKTDKS--LVNLASLIRAYFE-  
----LGAFHVQFNVISVDTLRKAQENPEAYRDLLVRVAGYSTQFVNLKQVQDAIIQRTT  
YANM-----

>gi|153940314|ref|YP\_001392534.1| formate acetyltransferase [Clostridium botulinum F str. Langeland]

-----MMTDRVK-----  
-----KLR-----EES-LK-AVPR-ISMERTRIV  
TDVYKKY-EGTVSIP-----VL-----RALVLKELMERKELCIYDG-ELIVGERGEA-AA  
ATPTYPELC---CHTVEDFDI---MDKREKI--S-----  
---FKTTDEDKEIQE-ELIIPFW-----EKRSMRHKILEK---MTP-----  
-EWKACY-----EAGIFTEFM---EQRGP-----  
-----GHTAGG-DKYY--KMGFLDIKEIQEIAISKLDYL-----NDDEAL---DKKEQ  
LDAMDIACDAIMIYGKRYSEYAAQLAQKE-ADTVRKKELMEISEVCSWVPAHAPRTFREA  
IQMYWVHLCVISELNPWDA-FNPGRLDQHLYPFYKKQIE-E--GTLDREL-----AREL  
LQCFWVKFNN-QPAPPKVGITLKESGTYTDFANIN---SGGM-KA-DGS--DGVNDVSYL  
VLEVIDEM-KLLQPSSNVQIS-KKTPQRFLKACEVIR-KGWGQPSIFN-ADSVVQELVR  
-----A-----G-----KSIEDARCGGTS-GCVE-----AGAFGK  
-EAY-----ILTYGFNL--PKILEITLLNGV---DSQTGK-QL-----GI-KTG  
DIS--TLKTYEDLLDAFKKQLKYFIDIKVNGNRVIERLYATLMPA--PFLSVVTDDCIAK  
GKDYNA----GGARY-----NTSYIQ-GVGIGITDLSAIIKYQVFDEKNI-TMEELM--  
-----EALRSNFE-----G-H-----  
-----EDIYNL-----  
-----VKNK--TPKYGNDDDYADEIMKEVFDAYYNEV-NGR--PNG--R-----  
--GGCYRIDMLPTTC-HVYFGAVINATPDGRKAHIPVSE-GISPSKGADVNGPTGVIKS-  
-AAKMDH--LRTG-----GTLLNQKFVPSVVQGEEG--IDNMANLVRAYFT-  
----MDGHHIQFNIVSKETLLKAQNPDEYKDLIVRVAGYSDFNNLDKVLQNEIIERTE  
QEFN-----

>gi|170754495|ref|YP\_001782822.1| formate acetyltransferase [Clostridium botulinum B1 str. Okra]

SupplementalMultipleSequenceAlign.txt

-----  
-----MMTDRVK-----  
-----  
-----KLR-----EES-LK-AVPR-ISMERTRIV  
TDVYKKY-EGIVSIP-----VL-----RALVLKELMERKELCIYDG-ELIVGERGEA-AA  
ATPTYPELC---CHTVEDFDI---MDKREKI--S-----  
---FKTTDEDKEIQE-ELIIPFW---EKRSRHKILEK---MTP-----  
-EWKACY-----EAGIFTEFM---EQRGP-----  
-----GHTAGG-DKYY--KMGFLDIKEIQIKEAISKLDYL-----NDDEAL---DKKEQ  
LDAMDIACDAIMIYGKRYSEYAAKLAQKE-ADPVRKKELMEISEVCSWVPAHAPRTFREA  
IQMYWVHLCVISELNPWDA-FNPGRLDQHLYPFYKKQIE-E--GTLDREQ-----AREL  
LQCFWVKFNN-QPAPPKVGITLKESGYTDFANIN---SGGM-KA-DGS--DGVNDVSYL  
VLEVIDEM-KLLQPSSNVQIS-KKTPQRFLKKACEVIR-KGWGQPSIFN-ADSVVQELVR  
-----A-----G---KSIEDARCGGTS-GCVE-----AGAFGK  
-EAY-----ILTGYFNL--PKILEITLLNGV---DSQTGK-QL-----GI-KTG  
DIS--TLKTYEDLLDAFKKQLKYFIDIKVNGNRVIERLYATLMPA--PFLSVVTDDCIAK  
GKDYNA---GGARY-----NTSYIQ-GVGIGTITDLSAIIKYQVFDEKNI-TMEELM--  
-----EALRSNFE-----G-H-----  
-----EDIYNL-----  
-----VKNK--TPKYGNDDDYADEIMKEVFDAYYNEV-NGR--PNG--R----  
--GGCYRIDMLPTTC-HVYFGSVINATPDGRKAHIPVSE-GISPSKGADVNGPTGVIKS-  
-AAKMDH--LRTG-----GTLNQQKFVPSVVQGEEG--IDNMANLVRAYFT-  
---MDGHHIQFNIVSKETLLKAQNPDEYKDLIVRVAGYSDFNNLDKVLQNEIIERTE  
QEFN-----

>gi|148381131|ref|YP\_001255672.1| formate acetyltransferase [Clostridium botulinum A str. ATCC 3502]

-----  
-----MMTDRVK-----  
-----  
-----KLR-----EES-LK-AVPR-ISMERTRIV  
TDVYKKY-EGTVSIP-----VL-----RALVLKELMERKELCIYDG-ELIVGERGEA-AA  
ATPTYPELC---CHTVEDFDI---MDKREKI--S-----  
---FKTTDEDKEIQE-ELIIPFW---EKRSRHKILEK---MTP-----  
-EWKACY-----EAGIFTEFM---EQRGP-----  
-----GHTAGG-DKYY--KMGFLDIKEIQIKEAISKLDYL-----NDDEAL---DKKEQ  
LDAMDIACDAIMIYGKRYSEYAAKLAQKE-ADPVRKKELMEISEVCSWVPAHAPRTFREA  
IQMYWVHLCVISELNPWDA-FNPGRLDQHLYPFYKKQIE-E--GTLDREQ-----AREL  
LQCFWVKFNN-QPAPPKVGITLKESGYTDFANIN---SGGM-KA-DGS--DGVNDVSYL  
VLEVIDEM-KLLQPSSNVQIS-KKTPQRFLKKACEVIR-KGWGQPSIFN-ADSVVQELVR  
-----A-----G---KSIEDARCGGTS-GCVE-----AGAFGK  
-EAY-----ILTGYFNL--PKILEITLLNGV---DSQTGK-QL-----GI-KTG  
DIS--TLKTYEDLLDAFKKQLKYFVDIKVNGNRVIERLYATLMPA--PFLSVVTDDCIAK  
GKDYNA---GGARY-----NTSYIQ-GVGIGTITDLSAIIKYQVFDEKNI-TMEELM--  
-----EALRFNFE-----G-H-----  
-----EDIYNL-----  
-----VKNK--TPKYGNDDDYADEIMKEVFDAYYNEV-NGR--PNG--R----  
--EGCYRIDMLPTTC-HVYFGSVINATPDGRKAHIPVSE-GISPSKGADVNGPTGVIKS-  
-AAKMDH--LRTG-----GTLNQQKFVPSVVQGEEG--IDNMANLVRGYFT-  
---MDGHHIQFNIVSKETLLKAQNPDEYKDLIVRVAGYSDFNNLDKVLQNEIIERTE  
QEFN-----

>gi|150388421|ref|YP\_001318470.1| formate C-acetyltransferase [Alkaliphilus metalliredigens QYMF]

SupplementalMultipleSequenceAlign.txt

-----M  
EELRGINARTK-----  
-----KLR-----KQS--ETIHPS-ISIERAVLM  
TQAYEKY-SGKVSEP-----ML----RALSFKHLMENKTICINDD-ELIVGERGPT-PQ  
SAPTYPELC---CHTIEDLEM---MNDREKI--S-----  
---FTVTAEDKKIQR-EKIIPYW-----QGKSIRDFIFNE---MTE-----  
-EWKDCY-----HGGIFTEFM---EQRAP-----  
-----GHTVGD-DKIY--KRGFLDFKLEIMEQLESLDYY-----NDIEAY---EKQEQ  
LKAMEICADAIIFAHRHAEKAKELAENE-ENPQKKRELEKIAEVCLRVPALPPGNFWEA  
LQSYWVHVLGVITELNTWDA-FCPGRLDQHLHPFYQKGIE-G--GTLTPQG-----AKEL  
LECFWVKFNN-QPAPPKVGITLQESGYTDFANIN---IGGL-KI-DGS--DGVNEVSYL  
LLEVIDEM-KLLQPSSNIQVS-KKNPDYFIKAAEVIR-KGWGQPSVFN-ADAVVEELLR  
-----Q-----G---KSIEDARCGGTS-GCVE-----TGAFGK  
-ESF-----ILTGYFNL--TKVLEITLNGF---DPVTGK-KI-----GV-QTE  
VVE--NLHSFKALFEAFKVLNHFIDIKIKGNIIIEKLYAHYMPS--PFLSILIDDCIKN  
AKDYNA---GGTRY-----NTNYIQ-GVGIASITDSL SAIKSHVFDDKLF-TLRQLM--  
-----ETLHVDFK-----G-H-----  
-----EPIRQL-----  
-----LLNK--TPRYGNDDYVDSIMVKVDFAFYQAV-NGR--KTM--R----  
--GGTYRINMLPTTC-HVYFGSVIGATPDGRKAGRPLSE-GISPVQGTDKKGP TAVIKS-  
-ASKMDQ--LKTG-----GTLLNQKFTPNMLEGEAG--LENVVHLVRSYFR-  
----LDGHHIQFNVVDAATLKKAQANPEAYQNLIVRVAGYSDFNNLNKGLQDEIIARTE  
HQAM-----  
>gi|170760792|ref|YP\_001788503.1| formate acetyltransferase [Clostridium botulinum  
A3 str. Loch Maree]

-----MMTGRVK-----  
-----KLR-----EES-LK-AVPR-ISMERTRIV  
TYVYKKY-EGTVSIP-----VL----RALVRELMEKELCIYDG-ELIVGERGEA-AA  
ATPTYPELC---CHTVEFDI---MDKREKI--S-----  
---FKTTDEDKEIQE-ELIIPFW-----EKRSMRHKILEK---MTP-----  
-EWKACY-----EAGIFTEFM---EQRGP-----  
-----GHTAGG-DKYY--KMGFLDIKEIQIKEAISKLDYL-----NDDEAL---DKKEQ  
LDAMDIACDAIMIYGKRYSEYAAKLAQKE-ADPVRKKELMEISEVCSWVPAHAPRTFREA  
IQMYWVHLCVISELNPWDA-FNPGRLDQHLYPFYKKEIE-E--ETLDREQ-----AREL  
LQCFWVKFNN-QPAPPKVGITLQESGYTDFANIN---SGGM-KA-DGS--DGVNDVSYL  
VLEVIDEM-KLLQPSSNVQIS-KKTPQRFLKACEVIR-KGWGQPSIFN-ADSVVQELVR  
-----A-----G---KSIEDARCGGTS-GCVE-----AGAFGR  
-EAY-----ILTGYFNL--PKILEITLLNGV---DSQTGK-QL-----GI-KTG  
DIS--ALKTYEDLLDAFKKQLKYFVDIKVNGNRVIERLYATLMPA--PFLSVVTDDCIAK  
GKDYNA---GGARY-----NTSYIQ-GVGIGTITDSL SAIKYQVFDEKNI-TMEELM--  
-----EALRSNFE-----G-H-----  
-----EDIYNL-----  
-----VKNK--TPKYGNDDYADEIMKEVFDAYYNEV-NGR--PNG--R----  
--GGCYRIDMLPTTC-HVYFGSVINATPDGRKAHIPVSE-GISPSKGADVNGPTGVIKS-  
-AAKMDH--LRTG-----GTLLNQKFVPSVVQGEEG--IDNMANLVRAYFT-  
----MDGHHIQFNIVSKETLLKAQNPDEYKDLIVRVAGYSDFNNLDKVLQNEIIERTE  
QEFN-----  
>gi|57640224|ref|YP\_182702.1| pyruvate-formate lyase [Thermococcus kodakarensis  
KOD1]

SupplementalMultipleSequenceAlign.txt

SSIRPINERVA-----  
-----KLR-----EES---VNTEVRISSEARLI  
TEFYKSDLAKGSIP-----VQ-----RALAFKYLLEHCSLPVEDG-QLIVGIRGTG-VK  
EVPTYPEIT---VHSIEDLEI---LNSRENM--P-----  
---YRVDEETKELYE-REIIPFW-----KGRAMRDIIIFEN---LPQ-----  
-EWIDAY-----EAGVWTEFM---EQRAP-----  
-----GHTAGG-ERIF--KMGVLDIKEEIRKMEELDP-----SDPEYY---EKMEE  
LKAMDIVADAILIYARRYAЕКLEKMAEEE-TDPKRKEELKQMAEICRWVPAHPRTFWEA  
LQHYWFIHVGVTYETNPWDS-FNPGRIDQHLYPFYKKDIE-E--GRLTREK-----AKEL  
LQCFWLKFN--QPAVVKVGTAAESFTYNDFSKLN---VGGL-KE-DGS--DGVNELSYL  
ILEVLGEM-RTLQPNTAVLVS-EKNPDCLLIEALKVVG-PGFGEPFFNFDGVIVKMLRQ  
-----G---KSLEDARTSGVS-GCVE-----SGAFGK  
-EAY-----ILTGYFNL--PKILEITLNGV---DPRTGK-KI-----GL-ETG  
DPR--DFKSFEELWEAFMKQVKHFLDIKMKGNDIIEALYAKYLPV--PFLSLWIEDCVEK  
AKDYNC-----GGARY-----NTQYIQ-VVGLGTIADSLAAIKYHVFDKKTf-TMDALL--  
-----KALKNNWK-----G-Y-----  
-----EIMREI-----  
-----LRNPKTPKFGNDDDYVDEIAKRVVDEVVDLI-ESY--PPSPVR-----  
--KASKRAYFLPTTV-HVYFGKVTGATPDGREAGFPVSE-GVSPVQGMDRKGIAAVFRS-  
-VAKCDW--DKTG-----GALLNQKLTPDIFDSEEN--IKKLAQLIRTFFR-  
----LGGHHVQFNVSSELLREAQRKQDFQDLMVRVAGYSDFVNLPEGLQEEIVQRTE  
QELL-----

>gi|39997199|ref|NP\_953150.1| formate acetyltransferase [Geobacter sulfurreducens PCA]

-----MTERTR-----  
-----ELR-----RRS-LE-ARPA-ISAERALLL  
TEFYREN-EGKYSVP-----VM-----RALSFLHICRHKTIWIGEG-ELVVGERGPE-PK  
AVPTYPELT---CHSLEDLRI---LDSRPLT--S-----  
-YAVSAECLAAYE-ETVIPYW-----RGRSLRDKMFGE---LAP-----  
-EWHEAY-----AAGIFTEFM---EQRAP-----  
-----GHTVLD-EKPF--RRGLLDFKADIAREIGRLDFV-----QDGAAW---EKREQ  
LRAMAISCDAAILFAERHAGLADEMAARE-TDPHRKRELERIAEVCRHVPAPAPRDFHEA  
LQAYWFCHLAIITELNGWDA-MSPGHLDQHLLPFYEQGLA-H--GSLSRDA-----AREL  
LECFVVKFN--HPAPPKVGVTAAESGTYTDFANIN---LGGL-LP-DGS--DGSNEVSHL  
LLDIIDEM-HLLQPSSNIQLS-RKSPDAFLSHALRVIR-NGYGFPSIFN-ADSVVEEQLR  
-----Q-----G---KSLVDARAGGCS-GCVE-----VGAFGK  
-EAY-----ILTGYFNL--VKLLELALHNGV---DPRTGR-QL-----GP-ASG  
DPS--GFASFDDLAAFEAQLRHFIKIMAGNQLIEQIYCRMLPA--PFLSVLIDDCIAT  
GRDYNA-----GGARY-----NNTFIQ-GVGIGSITDSL SAIKALVYDSGHI-ALPDLV--  
-----AALDADFA-----G-Q-----  
-----EPLRQR-----  
-----LLNR--TSKYGNDDDYADDLMRRVFESFFRTV-DGR--PNS--K-----  
--GGQYRIEMLPTTC-HVYFGSVTGATPDGRRAGTPLSE-GISPVQGADRSGPTAVIKS-  
-AGKMDH--IRTG-----GTLLNMKFAPSLVEGEQG--ISTMASLVRYSYFR-  
----MDGHHVQFNVRADTLRAAQADPDAHRDLIVRVAGYSDFCDLSRELQDEIITRTE  
HDSL-----

>gi|170290137|ref|YP\_001736953.1| formate C-acetyltransferase [Candidatus Korarchaeum cryptofilum OPF8]

-----MTLTTPEASCEVKISKEVEKRR  
SVIRPINERIA-----

SupplementalMultipleSequenceAlign.txt

-----RLR-----EES---VNAQVKVSLERAKLI  
TEFYKSDIPKGSIP-----VQ----RALAFKYLMEVSLPIEEG-QLIVGLRGTG-VK  
EVPTYPEIC---VHSLEDLEI---LDKRKNM--P-----  
---YKVDEETKEFYE-REAIIPFW----RGRAMRDIIIFES---LPE-----  
-EWIDAY-----EAGVWTEFM---EQRAP-----  
-----GHTAGG-ERIF--RMGVLDIKEQIRRKMESLDP-----SDPEYY---EKMEE  
LKAMDIVADAIMIYARRYA EKLEQMAKEE-KDPERKKELEQMAEICRWVPAHAPRTFWEA  
LQHYWFVHVGVVYETNPWDS-FNPGRIDQHLYPFYKRDIE-E--GRLTRER-----AKEL  
LQAFWLKFNN-QPAVPKVGVTA EESFTYNDFSKLN---LGGL-TK-DGK--DGVNELSYL  
ILEVLDEM-RTLQPNTAVLIS-EKNPDSFLIKALKVVG-PGFGPEPPFFNFDGVIVKMLRQ  
-----G---KSLEDARTSGVS-GCVE-----SGSFGK  
-ECY-----ILTYGFNL--PKILEITLNGV---DPRTGK-KI-----GL-ETG  
DPR--EFKSFEDLWNAFIKQVKYFLDIKMKGNDIIEALYAKYLPV--PFLSLWIDDCEK  
AKDYNA---GGARY-----NTQYIQ-VVGLGTITDSLAAIKYHVFEKGTV-SMSELL--  
-----DALSKNFE-----G-Y-----  
-----EFLREI-----  
-----LRNPKDKPKFGNDDDYADSI AKEVVDRIVELI-ESY--PRSPVR----  
--KASRRAYFLPTTV-HVYFGKVTGATPDGRVAGFPVSE-GISPVQGMDDRRGIAAVFRS-  
-VAKCDW--DKTG-----GALLNQKLTDPIDFNEEN--LRKLAQLIRAFFR-  
----LGGHHVQFNVVSAELLREAQRPPQDFQDLMVRVAGYSDFVNL PKGLQDEIIERTE  
HKSL-----

>gi|77918545|ref|YP\_356360.1| pyruvate-formate lyase [Pelobacter carbinolicus DSM 2380]

-----MAGSCCG-----  
-----  
-----  
-----  
-----GIAEGAT  
RKKFELPERIQ-----

-----RLK-----DAY-LQ-VKPS-IAIGRALAF  
TEVTRQN-PGM-PEI-----LR----RALAFKKACEDAPLLIQTD-ELIVGHPCGK-PR  
AGAFSPDIA--WKWRDELDT---IGTRSQD--P-----  
---FVFSEEDKKIMR-EEIFPFW-----EGRSLDEICETQ---YRE-----  
-AGLWEF-----AAEAFVSDLSY--HQVNGG-----  
-----GDTCPGFDVILF-TKGVSGIKAEAEHLAKLSM-----DVPDDI---DRIYF  
YKAAIQTCEGIVTYANRVSA YAKELAEKE-QDPKRKAELEKIAEVNARVPANPPSSFQEA  
LQSIWTIESLFVIEENQTG--LSLGRLDQYVYPCYEADIK-A--GVIDEDQ-----AFEL  
MSCFIIKCAE-MMWL-TSELA AKYFAGYQPFINLC---VGGQ-KR-EGG--DATNDLTYL  
VMDVVRKL-GVYQPSLACRIH-NQSPQKYLQKIVEVVK-AGLGF PACHF-DDAHIKMMMLR  
-----K-----G---YDFEDARDYCLM-GCVE-----PQKSGR  
-IYQ-W---TSTGYTQW--PVAIEFVLNRGV---MKWHGT-KQ-----GI-DTG  
DLD--QFATYEQFDA AVKEQIEYICKLSAVGTVISQRVHRDVAPK--PMMSLFVEGCMET  
GKDVSA---GGAVL-----NHGPGLIFSGLATYADSMASIKKLVYDDKKY-TLADFQ--  
-----KALDANWE-----G-Y-----  
-----EQMRQ-----  
-----DCLD--APKYGNDDDYADKIAADLVEFTEKAC-RQF--KML--Y----  
---STM SHGTL S ISN-NTPIGEITGATDGRLAFTPLSD-GISPVQGADKMGPTAIK S-  
-VSKMNS-ESMNI-----GMVHNFKLMEGILETPEG--EAGLITLLRTASI-  
----LGNGQM QFSYVDNEVLKQAQQSPEEYRDL MIRVAGYSAFFVELCKEVQDEIISRTT  
LSGF-----

>gi|188587082|ref|YP\_001918627.1| Formate C-acetyltransferase [Natranaerobius thermophilus JW/NM-WN-LF]

-----  
-----  
-----  
-----  
-----MENNS  
RNSESMSPRVK-----

SupplementalMultipleSequenceAlign.txt

-----KLR-----EQS-VS-KNPK-VSVERAILV  
TQAYKKY-DGNVSIP-----IL---RALTFKHILENKSISINDG-ELIVGERGPA-PQ  
EVPTYELC---THSITDLEI---IHDREKV--F-----  
---FEVDETVKKIQD-SDIIPFW-----KGKSMREKIFDN---MSR-----  
-EWLDCY-----EAGIFT-EF--MEQRAP-----  
-----GHTVAD-GKIY--QKGLLDFRDDIDLELKNIDEI-----NDPQAY---EKSEQ  
LKAMRVCIDALIEFAQRYANIAEELAQEV-DDSHRKEELLKIAEICKRVPKAPRNFWEA  
LQYYWVHVLGVITELNTWDS-FCPGRLDQHLYPFYLQDLN-A--GELTRGS-----AKEL  
LQCFWIKFNN-QPAPPKVGTTLKESGTYTDFCNIN---IGGV-TP-EGF--DGVNDVSYL  
LLEVIDEM-QLVQPSTNIQVS-KQNPNEFIKEAGKIIR-KGWGQPSVFN-TDAVISELLN  
-----Q-----G---KDLVDARCGGTS-GCVE-----AGTFGK  
-ESY-----ILTGYFNL--TKILELTLYRGV---DPRSGK-QI-----GL-KTD  
DPE--TFDSFQDLIDAFNEQLNYFIDIKIRGNIIIEKLYDKYMPS--PFLSVIIDDICK  
AKDYSN---GGARY-----NTRYIQ-GVGIGTITDSLTAIKHHIFEKQNY-TWNELL--  
-----TALQNNFE-----G-F-----  
-----KQMRGF-----  
-----LKNK--TPRYGNDDDSADDLMKEVFQRFYDAV-NGR--KTM--T----  
--GGTYRINMLPTTC-HVYFGSVIGATPEGRLRGTPLESE-GISPVQSADQEGPTAALKS-  
-AAKMDH--IKTG-----GTLLNLKFTPPQVLQGEEG--LLNLVYLVRYSYFR-  
----MNGHHVQFNVDAETLKDAQRNPDSYRNLIVRVAGYSDFNNLNENLQNEIIKRT  
HSIG-----

>gi|126700901|ref|YP\_001089798.1| putative formate acetyltransferase [Clostridium  
difficile 630]

-----MARGTFERTK-----  
-----KLR-----EES-IN-AEPH-ISIERAVLM  
TEAYKKY-EGSVEIP-----VL---RALSFKHYIENRTLSINDG-ELIVGKGDSPN  
GAPTYPEIC---CHTMEDLEV---MHNDRDII--N-----  
---FSVSEEARKIHK-EEIIPFW-----KKRQTRDKIINA---MTP-----  
-EWLAAY-----EAGMFTFEM---EQRAP-----  
-----GHTVCG-DTIY--KKGFLDLKKDIEARLKELDLFL-----NDLDAY---NKKAD  
LEAMAIACDAMVILGKRYAEKARQMAEEE-TDEAKKKDLLLIAETCDVVPAPHKPETYHQA  
IQMYWVHIGVTTELNIWDA-FTPGRLDQHLNPFYERDVE-N--GILDRDR-----AQEL  
LECLWVKFNN-QPAPPKVGITLKESSTYTDANIN---TGGI-NP-DGQ--DGVNEVSYI  
ILDVMDM-KLIQPSSNVQIS-KKTPQKFLKRACEISR-KGWGQPAFYN-TEAIVQELME  
-----A-----G---KTIEDARLGGTS-GCVE-----TGCFGK  
-EAY-----VLTGYMNI--PKILELTLNNGY---DPISKK-QI-----GI-ETG  
DPR--NFQSYEELFEAFKKQLHYMIDIKIEGNAVIENICAKHMPC--PLMSTIVDDCIEK  
GKDYQR---GGARY-----NTRYIQ-GVGIGTITDSLTAIKYNVFDKCKF-DMDTLL--  
-----KALDVNFE-----G-Y-----  
-----EAILNL-----  
-----VSNK--TPKYGNDDDYADEIMQEIFNAYYNEV-TGR--PTV--C----  
--GGEYRVDMLPTTC-HIYFGEIMGASPNRGLCAKPVSE-GISPEKGGDTNGPTAVIKS-  
-CAKMDH--IKTG-----GTLLNQRFAPSVVQGEKG--LDNMANLVRAYFN-  
----MDGHHIQFNVFDKNVLLAQKNPQDYKDLIVRVAGYSDHFNNLSRTLQDEIIGRTE  
QTF-----

>gi|78356320|ref|YP\_387769.1| formate C-acetyltransferase [Desulfovibrio  
desulfuricans subsp. desulfuricans str. G20]

-----MQCCTTPLSPHEQRLQDKIAGKE  
DSFRKSHERVF-----  
-----NIL-----DSF--DGKRPR-IDVERAKLF

SupplementalMultipleSequenceAlign.txt

TDSMKET-EGQ-PLV-----LR-----WAKAMKHVAEHITVYIDDD-QLICGRGGCP-GR  
YGVLYPELD--GDFLDLAIED---LPNRTESS--P-----  
---FTITEADARVVV-EEIAPYW----KGKTYHEDLNLA---LPS-----  
-DVHKLK-----YDDPQGLKSRFIVNET--SSFRSS-----  
-----IQVVDHYEKVL--KRGFRGLKEEAQEKIAGLDPL-----SPRDNV---EKRPF  
LEAIVIVCDAILWANRHAKLAADMAAAE-TNPVRKAELETMAEICAWVPENPARNFYEA  
VQAQWFTQMFSRLEQKTGTI-VSNGRMDQYFWPFYRKDIE-E--GRITEES-----ALEL  
LECMWVGMAQ-YVDLYISPAGGAFNEGYAHWEAVT---IGGQ-TP-QGL--DATNDLTYL  
FLKSKREF-PLHYPDLAARIH-SRSPERYLHDVAETIK-FGSGFPKLIN-DEEIVPLYVS  
-----K-----G---ASFEEALDYAVS-GCTE-----ARMPNR  
DTYT-----SGGAYINF--AAALEMVLNNGR---MLKYGENEL-----GL-ETG  
DPT--RFETWEEFWNAYVLQHEHFLRAAFIQQHIINNVRRARHFAQ--PMGSALHDLCMKH  
CLDLHTPQIPEGI-----NLGYFE-YMGFGTVVDSLAAIKKLVFEDKKL-TMQEVI--  
-----EALKCNFE-----G-K-----  
-----EDVQQ-----  
-----MLKS--APCYGNNDEYADSIAREIDAISVKYG-RRYS-PEL-----  
--GMHNDVRYVPFTS-HVPFGKVVSATPNGRLAWTPLSD-GSSASHGADVNGPTAVLQSN  
FSSKNYG-YRDRA-----ARMLNIKFTPKCVEGDEG--TEKLVSFIRTFCD-  
----LKLWHVQFNVINRDTLIAAQKDPEKYRSLIVRIAGYSAYFVDLSPDLQNDLIARTQ  
HDAM-----  
>gi|150389759|ref|YP\_001319808.1| formate C-acetyltransferase [Alkaliphilus  
metalliredigens QYMF]

-----  
-----  
-----  
-----  
-----  
-----  
-----  
-----  
-----MITERIE-----  
-----  
-----SSR-----QNY-IN-AKPA-ISYERARIW  
TESHKKT-EGE-SVV-----IR----RAKAFRDTCEQINVTIFGE-ELIVGSIGEF-RK  
CGILTPEFS--WTWVDREMDN---FDERVQD--P-----  
---YVMTDEQRTFVR-KKIFPYW----KGKSLEEAFLAQ---LPE-----  
-KTAKVA-----V-DTGIVDNDS--KWRQAV-----  
-----GEMTPDYQDVLV-F-KKGFGGIIKEAKEHIIKLSL-----TSAEDM---KKKDF  
YNSIIITSEGMITLANRYGQKATEMADIE-NNPIRKGELLKIADICGRIPENPPDTFYEA  
IQFVWFTQVGGIISENPLA--LNIGRFQDFMYPYKSDVD-K--GIITKDE-----AQEL  
IEALWIKLSE-WVWT-ISANTAEFFAGYNQFQNLT---VGGK-TR-EGK--DATNDLSYM  
CLKATERV-KTHQPGLSVRVH-QDSPRSFLDAVTHLVS-KGTGFPAIHN-DTAGYQMLIN  
-----A-----G---YEPEDARDWNNC-GCVV-----PHFRKT  
--GE-W----TSAVNINF--TAALEFALNQGE---SRITGE-KI-----GM-DED  
KPT--TFQSYEEVEKAFYKQFDNLIHSHIATLLAQKLHKEMVPR--PFLSSCIEECMIK  
GKDLVD---AGAKY-----NLGPVLTGIGLAVTSNSLAVIKKLVFEDKMT-TMETLI--  
-----KALDANWE-----G-Y-----  
-----EKLKQ-----  
-----LAVS--VPKYGNVVDYVDDIAIKIANYYYYKQG-HKY--KDI--N----  
--GNNFNATFMGISN-YLPTGKVVGATPCGRKAKEPLSE-GVSPFAGSDTSTPLEAMRS-  
-AAKLNQ-DVHSG-----GTLLNRLNEDLVNTRKG--QSNLGFMIQSFFA-  
----LGAFHVQFNTISTDTLRKAQNNPQDYKDLLVRVAGYSTQFVNLSKSMQEAIIARTA  
HENY-----  
>gi|224371979|ref|YP\_002606145.1| Pf1D2 [Desulfobacterium autotrophicum HRM2]



SupplementalMultipleSequenceAlign.txt

---FRVDPGDMKIYR-DEIIPYW-----RGRSMRDRVFEH---LPL-----  
-PWQKAY-----GAGLTFTEFM---EQRAP-----  
-----GHTALD-GTIY--QKGMTDFKQEI AQGLEALDYL-----HDPQAQ---ERSDA  
LTAMDISCDAAILFAQRHARLAEEMAAQE-TRPARKKELLEIARVCRRIPAERPTSLWEA  
IQMYWVHGLGTITELNGWDA-MSPGHL DQHL YPFYMRLE-L--GTMDADG-----AKEL  
ISCLWIKINN-HPAPPKVGVTAKESGTYNDFTNIN---LGGL-TR-QGA--DAVNDLSYI  
MLDVIDEL-KLLQPQSNVQIS-ERTPYHFLKAACRVIR-NGYGYPSVFNADQVVLEQVRV  
-----G---KRIEDAREGGCS-GCIE-----TGAFGK  
-EAY-----ILTGYLNL--PKLLELTLNNGR---DPLGGG-MV-----GL-ETG  
DPR--GFETFDQLYDAFTRQLAHVVDLKIRVNNYIERMFAANAPA--PFLSVVIQDCIAK  
GKDYYN---GGPRY-----NTNYIQ-CCGIGTITDSL SAIKKHVFDKIV-TMELL--  
-----KALADNFK-----G-H-----  
-----EALRLR-----  
-----LLNK--TPFFGNDDRADQIMVQVYDSL FSAI-DGQ--PNT--K----  
--NGEYHLNMLSTTC-HVYFGKKGASANGRFSGLPESD-GTSPSHGADRNGPTAVIKS-  
-LGKMDQ--SKSG-----GTLNQRFLPGVLKTEQD--LDKLAGLIRTYFK-  
----FGGHHIQFNVDVTQTLKRAQEHDPQYRNL LVRVAGYSDFVDLDRDHQEEIISRHE  
HRGL-----

>gi|157364003|ref|YP\_001470770.1| formate C-acetyltransferase [Thermotoga lettingae TMO]

-----MERTKIYEELEKRR  
SAIKPINKRIK-----  
-----KLR-----DES---VSAKAKVSLERAKLI  
TDFYKMA-PKNVSYP-----VL----RALAFKYL MENC SL PVEDG-QLIIGIRGTG-PK  
EVPTYPEIC---VHTLEDLET---LATRKNM--P-----  
---FQVDSQTRKVYE-EEIIPFW---QGQAMRDILFQN---LPA-----  
-EWKRAY-----EAGIWTEFM---EQRAP-----  
-----GHTSGG-GWIF--KTGVLDIKKRIE EKIQLSA-----SDPEYF---EKLEE  
LKAMNISCDAILIYAKRYSEK LK KLSENE-KDPQRKQELLEMSRICEKVP AHAPETFWEA  
LQHYWFIHV GITYETNPWDS-FTPGRLDQH VYK FYAKDIA-S--GVL TREK-----AKEL  
LQAFWLKFN N-QPSVPKVKITAEESFTYNDFSKIN---IGGL-KT-DGS--NAVNELSYL  
ILEVLSEM-RTLQPNTAALIS-DKNPDAFL LKALEALS-PGFGEPL FNYDRIVVKMLRQ  
-----G---KTLEDARESGVS-GCVE-----TGALGK  
-EAY-----ILTGYLNL--PKILEITLNGGI---DPGTGK-RI-----GL-ETK  
KPQ----NFDELWDFFAKQLRYFIDIKMKGNDIIEALYAKYLPV--PFMSLWIQDCVEN  
AKDYNA---GGARY-----NTQYIQ-FVGLGTVTD SLASIKWNI FDRKLF-TYE EML--  
-----KALHND FQ-----G-F-----  
-----EYMRQI-----  
-----FLNK--TPKYGNDNDYADDIAK KLV DYIVQIV-ESY--EPSPVR----  
--KASRRCYFLPTTV-HVYFGSVT GATPDGRKAGMPVSE-GISPVQGVDRKGI AAVFNS-  
-VCKCDW--DKTG-----GALLNQRLTPDLVKEKDN--LEKLGKLIRTYFR-  
----MGGHHVQFN VVSS ELLREAQKKPADFEDLMVRVAGYSDFVSLPKGLQEEIIARTE  
QDEL-----

>gi|120601541|ref|YP\_965941.1| formate C-acetyltransferase [Desulfovibrio vulgaris subsp. vulgaris DP4]

-----MQCCNQLSPHEQRLQDKIEGKV  
DRYRATHERVF-----  
-----TIL-----ESF--DNTRPR-IDVERAKYF  
TESMKAT-EGQ-PLP-----LR---WAKALMHIAENMTVYIDDH-QLICGRAGYQ-GR  
YGVLYPELD--GDFLGTAIED---LPNRAES--P-----  
----FAITPEDARVVV-EEIAPFW-----KGKTYHEALNLA---LPA-----

SupplementalMultipleSequenceAlign.txt

-DVHKL-----YDDPQGLMSRFIVNET--SSFRSS-----  
-----IQWVHDYEKVL--KRGFRSIKKEEAEKIAALDPM-----SPCDNV---EKRPF  
LEAIVIVCDAILWAKRHAKLAAELAAKE-TDPTKRKRELETMAEICAWVPENPARTFHEA  
VQAQWFTQVFSRIEQKTGTI-VSNGRMDQYFWPFYEKDLA-E--GRITEDS-----ALEL  
LECMWVGMAQ-YVDLYISPTGGAFNEGYAHWEAVT---IGGQ-TP-EGR--DATNDLTYL  
FLKSKREF-PLHYPDLAARIH-SRSPERYLWEVAETIK-DGSGFPKLIN-DEEVVPLYVS  
-----K-----G---ATFAEALDYAVS-GCTE-----ARMPNR  
DTYT-----SGGAYINF--AAALEMVLVNGK---MLKYGDTDL-----GA-HTG  
DPR--EFKTWEEFWNAYVTQHQLFLKTAQVQHIINNLRARHFAQ--PMGSSLHDLCMKH  
CLDLHTPQIPEGI-----NLGYFE-YMGFGTVVDSLAIKKLVFEDKKL-TMDELI--  
-----EALKCNFE-----G-K-----  
-----EDIQQ-----  
-----LLKS--APCYGNDDYADSIACDIDALSVKYG-RRYS-PEL-----  
--GMHNDVRYVPFTS-HVPFGRVVSATPNGRKAWALS-D-GSSASHGADVNGPTAILQSN  
FNSKNYG-MRDRA-----ARMLNIKFTPKCVEGEEG--SQKLVSFIRTFCD-  
-----LKLWHVQFNVINKEITLLAAQRDPEKYRNLIVRIAGYSAYFVDLSPDLQNDLIARTG  
HDVM-----

>gi|220904704|ref|YP\_002480016.1| Formate C-acetyltransferase [Desulfovibrio  
desulfuricans subsp. desulfuricans str. ATCC 27774]

-----MSMTTCECRSPQEQLYDKIEGRE  
DRFRKTHPRVF-----

-----RLL-----ERF--EGQKPR-IDIERALYF  
TQSMQET-EGQ-PLV-----LR---WAKALMHIARNMTVYVQED-QLLLGRAGCD-GR  
YGILYPELD--GDFLDIAVRD---LPTRKTS--P-----  
--ATITPEDARRVV-EEIAPYW-----KGKTYHEALNAA---LPA-----  
-EVHKL-----YDDPEGLISRFIVNET--SSFRSS-----  
-----IQWVHDYEKIL--KRGFNSIKKEAREKLAALDPL-----SAKDDR---EKRPF  
LEAVMIVCDAILVWAKRHAVLAREMAEKE-SDPVRKAELLRMAENAHEVPGEPARDFWEA  
CQSQWFTQMFSRIEQKTGTT-ISNGRMDQYFQPYKQDRE-A--GKITEAQ-----AMEL  
LECMWVGMAE-FIDMYISPTGGAFNEGYAHWEAVT---VGGQ-TP-DGR--DASNDLTYL  
ILKSKREF-PLHYPDLAARIH-SRAPERYLWDVAETIK-YGSGFPKLIN-DEEIVPLYVS  
-----K-----G---ATFEEALDYAVS-GCTE-----ARMPNR  
DTYT-----SGGAYINF--AAAVEMVLNRNGR---MKKYGDQKL-----GV-ETG  
DPR--SFTTWDQFWNAYVEQHLLFLKTAFTQYIINKLRAEHFAQ--PMGSAMHDLCKMH  
CIDLHQEQIPEGI-----NLGYFE-YMGLGTVVDSLAAVKKLVFEKKL-SMDKLI--  
-----AAIDADFE-----G-Y-----

-----EDVRA-----  
-----LLRS--APCYGNDEYADAIGRDIDRISVEYG-NKYSMSDL-----  
--GIHNDVRYVPFTS-HVPFGKVVSATPNGRTDGFPLSD-GSSASHGADVNGPTAVLLSN  
CTTKNMG-LRDRA-----ARMLNIKFTPKCVEGEQG--TEKLVSFIRTFCD-  
-----LKLWHVQFNVVNKGTLVAAQKDPQKYRNLIVRIAGYSAYFVDLSPDLQNDLIARTE  
HDVM-----

>gi|206895494|ref|YP\_002247822.1| pyruvate-formate lyase [Coprothermobacter  
proteolyticus DSM 5265]

-----MTDSNNQPDADKTTLTIEEQIQRR  
EAVRPINERIA-----

-----RLR-----EES-VN-AQVK-ISTERARLV  
TEFYQSGVADNLSIP-----VQ---RAMAFKYLLEHCSLPVEEG-QLIVGLRGTG-PK  
EVPTYPEIC--AHSLEDLDI---LDTRENM--P-----  
--YHNTAEDKQLYE-STILPFW-----QGKTIREKLFQR---MPE-----  
-EWLQCY-----EAGIWTEFM---EQRAP-----

SupplementalMultipleSequenceAlign.txt

-----GHTAGG-ERIF--QKGILDIKKEIKRRMAQLDK-----SDSAYE---EKLEE  
LKAMDIAADALLIYAQRYAEKLEQLAQEE-TNVDRKAELHMASICRKVPAHAPETFWEA  
LQHYWFIHVGIYETNPWDS-FNPGRLDQHLRPFYEKEIS-E--GTLTREK-----AKEL  
LEAFWVKFNN-QPAVPKVGVTAEEESFTYNDFTKIN---IGGL-KV-DGS--DGTSVSYL  
LLEVLDEM-RTLQPNTAVLIS-NKTPDRLLRKALEVIG-PGFGEPLFNADGIIIVKMLRQ  
-----G---KTLEDARTAGVS-GCVE-----TGSFGK  
-ESY-----ILTYGFNL--PKILEITLNGV---DPITGK-KI-----GL-ETG  
DPI--TFQTYEELWDAYLKQIKYFMDIKMKGNDIIEELYATELPIV--PFMSLWIEDCVKR  
AKDYSN-----GGARY-----NTQYVQ-LVGLGTVTLSSLSSIKYHVFENHTF-TMEELL--  
-----KALTNDFE-----GPY-----  
-----EMMRQV-----  
-----ILTR--TPKFGEDNDFADSIKALVDETVWLI-ESY--PPTPVR----  
--KASRRAYWLPPTV-HVYFGKVMEASPDGRKAGMPVSE-GVSPVQGS DRKGIAAVFRS-  
-VSKCDW--DKTG-----GALLNQKLPDIVEDPET--LRKLGQLVRSFFN-  
----MGGHHVQFNVVSAELLREAQKRPAQDLQVLRVAGYSDFVNLPKGLQEEIIARTE  
HETV-----

>gi|46581228|ref|YP\_012036.1| formate acetyltransferase [Desulfovibrio vulgaris  
subsp. vulgaris str. Hildenborough]

-----  
-----  
-----  
-----  
-----  
-----  
-----  
-----  
-----MQCCNQLSPHEQRLQDKIEGKV  
DRYRATHERVF-----

-----TIL-----ESF--DNTRPR-IDVERAKYF  
TESMKAT-EGQ-PLP-----LR---WAKALMHIAENMTVYIDDH-QLICGRAGYQ-GR  
YGVLYPELD--GDFLGTAIED---LPNRAES--P-----  
---FAITPEDARVVV-EEIAPFW----KGKTYHEALNLA---LPA-----  
-DVHKLKLT-----YDDPQGLMSRFIVNET--SSFRSS-----  
-----IQWVHDYEVKL--KRGFRSIIKEEAEKIAALDPM-----SPCDNV---EKRPF  
LEAIVIVCDAILWAKRHAKLAAELAAKE-TDPTRKRELETMAEICAWVPENPARTFHEA  
VQAQWFTQVFSRIEQKTGTI-VSNGRMDQYFWPFYEKDLA-E--GRITEDS-----ALEL  
LECMWVGMAQ-YVDLYISPTGGAFNEGYAHWEAVT---IGGQ-TP-EGR--DATNDLTYL  
FLKSKREF-PLHYPDLAARIH-SRSPERYLWEVAETIK-DGSGFPKLIN-DEEVVPLYVS  
-----K---G---ATFAEALDYAVS-GCTE-----ARMPNR  
DTYT-----SGGAYINF--AAALEMVLVYNGK---MLKYGDTDL-----GA-HTG  
DPC--EFKTWEEFWNAYVTQHHLFLKTAQVQHHIINNLRARHFAQ--PMGSSLHDLCMKH  
CLDLHTPQIPEGI-----NLGYFE-YMGFGTVVDSL SAIKKLVFEDKKL-TMGELI--  
-----EALKCNFE-----G-K-----  
-----EDIQQ-----  
-----LLKS--APCYGNDDYADSIARDIDALSVKYG-RRYS-PEL-----  
--GMHNDVRYVPFTS-HVPFGRVVSATPNRKAWSALSD-GSSASHGADVNGPTAILQSN  
FNSKNYG-MRDRA-----ARMLNIKFTPKCVEGEEG--SQKLVSFIRTFCD-  
----LKLWHVQFNVINKETLLAAQRDPEKYRNLIVRIAGYSAYFVDLSPDLQNDLIARTG  
HDVM-----

>gi|153955616|ref|YP\_001396381.1| glycy radical activating protein [Clostridium  
kluyveri DSM 555]

-----  
-----  
-----  
-----  
-----  
-----  
-----  
-----  
-----MITERIE-----  
-----  
-----SLR-----QNY-IN-AKPV-ISYQRARIW  
TESHKKT-EGE-SIP-----IR---RAKAFRDTCQQIDVTIFDG-ELIVGAIGEF-RK  
CGILTPEFS--WNWVDREMDN---FDKRVQD--P-----  
---YVMTDEQRAFVR-KNIFPYW----KGKSL EEAFLAQ---LPK-----  
-ETTKVA-----VDTGFVDNDS--KWRQAV-----  
-----GEITPDYQDVLV-F-KKGFGGIIRQAKENISKLFL-----TSAEDM---KKKDF

SupplementalMultipleSequenceAlign.txt

YNSIIITSQGIITLANRYSEKAREMADAE-NDGVRKGGELLKIAEICSSIPEKAPSTFYEA  
IQFVWFTQVGGIISENPLA--LNIGRFDQFMYPYKSDMD-K--GIMTKDQ-----IQEL  
IELLWIKLSE-WWWT-ISANTAEFFAGYNQFQNLT---VGGK-TR-EGK--DATNDLSYM  
CLKATERV-KTHQPGLSVRIH-QDCPGSFLDAVTYLVS-KGTGFPAIHN-DAAGYQMLIN  
-----A-----G---YEPEDARDWNNC-GCVV-----PHFRKT  
-GEW-----TSAVNINF--TAALEFALNRGK---SRITGE-KI-----GL-DEK  
NPM--NFKSYEEVEKAFYKQFDNLIHESIIATLLAQKLHKEMVPR--PFLSSCIEECMIK  
GRDLVD---TGAKY-----NIGPVLTGIGLAVTSNSLAVIKKLVFEDKVT-TMENLI--  
-----KVLNANWE-----G-Y-----  
-----EELRQ-----  
-----LAIA--VPKYGNDIDYVDDIAIKMANHYYKEG-HRY--KDI--N----  
--GNNFITAFMGISN-YLPAGKVIGATSCGRKAREPLSE-GVSPFAGSDTSTPLAAMRS-  
-AAKINQ-DVHSG-----GTLLNLRNEDLVSTKRG--QSNLGAMIQSFFS-  
----LGAFHVQFNTISTETLRKAQNNPENYKDLLVRVAGYSTQFVNL SRAMQDAIIARTA  
HENY-----

>gi|150007435|ref|YP\_001302178.1| formate C-acetyltransferase [Parabacteroides  
distasonis ATCC 8503]

-----  
-----  
-----  
-----  
-----MNTTHHTHSCVHDTVSSVG  
ANNFGMNDRIK-----  
-----  
-----RLR-----RQT-FE-AQPS-LSIERALIE  
TRFYREN-YGKYPIP-----IL---RALNFLEICKQKTIYIGED-ELIVGERGPR-PK  
AVPTFPELT---CHSVEDLHI---LNTRELQ--R-----  
---YTISQEDIDTYE-REVIPYW----KGRTQRERIFSH---VPK-----  
-EWKEAY-----EVMFTEFM---EQRAP-----  
---GHTALD-GKVV--QYGLLDLKKRIEGEL SALDFM-----NDPEAT---DKQEE  
LTAMSISCDAAILL AERHADLADEMSLTE-KDPRRAAELRKIAEVCRWVPAHAPRTYWEA  
IQMYWVHGLGTITELNGWDA-MNPGHFDQHLAPFYEKEIA-A--GTLTRDE-----AKEL  
MSCFFIKVNN-HTAPPKVGITAKESGTYNDFTNLN---IGGI-RA-DGS--DGVSEVSYI  
MLETIEEL-HILQPGSAIHVS-ARTPERFLRAGCKVIR-QGHGYPVFN-PDVYVQELMR  
-----Q-----G---KSLRDAREGGCS-GCIE-----VGAFGK  
-EAY-----VLTGYLNV--PKILEVTLHNGV---DPVSGR-KV-----GL-ETG  
DPR--GFRTYEELYAAFMRQIHVFVDMKVRVSNYIDRMFAKYAPA--TFLSLFIDDCIAK  
GKDYYN---CGPRY-----NTTYIQ-CTGLGITDLSALRKHVFEKTF-TMEALL--  
-----DAMADNFE-----G-H-----  
-----EPMRQM-----  
-----ILNR--TPFFGNDPYADQIAVRVFDLLYDAI-EGK--PNT--K----  
--GECFHLNMLSTTC-HVYFGKVMGATPNGRLAGRAISD-GTSPSHGADTHGPSAVVKS-  
-LGKLDQ--VKSG-----GTLLNQRFLPSLLRREED--ISKLASLIRSYFA-  
----LGGHHIQFNIIVDTETLYAAQKCPEDYRDLVVRVAGYSDFNDMNADLQADVIARTE  
QETF-----

>gi|153952960|ref|YP\_001393725.1| glycy] radical activating protein [Clostridium  
kluyveri DSM 555]

-----  
-----  
-----  
-----  
-----MTNSTLE  
QTKRGSTERIR-----  
-----  
-----RLR-----EIS-DKKCKPS-ISMERAVLL  
TEAYKMY-EGKFSIP-----VL---RGLAFKYIMENRTLYIEKG-AIIIGEKGHK-PW  
AAPTFFPELC---CHTLKDFDN---MNNREKV--F-----  
---FKVSEEDKRIQK-EVIIIPYW---KDRALMTRMNKL---LPD-----  
-EWHKLF-----DAGLYTEFL---MQRGP-----  
-----GHTVAD-GKIY--RKGYIDFINDIQYEIDHLDYN-----NDVLAL---NKKEE  
LEGMKLVCEGMIIIFGERYADQARALASVE-NDPQWKEELLELAEVCDVVPKHAPRTFRQA



SupplementalMultipleSequenceAlign.txt

MSCFFIKVNN-QTAPPKVGITAKESGTYNDFTNLN---IGGI-KR-DGS--NGVSEVSYI  
MLETVDDL-HLLQPGSALHIS-VCTPERFLREGCKVIR-KGYGYPSVFN-PDTYVMELMR  
-----Q-----G---KTPEDAREGGCS-GCIE-----VGAFGK  
-EAY-----ILTGYLNV--PKILEVTLHNGT---DPVSGK-KV-----GL-VTG  
DPC--TFRSYEALYDAFLKQIHVFVDMKVRVSNYIDRMFAKYAPA--TFLSLFIDDCIAK  
GKDYYN----CGPRY-----NTSYIQ-CTGLGTITDLSVLKHKHVFEEKF-NMEQII--  
-----HATDTNFE-----G-Q-----  
-----EAMRQF-----  
-----ILNR--TPFFGNDDEYADRIAIQIFNDLYDAI-EGK--PNT--K----  
--GECFHLNMLSTTC-HVYFGKMMNATPNRLAGRAISD-GTSPSHGADTHGPSAVIKS-  
-LGKLDQ--VKSG-----GTLNQRFLPSLLKHDED--IAKLASLIRSYFA-  
----LGGHHIQFNIVDTATLHAAQKHPEEYRDLLVRVAGYSDFNDMNTDLQYDVIARTA  
QETF-----

>gi|78358079|ref|YP\_389528.1| formate C-acetyltransferase [Desulfovibrio  
desulfuricans subsp. desulfuricans str. G20]

-----MNAVTHSYHDDTGRRQ  
AAGLPLSARLR-----  
-----RLK-----AAY-LE-AKPS-ITIGRAMAY  
TEIEKAY-PDL-PPV-----LR---RAMGFRRACETAPVLIQDD-ELIVGHPCGA-PR  
AGAFSPDTA--WKWLRDELDT---IGTRPQD--P-----  
---YMISEADKKIMR-EELFPFW-----EGRSLDEVCEDA---FRR-----  
-EGLWEF-----CAEAGISDLSY--HHTSGG-----  
-----GDTSPGYDIILF-TKGINGLKAEAEHLERLDA-----ENAGDS---SGADF  
YRAAVIICEGVLLYAGRVAAHARQLAAAE-QNPARREELLAIAEVNTRVPANPPATFHEA  
LQAVWTIQSLFLLLENQCS--TSLGRFDQYVYPCYEAGIR-N--GTLTREQ-----AFEL  
TGCFIIKCE-MIWY-TPGATARYFAGYMPFINMC--VGGQ-KR-EGG--DATNDLTL  
LMDAVRSV-GVYQPSLACRIH-NQSPQEYLEKIADVVR-AGTGMPACHF-DDAHIRMMLR  
-----K-----G---FDFDDARDYCLM-GCVE-----PQKSGR  
IHQW-----TAGGFTQW--PVAVELVFNRGV---LRSYGR-RV-----AP-DTG  
DPA--GFTSYAQFEAAVKTLQDYIMEMTARGTVINQKLVRLMPT--PYMSLFVDGCMQT  
GKDVRTA---GGAVL-----YEGPGTIFAGLGTYADSMAAVRRLVFDEARY-TMAEMK--  
-----QALAADWA-----G-F-----  
-----EQMRR-----  
-----DCRN--APKYGNDDEYADGIARDIIDYTEKTI-NGF--KTL-----  
--YARLIHGTLQSFS-NTPLGEMVGATPDGRAAGAPLSD-GMSPSQGADRKGPTAIKS-  
-VGRLNV-ESMSL-----GMAHNFKLVHGCLLETQEG--RAGLVSLKKTASV-  
----LGNQMQFNYYVDDSMRLRDAQRHPEQYRDLMVRVAGYSAFFVELCKEVQDEIISRTA  
LH-----

>gi|11499044|ref|NP\_070278.1| pyruvate formate-lyase 2 (pflD) [Archaeoglobus  
fulgidus DSM 4304]

-----MCMDRIE-----  
-----KLI-----KKV---SKPARLSVERCRLY  
TESMKQT-EGE-PMI-----IR---QAKALKHVLENIPIQILDS-ELIVGTMLPN-PP  
GAIIFPEGV--GLRIINELDS---LPNRETN--R-----  
---LMVDEEDAKVLR-EEIAPYW-----QRKTIEAFAPFL---MPD-----  
-IMQILY-----TGSVVFV--L--TEIAGI-----  
-----SHVAVNYPYLL--RRGFRWFLEESERRIRALEE-----SGVYEG---EKYSF  
YQAAKIVSEAVINYGLRYSKLAEEAESE--DGERREELLKIAEICRVPAEKPETFWEA  
VQFVWLVSALHQENYEQA--ISMGRIDQYLYPFFKDIG-E--GRINREL-----AFDI  
LANLWIKTNE-IVPA-FDSLLEQYFSGQATNQAVT---IGGC-DI-YGN--DATNELTYL

SupplementalMultipleSequenceAlign.txt

MLEVTDRL-RLRQPNVHVRIN-KGSPESFLKRLAEAIS-SGCNNLALFF-DDAAVKALKN  
-----A-----E---VDDRDALNYTTD-GCVE-----IAPFGN  
-SFT-S----SDAALINV--AKALEYALNEG---DLQFGY-EF-----GA-KTE  
KPK-----FLEDLLEKLREQVSHIVKLVVGRSNVLSYANAIEVKPT--PLLSLVCVEDCFEK  
GVDVSR----GGARY-----NFTGIQ-AVGIADVGDLSVAIEGAL--NAGY-SMDDIV--  
-----EACRKNFV-----G-Y-----

-----EKLHK-----  
-----LLLQ--SPKYGNDDDAADKYTKMVLEWYCEEV-NRH--RNF--R----  
--GGKFAAGCYPMTT-NVGFGFFTSALPSGRKSGEPLNP-GVSPSTGMDREGVTAVINS-  
-ASKLSY-ENLPN-----GASLTINLSSDVL-GEKG--DAVIEALIKSSME-  
----LGVMHVQFNILKEDLLRKAQEQEPEKYRWLLVRVAGWSAYFVELSRPVQEEVIRIS  
CRI-----

>gi|197118876|ref|YP\_002139303.1| pyruvate formate-lyase PFL [Geobacter bemidjensis Bem]

-----  
-----  
-----  
-----

-----MTGRTE-----

-----RLR-----QES-LD-AEAA-ISAERALLL  
TEFYREN-EGRWSIP-----VL----RAKSFYLLCEKKTIIYLGDG-ELVVGGERGPA-PK  
LVPTYPELT---CHSLKDLRI---LNSREKT--S-----  
--YRVDDACLKAYG-ETVIPYW----STRSLRDKIFRE---LPE-----  
-EWHEAY-----QSGIFT-EF--MEQRAP-----  
-----GHTVLD-DKIY--NKGLLDFKKEIADAIAALDFV-----SDPNAW---SKREE  
LKAMDISCDAVILFAERHAKLAESMAAAC-ADAVRKQELLKIAANCRWVPAHAPTDFFEA  
LQSYWFCHLAVITELNGWDA-FSPGHLDQHLYPFYRDGLA-A--GTLKKEE-----AREL  
LECFVVKFNN-HPSPPKVGVTAAESGTYTDFANIN---LGGL-LP-DGS--DGSNEVSHL  
LLDIIDEM-HLLQPSSNIQLS-RKSPDRFLKHTLRVVR-KGYGFPSIFN-ADSVVEEQLR  
-----Q-----G---KTLADARAGGCS-GCVE-----VGAFGK  
-EAY-----ILTYGFNL--VKMLELALHDGV---DPATGA-QL-----GP-ATG  
KTE--SFACFDDVFAAFTRQLAHFIDIKIRGNRLIEMIYAGLMPA--PFLSVLTDDCISR  
GVDYNA----GGARY-----NNSFIQ-GVGIGSITDLSAIKEHVFEKAV-SLPDLV--  
-----AKLDADFA-----

-----SDEPLRQR-----  
-----LWNR--TRKYGNDDDFADDLMRQVFEAFFQV-DGR--PNT--K----  
--GGVYRIEMLPTTC-HVYFGSVTGAMPDGRRRGAPLSE-GISPVQGADRQGP TAVIRS-  
-AGKMDH--IRSG-----GTLLNLKFSPTLLAGEGG--VDGLAALVRSYFR-  
----MDGHVQFNVDVETLKRAQADPRQYRDLIVRVAGYSDFCDLSEELQNEIARTE  
HTSL-----

>gi|78358095|ref|YP\_389544.1| formate C-acetyltransferase [Desulfovibrio desulfuricans subsp. desulfuricans str. G20]

-----  
-----  
-----  
-----

-----MKNVEK  
VQYNKYEDRSRGN-----

-----VMW-----DVL-NPLRYSQSMSMSRAQLL  
MESYKET-ESL-HFF-----RR---RGKAIRKILQEMPIRIDDH-QLLCGDFSAK-PM  
GPEFFPDLA--ATWIVDYIDN-YGVEGRKGF-----  
---FRWEDEEQMEIG-RSIGEYF-----RETGGKEKWIAF---LGD-----  
-EEAALE-----HKIGEAGSWIVNTVSEMFAEK-----  
-----AWNCPDLRLV--KRGVRLIADIDEQLEKFVM-----ITYEDY---RRHEF  
WLGLKEMLLGGIDYAHRYRDLATELAAKE-TDPVRKAELEEMARVCNRVPEHPAETFQEA  
LQSLVFGLLMVFYDTRTFG--MGYGRIDQIMYPQYKSDIA-S--GKIDDEY-----VVQL  
FECFRVKIMG-KRQF-WPDMVTPNLSSESHFHNCV---ICGV-DPKTGR--DATNELSFA  
FLEAAERV-RTTHPTISVRWH-TQIDPKFMKRALETVK-LGMGFPAFFN-DEPSIQYLLA

SupplementalMultipleSequenceAlign.txt

-----R-----G---YTMEEARNYALG-GCTL-----HTVPGK  
-TSS-----IWPLVTSY--GRILELTMNGW---DFISNS-QL-----GP-KTG  
DFT--QMTSYEEFVAAYKAMIEYWANVSTKSGRAAKLQHGDTPD--IMMSAFTDDCIGR  
GKVCSL----GGAEHA-----DSCMYIVPVAVQDVANELYVLKHGVFGENPICTPQEML--  
-----DAMRANWE-----G-H-----  
-----EELRA-----  
-----KCMS--MPKFGNDIPEVDQLLTDVYNWIKEIW-HAQ--PAT--D----  
--GGRYEVSPHSIGF-HGGTGAKTGCALPCGRKAGTSFSDGAVSPVQGTVDVNGPSAVIKS-  
-AGSIDQ-HDLY-----GVLFNMRFPSPNIRGEKG--TANLASLIKTYFSD  
----YKKGHIQFNVLNRDDLIAAKKEPEKYKDLMVRVAGYSAYWTDLPANIQDELIARTE  
HEL-----

>gi|224367544|ref|YP\_002601707.1| Pf1D1 [Desulfobacterium autotrophicum HRM2]

-----MASLTERIL-----

-----RLK-----EKS---RNAEVWIDPERAQII  
TDFYSEN-AGKYSIP-----VL---RARSFKNLMEKKELYLGDE-ELIVGERGRA-PK  
LIPTFPEIA---CHSIKDLKV---LNSQNRI--P-----  
---YNVSPKTIKIYE-KKVIPYW-----DGAALDRDMFNQ---LSD-----  
-EWQTIY-----NCGLITETM---EQRAP-----  
-----GSMALD-ERMF--GMGLKKAKQEIEEAIKNLDFL-----NDFEAI---DKREQ  
LTAMAITCDGMMIYAKRYADMLEKKSSEE-TNKKRKKKEFEKMADVCRNVPANKPRDLWEV  
LQMSWFMHIGVITESNGWDA-CNPGHVDRHFFPYKKSLE-T--GQLDEES-----AKEL  
LCAWWIKYNN-HPAPAKYGVSALESPTYNDFVNIS---LGGI-TT-DGK--DAVNDLSYI  
FLEILDEI-EFIQPQVHVLLS-RMNPEHFLKEACKVIR-KGRGFPAMFN-AEAVIEQQLR  
-----V-----G---KTISDARGGGIC-GCVE-----TTCYGK  
-EAA-----PLIGYINI--AKILELTLQNGF---DTRTKK-QV-----GP-KTG  
NVK--DFNSYEELMEAFKKQARYIIDTKLVGSQYLIQMFAYKVPQ--PFLSVLIEGCVES  
GKDYND---GGPKY-----NVSILP-GVGIGTVTDSL SAIKKHVFEDESTY-SMGEVI--  
-----EALNADWQ-----  
-----KSEEMRLT-----  
-----FANK--TPRYGNDNDYADSIMREVSDFIDTV-DGI--KDS--R----  
--GGTYRMNMLPTTC-HMYFGEVGTGATCDGRRAGKPLSE-GISPVQADLCGPTASLKS-  
-AAKMDH-SRTC-----GTLNMMKFLPDVLKGDIG--IHKLASLIRTYFT-  
----YGGHHIQFNVCDAKTLQLAQKTPEDYNLIVRVAGYSDFNAIGKDLQDEIIQRYA  
HEA-----

>gi|51244468|ref|YP\_064352.1| formate C-acetyltransferase [Desulfotalea psychrophila Lsv54]

-----MNSRIE-----

-----RLR-----QKSF---STQASISIERALLE  
TEFYKEN-SGKYPLP-----IL---RALCFQHLQHKTLYIGDD-ELIVGERGPS-PK  
AVPTFPELT---CHSAEDLHI---LNDRPMT--N-----  
---YRLSDEDINRYE-EEVIPYW---QGRSMRDRIKFN---APE-----  
-EWRQAY-----QAGLFT-EF--MEQRAP-----  
-----GHTALD-GTIY--REGMLDFKARIAGRIARLDFL-----TDPRAA---DQREE  
LQAMDISCNAAIIFAKRHAELAERMADKE--EGERRQELLEIARICRWVPAHAPRTMHEA  
IQMYWVHGLGTITELNGWDA-MTPGHLDHHLHPFYENDLA-S--GILNREG-----AKEL  
MACLWIKINN-HTAPPKVGVTAKESPTYNDFQIN---LGGI-QR-NGQ--DGSNEISYI  
ALEVSDDEL-HLLQPQPSIHL-SQSPTRL LASACEVVR-KGYGYPSSFFN-ADGVVTQLVR  
-----A-----G---KLEDAREGGTS-GCIE-----TGAFGK  
-EAY-----ILTYGLNV--PKILEITLHNGI---DPLSGI-RV-----GL-ETG



SupplementalMultipleSequenceAlign.txt

EAS--FFQTFSAlykafeqLNIQLKVRMNNYIERMYGKYSpa--PFLSVVIHDCIEK  
GRDYYD---AGPRY---NSNYIQ-CCGIGTVTDSLALKTHVFEGEL--SMEKMV--  
-----KTLASNFQ-----G-E-----  
-----EELRAD-----  
-----LLNN--TPFYGNDDLADDIMQRVYHSLFQGI-DGQ--KNT--K----  
--GGEYHLNMLSTTC-HVYFGKMLGASANGRLAGLPTSD-GTSPSQGADLQGPTAVIKS-  
-LGKMDQ--YKSG-----GTLNQRFLPAALKDESD--LKNLGHILIRTYFS-  
----LGGHHIQFNVVDSKTLKKAQHPDQYKNLLVRVAGYSDFVDLDRHQEEIISRTG  
HGA-----

>gi|158520923|ref|YP\_001528793.1| formate C-acetyltransferase [Desulfococcus  
oleovorans Hxd3]

-----MEDRIS-----  
-----RLK-----KVV--QEAVPG-VCPERALLW  
TAYFKNRANRQKQVA-----VQ----IAGAVSHVLKNKSIYIYPD-EILAGNYTSR-RV  
GGIIPESH--GISVLMEIFK--FHKRRLN--P-----  
---LETTPAHRWKLf--ATIPFW----LNRNIIRKAFPT---IRQ-----  
-QLTFAV-----GQLTAREYQIYETGGI-----  
---SHLTPNHEKIL--AIGLEGFLKEIEAHEQAATAP-----EQRDF  
YQAARIAAGGLIAFAERYADLARKMAKNE-ADPVRKADLERIADACKRVPRHGANTFFEA  
VQAMLLTHISLFQESLGES--LCVGRMDQILWPYYQKDLs-E--GRLTRDQ-----AKEI  
LGAFCVKLSE-TVPA-YPEILAKTLGGLTSYQVVT---TGGM-DK-NGE--DATNELSYI  
LLELMDEL-RMRQPNshvRIH-KNTPKAFYDKVVEVTT-GKGSAPALYN-DETIATMQK  
-----A-----G---YTLADARNYVAI-GCVE-----PTSQGK  
TLGS-----TDAAIINM--PLALELALNEGR-----RFGARRRT-----GA-KTM  
AVL--QMRTMADVTDAYRTQLRHQLGRLKNDLQAIEKAHAAFHPT--PLTSMLIDGCLEK  
GKCSTS-----GGAVY-----NFSGIQ-GVGVSTVGDSLyaVEKMFEDRAM-GLAELV--  
-----DHLKSGLS-----N-----  
-----EAVRT-----  
-----RLRR--LEKFGNDHAEADRWTRFVMDYADAMAEMG--QTT--R----  
--GGRYNAGLYSNTT-HIHfanFVGALPNGRRQGEpFAS-GIAPENGMDRRGPTALVNS-  
-MNRLDF-TRMAN-----GINFNiKFNALNMKDDAG--KNALGSIFRVYFD-  
----RGGMQVQANMLDPEMLMAARDNPSLHPHLLVRVSGYSAYFNDLSPEMKDEIIARSF  
VAA-----

>gi|50122690|ref|YP\_051857.1| putative formate acetyltransferase [Pectobacterium  
atrosepticum SCRI1043]

-----MDND-----TLAP  
DTNHFSF-----GNSIVNTEKMARRD-----  
-----SSKSSADEKV  
AKQEMLTPRMQ-----  
-----RLR-----AHY-LE-ARPS-ISIYRALAF  
TEVAKNN-PGL-PSI-----LL---RAKSFRRACETAPILIQDE-ELIVGHPCGK-PR  
AGAFSPDIA--WRWVRDELDT---MSTRPQD--P-----  
---FQISEEDKKTIR-EEIAPFW----QGRSLDEVCEAQ---YRE-----  
-AGLWEF-----SGETFVSDLSY--HQINGG-----  
-----GDTCPGYDVLLF-TKGMKGIKADAQAKLAELGM-----EDPAHI---DRIYF  
YKAAIETCDGVMAYASRIA AHAREQAAQE-NDALRRAELLLIADVnENVpanppKTLQEA  
LQSIWTLLESFIEEENQTG--ISLGRVDQYCYPMYEADIQ-S--GRLTREQ-----ALEL  
LQMFIKCAE-LMWM--SSESGAKYFAGYQPFINLT---VGGQ-KR-SGG--DACNDLTYL  
IMDAVRfV-KVYQPSLACRIH-NQSPHEymeKIVDVVK-SGMGFpACHF-DDSHIKMMLR  
---IYQ-W---TSTGYTQW--PIAIEFALNRGR---MILFDR-VQ-----GV-DTG  
ELS--SLDTFEAFDRAVKTQIAHIIRLSAIGTVISQRVHRDIAPK--PLMSLLVEGCMek

SupplementalMultipleSequenceAlign.txt

GQDVAA----GGALI-----NHGPGLIFSGLATYVDSMMAIRKLVYEDRKY-TLEQMR--  
-----DALLANFS-----G-Y-----  
-----EMLHR-----  
-----ECLN--APKFGNDDNAVDPLARDITEWTEREC-RQY--KML--Y----  
---STFSHGTLISISN-NTPIGALTAASANGRLAWAPLSD-GISPTQGADKKGPTASIKS-  
-VSKMNV-ESMNI-----GMVHNFKFLKGLDTPPEG--RNLITLLRTSSI-  
----LGNGQMFSYVDDEVLRKAQQAPEKYRDLIVRVAGYSAYFVELCKEVQDEIISRTM  
IEKF-----

>gi|218780422|ref|YP\_002431740.1| Formate C-acetyltransferase [Desulfatibacillum  
alkenivorans AK-01]

-----  
-----  
-----  
-----MPLSTNEKQARPASPG  
LFLVKKKDRVT-----  
-----  
-----RLK-----EAV-QA-ATPG-ICTERALLW  
TEYFKDKANQSKHVV-----VQ---MAEALAHSQKNRSIAVHPG-ELIVGNYTSR-RV  
GGLLFPELH--GLVVMQDLFK---FPNRETN--P-----  
---LEVSRLDQARLL-S-IAPFW-----ATRMLAVKTCDS---WLD-----  
-TFSLVL-----NQLMGNYIINEAAGI-----  
-----SHIAPDYETLC--RLGTDGIAAKAACLK-----QSLMDA---DKWYF  
YESVRIAAEGLAALFGERYAQLAGEMAERE-LDEDLAAELKGIAEVCSRVPKGAKTFFREA  
LQSCFFAQIAINNESLDNS--VCPGRMDHYLYPYEKDLK-A--GLLTREE-----AKEL  
AGAFSVKMSE-IVPV-FSKYITRTHGGFFNGQIVN---VGGT-HK-NGK--DSTNELTMI  
FLEVMDEL-RMRQPNYTARVH-KNSPKKEYLDKVYGILS-KGANSPSIYN-DEVIVPVLKQ  
-----N-----G---VKIGDARNYTPV-GCVE-----PVAQGV  
-SFS-S----TDAALFNT--AIILELALNQQR---RLGRVAQI-----GA-KTK  
PVS--QMTCIEDVQEAFEIQMFHGINRLLKDLQAIEIANAAYHPT--PLSSMLLDGLEN  
GACSTR---GGARY-----NFSGIQ-CVGLVDAGDSLAAIKQAVFEDKKL-SMEELV--  
-----EHLKNNLS-----D-----  
-----DRWRH-----  
-----YLLN--MPKFGNDDPFADVWTAYALDVFKAAAL-DGK--TST--R----  
--GGKYTVGVYSVTL-HEYWGTVVSALPNGRRNGESLSN-GMSPSNGQDRKGPTAVLNS-  
-MNRIDY-SKTDN-----GINFNKFDANTVGSPAG--CTAMKSIFSTYFK-  
---RGGMQAQINVLDPKVLEARDNPEAYPHLLVRVSGYSAYFNDLTPAMKEEMIRRTS  
MGL-----

>gi|218779327|ref|YP\_002430645.1| Formate C-acetyltransferase [Desulfatibacillum  
alkenivorans AK-01]

-----  
-----  
-----  
-----MAIHSFNQ-----  
-----  
-----CYK-----DLI-LT-APYE-ICIERARYY  
TQSYRET-EGM-HPS-----LR---AAKALHLTSLNMSLNILQG-EQIIGNRSGK-TL  
GVVIVPVERGDVNAILEMELDF---LLNRSRQ--P-----  
---FSIDPDDRRELE-EDILPYW-----RGRTVRDRKKVL---WKENGLNFKPAVDPLSL  
YKRHKSL-----DLQKIKKAA--KVPGGDAAYALKGMKEILHNNPALVM  
NVFDVQGHILGKKNVL--SQGFSGIMAQAQEKGLAEA-----KEAGKA---DDAAF  
YESVMISCEAAKILAERLAKKAEAAEASEE-NDPDRQRELLAAAKRCRHSPWNPPRTFHEA  
VQAMWLI-LLGGLVSHGMVGILAVGRLDQYLYPYKDVES-S--GRIDQAM-----AVRL  
MEELLIKLGA-NLMI-LP--YVGKNTGNELGSDSCVPTIGGV-DA-QGK--DAVNPLTYA  
VLEAFANV-KSLGNSFTVRLS-QESPPEFWQKALETYR-ETSG-AALFN-DEIVTPALQN  
-----C-----G---MTLEDARDYGYI-GCVE-----PTGDGD  
-----AFGCTSGNDVSL--SAALEMALGDGY---LRVMGK-AI-----GP-KTG  
NPK--KFKTFDQVLEAFKKQVEFMVDTVARAVNLKDQIYMEEYHN--PYISCTLTGCLDN  
ARDMTQ-----GGAKY-----NFGSIS-GRGMGTAADSLAAIKCFVFDQKTF-SMAKIL--

SupplementalMultipleSequenceAlign.txt

-----KMLDCNFK-----G-Y-----  
-----DKERAM-----  
-----LAHR--APAFGSDDPYADDIAKEVCAFFCKTV-ASK--QTL--R-----  
--GGPFRPSFFSYGV-HVLEGLYIGATPNGRLAGTPVSN-SLSPTNGSEKQGPTGVLGS-  
-VAKLDH-SLISN-----GSSVNIKLMPSMFQGEER--LNKMIGLVKGFFA-  
----SGGMEVQPNVSNQTL LDAQKHPENYRDLVVRVSGYSAFFTDLGKPIQDEIIQRTE  
FEGL-----

>gi|147678771|ref|YP\_001212986.1| pyruvate-formate lyase [Pelotomaculum  
thermopropionicum SI]

-----MDKIIAEEI  
KKVNVMTPLRQ-----

-----RLK-----KEW-ED-AQPT-VYVDDTLLF  
TESWKET-EGL-PLD-----IR----WAKAFEKKMLECPIVIRDG-ELIVGSNTKF-IR  
GNSTLVAMKPREILAMCESGR---FDRKSSDISA-----  
---VNIDPEDLRKLLK-E-DAEYWVEHMPKYDAVNEAIRAE---LGD-----  
-DHFDLMFDHGMIYEGRAVRHHRDRGLFQNWG--AFGGG-----  
-----CMPTKPAI--DNGLNYIIALAKDELNRMEKLGAFVQGAASNAF---RKYNL  
LKAIISCNNAVIKFAERHAELARKQAESC-TDPVRKAELLKIAEVCQNV PANRPRNFWEA  
VQSLRFLHLAAWKESTERPE-VGVGRIDQILYPYKDDID-E--GTLTRQD-----AAEL  
LGALWLKIRE-TENL-VTIKREHRAAPGTL PNVT---LGGR-NE-LGE--DLINEVSWI  
VLEVMRQT-KLSEPAIYIRYH-DGIDEDFMIHALECNRDFGGGNPAFLN-DELGTQRYLA  
-----R-----G---VPLKDAVNWNAS-GCLG-----YHLDCG  
-E-----HQGGFFSLNHAKIFEITLYNGF--DPRTGK-QL-----GL-KTG  
DVT--KFTSLQQFIDAFYKQVDYFCERLRKHYFIWVCVEQEISPM SGLRAAMLYEDCIPA  
GLCSRE---GGARYPSLRSSWIGDR---GITDIADSLAAIQHLVFDTKQV-TMAELL--  
-----DAMRNNWE-----G-K-----

-----EELRQ-----  
-----MCLN--APKYGNDEDLPDNLFGELMFGTQRIM-QSR--PDP--I-----  
-TGEKPILFKGAAAG-HITQGASV GALPNGRFAYKPLNDAASSAMPGMDVNGPTAVINS-  
-ATKGNV-AFEYV-----GFTHNMKFSKQTLNTP EK--LKKLINILKTFFK-  
---RGGWHIQFNIHSVEEL LDAQKHPERYRNLVVRVGGYSAYFIDLPELQEEIVQRTM  
HEL-----

>gi|46580677|ref|YP\_011485.1| formate acetyltransferase, putative [Desulfovibrio  
vulgaris subsp. vulgaris str. Hildenborough]

-----MAALSSASNTEGQTPANKGYG  
INWDTAESRVK-----

-----ELK-----DFL-L--AAPQVMDPERLQCL  
LDVYDEF-QGE-PVV-----YI----RAKLLERVLLRKKIFL-DG-NPIVGTLTGV-RA  
GVYAYPEWN--VSWIKEEMQM---AKMASLG--E-----  
---MKIPQETQELLE-K-TYKLW----KGRTCIDLNNKM---FKE-----  
---KYGI-----NPAPFAKAG--MYE NV-----  
--SVASGSGIADYPLVL--NKGLRWLADDVRRARFEACP-----TTLANK---EKHDL  
YRAMLVTFEAVIAHSHRYAELA EKTA AEE-SDPKAKAELLEIAEICRRVPEYPARNFREA  
IQSFWFHILAIETE QMACA--TSPGRYGYMYPFYKDDIE-E--GNLTREQ-----VLTL  
LKFWIKHLE-LGEY-QGASYAMT LSGHT-GQSIT---IGGV-DA-NGD--DASTELEE V  
LLDTQIQM-KNIQPTLTL LYH-PKLKDSYMKKVV ECIR-GGSGQPQILN-NNVVIQRNLA  
-----RFAQYEGG---ITLEDARNCGNV-GCVS-----TGICGK  
-GSF-I---TQEDQPCL--AKVVELMLNNGK---CPVTCK-QV-----GV-ESG  
DPT--TFTT FEEVYEATKKQLDHLFNISRKHS DLSQMARLQVVPS--VFRSAMYDGCIDK  
GMCEEA---GGTRYP---QVNPI M-TAGI-DAANSLLAIRYL VFETKQV-TMEKLL--  
-----EALKANFE-----G-Y-----

SupplementalMultipleSequenceAlign.txt

-----EDIRK-----  
-----MCFE--APKHGNDYPEVEHFVQRFYRDVDIAHSAQG--PDC--F----  
--GYRTPLDAYSLSY-HNYFGSLMGALPNGRKAGVALTDGSVSAMPGTDHEGITALIKS-  
-GAEAID-TVRYG-----ANHFNVKFNPSVIEGPAG--ARTLVSLIKTYCD-  
----FGGSHIQFNCVSSDTLKDAQCKPQEYADLVVRVAGFSAYFTRLDKGVQNEIIK RTE  
YKN-----

>gi|120602027|ref|YP\_966427.1| formate C-acetyltransferase [Desulfovibrio vulgaris  
subsp. vulgaris DP4]

-----MAALSSASNTEGQTPANKGYG  
INWDTAESRVK-----

-----ELK-----DFL-L--AAPQVMDPERLQCL  
LDVYDEF-QGE-PVV-----YI----RAKLLERVLLRKKIFL-DG-NPIVGTLTGV-RA  
GVYAYPEWN--VSWIKEEMQM--AKMASLG--E-----  
---MKIPQETQELLE-K-TYKLW----KGRTCIDLNNKM---FKD-----  
---KYGI-----NPAPFAKAG--MYYENV-----  
--SVASGSGIADYPLAL--NKGLRWLADDVRARFEACP-----TTLANK---EKHDL  
YRAMLVITIEAVIAHSHRYAELA EKTA ADE-SNPKAKAELLEIAEICRRVPEYPARNFREA  
IQSFWFTHLAIETE QMACA--TSPGRYGQYMYPFYK KDIE-E--GNLTREQ-----VLTL  
LKFQWIKHLE-LGEY-QGASYAMT LSGHT-GQSIT---IGGV-DA-NGD--DASTELEEL  
LLDTQIQM-KNIQPTLTL LYH-PKLKDSYMKKVV ECIR-GGSGQPQILN-NNVVIQRTLA  
-----RFAQYEGG---ITLEDARNCGNY-GCVS-----TGVCCK  
-GSF-I----TQEDQPCL--AKVVELMLNNGK---CPVTCK-QV-----GV-ESG  
DPT--TFTTFEEVYEATKKQLDHLFNISRKHS DLSQMARLQV VPS--VFRSVMYDGCIDK  
GMCEEA----GGTRYP----QVNPIM-TAGV-DAANSL LAIRYLVFETKQV-TMEKLL--  
-----EALKANFE-----G-Y-----

-----EDIRK-----  
-----MCFE--APKHGNDYPEVEHFVQRFYRDVDIAHSAQG--PDC--F----  
--GYRTPLDAYSLSY-HNYFGSLMGALPNGRKAGVALTDGSVSAMPGTDHEGITALIKS-  
-GAEAID-TVRYG-----ANHFNVKFNPSVIEGPAG--ARTLVSLIKTYCD-  
----FGGSHIQFNCVSSDTLKDAQCKPQEYADLVVRVAGFSAYFTRLDKGVQNEIIK RTE  
YKN-----

>gi|218782693|ref|YP\_002434011.1| Formate C-acetyltransferase [Desulfatibacillum  
alkenivorans AK-01]

-----MGKTASPNSAIQEANPYLENP  
CLFPQASDRIL-----

-----AIK-----AEL-M--AEPYSICLERPSLL  
FEFWESK-NGKAAKN-----LHPAEARALMLAHIMRRRRPRIYNH-ELIIGNMSSK-RI  
GANFYPEGG--SLNILEDLLH---LENRQI---P-----  
---FKLAPMEKAELL-RLGLKSIPVSI GGKALLKPGRFSH---FLD-----F  
FRAKRYF-----V--TEEAGI-----  
-----SHQAGNYGEVV--SHGLVKADLYARDRLKADALED-----GTRLNA---DQRAF  
YKSVRTIILGIRNMA SNLAAEA EKKA A A QGVALERRKELLEAAEACLHAPYYPARTFKEG  
LQACWL VHMAMNLED FEQG--LSFGRLDRILLPLYKADLK-K--GLLTYEK-----AVEI  
MASFQLKTCE-TIPI-YSERIDQYFSGNGVAQGIT---VGGV-NG-GGR--DCTNELSGL  
VLDAFSQI-KTREPALHVRVH-KKTPWFLEKAAAVAA-LGCGKPSFFG-DKAVIKALEN  
-----T-----G---MSKPHARDYAVI-GCVE-----MASQGR  
-TYN-S----SDAALFNL--PLCLELALNQG YRFGSRRIPALRF-----GA-PTP  
SVE--EMDAFDQV LRAFKTQVRDSVNEMVKVITMIEQAYRVHRTT--PVNSIITQGCLEC  
GKDVTW----GGAMY-----DLTSVQ--AAGLADAGDSL YALKR VVFDEKRM-SLKAFV--  
-----DILKSNWE-----G-Q-----

-----EKLRQE-----

SupplementalMultipleSequenceAlign.txt

-----ISQK--FPRYNGDKDADRMTQVAADAYTDAV-TAH--KNS--R----  
--GGQYIAGIYSMTC-HHGFGKATGALPNGRPAGYRLSN-GLSPVDGVDKKGPTAVLQS-  
-AASLDS-SQWGN-----CCALNIKFDGNQFKGTGK--AKILSGLITAYMN-  
-----MGGMQIQPNILDAETLREAKEDPSAHPGIVVRVAGYCAFYNDLQPMVQDEVISRTS  
HGAE-----

>gi|126697725|ref|YP\_001086622.1| 4-hydroxyphenylacetate decarboxylase, catalytic  
subunit [Clostridium difficile 630]

-----MSQSKEDKIRSILEAKNIKSNFQ-NKENLSEFNEK  
KASK----RAE-----

-----DLL-----DVY-YN-TLST-ADMEFPYWY  
NREYRKS-DGD-IPV-----VR----RAKALKAAFHMTPTNIIPG-EKIVMQKTRH-YR  
GSFPMWVS--ESFFVAQGEQ--MREEAKKLASNTADELTKFGSGGGNVTESFGNVVSI  
AGKFGMRKEEVPVLV-K-MAKEW-----VGKSVEDLGFHYEKMPD-----  
YDLKENL-----MSTLICMFDSGY--TLPQ-----

-----GREVINIFYPL--NYGLDGIEMAKECKKAVAGNASG---DGLIGM---DRLYF  
YEAVIQVIEGLQTWILNYAKHAKYLESIE-TDLEAKKEYSDLVEILEHIAHKQPRTFREA  
LQLTYTIHIASVNEDAISG--MSIGRFGQILYPWYEQDIE-K--GLITKEE-----VIEL  
LELYRIKITC-IDCFASAGVNGGVLG-NTFNTLS---IGGL-KE-DGS--TGANELEEL  
LLEASMRC-RTPQPSLTMLYD-EKLPEDFLMKAECTK-LGSGYPAWVN-NSNGTTFMMK  
-----QFADE--G---MTVEEARAFALG-GCLETSPGCWKQLTLNGKTYSIAGGAGQ  
-SAG-----SGVHFIAN--PKILELVLMMNGK---DYRMNI-QV-----FE-PHN  
K----PLDITYEEVIEVFKDYKQAINVLERANNIELDIWRKFDTS--IINSLKPDCLDK  
GQHIGN---MGYRY-----NATLNVETCGVTVMVNSFAALKKLVYDDKAF-TIEEMK--  
-----DAILNCFG-----FKDALEVGN-----

-----SMADQVKVDKTGKYDAIYK-----  
-----ACLD--APKYGNNDLYADNLIKNEYVWLSKVC-EEA--QSL--Y----  
--AKKMPYPCQISVST-HGPQGAATLATPDGRLSGTTYSDGSVSAYAGTDKNGVYALFES-  
-ATIWDQ-AVVQN-----SQMNLKLHPTTIKQOQG--TKKLLDLTRSILR-  
----KGGFHIQYNVVDSETLKDAQKNPDNYRQLMVRVAGFTQYWCELGKPIQDEVIARTE  
YEGV-----

>gi|56476471|ref|YP\_158060.1| alpha-subunit of benzylsuccinate synthase [Aromatoleum  
aromaticum EbN1]

-----MTGAQTMKEYKGVLFQTPENPAEADIPADELHE  
HLQNPSTERTR-----

-----RLK--ARCRWKHASAGEFCEKGVTAGIERMRL  
TESHWDT-RGK-PEP-----IR----RALGLKNILDKCTLVLQPD-EFIVGYHAED-PN  
MFPLYPELS--YMAVQDYLSK-----K-----  
---YSPQPAKEA----QEIVDYW-----KPFSLQARCEPY---FDP-----  
VDLRRGY-----QVSTIEGPV---FASGY-----

-----NSVIPPYETIL--EDGLLARIAEAENIEHARAEMEKFPWNAPTGLEWIDKIDN  
WEAMVIACKAVIAWARRHARLCKIVAERFETDPKRKAELLEIADICQRVPAEPARGLKDA  
MQAKWFTFLICHAIRYAS--GYAQKEDSLLWPYYKASVIDKTFQPMHKD-----AVEL  
IEMERLKVSE-HGAG-KSRAYREIFPGSNDLFILT---LGGT-NG-DGS--DACNDMTDA  
ILEAAKRI-RTTEPSIVFRYS-KKNRAKTLRWVFECIR-DGLGYPSIKN-DDLGIQQLLE  
MAKYSRNGN-----G---VTPEEAHYWVNV-LCMA-----PGVAGR  
RKAQ--KTRSEGGSAIFP--AKLLEITLSNGY---DWSYADMQM-----GP-ETG  
HAK--DFATFDQLWEAFRKYQYAIALAIRCKDVSRTMECRFLQM--PFVSALDDGCMEL  
GMDANA-----LSEQPNGWHNPITIVAGNSLVAIKKLIYDEKKY-TMEQLM--  
-----DALKANWE-----G-Y-----

-----EEMRR-----  
-----DFKN--APKWGNDDDAADTLISRFEIILGGEMMKN--INY--S-----



SupplementalMultipleSequenceAlign.txt

-ATVWDH-SRSQN-----SQMNLKIHPSAIKGI EG--SKKLLDLTRSYMR--  
----KGGYHIQYNVDSKVLKEAQVKPENYRDL MVRVAGFTQYWCEIGKPIQDEVISRTE  
YEGV-----

>gi|218779578|ref|YP\_002430896.1| Formate C-acetyltransferase [Desulfatibacillum  
alkenivorans AK-01]

-----  
-----  
-----  
-----  
-----  
-----  
-----MVAEPAQDQSVQLEDKQE  
WWWVAEKKRSK-----

-----RLDYLKRSIWKKGALGGNYAPGIKLDLECATLF  
TDMWKFWKYD--PIM-----MR----RAKAI AHVLDKKTIFITDH-AQLVGYFGSL-PN  
TIMWRVDGA---SMVNEEAYN---EPG-----  
---IMPEPENESLQKVAELNDYW-----AGQTAVDKVARI---LDP-----  
-EDAVKF-----LSGAIGWGA---PSSAY-----  
-----GYSKG DY EYL FAGRRGFEDIEEINAAIEKAEDKTVGV--PGPEILDIYDRLQN  
WDAMILVLEAGIRHAKRYARLARTMAENMETDEKRREELLKIAETCERVPARAPRNLQES  
LQYDHF IQIFARTEAHEGA--WPARPDYHGPYYDKDVNVD--KTLTKED-----ALDL  
VGEFMIRAYE-VGGF-APRWAREGLQGITGTWWT---LGGV-NK-DGS--DACNDLTVA  
FLQAARLV-RVSNPTFGFRWH-PKVKDEVLRECFECIR-HGLGYPSMRN-DPLLIQNAMH  
-----WH-----G---HPLEEARTVWHQ-ACMS-----PCPTTK  
HGVQPMR---MASATANC--AKMVEYALHNGY---DHVVGM-QM-----GP-ETG  
DAA--KFHDFEDLFQAWVKQMEWLTSLLVRTVNLGRYKDPEFFGR--PFLSGMSERSVES  
GLDVVSPVGDRGNCW-----VTAFTWVENIDSLAAVKKLVFDDKKY-TMEQLL--  
-----TALKANWD-----G-Y-----

-----EEMRLD-----  
-----FVNN--APKWGND DDYVDDIMLRCLRETARHS-RVM--KCP--S----  
--GNSWPILPENVS G-NIHYASIVGALPNGRRCGDALYDGGISPGPLDKKGPSAVLKS-  
-CGKIDH-VSDGR-----AFLLNQRLSPTQLAGEKG--YQLWKAYIRTWAD-  
----LGLDHVQFNMVSDETLRAAQKDPEKYSEVIVRVAGYSAHFVDISRKTQDNIIQRTV  
QGI-----

>gi|188589129|ref|YP\_001921253.1| 4-hydroxyphenylacetate decarboxylase, catalytic  
subunit [Clostridium botulinum E3 str. Alaska E43]

-----  
-----  
-----  
-----  
-----  
-----  
-----MNNKTKLADILA EKGLPINFQFGGEAPEEMTKR  
EINKEPTPRAK-----

-----RLR-----EIY-YD-TLST-ANTEFPYWY  
NRRWNEL-EGE-VDV-----VR----RAESLKCA YSHLTPNIIPG-EKLV MQKTNY-YR  
GSFPMPWLS--EGFFVAKED E---LYKEALNRGSASAGELSKFGTGGGNVTKSFGNVVSI  
AGKFGMRQEEIPVLV-K-LAKEW-----VDRSVDDLGHKYE QMVPD-----  
YEIKENI-----MKS LICMFDSGF--TLPQ-----  
-----GREVVNYYYPL--QYGF DGLIDMAVECKKKVAGNADG---DGLVGM---DRLYF  
YEAVKITLEGIQNWILNYEKHARDLALIE-KNQSQKEEYIEIADCLNWIAHKQPRTFREA  
LQLTYIIHIAVINEDAISG--LSPGRVGVLYPWFKQDIE-N--GRITEKE-----VLEL  
LELHRVKFTC-IDCFAS TGVVGGVLSG-NTFNNLT---LGGL-KK-DGS--SAANRLEYL  
IVEAGITC-ATPQPTLSCFYD-EKLPEDFLLKCI ECDK-TGSGYPAWMN-NRGAIEFMMN  
-----QYGDE--G---MTIEEARSVAIG-GCLETSPCTWKELTLNGEKFDIPGGAGQ  
-PTS-----VGVHFIAN--PKVLELVL TNGK---DYRTNL-QV-----YP-EHN  
R----KLET FEDVVNQFKEYYELTCDVLAKTNNIQHDIWRKKNMS--IVNSLLKPNCLDV  
GKHIGN----LGYRF-----NATYNVESC GTINTINSLASLKKLVYDDKKY-TLDEM R--  
-----EAILN NFG-----FKTAE EIGSY-----

-----SLADQEKAGISSKYDDIYG-----  
-----DCLL--APKYGNDDPYVDSILKDYEDWFC DVC-HNY--ESL--Y----  
--GKKMYACQISVST-HGAQGAATLATT DGRLAGTTYADGMSAYPGTDKNGPYALF TS-  
-ATVWDH-SKSQN-----SQMNLKIHPSAIKGI EG--SKKLLDLTRSYMR--









SupplementalMultipleSequenceAlign.txt

-----M  
ANFNVEGAQNV-----  
-----EIS-----KKL-PC-EKPLIVQLEIMERY  
TAVHKAC-AAL-PKE-----IR----EVECLKVLYPTLFRKITNQ-DLIAGRTDFL-PI  
GFGCVTSLGGVGHYCV-----FKKLRAF--Q-----  
---LQLDETERKRVD-A-LYDYW-----LDHDLKTQFNKE--VLTE-----  
-DTLGMF-----IDCEYPMIATARL-----  
---SGMMLDYPKLL--DKGIGGLRSDLQEKLK-----EQPDN-----NF  
YKAGIQCLDIFVDCASHLQQDAREQMASA--NMKRQKELERICQALENIKEKPGTFHEA  
MQLFWLFALLAGV-----INYGRLDDYLGPYLVADLK-S--GRLTDEE-----AYRY  
IHSLWTMIEN-----RRTTVNGRII-----VGGK-GR-KHP--KEADVFLHI  
AMKVAKNC-RYVEPQFTLRFD-KETSEEIWEALDALG-AGATYPTLYN-DDVNVPAVMY  
-----GMR-VDEKTAEQYVPF-GCTE-----FVIQGG  
-STG-----TPNICINL--LKLLTIYMNDGI--DPIDGKRKS-----GPVSLK  
KLE--EYQTFEEFYDGYKALLDYLDLSVKAQYHSYEVMNQHVSF--LFTSLLTDDCIAR  
GKALLD---GGVRY-----LGGTNETYGNINTSDSLWVIRDLVFNQKKY-TLRQLN--  
-----DAMLANFN-----G-Y-----  
-----EALRK-----  
-----DCLN--CDKYGNDLETADTMANDLYEFVAKGVRDRG--IAI-----  
--GMQYFLIVISNNQLNTEWGNRTAASPDGRLSCMYMNP-ANNPQGGANKSGPTAMLNS-  
-LAKFD--AKYHG-----GSVQNIKFSPSMF--NEN--RAVIKSLFKTYFA-  
---KGGCHLMVTVDKGVLEDAVEHPENYPDLIVRVSGFSAVFVDLSPNIQQELLSRVL  
YDK-----

>gi|53715663|ref|YP\_101655.1| putative pyruvate formate-lyase [Bacteroides fragilis YCH46]

-----MNERIN-----  
-----YLK-----TYI-----  
-----LDKRHHS-----QR----RTPSSIGLDKLNITIAQQGLSPV-----ER  
ATACF-----AALMNAELPV-----  
---ILPGEKIVFT-----RTLQVPDIY---TPE-----  
-EWNEIK-----NKYYIHEKG-----TV-----  
-----CNISPNYAYTI--QHGLEARKQEIRKRQENPSL-----NE-----KERVF  
LNSMYQCIISIQKLEKYEQYALLNNETE-----IAHTLHTIKTEGAQNFRQA  
LQLLRILHFSIWEAGNYHN---TLGRFDQYMPFYQRDLE-N--GTLTKEE-----AFDL  
LEEFFLVCNK-----DSDLYPGMQQGDN-GQSLV---LGGR-DP-EGK--YLFNDLSRM  
CLQASYEL-KLIDPKINIRVD-PKTPDEIFSLGSRLLTK-IGLGFQYSN-DDIIPGLIR  
-----K-----G---YSKEDAYNYVVA-ACWE-----FIIPNR  
-----AMDI--PNIDAVSLIGCV---DRCLEK-----LN-----  
-----TCDSYSSFYTLVEQEIQKEVNAICEKHRNLYII-----PS--PMMSLLMDGTIER  
AKDISE-----GSYY-----NNYGIH-GTGIATATDTLAALKKYYFEEQSL-DYTTLL--  
-----TAIRSNFK-----G-Y-----  
-----EELQKK-----  
-----LREE--APKMGQDNDYADLIAKDLLDSFDRSL-ADK--RNE--R----  
--GGLYRAGTGTAMY-YIFHSNQLRATPDGRNDGEMIPA-NYSPSLFLKQKGPISVIKS-  
-FTKQHL-DRVVN-----GGPLTLEFDQSVFSNDET--IEKLGMLVKTYIV-  
---LGGHQLQLNTVSRETLHARKHPEQHKNLIVRVWGSYFVELDECYQNHVINRIE  
FSL-----

>gi|60683602|ref|YP\_213746.1| putative formate acetyltransferase (pyruvate formate-lyase) [Bacteroides fragilis NCTC 9343]

SupplementalMultipleSequenceAlign.txt

-----  
-----  
-----  
-----  
-----MNERIN-----  
-----  
-----YLK-----TYI-----  
-----LDKRHHS-----QR-----RTPSSIGLDKLNITYAQQGLSPV-----ER  
ATACF-----AALMNAELPV-----  
-----ILPGEKIVFT-----RTLQVPDIY-----TPE-----  
-EWNEIK-----NKYYIHEKG-----TV-----  
-----CNISPNYAYTI--QHGLEARKQEIRKRQENPSL-----NE-----KERVF  
LNSMYQCIISIQLIEKYEYQALLNNETE-----IAHTLHTIKTEGAQNFRQA  
LQLLRILHFSIWEAGNYHN---TLGRFDQYMPFYQRDLE-N--GTLTKEE-----AFDL  
LEEFFLVCNK-----DSDLYPGMQQGDN-GQSLV---LGGR-DP-EGK--YLFNDLSRM  
CLQASYEL-KLIDPKINIRVD-PKTPDEIFSLGSRITK-IGLGFPQYSN-DDIIPGLIR  
-----K-----G---YSKEDAYNYVVA-ACWE-----FIIPNR  
-----AMDI--PNIDAVSLIGCV---DRCLEK-----LN-----  
-----TCSDYSSFYTLVEQEIQKEVNAICEKHRNLYII-----PS--PMMSLLMDGTIER  
AKDISE-----GSYY-----NNGYIH-GTGIATATDTLAALKKYYFEEQSL-DYTTLL--  
-----TAIRSNFK-----G-Y-----  
-----EELQKK-----  
-----LREE--APKMGQDNDYADLIAKDLLDSFDRSL-ADK--RNE--R-----  
--GGVYRAGTGTAMY-YIFHSNQLRATPDGRNDGEIIPA-NYSPSLFLKQKGPISVIKS-  
-FTKQHL-DRVVN-----GGPLTLEFDQSVFSNDET--IEKLGMLVKTYIV-  
----LGGHQLQLNTVSRETLHARKHPEQHKNLIVRVWWSGYFVELDECYQNHVINRIE  
FGL-----

>gi|52424456|ref|YP\_087593.1| Pf1D protein [Mannheimia succiniciproducens MBEL55E]

-----  
-----  
-----  
-----  
-----MAELTEAQKKAWEFVPGEW  
QNGVNLRFIQ-----  
-----  
-----KNY-----TPYEGDESFLADATPATSELW  
NSVMGKIKIENKTHA-----PL--DFDEHTPSTITSHKPGYINKDLEKIVGLQTDAPL  
KRAIMPYGG--IKMIKGSCEV---YG-----  
---RKLDPQVEFIPT-E-----YRKTHNQGVFDV---YTP-----  
-DILRCR-----KSGVLTGLP---DAYGR-----  
-----GRIIGDYRRLA--VYGIDYLMKDKKAQFDSLQ-----PRLEA  
GEDIQATI-----QLREEIAEQH---RALGKIKEMAASYGYDISGPATNAQEA  
IQWTFAYLAAVKSQNGAA--MSFGRTSTFLDIYIERDLK-R--GLITEQQ-----AQEL  
MDHLVMKLR--MVRFLRTPYDQLFSGDPMWATET---IAGM-GL-DGR--PLVTKNSFR  
VLHTLYTMGTSPEPNLTILWS-EQLPEAFKRFCAKVS--IDTSSVQYEN-DDLMRPFNN  
-----D-----DYAIA-CCVS-----PMVVGK  
-QMQ-----FFGARANL--AKTMLYAINGGI---DEKNGM-QV-----GP-KTA  
PITD-EVLNFDTVIERMDSFMDWLATQYVTALNIIHFMDKYAYE--AALMAFHDRDVF  
TMACGI-----AGLSVAADSLSAIK---YAKVKP-IRGDIKDK  
DGNVVA-----SNVAIDFE-----  
-----IEGE--YPQFGNNDPRVDDLAVDLVERFMKKV-QKH--KTY--R-----  
--NATPTQSILTITS-NVYVGKKTGNTPDGRRAGAPFGP-GANPMHGRDQKGAVALTS-  
-VAKLPF-AYAKD-----GISYTFIIVPNALGKDDEAQRNLAGLMDGYFHH  
EATVEGGQHLNVNVLNREMLLDAMENPEKYPQLTIRVSGYAVRFNSLTKEQQQDVITRTF  
TQSM-----

>gi|220933149|ref|YP\_002510057.1| formate acetyltransferase [Halothermothrix orenii H 168]



SupplementalMultipleSequenceAlign.txt

-----MFKQWDGFKNGTW  
QESIDVRNFIQ-----

-----KNY-----KLYEGDSTFLEDKTEKTSKVV  
ARAYELIVEEVKGGI-----ID---VANDRVSGIDNYEPGYIDKDNEVIVGLQTD-PL  
KRIVNPFGG--MRMVQSSLKE---YG-----  
---YELDKNIEEYFP-K-----YRKTHNEGVFDA---YTK-----  
-EIRAAR-----SAGLLTGLP---DAYGR-----  
-----GRIIGDYRRVA--LYGIDYLIEEKKRDLNLDNLG-----  
-----DMLDELVRKREEVSMQI-----RALGEVKSMASKYGIDISKPASNAREA  
AQHLYFGYLAGIKENNGAA--TSFGRTSTFLDIYIERDLE-A--GLITEKE-----AQEI  
VDQLIIKLR--LVRHLRTPEYNELFGGDPTWVTES---IGGV-GI-NGK--PLVTKNSFR  
YLHTLINLGTSAEPNLTVLWS-DKLPESFKKYCAEIS--IKTDSIQYEN-DEVMRPVYGD  
-----DYAIA-CCVS-----AMKVGK  
-QMQ-----FFGARANI--AKSLLYAINGGV---DELKGI-KV-----VP-GIE  
KLTDEEILD FNKVKSNYFKVLEYVAKVYVDTMNI IHFMHDKYAYE--AGQMALHDTAVER  
LMAFGI-----AGLSVAIDSLSAVK---YAKVKP-IRNE-----  
-----EGITVDFE-----

-----VEGD--FPKYGNDDDRADDLGVELVTKFSNEL-KKH--PLY--R-----  
--DAKHTLSALTITS-NVMYGKKTGTTDPGRKKGEPLAP-GANPMHGRDINGALASLNS-  
-VAKIPYNEICQD-----GVSNTFSIVPDALGKDENQKITNLVAILDGYFT-  
----QGAHHLNVNVLNRQTLIDAMENPKYPTLTIRVSGYAVNFSRLSKEQQLEVISRTF  
HESI-----

>gi|187933107|ref|YP\_001886762.1| formate acetyltransferase [Clostridium botulinum B str. Eklund 17B]

-----MFKQWEGFKNGTW  
QEGIDVRNFIQ-----

-----KNY-----NVYEGDSSFLEGISEKTSRW  
DKAYELIVEEVKGGI-----ID---IATDRVSGINNYEAGYIDKDNEVIVGLQTD-PL  
KRIVNPFGG--FRMVQTSLE---YG-----  
---YELDKDIEKHFS-R-----YRKTHNEGVFDG---YTK-----  
-EIRLAR-----TAGLLTGLP---DAYGR-----  
-----GRIIGDYRRVA--LYGIDYLIEEKKNDLDNLQ-----  
-----GDMLDELVRKREEVS-MQIRALGEIKEMAAKYGCDISKPASNAKEA  
VQALYFGYLAGIKENNGAA--TSFGRTSTFLDIYIERDLE-T--GLITEKE-----AQEL  
VDQLIIKLR--LVRHLRTPEYNLFGGDPTWVTES---IGGM-GI-NGK--SLVTKNSFR  
YLHTLINLGASAEPNLTVLWS-DKLPENFKKYCAEIS--IKTDAVQYES-DEVMRPIYGD  
-----DYAIA-CCVS-----AMKVGK  
-QMQ-----FFGARCNI--AKSLLYAINGGC---DELKGM-KV-----IP-GIE  
VMND-EVLDFNKVKENYFKVLEYVAKIYVDTMNI IHMHDKYAYE--AGQMALHDTMVDR  
LMAFGI-----AGLSVAIDSLSAIK---YAKVKP-IRNE-----  
-----EGLAIDFE-----

-----VQGD--FPKYGNDDDRADDLGVELVTKFSNEL-KRH--PLY--R-----  
--DAKHTLSALTITS-NVMYGKKTGTTDPGRKKGEPLAP-GANPMHGRDVNGALASLNS-  
-VAKIPYNEVCQD-----GVSNTFSIVPDALGKSEEQRISNLVSILDGYFV-  
----QGAHHLNVNVLNRETLIDAMENPKYPTLTIRVSGYAVNFSRLSKEQQLEVISRTF  
HESI-----

>gi|152977893|ref|YP\_001343522.1| formate acetyltransferase [Actinobacillus succinogenes 130Z]

SupplementalMultipleSequenceAlign.txt

QEGVNLRFDIQ-----  
-----  
-----KNY-----TPYEGDESFLADATPATELW  
NSVMGKIKIENKTHA-----PL--DFDEHTPSTITSHKPGYIDKDLEKIVGLQTDAPL  
KRAIMPFGG--IKMIKGCQV--YG-----  
---RTLDPKVEFIFT-E-----YRKTHNQGVFDV---YTP-----  
-DILRCR-----KSGVLTGLP---DAYGR-----  
-----GRIIGDYRRLA--VYGIDYLMKDKKAQFDSLQ-----PRLEA  
GEDIQATI-----QLREEIAEQH----RAGKIKEMAASYGYDISGPAMNAQEA  
IQWTFAYLAAVKSQNGAA--MSFGRTSTFLDIYIERDLK-R--GLITEQQ-----AQEL  
MDHLIMKLR--MVRFLRTPEYDQLFSGDPMWATET---IAGM-GL-DGR--PLVTKNSFR  
VLHTLYTMGTSPEPNLTILWS-EQLPEAFKRFCAKVS--IDTSSVQYEN-DDLMRPFNN  
-----D-----DYAIA-CCVS-----PMVVGK  
-QMQ-----FFGARANL--AKTMLYAINGGI--DEKNGM-QV-----GP-KTA  
PITD-EVLNFDTVIERMDSFMDWLATQYVTALNIIHFMHDKYAYE--AALMAFHDRDVFR  
TMACGI-----AGLSVAADSLSAIK---YAKVKP-IRGDIKDK  
DGNVVA----SNVAIDFE-----

-----IEGE--YPQFGNNDPRVDDLAVDLVERFMKKV-QTH--KTY--R----  
--NAVPTQSILTITS-NVVGKKTGNTPDGRRAGAPFGP-GANPMHGRDQKGAVALTS-  
-VAKLPF-AYAKD-----GISYTF SIVPNALGKDDDAQKRNLAGLLDGYFHH  
EATVEGGQHLNVNVLNRETLLDAIDHPEKYPQLTIRVSGYAVRFNSLTREQQQDVITRTF  
TQAM-----

>gi|188590176|ref|YP\_001921720.1| formate acetyltransferase [Clostridium botulinum  
E3 str. Alaska E43]

-----MFKQWEGFKNGTW  
QEGIDVRNFIQ-----

-----KNY-----KVYEGDSSFLEGISEKTSRVW  
DKAYALIVEEVKGGI-----ID---IATDRVSGINNYEAGYIDKDNEVVVGLQTDAPL  
KRIVNPFQGG--FRMVQTSLEK---YG-----  
---YELDKDIEKHFS-R-----YRKTHNEGVFDG---YTK-----  
-EIRLAR-----TAGLLTGLP---DAYGR-----  
-----GRIIGDYRVA--LYGIDYLIIEKKNDLDNL-----  
-----QGDMLDELVRKREEVS-MQIRALGEIKEMAAYKGCISKPASNAKEA  
VQALYFGYLAGIKENNGAA--TSFGRTSTFLDIYIERDLE-A--GLITEKE-----AQEL  
VDQLIIKLR--LVRHLRTPEYNDLFGGDPTWVTES---IGGM-GI-NGK--SLVTKNSFR  
YLHTLINLGASAEPNLTVLWS-DKL PENFKKYCAEIS--IKTDAVQYES-DEVMRPIYGD  
-----DYAIA-CCVS-----AMKVVGK  
-QMQ-----FFGARCNI--AKSLLYAINGGC---DELKGM-KV-----IP-GIE  
VMND-EVLDFNKVKENYFKVLEYVAKIYVDTMNIHMHDKYAYE--AGQMALHDTMVDR  
LMAFGI-----AGLSVAIDSLSAIK---YAKVKP-IRNE-----  
-----EGLAIDFE-----

-----VEGD--FPKYGNDDDRADDLGVELVTKFSNEL-KKH--PLY--R----  
--DAKHTLSALTITS-NVMYGKKTGTPDGRKKGEPLAP-GANPMHGRDANGALASLNS-  
-VAKIPYNEVCQD-----GVSNTFSIVPDALGKSEEQRISNLVSILDGYFV-  
---QGAHHLNVNVLNRETLDAMENPKYPTLTIRVSGYAVNFSRLSKEQQLEVISRTF  
HESI-----

>gi|22298533|ref|NP\_681780.1| formate acetyltransferase [Thermosynechococcus  
elongatus BP-1]

-----MNCTRYTTRYTELPEAAWQEFTGGDW  
VERIDVRDFIQ-----

SupplementalMultipleSequenceAlign.txt

-----RNY-----TPYTGDSFLVGASDRTQQLW  
AKVRDLMALEREKGV-----LD---ADTSLPSSITAHPPGYIDRELEQIVGLQTDK-PL  
KRAIMPFGG--IRVVETALKA---YG-----  
---YELDPRTKEIFT-K-----YRKTHNDGVFDA---YTP-----  
-EMRRCR-----KSGIITGLP---DAYGR-----  
-----GRIIGDYRRVP--LYGVDRLIADKQAQASLE-----  
-----VDVMDEETIRLREELSEI-----KALNELKDMAASYGFDISRPAANGKEA  
IQWLYFGYLAAVKEQNGAA--MSLGRVSTFLDIYFERDLR-H--GTATEAD-----IQEW  
IDHFVMKLR--MVRFLRTPEYNELFSGDPTWVTES---IGGM-GL-DGR--PLVTKTSFR  
ILNTLYTLGPAPEPNLTVLWS-ENLPEAFKRFCQAQVS--IDTSSIQYEN-DDLMRPYWG  
-----DYAIA-CCVS-----AMRVGK  
-QMQ-----FFGARVNL--AKALLYAINGGR---DEVSGQ-QV-----AP-MFA  
PITG-DTLKWEVLPFRFEQMMAWLAKVYVNTLNVIHYMHDKYCYE--RLEMALHDRDVF  
TMACGV-----AGLSVADALSAIK---YAEVKV-IRNA-----  
-----DGLAVDYE-----

-----IKGD--FPKYGNDDRVDSLAVVWVETFMNEV-RKH--KTY--R----  
--NAVPTQSILTITS-NVYVGKKTGSTPDGRKAGEPFAP-GANPMHGRDTKGAIASLAS-  
-VAKLPY-VHAQD-----GISNTFSIVPSALGKTREDQISNLVNMLDGYIH-  
----DQGFHINVNVLNREMLLDAMDHPPELQPLTIRVSGYAVNFIKLTREQLDVINRTF  
HERF-----

>gi|150015897|ref|YP\_001308151.1| formate acetyltransferase [Clostridium  
beijerinckii NCIMB 8052]

-----MFKQWEGFKNGTW  
QEDIDVRNFIQ-----

-----KNY-----KLYEGDGSFLEEKERTSKVW  
GKAYALIVEEVKKGKI-----ID---VATDRVSGIDNYDPGYIDRDNEVIVGLQTDK-PL  
KRIVNPFGG--MRMVQSSLKE---YG-----  
---YELDPEINKNFS-K-----YRKTHNEGVFDA---YTK-----  
-EIRAAR-----SAGLLTGLP---DAYGR-----  
-----GRIIGDYRRVA--LYGIDYLIIEKKKDLNNG-----  
-----DMLDELVRKREEVSMQI-----RALGEVKSMAAKYGIDISKPASNAKEA  
AQHLYFGYLAGIKENNGAA--TSFGRTSTFLDIYIERDLE-A--GLITEKE-----AQEI  
VDQLIIKLR--LVRHLRTPEYNELFGGDPTWVTES---IGGV-GI-NGK--PLVTKNSFR  
YLHTLINLGTSAEPNLTVLWS-DKLPEFVKYCAEIS--IKTDSIQYEN-DEVMRPVYGD  
-----DYAIA-CCVS-----AMKVGK  
-QMQ-----FFGARANI--AKSLLYAINGGV---DELKGI-KV-----VP-GIE  
KFTDEEILNFDKVKANYFKVLEYVAKVYVDTMNIHFMHDKYAYE--ASQMALHDTAVER  
LMAFGI-----AGLSVAIDSLSAIK---YAKVRP-IRNE-----  
-----EGITIDFE-----

-----VEGD--FPKYGNDDDRADDLGVELVTKFSGEL-KKH--PLY--R----  
--DAKHTLSALTITS-NVMYGKKTGTPDGRKKGEPLAP-GANPMHGRDINGALASLNS-  
-VAKIPYNEICQD-----GVSNTFSIVPDALGKNEDQKITNLVAILDGYFT-  
----QGAHHLNVNVLNRQTLIDAMENPKYPTLTIRVSGYAVNFSRLSKEQQLEVISRTF  
HESI-----

>gi|220929637|ref|YP\_002506546.1| formate acetyltransferase [Clostridium  
cellulolyticum H10]

-----MRLNISDFKPGKW  
QNSIDVQDFIQ-----



SupplementalMultipleSequenceAlign.txt

-----TNY-----TPYDGDGSFLCGASSKTRQLW  
ETCRSLLEVEHLNGG-----IL--DIDTETVASINSHKPGFIDEKEYEVIKGLQTD-PL  
KRAFLAKTG--YRMAKQACQ---FD-----  
---AAPSPEFDKIFS-K-----SIKTHNDGVFSA---YTN-----  
-EMRKAR-----RCGVITGLP---DTYGR-----  
-----GRIIGDYRRVA--LYGTDVLISQKQKDLDSL-----  
-----IGTMTDGVIRLREEIQDQI-----AALNDLAVLGGSYGFDMKRPALNAFEA  
VQWTYLAFLGALKETNGAA--NSLGRNLVFFDIFIQRDIN-N--GILTEED-----AQEL  
IDQFVIKLR--FIRHLRTKEYNELFAGDPVWLTES---LGGM-SS-DGR--HMVSKTSFR  
FLQTLKNLGAPEPNLTILWS-VKLPENFKKFCAEIS--IVTSAIQYEN-DDLMQPQYGD  
-----DYGIS-CCVS-----AMRLGK  
-DMQ-----FFGARCNI--AKLLLLSLNGGR---DEISGD-QV-----AP-EIK  
PYEG-EYLEYEVKVMKNFLELQDWTGLYVDTMNIHMHDKYAYE--RLMMALHDTDVNR  
LMAFGI-----SGLSVLVDSL SAIK---HTRVRV-VRDQ-----  
-----RGIITDFE-----

-----LEGS--YPQYGNDDRADCIAKEVVT SFYNSL-KAH--PTY--R----  
--NATHTLSILTITS-NVVYGKKTGSTPDGRKKGEPFAP-GANPMHNRDKSGILAMMNS-  
-VASIPY-NVCS-----GISLTL SVIPNALGKARETKISNLSALIDGYVM-  
---SSGHHINVNVLDKETLENAIKEPMKYNQLTVRVSGYAVHFVKLTKAQQLEVL SRTF  
HEAM-----

>gi|219854351|ref|YP\_002471473.1| hypothetical protein CKR\_1008 [Clostridium  
kluuyveri NBRC 12016]

-----MKRGAFMKKKWKNFNTGNW  
TENIDVRNFIQ-----

-----KNY-----TPYTGDESFLTSPTEKTKKVV  
KKSEELILEEIKKGG-----VL--DVDTNTVSGIDNFKPGYIDKENEVIVGLQTD-PL  
KRIVNPFGG--IKMAKDALTD---YG-----  
---YRIDENMNIIFT-K-----YRKTHNEGVFDS---YTE-----  
-EIRAAR-----HVGLITGLP---DAYGR-----  
-----GRIIGDFRVA--LYGIDYLIEEKKKDLKTL-----KSPDML-----  
-----EDIL-----RQREEVSEQI-----KALYKIKNMAASYGIDISNPAGNAKEA  
VQFTYLGYLAGIKENNGAA--MSLGRVSTFLDIYIERDLK-E--GALTEQE-----AQEL  
IDQFVIKLR--LERHLRTPDYNELFAGDPN WTEC---IGGM-SI-DGR--TLVTKNSYR  
FLNTLTNLGPAPEPNITILWS-QNLPEPFKKYCSRMS--IETDALQYEN-DDLMRPVYGD  
-----DYGIA-CCVS-----AMALGK  
-EMQ-----FFGARCNI--AKSLLYAINQGS---DEKTFE-KI-----VP-HIE  
KMED-EILNYEKVKKNYFKVLE YVAKLYVNALNTIHYMHDKYAYE--AGLMALHDTKVHR  
FLACGI-----AGLSVAADSL SAIK---YGVVTP-IRNQ-----  
-----KGTAVAFK-----

-----TEGD--FPKYGNDDDRVDDIAVEIVNKFISEL-RKT--ETY--R----  
--NAEHTLSVLTITS-NVMYGKKTGATPDGRKSGEPFAP-GANPMHGRDKEGALASLNS-  
-VAKIPYRSVCQD-----GVSNTFSIVPDALGKDLNTRTNNLASILDGYFS-  
---KGAHHLNVNVMHRETLLDAVENPEKYPTLTIRVSGYAVHFVKLTRQQQEEVIKRTF  
HQRV-----

>gi|153953732|ref|YP\_001394497.1| Pfl [Clostridium kluuyveri DSM 555]

-----MKKKKWKNFNTGNW  
TENIDVRNFIQ-----

-----KNY-----TPYTGDESFLTSPTEKTKKVV  
KKSEELILEEIKKGG-----VL--DVDTNTVSGIDNFKPGYIDKENEVIVGLQTD-PL

SupplementalMultipleSequenceAlign.txt

```

KRIVNPFGG--IKMAKDALTD---YG-----
---YRIDENMNNIFT-K-----YRKTHNEGVFDS---YTE-----
-EIRAAR-----HVGLITGLP---DAYGR-----
-----GRIIGDFRVA--LYGIDYLIEEKKKDLKTL-----KSPDML-----
-----EDILRQREEVSEQI---KALYKIKNMAASYGIDISNPAGNAKEA
VQFTYLGYLAIKENNGAA--MSLGRVSTFLDIYIERDLK-E--GALTEQE-----AQEL
IDQFVIKLR--LERHLRTPDYNELFAGDPNWVTEC---IGGM-SI-DGR--TLVTKNSYR
FLNTLTNLGPAPEPNITILWS-QNLPEPFKKYCSRMS--IETDALQYEN-DDLMRPVYGD
-----DYGIA-CCVS-----AMALGK
-EMQ-----FFGARCNI--AKSLLYAINQGS---DEKTFE-KI-----VP-HIE
KMED-EILNYEKVKKNYFKVLEEVAKLYVNALNTIHYMHDKYAYE--AGLMALHDTKVHR
FLACGI-----AGLSVAADSLSAIK---YGKVTP-IRNQ-----
-----KGTAVAFK-----

```

```

-----TEGD--FPKYGNDDRVDDIAVEIVNKFISEL-RKT--ETY--R----
--NAEHTLSVLTITS-NVMYGKKTGATPDGRKSGEPFAP-GANPMHGRDKEGALASLNS-
-VAKIPYRSVCQD-----GVSNTFSIVPDALGKDLNTRTNNLASILDGYFS-
---KGAHHLNVNVMHRETLLDAVENPEKYPTLTIRVSGYAVHFIKLTRQQQEEVIKRTF
HQRV-----

```

>gi|150009973|ref|YP\_001304716.1| formate acetyltransferase [Parabacteroides distasonis ATCC 8503]

```

-----MKFENEYWDHFKGETW
KREINVRDFIQ-----

```

```

-----SNY-----TPYEGDDSFLVASSEKTRKVV
NKLTEMFKVEREKGV-----YD---AETKLPQGIDVYGPYIDKENEVIVGLQTD-PL
KRGIFPKGG--IRMVENSLEA---YG-----
---YHLDPMTKEIFT-K-----YRKTHNEGVFSA---YTE-----
-EMVAAR-----RSAIITGLP---DAYGR-----
-----GRIIGDYRVA--LYGTAILIEEKKRFLNRLD-----
-----IQEITEEIIQSREEISEQI---KALKAFERMCAASYGFDVTRPAQNAREA
VQFVYLAYLAAVKDQDGAA--MSIGRTSTFLDIYIEKDIR-E--GKMTEEE-----AQEL
VDQLIIKLR--IVRFLRTPPEYNDLFSGDPVWVTES---LGGQ-GV-DGR--SLVTRTSYR
YLHTLYNLGPAPEPNLTVLWF-KNAPENWKRFCAKVS--IDTSAIQYEN-DDLMRPDYGD
-----DYGIA-CCVS-----PMKIGK
-QMQ-----FFGARANL--AKCLLYAINGGR---DERSGV-QV-----AP-MFE
PVRS-EYLEYDEVMAKYEQMMRWLAKVYVNALKIIHYMHDKYAYE--AFEMSLHDGDVER
IRATGI-----AGLSIVADSLAAIRD---TKVRV-IRDE-----
-----RGLAVDFE-----

```

```

-----REGE--YVPFGNDDRTDSIAVEITEKFMEYL-RQH--ETY--R----
--HAKPTQSILTITS-NVYVGKKTGTPDGRIGGTPFAP-GANPMNGRDTKGAI AALAS-
-VAKLPF-QHAHD-----GISYTFVAVSPATLGKEREMQINNLVSLLDGYFTP
---DGGQHLNVNVDKDLLIDAMEHPEKYPQLTIRVSGYAVNFVKL TREQQLDVISRTI
NHSL-----

```

>gi|212640611|ref|YP\_002317131.1| Pyruvate-formate lyase [Anoxybacillus flavithermus WK1]

```

-----MALLTVNEALMDAWRTFKGDKW
KKEIDVRDFIL-----

```

```

-----NNV-----TVYTGESFLEGPTATKLLW
EQVMELSKLERERGG-----VL--NMDTEIVSTITSHGPGYLNKELEKVVGFQTDE-PF
KRALMPFGG--IRMAEQACEA---YG-----

```

SupplementalMultipleSequenceAlign.txt

---YEVSDEVKKIFT-Q-----YRKTHNQGVFDV---YTD-----  
-EMKAAR-----KAGIITGLP---DAYGR-----  
-----GRIIGDYRRVA--LYGVDRLEIEKKKDLRN-----  
-----TGARTMSEDIIRLREELAEQI-----RALQELKEMAASYGYDISKPARNAHEA  
FQWLYFAYLAAIKEQNGAA--MSLGRVSTFLDIYIERDLQ-E--GTLTERE-----AQEL  
VDHFVMKLR--LVKFARTPEYNELFSGDPTWVTES---IGGV-AI-DGR--PLVTKNSFR  
FLHTLDNLGPAPEPNLTVLWS-TQLPEAFKKYCAKMS--IQTSSIQYEN-DDLMRPEFGD  
-----DYGIA-CCVS-----AMRIGK  
-QMQ-----FFGARANL--AKALLYAINGGV---DEKLV-QI-----GP-EFA  
PITS-EYLDYEEVMRKFDNMEWLAELYINTLNIHYMHDKYCYE--RIEMALHDTHILR  
TMATGI-----AGLSVVADSLSAIK---YAKVKT-IRDE-----  
-----NGLAVDFE-----

-----IEGD--FPYGNDDRDVDAIAVDIVERFMTKL-RKH--KTY--R----  
--DSKHHTSILTITS-NVYVGKKTGNTPDGRRAGEPFAP-GANPLHGRDTKGALASLSS-  
-VAKLPY-EYALD-----GISNTFSIVPKALGKDDATRIQNLVAILDGYAL-  
----KRGHHLNVNVFNRETLLDAMEHPEKYPQLTIRVSGYAVNFIKLTREQQIDVINRTF  
HETM-----

>gi|219870424|ref|YP\_002474799.1| pyruvate-formate lyase [Haemophilus parasuis  
SH0165]

-----MTQLTEAQKKAWEGFAPGEW  
QTDVNVRFIQ-----

-----KNY-----TPYEGDESFLADVTEATTTLW  
ADVMEKIKVENKTHE-----PY--DIDCDIPSTITSHAPGYINKDLEKIVGLQTD-PL  
KRAIMPFGG--INMVKGSKV---YR  
---RELNPEVEKIIFT-E-----YRKTHNQGVFDV---YTP-----  
-DILRCR-----KSGVITGLP---DAYGR-----  
-----GRIIGDYRRMA--LYGADFLMKDKVKQFTSLQ-----EQL---ERGED  
IQATI-----QLREEIAEQH---RALGKMKEMAASYGFDISNPATNAQEA  
VQWVYFAYLAAVKSQNGAA--MSFGRVSTFLDIYIERDLK-A--GKITEKE-----AQEL  
MDHLVMKLR--MVRFLRTPEYDQLFSGDPMWATET---FAGM-GL-DGR--TLVTKNSFR  
LLHTLYTMGPSPEPNLTILWS-ESLPDGFKRYAAKVS--IETSSVQYEN-DDLMRPFQFN  
-----D-----DYAIA-CCVS-----PMIVGK  
-MMQ-----FFGARANL--AKTLLYAINGGV---DEKSGD-QV-----GP-KTE  
PIMS-EYLDYDDVMTRLDSFMDWLAKQYVTALNIIHFMHDKYAYE--AALMALHDRDVFR  
TMACGI-----AGLSVAADSLSAIK---YAKVKP-IRGDIEIK  
NKAGEVVGVAKNVALDFE-----

-----IEGE--YPQFGNDDNRVDDIAVDLVERFMKKI-QKL--KTY--R----  
--NATPTQSVLTITS-NVYVGKKTGNTPDGRRSGAPFGP-GANPMHGRDQKGAVALSLS-  
-VAKLPF-AYAKD-----GISYTFIVPNALGKDLKESQKRNLAGLMDGYFHH  
ESTIEGGQHLNVNVMNREMLLDAMENPEKYPQLTIRVSGYAVRFNLSLTKQQMDVITRTF  
TQSM-----

>gi|92116483|ref|YP\_576212.1| formate acetyltransferase [Nitrobacter hamburgensis  
X14]

-----MKASAALRKEAKAGDCWDFQPGDW  
LSSINVRDFIV-----

-----RNV-----APYTGDEAFLTGPSQRTKAVW  
AKLQPYFAERKKGV-----LA--VDAQTPSTLLAHKAGYIDRDNEIIVGLQTDQ-PF  
KRAIFPFGG--LRMVETGLKA---AG  
---YEPDPAVHEAFT-K-----YRKSHNDGVFDA---YTP-----

SupplementalMultipleSequenceAlign.txt

-EIMNCR-----RSGIITGLP---DAYGR-----  
-----GRIIGDYRRVA--LYGIDRLAAKRAEREQID-----DM  
WPSDDII-----RLREELSDQM----RALEDLSSMAKLYGHDISKPARNAQEA  
FQWTFAYLGAIKEANGAA--MSIGRISSFLDIYIERDLK-Q--GVLDEGK-----AQEL  
WDQLVQKLR--IVRFLRTPDYDALFSGDPYWATEC---VGGM-DL-DGR--TLVTKSSYR  
MLHTLTNLGPAPEPNITVLWS--NHMPATFKRYCAKVS--DTSSLQYEN-DDLMRQFWGD  
-----DYGIA-CCVS-----AMRLGK  
-QMQ-----FFGARVNL--AKALLYAINGGR---DEVSGE-QV-----AP-RTL  
PVAG-DFLDYDDVMAKFDTIMEWLARTYVHAMNCIHYMHDKYFYE--RLEMALHDRDILR  
TMAFGI-----AGLSVADSLSAIK---YGKIRV-ARDA-----  
-----AGLVVDYQ-----

-----NEGNKATPQFGNDDRVDQIASDIVTSFMGKI-RKH--PTY--R-----  
--NATHTQSVLTITS--NVVYGKATGNTPDGRRKGEPPFGP-GANPMHGRDSDHGLASCLS-  
-VAKLPY-KDAQD-----GISYTVSVAPQKTHLSEGQLIDEAVKAFDVYFD-  
-----RGGFHMNLNVIDRDTLEDAMKNPDKYPQLTIRVSGYAVNFVRLTPEQQRDVISRTF  
HGQI-----

>gi|15601940|ref|NP\_245012.1| PflB [Pasteurella multocida subsp. multocida str. Pm70]

-----MSMSQLNETQQKAWEGFTGGDW  
QTEVNVDRDFIQ-----

-----KNY-----TPYEGDESFLADATEATTKLW  
NDVMEKIKVENKTHE-----PY--DIDCDTPSTITSHAPGYIDKSLEKIVGLQTDA-PL  
KRAIMPFGG--INMVKGSKV---YR-----  
---RELKPEVEQIFT-E-----YRKTHNQGVFDV---YTP-----  
-DILRCR-----KSGVITGLP---DAYGR-----  
-----GRIIGDYRRMA--LYGADFLMKDKFNQFTSLQ-----DKL---ERGED  
IQATI-----QLREEIAEQH----RALGKMKEMAASYGYDISGPATNAHEA  
VQWTFAYLAAVKSQNGAA--MSFGRVSTFLDIYIERDLK-A--GKITEQE-----AQEL  
IDHLVMKLR--MVRFLRTPDYDALFSGDPMWATET---LAGM-GL-DGR--TLVTKNSFR  
ILHTLYTMGPSPEPNLTILWS-EKLPEGFKRYAAKVS--IDTSSVQYEN-DDLMRPFQFN  
-----D-----DYAIA-CCVS-----PMIVGK  
-MMQ-----FFGARANL--AKTLLYAINGGV---DEKSGD-QV-----GP-KTD  
PITS-EYLDYDDVMTRLDSFMDWLAKQYVTALNIIHFMDKYAYE--AALMALHDRDVFR  
TMACGI-----AGLSVAADSLSAIK---YAKVKP-VRGDIEIK  
NKAGEVVGIAKDVAIDFE-----

-----IEGE--YPQFGNNDNRVDEIACDLVERFMKKI-QKL--GTY--R-----  
--NATPTQSVLTITS--NVVYGKKTGNTPDGRRSGAPFGP-GANPMHGRDQKGAVASLTS-  
-VAKLPF-AYAKD-----GISYTFIIVPNALGKDYEAKRNLAGLMDGYFHH  
EATIEGGQHLNVNVMNREMLLDAMENPEKYPQLTIRVSGYAVRFNSLTKEQQQDVITRTF  
TQAM-----

>gi|125973025|ref|YP\_001036935.1| formate acetyltransferase [Clostridium thermocellum ATCC 27405]

-----MDAWRGFNKGNW  
CQEIDVRDFII-----

-----RNY-----TPYEGDESFLVGPTDRTRKWL  
EKVSELLKKERENGG-----VL--DVDTHTISTITSHKPGYIDKELEVIVGLQTDE-PL  
KRAIMPFGG--IRMVIGGAEA---YG-----  
---HSVDPQVVEIFT-K-----YRKTHNQGVYDV---YTP-----  
-EMRKAK-----KAGIITGLP---DAYGR-----

SupplementalMultipleSequenceAlign.txt

```
-----GRIIGDYRRVA--LYGVDRLIAEKEKEMASLE-----RDYID
YETV-----RDREEISEQI----KSLKQLKEMALSYGFDISCPAKDAREA
FQWLYFAYLAAVKEQNGAA--MSIGRISTFLDIYIERDLK-E--GKLTEEL-----AQEL
VDQLVIKLR--IVRFLRTPEYEKLFSGDPTWVTES----IGGM-AL-DGR--TLVTKSSFR
FLHTLFNLGHAPEPNLTVLWS-VNLPEGFKKYCAKVS--IHSSSIQYES--DDIMRKHWD
-----DYGIA-CCVS-----AMRIGK
-QMQ-----FFGARCNL--AKALLYAINGGK---DEMTGE-QI-----AP-MFA
PVET-EYLDYEDVMKRFDMVLDWVARLYMNTLNIIHYMHDKYAYE--ALQMALHDKDVF
TMACGI-----AGLSVVADSLSAIK---YAKVKP-IRNE-----
-----NNLVVDYE-----
-----VEGD--YPKFGNNDERVDEIAVQVVKMFMNKL-RKQ--RAY--R----
--SATPTLSILTITS--NVVYGKKTGNTPDGRKAGEPLAP-GANPMHGRDINGALAVLNS-
-IAKLPY-EYAQD-----GISYTFSSIIPKALGRDEETRINNLKSMLDGYFK-
----QGGHHINNVNFEKETLLDAMEHPEKYPQLTIRVSGYAVNFIKLTREQLDVINRTI
HGKI-----
```

>gi|110803366|ref|YP\_698491.1| formate acetyltransferase [Clostridium perfringens SM101]

```
-----MFKQWEGFKEGVW
QKGIIDVRNFIQ-----
-----KNY-----TAYEGDKSFLEGGTTKRTDAVL
EKAQKLIIEEIEKGI-----ID---VATDRVSGIDNYEPGYLKDNEVIVGFQTD-PL
KRIVNPFGG--MRMVESLKE---YG-----
---YELDSSIREHFN-A-----YRKTHNQGVFDA---YSA-----
-ETRAAR-----SAGLLTGLP---DAYGR-----
-----GRIIGDYRRIA--LYGIDYLIIEKKKDYANISF-----ESEGSV-----
-----EEYIQLRENVSEI----RALEAIKSMAARYGFDISKPAANAKEA
VQFLYFGYLAAVKENNGAA--MSLGRSTSTFLDIFIERDLK-A--GTLTELE-----AQEL
IDQFIIKLR--LVRHLRTPEYNDFAGDPTWVTEG---IGGM-GV-NGK--PLVTKNSFR
YLQTLINLGPAPENMTVLWS-DRLPEGFKKFCAEVS--IKTDSIQYEN-DELMRPIYGD
-----DYSIA-CCVS-----AMQIGK
-QMQ-----FFGARTNL--AKALLYTINGGI---DEKSGKVI-----KGL
EPITDEVLDYDKLRANYDKVLEYVAKLYVDTMNVIIHYMHDKYAYE--AGQMALHDTHVGR
LMAFGI-----AGLSVVADSLSAVK---FAKVKP-IRE-----
-----NGIAVDFE-----
-----IEGD--FPKYGNDDDRVDDLAVEIVRKFSSEL-KKH--PLY--R----
--GAKHTLSILTITS--NVVYGKKTGSTPDGRKAGEAFAP-GANPMHGRDNSGALASLNS-
-VAKIPYCEVCD-----GVSNTFSIVPDALGKEEDSRIDNLVAIMDGYFK-
----QGAHHLNVNPNRETLMAMEHPEKYPTLTIRVSGYAVNFRNRLTRNQLEVISRTF
HDSL-----
```

>gi|18310135|ref|NP\_562069.1| formate acetyltransferase [Clostridium perfringens str. 13]

```
-----MFKQWEGFKEGVW
QNGIDVRNFIQ-----
-----KNY-----TAYEGDKSFLEGGTTKRTDAVL
EKAQKLIIEEIEKGI-----ID---VATDRVSGIDNYEPGYLKDNEVIVGFQTD-PL
KRIVNPFGG--MRMVESLKE---YG-----
---YELDSSIREHFN-A-----YRKTHNQGVFDA---YSA-----
-ETRAAR-----SAGLLTGLP---DAYGR-----
-----GRIIGDYRRIA--LYGIDYLIIEKKKDYANISF-----ESEGSV-----
```

SupplementalMultipleSequenceAlign.txt

-----EEYIQLRENVSEIQI-----RALEAIKSMAARYGFDISKPAANAKEA  
VQFLYFGYLAAVKENNGAA--MSLGRSTSTFLDIFIERDLK-A--GTLTELE-----AQEL  
IDQFIIKLR--LVRHLRTPYENDLFAGDPTWVTEG---IGGM-GV-NGK--PLVTKNSFR  
YLQTLINLGAPEPNMTVLWS-DRLPEGFKKFCAEVS--IKTDSIQYEN-DELMRPIYGD  
-----DYSIA-CCVS-----AMQIGK  
-QMQ-----FFGARTNL--AKALLYTINGGI---DEKSGKVVI-----KGL  
EPITDEVLDYDKLRANYDKVLEYVAKLYVDTMNVIIHYMHDKYAYE--AGQMALHDTHVGR  
LMAFGI-----AGLSVVADSLSAVK---FAKVVP-IRE-----  
-----NGIAVDFE-----

-----IEGD--FPKYGNDDRVDDLAVEIVRKFSSEL-KKH--PLY--R----  
--GAKHTLSILTITS--NVVYGKKTGSTPDGRKAGEAFAP-GANPMHGRDNSGALASLNS-  
-VAKIPYCEVCE-----GVSNTFSIVPDALGKEEDSRIDNLVAIMDGYFK-  
---QGAHHLNVNMFNRETLMAMEHPEKYPTLTIRVSGYAVNFRNLTRNQLEVISRTF  
HDSL-----

>gi|150389979|ref|YP\_001320028.1| formate acetyltransferase [Alkaliphilus  
metalliredigens QYMF]

-----MMTKVFSYKTGNW  
SRTIDVRDFIQ-----

-----LNY-----APYHGDAFLEKATESTKELW  
KQVLSLCEQERKNNG-----TL--DIDVDTISTIVSHKPGYIDENLEKIVGLQTD-PL  
KRAIMPFGG--IRTVDSACQA---YG-----  
---YELSSEIKDIFY-K-----YRKTHNDGVFDV---YTP-----  
-EMLAAR-----KAGIITGLP---DAYGR-----  
-----GRIIGDYRRVA--LYGIDRLIEDKNIQLASLEL-----DYM-----  
-----DENTMRLREEMAEQI---RALKELKEMGKSYGFDISRPASNAFEA  
IQWLYLGYLAAVKEQNGAA--MSLGRVSTFLDIYIEKDLA-D--GKLTEEQ-----AQEL  
VDHFVVKLR--MVRFLRTPDYNELFSGDPTWVTEC---IGGM-SM-DGR--TLVTKTSYR  
VLNTLYNLGAPEPNLTVLWS-TELPQNFKKFCSKAS--IDTSSIYEN-DDLMRPYWG  
-----DYGIA-CCVS-----AMRIGK  
-QMQ-----FFGARCNL--GKALLYAINGGR---DEMSSL-QV-----GP-KFA  
PITS-EYLDYQEVMEKFNTFIDWLAKLYVNTLNVIHYMHDKYAYE--RIEMALHDKDILR  
TMACGI-----AGLSLCADSLSAMK---YAKVKV-IRNE-----  
-----EGLAVDYE-----

-----IEGD--FPKYGNDDRVDDLAIELVERFMNSI-RRN--KTY--R----  
--DSIPTQSVLTITS--NVVYGKKTGSTPDGRKTGEPFAP-GANPMHGRDTKGALASLAS-  
-VAKLPY-EHAQD-----GISYTFIVPKALGKTTEERITILSSLLDGYFV-  
---QGGHHINNVFDRETLIDAMEHELYPQLTIRVSGYAVNFIKLSREQLDVINRTF  
HGAIY-----

>gi|170717255|ref|YP\_001784371.1| formate acetyltransferase [Haemophilus somnus  
2336]

-----MAQLTETQQKAWEGFVGGDW  
QTEVNVRDFIQ-----

-----KNY-----TPYEGDEAFLAEATEATSILW  
ADVMEKIKVENKTHE-----PY--DIDTDIPSTITSHKAGYINKDLEKIVGLQTD-PL  
KRAIMPFGG--INMVRGCKV---YR-----  
---RELNPEVEKIFT-E-----YRKTHNQGVFDV---YTP-----  
-DILRCR-----KSGVITGLP---DAYGR-----  
-----GRIIGDYRRMA--LYGADFLMKDKFKQFTSLQ-----EKLES  
GEDIQATI-----QLREEIAEQH-----RALGKMKEMAASYGYDISAPAKNAQEA

SupplementalMultipleSequenceAlign.txt

VQWTFAYLAAVKSNQNGAA--MSFGRVSTFLDIFIERDLK-A--GKITEQE-----AQEL  
IDHLVMKLR--MVRFLRTPEDQLFSGDPMWATET---LAGM-GL-DGR--TLVTKTSFR  
ILHTLYTMGPSPEPNLTILWS-ESLPDGFKRYAAKVS--IDTSSVQYEN-DDLMRPDFQN  
-----D-----DYAIA-CCVS-----PMIVGK  
-MMQ-----FFGARANL--AKTLLYAINGGI---DEKSGD-QV-----GP-KTD  
PITT-EYLDYEDVMTRLDSFMDWLAKQYVTALNIIHFHMDKYAYE--AALMALHDRDVFR  
TMACGI-----AGLSVAADSLSAIK---YAKVKP-IRGDIEVK  
NKAGDVIKSNVAIDFE-----

-----IEGE--YPQFGNDSRVDDIAVDLVERFMKKI-QKL--KTY--R----  
--NATPTQSVLTITS--NVVYGKKTGNTPDGRRSGAPFGP-GANPMHGRDQKGAVASLTS-  
-VAKLPF-AYAKD-----GISYTF SIVPNALGKDIDAQKRNLAGLMDGYFHH  
ETTIEGGQHLNVNVLNREMLLD AVENPDKYPQLTIRVSGYAVRFNSLTKDQQQDVITRTF  
TTSM-----

>gi|218439783|ref|YP\_002378112.1| formate acetyltransferase [Cyanothecce sp. PCC  
7424]

-----MGVHLNSTDNPTQELDQLMNKEWQDFTSGTW  
QEEINVRDFIQ-----

-----KNY-----TPYSGDQSFLTDASERTQTLW  
TQVKLLMQEREKGI-----LD---VETKVPSSITAHKPGYINKTLEQIVGLQTDK-PL  
KRAIMPYGG--IRVVQKSLEA---YG-----  
---YKLDPQTEKIFT-Q-----YRKTHNDGVFDA---YTS-----  
-QMRKAR-----HSGIITGLP---DAYGR-----

-----GRIIGDYRRVA--LYGIDRLIKDKREQLTSLE-----  
-----VEVMDEDTIRLREEISEQI-----RALGELKEMAADYGFDISKPAANAKEA  
LQWTFAYLGA VKEQNGAA--MSLGRSTSTFFDIYIERDLK-S--GLFTETD-----IQEF  
IDQFVMKLR--MVRFLRTPDYNQLFAADPVWVTEV---IGGV-GE-DGR--PLVTKTSFR  
FLHTLYNLGPAPEPNLTVLWS-QQLPIAFKRYCAKVS--IDTSSIQYEN-DDLMRPEYGD  
-----DYGIA-CCVS-----AMRVGK  
-QMQ-----FFGARVNM--AKALLYAINGGK---DEKAGE-QI-----AP-SFA  
PITA-EILDYEEVTAKFDLLMDWLARLYINTLNVIHYMHDKYCYE--RLEMALHDRDVYR  
TMACGM-----AGLSVVVDALSAIK---YATVKV-IRND-----  
-----QGLAQDYQ-----

-----IEGD--YPKYGNDDRVDEIAPNLVKT FMNKI-RSN--KTY--R----  
--NAVPTQSILTITS--NVVYGKKTGSTPDGRKAGEPFAP-GANPMHGRDSQGAIASCAS-  
-VAKLPY-EHAQD-----GISYTF SIMPRALGKTQDTQINNLVGVLDGYFH-  
---DSGHHININVFERETLLDAMDHPEKYPQLTIRVSGYAVNFIKLNREQLDVINRTF  
HERI-----

>gi|16272145|ref|NP\_438348.1| formate acetyltransferase [Haemophilus influenzae Rd  
KW20]

-----MTMSELNEMQKLAWAGFAGGDW  
QENVNVRDFIQ-----

-----KNY-----TPYEGDSDFLAGPTEATTKLW  
ESVMEGIKIENRTHA-----PL--DFDEHTPSTIISHAPGYINKDLEKIVGLQTDK-PL  
KRAIMPFGG--IKMVEGSCKV---YG-----  
---RELDPKVKKIFT-E-----YRKTHNQGVFDV---YTP-----  
-DILRCR-----KSGVLTGLP---DAYGR-----  
-----GRIIGDYRRVA--LYGVDFLMKDKYAQFSSLQK-----DL---EDGVN  
LEATI-----RLREEIAEQH-----RALGQLKQMAASYGYDISNPATNAQEA  
IQWMYFAYLAAIKSNQNGAA--MSFGRTATFIDVYIERDLK-A--GKITETE-----AQEL

SupplementalMultipleSequenceAlign.txt

VDHLVMKLR--MVRFLRTPEYDQLFSGDPMWATET---IAGM-GL-DGR--TLVTKNTFR  
ILHTLYNMGTSPEPNLTILWS-EQLPENFKRFCAKVS--IDTSSVQYEN-DDLMRPFNN  
-----D-----DYAIA-CCVS-----PMIVGK  
-QMQ-----FFGARANL--AKTLLYAINGGI---DEKLG M-QV-----GP-KTA  
PITD-EVLDFDTVMTRMDSFMDWLAKQYVTALNVIHYMHDKYSYE--AALMALHDRDVYR  
TMACGI-----AGLSVAADSLSAIK---YAKVKP-VRGDIKDK  
DGNVVA----TNVAIDFE-----

-----IEGE--YPQYGNNDRVDDIACDLVERFMKKI-QKL--KTY--R----  
--NAVPTQSVLTITS-NVYVGKKTGNTPDGRRAGAPFGP-GANPMHGRDQKGAVASLTS-  
-VAKLPF-AYAKD-----GISYTF SIVPNALGKDAEAQRRNLAGLMDGYFHH  
EATVEGGQHLNVNVLNREMLLDAMENPKYPQLTIRVSGYAVRFNSLTKEQQQDVITRTF  
TESM-----

>gi|15894267|ref|NP\_347616.1| pyruvate-formate lyase [Clostridium acetobutylicum  
ATCC 824]

-----MIKEW NDFKEGTW  
VNNIDVRNFIQ-----

-----KNY-----TPYLG NEDFLQGVTDR TKGLW  
NKCEKLLLDEIKNQG-----IL--KADNKT VSGINSFEAGYIDKENEIYGLQTDE-PL  
KRMVNPFGG--IRMAKQALEA---YG-----  
---YEIDEDVYNI FT-K-----YR KTHNEGVFDA---YTE-----  
-EMKTAR-----HVGLLTGLP---DAYGR-----  
-----GRIIGDFRVA--LYGIDCLIENKKADL KELKG-----  
-----DMTEDLIRREEVSEQI---KALKEMKAMALKY GIDISKPAANSRQA  
VQFTYLG YLAGIKENNGAA--MSLGRVSTFLDIYIERDLK-N--GVITEKE-----AQEI  
IDQFIIKLR--LERHLRTPEYNELFAGDPN WVTES---IGGM-GM-NGE--TLVTKNSFR  
FLHSLTNLGPAPENMTVLWS-NNLPEPFKKYCSKMS--IKTDAIQYEN-DDIMRPIYGD  
-----DYGIA-CCVS-----AMKIGK  
-QMQ-----FFGARCNL--AKSLLYAINGGV---DEKKFD-LV-----VP-HIK  
RIDD-EVL DYDKVKENYFKVMKYVAKLYVNTLNL IHYMHDKYAYE--KGLMALHDTDVHR  
FLACGA-----AGLSVAVDLSA IK---YAKVKP-IRNE-----  
-----DGI AVDFE-----

-----VEGD--FPKYGNDDRRVDDIAVEIVNKFMS EL-RKT--AAY--R----  
--NAEHTLSMLTITS-NVMYGKKTGATPDGRKSGEAFAP-GANPMHGRDKNGALASLNS-  
-VAKIPYRSVCQD-----GVSNTFSIIPDALGKNEETRAN NLSAILDGYFE-  
-----KGAHHLNVNVLNRETL LDAMENPEKYPTLTIRVSGYAVNFVKL TKEQQMEVVKRTF  
HGRM-----

>gi|113461279|ref|YP\_719348.1| formate acetyltransferase [Haemophilus somnus 129PT]

-----MAQLTETQQAWEGFVGGDW  
QTEVNVRDFIQ-----

-----KNY-----TPYEGDEAFLAEATEATSILW  
ADVMEKIKVENKTHE-----PY--DIDTDIPSTITSHKAGYINKDLEKIVGLQ TDA-PL  
KRAIMPFGG--INMVRG SCKV---YR-----  
---RELNPEVEKI FT-E-----YR KTHNQGVFDV---YTP-----  
-DILRCR-----KSGVITGLP---DAYGR-----  
-----GRIIGDYRRMA--LYGADFLMKDKFKQFTSLQ-----EKLES  
GEDIQATI-----QLREEIAEQH---RALGKM KEMAASYGYDISAPAKNAQEA  
VQWTFYFAYLA AVKSQNGAA--MSFGRVSTFLDI FIERDLK-A--GKITEQE-----AQEL  
IDHLVMKLR--MVRFLRTPEYDQLFSGDPMWATET---LAGM-GL-DGR--TLVTKTSFR  
ILHTLYTMGPSPEPNLTILWS-ESLPDGFKRYAAKVS--IDTSSVQYEN-DDLMRPFQ N



SupplementalMultipleSequenceAlign.txt

-----D-----DYAIA-CCVS-----PMIVGK  
-MMQ-----FFGARANL--AKTLLYAINGGI---DEKSGD-QV-----GP-KTD  
PITT-EYLDYEDVMTRLDSFMDWLAKQYVTALNIIHFMDKYAYE--AALMALHDRDVFR  
TMACGI-----AGLSVAADSLSAIK---YAKVKP-IRGDIEVK  
NKAGDVIKSNVAIDFE-----

-----IEGE--YPQFGNDSRVDDIAVDLVERFMKKI-QKL--KTY--R----  
--NATPTQSVLTITS--NVVYGKKTGNTPDGRRSGAPFGP-GANPMHGRDQKGAVASLTS-  
-VAKLPF-AYAKD-----GISYTFIVPNALGKDIDAQKRNLAGLMDGYFHH  
ETTIEGGQHLNVNVLNREMLLDAVENPDKYPQLTIRVSGYAVRFNSLTKEQQQDVITRTF  
TTSM-----

>gi|33152127|ref|NP\_873480.1| formate acetyltransferase [Haemophilus ducreyi  
35000HP]

-----MIQLDEAQQKAWAGFVAGTW  
QTEVNVRFIQ-----

-----KNY-----TPYEGDESFLAGATPATTKLW  
QEVMKIKVENKTHE-----PY--DIDCDIPSTITSHKPGYIDQSLEKIVGLQTD-PL  
KRAILPFGG--IKMVKGSCDV---YR-----  
---RKLNPEVEKIIFT-E-----YRKTHNQGVFDV---YTP-----  
-DILRCR-----KSGVITGLP---DAYGR-----

-----GRIIGDYRRLA--VYGADFLMKDKQRQFASLQP-----NL---EAGED  
IQATI-----QLREEITEQF-----RALGQIKEMAASYGFDVSRPAENAQEA  
VQWTFYFAYLAAVKSQNGAA--MSFGRVSSFLDIYIERDLK-A--GKITEEE-----AQEL  
IDHLVMKLR--MVRFLRTPEYDQLFSGDPMWATET---LAGM-GL-DDR--TLVTKNSFR  
ILNTLYTMGPSPEPNLTILWS-EQLPEGFKRYCAKVS--IDTSSVQYEN-DDLMRPDFDN  
-----D-----DYAIA-CCVS-----PMVIGK  
-QM-----FFGARANL--AKTMLYAINGGI---DEKSGD-QV-----GP-KST  
PITD-EVLNFDVDMTRMDHFMWLATQYVTALNIIHFMDKYAYE--AALMAFHDRDVFR  
TMACGI-----AGLSVAADSLSAIK---YAKVKP-VRGDIKDK  
DGNIVA----TNVALDFE-----

-----IEGE--YPQFGNDSRVDDIACDLVERFMKKI-QTH--KTY--R----  
--NATPTQSVLTITS--NVVYGKKTGNTPDGRRAGAPFGP-GANPMHGRDQKGAVASLTS-  
-VAKLPF-AYAKD-----GISYTFIVPNALGKDYEAQKRNLAGLMDGYFHH  
ETSVEGGQHLNVNVLNRETLTDAVEHPEKYPQLTIRVSGYAVRFNALTKEQQMDVITRTF  
TESM-----

>gi|52080503|ref|YP\_079294.1| putative formate C-acetyltransferase [Bacillus  
licheniformis ATCC 14580]

-----MEQWKGFTTNVW  
QKEVNVRFIL-----

-----SNF-----EPYQGESFLEPTEATSALW  
DHVMDLTKKERENGG-----VL--DMDTEIVSTITSHGPGYLNKDKLEKVVGVQTDE-PF  
KRSLQPF--IRMAKQACES---YG-----  
---FKLNEEVERIFT-D-----YRKTHNQGVFDA---YTD-----  
-EMKLAR-----KVGIIITGLP---DAYGR-----  
-----GRIIGDYRVA--LYGVDFLIDKDDAAGTSR-----  
-----VMSEENIRLREELSEI-----RALNELKALAKSYGFDISKPAANAREA  
FQWLYFAYLAAIKEQNGAA--MSLGRVSTFLDIYIERDLK-T--GVLTERE-----AQEL  
VDHFVMKLR--LVKFARTPDYNELFSGDPTWVTE---IGGM-AH-DGR--ALVTKNSFR  
FLHTLDNLGPAPEPNLTVLWS-VRLPQKFKNYCAKMS--IKTSSIQYEN-DDIMRPEYGD  
-----DYGIA-CCVS-----AMAIGK

SupplementalMultipleSequenceAlign.txt

-QMQ-----FFGARANL--AKALLYAINGGK---DEKHKM-QV-----GP-EMP  
PVAS-DVLDYDEVMHKFDQTMEWLAGLYINTLNVIHYMHDKYCYE--RIEMALHDTEILR  
TMATGI-----AGLSVVADSLSAVK---YAKVSV-VRDE-----  
-----NGIAVDFE-----

-----TEGD--FPKYGNDDRVDIAIVDIVKRFMKKL-RKH--QTY--R----  
--QSVQTMSILTITS-NVVGKKTGNTPDGRRAGEPFAP-GANPMHGRDTKGTLASLSS-  
-VAKLPY-SYALD-----GISNTFSIVPKALGKDEESRAANLSSILDGYAA-  
----KTGHHLNVNVFNRETLLDAMEHPPEEYPQLTIRVSGYAVNFIKLTKEQQLDVISRTF  
HESM-----

>gi|187736033|ref|YP\_001878145.1| formate acetyltransferase [Akkermansia muciniphila  
ATCC BAA-835]

-----MISIVKDLKESTALPQEWQGFKPGTW  
TESIDVRDFIQ-----

-----HNY-----TPYSGNEEFSLGSPSQRTRLRLW  
DELKVLLKREIDNGG-----VL--DADEKVVSSITSHKPGYIDKELEVVVGLQTDA-PL  
KRALMPFGG--LRMAQQALES---YG-----  
---FKMCEKTADIFK-K-----IRKTHNEGVFDA---YTS-----  
-DIRAAR-----SAGIITGLP---DAYGR-----  
-----GRIIGDYRRVA--LYGTDKLIERRKDLKNREH-----  
-----SPLTDELIRLREEMSEI----RALEELAQLGASYGCDLTRPAANAREA  
VQWTYLGYLAAVKEQNGAA--MSLGRVSTFFDIYFTRDLE-Q--GLITEEE-----VQEI  
IDQFVMKLR--IVRFIRTPDYNNLFSGDPTWVTES---IGGM-GE-DGR--TLVTRSSFR  
MLQTLYNLGPAPENLTVLWS-RNLPEAFKSFCAKVS--IETSSVQYEN-DDLMRPHWGD  
-----DYGIA-CCVS-----AMRIGK

-QMQ-----FFGARANL--AKCLLYALNGGV---DELKGG-QV-----AP-PSP  
RYTE-EILNYDEVMTLYDKMQDWLAKTYIDALNIIHYMHDKYCYE--RIEMALHDPEILR  
TMATGI-----AGLSVAADSLSAIK---YATVKA-IRNE-----  
-----EGLIVDFK-----

-----TEGE--FPCYGNDDPRVDDIACSLVSNFMEKL-RRL--HTY--R----  
--NSLPTQSILTITS-NVVGKKTGNTPDGRRAGEPFAP-GANPMHGRDRNGAVASMLS-  
-VAKLSY-DDSLD-----GISYTFIVPQALGKEERERRVCLVSLLDAYFA-  
----ATGHHINNVLERETLLDAMDHPEKYPQLTIRVSGYAVNFIKLTREQQQEVINRTF  
HTR-----

=====
